# Supplementary material for: Transcriptome and Metabolome Analyses Revealed the Response Mechanism of Sugar Beet to Salt Stress of Different Durations
Source: MDPI journal article supplement (doi:10.3390/ijms23179599), 2022-08-24
Supplement: s1 [file s1]

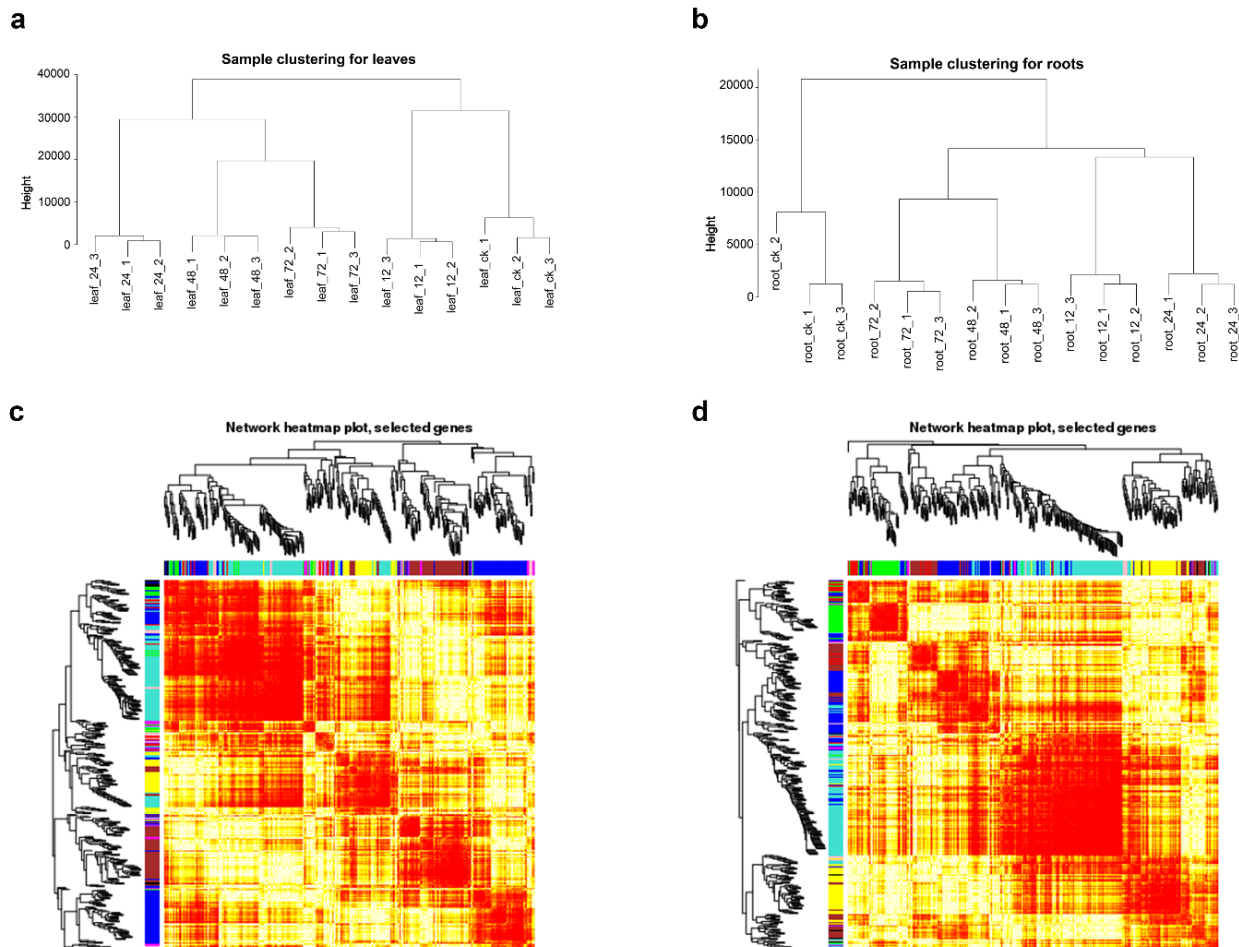

**Fig. S5 Construction of gene co-expression networks.** Sample outlier check for leaves (a) and roots (b). Network heatmap plot of hierarchical clustering of the TOM matrix for the co-expressed genes in leaves (c) and roots(d).
