# Supplementary material for: Transcriptome and Metabolome Analyses Revealed the Response Mechanism of Sugar Beet to Salt Stress of Different Durations
Source: MDPI journal article supplement (doi:10.3390/ijms23179599), 2022-08-24
Supplement: s1 [file s1]

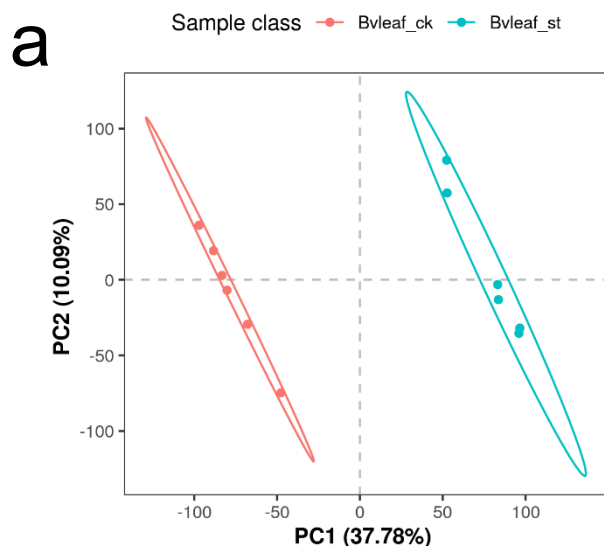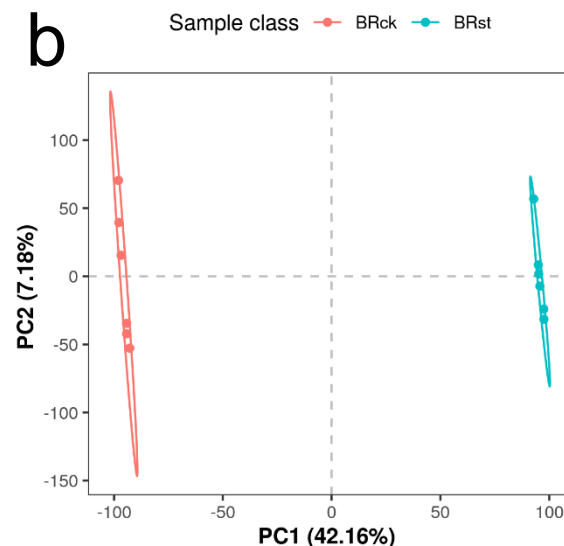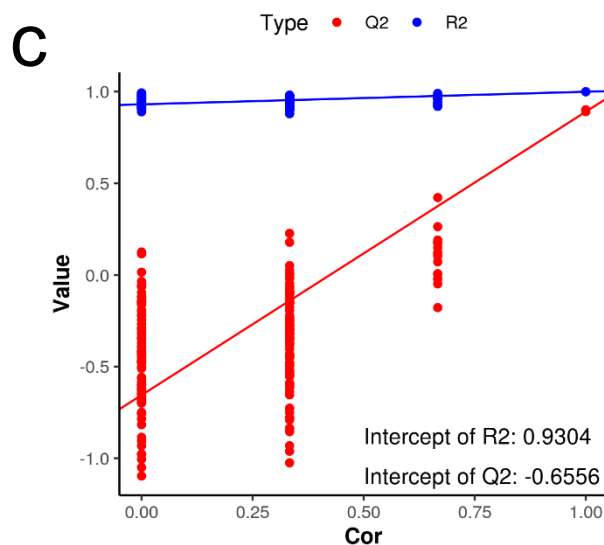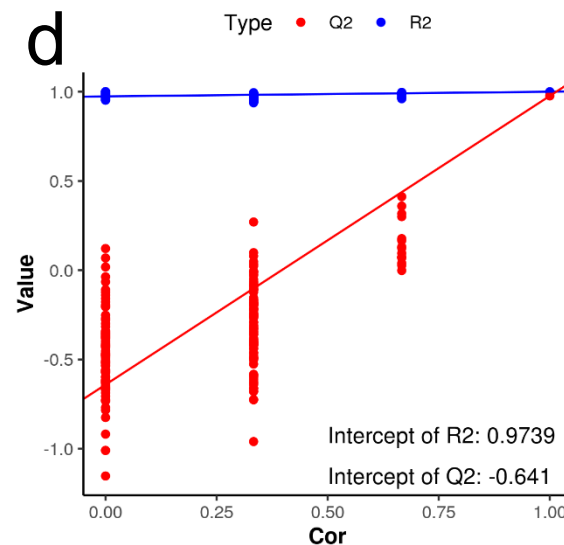

**Fig.S7 Principal Component Analysis (PCA) and partial least squares discrimination analysis (PLS-DA) of metabolites between st and ck.** PCA of leaves (a) and roots (b). PLS-DA of leaves (c) and roots (d). R2 represents model explanation rate, Q2 represents model prediction rate.
