# Supplementary material for: Transcriptome and Metabolome Analyses Revealed the Response Mechanism of Sugar Beet to Salt Stress of Different Durations
Source: MDPI journal article supplement (doi:10.3390/ijms23179599), 2022-08-24
Supplement: s1 [file s1]

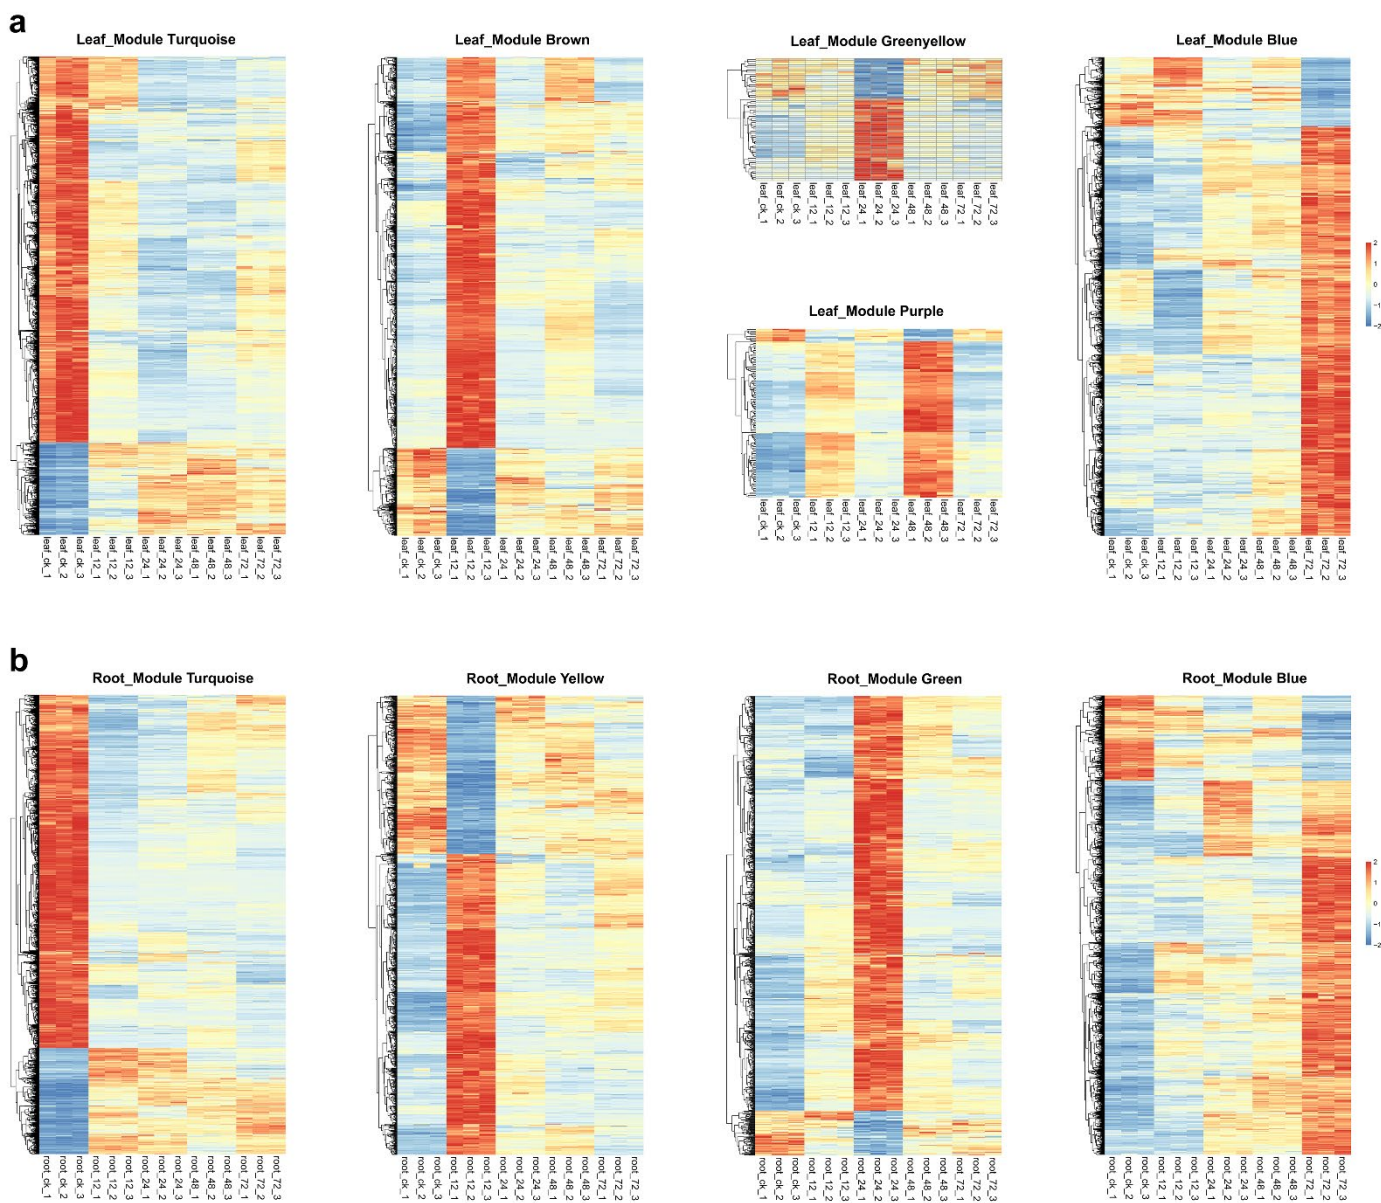

**Fig. S6 Heatmap comparison showing the expression profiles of genes in each critical module. (a) The critical modules in leaves; (b) The critical modules in roots.**
