# Supplementary material for: Transcriptome and Metabolome Analyses Revealed the Response Mechanism of Sugar Beet to Salt Stress of Different Durations
Source: MDPI journal article supplement (doi:10.3390/ijms23179599), 2022-08-24
Supplement: s1 [file s1]

a

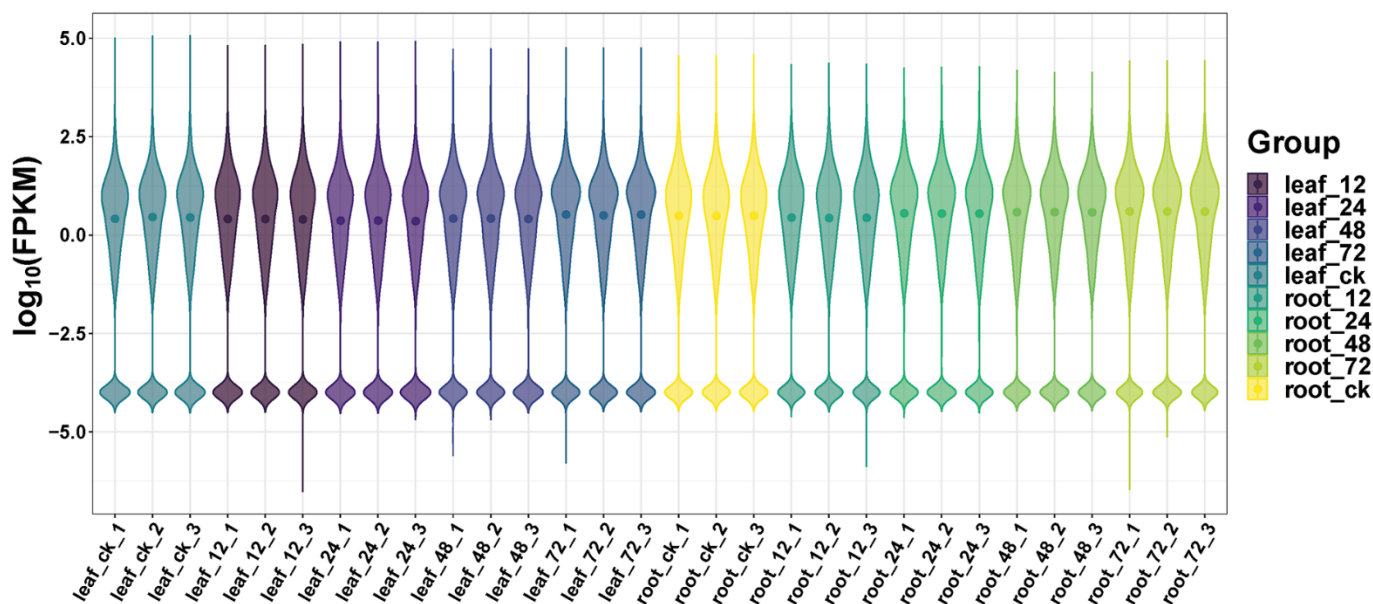

b

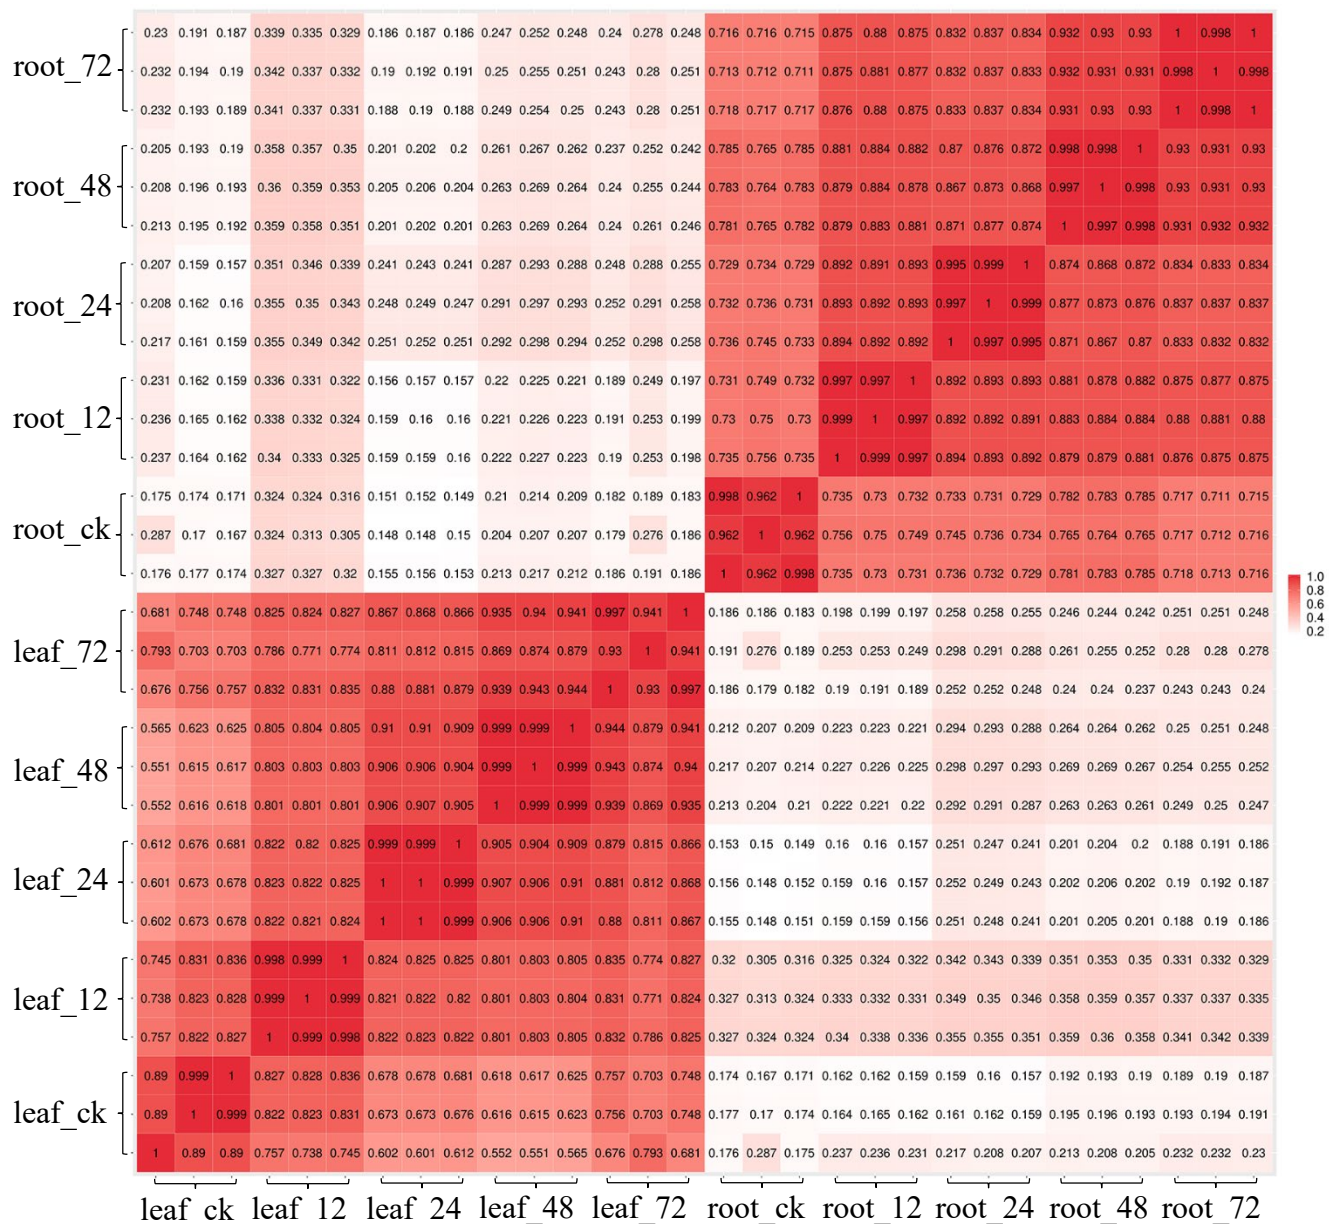

**Fig.S2 Overview of gene expression patterns in each sample under salt stress.**  
 (a) Gene expression levels (b) Correlation of expressed genes in each sample.
