# Supplementary material for: Transcriptome and Metabolome Analyses Revealed the Response Mechanism of Sugar Beet to Salt Stress of Different Durations
Source: MDPI journal article supplement (doi:10.3390/ijms23179599), 2022-08-24
Supplement: s1 [file s1]

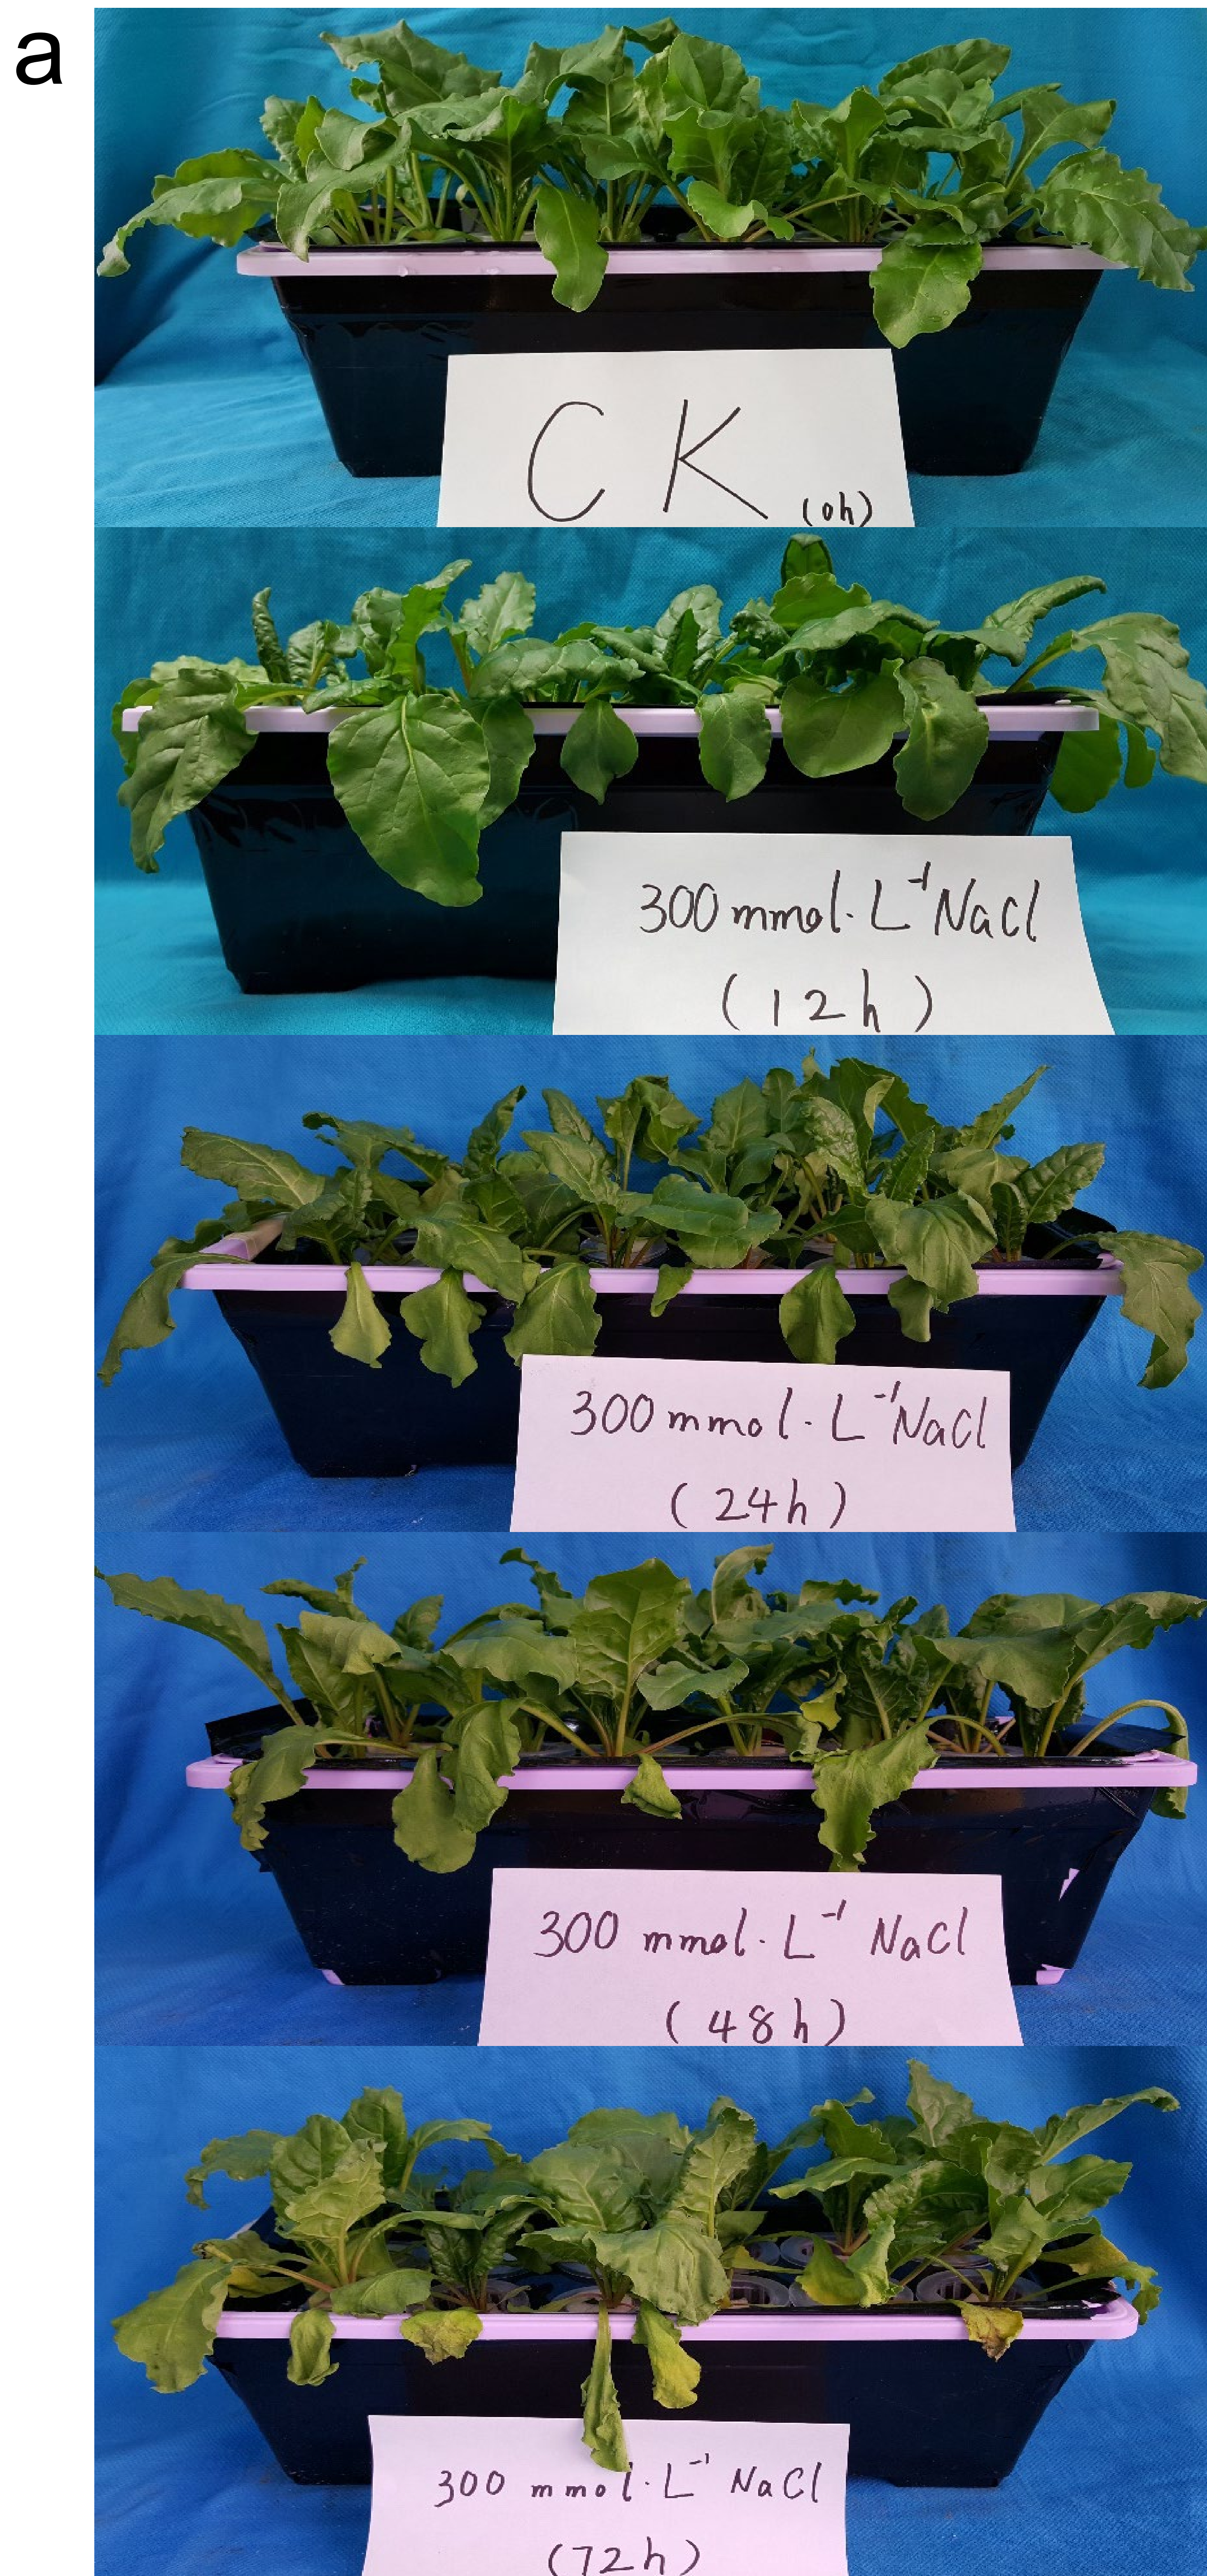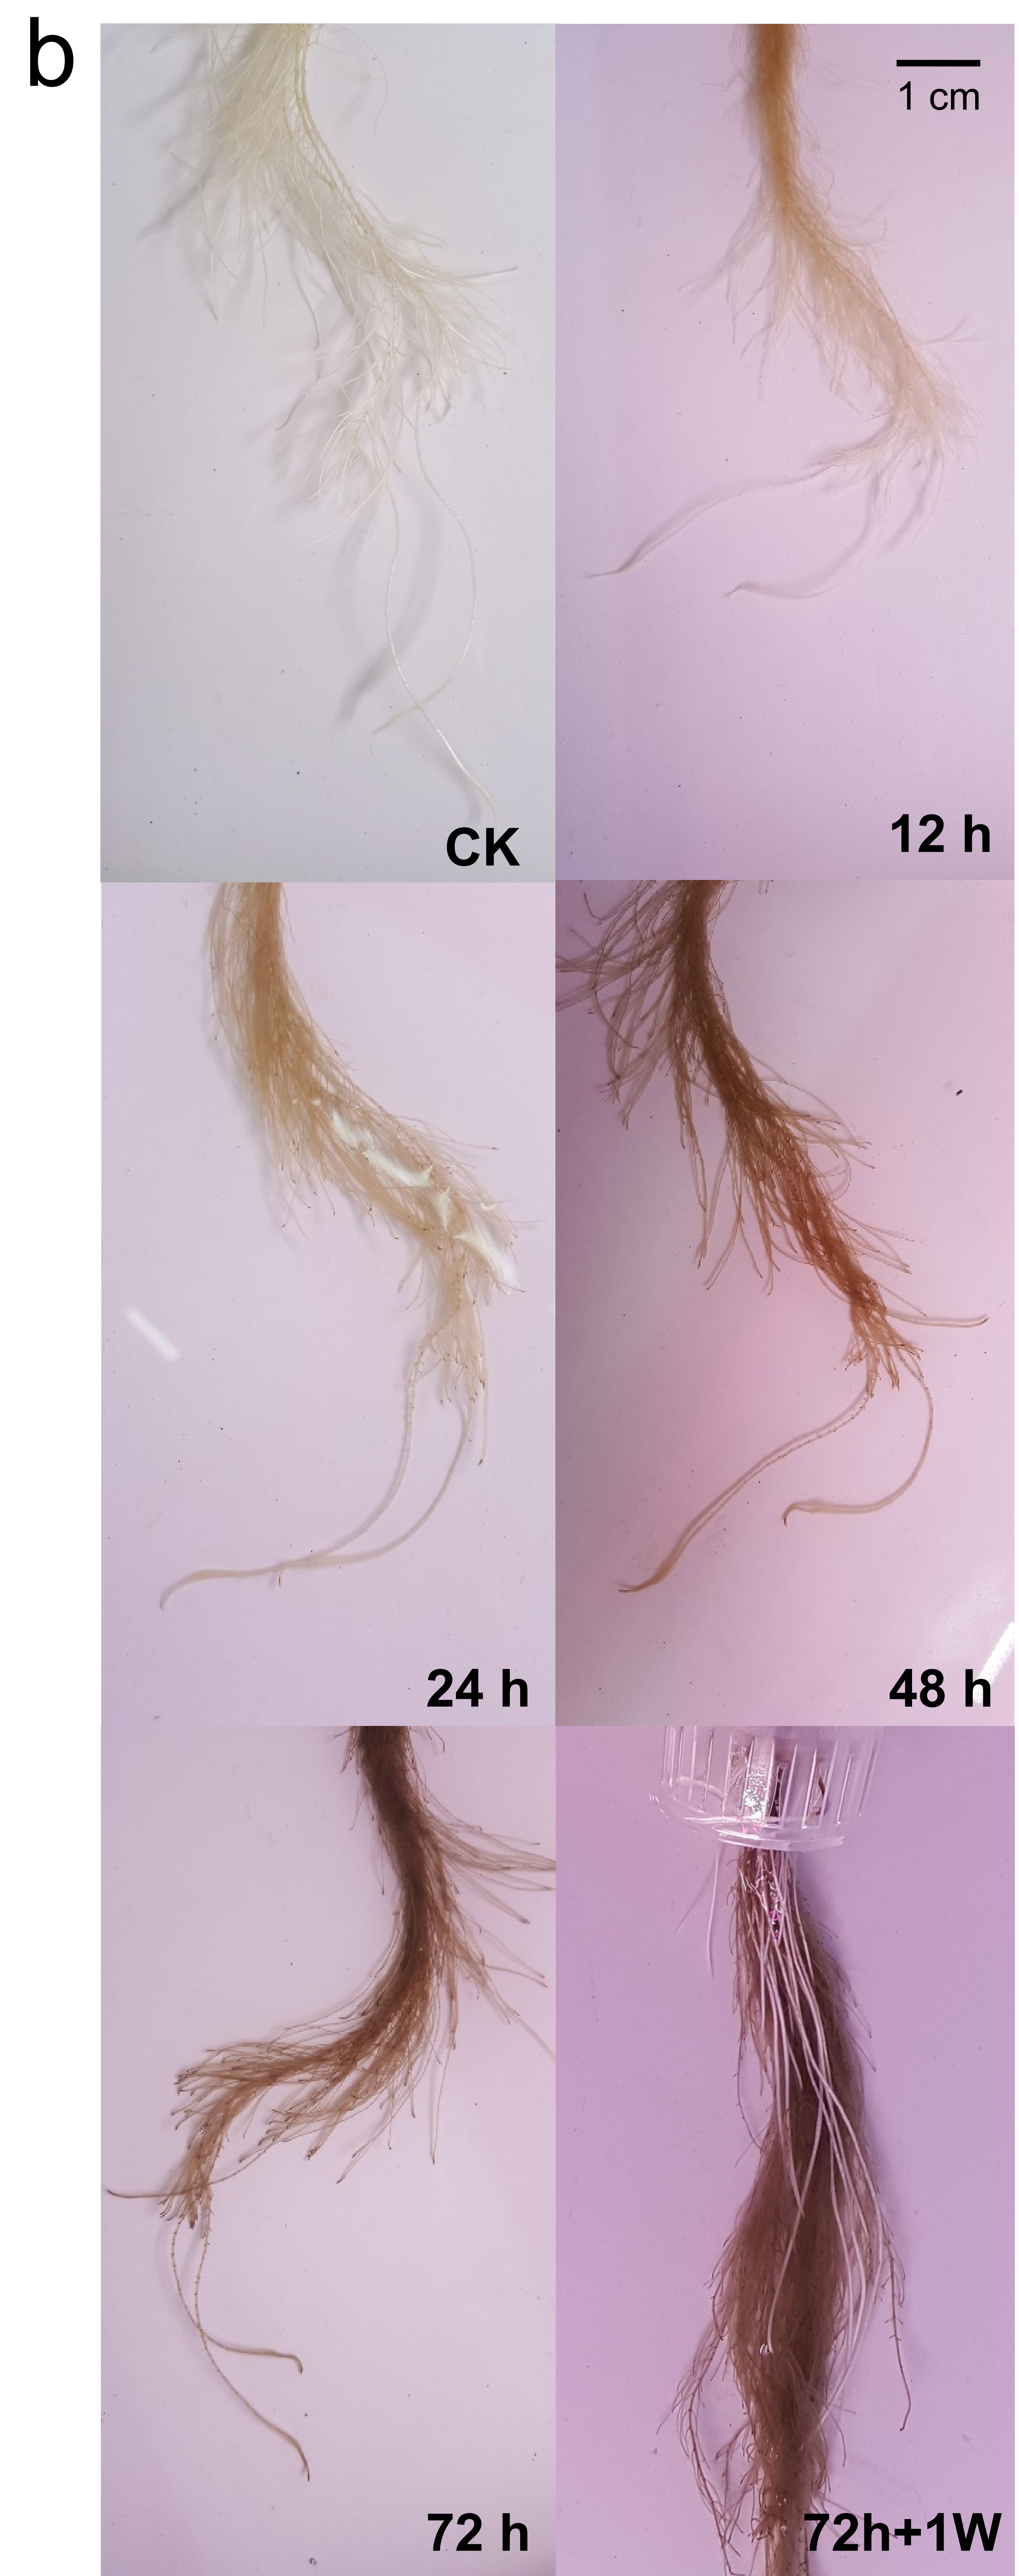

**Fig S1. The changes of sugar beet O68 seedlings under different durations of salt treatments.** (a) leaves, (b) roots (Photos taken from the same sample); 1 w represents rehydration for one week after 72 h salt treatment.
