# Supplementary material for: Transcriptome and Metabolome Analyses Revealed the Response Mechanism of Sugar Beet to Salt Stress of Different Durations
Source: Int J Mol Sci. 2022 Aug 24;23(17):9599. doi: 10.3390/ijms23179599 (PMC9455719; doi:10.3390/ijms23179599)
Supplement: Supplementary file 1 [file ijms-23-09599-s001.zip]

Archive with 15 entries (15 files):
- Figure S1 The changes of sugar beet O68 seedlings under different durations of salt treatments.pdf
- Figure S2  Overview of gene expression patterns in each sample under salt stress.pdf
- Figure S3 Expression patterns of common DEGs.pdf
- Figure S4 GO annotation of common DEGs in leaves(a) and roots(b).pdf
- Figure S5 Construction of gene co-expression networks.pdf
- Figure S6 Heatmap comparison showing the expression profiles of genes in each critical module.pdf
- Figure S7 Principal Component Analysis (PCA) and partial least squares discrimination analysis (PLS-DA) of metabolites between st and ck.pdf
- Figure S8 KEGG annotation of DEMs in leaves(a) and roots(b).pdf
- Table S1 Summary of RNA-seq data.xlsx
- Table S2 Details information of differentially expressed genes (DEGs) in leaves under salt-stress.xlsx
- Table S3 Details information of differentially expressed genes (DEGs) in roots under salt-stress.xlsx
- Table S4 Details information of differentially accumulated metabolites (DAMs) in leaves under salt-stress.xlsx
- Table S5 Details information of differentially accumulated metabolites (DAMs) in roots under salt-stress.xlsx
- Table S6 Overview of salt treatment duration and Sampling time.xlsx
- Table S7 List of primers used for qRT-PCR experiments.xlsx
