# Supplementary material for: Transcriptome and Metabolome Analyses Revealed the Response Mechanism of Sugar Beet to Salt Stress of Different Durations
Source: Int J Mol Sci. 2022 Aug 24;23(17):9599. doi: 10.3390/ijms23179599 (PMC9455719; doi:10.3390/ijms23179599)
Supplement: Supplementary file 1 [file ijms-23-09599-s001.zip › Table S1 Summary of RNA-seq data.xlsx]

## Sheet: Sheet1
Table S3 Summary of RNA-seq data
Sample	Raw Data	Valid Data	Q20%	Q30%	Mapped reads	Mapped Ratio %	Unique Mapped reads	Unique Mapped Ratio %
leaf_ck_1	43018544	41997642	99.98	97.85	37934608	90.33	26682267	63.53
leaf_ck_2	43984288	42757548	99.98	97.81	39807175	93.1	28700060	67.12
leaf_ck_3	38573074	37631928	99.99	97.92	35140114	93.38	25578500	67.97
leaf_12_1	37598380	36692746	99.98	97.76	34010603	92.69	24595811	67.03
leaf_12_2	44689792	43587704	99.98	97.68	40399246	92.68	29399239	67.45
leaf_12_3	43430798	42432818	99.99	97.79	39550711	93.21	28943566	68.21
leaf_24_1	45048370	43922530	99.98	97.84	40966171	93.27	29457606	67.07
leaf_24_2	49234012	48068086	99.98	97.81	44751488	93.1	32161710	66.91
leaf_24_3	39706090	38830176	99.99	97.79	36202170	93.23	26145323	67.33
leaf_48_1	52456282	51242026	99.98	97.74	47499078	92.7	33721659	65.81
leaf_48_2	53675904	52316484	99.98	97.7	48416355	92.55	34531872	66.01
leaf_48_3	42783116	41832142	99.99	97.88	38882197	92.95	27908910	66.72
leaf_72_1	51360932	50176222	99.98	97.87	46426733	92.53	33284972	66.34
leaf_72_2	53179078	51878440	99.98	97.75	46930472	90.46	32955807	63.53
leaf_72_3	43883476	42744710	99.98	97.88	39664649	92.79	28521875	66.73
root_ck_1	49897258	48838748	99.98	97.71	44529741	91.18	32691987	66.94
root_ck_2	50989616	49729958	99.98	97.76	45328874	91.15	33063313	66.49
root_ck_3	45767762	44714776	99.98	97.77	40935477	91.55	30086690	67.29
root_12_1	45351318	44133256	99.98	97.76	40403103	91.55	29146424	66.04
root_12_2	40278210	39389978	99.99	97.9	36319517	92.2	26478889	67.22
root_12_3	45486418	44218012	99.98	97.87	40682491	92	29363404	66.41
root_24_1	45342534	44061246	99.98	97.79	39960472	90.69	29410271	66.75
root_24_2	36020822	35271870	99.99	97.83	32364834	91.76	23749924	67.33
root_24_3	43951740	42725934	99.98	97.74	39182739	91.71	28514780	66.74
root_48_1	51125752	49828924	99.98	97.78	45822323	91.96	33707452	67.65
root_48_2	37183200	36382294	99.99	97.88	33602889	92.36	24812672	68.2
root_48_3	45551884	44404612	99.98	97.88	40952686	92.23	30125094	67.84
root_72_1	47513256	46416796	99.98	97.7	42092973	90.68	30742665	66.23
root_72_2	35705740	34910222	99.98	97.77	31874446	91.3	23433685	67.13
root_72_3	51334286	49891436	99.98	97.91	45615597	91.43	33655401	67.46
