# Supplementary material for: Transcriptome and Metabolome Analyses Revealed the Response Mechanism of Sugar Beet to Salt Stress of Different Durations
Source: Int J Mol Sci. 2022 Aug 24;23(17):9599. doi: 10.3390/ijms23179599 (PMC9455719; doi:10.3390/ijms23179599)
Supplement: Supplementary file 1 [file ijms-23-09599-s001.zip › Table S2 Details information of differentially expressed genes (DEGs) in leaves under salt-stress.xlsx]

## Sheet: Sheet1
Table S4 Details information of differentially expressed genes (DEGs) in leaves under salt-stress
gene_id	Co-expression module	connectivity in module	Description	GO	KEGG	KO_ENTRY	EC	leaf_ck_1	leaf_ck_2	leaf_ck_3	leaf_12_1	leaf_12_2	leaf_12_3	leaf_24_1	leaf_24_2	leaf_24_3	leaf_48_1	leaf_48_2	leaf_48_3	leaf_72_1	leaf_72_2	leaf_72_3	pval	qval
Bv9_212820_ihpx	black	174.995	PREDICTED: lysM domain-containing GPI-anchored protein 2 [Beta vulgaris subsp. vulgaris]	GO:0005886(plasma membrane);GO:0006952(defense response);GO:0008061(chitin binding);GO:0009506(plasmodesma);GO:0016998(cell wall macromolecule catabolic process);GO:0031225(anchored component of membrane);GO:0046658(anchored component of plasma membrane)	04626(Plant-pathogen interaction)	K13473	NA	83.95	92.52	86.51	144.48	152.77	144.13	14.87	14.33	14.1	16.53	19.04	18.48	17.76	18.82	21.35	0	0
Bv4_087170_ygkw	black	172.762	PREDICTED: disease resistance protein RPS2 [Beta vulgaris subsp. vulgaris]	GO:0005515(protein binding);GO:0005524(ATP binding);GO:0005886(plasma membrane);GO:0006952(defense response);GO:0007165(signal transduction);GO:0043531(ADP binding)	04626(Plant-pathogen interaction)	K13459	NA	6.89	8.7	8.26	14.41	13.98	13.08	0.87	0.92	0.95	1.64	1.91	1.92	2.39	1.78	1.58	5.43954e-207	1.87868e-205
Bv1_016040_zdum	black	172.062	PREDICTED: methylcrotonoyl-CoA carboxylase beta chain, mitochondrial [Beta vulgaris subsp. vulgaris]	GO:0004075(biotin carboxylase activity);GO:0004485(methylcrotonoyl-CoA carboxylase activity);GO:0005524(ATP binding);GO:0005739(mitochondrion);GO:0005759(mitochondrial matrix);GO:0006552(leucine catabolic process);GO:0008270(zinc ion binding);GO:0050897(cobalt ion binding);GO:1905202(methylcrotonoyl-CoA carboxylase complex)	00280(Valine, leucine and isoleucine degradation)	K01969	EC:6.4.1.4	193.81	214.86	225.56	297.3	285.75	288.91	97.99	103.88	92.86	92.93	99.85	93.39	96.66	87.07	93.41	2.63851e-125	4.61843e-124
Bv1_009580_ogpe	black	170.752	PREDICTED: probable glucan 1,3-beta-glucosidase A [Beta vulgaris subsp. vulgaris]	GO:0000324(fungal-type vacuole);GO:0000935(division septum);GO:0004338(glucan exo-1,3-beta-glucosidase activity);GO:0005576(extracellular region);GO:0009277(fungal-type cell wall);GO:0009986(cell surface);GO:0031589(cell-substrate adhesion);GO:0044011(single-species biofilm formation on inanimate substrate);GO:0044407(single-species biofilm formation in or on host organism);GO:0046557(glucan endo…	00500(Starch and sucrose metabolism)	K01210	EC:3.2.1.58	23.49	25.41	27.51	37.49	35.7	35.88	2.71	2.31	2.43	3.94	4.8	3.56	2.8	2.5	2.72	0	0
Bv4_078280_ymnd	black	170.409	PREDICTED: protein DELAY OF GERMINATION 1 [Beta vulgaris subsp. vulgaris]	GO:0005634(nucleus);GO:0006351(transcription, DNA-templated);GO:0043565(sequence-specific DNA binding);GO:0080167(response to karrikin)	04075(Plant hormone signal transduction)	K14431	NA	1.14	1.52	1.48	1.97	2.07	2.13	0.05	0.01	0.03	0	0.05	0.03	0	0.04	0.02	4.17584e-97	5.25088e-96
Bv1_016970_hyqs	black	169.251	hypothetical protein BVRB_1g016970 [Beta vulgaris subsp. vulgaris]	NA	NA	NA	NA	61.28	62.35	59.51	93.78	89.4	86.31	6.63	5.77	4.47	14.39	14.37	13.78	6.49	4.37	7.17	0	0
Bv3_065250_doxn	black	169.065	PREDICTED: xyloglucan endotransglucosylase/hydrolase 2 [Beta vulgaris subsp. vulgaris]	GO:0005576(extracellular region);GO:0005618(cell wall);GO:0010411(xyloglucan metabolic process);GO:0016762(xyloglucan:xyloglucosyl transferase activity);GO:0016798(hydrolase activity, acting on glycosyl bonds);GO:0033946(xyloglucan-specific endo-beta-1,4-glucanase activity);GO:0042546(cell wall biogenesis);GO:0048046(apoplast);GO:0071555(cell wall organization)	NA	NA	NA	56.97	68.32	68.37	93.35	93.39	95.96	16.84	18.39	14.38	25.98	22.14	20.93	15.15	12.81	14.57	1.12799e-217	4.14226e-216
Bv4_072060_ptmd	black	168.769	PREDICTED: linoleate 13S-lipoxygenase 2-1, chloroplastic [Beta vulgaris subsp. vulgaris]	GO:0016165(linoleate 13S-lipoxygenase activity)	00591(Linoleic acid metabolism);00592(alpha-Linolenic acid metabolism)	K00454	EC:1.13.11.12	126.25	132.07	135.73	180.95	182.23	181.19	37.49	38.28	35.7	53.66	56.29	56.31	37.4	39.96	36.43	2.5928e-230	1.07007e-228
Bv4_076510_jyhw	black	167.975	PREDICTED: dnaJ homolog subfamily B member 3 [Beta vulgaris subsp. vulgaris]	GO:0005737(cytoplasm);GO:0006457(protein folding)	NA	NA	NA	21.02	22.51	21.87	5.82	5.95	5.39	50.8	53.73	51.74	47.07	46.68	49.81	44.38	43.74	43.93	0	0
Bv3_052810_dqmi	black	167.411	PREDICTED: acidic endochitinase [Beta vulgaris subsp. vulgaris]	GO:0004568(chitinase activity);GO:0005576(extracellular region);GO:0006032(chitin catabolic process);GO:0008061(chitin binding)	00520(Amino sugar and nucleotide sugar metabolism)	K01183	EC:3.2.1.14	165.01	190.13	188.49	254.42	264.57	263.86	27.48	28.09	24.25	58.22	59.31	60.87	28.24	27.87	28.22	0	0
Bv6_138980_ctxx	black	167.058	PREDICTED: 14-3-3-like protein GF14 kappa [Beta vulgaris subsp. vulgaris]	GO:0005515(protein binding);GO:0005524(ATP binding);GO:0005618(cell wall);GO:0005634(nucleus);GO:0005737(cytoplasm);GO:0005739(mitochondrion);GO:0005773(vacuole);GO:0005794(Golgi apparatus);GO:0005829(cytosol);GO:0005886(plasma membrane);GO:0006995(cellular response to nitrogen starvation);GO:0009409(response to cold);GO:0009506(plasmodesma);GO:0009507(chloroplast);GO:0009631(cold acclimation);GO…	NA	NA	NA	983.97	1107.9	1166.56	1440.87	1437.59	1446.58	451.98	442.34	451.89	398.29	373.78	407.6	375.49	350.4	356.77	2.90259e-74	2.66884e-73
Bv5_101260_mcuq	black	166.865	PREDICTED: pto-interacting protein 1 [Beta vulgaris subsp. vulgaris]	GO:0005524(ATP binding);GO:0005886(plasma membrane);GO:0006468(protein phosphorylation);GO:0016301(kinase activity)	04626(Plant-pathogen interaction)	K13436	EC:2.7.11.1	62.28	66.77	70.75	88.25	85.02	86.37	17.91	18.42	19.38	29.38	24.52	27.67	24.87	21.01	21.61	3.08947e-230	1.27213e-228
Bv7_163520_xfto	black	166.565	PREDICTED: pectinesterase [Beta vulgaris subsp. vulgaris]	GO:0030599(pectinesterase activity);GO:0046910(pectinesterase inhibitor activity);GO:0071944(cell periphery)	00040(Pentose and glucuronate interconversions)	K01051	EC:3.1.1.11	5.46	7.62	5.73	9.62	9.83	9.36	1.96	2.43	2.07	1.59	2.16	2.36	2.08	2.63	2.33	1.97885e-45	1.07058e-44
Bv2_040670_dwzn	black	166.288	hypothetical protein BVRB_2g040670 [Beta vulgaris subsp. vulgaris]	GO:0000304(response to singlet oxygen);GO:0005524(ATP binding);GO:0005783(endoplasmic reticulum);GO:0005886(plasma membrane);GO:0009737(response to abscisic acid);GO:0016021(integral component of membrane);GO:0016787(hydrolase activity);GO:0016887(ATPase activity)	NA	NA	NA	1.98	2.65	2.1	4.05	3.86	3.45	0.69	0.56	0.7	0.71	0.54	0.52	0.73	0.7	0.68	2.30116e-111	3.46793e-110
Bv8_199760_djrd	black	165.691	PREDICTED: probable ADP-ribosylation factor GTPase-activating protein AGD5 [Beta vulgaris subsp. vulgaris]	GO:0003677(DNA binding);GO:0005096(GTPase activator activity);GO:0005634(nucleus);GO:0005768(endosome);GO:0005802(trans-Golgi network);GO:0005829(cytosol);GO:0010227(floral organ abscission);GO:0016192(vesicle-mediated transport);GO:0046872(metal ion binding);GO:0090630(activation of GTPase activity)	04144(Endocytosis)	K12486	NA	20.53	23.87	25	41.51	37.55	36.34	9.76	9.24	8.42	9.24	7.65	8.96	10.68	9.52	10.59	6.08708e-103	8.32302e-102
Bv8_197790_tgad	black	165.643	PREDICTED: acid phosphatase 1-like [Beta vulgaris subsp. vulgaris]	GO:0003993(acid phosphatase activity);GO:0005576(extracellular region);GO:0005773(vacuole);GO:0005774(vacuolar membrane);GO:0005829(cytosol)	03010(Ribosome)	K02866	NA	101.33	103.48	94.06	133.61	139.14	131.92	32.37	35.03	41.27	29.1	26.77	26.37	31.21	30.9	28.04	2.16695e-234	9.15309e-233
Bv9_226100_xctz	black	165.48	DNA damage-binding protein 1 [Spinacia oleracea]	GO:0003684(damaged DNA binding);GO:0005634(nucleus);GO:0006289(nucleotide-excision repair);GO:0031461(cullin-RING ubiquitin ligase complex);GO:0043161(proteasome-mediated ubiquitin-dependent protein catabolic process)	04120(Ubiquitin mediated proteolysis);03420(Nucleotide excision repair)	K10610	NA	178.89	208.74	212.76	283.05	277.54	287.82	108.39	104.49	100.54	84.57	84.45	82.06	114.29	106.03	115.29	1.99704e-125	3.50242e-124
Bv6_133340_zkhw	black	165.344	PREDICTED: ethylene-responsive transcription factor ERF115 [Beta vulgaris subsp. vulgaris]	GO:0003677(DNA binding);GO:0003700(DNA binding transcription factor activity);GO:0005634(nucleus);GO:0006351(transcription, DNA-templated);GO:0006355(regulation of transcription, DNA-templated);GO:0006970(response to osmotic stress);GO:0009737(response to abscisic acid);GO:0009738(abscisic acid-activated signaling pathway);GO:0009749(response to glucose);GO:0009788(negative regulation of abscisic…	03040(Spliceosome)	K12900	NA	8.39	8.51	5.76	14.98	13.93	14.23	0.72	0.78	0.5	0.66	1.06	0.95	0.96	0.92	1.12	1.30833e-128	2.38039e-127
Bv_009200_sruu	black	165.289	PREDICTED: quinolinate synthase, chloroplastic [Beta vulgaris subsp. vulgaris]	GO:0008047(enzyme activator activity);GO:0008987(quinolinate synthetase A activity);GO:0009060(aerobic respiration);GO:0009435(NAD biosynthetic process);GO:0009507(chloroplast);GO:0016226(iron-sulfur cluster assembly);GO:0016740(transferase activity);GO:0034628('de novo' NAD biosynthetic process from aspartate);GO:0042803(protein homodimerization activity);GO:0046872(metal ion binding);GO:0051176…	00760(Nicotinate and nicotinamide metabolism)	K03517	EC:2.5.1.72	132.76	153.03	146.57	210.41	222.74	204.24	25.99	25.49	25.97	47.23	46.18	47.57	15.7	15.42	17.38	0	0
Bv7_159010_tzwj	black	165.274	PREDICTED: NAC domain-containing protein 90 [Beta vulgaris subsp. vulgaris]	GO:0003677(DNA binding);GO:0003700(DNA binding transcription factor activity);GO:0005515(protein binding);GO:0005634(nucleus);GO:0006351(transcription, DNA-templated);GO:0006355(regulation of transcription, DNA-templated);GO:0007275(multicellular organism development)	03013(RNA transport);03015(mRNA surveillance pathway);03018(RNA degradation)	K13126	NA	8.45	8.03	8.67	11.91	11.18	12.11	1.64	1.95	1.68	1.98	1.69	1.36	0.94	0.92	1.24	4.24898e-130	7.85778e-129
Bv5_102190_xsxs	black	164.419	PREDICTED: 20 kDa chaperonin, chloroplastic-like [Beta vulgaris subsp. vulgaris]	GO:0005759(mitochondrial matrix);GO:0006986(response to unfolded protein);GO:0009507(chloroplast);GO:0046872(metal ion binding);GO:0051082(unfolded protein binding);GO:0051085(chaperone cofactor-dependent protein refolding);GO:0051087(chaperone binding)	NA	NA	NA	29.31	30.96	31.71	38.52	38.94	39.22	7.75	7.28	8.26	11.11	14.03	13.05	11.28	12.21	11.97	1.95296e-158	4.74245e-157
Bv7_179180_rkjz	black	164.221	PREDICTED: alpha carbonic anhydrase 7 [Beta vulgaris subsp. vulgaris]	GO:0004089(carbonate dehydratase activity);GO:0006730(one-carbon metabolic process);GO:0008270(zinc ion binding);GO:0009507(chloroplast);GO:0009570(chloroplast stroma)	00910(Nitrogen metabolism)	K01674	EC:4.2.1.1	7.03	7.32	7.72	9.25	10.36	10.78	0.48	0.59	0.41	0.39	0.28	0.82	1.75	1.14	2.04	2.62498e-85	2.80987e-84
Bv1_023220_cwwd	black	164.062	PREDICTED: petal death protein [Beta vulgaris subsp. vulgaris]	GO:0003824(catalytic activity);GO:0004451(isocitrate lyase activity);GO:0008152(metabolic process);GO:0009507(chloroplast);GO:0009570(chloroplast stroma)	NA	NA	NA	213.88	244.13	238.49	313.4	312.16	314.27	37.91	37.92	35.93	20.2	21.65	21.28	11.43	10.94	11.83	0	0
Bv6_130230_uacs	black	163.566	PREDICTED: ubiquitin-conjugating enzyme E2-17 kDa [Beta vulgaris subsp. vulgaris]	GO:0004842(ubiquitin-protein transferase activity);GO:0016567(protein ubiquitination)	04141(Protein processing in endoplasmic reticulum);04120(Ubiquitin mediated proteolysis)	K06689	EC:2.3.2.23	86.1	96.58	101.95	186.74	194.28	194.96	20.62	18.7	19.85	11.38	10.61	11.64	2.94	1.97	3.21	0	0
Bv4_076460_gaih	black	163.328	hypothetical protein BVRB_4g076460 isoform A [Beta vulgaris subsp. vulgaris];hypothetical protein BVRB_4g076460 isoform B [Beta vulgaris subsp. vulgaris]	NA	NA	NA	NA	24.36	28.47	29.39	41.63	44.98	40.18	9.57	10.95	9.89	7.46	10.16	10.84	5.49	6.24	6.3	3.58391e-112	5.49778e-111
Bv5_117900_mnku	black	162.885	hypothetical protein BVRB_5g117900 isoform A [Beta vulgaris subsp. vulgaris];hypothetical protein BVRB_5g117900 isoform B [Beta vulgaris subsp. vulgaris]	NA	NA	NA	NA	7.37	7.8	7.45	10.79	10.35	11.68	1.44	1.5	1.91	2.14	1.73	1.31	3.62	3.26	2.91	2.5663e-64	1.98274e-63
Bv3_055610_pwaq	black	162.825	PREDICTED: uncharacterized protein LOC109134612 [Beta vulgaris subsp. vulgaris]	NA	NA	NA	NA	4.17	4.18	3.97	8.69	8.01	6.81	0.52	0.34	0.74	0.7	0.96	0.29	0.41	0.35	0.36	3.03992e-65	2.38035e-64
Bv2_028010_uejs	black	162.605	PREDICTED: protein COBRA [Beta vulgaris subsp. vulgaris]	GO:0003674(molecular_function);GO:0005886(plasma membrane);GO:0009505(plant-type cell wall);GO:0009651(response to salt stress);GO:0009825(multidimensional cell growth);GO:0009897(external side of plasma membrane);GO:0009930(longitudinal side of cell surface);GO:0010215(cellulose microfibril organization);GO:0016021(integral component of membrane);GO:0016049(cell growth);GO:0016328(lateral plasma…	NA	NA	NA	4.6	4.35	4.17	7.37	6.15	6.39	0.83	0.28	0.54	0.35	0.85	1.07	0.16	0.52	0.16	5.78072e-39	2.73497e-38
Bv7_165270_uswn	black	162.438	hypothetical protein BVRB_7g165270 [Beta vulgaris subsp. vulgaris]	GO:0005759(mitochondrial matrix);GO:0006986(response to unfolded protein);GO:0009507(chloroplast);GO:0046872(metal ion binding);GO:0051082(unfolded protein binding);GO:0051085(chaperone cofactor-dependent protein refolding);GO:0051087(chaperone binding)	NA	NA	NA	1.29	1.57	1.46	1.75	2.37	2.36	0	0	0	0	0	0.06	0	0	0	2.70702e-47	1.52744e-46
Bv3_052480_tozd	black	162.26	PREDICTED: transcription factor SPEECHLESS [Beta vulgaris subsp. vulgaris]	GO:0003677(DNA binding);GO:0003700(DNA binding transcription factor activity);GO:0005634(nucleus);GO:0006351(transcription, DNA-templated);GO:0006355(regulation of transcription, DNA-templated);GO:0010374(stomatal complex development);GO:0046983(protein dimerization activity)	04016(MAPK signaling pathway - plant)	K20558	NA	1.68	2.37	2.3	3.14	3.68	3.02	0.12	0.11	0.13	0.57	0.16	0.26	0.38	0.76	0.51	9.85632e-30	3.67346e-29
Bv5_125320_knac	black	162.186	PREDICTED: myb-like protein Q [Beta vulgaris subsp. vulgaris]	GO:0000981(RNA polymerase II transcription factor activity, sequence-specific DNA binding);GO:0001135(transcription factor activity, RNA polymerase II transcription factor recruiting);GO:0003677(DNA binding);GO:0003700(DNA binding transcription factor activity);GO:0005515(protein binding);GO:0005634(nucleus);GO:0006351(transcription, DNA-templated);GO:0006355(regulation of transcription, DNA-temp…	NA	NA	NA	9.12	9.87	9.47	15.97	16.04	14.64	2.74	2.05	2.11	2.7	3.04	2.64	0.39	0.63	0.58	1.41486e-242	6.36474e-241
Bv1_015710_pnwg	black	162.017	PREDICTED: probable inactive receptor kinase At5g67200 [Beta vulgaris subsp. vulgaris]	GO:0004672(protein kinase activity);GO:0004674(protein serine/threonine kinase activity);GO:0005524(ATP binding);GO:0005886(plasma membrane);GO:0006468(protein phosphorylation);GO:0007169(transmembrane receptor protein tyrosine kinase signaling pathway);GO:0016021(integral component of membrane);GO:0016301(kinase activity);GO:0016310(phosphorylation)	NA	NA	NA	2.44	2.98	3.17	3.76	3.98	3.66	0.53	0.86	0.66	1.18	0.99	1.19	1.32	1.01	1.21	1.27941e-59	9.09228e-59
Bv_002620_tqpy	black	161.324	PREDICTED: glycine-rich RNA-binding protein-like [Beta vulgaris subsp. vulgaris]	GO:0000380(alternative mRNA splicing, via spliceosome);GO:0003690(double-stranded DNA binding);GO:0003697(single-stranded DNA binding);GO:0003723(RNA binding);GO:0003729(mRNA binding);GO:0005515(protein binding);GO:0005634(nucleus);GO:0005737(cytoplasm);GO:0005739(mitochondrion);GO:0005777(peroxisome);GO:0005829(cytosol);GO:0006406(mRNA export from nucleus);GO:0006970(response to osmotic stress);…	NA	NA	NA	1.75	1.46	1.66	3.49	3.34	3.34	0.13	0.29	0	0.41	0.4	0.17	0.25	0.11	0.53	1.71146e-19	4.59231e-19
Bv8_190040_dzmo	black	161.172	PREDICTED: endochitinase EP3 [Beta vulgaris subsp. vulgaris]	GO:0000272(polysaccharide catabolic process);GO:0004568(chitinase activity);GO:0005576(extracellular region);GO:0005618(cell wall);GO:0006032(chitin catabolic process);GO:0006952(defense response);GO:0008061(chitin binding);GO:0009611(response to wounding);GO:0009617(response to bacterium);GO:0009626(plant-type hypersensitive response);GO:0010262(somatic embryogenesis);GO:0016998(cell wall macrom…	00520(Amino sugar and nucleotide sugar metabolism)	K01183	EC:3.2.1.14	11.1	10.48	10.35	17.83	18.96	19.6	0.73	0.64	1.18	2.94	4	3.17	4.27	4.82	3.61	1.56873e-87	1.7403e-86
Bv2_024080_gqok	black	160.365	hypothetical protein BVRB_2g024080 [Beta vulgaris subsp. vulgaris]	GO:0005886(plasma membrane);GO:0005887(integral component of plasma membrane);GO:0006810(transport);GO:0006833(water transport);GO:0009414(response to water deprivation);GO:0015250(water channel activity);GO:0015267(channel activity);GO:0016020(membrane);GO:0016021(integral component of membrane);GO:0034220(ion transmembrane transport);GO:0055085(transmembrane transport)	NA	NA	NA	2865.27	3259.32	3335.07	3906.43	3906.46	4033.64	1444.35	1411.59	1442.87	1403.07	1378.41	1397.72	2040.68	1729.08	1930.28	9.0318e-20	2.45015e-19
Bv2_032760_rmmt	black	159.638	PREDICTED: amino acid permease 8 [Beta vulgaris subsp. vulgaris]	GO:0003333(amino acid transmembrane transport);GO:0005886(plasma membrane);GO:0015171(amino acid transmembrane transporter activity)	NA	NA	NA	5.7	6.52	6.4	8.27	9.99	7.97	0.8	0.86	0.97	2.46	1.61	2.26	1.7	1.34	1.17	8.42262e-71	7.23766e-70
Bv7_168020_ayqg	black	159.241	PREDICTED: UPF0481 protein At3g47200-like [Beta vulgaris subsp. vulgaris]	GO:0003674(molecular_function);GO:0005886(plasma membrane);GO:0008150(biological_process);GO:0016021(integral component of membrane)	NA	NA	NA	11.95	11.77	11.99	22.12	21.96	20.98	4.61	4.85	5.81	5.08	4.96	4.68	3.7	4.48	3.33	1.93419e-95	2.36922e-94
Bv8_186610_hfuo	black	159.129	PREDICTED: (3S,6E)-nerolidol synthase 1-like isoform X1 [Beta vulgaris subsp. vulgaris]	GO:0000287(magnesium ion binding);GO:0008152(metabolic process);GO:0009507(chloroplast);GO:0010333(terpene synthase activity);GO:0016114(terpenoid biosynthetic process);GO:0034007(S-linalool synthase activity);GO:0043693(monoterpene biosynthetic process)	00909(Sesquiterpenoid and triterpenoid biosynthesis)	K14175	EC:4.2.3.48	6.11	7.2	7.32	14.78	12.06	11.78	1.78	1.42	1.07	0.63	0.91	0.77	0.2	0.11	0.25	1.59392e-129	2.92663e-128
Bv7_172800_uqiw	black	159.019	PREDICTED: alpha-glucan phosphorylase, H isozyme [Beta vulgaris subsp. vulgaris]	GO:0005737(cytoplasm);GO:0005980(glycogen catabolic process);GO:0008184(glycogen phosphorylase activity);GO:0030170(pyridoxal phosphate binding)	00500(Starch and sucrose metabolism)	K00688	EC:2.4.1.1	387.15	430.88	431.3	248.57	262.93	256.14	914.54	926.4	894.08	865.41	840.29	854.72	870.3	763.48	794.54	1.3974e-27	4.88817e-27
Bv3_068430_nkex	black	158.952	PREDICTED: superoxide dismutase [Cu-Zn] 2 [Beta vulgaris subsp. vulgaris];hypothetical protein BVRB_3g068430 isoform B [Beta vulgaris subsp. vulgaris]	GO:0004784(superoxide dismutase activity);GO:0005507(copper ion binding);GO:0005737(cytoplasm);GO:0008270(zinc ion binding);GO:0019430(removal of superoxide radicals);GO:0019430(removal of superoxide radicals)	04146(Peroxisome);04146(Peroxisome)	K04565	EC:1.15.1.1	7.07	7.34	7.8	9.2	8.49	8.7	2.96	2.83	2.61	3.74	3.7	3.12	3.02	2.83	3.47	1.44386e-67	1.17136e-66
Bv1_010980_ftdh	black	158.675	hypothetical protein BVRB_1g010980 [Beta vulgaris subsp. vulgaris]	GO:0005886(plasma membrane);GO:0016021(integral component of membrane);GO:0042626(ATPase activity, coupled to transmembrane movement of substances)	02010(ABC transporters)	K05681	NA	3.21	3.37	3.8	4.1	4.66	4.47	0.37	0	0	0	0.19	0	0.23	0	0	1.03724e-08	1.68783e-08
Bv_008290_khfz	black	158.431	PREDICTED: ammonium transporter 3 member 3 [Beta vulgaris subsp. vulgaris]	GO:0005887(integral component of plasma membrane);GO:0008519(ammonium transmembrane transporter activity);GO:0015695(organic cation transport);GO:0019740(nitrogen utilization);GO:0072488(ammonium transmembrane transport)	NA	NA	NA	42.48	49.33	54.54	99.5	100.52	105.18	12.38	12.29	12.22	7.86	8.04	9.63	17.88	17.07	20.3	0	0
Bv4_080640_nnrr	black	158.406	PREDICTED: kunitz-type trypsin inhibitor alpha chain [Beta vulgaris subsp. vulgaris]	NA	NA	NA	NA	61.25	69.42	66.74	79.08	80.15	79.5	3.82	4.18	3.51	11.03	11.55	11.38	7.49	6.67	7.23	0	0
Bv9_223350_epeu	black	158.358	PREDICTED: uncharacterized acetyltransferase At3g50280 [Beta vulgaris subsp. vulgaris]	GO:0005737(cytoplasm);GO:0005829(cytosol);GO:0016740(transferase activity);GO:0016747(transferase activity, transferring acyl groups other than amino-acyl groups)	NA	NA	NA	9.35	10.4	9.45	13.31	15.83	14.41	4.4	3.39	3.7	2.56	2.61	2.27	1.86	1.71	3.23	8.35503e-51	5.03653e-50
Bv2_026210_ifdq	black	158.325	PREDICTED: endo-1,3(4)-beta-glucanase 2 [Beta vulgaris subsp. vulgaris]	NA	NA	NA	NA	53.06	59.65	56.56	73.89	80.44	75.79	29.42	27.09	28.96	34.31	35.27	35.55	24.86	22.89	25.8	1.92677e-137	3.84371e-136
Bv4_074500_xenn	black	158.231	PREDICTED: endoglucanase 12 [Beta vulgaris subsp. vulgaris]	GO:0004553(hydrolase activity, hydrolyzing O-glycosyl compounds);GO:0005886(plasma membrane);GO:0008810(cellulase activity);GO:0016021(integral component of membrane);GO:0030245(cellulose catabolic process);GO:0071555(cell wall organization)	00500(Starch and sucrose metabolism)	K01179	EC:3.2.1.4	8.75	10.8	11.96	13.4	13.15	13.56	2	1.75	1.7	2.71	1.47	1.9	1.19	1.16	1.44	5.81387e-103	7.95549e-102
Bv3_048640_keji	black	158.001	PREDICTED: peroxisomal membrane protein PMP22 [Beta vulgaris subsp. vulgaris]	GO:0003674(molecular_function);GO:0005739(mitochondrion);GO:0008150(biological_process)	04146(Peroxisome)	K13347	NA	4.61	3.96	4.62	7.31	7.52	7.19	1.3	1.23	1.53	2.37	2.63	2.18	1.93	2.18	1.83	5.01305e-55	3.27066e-54
Bv2_025270_morf	black	157.866	hypothetical protein BVRB_2g025270 [Beta vulgaris subsp. vulgaris]	GO:0002229(defense response to oomycetes);GO:0004674(protein serine/threonine kinase activity);GO:0005524(ATP binding);GO:0005886(plasma membrane);GO:0006468(protein phosphorylation);GO:0016021(integral component of membrane);GO:0016301(kinase activity);GO:0030246(carbohydrate binding);GO:0042742(defense response to bacterium)	NA	NA	NA	7.98	10.31	7.82	12.96	11.99	11.55	4.47	4.59	4.52	3.98	3.41	4.19	5.01	4.65	4.79	3.18015e-49	1.8725e-48
Bv3_065210_izir	black	157.82	PREDICTED: xyloglucan endotransglucosylase/hydrolase protein 24-like [Beta vulgaris subsp. vulgaris]	GO:0004553(hydrolase activity, hydrolyzing O-glycosyl compounds);GO:0005576(extracellular region);GO:0005618(cell wall);GO:0010411(xyloglucan metabolic process);GO:0016762(xyloglucan:xyloglucosyl transferase activity);GO:0016798(hydrolase activity, acting on glycosyl bonds);GO:0042546(cell wall biogenesis);GO:0048046(apoplast);GO:0071555(cell wall organization)	NA	NA	NA	345.56	404.89	371.12	452.84	444.97	403.64	169.56	178.07	148.21	170.75	172.51	158.51	168.85	154.45	164.31	3.49089e-56	2.33167e-55
Bv8_187350_jzap	black	157.818	PREDICTED: NEDD8-specific protease 1 [Beta vulgaris subsp. vulgaris]	GO:0005634(nucleus);GO:0006508(proteolysis);GO:0008234(cysteine-type peptidase activity);GO:0019784(NEDD8-specific protease activity)	NA	NA	NA	4.1	4.25	4.62	5.82	6.96	6.27	1.12	0.96	1.21	1.68	1.91	1.93	0.79	0.71	1.73	1.35846e-26	4.61819e-26
Bv7_163350_ryod	black	157.536	PREDICTED: ethylene-responsive transcription factor ERF073 [Beta vulgaris subsp. vulgaris]	GO:0003677(DNA binding);GO:0003700(DNA binding transcription factor activity);GO:0005515(protein binding);GO:0005634(nucleus);GO:0005737(cytoplasm);GO:0005886(plasma membrane);GO:0006351(transcription, DNA-templated);GO:0006355(regulation of transcription, DNA-templated);GO:0008219(cell death);GO:0009723(response to ethylene);GO:0009735(response to cytokinin);GO:0009753(response to jasmonic acid)…	NA	NA	NA	64.01	72.01	71.12	141.19	130.83	137.16	22.19	22.74	29.05	25.02	31.03	24.31	15.03	20.33	18.62	6.90153e-143	1.44739e-141
Bv1_012610_zpzk	black	157.291	PREDICTED: 12-oxophytodienoate reductase 2 [Beta vulgaris subsp. vulgaris]	GO:0003959(NADPH dehydrogenase activity);GO:0005622(intracellular);GO:0055114(oxidation-reduction process)	00592(alpha-Linolenic acid metabolism)	K05894	EC:1.3.1.42	47.87	57.14	52.09	83.13	80.83	78.87	17.58	18.58	20.66	23.91	24.26	25.63	11.27	9.65	10.69	9e-297	6e-295
Bv9_213210_mfea	black	156.713	PREDICTED: L-ascorbate oxidase homolog [Beta vulgaris subsp. vulgaris]	GO:0005507(copper ion binding);GO:0009505(plant-type cell wall);GO:0009506(plasmodesma);GO:0016722(oxidoreductase activity, oxidizing metal ions)	NA	NA	NA	40.45	45.09	43.58	51.29	52.07	53.16	23.29	21.88	19.12	24.92	24.75	30.76	28.34	26.96	26.26	1.58731e-36	7.01599e-36
Bv2_032790_cfze	black	156.229	PREDICTED: uncharacterized protein LOC104885827 [Beta vulgaris subsp. vulgaris]	GO:0004674(protein serine/threonine kinase activity);GO:0005524(ATP binding);GO:0005886(plasma membrane);GO:0006468(protein phosphorylation);GO:0016020(membrane);GO:0016021(integral component of membrane);GO:0016301(kinase activity)	NA	NA	NA	6.28	7.68	7.43	10.17	12.15	13.19	1.79	1.77	2.03	3.14	2.89	2.81	2.92	3.69	3.21	5.03757e-62	3.72263e-61
Bv8_188990_ghuf	black	155.711	hypothetical protein BVRB_8g188990 [Beta vulgaris subsp. vulgaris]	GO:0001653(peptide receptor activity);GO:0004383(guanylate cyclase activity);GO:0004672(protein kinase activity);GO:0004674(protein serine/threonine kinase activity);GO:0005515(protein binding);GO:0005524(ATP binding);GO:0005886(plasma membrane);GO:0006468(protein phosphorylation);GO:0006955(immune response);GO:0007169(transmembrane receptor protein tyrosine kinase signaling pathway);GO:0009506(p…	04016(MAPK signaling pathway - plant)	K20718	EC:2.7.11.1	31.56	33.1	33.8	66	58.63	55.03	9.72	9.24	10.95	16.41	17.16	17.4	15.95	12.09	12.61	3.17879e-123	5.44753e-122
Bv6_138300_zanw	black	155.402	hypothetical protein BVRB_6g138300 isoform B [Beta vulgaris subsp. vulgaris];PREDICTED: receptor kinase-like protein Xa21 isoform X2 [Beta vulgaris subsp. vulgaris]	GO:0005515(protein binding);GO:0005515(protein binding)	NA	NA	NA	17.04	17.08	16.36	20.69	21.02	20.75	3.26	3.5	3.34	2.41	2.19	1.74	1.36	1.23	1.51	0	0
Bv4_082450_icng	black	155.313	PREDICTED: probable aminopyrimidine aminohydrolase, mitochondrial isoform X1 [Beta vulgaris subsp. vulgaris]	GO:0005739(mitochondrion);GO:0005829(cytosol);GO:0009228(thiamine biosynthetic process);GO:0009507(chloroplast);GO:0042131(thiamine phosphate phosphatase activity)	NA	NA	NA	11.72	12.4	14.14	30.32	30.55	28.37	2.82	2.87	2.87	1.59	1.49	0.96	0.18	0.09	0.31	0	0
Bv6_149890_jqmg	black	154.738	PREDICTED: protein TIFY 9 [Beta vulgaris subsp. vulgaris]	GO:0003714(transcription corepressor activity);GO:0005515(protein binding);GO:0005634(nucleus);GO:0006351(transcription, DNA-templated);GO:0006355(regulation of transcription, DNA-templated);GO:0006952(defense response);GO:0009611(response to wounding);GO:0009733(response to auxin);GO:0009751(response to salicylic acid);GO:0009753(response to jasmonic acid);GO:0010112(regulation of systemic acqui…	04075(Plant hormone signal transduction)	K13464	NA	8.7	8.41	9.77	21.99	19.96	19.73	1.51	1.76	2.26	2.48	2.03	2.25	2.52	2.33	2.4	6.47786e-227	2.57882e-225
Bv3_061760_mzsz	black	154.642	PREDICTED: zeatin O-glucosyltransferase [Beta vulgaris subsp. vulgaris]	GO:0008194(UDP-glycosyltransferase activity);GO:0009813(flavonoid biosynthetic process);GO:0043231(intracellular membrane-bounded organelle);GO:0052696(flavonoid glucuronidation)	00908(Zeatin biosynthesis)	K13495	EC:2.4.1.215	2.98	3.01	4.08	7.67	6.22	6.32	0.99	0.58	0.65	0.6	0.72	0.73	0.41	0.55	0.48	5.1316e-70	4.35762e-69
Bv4_073320_tcog	black	154.085	PREDICTED: hexokinase-3 [Beta vulgaris subsp. vulgaris]	GO:0001678(cellular glucose homeostasis);GO:0004340(glucokinase activity);GO:0005829(cytosol);GO:0006096(glycolytic process);GO:0008865(fructokinase activity);GO:0019158(mannokinase activity)	00010(Glycolysis / Gluconeogenesis);00051(Fructose and mannose metabolism);00052(Galactose metabolism);00500(Starch and sucrose metabolism);00520(Amino sugar and nucleotide sugar metabolism);00524(Neomycin, kanamycin and gentamicin biosynthesis)	K00844	EC:2.7.1.1	42.34	46.81	48.99	92.82	98.19	90.5	12.05	9.8	9.71	22.79	23.46	20.24	21.38	20.77	21.98	4.63462e-271	2.51949e-269
Bv7_180530_igym	black	154.062	PREDICTED: uncharacterized protein LOC104908997 isoform X1 [Beta vulgaris subsp. vulgaris];PREDICTED: uncharacterized protein LOC104908997 isoform X2 [Beta vulgaris subsp. vulgaris]	GO:0005739(mitochondrion);GO:0005739(mitochondrion)	NA	NA	NA	40.15	46.48	38.93	88.81	84.34	77.4	15.65	17.55	13.06	15.12	18.09	16.76	15.87	21.23	20.71	2.13688e-99	2.78228e-98
Bv2_044930_mcyf	black	153.895	PREDICTED: uncharacterized protein LOC104905992 [Beta vulgaris subsp. vulgaris]	GO:0004674(protein serine/threonine kinase activity);GO:0005886(plasma membrane);GO:0007166(cell surface receptor signaling pathway)	NA	NA	NA	47.73	54.24	53.49	84.75	85.33	78.36	31.61	31.06	28.19	31.43	30.65	30.98	24.77	21.73	22.24	1.49246e-148	3.31547e-147
Bv3_054160_ywua	black	153.824	PREDICTED: inactive protein RESTRICTED TEV MOVEMENT 1 [Beta vulgaris subsp. vulgaris]	NA	NA	NA	NA	15.41	16.78	16.53	21.11	21.43	19.1	7.93	8.05	7.67	11.04	10.91	10.61	11.1	10.5	11.03	5.45693e-68	4.46124e-67
Bv3_068810_ffky	black	153.579	PREDICTED: dirigent protein 21 [Beta vulgaris subsp. vulgaris]	GO:0009699(phenylpropanoid biosynthetic process);GO:0042349(guiding stereospecific synthesis activity)	00970(Aminoacyl-tRNA biosynthesis)	K01870	EC:6.1.1.5	26.77	38.29	35.57	41.57	42.83	39.55	16.3	16.82	14.99	15.27	17.38	14.24	19.73	17.61	19.17	1.51775e-39	7.28862e-39
Bv9_225160_uuxs	black	153.445	PREDICTED: glucan endo-1,3-beta-glucosidase 1 isoform X1 [Beta vulgaris subsp. vulgaris];PREDICTED: glucan endo-1,3-beta-glucosidase 1 isoform X2 [Beta vulgaris subsp. vulgaris]	GO:0004553(hydrolase activity, hydrolyzing O-glycosyl compounds);GO:0030247(polysaccharide binding);GO:0046658(anchored component of plasma membrane);GO:0046658(anchored component of plasma membrane)	00500(Starch and sucrose metabolism);00500(Starch and sucrose metabolism)	K19891	EC:3.2.1.39	10.74	9.8	10.34	24.06	18.93	18.9	2.69	2.68	1.43	1.12	2.6	0.89	2.32	2.71	1.98	8.17908e-54	5.2208e-53
Bv9_220960_izwt	black	153.364	PREDICTED: dynein light chain 1, cytoplasmic [Beta vulgaris subsp. vulgaris]	GO:0003777(microtubule motor activity);GO:0005737(cytoplasm);GO:0005875(microtubule associated complex);GO:0007017(microtubule-based process);GO:0008574(ATP-dependent microtubule motor activity, plus-end-directed);GO:2000582(positive regulation of ATP-dependent microtubule motor activity, plus-end-directed)	NA	NA	NA	11.48	14.74	11.15	26.04	21	20.38	4.17	4.29	3.61	3.78	4.63	4.49	2.23	3.63	4.05	6.61334e-55	4.31005e-54
Bv3_067590_npqs	black	153.16	PREDICTED: trehalose-phosphate phosphatase A [Beta vulgaris subsp. vulgaris]	GO:0004805(trehalose-phosphatase activity);GO:0005634(nucleus);GO:0005992(trehalose biosynthetic process)	00500(Starch and sucrose metabolism)	K01087	EC:3.1.3.12	27.02	34.21	32.8	65.55	67.45	63.34	10.8	11.87	11.05	13.94	15.79	15.57	10.84	9.64	9.82	6.75627e-280	3.84723e-278
Bv_015850_roze	black	153.132	PREDICTED: uncharacterized protein LOC104885318 [Beta vulgaris subsp. vulgaris]	NA	NA	NA	NA	30.89	33.94	36.23	73.56	67.49	68.34	5.48	6.27	4.86	18.16	15.64	16.09	13.19	10.84	12.47	0	0
Bv3_058180_kpyx	black	152.864	PREDICTED: uncharacterized protein LOC104888972 [Beta vulgaris subsp. vulgaris]	GO:0004674(protein serine/threonine kinase activity);GO:0005886(plasma membrane);GO:0007166(cell surface receptor signaling pathway)	NA	NA	NA	43.78	50.21	49.86	60.09	58.63	62.62	7.91	8.17	8.88	4.67	5.76	5.68	18.53	18.72	18.13	0	0
Bv6_129680_eree	black	152.526	PREDICTED: glutaredoxin-C3 [Beta vulgaris subsp. vulgaris]	GO:0005737(cytoplasm);GO:0005794(Golgi apparatus);GO:0008794(arsenate reductase (glutaredoxin) activity);GO:0009055(electron transfer activity);GO:0015035(protein disulfide oxidoreductase activity);GO:0045454(cell redox homeostasis)	NA	NA	NA	22.49	23.83	26.87	38.8	42.09	44.03	11.65	11.92	10.4	15.01	13.59	13.22	8.84	9.09	9.2	1.73197e-104	2.40285e-103
Bv2_028130_opte	black	152.512	PREDICTED: uncharacterized protein LOC104906998 [Beta vulgaris subsp. vulgaris]	GO:0005829(cytosol);GO:0009817(defense response to fungus, incompatible interaction)	NA	NA	NA	25.13	31.54	27.95	50.84	48.53	49.44	12.55	13.34	11.82	15.3	16.5	17.68	9.56	10.38	8.98	1.7769e-143	3.74837e-142
Bv9_222520_gofj	black	152.238	PREDICTED: cytochrome P450 76AD1-like [Beta vulgaris subsp. vulgaris]	GO:0016020(membrane);GO:0016709(oxidoreductase activity, acting on paired donors, with incorporation or reduction of molecular oxygen, NAD(P)H as one donor, and incorporation of one atom of oxygen);GO:0044550(secondary metabolite biosynthetic process);GO:0044550(secondary metabolite biosynthetic process)	NA	NA	NA	12.42	18.23	13.73	24.07	21.29	23.32	3.95	4.66	2.54	4.35	8.37	5.15	7.43	6.53	8.02	1.46033e-30	5.55543e-30
Bv5_104310_ixam	black	152.216	PREDICTED: soluble inorganic pyrophosphatase 1 isoform X1 [Beta vulgaris subsp. vulgaris]	GO:0000287(magnesium ion binding);GO:0004427(inorganic diphosphatase activity);GO:0005634(nucleus);GO:0005737(cytoplasm);GO:0005829(cytosol);GO:0006796(phosphate-containing compound metabolic process);GO:0016020(membrane);GO:0019915(lipid storage)	00190(Oxidative phosphorylation)	K01507	EC:3.6.1.1	23.88	25.18	28.56	38.26	40.55	39.22	14.15	13.49	14.49	17.25	17.18	18.06	14.32	12.12	11.32	3.66915e-67	2.958e-66
Bv2_023720_ezys	black	151.707	PREDICTED: putative serine/threonine-protein kinase-like protein CCR3 [Beta vulgaris subsp. vulgaris]	GO:0004674(protein serine/threonine kinase activity);GO:0005524(ATP binding);GO:0005886(plasma membrane);GO:0006468(protein phosphorylation);GO:0016021(integral component of membrane);GO:0016301(kinase activity);GO:0042803(protein homodimerization activity)	NA	NA	NA	41.06	42.8	43.22	63.32	57.79	58.11	18.87	19.74	19.5	22.21	22.35	22.79	28.54	31.27	31.18	4.56168e-115	7.22561e-114
Bv5_109881z1456	black	150.544	hypothetical protein BVRB_2g037240 [Beta vulgaris subsp. vulgaris]	NA	NA	NA	NA	7.42	9.07	8.01	10.81	11.04	9.49	0.7	0.89	0.79	2.63	3.7	2.62	1.14	2.05	2.12	1.09322e-58	7.65721e-58
Bv_004480_jgkg	black	150.457	PREDICTED: uncharacterized protein LOC104883913 [Beta vulgaris subsp. vulgaris]	GO:0004791(thioredoxin-disulfide reductase activity);GO:0005829(cytosol);GO:0009860(pollen tube growth);GO:0010183(pollen tube guidance);GO:0045454(cell redox homeostasis);GO:0046686(response to cadmium ion);GO:0047134(protein-disulfide reductase activity);GO:0055114(oxidation-reduction process);GO:0080092(regulation of pollen tube growth)	NA	NA	NA	43.67	55.17	51.28	100.04	103.51	99.75	22.88	21.82	20.93	28.65	28.24	26.5	24	24.17	24.72	3.52578e-228	1.42249e-226
Bv3_058160_mmsd	black	150.093	hypothetical protein BVRB_3g058160 [Beta vulgaris subsp. vulgaris]	GO:0004674(protein serine/threonine kinase activity);GO:0005886(plasma membrane);GO:0007166(cell surface receptor signaling pathway)	NA	NA	NA	1.75	2.16	1.99	2.39	2.17	2.38	0.5	0.39	0.39	0.2	0.28	0.17	0.63	0.52	0.49	7.53188e-94	9.02321e-93
Bv2_029210_mrro	black	149.975	hypothetical protein BVRB_2g029210 [Beta vulgaris subsp. vulgaris]	GO:0003674(molecular_function);GO:0008150(biological_process);GO:0016021(integral component of membrane)	NA	NA	NA	23.41	27.43	25.37	11.69	12.52	11.8	48.47	50.07	47.74	38.61	40.15	37.95	40.71	43.2	45.36	9.65053e-135	1.87731e-133
Bv2_037120_efkg	black	149.824	hypothetical protein BVRB_2g037120 [Beta vulgaris subsp. vulgaris]	NA	NA	NA	NA	37.26	37.05	35.32	46.78	48.03	45.52	13.84	13.18	11.79	21.83	22.99	19.81	15.58	13.53	13.35	7.69702e-137	1.53208e-135
Bv2_023670_uwex	black	149.625	PREDICTED: flavonol synthase/flavanone 3-hydroxylase [Beta vulgaris subsp. vulgaris]	GO:0051213(dioxygenase activity)	00941(Flavonoid biosynthesis)	K05278	EC:1.14.20.6	21	23.21	23.74	45.32	44.11	43.71	2.88	3.36	3.92	12.79	11.79	12.16	3.42	3.67	3.47	0	0
Bv9_218100_aipe	black	149.4	PREDICTED: uncharacterized protein LOC104904416 [Beta vulgaris subsp. vulgaris]	GO:0003674(molecular_function);GO:0005575(cellular_component)	NA	NA	NA	11.89	9.73	11.28	13.4	13.63	15.64	1.8	2.11	2.28	2.52	2.6	1.28	2.92	3.48	5.23	3.18928e-38	1.47831e-37
Bv1_011200_oksw	black	148.476	PREDICTED: berberine bridge enzyme-like 21 [Beta vulgaris subsp. vulgaris]	GO:0005739(mitochondrion);GO:0005773(vacuole);GO:0005829(cytosol);GO:0005886(plasma membrane);GO:0006979(response to oxidative stress);GO:0009055(electron transfer activity);GO:0009505(plant-type cell wall);GO:0009506(plasmodesma);GO:0009507(chloroplast);GO:0016614(oxidoreductase activity, acting on CH-OH group of donors);GO:0031225(anchored component of membrane);GO:0048046(apoplast);GO:0050660(…	00052(Galactose metabolism);00500(Starch and sucrose metabolism)	K01187	EC:3.2.1.20	95.44	108	97.35	44.09	43.12	39.34	152.46	159.44	151.58	140.68	150.97	143.76	124.14	129.19	139.62	1.75299e-47	9.91927e-47
Bv2_032620_eafq	black	148.028	PREDICTED: uncharacterized protein LOC104885641 [Beta vulgaris subsp. vulgaris]	GO:0006629(lipid metabolic process);GO:0016020(membrane);GO:0016298(lipase activity)	00561(Glycerolipid metabolism)	K01054	EC:3.1.1.23	10.19	11.12	12.04	15.36	13.28	14.44	7.03	6.67	7.06	5.41	5.41	5.76	6.64	7.16	7.9	9.02788e-42	4.56827e-41
Bv3_053080_yynm	black	148.004	PREDICTED: protein SGT1 homolog B [Beta vulgaris subsp. vulgaris]	GO:0005515(protein binding);GO:0005634(nucleus);GO:0005737(cytoplasm);GO:0042742(defense response to bacterium);GO:0050832(defense response to fungus)	04626(Plant-pathogen interaction)	K12795	NA	96.84	108.96	110.72	144.05	145.2	147.69	69.62	72.13	72.35	64.09	66.27	66.26	51.81	48.83	51.66	6.35772e-38	2.92137e-37
Bv6_143130_jrau	black	147.83	PREDICTED: zinc finger protein CONSTANS-LIKE 10 [Beta vulgaris subsp. vulgaris]	GO:0003700(DNA binding transcription factor activity);GO:0005622(intracellular);GO:0005634(nucleus);GO:0006355(regulation of transcription, DNA-templated);GO:0008270(zinc ion binding);GO:0016021(integral component of membrane)	04712(Circadian rhythm - plant)	K12135	NA	26.44	26.68	28.68	28.22	29.71	32.34	9.75	9.04	10.4	11.3	10.77	11.56	11.77	11.24	10.38	3.00288e-121	5.03577e-120
Bv3_064290_ipuq	black	147.723	hypothetical protein BVRB_3g064290 [Beta vulgaris subsp. vulgaris]	NA	NA	NA	NA	0.58	0.73	0.68	1.1	1.49	1.59	0.14	0.19	0.04	0	0	0	0	0	0	4.20896e-28	1.50091e-27
Bv9_218850_egrn	black	147.587	hypothetical protein BVRB_9g218850 isoform A [Beta vulgaris subsp. vulgaris];PREDICTED: uncharacterized protein LOC104904486 [Beta vulgaris subsp. vulgaris]	NA	NA	NA	NA	55.81	67.28	67.85	156.78	165.67	159.95	10.9	12.12	13.48	20.83	25.81	24.84	21.23	21.2	21.47	1.38117e-237	5.94562e-236
Bv8_194080_ztyq	black	147.339	PREDICTED: cucumber peeling cupredoxin [Beta vulgaris subsp. vulgaris]	GO:0046658(anchored component of plasma membrane)	NA	NA	NA	799.61	878.75	887.02	1144.1	1147.89	1143.5	441.46	428.69	411.23	579.61	577.75	555.13	375.69	324.61	351.7	1.61005e-26	5.46422e-26
Bv6_127530_kxwm	black	147.223	PREDICTED: uncharacterized protein LOC104894892 isoform X2 [Beta vulgaris subsp. vulgaris]	GO:0003674(molecular_function);GO:0005634(nucleus);GO:0009793(embryo development ending in seed dormancy)	NA	NA	NA	23.89	30.16	26.25	51.32	48.99	46.83	14.54	13.87	11.96	16.87	17.28	14.69	10.12	10.64	10.54	3.00763e-96	3.72209e-95
Bv6_129250_fkxg	black	145.152	hypothetical protein BVRB_6g129250 [Beta vulgaris subsp. vulgaris]	GO:0002237(response to molecule of bacterial origin);GO:0005524(ATP binding);GO:0005739(mitochondrion);GO:0005740(mitochondrial envelope);GO:0005741(mitochondrial outer membrane);GO:0005886(plasma membrane);GO:0008219(cell death);GO:0009411(response to UV);GO:0009617(response to bacterium);GO:0009626(plant-type hypersensitive response);GO:0009863(salicylic acid mediated signaling pathway);GO:0016…	NA	NA	NA	0.84	1.66	1.94	2.82	2.49	3.49	0.12	0	0	0.41	0.17	0.18	0	0	0	4.33815e-35	1.85814e-34
Bv8_201930_mjfy	black	144.982	PREDICTED: (E,E)-alpha-farnesene synthase-like [Beta vulgaris subsp. vulgaris]	GO:0010334(sesquiterpene synthase activity);GO:0051762(sesquiterpene biosynthetic process)	00909(Sesquiterpenoid and triterpenoid biosynthesis)	K14173	EC:4.2.3.46	4.94	5.74	4.57	0.84	1.11	1.34	12.11	10.13	11.91	8.77	9.36	8.56	10.65	11.43	11.89	2.19432e-59	1.55451e-58
Bv5_117860_oncj	black	144.962	hypothetical protein BVRB_5g117860 [Beta vulgaris subsp. vulgaris]	NA	NA	NA	NA	1.51	1.66	1.82	3.07	2.97	3.16	1	0.95	0.97	0.89	0.74	0.8	0.8	0.73	0.5	5.76656e-26	1.92905e-25
Bv3_064820_wrxj	black	144.784	PREDICTED: probable aldo-keto reductase 2 [Beta vulgaris subsp. vulgaris]	GO:0005737(cytoplasm);GO:0005829(cytosol);GO:0016491(oxidoreductase activity);GO:0046686(response to cadmium ion);GO:0055114(oxidation-reduction process)	00750(Vitamin B6 metabolism)	K05275	EC:1.1.1.65	92.23	108.6	106.32	144.46	147.63	145.55	64.63	64.08	65.69	64.64	68.31	67.96	45.57	41.44	47.04	2.17058e-26	7.3306e-26
Bv1_007940_epug	black	144.688	PREDICTED: purine permease 3-like [Beta vulgaris subsp. vulgaris]	GO:0005345(purine nucleobase transmembrane transporter activity);GO:0006863(purine nucleobase transport);GO:0009507(chloroplast);GO:0016020(membrane);GO:0016021(integral component of membrane)	00010(Glycolysis / Gluconeogenesis);00030(Pentose phosphate pathway);00051(Fructose and mannose metabolism);00052(Galactose metabolism);03018(RNA degradation)	K00850	EC:2.7.1.11	6.28	6.3	4.74	9.05	9.06	8.51	1.67	2.5	3.18	1.66	1.59	3.13	3.12	3.36	2.84	2.11167e-19	5.64934e-19
Bv8_191400_nexe	black	144.306	PREDICTED: eukaryotic translation initiation factor [Beta vulgaris subsp. vulgaris]	GO:0003723(RNA binding);GO:0003729(mRNA binding);GO:0003743(translation initiation factor activity);GO:0005634(nucleus);GO:0005737(cytoplasm);GO:0005829(cytosol);GO:0006412(translation);GO:0006413(translational initiation);GO:0006417(regulation of translation)	03013(RNA transport)	K03260	NA	846.96	952.26	963.58	1007.92	1034.8	1019.41	449.53	447.68	466.42	613.09	603.1	584.3	559.1	507.77	527.75	7.57952e-16	1.74899e-15
Bv_003160_zgho	black	143.922	PREDICTED: uncharacterized protein LOC104883743 isoform X2 [Beta vulgaris subsp. vulgaris]	GO:0000462(maturation of SSU-rRNA from tricistronic rRNA transcript (SSU-rRNA, 5.8S rRNA, LSU-rRNA));GO:0005730(nucleolus);GO:0019843(rRNA binding);GO:0032040(small-subunit processome);GO:0070037(rRNA (pseudouridine) methyltransferase activity);GO:0070475(rRNA base methylation)	NA	NA	NA	1.58	2.16	2.29	3.71	2.64	3.81	0.33	0.51	0.23	0.9	0.61	0.6	0.45	0.57	0.9	5.68348e-32	2.25311e-31
Bv9_207880_uruh	black	143.721	PREDICTED: auxin-binding protein ABP19a [Beta vulgaris subsp. vulgaris]	GO:0005618(cell wall);GO:0033609(oxalate metabolic process);GO:0046564(oxalate decarboxylase activity)	NA	NA	NA	14	10.64	14.2	24.9	23.05	24.71	2.05	3.38	2.98	3.95	5.27	4.37	7.67	8.16	7.28	8.25643e-67	6.62355e-66
Bv9_206741z3073	black	143.466	PREDICTED: uncharacterized protein LOC104887328 [Beta vulgaris subsp. vulgaris]	NA	NA	NA	NA	6.66	5.97	5.35	8.34	8.37	6.88	2.06	1.49	2.93	1.24	2.22	1.44	2.01	2.12	3.01	2.77631e-18	7.12246e-18
Bv8_199370_ouqu	black	143.462	PREDICTED: mitogen-activated protein kinase kinase 2 [Beta vulgaris subsp. vulgaris]	GO:0005737(cytoplasm)	04016(MAPK signaling pathway - plant)	K20603	EC:2.7.12.2	167.94	206.47	195.43	208.14	207.92	196.5	66.96	65.51	67.34	86.3	81.8	82.16	83.27	70.68	71.25	2.29297e-139	4.68328e-138
Bv8_183550_haqk	black	142.952	PREDICTED: isoflavone 2'-hydroxylase-like [Beta vulgaris subsp. vulgaris]	GO:0016020(membrane);GO:0016709(oxidoreductase activity, acting on paired donors, with incorporation or reduction of molecular oxygen, NAD(P)H as one donor, and incorporation of one atom of oxygen);GO:0042343(indole glucosinolate metabolic process);GO:0044550(secondary metabolite biosynthetic process);GO:0098542(defense response to other organism)	00943(Isoflavonoid biosynthesis)	K13260	EC:1.14.13.89;EC:1.14.13.53	8.41	9.82	12.15	4.33	3.83	4.06	23.64	25.24	28.88	20.59	24.52	24.24	20.26	19.35	23.37	1.99616e-76	1.89346e-75
Bv4_072020_omme	black	142.785	PREDICTED: uncharacterized protein LOC104889930 [Beta vulgaris subsp. vulgaris]	NA	NA	NA	NA	2.44	2.65	2.54	4.2	5.06	3.55	0.12	0.08	0.09	0.55	0.69	0.64	1.34	1.3	1.09	1.30042e-83	1.37001e-82
Bv4_095550_mzta	black	142.425	hypothetical protein BVRB_4g095550 [Beta vulgaris subsp. vulgaris]	NA	NA	NA	NA	1.45	1.8	1.51	2.34	2.49	2.06	0.49	0.47	0.38	0.7	0.87	1.19	0.64	0.53	0.58	5.60969e-35	2.39593e-34
Bv9_210730_pjza	black	142.251	PREDICTED: protein argonaute 5 [Beta vulgaris subsp. vulgaris]	GO:0003723(RNA binding);GO:0005737(cytoplasm);GO:0005829(cytosol);GO:0006351(transcription, DNA-templated);GO:0006355(regulation of transcription, DNA-templated);GO:0006417(regulation of translation);GO:0009615(response to virus);GO:0009814(defense response, incompatible interaction);GO:0031047(gene silencing by RNA);GO:0046872(metal ion binding);GO:0060145(viral gene silencing in virus induced g…	NA	NA	NA	307.07	363.42	349.69	517.84	515.78	501.6	224.03	231.15	215.78	139.43	142.12	141.25	138.9	125.56	136.15	3.59655e-118	5.87262e-117
Bv7_157220_qfya	black	142.153	PREDICTED: uncharacterized protein LOC104898171 [Beta vulgaris subsp. vulgaris]	GO:0003690(double-stranded DNA binding);GO:0005739(mitochondrion);GO:0006355(regulation of transcription, DNA-templated);GO:0009507(chloroplast)	NA	NA	NA	8.65	8.47	8.9	14.6	13.85	14.59	4.28	4.66	2.71	4.58	5.79	4.5	5.23	7.07	5.88	1.27394e-21	3.70328e-21
Bv3_050200_nkxh	black	142.118	PREDICTED: uncharacterized protein LOC104888044 [Beta vulgaris subsp. vulgaris]	GO:0005737(cytoplasm);GO:0008150(biological_process)	NA	NA	NA	2.3	2.72	2.35	3.91	3.37	4.12	0.88	1.29	1.1	0.81	0.77	1.25	1.72	1.56	1.28	2.90549e-27	1.00677e-26
Bv2_039110_mrmn	black	142.047	PREDICTED: uncharacterized protein LOC104887222 [Beta vulgaris subsp. vulgaris]	NA	NA	NA	NA	137.47	153.25	153.46	216.15	220.9	212.93	15.67	17.13	14.72	37.25	36.39	35.83	91.95	81.95	86.57	2.48951e-202	8.37314e-201
Bv3_049650_squo	black	142.001	PREDICTED: inositol-tetrakisphosphate 1-kinase 1 [Beta vulgaris subsp. vulgaris]	GO:0000287(magnesium ion binding);GO:0003824(catalytic activity);GO:0005524(ATP binding);GO:0005829(cytosol);GO:0010264(myo-inositol hexakisphosphate biosynthetic process);GO:0032957(inositol trisphosphate metabolic process);GO:0047325(inositol tetrakisphosphate 1-kinase activity);GO:0052725(inositol-1,3,4-trisphosphate 6-kinase activity);GO:0052726(inositol-1,3,4-trisphosphate 5-kinase activity)…	00562(Inositol phosphate metabolism);04070(Phosphatidylinositol signaling system)	K00913	EC:2.7.1.159;EC:2.7.1.134	28.37	25.94	30.03	61.63	60.17	60.08	12.44	15.01	13	13.89	13.39	13.44	17.52	13.05	14.49	2.28583e-153	5.30043e-152
Bv6_147070_ymqo	black	141.904	PREDICTED: coilin [Beta vulgaris subsp. vulgaris]	GO:0005634(nucleus);GO:0006396(RNA processing);GO:0008150(biological_process);GO:0015030(Cajal body);GO:0030619(U1 snRNA binding);GO:0030620(U2 snRNA binding)	NA	NA	NA	57.79	61.72	66	71.14	69.35	71.97	27.17	28.78	25.37	39.69	39.3	39.21	39.53	34.43	37.85	3.03188e-84	3.21294e-83
Bv6_129010_xpfp	black	141.578	PREDICTED: peroxidase 27 [Beta vulgaris subsp. vulgaris]	GO:0004601(peroxidase activity);GO:0009505(plant-type cell wall);GO:0009664(plant-type cell wall organization)	00940(Phenylpropanoid biosynthesis)	K00430	EC:1.11.1.7	3.39	3.65	3.69	4.3	4.33	4.75	1.03	1.23	0.62	0.71	1.2	0.97	1.57	1.82	2.25	7.54596e-24	2.35855e-23
Bv9_211920_pekg	black	141.223	hypothetical protein BVRB_9g211920 [Beta vulgaris subsp. vulgaris]	NA	NA	NA	NA	1.58	2.07	1.98	4.1	5.38	4.52	0.45	0	0.3	0.47	0.9	0.67	0.25	0.08	0.38	1.01463e-16	2.44047e-16
Bv3_048060_nznk	black	140.893	PREDICTED: leucine-rich repeat extensin-like protein 3 [Beta vulgaris subsp. vulgaris]	NA	NA	NA	NA	61.65	69.46	58.58	72.34	78.54	77.03	13.2	11.13	11.67	19.85	21.19	18.48	26.88	28.19	38.31	5.26736e-153	1.2167e-151
Bv9_207950_ixem	black	140.632	hypothetical protein BVRB_9g207950 [Beta vulgaris subsp. vulgaris]	GO:0005773(vacuole);GO:0005887(integral component of plasma membrane);GO:0009506(plasmodesma);GO:0009992(cellular water homeostasis);GO:0015250(water channel activity);GO:0015254(glycerol channel activity);GO:0034220(ion transmembrane transport)	NA	NA	NA	18.45	24.39	20.77	22.99	25.19	26.94	6.37	6.92	6.28	6.97	8.7	8.16	13.55	8.29	9.09	3.02583e-32	1.20725e-31
Bv9_211940_yufn	black	140.46	hypothetical protein BVRB_9g211940 isoform A [Beta vulgaris subsp. vulgaris];hypothetical protein BVRB_9g211940 isoform B [Beta vulgaris subsp. vulgaris]	GO:0009755(hormone-mediated signaling pathway);GO:0016301(kinase activity);GO:0016310(phosphorylation);GO:0016310(phosphorylation)	NA	NA	NA	273.81	331.92	331.38	353.19	337.73	377.5	55.59	57.98	55.85	28.51	26.29	26.59	107.44	101.82	116.91	0	0
Bv4_092010_ztuf	black	140.364	PREDICTED: protein NDR1 [Beta vulgaris subsp. vulgaris]	GO:0006952(defense response);GO:0009506(plasmodesma);GO:0046658(anchored component of plasma membrane)	NA	NA	NA	1.62	2.11	1.73	2.11	1.72	2.33	0.19	0.1	0.05	0.12	0.08	0.05	0.17	0.12	0.12	2.04915e-43	1.06969e-42
Bv6_136680_juie	black	140.144	PREDICTED: polyphenol oxidase, chloroplastic [Beta vulgaris subsp. vulgaris]	GO:0004503(monophenol monooxygenase activity);GO:0036263(L-DOPA monooxygenase activity)	00350(Tyrosine metabolism);00950(Isoquinoline alkaloid biosynthesis)	K00422	EC:1.10.3.1	57.37	66.31	67.54	63.65	69.68	67.54	2.01	1.54	1.62	6.07	6.44	5.89	8.33	7.36	7.35	0	0
Bv3_066450_hstn	black	139.995	PREDICTED: probable E3 ubiquitin-protein ligase ARI8 [Beta vulgaris subsp. vulgaris]	GO:0000151(ubiquitin ligase complex);GO:0000209(protein polyubiquitination);GO:0005737(cytoplasm);GO:0031624(ubiquitin conjugating enzyme binding);GO:0032436(positive regulation of proteasomal ubiquitin-dependent protein catabolic process);GO:0061630(ubiquitin protein ligase activity)	NA	NA	NA	47.24	54.67	55.79	112.24	114.35	109.9	22.47	22.26	18.47	21.27	23.24	20.92	37.83	34.65	34.02	2.10039e-228	8.51224e-227
Bv_001850_ciuf	black	139.894	PREDICTED: 20 kDa chaperonin, chloroplastic [Beta vulgaris subsp. vulgaris]	GO:0005759(mitochondrial matrix);GO:0006986(response to unfolded protein);GO:0009507(chloroplast);GO:0046872(metal ion binding);GO:0051082(unfolded protein binding);GO:0051085(chaperone cofactor-dependent protein refolding);GO:0051087(chaperone binding)	NA	NA	NA	3.29	4.85	4.67	8.61	6.52	7.63	0.88	1.97	1.64	1.27	0.98	2.53	2.33	1.35	1.39	1.54829e-17	3.84965e-17
Bv6_142010_npsj	black	139.752	PREDICTED: alpha-xylosidase 1 [Beta vulgaris subsp. vulgaris]	GO:0004553(hydrolase activity, hydrolyzing O-glycosyl compounds);GO:0005576(extracellular region);GO:0005618(cell wall);GO:0005829(cytosol);GO:0009044(xylan 1,4-beta-xylosidase activity);GO:0009505(plant-type cell wall);GO:0009506(plasmodesma);GO:0009507(chloroplast);GO:0010411(xyloglucan metabolic process);GO:0030246(carbohydrate binding);GO:0045493(xylan catabolic process);GO:0046556(alpha-L-ar…	NA	NA	NA	121.62	135.93	138.64	86.13	85.83	93.74	304.75	313.56	311.41	354.55	360.22	350.35	308.14	268.11	305.65	1.03951e-87	1.15677e-86
Bv1_018370_yfrd	black	139.632	PREDICTED: squamosa promoter-binding-like protein 8 [Beta vulgaris subsp. vulgaris]	GO:0003677(DNA binding);GO:0005634(nucleus);GO:0005737(cytoplasm);GO:0006351(transcription, DNA-templated);GO:0006355(regulation of transcription, DNA-templated);GO:0009554(megasporogenesis);GO:0009556(microsporogenesis);GO:0030154(cell differentiation);GO:0046872(metal ion binding);GO:0048653(anther development)	NA	NA	NA	8.51	11.88	8.58	20.82	22.41	22.75	3.53	3.42	3.53	4.51	5.63	4.19	5.44	5	5.09	2.69179e-88	3.02915e-87
Bv9_217150_wyon	black	138.898	PREDICTED: AAA-ATPase At3g50940-like [Beta vulgaris subsp. vulgaris]	GO:0002237(response to molecule of bacterial origin);GO:0005524(ATP binding);GO:0005739(mitochondrion);GO:0005740(mitochondrial envelope);GO:0005741(mitochondrial outer membrane);GO:0005886(plasma membrane);GO:0008219(cell death);GO:0009411(response to UV);GO:0009617(response to bacterium);GO:0009626(plant-type hypersensitive response);GO:0009863(salicylic acid mediated signaling pathway);GO:0016…	NA	NA	NA	8.45	7.99	9.43	11.59	10.72	10.07	3.6	4.15	2.9	6.07	3.94	4.06	4.82	3.64	3.02	1.36413e-16	3.26454e-16
Bv2_031460_zqqw	black	138.834	PREDICTED: probable WRKY transcription factor 40 [Beta vulgaris subsp. vulgaris]	GO:0002237(response to molecule of bacterial origin);GO:0003700(DNA binding transcription factor activity);GO:0005515(protein binding);GO:0005634(nucleus);GO:0006351(transcription, DNA-templated);GO:0006355(regulation of transcription, DNA-templated);GO:0009611(response to wounding);GO:0009751(response to salicylic acid);GO:0010200(response to chitin);GO:0031347(regulation of defense response);GO…	04626(Plant-pathogen interaction)	K18834	NA	11.82	13.71	12.7	27.06	28.53	28.17	3.94	4.92	4.72	7.78	8.2	7.91	2.78	2.77	4.16	9.67508e-157	2.29978e-155
Bv3_056400_wrns	black	136.541	PREDICTED: glucan endo-1,3-beta-glucosidase 8 [Beta vulgaris subsp. vulgaris]	GO:0004553(hydrolase activity, hydrolyzing O-glycosyl compounds);GO:0030247(polysaccharide binding);GO:0046658(anchored component of plasma membrane)	NA	NA	NA	14.72	23.4	17.01	22.74	23.76	20.4	5.16	6.73	4.37	7.46	8.28	7.46	5.18	4.64	4.3	6.93552e-50	4.13648e-49
Bv9_210630_jwys	black	136.329	PREDICTED: uncharacterized protein LOC104903592 isoform X1 [Beta vulgaris subsp. vulgaris]	GO:0005777(peroxisome);GO:0009408(response to heat)	04141(Protein processing in endoplasmic reticulum)	K13993	NA	98.22	107.99	107.1	97.48	90.51	95.44	320.8	318.56	303.7	294.1	302.71	291.63	307.98	281.63	298.75	5.89745e-93	7.0138e-92
Bv2_044350_iumd	black	136.146	PREDICTED: auxin-binding protein ABP19a [Beta vulgaris subsp. vulgaris]	GO:0005618(cell wall);GO:0033609(oxalate metabolic process);GO:0046564(oxalate decarboxylase activity)	NA	NA	NA	0.49	0.5	0.47	1.11	1.34	1.16	0	0.13	0.06	0.08	0.17	0.36	0.14	0.06	0.19	7.7067e-12	1.47447e-11
Bv9_222510_ickx	black	135.937	PREDICTED: cytochrome P450 76AD1-like [Beta vulgaris subsp. vulgaris]	GO:0016020(membrane);GO:0016709(oxidoreductase activity, acting on paired donors, with incorporation or reduction of molecular oxygen, NAD(P)H as one donor, and incorporation of one atom of oxygen);GO:0044550(secondary metabolite biosynthetic process)	NA	NA	NA	6.24	7.35	5.53	11.98	11.12	10.57	2.4	2.55	2.15	2.65	4.66	3.92	5.07	3.74	3.82	7.14996e-23	2.16922e-22
Bv2_032120_iuxa	black	135.861	PREDICTED: protein NRT1/ PTR FAMILY 1.2-like [Beta vulgaris subsp. vulgaris]	GO:0005215(transporter activity);GO:0005886(plasma membrane);GO:0006857(oligopeptide transport);GO:0015706(nitrate transport);GO:0016020(membrane);GO:0016021(integral component of membrane);GO:0055085(transmembrane transport);GO:0080054(low-affinity nitrate transmembrane transporter activity)	NA	NA	NA	6	4.11	5.06	4.43	3.51	3.95	12.96	15.5	15.13	14.82	14.34	15.75	16.23	13.74	13.14	4.03308e-46	2.21321e-45
Bv7_159800_ctzr	black	135.525	PREDICTED: GDSL esterase/lipase At5g03610 [Beta vulgaris subsp. vulgaris]	GO:0005576(extracellular region);GO:0016042(lipid catabolic process);GO:0016788(hydrolase activity, acting on ester bonds);GO:0052689(carboxylic ester hydrolase activity)	NA	NA	NA	34.92	40.91	35.43	65.58	60	57.75	17.47	18.16	18.48	25.16	24.4	24.78	31.79	26.11	28.75	5.01095e-100	6.5576e-99
Bv3_060740_mupo	black	135.4	hypothetical protein BVRB_3g060740 [Beta vulgaris subsp. vulgaris]	GO:0005576(extracellular region);GO:0005618(cell wall);GO:0005794(Golgi apparatus);GO:0005829(cytosol);GO:0006952(defense response);GO:0007165(signal transduction);GO:0009505(plant-type cell wall);GO:0009506(plasmodesma);GO:0016020(membrane);GO:0090353(polygalacturonase inhibitor activity)	NA	NA	NA	4.87	5.74	6.06	5.97	7.22	8.16	1.94	2.03	1.8	3.03	2.91	2.52	3.49	2.68	3.39	6.42921e-32	2.54258e-31
Bv5_111120_khxa	black	135.311	PREDICTED: protein SAR DEFICIENT 1 [Beta vulgaris subsp. vulgaris]	GO:0002229(defense response to oomycetes);GO:0003700(DNA binding transcription factor activity);GO:0005516(calmodulin binding);GO:0005634(nucleus);GO:0006351(transcription, DNA-templated);GO:0006355(regulation of transcription, DNA-templated);GO:0009617(response to bacterium);GO:0009626(plant-type hypersensitive response);GO:0010112(regulation of systemic acquired resistance);GO:0010224(response …	NA	NA	NA	117.69	133.81	126.47	166.26	174.13	163.15	61.5	64.95	62.69	37.4	34.21	35.7	20.58	17.97	17.34	0	0
Bv6_130760_hwmz	black	135.144	PREDICTED: G2/mitotic-specific cyclin-2 [Beta vulgaris subsp. vulgaris]	GO:0005515(protein binding);GO:0005634(nucleus);GO:0007049(cell cycle);GO:0016538(cyclin-dependent protein serine/threonine kinase regulator activity);GO:0051301(cell division);GO:0051726(regulation of cell cycle)	NA	NA	NA	2.82	2.51	2.91	5.13	4.37	4.41	0.6	0.44	0.63	1.59	1.93	1.9	0.95	0.85	1.01	1.28121e-75	1.20324e-74
Bv7_162650_koih	black	134.497	hypothetical protein BVRB_7g162650 [Beta vulgaris subsp. vulgaris]	GO:0005507(copper ion binding);GO:0005509(calcium ion binding);GO:0005515(protein binding);GO:0005516(calmodulin binding);GO:0005546(phosphatidylinositol-4,5-bisphosphate binding);GO:0005547(phosphatidylinositol-3,4,5-trisphosphate binding);GO:0005773(vacuole);GO:0005881(cytoplasmic microtubule);GO:0005886(plasma membrane);GO:0006499(N-terminal protein myristoylation);GO:0008017(microtubule bindi…	NA	NA	NA	168.3	192.18	192.85	209.98	205.95	198.12	84.75	83.55	85	55.93	56.82	56.19	105.15	90.33	98.37	6.47444e-90	7.411e-89
Bv3_061900_zdmx	black	134.341	PREDICTED: putative calcium-transporting ATPase 11, plasma membrane-type [Beta vulgaris subsp. vulgaris]	GO:0005388(calcium-transporting ATPase activity);GO:0005887(integral component of plasma membrane);GO:0043231(intracellular membrane-bounded organelle)	NA	NA	NA	29.15	31.11	35.6	37.8	36.56	34.96	14.25	13.98	12.15	18.92	21.94	20.39	17.79	17.27	18.09	9.57294e-67	7.66944e-66
Bv2_038530_mown	black	133.956	PREDICTED: uncharacterized protein LOC104887134 [Beta vulgaris subsp. vulgaris]	GO:0016787(hydrolase activity)	NA	NA	NA	5.34	6.2	6.9	3.58	3.42	3.62	14.66	15.31	15.89	12.26	10.86	11.65	14.77	12.68	13.43	1.18632e-138	2.4039e-137
Bv2_031650_ddui	black	132.713	PREDICTED: uncharacterized protein LOC104884645 [Beta vulgaris subsp. vulgaris]	GO:0005634(nucleus);GO:0016874(ligase activity)	00010(Glycolysis / Gluconeogenesis);00260(Glycine, serine and threonine metabolism)	K01834	EC:5.4.2.11	7.67	9.68	8.91	13.22	11.79	11.46	4.34	5.18	3.41	5.78	4.99	5.48	7.4	5.39	6.69	1.79031e-14	3.88224e-14
Bv7_167380_ycus	black	132.426	PREDICTED: glycine-rich protein 23 [Beta vulgaris subsp. vulgaris]	NA	NA	NA	NA	49.08	51.58	46.06	51.05	53.55	52.04	7.74	7.16	7.94	14.58	14.04	14.33	19.63	20.36	21.21	1.25695e-264	6.53688e-263
Bv5_110660_jxri	black	131.965	PREDICTED: malate synthase, glyoxysomal [Beta vulgaris subsp. vulgaris]	GO:0004474(malate synthase activity);GO:0005737(cytoplasm);GO:0006097(glyoxylate cycle)	00620(Pyruvate metabolism);00630(Glyoxylate and dicarboxylate metabolism)	K01638	EC:2.3.3.9	63.69	71.03	69.64	209.09	203.57	202.4	5.79	7.78	6.27	9.69	9.92	10.24	40.7	35.31	39.75	0	0
Bv7_178410_sgjn	black	131.538	PREDICTED: ankyrin-1-like [Beta vulgaris subsp. vulgaris]	GO:0007165(signal transduction);GO:0016020(membrane)	NA	NA	NA	4.6	6.25	7.02	7.28	7.16	7.41	0	0	0.14	0.31	0.15	0.1	1.58	2.76	2.44	1.06107e-77	1.02761e-76
Bv5_126600_czrg	black	131.472	PREDICTED: expansin-like B1 [Beta vulgaris subsp. vulgaris]	GO:0009505(plant-type cell wall);GO:0009506(plasmodesma);GO:0016020(membrane)	NA	NA	NA	0.87	0.94	0.84	1.65	1.73	1.66	0.49	0.51	0.63	0.22	0.46	0.24	0.57	0.4	0.58	1.08248e-22	3.26485e-22
Bv1_005540_tegu	black	131.467	PREDICTED: UDP-glycosyltransferase 91C1 [Beta vulgaris subsp. vulgaris]	GO:0009813(flavonoid biosynthetic process);GO:0043231(intracellular membrane-bounded organelle);GO:0052696(flavonoid glucuronidation);GO:0080043(quercetin 3-O-glucosyltransferase activity);GO:0080044(quercetin 7-O-glucosyltransferase activity)	NA	NA	NA	18.79	16.2	19.43	20.83	19.73	17.19	3.92	3.28	4.01	4.61	4.73	4.48	6.04	6.74	6.98	4.23225e-98	5.43189e-97
Bv7_158160_wmns	black	131.447	hypothetical protein BVRB_7g158160 [Beta vulgaris subsp. vulgaris]	NA	NA	NA	NA	8.42	6.72	7.29	13.08	16.94	11.93	4.07	3.1	3.08	1.77	2.2	2.04	3.51	3	3.76	7.46471e-39	3.52454e-38
Bv7_176200_oprx	black	130.928	PREDICTED: CEN-like protein 2 [Beta vulgaris subsp. vulgaris]	GO:0005634(nucleus);GO:0005737(cytoplasm);GO:0008429(phosphatidylethanolamine binding);GO:0009910(negative regulation of flower development);GO:0010228(vegetative to reproductive phase transition of meristem)	04712(Circadian rhythm - plant)	K16223	NA	0.88	0.61	0.59	1.74	1.16	1.64	0.11	0.07	0	0.25	0.13	0.16	0.23	0.21	0	1.10176e-08	1.78976e-08
Bv5_106940_pagh	black	130.897	PREDICTED: plastid lipid-associated protein 3, chloroplastic [Beta vulgaris subsp. vulgaris]	GO:0005198(structural molecule activity);GO:0008150(biological_process);GO:0009507(chloroplast);GO:0009534(chloroplast thylakoid);GO:0009535(chloroplast thylakoid membrane);GO:0009536(plastid);GO:0009579(thylakoid);GO:0010287(plastoglobule)	NA	NA	NA	58.93	69.2	67.28	30.56	30.78	33.97	108.39	109.54	116.4	92.45	96	94.36	81.38	80.01	93.75	4.1553e-53	2.61893e-52
Bv7_178680_zshw	black	130.056	PREDICTED: anthocyanidin 3-O-glucosyltransferase [Beta vulgaris subsp. vulgaris]	GO:0009813(flavonoid biosynthetic process);GO:0043231(intracellular membrane-bounded organelle);GO:0052696(flavonoid glucuronidation);GO:0080043(quercetin 3-O-glucosyltransferase activity);GO:0080044(quercetin 7-O-glucosyltransferase activity)	00944(Flavone and flavonol biosynthesis)	K22772	EC:2.4.1.159	1.89	2.79	1.89	2.9	2.45	3.36	0.76	0.76	0.65	0.88	0.44	0.27	0.29	0.22	0.37	8.13059e-19	2.12942e-18
Bv_004460_xeww	black	130.044	hypothetical protein BVRB_004460 [Beta vulgaris subsp. vulgaris]	NA	NA	NA	NA	2.25	2.8	2.54	4.65	5.73	4.92	1.28	1.04	1.43	1.58	1.32	1.44	2.09	1.33	1.1	1.04297e-14	2.2859e-14
Bv4_082900_annc	black	129.348	hypothetical protein SOVF_016520 [Spinacia oleracea]	GO:0000027(ribosomal large subunit assembly);GO:0003735(structural constituent of ribosome);GO:0005761(mitochondrial ribosome)	03010(Ribosome)	K02887	NA	15.02	19.12	16.4	22.68	24.52	21.75	8.74	7	8.8	9.22	10.03	10.06	11.52	11.36	15.55	2.65949e-23	8.16219e-23
Bv2_045920_gycn	black	129.251	PREDICTED: two-component response regulator-like PRR73 isoform X1 [Beta vulgaris subsp. vulgaris]	GO:0000156(phosphorelay response regulator activity);GO:0000160(phosphorelay signal transduction system);GO:0003677(DNA binding);GO:0005634(nucleus);GO:0005739(mitochondrion);GO:0006351(transcription, DNA-templated);GO:0006355(regulation of transcription, DNA-templated);GO:0007623(circadian rhythm);GO:0009266(response to temperature stimulus);GO:0010017(red or far-red light signaling pathway);GO:…	04712(Circadian rhythm - plant)	K12129	NA	37.35	43.7	43	37.48	37.76	38.58	94.61	91.78	93.07	97.2	97.81	100.49	83.93	81.86	84.81	2.60832e-77	2.5085e-76
Bv_008380_ppyd	black	128.754	PREDICTED: HVA22-like protein i [Beta vulgaris subsp. vulgaris]	GO:0003674(molecular_function);GO:0005634(nucleus);GO:0008150(biological_process);GO:0016020(membrane)	NA	NA	NA	58.12	73.76	71.2	66.85	68.75	66.93	25.11	24.32	22.69	22.77	25.02	24.31	25.37	22.95	26.15	1.2044e-125	2.12054e-124
Bv5_120700_icio	black	128.203	hypothetical protein BVRB_5g120700 [Beta vulgaris subsp. vulgaris]	NA	NA	NA	NA	1189.46	1319	1302.69	1272.92	1250.83	1217.36	48.41	51.3	43.21	74.48	75.81	72.35	269.93	244.58	247.45	3.34402e-212	1.19153e-210
Bv8_188910_smhz	black	127.671	PREDICTED: uncharacterized protein LOC104901396 [Beta vulgaris subsp. vulgaris]	GO:0003674(molecular_function);GO:0005634(nucleus);GO:0008150(biological_process);GO:0008150(biological_process)	NA	NA	NA	29.87	33.33	29.87	47.08	51.15	47.45	14.29	15.2	16.03	25.1	25.91	26.1	19.92	18.03	24.1	4.20022e-40	2.0482e-39
Bv6_143330_gsxm	black	127.471	PREDICTED: endoglucanase 11 [Beta vulgaris subsp. vulgaris]	GO:0004553(hydrolase activity, hydrolyzing O-glycosyl compounds);GO:0005576(extracellular region);GO:0008810(cellulase activity);GO:0030245(cellulose catabolic process);GO:0071555(cell wall organization)	00500(Starch and sucrose metabolism)	K01179	EC:3.2.1.4	3.11	4.73	3.68	8.82	6.48	7.91	1.21	1.41	1.38	1.82	1.8	1.76	2.01	2.5	2.91	2.91386e-49	1.71683e-48
Bv8_190940_hrft	black	127.214	PREDICTED: auxin-responsive protein SAUR72-like [Beta vulgaris subsp. vulgaris]	GO:0003674(molecular_function);GO:0005634(nucleus);GO:0009733(response to auxin)	00510(N-Glycan biosynthesis)	K07441	EC:2.4.1.141	16.26	22.65	23.18	26.65	22.24	22.56	3.43	3.47	4.62	3.35	1.45	1.2	9.42	7.59	8.45	3.52698e-46	1.93903e-45
Bv3_057540_nans	black	127.185	PREDICTED: lysine--tRNA ligase isoform X1 [Beta vulgaris subsp. vulgaris]	GO:0003677(DNA binding);GO:0004824(lysine-tRNA ligase activity);GO:0005524(ATP binding);GO:0005737(cytoplasm);GO:0005829(cytosol);GO:0006430(lysyl-tRNA aminoacylation);GO:0009506(plasmodesma);GO:0046872(metal ion binding)	00970(Aminoacyl-tRNA biosynthesis)	K04567	EC:6.1.1.6	2.58	2.7	2.94	4	4.22	4.89	1.44	1.36	1.2	1.43	1.66	1.85	2.3	1.99	2.25	1.38376e-44	7.37541e-44
Bv4_086640_jhte	black	127.15	hypothetical protein BVRB_4g086640 [Beta vulgaris subsp. vulgaris]	GO:0003674(molecular_function);GO:0005886(plasma membrane);GO:0008150(biological_process);GO:0016021(integral component of membrane)	NA	NA	NA	0.65	0.58	0.85	1.79	1.45	1.57	0	0.15	0.07	0.38	0.21	0.47	0.19	0.38	0.4	3.14259e-14	6.73028e-14
Bv6_127320_cktt	black	125.976	PREDICTED: probable WRKY transcription factor 15 isoform X2 [Beta vulgaris subsp. vulgaris]	GO:0003700(DNA binding transcription factor activity);GO:0005516(calmodulin binding);GO:0005634(nucleus);GO:0006351(transcription, DNA-templated);GO:0006355(regulation of transcription, DNA-templated);GO:0010200(response to chitin);GO:0043565(sequence-specific DNA binding);GO:0044212(transcription regulatory region DNA binding)	04016(MAPK signaling pathway - plant);04626(Plant-pathogen interaction)	K13425	NA	3.58	4.11	3.9	10.31	11.21	9.66	1.33	1.41	1.38	1.53	1.75	1.31	2.5	2.52	2.64	6.14714e-110	9.13391e-109
Bv7_163740_ogqp	black	125.446	PREDICTED: uncharacterized protein LOC104898930 [Beta vulgaris subsp. vulgaris]	GO:0005515(protein binding);GO:0005634(nucleus);GO:0008150(biological_process)	NA	NA	NA	24.7	31.76	24.79	28.79	30.61	34.26	19	15.26	15.21	13.49	15.36	13.24	12.68	13.24	13.27	2.2765e-24	7.22458e-24
Bv2_035900_rjtp	black	125.352	PREDICTED: microtubule-associated protein TORTIFOLIA1 [Beta vulgaris subsp. vulgaris]	GO:0005737(cytoplasm);GO:0008017(microtubule binding)	NA	NA	NA	3.52	3.8	3.61	4.72	4.59	4.18	0.94	0.31	0.55	0.34	0.77	0.56	2.26	2.08	1.54	1.0345e-29	3.85241e-29
Bv_012800_cxjx	black	124.256	PREDICTED: hypersensitive-induced response protein 1 [Beta vulgaris subsp. vulgaris]	GO:0005515(protein binding);GO:0005773(vacuole);GO:0005774(vacuolar membrane);GO:0005794(Golgi apparatus);GO:0005829(cytosol);GO:0005886(plasma membrane);GO:0009506(plasmodesma);GO:0016020(membrane);GO:0043424(protein histidine kinase binding)	NA	NA	NA	15.86	17.44	17.33	19.53	22.11	20.32	7.49	8.16	6.66	1.17	1.47	1.13	2.08	2.66	1.67	7.2436e-217	2.64921e-215
Bv7_160010_yrsz	black	123.963	PREDICTED: ABC transporter G family member 39 isoform X1 [Beta vulgaris subsp. vulgaris]	GO:0005886(plasma membrane);GO:0016021(integral component of membrane);GO:0042626(ATPase activity, coupled to transmembrane movement of substances)	02010(ABC transporters)	K05681	NA	97.14	111.04	115.37	121.23	118.68	117.81	46.66	48.5	48.94	31.91	30.18	29.35	19.47	18.33	20.08	0	0
Bv6_146590_knhj	black	123.923	hypothetical protein BVRB_6g146590 [Beta vulgaris subsp. vulgaris]	GO:0005886(plasma membrane)	NA	NA	NA	5.2	7.09	7.27	9.39	13.39	10.73	2.22	2.93	2.31	1.06	2.37	1.74	5.3	3.25	3.4	1.41575e-19	3.81077e-19
Bv7_174240_eqit	black	122.892	PREDICTED: uncharacterized protein LOC104900147 [Beta vulgaris subsp. vulgaris]	GO:0005215(transporter activity);GO:0005634(nucleus);GO:0005739(mitochondrion);GO:0006810(transport)	NA	NA	NA	29.46	29.21	35.21	13.22	12.79	15.53	42.02	43.38	41.25	38.71	39.51	36.96	38.36	34.75	33.98	2.4165e-41	1.20919e-40
Bv6_139790_onpz	black	122.714	hypothetical protein BVRB_6g139790 [Beta vulgaris subsp. vulgaris]	NA	NA	NA	NA	1.1	1.04	1.02	1.18	1.16	1.08	0.05	0	0	0.15	0.27	0.13	0.45	0.08	0.44	6.06421e-18	1.53387e-17
Bv9_205660_jhqe	black	122.589	PREDICTED: probable xyloglucan endotransglucosylase/hydrolase protein 32 [Beta vulgaris subsp. vulgaris]	GO:0004553(hydrolase activity, hydrolyzing O-glycosyl compounds);GO:0005576(extracellular region);GO:0005618(cell wall);GO:0005975(carbohydrate metabolic process);GO:0010411(xyloglucan metabolic process);GO:0016762(xyloglucan:xyloglucosyl transferase activity);GO:0016798(hydrolase activity, acting on glycosyl bonds);GO:0016998(cell wall macromolecule catabolic process);GO:0042546(cell wall biogen…	NA	NA	NA	0.31	0.6	0.79	12.77	13.38	11.59	270.46	277.46	254.15	271.62	286.99	259.45	242.38	225.23	238.03	0	0
Bv1_023210_chuj	black	122.542	PREDICTED: petal death protein [Beta vulgaris subsp. vulgaris]	GO:0003824(catalytic activity);GO:0004451(isocitrate lyase activity);GO:0008152(metabolic process);GO:0009507(chloroplast);GO:0009570(chloroplast stroma)	NA	NA	NA	108.77	125.01	130.37	131.79	134.55	136.29	51.42	49.89	55.19	27.24	26.99	25.76	21.38	16.12	19.21	1.98424e-251	9.49585e-250
Bv7_158510_gwiz	black	122.371	PREDICTED: secoisolariciresinol dehydrogenase [Beta vulgaris subsp. vulgaris]	GO:0005737(cytoplasm);GO:0016491(oxidoreductase activity);GO:0055114(oxidation-reduction process)	00906(Carotenoid biosynthesis)	K09841	EC:1.1.1.288	2.6	3.43	3.33	6.55	7.29	5.53	0.74	0	0.5	1.31	1.96	1.25	2.02	1.83	2.55	4.12237e-13	8.39402e-13
Bv2_038971z499	black	122.366	PREDICTED: uncharacterized protein LOC104887328 [Beta vulgaris subsp. vulgaris]	NA	NA	NA	NA	1.15	1.22	0.87	1.22	1.86	1.6	0.21	0.59	0.19	0.43	0.4	0.18	0.1	0.44	0.45	1.13108e-06	1.63016e-06
Bv2_028360_kfyw	black	121.893	PREDICTED: GDSL esterase/lipase 7 [Beta vulgaris subsp. vulgaris]	GO:0005576(extracellular region);GO:0016042(lipid catabolic process);GO:0016298(lipase activity);GO:0016788(hydrolase activity, acting on ester bonds);GO:0052689(carboxylic ester hydrolase activity)	00561(Glycerolipid metabolism)	K00679	EC:2.3.1.158	7.88	8.06	8.76	10.64	10.82	10.63	3.92	4.37	4	4.04	3.22	2.82	6.08	5.95	6.79	1.04208e-23	3.2363e-23
Bv4_080140_sifg	black	121.581	hypothetical protein BVRB_4g080140 [Beta vulgaris subsp. vulgaris]	GO:0003674(molecular_function);GO:0008150(biological_process);GO:0016021(integral component of membrane)	NA	NA	NA	2.33	2.3	2.68	1.63	1.68	1.36	6.53	6.52	6.31	8.33	8.2	7.36	7.17	5.41	5.91	4.20326e-43	2.18404e-42
Bv1_002310_dexr	black	121.464	PREDICTED: 3-ketoacyl-CoA synthase 1 [Beta vulgaris subsp. vulgaris]	GO:0000038(very long-chain fatty acid metabolic process);GO:0005783(endoplasmic reticulum);GO:0005789(endoplasmic reticulum membrane);GO:0006633(fatty acid biosynthetic process);GO:0009409(response to cold);GO:0009416(response to light stimulus);GO:0009922(fatty acid elongase activity);GO:0010025(wax biosynthetic process);GO:0016020(membrane);GO:0016021(integral component of membrane);GO:0016746(…	00062(Fatty acid elongation)	K15397	EC:2.3.1.199	57.38	68.06	69.21	111.96	111.11	107.33	38.28	39.95	40.09	48.58	48.42	50.4	21.89	22.33	21.17	1.67278e-146	3.65292e-145
Bv6_152510_hofy	black	121.44	hypothetical protein BVRB_6g152510 [Beta vulgaris subsp. vulgaris]	GO:0004338(glucan exo-1,3-beta-glucosidase activity);GO:0004565(beta-galactosidase activity);GO:0008422(beta-glucosidase activity);GO:0033907(beta-D-fucosidase activity);GO:0047701(beta-L-arabinosidase activity);GO:0080083(beta-gentiobiose beta-glucosidase activity);GO:1901657(glycosyl compound metabolic process)	00500(Starch and sucrose metabolism);00460(Cyanoamino acid metabolism);00940(Phenylpropanoid biosynthesis)	K01188	EC:3.2.1.21	11.99	11.34	12.51	21.87	20.37	21.46	1.12	1.35	1.11	8.86	8.13	8.79	1.55	1.5	1.97	5.48926e-264	2.84651e-262
Bv_008220_hrea	black	120.847	PREDICTED: L-ascorbate oxidase homolog [Beta vulgaris subsp. vulgaris]	GO:0005507(copper ion binding);GO:0005576(extracellular region);GO:0005618(cell wall);GO:0005829(cytosol);GO:0009505(plant-type cell wall);GO:0009506(plasmodesma);GO:0016722(oxidoreductase activity, oxidizing metal ions);GO:0048046(apoplast);GO:0055114(oxidation-reduction process)	NA	NA	NA	4.06	4.27	4.04	3.53	4.35	4.49	1.3	1.5	1.65	1.4	1.49	1.07	1.79	1.49	1.45	1.01906e-30	3.89402e-30
Bv3_056150_kfin	black	120.825	PREDICTED: uncharacterized protein LOC104888707 [Beta vulgaris subsp. vulgaris]	GO:0008168(methyltransferase activity);GO:0032259(methylation)	NA	NA	NA	11.55	11.81	12.51	11.65	12.89	11.14	5.69	4.64	4.31	3.38	4.36	3.78	4.11	3.43	4.28	1.67937e-63	1.27612e-62
Bv1_008220_irwc	black	120.733	PREDICTED: 14-3-3 protein 1 [Beta vulgaris subsp. vulgaris]	GO:0005515(protein binding)	NA	NA	NA	16.14	18.23	17.54	16.96	16.76	16.78	6.82	7.98	7.47	8.07	7.88	8.6	9.21	8.67	9.82	2.14007e-85	2.29353e-84
Bv1_004050_rawf	black	120.134	PREDICTED: heavy metal-associated isoprenylated plant protein 39 [Beta vulgaris subsp. vulgaris]	GO:0005634(nucleus);GO:0030001(metal ion transport);GO:0046872(metal ion binding)	NA	NA	NA	8.91	10.1	8.36	10.05	9.64	8.57	3.97	3.64	2.91	2.48	2.61	2.26	4.23	4.24	4.59	8.06104e-71	6.93026e-70
Bv1_011340_dsoj	black	119.878	PREDICTED: galactinol--sucrose galactosyltransferase [Beta vulgaris subsp. vulgaris]	GO:0004553(hydrolase activity, hydrolyzing O-glycosyl compounds);GO:0005737(cytoplasm);GO:0005975(carbohydrate metabolic process);GO:0005986(sucrose biosynthetic process);GO:0006979(response to oxidative stress);GO:0009414(response to water deprivation);GO:0009507(chloroplast);GO:0009737(response to abscisic acid);GO:0010325(raffinose family oligosaccharide biosynthetic process);GO:0019593(mannit…	00052(Galactose metabolism)	K06617	EC:2.4.1.82	14.83	18.79	15.67	32.47	34.09	35.8	10.63	9.7	8.33	9.28	10.43	10.04	14.53	13.45	13.3	1.00567e-81	1.02994e-80
Bv5_124530_omku	black	119.397	PREDICTED: non-specific phospholipase C6 [Beta vulgaris subsp. vulgaris]	GO:0003993(acid phosphatase activity);GO:0005576(extracellular region);GO:0005886(plasma membrane);GO:0009395(phospholipid catabolic process);GO:0016788(hydrolase activity, acting on ester bonds)	00562(Inositol phosphate metabolism);00564(Glycerophospholipid metabolism);00565(Ether lipid metabolism)	K01114	EC:3.1.4.3	16.29	17.15	18.74	15.74	20.98	16.94	78.77	80.06	78.86	94.99	94.38	91.56	93.94	78.72	79.02	4.69379e-237	2.01095e-235
Bv3_050960_mwcd	black	119.056	PREDICTED: caffeic acid 3-O-methyltransferase 2 [Beta vulgaris subsp. vulgaris]	GO:0005829(cytosol);GO:0008171(O-methyltransferase activity);GO:0008757(S-adenosylmethionine-dependent methyltransferase activity);GO:0019438(aromatic compound biosynthetic process)	00940(Phenylpropanoid biosynthesis)	K13066	EC:2.1.1.68	0.47	1.99	0.71	1.93	2.04	2.62	0	0	0	0	0	0	0.15	0.26	0.16	3.36482e-24	1.06334e-23
Bv5_103350_fzqy	black	118.896	PREDICTED: protein DETOXIFICATION 44, chloroplastic [Beta vulgaris subsp. vulgaris]	GO:0006855(drug transmembrane transport)	NA	NA	NA	29.69	36.2	31.93	10.18	9.5	10.03	49	51.49	50.76	39.65	36.69	38.9	42.85	38.29	43.74	8.45442e-86	9.14785e-85
Bv3_061890_rmmx	black	118.571	PREDICTED: uncharacterized protein At2g39795, mitochondrial [Beta vulgaris subsp. vulgaris]	GO:0003674(molecular_function);GO:0003729(mRNA binding);GO:0005739(mitochondrion);GO:0008150(biological_process);GO:0070131(positive regulation of mitochondrial translation)	NA	NA	NA	5.18	4.21	5.23	6.6	8.22	7.01	1.14	2.09	1.29	3.72	3.64	2.4	2.63	3.2	2.43	8.24285e-21	2.31898e-20
Bv5_114850_thze	black	117.926	PREDICTED: glutathione S-transferase U9 [Beta vulgaris subsp. vulgaris]	GO:0004364(glutathione transferase activity);GO:0005737(cytoplasm);GO:0006749(glutathione metabolic process);GO:0009407(toxin catabolic process)	00480(Glutathione metabolism)	K00799	EC:2.5.1.18	17.8	22.51	23.62	21.7	19.59	20.36	4.25	4.43	4.4	2.5	1.93	1.76	5.6	5.75	5.23	4.15459e-127	7.43857e-126
Bv9_217280_zecq	black	117.512	PREDICTED: universal stress protein PHOS32 [Beta vulgaris subsp. vulgaris]	GO:0005737(cytoplasm);GO:0005886(plasma membrane);GO:0006950(response to stress);GO:0009269(response to desiccation);GO:0016787(hydrolase activity)	NA	NA	NA	109.16	109.12	117.91	109.09	104.49	112.15	41.53	41.51	40.65	43.72	41.99	41.84	56.99	54.08	58.7	1.53513e-147	3.38934e-146
Bv9_222430_awqa	black	117.269	PREDICTED: uncharacterized protein LOC104904812 [Beta vulgaris subsp. vulgaris]	GO:0003674(molecular_function);GO:0005634(nucleus);GO:0008150(biological_process)	00052(Galactose metabolism);00561(Glycerolipid metabolism);00600(Sphingolipid metabolism);00603(Glycosphingolipid biosynthesis - globo and isoglobo series)	K07407	EC:3.2.1.22	4.95	4.14	5.49	6.45	5.02	6.73	2.06	1.29	1.61	1.89	2.62	2.63	3.19	1.86	3.06	1.62907e-11	3.06916e-11
Bv5_112520_xcpd	black	117.198	PREDICTED: uncharacterized protein At1g05835 [Beta vulgaris subsp. vulgaris]	NA	NA	NA	NA	4.85	5.18	5.14	6.04	5.13	5.07	1.27	0.61	0.89	0.55	0.73	0.94	2.84	2.28	1.27	1.0653e-23	3.30556e-23
Bv9_219230_nsuf	black	117.003	PREDICTED: PTI1-like tyrosine-protein kinase At3g15890 [Beta vulgaris subsp. vulgaris]	GO:0004672(protein kinase activity);GO:0005524(ATP binding);GO:0005886(plasma membrane);GO:0006468(protein phosphorylation);GO:0009506(plasmodesma);GO:0016301(kinase activity)	NA	NA	NA	16.21	25.17	25.9	30.42	25.88	25.76	10.1	11.17	10.72	9.32	11.61	10.22	15.18	13.81	16.29	1.13851e-22	3.42983e-22
Bv2_046130_pqko	black	116.957	PREDICTED: uncharacterized protein LOC104906126 [Beta vulgaris subsp. vulgaris]	GO:0005515(protein binding);GO:0005886(plasma membrane);GO:0009534(chloroplast thylakoid);GO:0033614(chloroplast proton-transporting ATP synthase complex assembly)	NA	NA	NA	108.21	126.23	124.52	56.33	57.79	55.42	188.72	192.49	182.87	140.02	138.35	135.83	170.4	161.21	176.49	1.51988e-38	7.12761e-38
Bv7_160700_mwox	black	116.344	PREDICTED: AF4/FMR2 family member 4 [Beta vulgaris subsp. vulgaris]	GO:0003700(DNA binding transcription factor activity);GO:0005515(protein binding);GO:0005634(nucleus);GO:0005886(plasma membrane);GO:0006355(regulation of transcription, DNA-templated);GO:0010629(negative regulation of gene expression);GO:1900037(regulation of cellular response to hypoxia)	NA	NA	NA	3.87	4.74	2.74	5.56	6.4	6.66	1.92	1.54	1.67	0.84	1.46	0.82	3.18	2.22	2.31	1.0759e-20	3.01508e-20
Bv_004970_akho	black	116.326	PREDICTED: uncharacterized protein LOC104883970 [Beta vulgaris subsp. vulgaris]	GO:0003674(molecular_function);GO:0005634(nucleus);GO:0008150(biological_process)	NA	NA	NA	19.54	18.62	22.86	40.22	38.11	38.74	9.64	9.94	8.05	18.26	17.75	17.36	14.91	12.88	14.3	1.38619e-67	1.12559e-66
Bv8_198700_cssz	black	115.921	hypothetical protein BVRB_8g198700 [Beta vulgaris subsp. vulgaris]	NA	04016(MAPK signaling pathway - plant);04075(Plant hormone signal transduction)	K14514	NA	6.33	7.34	6.79	5.46	6.74	6.75	1.06	0.78	0.25	0.26	0.72	0.36	0.5	0.73	1.14	1.17312e-29	4.36048e-29
Bv2_025380_sacn	black	115.823	hypothetical protein BVRB_2g025380 [Beta vulgaris subsp. vulgaris]	NA	NA	NA	NA	10.9	13.27	10.71	12.63	11.77	8.58	0.38	0.22	0.67	0.04	0.17	0.32	0.76	0.5	0.92	2.31302e-104	3.2065e-103
Bv7_160080_xqpw	black	115.49	PREDICTED: UPF0481 protein At3g47200 [Beta vulgaris subsp. vulgaris]	GO:0003674(molecular_function);GO:0005886(plasma membrane);GO:0008150(biological_process);GO:0016021(integral component of membrane)	00052(Galactose metabolism);00500(Starch and sucrose metabolism)	K01193	EC:3.2.1.26	14.63	19.36	19.85	16.75	15.58	20.44	4.38	3.29	4.48	4.81	4.4	4.71	5.11	3.52	4.21	3.19914e-66	2.54601e-65
Bv9_209150_xzcu	black	114.935	hypothetical protein BVRB_9g209150 [Beta vulgaris subsp. vulgaris]	NA	NA	NA	NA	2.25	3.67	3.48	4	5.08	4.35	1.68	1.9	1.29	0.54	0.99	0.95	1.91	2.22	1.53	4.21471e-13	8.57718e-13
Bv4_084210_ngth	black	114.565	PREDICTED: ribosome-recycling factor, chloroplastic [Beta vulgaris subsp. vulgaris]	GO:0002184(cytoplasmic translational termination);GO:0009507(chloroplast);GO:0032544(plastid translation);GO:0043023(ribosomal large subunit binding)	NA	NA	NA	100.05	105.88	111.71	102.29	100.03	101.88	55.95	57.44	55.36	52.72	51.72	51.62	63.32	57.54	59.96	8.02732e-15	1.76733e-14
Bv4_084850_qmrd	black	114.515	PREDICTED: bidirectional sugar transporter SWEET2 [Beta vulgaris subsp. vulgaris]	GO:0008643(carbohydrate transport);GO:0016021(integral component of membrane);GO:0051119(sugar transmembrane transporter activity)	NA	NA	NA	7.07	8.55	8.42	10.53	11.28	10.42	3.94	3.7	3.79	6.59	7.29	6.4	5.34	4.94	4.86	8.4701e-44	4.45255e-43
Bv2_027140_oozk	black	114.327	PREDICTED: LEAF RUST 10 DISEASE-RESISTANCE LOCUS RECEPTOR-LIKE PROTEIN KINASE-like 2.4 [Beta vulgaris subsp. vulgaris]	GO:0005886(plasma membrane);GO:0016301(kinase activity);GO:0016310(phosphorylation)	NA	NA	NA	25.86	30.21	31.87	13.49	12.16	13.6	52.33	55.56	51.32	38.49	36.73	36.83	43.06	39.47	42.31	1.77834e-119	2.92232e-118
Bv1_008450_wfuk	black	113.528	PREDICTED: isoamylase 3, chloroplastic isoform X1 [Beta vulgaris subsp. vulgaris]	GO:0004556(alpha-amylase activity);GO:0005975(carbohydrate metabolic process);GO:0005983(starch catabolic process);GO:0009507(chloroplast);GO:0009569(chloroplast starch grain);GO:0009570(chloroplast stroma);GO:0019156(isoamylase activity)	00500(Starch and sucrose metabolism)	K01214	EC:3.2.1.68	31.45	35.67	37.83	47.51	42.33	44.92	130.37	126.66	133.74	131.57	133.31	138.39	126.95	120.5	122.59	9.30477e-96	1.14521e-94
Bv9_211630_wjha	black	112.434	PREDICTED: IAA-amino acid hydrolase ILR1-like 4 [Beta vulgaris subsp. vulgaris]	GO:0005788(endoplasmic reticulum lumen);GO:0006508(proteolysis);GO:0008152(metabolic process);GO:0008237(metallopeptidase activity);GO:0009507(chloroplast);GO:0010112(regulation of systemic acquired resistance);GO:0010178(IAA-amino acid conjugate hydrolase activity);GO:0046872(metal ion binding)	NA	NA	NA	64.71	70.27	67.15	44.38	43.27	45.39	111.39	109.84	106.39	142.3	140.15	129.95	104.64	96.63	104.49	8.64521e-77	8.257e-76
Bv7_165020_jcfo	black	112.421	PREDICTED: COBRA-like protein 7 [Beta vulgaris subsp. vulgaris]	GO:0003674(molecular_function);GO:0005768(endosome);GO:0005783(endoplasmic reticulum);GO:0005794(Golgi apparatus);GO:0005802(trans-Golgi network);GO:0005886(plasma membrane);GO:0009506(plasmodesma);GO:0010215(cellulose microfibril organization);GO:0016049(cell growth);GO:0031225(anchored component of membrane);GO:0046658(anchored component of plasma membrane)	03060(Protein export);04141(Protein processing in endoplasmic reticulum);04145(Phagosome)	K10956	NA	3.53	2.96	4.42	6.33	4.66	6.8	0.6	1.38	0	0.85	1.69	2.95	0.94	0.96	0.38	1.16711e-06	1.68061e-06
Bv4_073010_uswd	black	111.463	PREDICTED: cinnamoyl-CoA reductase 1 [Beta vulgaris subsp. vulgaris]	GO:0004022(alcohol dehydrogenase (NAD) activity);GO:0005794(Golgi apparatus);GO:0005829(cytosol);GO:0005886(plasma membrane);GO:0009506(plasmodesma);GO:0050662(coenzyme binding)	00940(Phenylpropanoid biosynthesis)	K09753	EC:1.2.1.44	55.44	62.68	63.39	59.43	60.02	57.51	28.43	27.74	28.77	23.69	24.49	24.77	37.03	32.52	35.67	9.05568e-64	6.92806e-63
Bv3_061910_jaxy	black	111.341	PREDICTED: probable sugar phosphate/phosphate translocator At5g04160 [Beta vulgaris subsp. vulgaris]	GO:0000139(Golgi membrane);GO:0005794(Golgi apparatus);GO:0008514(organic anion transmembrane transporter activity);GO:0008643(carbohydrate transport);GO:0015780(nucleotide-sugar transmembrane transport);GO:0016021(integral component of membrane);GO:0048359(mucilage metabolic process involved in seed coat development)	NA	NA	NA	4.34	6.69	5.38	4.35	3.95	2.36	9.26	8.66	9.06	10.87	10.32	11.16	10.94	11.87	11.44	2.3741e-19	6.33726e-19
Bv2_036770_hufu	black	109.948	PREDICTED: vinorine synthase-like [Beta vulgaris subsp. vulgaris]	GO:0005737(cytoplasm);GO:0009735(response to cytokinin);GO:0016740(transferase activity)	00940(Phenylpropanoid biosynthesis);00945(Stilbenoid, diarylheptanoid and gingerol biosynthesis);00941(Flavonoid biosynthesis)	K13065	EC:2.3.1.133	12.34	16.91	14.11	20.67	21.95	21.96	3.99	5.04	4.16	11.82	11.85	12.02	8.22	7.54	8.57	2.03928e-68	1.67786e-67
Bv8_181870_utim	black	109.531	PREDICTED: serine carboxypeptidase-like 7 isoform X1 [Beta vulgaris subsp. vulgaris]	GO:0004185(serine-type carboxypeptidase activity);GO:0016747(transferase activity, transferring acyl groups other than amino-acyl groups);GO:0019748(secondary metabolic process);GO:0051603(proteolysis involved in cellular protein catabolic process)	NA	NA	NA	7.94	6.52	5.53	12.41	11.96	10.45	2.2	2.01	1.77	3.42	3.21	4.51	5.98	5.29	4.99	7.81022e-28	2.75293e-27
Bv2_028880_mpsx	black	109.048	PREDICTED: agamous-like MADS-box protein AGL15 isoform X2 [Beta vulgaris subsp. vulgaris];PREDICTED: agamous-like MADS-box protein AGL15 isoform X1 [Beta vulgaris subsp. vulgaris]	GO:0000977(RNA polymerase II regulatory region sequence-specific DNA binding);GO:0003677(DNA binding);GO:0003700(DNA binding transcription factor activity);GO:0004601(peroxidase activity);GO:0005515(protein binding);GO:0005634(nucleus);GO:0005737(cytoplasm);GO:0006351(transcription, DNA-templated);GO:0009793(embryo development ending in seed dormancy);GO:0009910(negative regulation of flower deve…	NA	NA	NA	0.77	0.75	0.67	1.44	1.54	2.29	0.29	0.17	0.35	0.25	0.26	0.16	0.41	0.27	0.16	9.57562e-16	2.19775e-15
Bv2_028430_cswo	black	108.668	PREDICTED: DNA-directed RNA polymerase 2, chloroplastic/mitochondrial [Beta vulgaris subsp. vulgaris]	GO:0005739(mitochondrion);GO:0009536(plastid)	NA	NA	NA	29.36	25.22	26.57	7.62	7.94	5.74	44.57	45.57	45.1	64.82	60.91	61.37	68.34	68.06	76.14	1.06745e-182	3.11309e-181
Bv5_112090_hzqc	black	107.774	PREDICTED: protein DETOXIFICATION 16 [Beta vulgaris subsp. vulgaris]	GO:0006855(drug transmembrane transport)	NA	NA	NA	6.32	8.2	8.09	8.54	8.61	8.56	18.37	20.34	19.99	20.8	20.13	22.99	21.85	19.68	20.4	5.89139e-100	7.70419e-99
Bv5_104090_tfcp	black	106.999	PREDICTED: beta-carotene isomerase D27, chloroplastic [Beta vulgaris subsp. vulgaris]	GO:0008150(biological_process);GO:0009534(chloroplast thylakoid);GO:0009941(chloroplast envelope);GO:0016853(isomerase activity)	00906(Carotenoid biosynthesis)	K17911	EC:5.2.1.14	43.84	52.39	50.74	45.64	49.12	46.01	87.95	88.29	83.12	105.34	100.48	100.48	104.82	90.36	101.65	2.59735e-60	1.86723e-59
Bv8_202160_mcum	black	106.144	hypothetical protein BVRB_8g202160 [Beta vulgaris subsp. vulgaris]	NA	NA	NA	NA	1.02	1.04	1.07	3.17	2.47	3.2	0.45	0	0.37	0.52	0.55	0	0.52	0.44	1.09	0.000197349	0.000246672
Bv2_026610_rzcc	black	105.364	hypothetical protein BVRB_2g026610 [Beta vulgaris subsp. vulgaris]	NA	NA	NA	NA	3.76	7.38	3.83	7.72	8.31	7.06	3.24	2.37	2.21	2.04	2.39	1.74	1.94	2.68	4.06	5.33003e-11	9.79258e-11
Bv1_011650_hxfa	black	104.081	PREDICTED: sterol 3-beta-glucosyltransferase UGT80B1 [Beta vulgaris subsp. vulgaris]	GO:0009813(flavonoid biosynthetic process);GO:0016906(sterol 3-beta-glucosyltransferase activity);GO:0043231(intracellular membrane-bounded organelle);GO:0052696(flavonoid glucuronidation)	NA	NA	NA	8.21	10.33	10.21	7.77	9.32	8.63	0.75	0.75	1.01	0.44	0.87	0.92	3.03	2.63	2.55	3.10144e-111	4.66227e-110
Bv9_216440_udaa	black	103.958	PREDICTED: B-box zinc finger protein 19 isoform X2 [Beta vulgaris subsp. vulgaris]	GO:0005634(nucleus);GO:0006355(regulation of transcription, DNA-templated);GO:0009640(photomorphogenesis)	NA	NA	NA	11.38	10.51	11.32	22.42	23.28	22.85	6.59	5.35	7.44	7	1.66	6.22	7.53	1.19	10.85	6.34322e-06	8.71962e-06
Bv5_115760_amss	black	103.842	hypothetical protein BVRB_5g115760 [Beta vulgaris subsp. vulgaris]	GO:0005576(extracellular region);GO:0005618(cell wall);GO:0005886(plasma membrane);GO:0006952(defense response);GO:0009505(plant-type cell wall);GO:0030414(peptidase inhibitor activity);GO:0031640(killing of cells of other organism);GO:0050832(defense response to fungus)	NA	NA	NA	505.98	550.01	536.47	191.91	200.16	203.19	841.13	845.39	824.47	1160.47	1190.83	1205.26	1253.48	1325.96	1341.11	6.21477e-43	3.21624e-42
Bv3_053450_aieg	black	103.533	hypothetical protein BVRB_3g053450 [Beta vulgaris subsp. vulgaris]	GO:0004674(protein serine/threonine kinase activity);GO:0004842(ubiquitin-protein transferase activity);GO:0005524(ATP binding);GO:0005634(nucleus);GO:0006468(protein phosphorylation);GO:0006950(response to stress);GO:0016301(kinase activity);GO:0016567(protein ubiquitination);GO:0046777(protein autophosphorylation)	NA	NA	NA	2.15	2.75	1.75	3.58	3.26	2.54	0.84	0.79	0.56	0.34	0.57	0.59	1.79	1.1	1.59	2.1695e-20	6.02159e-20
Bv3_058070_ijjg	black	103.272	hypothetical protein BVRB_3g058070 [Beta vulgaris subsp. vulgaris]	GO:0005618(cell wall);GO:0033609(oxalate metabolic process);GO:0046564(oxalate decarboxylase activity)	NA	NA	NA	3.5	4.16	4.15	5.6	6.24	4.9	3.6	2.79	2.53	1.64	2.24	1.56	2.71	2.29	2.98	4.40454e-19	1.16621e-18
Bv3_061860_uwfi	black	102.854	PREDICTED: zeatin O-glucosyltransferase [Beta vulgaris subsp. vulgaris]	GO:0008194(UDP-glycosyltransferase activity);GO:0009813(flavonoid biosynthetic process);GO:0043231(intracellular membrane-bounded organelle);GO:0052696(flavonoid glucuronidation)	00908(Zeatin biosynthesis)	K13495	EC:2.4.1.215	10.2	12.66	12.7	20.36	20.5	22.73	8.95	8.43	8.79	0.87	0.95	1.19	1.15	1.14	1.18	0	0
Bv2_047530_uxwj	black	102.554	hypothetical protein BVRB_2g047530 [Beta vulgaris subsp. vulgaris]	GO:0005576(extracellular region);GO:0006869(lipid transport);GO:0008289(lipid binding)	NA	NA	NA	1.73	1.9	2.19	4.3	3.65	5.31	0.67	0.59	0.4	0.69	0.66	0.93	1.27	1.52	1.98	9.98729e-40	4.82447e-39
Bv3_052800_kpgn	black	101.208	PREDICTED: hevamine-A [Beta vulgaris subsp. vulgaris]	GO:0004568(chitinase activity);GO:0005576(extracellular region);GO:0006032(chitin catabolic process);GO:0008061(chitin binding)	00520(Amino sugar and nucleotide sugar metabolism)	K01183	EC:3.2.1.14	1.79	1.77	1.52	2.58	2.3	2.29	1.27	1.13	1.27	0.59	0.6	0.26	0.54	0.45	0.85	2.68469e-15	6.04534e-15
Bv4_096920_owjd	black	100.622	hypothetical protein BVRB_4g096920 [Beta vulgaris subsp. vulgaris]	NA	NA	NA	NA	1.49	2.07	1.78	1.27	1.91	1.36	4.9	3.12	5.02	4.61	4.9	4.02	4.89	4.16	4.62	1.2991e-16	3.11057e-16
Bv3_050900_nwce	black	97.2224	hypothetical protein BVRB_3g050900 [Beta vulgaris subsp. vulgaris]	NA	NA	NA	NA	3.03	3.2	1.79	3.61	4.02	3.8	1.58	0.86	1.34	1.29	1.23	1.14	2.07	2.22	2.04	4e-05	5.22512e-05
Bv7_179610_tysn	black	97.1062	PREDICTED: AP2-like ethylene-responsive transcription factor TOE3 [Beta vulgaris subsp. vulgaris]	GO:0003677(DNA binding);GO:0003700(DNA binding transcription factor activity);GO:0005634(nucleus);GO:0006351(transcription, DNA-templated);GO:0006355(regulation of transcription, DNA-templated);GO:0009908(flower development);GO:0010073(meristem maintenance);GO:0010093(specification of floral organ identity);GO:0019953(sexual reproduction);GO:0030154(cell differentiation);GO:0048316(seed developme…	NA	NA	NA	2.28	3.16	4.05	0.78	1.45	1.36	5.31	5.36	4.33	7.49	7.35	7.29	5.87	5.47	7.13	1.79546e-26	6.07856e-26
Bv8_200800_azaz	black	95.3113	PREDICTED: protein SRG1 [Beta vulgaris subsp. vulgaris]	GO:0051213(dioxygenase activity)	00941(Flavonoid biosynthesis)	K05278	EC:1.14.20.6	7.36	10.11	11.45	23.01	21.48	25.7	2.48	2.36	0.8	9.85	8.58	9.24	6.67	5.51	7.38	1.13324e-37	5.16633e-37
Bv4_089990_ssiu	black	94.0836	PREDICTED: transcription termination factor MTERF9, chloroplastic [Beta vulgaris subsp. vulgaris]	GO:0003690(double-stranded DNA binding);GO:0003727(single-stranded RNA binding);GO:0005739(mitochondrion);GO:0006353(DNA-templated transcription, termination);GO:0006355(regulation of transcription, DNA-templated);GO:0008380(RNA splicing);GO:0009507(chloroplast);GO:0009651(response to salt stress);GO:0009658(chloroplast organization);GO:0019843(rRNA binding);GO:0032502(developmental process);GO:0…	NA	NA	NA	14.42	16.21	15.48	7.67	7.53	7.62	23.33	21.71	22.1	17.43	15.52	15.1	20.72	18.23	18.98	8.30801e-68	6.77364e-67
Bv7_174000_fwyi	black	92.4571	PREDICTED: uncharacterized protein At3g17950 isoform X1 [Beta vulgaris subsp. vulgaris]	GO:0003674(molecular_function);GO:0005739(mitochondrion);GO:0005840(ribosome);GO:0008150(biological_process);GO:0008150(biological_process)	NA	NA	NA	33.4	34.23	38.88	18.27	16.49	18.49	38.31	44.86	37.86	53.72	55.22	54.42	57.13	53.19	56.35	2.23289e-62	1.66578e-61
Bv_005040_cxok	black	89.0618	PREDICTED: chlorophyll a-b binding protein CP24, chloroplastic [Beta vulgaris subsp. vulgaris]	GO:0009416(response to light stimulus);GO:0009535(chloroplast thylakoid membrane);GO:0009768(photosynthesis, light harvesting in photosystem I);GO:0009941(chloroplast envelope);GO:0010287(plastoglobule);GO:0016168(chlorophyll binding);GO:0031409(pigment binding)	00196(Photosynthesis - antenna proteins)	K08917	NA	82.8	89.01	97.36	23.37	25.98	26.93	151.75	151.66	160.45	95.16	88.7	94.63	132.14	114.57	127.1	4.54714e-55	2.96992e-54
Bv6_134640_pijf	black	88.1901	PREDICTED: L-ascorbate oxidase homolog [Beta vulgaris subsp. vulgaris]	GO:0005507(copper ion binding);GO:0009505(plant-type cell wall);GO:0009506(plasmodesma);GO:0016722(oxidoreductase activity, oxidizing metal ions)	NA	NA	NA	96.8	110.89	111.13	188.98	189.6	191.05	66.73	69.98	65.5	97.55	97.95	99.55	28.75	25.07	28.64	6.84391e-134	1.3171e-132
Bv4_095560_eare	black	85.3451	hypothetical protein BVRB_4g095560 [Beta vulgaris subsp. vulgaris]	NA	NA	NA	NA	14.4	15.75	16.29	29.45	31.17	28.66	10.52	10.18	9.24	15.75	14.6	13.68	3.76	3.58	3.36	3.44618e-146	7.48016e-145
Bv4_078940_oeac	black	83.9548	hypothetical protein BVRB_4g078940 [Beta vulgaris subsp. vulgaris]	NA	NA	NA	NA	26.62	28.97	19.71	35.3	36.38	40.97	16.86	17.95	13.62	7.38	7.23	7.94	16.48	18.99	24.84	6.7205e-35	2.86357e-34
Bv3_066530_wtnr	black	83.4101	PREDICTED: protein DETOXIFICATION 49 [Beta vulgaris subsp. vulgaris]	GO:0006855(drug transmembrane transport)	NA	NA	NA	58.41	68.36	72.34	132.54	127.1	139.54	43.08	44.21	45.09	68.76	60.1	63.49	15.62	14.03	16.53	4.08976e-188	1.23683e-186
Bv1_018450_pwat	black	82.6553	hypothetical protein BVRB_1g018450 isoform A [Beta vulgaris subsp. vulgaris];hypothetical protein BVRB_1g018450 isoform B [Beta vulgaris subsp. vulgaris]	NA	NA	NA	NA	3.16	3.03	2.91	0.99	1.15	1.45	5.2	4.07	4.02	3.56	3.41	2.69	3.65	4.52	4.78	1.86395e-23	5.74214e-23
Bv2_041730_nmtk	black	79.7166	hypothetical protein BVRB_2g041730 [Beta vulgaris subsp. vulgaris]	GO:0005515(protein binding);GO:0005524(ATP binding);GO:0005576(extracellular region);GO:0006952(defense response);GO:0043531(ADP binding)	NA	NA	NA	2.77	3.66	3.04	6.15	7.68	2.9	0.83	1.24	2.02	1.67	0.34	0.69	0.44	0.56	1.13	4.02371e-12	7.8037e-12
Bv8_199200_uhmq	black	78.5749	PREDICTED: uncharacterized protein LOC104909045 [Beta vulgaris subsp. vulgaris]	NA	NA	NA	NA	4.9	5.95	4.21	8.57	6.11	4.77	1.77	1.67	0.87	2.1	2.8	1.98	3.27	4.18	2.57	1.08126e-12	2.157e-12
Bv6_136510_auwd	black	78.4913	PREDICTED: alkane hydroxylase MAH1-like [Beta vulgaris subsp. vulgaris]	GO:0005576(extracellular region)	00073(Cutin, suberine and wax biosynthesis)	K15405	NA	7.59	9.1	7.19	9.53	10.93	9.65	5.81	5.67	5.24	3.79	3.85	3.55	7.1	7.37	6.33	3.28052e-20	9.03838e-20
Bv8_181250_jcna	black	78.0873	hypothetical protein BVRB_8g181250 [Beta vulgaris subsp. vulgaris]	NA	NA	NA	NA	0.11	1.21	1.27	1.58	2.4	2.31	0	0.27	0	0.79	0.67	0.55	0.55	0.37	0.41	7.32744e-05	9.40979e-05
Bv3_061180_ucfq	black	72.7007	PREDICTED: 1-aminocyclopropane-1-carboxylate oxidase homolog 1 [Beta vulgaris subsp. vulgaris]	GO:0051213(dioxygenase activity)	00402(Benzoxazinoid biosynthesis)	K13229	EC:1.14.11.59	30.27	38.43	38.55	44.36	46.61	44.75	29.89	32.04	31.11	14.78	14.89	14.38	15	15.28	17.24	1.95838e-82	2.03225e-81
Bv8_189700_tntc	black	72.1199	PREDICTED: transcription factor bHLH84 [Beta vulgaris subsp. vulgaris]	GO:0001046(core promoter sequence-specific DNA binding);GO:0001228(transcriptional activator activity, RNA polymerase II transcription regulatory region sequence-specific DNA binding);GO:0005634(nucleus);GO:0006366(transcription by RNA polymerase II)	04075(Plant hormone signal transduction);04712(Circadian rhythm - plant)	K12126	NA	4.49	5.53	4.33	2.75	0.86	1.86	6.83	7.01	7.41	4.97	5.1	4.36	7.61	5.68	7.12	1.10253e-10	1.99587e-10
Bv7_157730_wzhn	black	71.697	PREDICTED: lysM domain receptor-like kinase 3 isoform X2 [Beta vulgaris subsp. vulgaris]	GO:0005515(protein binding);GO:0005775(vacuolar lumen);GO:0005886(plasma membrane);GO:0009609(response to symbiotic bacterium);GO:0009877(nodulation);GO:0016301(kinase activity);GO:0046777(protein autophosphorylation)	04626(Plant-pathogen interaction)	K13429	NA	9.96	7.33	10.71	14.38	15.4	14.96	7.83	8.99	8.22	1.25	1.72	2.25	3.03	2.83	2.16	1.02868e-58	7.20796e-58
Bv9_216080_huct	black	65.9372	PREDICTED: PI-PLC X domain-containing protein At5g67130 isoform X1 [Beta vulgaris subsp. vulgaris]	GO:0005886(plasma membrane);GO:0006629(lipid metabolic process);GO:0008081(phosphoric diester hydrolase activity);GO:0009506(plasmodesma)	NA	NA	NA	4.91	6.5	8.47	7.42	7.32	10.01	3.11	3.86	2.44	2.76	4.47	4.29	3.99	2.35	6.36	0.00024539	0.000304962
Bv5_122140_pzmt	black	63.9027	hypothetical protein BVRB_5g122140 [Beta vulgaris subsp. vulgaris]	NA	NA	NA	NA	1.56	2.18	2.09	0.94	1.06	1.07	2.59	2.71	2.56	4.17	4.22	3.93	5.29	4.31	4.4	9.48315e-55	6.16696e-54
Bv4_071570_undk	black	63.1327	PREDICTED: probable plastid-lipid-associated protein 12, chloroplastic [Beta vulgaris subsp. vulgaris]	GO:0005198(structural molecule activity);GO:0009507(chloroplast);GO:0009534(chloroplast thylakoid);GO:0009535(chloroplast thylakoid membrane);GO:0009941(chloroplast envelope);GO:0016020(membrane)	NA	NA	NA	53.23	62.19	65.87	27.71	28.93	29.3	79.82	78.13	78.22	58.46	54.98	54.24	73.05	61.96	61.94	2.11757e-55	1.39013e-54
Bv8_194530_eonu	black	62.6711	PREDICTED: probable polygalacturonase At1g80170 isoform X1 [Beta vulgaris subsp. vulgaris]	GO:0004650(polygalacturonase activity);GO:0005515(protein binding);GO:0005576(extracellular region);GO:0005975(carbohydrate metabolic process);GO:0009505(plant-type cell wall);GO:0016829(lyase activity);GO:0071555(cell wall organization)	00040(Pentose and glucuronate interconversions)	K01213	EC:3.2.1.67	1.78	2.59	3.5	2.51	0.9	1.42	4.06	4.6	3.24	6.37	4.82	5.05	4.42	3.84	5.24	5.1483e-07	7.57965e-07
Bv6_134190_iwje	black	61.908	hypothetical protein BVRB_6g134190 [Beta vulgaris subsp. vulgaris]	NA	NA	NA	NA	0.46	0.47	0.61	0.46	0.39	0.29	0.47	1.16	1.12	1.27	1.31	1.09	1.22	0.98	1.04	1.20496e-06	1.73346e-06
Bv1_006470_ucuy	black	56.5352	hypothetical protein BVRB_1g006470 [Beta vulgaris subsp. vulgaris]	GO:0003700(DNA binding transcription factor activity);GO:0005634(nucleus);GO:0043565(sequence-specific DNA binding);GO:0044212(transcription regulatory region DNA binding);GO:0045893(positive regulation of transcription, DNA-templated)	NA	NA	NA	3.13	3.39	3.5	1.76	1.79	1.65	4.1	3.31	3.85	5.15	6.15	5.75	6.65	6.53	7	5.817e-37	2.61025e-36
Bv6_138950_rfoc	black	55.8617	PREDICTED: uncharacterized protein LOC104896057 [Beta vulgaris subsp. vulgaris]	GO:0003674(molecular_function);GO:0005739(mitochondrion);GO:0008150(biological_process)	NA	NA	NA	1.57	2.5	2.44	1.31	3.22	3.34	0.75	1.37	0.9	0.21	0.42	0.39	1.52	0.71	0.87	6.26898e-09	1.03319e-08
Bv9_214490_ofji	black	55.0024	PREDICTED: NAC domain-containing protein 86 [Beta vulgaris subsp. vulgaris]	GO:0003700(DNA binding transcription factor activity);GO:0005634(nucleus);GO:0006351(transcription, DNA-templated);GO:0006355(regulation of transcription, DNA-templated);GO:0007275(multicellular organism development);GO:0044212(transcription regulatory region DNA binding)	03013(RNA transport);03015(mRNA surveillance pathway);03018(RNA degradation)	K13126	NA	2.22	2.92	2.06	3.16	3.91	2.03	1.28	2.26	0.29	1.45	1.22	0.85	1	1.18	1.41	0.00904357	0.0101169
Bv6_139900_hhtf	black	53.27	PREDICTED: translin-associated protein X [Beta vulgaris subsp. vulgaris]	GO:0003677(DNA binding);GO:0005737(cytoplasm);GO:0008150(biological_process);GO:0009507(chloroplast);GO:0043565(sequence-specific DNA binding)	NA	NA	NA	24.48	29.18	28.48	40	43.02	39.5	13.62	14.54	12.77	29.55	29.36	28.51	25.99	23.83	25.8	1.03192e-61	7.582e-61
Bv6_156180_oeoo	black	51.597	hypothetical protein BVRB_6g156180 [Beta vulgaris subsp. vulgaris]	NA	NA	NA	NA	4.84	5.19	6.33	2.74	2.69	2.25	9.14	6.94	8.09	5.99	4.32	5.09	7.28	9.1	8.79	9.04217e-12	1.72375e-11
Bv4_085460_edjn	black	48.9438	hypothetical protein BVRB_4g085460 [Beta vulgaris subsp. vulgaris]	NA	NA	NA	NA	2.44	4.35	3.3	3.68	5.76	3.25	1.68	1.78	1.07	1.19	0.39	0.99	1.53	2.36	3.48	8.04294e-07	1.17101e-06
Bv6_142590_qptd	black	47.0637	PREDICTED: protein ACCELERATED CELL DEATH 6 [Beta vulgaris subsp. vulgaris]	NA	NA	NA	NA	1.78	1.62	1.85	2.54	4.09	2.14	1.73	0.81	1.06	0.91	0.62	0.97	1.71	1.28	1.61	7.09776e-05	9.12331e-05
Bv6_134630_rqij	black	43.7272	hypothetical protein BVRB_6g134630 [Beta vulgaris subsp. vulgaris]	NA	00740(Riboflavin metabolism);00790(Folate biosynthesis)	K14652	EC:4.1.99.12;EC:3.5.4.25	1.1	1.05	0.98	0.33	0.35	0.54	1.19	1.07	0.75	1.56	1.81	1.32	1.22	1.48	1.12	3.48802e-08	5.49544e-08
Bv4_093340_opwx	black	42.7782	PREDICTED: uncharacterized protein LOC104907247 [Beta vulgaris subsp. vulgaris]	GO:0003674(molecular_function);GO:0005634(nucleus);GO:0009611(response to wounding)	NA	NA	NA	3.85	5.09	3.41	7.47	8.06	7.14	5.87	4.81	4.17	1.64	2.4	1.9	2.87	2.9	2.85	1.06147e-19	2.87263e-19
Bv7_161810_truc	black	19.8751	PREDICTED: pentatricopeptide repeat-containing protein At4g02750-like [Beta vulgaris subsp. vulgaris]	GO:0005739(mitochondrion);GO:0008270(zinc ion binding)	NA	NA	NA	1.19	1.25	1.86	0.52	0.68	0.75	1.63	0.84	1.2	2.73	1.46	2.26	2.04	2.23	2.04	1.52147e-05	2.0437e-05
Bv3_051050_qrsy	blue	664.313	PREDICTED: two-component response regulator-like APRR5 isoform X1 [Beta vulgaris subsp. vulgaris];PREDICTED: two-component response regulator-like APRR5 isoform X2 [Beta vulgaris subsp. vulgaris]	GO:0000156(phosphorelay response regulator activity);GO:0000160(phosphorelay signal transduction system);GO:0003677(DNA binding);GO:0005515(protein binding);GO:0005634(nucleus);GO:0006351(transcription, DNA-templated);GO:0006355(regulation of transcription, DNA-templated);GO:0007623(circadian rhythm);GO:0009266(response to temperature stimulus);GO:0010017(red or far-red light signaling pathway);G…	04712(Circadian rhythm - plant);04712(Circadian rhythm - plant)	K12130	NA	4.22	5.13	4.59	1.26	1.77	0.95	33.21	30.87	31.71	30.53	31.35	29.36	96.81	89.69	95.21	0	0
Bv9_203980_yzjw	blue	658.634	PREDICTED: two-pore potassium channel 3 [Beta vulgaris subsp. vulgaris]	GO:0009705(plant-type vacuole membrane)	NA	NA	NA	0.63	0.67	0.3	0.93	1.53	0.71	10.89	10.24	11.49	12.17	12.02	13.12	31.23	28.72	29.43	7.3012e-197	2.36291e-195
Bv_010680_tsww	blue	656.489	PREDICTED: sulfate transporter 1.2 isoform X1 [Beta vulgaris subsp. vulgaris]	GO:0005887(integral component of plasma membrane);GO:0015116(sulfate transmembrane transporter activity)	NA	NA	NA	10.87	14.18	11.41	16.85	14.69	14.51	58.98	57.7	63.54	78.87	80.95	77.29	214.17	178.2	188.92	0	0
Bv7_175290_mott	blue	656.312	PREDICTED: gamma-interferon-inducible lysosomal thiol reductase-like [Beta vulgaris subsp. vulgaris]	GO:0003824(catalytic activity);GO:0005576(extracellular region);GO:0005773(vacuole);GO:0008150(biological_process)	NA	NA	NA	29.7	35.96	34.56	48.43	51.18	50.85	132.79	140.61	134.58	137.6	140.51	139.59	333.53	285.43	312.04	5.38436e-292	3.28428e-290
Bv7_175280_nczs	blue	654.429	PREDICTED: gamma-interferon-inducible lysosomal thiol reductase [Beta vulgaris subsp. vulgaris]	GO:0003824(catalytic activity);GO:0005576(extracellular region);GO:0005773(vacuole);GO:0008150(biological_process)	NA	NA	NA	0	0	0	0.34	0.83	0.12	18.81	16.95	14	18.76	18.57	20.28	56.19	44.95	50.65	1.34949e-272	7.38075e-271
Bv2_033120_umqq	blue	653.645	PREDICTED: vacuolar-processing enzyme [Beta vulgaris subsp. vulgaris]	GO:0004197(cysteine-type endopeptidase activity);GO:0006624(vacuolar protein processing);GO:0051603(proteolysis involved in cellular protein catabolic process)	NA	NA	NA	10.45	11.61	11.09	11.27	11.75	12.23	17.55	16.3	17.41	20.07	19.24	19.21	31.42	29	30.46	1.55206e-100	2.04749e-99
Bv6_133290_wkjd	blue	653.233	PREDICTED: pollen-specific leucine-rich repeat extensin-like protein 1 isoform X2 [Beta vulgaris subsp. vulgaris];PREDICTED: translation initiation factor IF-2 isoform X1 [Beta vulgaris subsp. vulgaris]	NA	NA	NA	NA	3.48	3.44	3.7	3.63	3.85	3.64	12.65	12.38	10.77	14.68	17.56	16.55	48.21	44.78	44.61	0	0
Bv3_049560_wxhc	blue	652.866	PREDICTED: uncharacterized protein LOC104887983 [Beta vulgaris subsp. vulgaris]	GO:0005634(nucleus)	NA	NA	NA	21.68	27.27	23.07	15.24	16.15	14.22	43.26	41.1	38.87	43.97	48.39	42.86	88.98	85.27	90.86	1.09363e-191	3.39875e-190
Bv3_069040_ryth	blue	652.453	PREDICTED: metal tolerance protein 4 [Beta vulgaris subsp. vulgaris]	GO:0005385(zinc ion transmembrane transporter activity);GO:0010043(response to zinc ion);GO:0016020(membrane);GO:0061088(regulation of sequestering of zinc ion)	NA	NA	NA	2.6	2.52	2.58	2.1	1.56	2.25	8.28	7.76	7.32	10.99	10.35	10.2	24.5	20.18	22.35	3.75872e-229	1.53366e-227
Bv5_118050_deeh	blue	651.313	PREDICTED: U-box domain-containing protein 52 [Beta vulgaris subsp. vulgaris]	NA	03440(Homologous recombination)	K03553	NA	7.4	6.93	7	9.15	9.74	10.16	19.04	19.25	18.9	23.47	22.4	21.17	44.83	40.34	41	9.61085e-191	2.96634e-189
Bv9_216730_patu	blue	650.371	PREDICTED: RING-H2 finger protein ATL74-like [Beta vulgaris subsp. vulgaris]	GO:0008270(zinc ion binding);GO:0016021(integral component of membrane);GO:0016567(protein ubiquitination);GO:0043161(proteasome-mediated ubiquitin-dependent protein catabolic process);GO:0046872(metal ion binding);GO:0061630(ubiquitin protein ligase activity)	NA	NA	NA	16.21	16.64	16.87	8.43	10.14	11.63	29.62	32.73	31.27	30.64	32.79	28.18	75.55	68.12	71.64	6.33277e-130	1.16754e-128
Bv8_183650_ietu	blue	647.302	PREDICTED: embryonic protein DC-8 isoform X1 [Beta vulgaris subsp. vulgaris]	NA	NA	NA	NA	1.29	2.18	1.63	9.3	10.03	8.51	91.09	94.78	88.78	78.11	89.79	83.27	216.89	211.26	239.77	0	0
Bv7_177350_yaxh	blue	645.253	PREDICTED: protein NRT1/ PTR FAMILY 5.8 isoform X1 [Beta vulgaris subsp. vulgaris];PREDICTED: protein NRT1/ PTR FAMILY 5.8 isoform X2 [Beta vulgaris subsp. vulgaris]	GO:0005215(transporter activity);GO:0005886(plasma membrane);GO:0006857(oligopeptide transport);GO:0016020(membrane);GO:0016021(integral component of membrane);GO:0022857(transmembrane transporter activity);GO:0055085(transmembrane transport);GO:0055085(transmembrane transport)	NA	NA	NA	6.21	7.11	7.99	8.32	8.14	8.61	12.35	11.48	13.33	12.56	13.52	12.19	24.55	23.86	24.24	1.25057e-51	7.65403e-51
Bv4_074190_ctkt	blue	642.583	PREDICTED: uncharacterized protein LOC104890133 isoform X1 [Beta vulgaris subsp. vulgaris]	NA	NA	NA	NA	0.32	0.49	0.38	8.19	7.97	8.61	21.9	21.54	23.15	23.14	24.16	24.56	74.72	61.68	70.69	0	0
Bv6_128690_ayqe	blue	639.855	PREDICTED: uncharacterized protein LOC104895017 [Beta vulgaris subsp. vulgaris]	GO:0003674(molecular_function);GO:0008150(biological_process);GO:0009507(chloroplast)	NA	NA	NA	0.05	0	0.1	0.56	1.06	0.75	1.61	2.28	1.86	2.45	2.65	2.41	8.19	7.26	8.34	1.95772e-138	3.95812e-137
Bv8_197250_xooq	blue	639.84	PREDICTED: uncharacterized protein LOC104902281 [Beta vulgaris subsp. vulgaris]	GO:0003674(molecular_function);GO:0005773(vacuole);GO:0010200(response to chitin)	04120(Ubiquitin mediated proteolysis)	K03350	NA	2.28	2.51	1.37	4.81	3.47	4.11	9.05	8.25	8.01	10.63	10.03	7.96	26.69	26.35	25.74	1.21023e-87	1.34592e-86
Bv3_070510_azad	blue	639.702	PREDICTED: transcription factor HY5-like [Beta vulgaris subsp. vulgaris]	GO:0000977(RNA polymerase II regulatory region sequence-specific DNA binding);GO:0003677(DNA binding);GO:0003700(DNA binding transcription factor activity);GO:0005515(protein binding);GO:0005634(nucleus);GO:0006351(transcription, DNA-templated);GO:0006355(regulation of transcription, DNA-templated);GO:0009585(red, far-red light phototransduction);GO:0010224(response to UV-B);GO:0080167(response t…	04712(Circadian rhythm - plant)	K16241	NA	0.24	0.29	0.22	0.53	0.37	0.37	0.78	0.89	0.73	1.1	1.14	1.19	2.49	2.42	2.76	5.60265e-50	3.34708e-49
Bv7_173880_sudx	blue	639.114	0	NA	NA	NA	NA	13.78	13.2	14.45	73.77	75.39	69.97	247.01	253.52	239.45	490.53	476.54	488.47	1305.79	1270.32	1244.25	0	0
Bv2_047680_gdsx	blue	638.714	PREDICTED: cystinosin homolog [Beta vulgaris subsp. vulgaris]	GO:0005774(vacuolar membrane);GO:0015184(L-cystine transmembrane transporter activity);GO:0015811(L-cystine transport)	NA	NA	NA	9.77	8.02	9.94	14.63	16.92	16.83	45.07	48.44	47.44	47	47.03	50.12	100.33	89.72	96.88	0	0
Bv2_042060_ccft	blue	634.878	PREDICTED: probable choline kinase 2 [Beta vulgaris subsp. vulgaris]	GO:0004103(choline kinase activity);GO:0005524(ATP binding);GO:0005737(cytoplasm);GO:0016310(phosphorylation)	00564(Glycerophospholipid metabolism)	K14156	EC:2.7.1.32;EC:2.7.1.82	1.36	1.1	1.24	1.55	1.04	1.22	3.36	2.98	3.27	5.89	6.03	5.17	16.84	16.54	17.63	1.15438e-194	3.65059e-193
Bv2_037070_iuww	blue	634.862	PREDICTED: probable sulfate transporter 4.2 [Beta vulgaris subsp. vulgaris]	GO:0005887(integral component of plasma membrane);GO:0015116(sulfate transmembrane transporter activity)	NA	NA	NA	26.01	29.13	29.27	33.21	32.59	31.33	55.3	53.75	52.32	55.24	53.38	51.63	157.25	141.93	156.58	3.33156e-125	5.8202e-124
Bv2_029700_pfgu	blue	634.47	PREDICTED: probable sodium-coupled neutral amino acid transporter 6 [Beta vulgaris subsp. vulgaris]	GO:0003333(amino acid transmembrane transport);GO:0015171(amino acid transmembrane transporter activity)	NA	NA	NA	13.76	15.79	16.45	24.03	26.11	25.15	44.84	42.89	44.96	56.52	50.76	56.74	176.48	165.19	178.43	0	0
Bv2_025860_yapd	blue	631.167	PREDICTED: uncharacterized protein LOC104905146 [Beta vulgaris subsp. vulgaris]	GO:0003674(molecular_function);GO:0005739(mitochondrion);GO:0008150(biological_process);GO:0016020(membrane)	00564(Glycerophospholipid metabolism);00565(Ether lipid metabolism);00440(Phosphonate and phosphinate metabolism)	K00993	EC:2.7.8.1	6.69	7.73	8.04	6.61	5.3	5.47	11.3	11.78	11.23	14.89	13.99	13.39	22.85	21.35	22.99	1.55222e-68	1.27888e-67
Bv6_140920_nhqt	blue	628.432	hypothetical protein BVRB_6g140920 [Beta vulgaris subsp. vulgaris]	GO:0005215(transporter activity);GO:0016021(integral component of membrane);GO:0055085(transmembrane transport)	NA	NA	NA	0	0.03	0.04	0.17	0.12	0.09	0.37	0.36	0.48	0.68	0.58	0.46	2.43	2.09	2.26	1.99063e-93	2.37214e-92
Bv6_150870_zwxc	blue	627.8	PREDICTED: cytochrome P450 78A5 [Beta vulgaris subsp. vulgaris]	GO:0016020(membrane);GO:0016709(oxidoreductase activity, acting on paired donors, with incorporation or reduction of molecular oxygen, NAD(P)H as one donor, and incorporation of one atom of oxygen);GO:0044550(secondary metabolite biosynthetic process)	NA	NA	NA	0.27	0.37	0.46	1.92	1.38	1.12	3.38	3.74	3.59	3.35	3.64	3.62	11.86	9.55	11.94	1.30608e-120	2.17406e-119
Bv5_102330_mhco	blue	627.666	PREDICTED: long-chain-alcohol oxidase FAO4A [Beta vulgaris subsp. vulgaris]	GO:0046577(long-chain-alcohol oxidase activity)	NA	NA	NA	0.81	0.61	0.74	10.41	11.55	8.95	47.78	44.79	45.73	117.36	119.99	114.28	296.7	290.1	298.07	0	0
Bv5_114340_qdqq	blue	627.398	PREDICTED: NEP1-interacting protein-like 2 [Beta vulgaris subsp. vulgaris]	GO:0006952(defense response);GO:0008270(zinc ion binding);GO:0010200(response to chitin);GO:0016021(integral component of membrane);GO:0046872(metal ion binding)	NA	NA	NA	2.12	2.55	2.98	1.97	2.16	1.73	4.11	4.12	4.06	4.34	4.3	4.59	8.11	6.84	7.58	5.55348e-46	3.04199e-45
Bv4_090150_gpni	blue	625.769	hypothetical protein BVRB_4g090150 [Beta vulgaris subsp. vulgaris]	NA	NA	NA	NA	0.48	0	0.22	0.3	0.06	0.51	3.03	2.67	1.96	2.47	3.4	2.44	12.05	12.65	13.32	6.68354e-38	3.06951e-37
Bv4_082520_yqtg	blue	624.65	PREDICTED: kinesin-like protein KIN-14U isoform X1 [Beta vulgaris subsp. vulgaris]	GO:0003777(microtubule motor activity);GO:0005871(kinesin complex);GO:0007018(microtubule-based movement);GO:0016887(ATPase activity)	NA	NA	NA	14.3	12.81	15.5	12.84	15.55	12.76	19.8	19.56	19.71	20.62	21.18	20.38	32.61	28.47	31.64	1.41105e-28	5.10259e-28
Bv3_050490_iorz	blue	623.975	PREDICTED: protein RESPONSE TO LOW SULFUR 2-like [Beta vulgaris subsp. vulgaris]	GO:0002229(defense response to oomycetes);GO:0003674(molecular_function);GO:0005634(nucleus);GO:0009651(response to salt stress);GO:0009658(chloroplast organization);GO:0010438(cellular response to sulfur starvation);GO:0031347(regulation of defense response);GO:0042742(defense response to bacterium);GO:0045893(positive regulation of transcription, DNA-templated);GO:0047484(regulation of response…	NA	NA	NA	0.86	0.44	0.55	1.31	0.89	1.05	6.89	6.01	5.96	7.77	6.58	6.42	27.88	30.92	32.16	1.81004e-280	1.03397e-278
Bv8_196260_ukur	blue	622.533	PREDICTED: heat stress transcription factor C-1 [Beta vulgaris subsp. vulgaris]	GO:0003677(DNA binding);GO:0003700(DNA binding transcription factor activity);GO:0005515(protein binding);GO:0005634(nucleus);GO:0006351(transcription, DNA-templated);GO:0006355(regulation of transcription, DNA-templated);GO:0043565(sequence-specific DNA binding);GO:0061408(positive regulation of transcription from RNA polymerase II promoter in response to heat stress)	NA	NA	NA	4.39	6.47	4.71	4.03	3.52	3.49	29.47	29.85	26.84	39.07	40.02	34.53	67.69	63.19	71.22	4.8155e-275	2.66615e-273
Bv6_128340_soya	blue	621.217	PREDICTED: CBL-interacting serine/threonine-protein kinase 11 [Beta vulgaris subsp. vulgaris]	GO:0004672(protein kinase activity);GO:0004674(protein serine/threonine kinase activity);GO:0005515(protein binding);GO:0005524(ATP binding);GO:0005622(intracellular);GO:0005886(plasma membrane);GO:0006468(protein phosphorylation);GO:0009268(response to pH);GO:0016301(kinase activity);GO:0018105(peptidyl-serine phosphorylation);GO:0018107(peptidyl-threonine phosphorylation);GO:0035556(intracellul…	NA	NA	NA	1.93	2.06	2.28	6.03	5.8	5.48	14.2	13.96	12.94	15.34	15.34	14.65	27.27	29.13	30.52	0	0
Bv5_102950_kxpz	blue	620.98	PREDICTED: early light-induced protein 2, chloroplastic isoform X3 [Beta vulgaris subsp. vulgaris]	GO:0009507(chloroplast);GO:0009522(photosystem I);GO:0009523(photosystem II);GO:0009535(chloroplast thylakoid membrane);GO:0010030(positive regulation of seed germination);GO:0010114(response to red light);GO:0010117(photoprotection);GO:0010218(response to far red light);GO:0010224(response to UV-B);GO:0010380(regulation of chlorophyll biosynthetic process);GO:0015979(photosynthesis);GO:0016021(i…	NA	NA	NA	0.57	0.87	0.74	1.73	2.39	2.18	10.56	9.7	10.67	14.33	14.27	15.72	76.97	68.43	71.66	0	0
Bv6_129190_jqgo	blue	620.96	PREDICTED: lipid phosphate phosphatase epsilon 1, chloroplastic isoform X1 [Beta vulgaris subsp. vulgaris]	GO:0006651(diacylglycerol biosynthetic process);GO:0008195(phosphatidate phosphatase activity);GO:0009507(chloroplast)	00510(N-Glycan biosynthesis)	K07252	EC:3.6.1.43	3.57	3.14	2.7	3.59	4.19	4.01	10.49	9.97	8.56	8.27	9.04	8.85	17.88	16.54	19.7	1.57402e-97	1.99738e-96
Bv7_171150_hihf	blue	620.572	PREDICTED: BEL1-like homeodomain protein 1 [Beta vulgaris subsp. vulgaris]	GO:0003677(DNA binding);GO:0003700(DNA binding transcription factor activity);GO:0005515(protein binding);GO:0005634(nucleus);GO:0005737(cytoplasm);GO:0006351(transcription, DNA-templated);GO:0006355(regulation of transcription, DNA-templated);GO:0009610(response to symbiotic fungus);GO:0009737(response to abscisic acid);GO:0010197(polar nucleus fusion);GO:0010201(response to continuous far red l…	NA	NA	NA	60.38	70.33	67.44	79.24	78.12	88.71	169.1	171.69	163.53	136.27	138.74	138.44	307.16	278.66	308.04	1.58067e-157	3.7873e-156
Bv6_152140_jnrj	blue	619.249	PREDICTED: zinc finger protein CONSTANS-LIKE 14 isoform X2 [Beta vulgaris subsp. vulgaris]	GO:0003700(DNA binding transcription factor activity);GO:0005515(protein binding);GO:0005634(nucleus);GO:0006355(regulation of transcription, DNA-templated);GO:0007623(circadian rhythm);GO:0008270(zinc ion binding);GO:0048579(negative regulation of long-day photoperiodism, flowering)	04712(Circadian rhythm - plant)	K12135	NA	42.93	48.77	45.22	20.84	22.43	20.78	70.8	66.37	67.07	61.01	65.02	56.1	157.46	155.2	166.75	5.14069e-235	2.17651e-233
Bv6_139660_wjii	blue	619.138	PREDICTED: homeobox-leucine zipper protein ATHB-40 [Beta vulgaris subsp. vulgaris]	GO:0003677(DNA binding);GO:0003700(DNA binding transcription factor activity);GO:0005634(nucleus);GO:0006351(transcription, DNA-templated);GO:0006355(regulation of transcription, DNA-templated);GO:0009733(response to auxin);GO:0043565(sequence-specific DNA binding)	NA	NA	NA	0	0.29	0.33	1.49	1.48	1.24	2.16	1.97	2.06	3.23	3.72	3.1	10.22	9.07	10.64	8.32272e-80	8.28772e-79
Bv3_055340_mthf	blue	618.822	PREDICTED: uncharacterized protein LOC104888551 [Beta vulgaris subsp. vulgaris]	GO:0003674(molecular_function);GO:0008150(biological_process)	NA	NA	NA	3.17	3.89	2.87	5.57	4.73	5.65	5.9	7.63	7.79	8.67	8.74	8.93	18.1	18.05	18.93	2.95426e-50	1.76784e-49
Bv4_097640_szor	blue	617.557	PREDICTED: nuclear transcription factor Y subunit A-10 [Beta vulgaris subsp. vulgaris]	GO:0003677(DNA binding);GO:0003700(DNA binding transcription factor activity);GO:0005634(nucleus);GO:0006351(transcription, DNA-templated);GO:0006355(regulation of transcription, DNA-templated);GO:0009567(double fertilization forming a zygote and endosperm);GO:0016602(CCAAT-binding factor complex)	NA	NA	NA	2.23	2.37	1.66	1.49	1.29	1.48	2.99	3.02	2.69	2.9	2.58	2.83	6.71	6.37	7.08	2.54044e-45	1.37193e-44
Bv3_063480_uapn	blue	617.552	PREDICTED: cytochrome P450 94A1 [Beta vulgaris subsp. vulgaris]	GO:0004497(monooxygenase activity);GO:0005506(iron ion binding);GO:0009507(chloroplast);GO:0016705(oxidoreductase activity, acting on paired donors, with incorporation or reduction of molecular oxygen);GO:0019825(oxygen binding);GO:0020037(heme binding);GO:0055114(oxidation-reduction process)	00073(Cutin, suberine and wax biosynthesis)	K13407	EC:1.14.-.-	0.69	0.64	0.66	0.77	0.69	0.92	1.38	1.31	1.48	1.85	1.74	1.79	4.89	3.78	4.04	5.19887e-60	3.72555e-59
Bv8_193210_aexx	blue	615.544	PREDICTED: protein SRG1 [Beta vulgaris subsp. vulgaris]	GO:0051213(dioxygenase activity)	00941(Flavonoid biosynthesis)	K05278	EC:1.14.20.6	18.87	16.74	15.76	24.55	28.44	25.79	32.17	34.2	31.9	38.65	41.78	39.09	71.38	68.17	69.45	1.26207e-79	1.25329e-78
Bv3_049550_ujsq	blue	615.22	hypothetical protein BVRB_3g049550 [Beta vulgaris subsp. vulgaris]	GO:0016746(transferase activity, transferring acyl groups);GO:0080167(response to karrikin)	NA	NA	NA	2.8	3	3.17	5.29	5.82	4.86	19.28	16.45	17.47	13.81	15.27	12.36	68.79	65.26	64.2	0	0
Bv5_102310_mqzq	blue	615.147	PREDICTED: uncharacterized protein LOC104892453 [Beta vulgaris subsp. vulgaris]	GO:0003674(molecular_function);GO:0005886(plasma membrane);GO:0008150(biological_process);GO:0009941(chloroplast envelope);GO:0016021(integral component of membrane)	NA	NA	NA	8.84	8.51	7.65	25.5	22.1	20.4	72.35	68.2	72.3	83.14	84.84	84.7	155.06	138.82	148.83	0	0
Bv4_087890_powm	blue	614.585	PREDICTED: cellulose synthase-like protein G2 [Beta vulgaris subsp. vulgaris]	GO:0000139(Golgi membrane);GO:0000271(polysaccharide biosynthetic process);GO:0000977(RNA polymerase II regulatory region sequence-specific DNA binding);GO:0005794(Golgi apparatus);GO:0005886(plasma membrane);GO:0009833(plant-type primary cell wall biogenesis);GO:0016021(integral component of membrane);GO:0016740(transferase activity);GO:0016757(transferase activity, transferring glycosyl groups)…	NA	NA	NA	0.81	0.91	1.3	6.07	4.96	4.87	9.08	9.09	9.52	10.9	12.71	11.03	44.47	42.91	48.48	2e-302	1e-300
Bv5_103660_nxgt	blue	614.151	PREDICTED: transcription factor bHLH157 [Beta vulgaris subsp. vulgaris]	GO:0004674(protein serine/threonine kinase activity);GO:0005829(cytosol);GO:0006468(protein phosphorylation);GO:0035556(intracellular signal transduction)	NA	NA	NA	15.83	15.53	15.21	24.43	20.9	22.85	40.78	42.58	41.88	34.62	34.05	33.39	81.48	75.43	80.34	5.48711e-197	1.77901e-195
Bv1_015970_khmk	blue	613.86	PREDICTED: protein DAMAGED DNA-BINDING 2 [Beta vulgaris subsp. vulgaris]	GO:0000166(nucleotide binding);GO:0005515(protein binding);GO:0005634(nucleus);GO:0006281(DNA repair);GO:0008270(zinc ion binding);GO:0010224(response to UV-B);GO:0016567(protein ubiquitination);GO:0080008(Cul4-RING E3 ubiquitin ligase complex)	04120(Ubiquitin mediated proteolysis);03420(Nucleotide excision repair)	K10140	NA	12.91	14.95	16.22	15.49	13.73	13.52	22.07	21.8	24.67	24.31	23.86	23.25	37.97	34.6	34.39	2.66253e-34	1.11834e-33
Bv3_048130_xzkr	blue	612.948	PREDICTED: uncharacterized protein LOC104887860 isoform X1 [Beta vulgaris subsp. vulgaris];hypothetical protein BVRB_3g048130 isoform B [Beta vulgaris subsp. vulgaris]	GO:0005737(cytoplasm);GO:0008757(S-adenosylmethionine-dependent methyltransferase activity);GO:0032259(methylation);GO:0032259(methylation)	NA	NA	NA	9.35	9.07	10.04	9.71	9.71	8.34	11.94	11.64	11.65	17.41	16.8	16.21	30.5	26.3	29.22	2.86339e-64	2.21038e-63
Bv2_023680_fnft	blue	612.926	PREDICTED: protein SMAX1-LIKE 8 [Beta vulgaris subsp. vulgaris]	GO:0005634(nucleus);GO:0005737(cytoplasm);GO:1902347(response to strigolactone)	NA	NA	NA	5.45	5.4	4.79	3.27	3.72	3.39	7.48	6.02	6.58	9.25	9.91	9.61	16.76	16.04	16.82	1.58978e-84	1.69169e-83
Bv6_128010_ggos	blue	610.554	PREDICTED: uncharacterized protein LOC104894936 isoform X2 [Beta vulgaris subsp. vulgaris]	GO:0004328(formamidase activity);GO:0005773(vacuole)	00630(Glyoxylate and dicarboxylate metabolism);00910(Nitrogen metabolism);00460(Cyanoamino acid metabolism)	K01455	EC:3.5.1.49	21.63	24.91	21.98	23.94	26.38	22.46	28.54	28.44	30.3	30.78	30.86	35.81	63.2	55.13	60.41	1.07551e-51	6.58929e-51
Bv8_181880_cgpy	blue	610.135	PREDICTED: uncharacterized protein LOC104900575 [Beta vulgaris subsp. vulgaris]	NA	NA	NA	NA	0.51	1.18	0.63	0.69	1.42	0.75	2.72	2.37	2.31	2.46	2.57	3.07	13.27	12.22	13.54	7.11253e-69	5.92513e-68
Bv4_091080_gehh	blue	609.277	PREDICTED: BTB/POZ domain-containing protein At1g55760 [Beta vulgaris subsp. vulgaris]	GO:0005515(protein binding);GO:0005737(cytoplasm);GO:0031463(Cul3-RING ubiquitin ligase complex);GO:0043161(proteasome-mediated ubiquitin-dependent protein catabolic process)	NA	NA	NA	6.77	8.06	7.22	12.71	12.96	12.11	39.73	44.04	41.47	43.94	47.06	42.41	83.38	70.98	79.22	0	0
Bv9_216750_ajsi	blue	609.129	PREDICTED: non-specific lipid-transfer protein [Beta vulgaris subsp. vulgaris]	GO:0005576(extracellular region);GO:0006869(lipid transport);GO:0008289(lipid binding)	NA	NA	NA	0.24	0.21	0	0.44	0.67	1.15	3.47	4.08	4.8	4.59	3.11	3.71	24.27	22.28	22.91	3.9508e-132	7.45186e-131
Bv1_001310_nkgu	blue	608.079	PREDICTED: ATP-dependent DNA helicase mph1 isoform X1 [Beta vulgaris subsp. vulgaris]	GO:0004674(protein serine/threonine kinase activity);GO:0005886(plasma membrane);GO:0006468(protein phosphorylation);GO:0006952(defense response);GO:0009506(plasmodesma);GO:0009506(plasmodesma)	NA	NA	NA	3.28	3.48	3.61	2.82	2.65	3.53	4.43	5.3	4.72	6.68	7.29	7.02	12.39	10.58	12.65	1.98174e-52	1.23346e-51
Bv9_206210_rcfg	blue	606.637	PREDICTED: zinc finger protein ZAT5 [Beta vulgaris subsp. vulgaris]	GO:0003700(DNA binding transcription factor activity);GO:0005634(nucleus);GO:0043565(sequence-specific DNA binding);GO:0044212(transcription regulatory region DNA binding)	NA	NA	NA	2.04	2.5	2.76	1.9	3.12	3.95	7.1	6.81	5.17	6.1	5.61	6.41	21.15	21.28	19.17	5.31822e-54	3.40798e-53
Bv5_100240_fyeq	blue	606.507	PREDICTED: E3 ubiquitin-protein ligase RHA1B-like [Beta vulgaris subsp. vulgaris]	GO:0005634(nucleus);GO:0008270(zinc ion binding);GO:0009741(response to brassinosteroid);GO:0010200(response to chitin);GO:0016021(integral component of membrane);GO:0016567(protein ubiquitination);GO:0043161(proteasome-mediated ubiquitin-dependent protein catabolic process);GO:0061630(ubiquitin protein ligase activity)	NA	NA	NA	23.86	24.73	27.24	13.42	15.46	13.04	30.74	29.28	28.88	33.94	34.65	35.06	62.05	59.96	67.12	1.05171e-108	1.53857e-107
Bv5_117680_iykf	blue	605.974	PREDICTED: short-chain dehydrogenase TIC 32, chloroplastic [Beta vulgaris subsp. vulgaris]	GO:0005634(nucleus);GO:0016491(oxidoreductase activity);GO:0055114(oxidation-reduction process)	NA	NA	NA	1.08	0.8	1.54	0.78	1.09	0.91	3.69	2.81	2.3	3.98	4.81	3.51	11.15	9.49	8.63	9.96972e-54	6.35477e-53
Bv5_103710_xayd	blue	605.641	PREDICTED: oligopeptide transporter 7 isoform X1 [Beta vulgaris subsp. vulgaris]	GO:0005887(integral component of plasma membrane);GO:0006857(oligopeptide transport);GO:0015031(protein transport);GO:0016020(membrane);GO:0016021(integral component of membrane);GO:0035673(oligopeptide transmembrane transporter activity);GO:0055085(transmembrane transport)	NA	NA	NA	3.5	3.81	4.27	1.16	2.08	1.74	6.28	7.76	7.26	6.67	6.44	6.98	30.34	24.07	26.58	1.49079e-138	3.01747e-137
Bv5_119130_hdhi	blue	605.231	PREDICTED: F-box/LRR-repeat protein 12 isoform X2 [Beta vulgaris subsp. vulgaris]	GO:0004842(ubiquitin-protein transferase activity);GO:0005634(nucleus);GO:0006511(ubiquitin-dependent protein catabolic process)	NA	NA	NA	2.41	2.45	2.78	3.53	3.27	3.45	5.56	4.81	5.32	4.93	4.61	4.94	9.19	9.68	9.04	2.69167e-44	1.42746e-43
Bv5_118060_ttqx	blue	605.178	PREDICTED: ferric reduction oxidase 8, mitochondrial isoform X1 [Beta vulgaris subsp. vulgaris]	GO:0000293(ferric-chelate reductase activity);GO:0005739(mitochondrion);GO:0005886(plasma membrane);GO:0006811(ion transport);GO:0016020(membrane);GO:0016021(integral component of membrane);GO:0016491(oxidoreductase activity);GO:0031966(mitochondrial membrane);GO:0046872(metal ion binding);GO:0055114(oxidation-reduction process);GO:0055114(oxidation-reduction process)	NA	NA	NA	23.91	23.56	21.82	26.72	28.28	26.83	42.56	42.83	39.84	55.02	54.44	51.7	86.64	75.52	76.69	5.52354e-145	1.17901e-143
Bv5_102940_qcrz	blue	603.657	PREDICTED: early light-induced protein 2, chloroplastic isoform X1 [Beta vulgaris subsp. vulgaris]	GO:0009507(chloroplast);GO:0009522(photosystem I);GO:0009523(photosystem II);GO:0009535(chloroplast thylakoid membrane);GO:0010030(positive regulation of seed germination);GO:0010114(response to red light);GO:0010117(photoprotection);GO:0010218(response to far red light);GO:0010224(response to UV-B);GO:0010380(regulation of chlorophyll biosynthetic process);GO:0015979(photosynthesis);GO:0016021(i…	NA	NA	NA	3.41	3.47	3.92	4.65	3.44	5.11	11.4	11.04	10.98	13.19	12.59	12.36	68.83	63.71	71.06	0	0
Bv6_155180_ytax	blue	603.352	PREDICTED: anthocyanidin 3-O-glucoside 2'''-O-xylosyltransferase [Beta vulgaris subsp. vulgaris]	GO:0009813(flavonoid biosynthetic process);GO:0043231(intracellular membrane-bounded organelle);GO:0052696(flavonoid glucuronidation);GO:0080043(quercetin 3-O-glucosyltransferase activity);GO:0080044(quercetin 7-O-glucosyltransferase activity)	00942(Anthocyanin biosynthesis)	K17193	EC:2.4.2.51	13.48	16.84	16.09	20.49	24.19	24.69	25.15	29.58	25.35	32.92	34	39.28	86.16	76.84	87.79	4.6982e-97	5.89947e-96
Bv3_062570_gixt	blue	602.828	PREDICTED: haloacid dehalogenase-like hydrolase domain-containing protein 3 [Beta vulgaris subsp. vulgaris]	GO:0008152(metabolic process);GO:0016787(hydrolase activity)	00520(Amino sugar and nucleotide sugar metabolism)	K01097	EC:3.1.3.29	9.77	12.19	10.81	10.06	11.39	11.21	13.87	11.44	13.94	13.75	14.34	13.4	25.53	25.31	26.27	3.03408e-34	1.27291e-33
Bv6_141520_usyi	blue	602.423	PREDICTED: transcription factor MYB108 [Beta vulgaris subsp. vulgaris]	GO:0000981(RNA polymerase II transcription factor activity, sequence-specific DNA binding);GO:0001135(transcription factor activity, RNA polymerase II transcription factor recruiting);GO:0003677(DNA binding);GO:0003700(DNA binding transcription factor activity);GO:0005634(nucleus);GO:0006355(regulation of transcription, DNA-templated);GO:0006357(regulation of transcription by RNA polymerase II);G…	NA	NA	NA	3.91	5.52	4.98	1.56	2.08	2.32	5.64	6.12	5.35	6.35	7.4	7.93	26.25	22.46	23.67	9.5677e-109	1.40082e-107
Bv5_102960_daor	blue	601.585	PREDICTED: early light-induced protein 1, chloroplastic [Beta vulgaris subsp. vulgaris]	GO:0009409(response to cold);GO:0009507(chloroplast);GO:0009522(photosystem I);GO:0009523(photosystem II);GO:0009535(chloroplast thylakoid membrane);GO:0010030(positive regulation of seed germination);GO:0010117(photoprotection);GO:0010380(regulation of chlorophyll biosynthetic process);GO:0015979(photosynthesis);GO:0016021(integral component of membrane);GO:0016168(chlorophyll binding);GO:003460…	NA	NA	NA	0.42	0.54	0.59	0.74	0.77	0.72	1.12	0.95	0.61	1.32	1.54	1.36	3.77	3.27	3.73	8.99629e-44	4.72502e-43
Bv3_050500_cqas	blue	600.977	PREDICTED: protein RESPONSE TO LOW SULFUR 3 [Beta vulgaris subsp. vulgaris]	GO:0002229(defense response to oomycetes);GO:0003674(molecular_function);GO:0005634(nucleus);GO:0009651(response to salt stress);GO:0009658(chloroplast organization);GO:0010438(cellular response to sulfur starvation);GO:0031347(regulation of defense response);GO:0042742(defense response to bacterium);GO:0045893(positive regulation of transcription, DNA-templated);GO:0047484(regulation of response…	NA	NA	NA	0.88	0.58	0.26	4.91	5.65	5.12	9.7	9.55	9.88	10.21	10.65	9.83	45.81	47.99	49.95	0	0
Bv2_024740_cpid	blue	600.294	hypothetical protein BVRB_2g024740 [Beta vulgaris subsp. vulgaris]	NA	NA	NA	NA	71.81	84.5	74.24	66.31	64.03	60.07	109.07	106.55	98.71	117.27	121.48	109.07	157.79	165.19	171.39	9.38204e-14	1.96669e-13
Bv1_022450_ieyq	blue	599.187	PREDICTED: E3 ubiquitin-protein ligase ATL23 [Beta vulgaris subsp. vulgaris]	GO:0043161(proteasome-mediated ubiquitin-dependent protein catabolic process);GO:0061630(ubiquitin protein ligase activity)	NA	NA	NA	2.55	2.93	2.5	0.9	0.87	0.78	3.67	3.38	3.31	6.51	6.25	5.87	12.4	11.09	11.84	1.35535e-153	3.15501e-152
Bv3_063010_urxj	blue	598.754	PREDICTED: uncharacterized protein LOC104889496 [Beta vulgaris subsp. vulgaris]	GO:0061720(6-sulfoquinovose(1-) catabolic process to glycerone phosphate and 3-sulfolactaldehyde);GO:1990929(sulfoquinovosidase activity)	00052(Galactose metabolism);00500(Starch and sucrose metabolism)	K01187	EC:3.2.1.20	5.05	5.12	4.6	3.03	2.91	2.96	15.05	15.34	16.51	15.63	14.82	17.24	101.15	100.15	103.88	0	0
Bv7_166200_wqqw	blue	598.109	PREDICTED: cystinosin homolog [Beta vulgaris subsp. vulgaris]	GO:0005774(vacuolar membrane);GO:0015184(L-cystine transmembrane transporter activity);GO:0015811(L-cystine transport)	NA	NA	NA	5.16	4.87	5.15	5.91	5.82	4.92	18.35	17.32	17	23.58	21.3	22.69	140.85	127.1	142.06	0	0
Bv2_047400_jnmu	blue	596.454	PREDICTED: uncharacterized protein LOC104906318 [Beta vulgaris subsp. vulgaris]	GO:0003674(molecular_function);GO:0005618(cell wall);GO:0005634(nucleus);GO:0008150(biological_process)	NA	NA	NA	3.44	3.48	4.04	2.41	2.93	2.98	5.57	6.76	5.34	6.17	7.11	6.76	10.09	10.58	11.24	9.24889e-34	3.83378e-33
Bv4_071710_xxkn	blue	596.36	PREDICTED: bromodomain-containing protein DDB_G0280777 [Beta vulgaris subsp. vulgaris]	GO:0003677(DNA binding);GO:0005634(nucleus)	NA	NA	NA	4.52	4.55	4.69	4.32	3.87	3.44	6.41	6.92	6.75	7.87	8.28	6.49	11.04	12.38	12.18	7.48348e-44	3.93851e-43
Bv8_201320_uhez	blue	596.356	PREDICTED: alkaline ceramidase 3 [Beta vulgaris subsp. vulgaris]	GO:0000139(Golgi membrane);GO:0002238(response to molecule of fungal origin);GO:0003824(catalytic activity);GO:0005634(nucleus);GO:0005783(endoplasmic reticulum);GO:0005789(endoplasmic reticulum membrane);GO:0005794(Golgi apparatus);GO:0006672(ceramide metabolic process);GO:0007275(multicellular organism development);GO:0009651(response to salt stress);GO:0009737(response to abscisic acid);GO:000…	00600(Sphingolipid metabolism)	K04711	EC:3.5.1.-	12.78	14.09	14.11	9.79	10.75	8.25	21.41	20.77	17.94	20.04	18.67	18.3	31.59	30.92	33.61	9.34342e-43	4.81184e-42
Bv1_007380_taoh	blue	596.344	PREDICTED: IAA-amino acid hydrolase ILR1-like 6 [Beta vulgaris subsp. vulgaris]	GO:0005576(extracellular region);GO:0006508(proteolysis);GO:0008237(metallopeptidase activity);GO:0009694(jasmonic acid metabolic process);GO:0009753(response to jasmonic acid);GO:0009850(auxin metabolic process);GO:0010112(regulation of systemic acquired resistance);GO:0010178(IAA-amino acid conjugate hydrolase activity);GO:0046872(metal ion binding);GO:1990206(jasmonyl-Ile conjugate hydrolase a…	NA	NA	NA	19.26	20.05	21.8	11.46	12.48	12.07	25.32	27.63	23.44	23.63	25.26	24.34	48.5	44.44	47.63	2.20488e-126	3.92041e-125
Bv3_049390_hnsi	blue	596.042	PREDICTED: 1-aminocyclopropane-1-carboxylate oxidase homolog 1 [Beta vulgaris subsp. vulgaris]	GO:0051213(dioxygenase activity)	00940(Phenylpropanoid biosynthesis)	K06892	EC:1.14.11.-	67.74	76.05	70.7	65.93	70.75	59.22	141.67	135.55	138.68	147.44	147.56	146.91	211.65	211.27	216.41	1.94735e-129	3.56466e-128
Bv4_085840_gucu	blue	595.386	PREDICTED: protein DMR6-LIKE OXYGENASE 1 [Beta vulgaris subsp. vulgaris]	GO:0051213(dioxygenase activity)	00941(Flavonoid biosynthesis)	K05278	EC:1.14.20.6	1.97	1.44	2.03	1.38	1.73	1.77	2.37	2.81	2.38	2.89	3.03	2.65	4.71	4.33	4.37	2.06104e-22	6.14521e-22
Bv1_019950_ktmf	blue	595.273	PREDICTED: two-component response regulator ARR10-like isoform X1 [Beta vulgaris subsp. vulgaris]	NA	04075(Plant hormone signal transduction)	K14491	NA	4.22	3.99	4.64	4	4.67	4.55	6.73	7.23	5.28	7.02	6.64	7.12	10.81	9.67	10.43	6.56871e-16	1.5212e-15
Bv2_033700_csii	blue	594.782	PREDICTED: uncharacterized protein LOC104886547 isoform X1 [Beta vulgaris subsp. vulgaris]	GO:0003674(molecular_function);GO:0005634(nucleus);GO:0005773(vacuole);GO:0008150(biological_process)	NA	NA	NA	53.57	57.46	57.97	39.73	41.15	38.61	87.68	78.92	79.41	70.64	77.2	75.63	125.94	127.96	131.6	1.39189e-108	2.03292e-107
Bv4_080180_apta	blue	593.183	PREDICTED: probable glycerol-3-phosphate acyltransferase 2 [Beta vulgaris subsp. vulgaris]	GO:0010143(cutin biosynthetic process);GO:0016020(membrane);GO:0016311(dephosphorylation);GO:0016791(phosphatase activity);GO:0090447(glycerol-3-phosphate 2-O-acyltransferase activity)	00561(Glycerolipid metabolism);00564(Glycerophospholipid metabolism)	K13508	EC:2.3.1.15;EC:2.3.1.198	0.02	0.06	0.05	0.29	0.08	0.15	0.43	0.27	0.17	1.14	0.89	0.88	2.88	2.42	2.83	2.94078e-48	1.69713e-47
Bv8_191670_hekr	blue	591.841	PREDICTED: subtilisin-like protease SBT1.9 [Beta vulgaris subsp. vulgaris]	GO:0004252(serine-type endopeptidase activity);GO:0005618(cell wall)	NA	NA	NA	8.57	9.27	9.34	5.68	6.62	8.06	17.15	16.83	16.49	13.77	14.23	13.98	27.27	24.68	27.3	1.56649e-48	9.08684e-48
Bv5_104240_omew	blue	590.756	PREDICTED: glucan endo-1,3-beta-glucosidase 11 [Beta vulgaris subsp. vulgaris]	GO:0007154(cell communication);GO:0009505(plant-type cell wall);GO:0030247(polysaccharide binding);GO:0042973(glucan endo-1,3-beta-D-glucosidase activity);GO:0046658(anchored component of plasma membrane)	00500(Starch and sucrose metabolism)	K19891	EC:3.2.1.39	13.23	15.06	15.19	31.05	30.04	28.5	60.31	60.94	57.84	48.6	49.48	46.87	106.51	109.8	107	0	0
Bv4_072220_zfoe	blue	590.483	PREDICTED: transcription factor bHLH130 [Beta vulgaris subsp. vulgaris]	GO:0001046(core promoter sequence-specific DNA binding);GO:0001228(transcriptional activator activity, RNA polymerase II transcription regulatory region sequence-specific DNA binding);GO:0005634(nucleus);GO:0006366(transcription by RNA polymerase II)	NA	NA	NA	54.85	66.82	62.65	72.92	70.47	66.5	89.24	93.95	85.05	91.69	88.98	92.88	131.79	115.8	125.34	1.17691e-21	3.42565e-21
Bv1_016500_wcju	blue	589.231	PREDICTED: uncharacterized protein LOC104905132 [Beta vulgaris subsp. vulgaris]	GO:0003674(molecular_function);GO:0005576(extracellular region);GO:0008150(biological_process);GO:0016021(integral component of membrane)	NA	NA	NA	2.41	2.7	3.33	2.54	2.06	1.78	4.39	5.4	5.04	5.37	4.85	4.67	8.31	7.94	9.62	1.27393e-26	4.3341e-26
Bv4_092000_neqc	blue	588.783	PREDICTED: protein NDR1 [Beta vulgaris subsp. vulgaris]	GO:0006952(defense response);GO:0009506(plasmodesma);GO:0046658(anchored component of plasma membrane)	NA	NA	NA	15.82	19.8	16.24	18.75	20.17	19.2	14.17	14.18	12.92	12.34	12.01	11.88	3.49	3.22	2.95	1.06762e-102	1.44987e-101
Bv9_223650_jpaf	blue	588.192	hypothetical protein BVRB_9g223650 [Beta vulgaris subsp. vulgaris]	GO:0003674(molecular_function);GO:0005575(cellular_component);GO:0008150(biological_process)	NA	NA	NA	2.42	2.69	2.16	7.62	9.23	7.46	11.05	8.1	10.95	21.42	20	18.89	86.06	88.3	90.02	3.48225e-259	1.7601e-257
Bv1_014920_skmi	blue	588.182	PREDICTED: uncharacterized protein LOC104901936 [Beta vulgaris subsp. vulgaris]	NA	03008(Ribosome biogenesis in eukaryotes)	K14548	NA	0.86	0.46	0.68	3.12	3.39	2.36	3.44	4.33	3.6	6.19	4.7	4.81	23.59	22.62	24.75	1.09714e-157	2.63226e-156
Bv4_076180_uhwr	blue	587.943	hypothetical protein BVRB_4g076180 [Beta vulgaris subsp. vulgaris]	GO:0004630(phospholipase D activity);GO:0005737(cytoplasm);GO:0006654(phosphatidic acid biosynthetic process);GO:0008610(lipid biosynthetic process);GO:0016036(cellular response to phosphate starvation);GO:0016042(lipid catabolic process);GO:0031410(cytoplasmic vesicle);GO:0035091(phosphatidylinositol binding);GO:0048017(inositol lipid-mediated signaling);GO:0048364(root development);GO:0070290(N…	00564(Glycerophospholipid metabolism);00565(Ether lipid metabolism);04144(Endocytosis)	K01115	EC:3.1.4.4	2.63	2.12	4.07	2.14	2.24	1.98	5.18	6.94	6.83	8.37	7.47	6.8	14.76	13.29	12.26	3.94502e-36	1.72843e-35
Bv6_154440_tuon	blue	587.936	hypothetical protein BVRB_6g154440 [Beta vulgaris subsp. vulgaris]	NA	NA	NA	NA	5.34	5.41	4.46	4.97	4.88	5.15	6.5	6.24	5.9	7.13	6.78	7.25	11.97	10.07	12.88	5.97882e-22	1.76105e-21
Bv5_101940_xwqe	blue	586.876	PREDICTED: uncharacterized protein LOC104892424 [Beta vulgaris subsp. vulgaris]	GO:0003674(molecular_function);GO:0008150(biological_process)	NA	NA	NA	1.29	1.07	1.05	2.61	2.51	2.32	3.55	3.84	3.46	7.94	7.06	7.97	15.52	13.11	15.46	1.30296e-152	2.98288e-151
Bv2_038670_ihau	blue	585.516	hypothetical protein BVRB_2g038670 [Beta vulgaris subsp. vulgaris]	GO:0005737(cytoplasm);GO:0008146(sulfotransferase activity);GO:0009507(chloroplast);GO:0009694(jasmonic acid metabolic process);GO:0009753(response to jasmonic acid);GO:0080131(hydroxyjasmonate sulfotransferase activity)	NA	NA	NA	2.63	2.77	2.92	0.4	0.49	0.49	13.12	13.14	12.82	12.4	12.03	10.28	23.68	22.3	22.83	0	0
Bv3_052220_fjja	blue	585.098	PREDICTED: bark storage protein A [Beta vulgaris subsp. vulgaris]	NA	NA	NA	NA	7.2	8.08	7.88	6.43	6.13	6.88	12.29	11.95	11.44	53.55	51.96	51.23	144.53	123.24	140.23	0	0
Bv4_093200_hwsr	blue	584.728	PREDICTED: beta-glucuronosyltransferase GlcAT14A [Beta vulgaris subsp. vulgaris]	GO:0005794(Golgi apparatus);GO:0008375(acetylglucosaminyltransferase activity);GO:0009567(double fertilization forming a zygote and endosperm);GO:0016020(membrane);GO:0016051(carbohydrate biosynthetic process);GO:0016757(transferase activity, transferring glycosyl groups);GO:0048868(pollen tube development);GO:0048868(pollen tube development)	NA	NA	NA	1.92	2.24	1.64	4.42	4.83	3.8	7.18	8.01	7.52	6.6	7.19	6.98	13.46	12.76	14.05	1.84253e-85	1.9782e-84
Bv_013350_mahg	blue	584.699	PREDICTED: floral homeotic protein APETALA 2 [Beta vulgaris subsp. vulgaris]	GO:0003677(DNA binding);GO:0003700(DNA binding transcription factor activity);GO:0005634(nucleus);GO:0006351(transcription, DNA-templated);GO:0006355(regulation of transcription, DNA-templated);GO:0009908(flower development);GO:0010073(meristem maintenance);GO:0010093(specification of floral organ identity);GO:0019953(sexual reproduction);GO:0030154(cell differentiation);GO:0048316(seed developme…	NA	NA	NA	20.3	24.43	22.72	16.09	13.92	16.23	27.4	26.51	28.12	24.19	23.65	22.79	60.79	56.98	59.47	1.15124e-135	2.25657e-134
Bv8_183250_dqur	blue	584.503	PREDICTED: E3 ubiquitin-protein ligase RMA1H1 [Beta vulgaris subsp. vulgaris]	GO:0004842(ubiquitin-protein transferase activity);GO:0005515(protein binding);GO:0005789(endoplasmic reticulum membrane);GO:0006970(response to osmotic stress);GO:0009409(response to cold);GO:0009414(response to water deprivation);GO:0009611(response to wounding);GO:0009723(response to ethylene);GO:0016567(protein ubiquitination);GO:0043161(proteasome-mediated ubiquitin-dependent protein catabol…	04141(Protein processing in endoplasmic reticulum)	K10666	EC:2.3.2.27	29.12	30.6	30.21	23.93	26.22	25.56	45.66	43.59	46.06	46.73	43.18	45.1	68.62	58.04	68.02	6.27574e-65	4.89492e-64
Bv7_173410_cfin	blue	583.618	PREDICTED: uncharacterized protein LOC104900068 isoform X1 [Beta vulgaris subsp. vulgaris];hypothetical protein BVRB_7g173410 isoform B [Beta vulgaris subsp. vulgaris]	GO:0005794(Golgi apparatus);GO:0008150(biological_process);GO:0016021(integral component of membrane);GO:0016787(hydrolase activity);GO:0016787(hydrolase activity)	NA	NA	NA	2.36	2.34	2.52	3.37	2.7	3	3.77	4.62	3.38	3.39	3.73	4.24	8.6	8.19	8.27	5.09776e-17	1.2421e-16
Bv2_029680_jmxw	blue	583.477	PREDICTED: probable sodium-coupled neutral amino acid transporter 6 [Beta vulgaris subsp. vulgaris]	GO:0003333(amino acid transmembrane transport);GO:0015171(amino acid transmembrane transporter activity)	NA	NA	NA	2.8	3.11	3.29	3.23	4.56	4.12	4.77	4.86	3.91	5.61	6.18	6.45	15.41	16.82	16.49	9.34264e-113	1.44178e-111
Bv9_218320_jkgn	blue	583.223	PREDICTED: transmembrane protein 45A [Beta vulgaris subsp. vulgaris]	GO:0003674(molecular_function);GO:0008150(biological_process);GO:0016021(integral component of membrane)	NA	NA	NA	4.66	3.23	3.86	8.2	6.31	7.71	11.78	13.74	10.61	13.14	12.31	11.98	24.98	23.48	21.53	5.74712e-41	2.84886e-40
Bv5_102350_mimc	blue	582.088	PREDICTED: long-chain-alcohol oxidase FAO4A [Beta vulgaris subsp. vulgaris]	GO:0046577(long-chain-alcohol oxidase activity)	NA	NA	NA	15.61	17.29	18.06	13.29	11.18	12.23	16.26	16.65	19.78	23.55	25.26	25.61	63.79	69.12	72.2	9.45527e-111	1.41428e-109
Bv1_006040_uihe	blue	581.84	PREDICTED: protein O-glucosyltransferase 1 isoform X1 [Beta vulgaris subsp. vulgaris]	GO:0006664(glycolipid metabolic process);GO:0012505(endomembrane system);GO:0046527(glucosyltransferase activity)	00514(Other types of O-glycan biosynthesis)	K13667	EC:2.4.1.-	10.92	13.72	13.92	10.82	11.51	11.55	18.09	19.2	18.37	15.44	17.26	16.64	27.38	28.45	32.08	2.67001e-28	9.58391e-28
Bv1_012380_snce	blue	581.788	PREDICTED: uncharacterized protein LOC104896390 isoform X1 [Beta vulgaris subsp. vulgaris];PREDICTED: uncharacterized protein LOC104896390 isoform X2 [Beta vulgaris subsp. vulgaris];hypothetical protein BVRB_1g012380 isoform C [Beta vulgaris subsp. vulgaris]	GO:0003674(molecular_function);GO:0005576(extracellular region);GO:0005739(mitochondrion);GO:0005773(vacuole);GO:0008150(biological_process);GO:0016021(integral component of membrane);GO:0016021(integral component of membrane)	04144(Endocytosis);04145(Phagosome);04145(Phagosome)	K07897	NA	9.9	10.2	10.41	8.98	8.88	8.98	11.92	10.99	12.61	16.88	15.65	17.16	25.18	25.54	24.12	4.24183e-56	2.8259e-55
Bv8_195160_ahoy	blue	580.588	PREDICTED: B3 domain-containing protein Os01g0234100 isoform X2 [Beta vulgaris subsp. vulgaris];hypothetical protein BVRB_8g195160 isoform B [Beta vulgaris subsp. vulgaris];PREDICTED: B3 domain-containing protein Os01g0234100 isoform X1 [Beta vulgaris subsp. vulgaris]	GO:0003677(DNA binding);GO:0005634(nucleus);GO:0006351(transcription, DNA-templated);GO:0006355(regulation of transcription, DNA-templated);GO:0006355(regulation of transcription, DNA-templated)	NA	NA	NA	15.44	16.08	18.22	20.47	17.45	17.32	19.67	21.82	18.03	25.28	25.51	20.7	53.94	54.54	56.31	3.62482e-58	2.51543e-57
Bv_009630_xgdu	blue	580.554	PREDICTED: transmembrane ascorbate ferrireductase 1 [Beta vulgaris subsp. vulgaris]	GO:0016491(oxidoreductase activity);GO:0055114(oxidation-reduction process)	NA	NA	NA	25.59	25.45	27.92	31.27	32.58	32.11	33.43	33.78	33.64	36.02	35.5	35	72.06	66.61	66.42	1.56194e-76	1.48471e-75
Bv1_004800_nafi	blue	580.544	PREDICTED: UPF0187 protein At3g61320, chloroplastic [Beta vulgaris subsp. vulgaris]	GO:0005247(voltage-gated chloride channel activity);GO:0009507(chloroplast);GO:0009533(chloroplast stromal thylakoid);GO:0010027(thylakoid membrane organization);GO:0016021(integral component of membrane);GO:0019684(photosynthesis, light reaction);GO:0031969(chloroplast membrane);GO:0042548(regulation of photosynthesis, light reaction);GO:0042651(thylakoid membrane)	NA	NA	NA	5	5.42	5.59	4.51	5.48	5.39	11.71	11.19	12.95	10.46	10.67	10.77	17.71	16.94	18.29	4.11173e-95	5.02285e-94
Bv9_224340_fpui	blue	579.907	PREDICTED: filament-like plant protein 7 isoform X1 [Beta vulgaris subsp. vulgaris]	GO:0005737(cytoplasm);GO:0005886(plasma membrane)	NA	NA	NA	76.96	87.23	75.35	154.54	161.62	155.49	214.78	210.84	191.51	393.41	398.62	390.08	719.33	674.68	676.7	4.89786e-242	2.19781e-240
Bv6_132070_dsit	blue	578.736	PREDICTED: ribonucleoside-diphosphate reductase small chain [Beta vulgaris subsp. vulgaris]	GO:0004748(ribonucleoside-diphosphate reductase activity, thioredoxin disulfide as acceptor);GO:0005971(ribonucleoside-diphosphate reductase complex);GO:0009263(deoxyribonucleotide biosynthetic process)	00230(Purine metabolism);00240(Pyrimidine metabolism);00480(Glutathione metabolism)	K10808	EC:1.17.4.1	19.96	24.63	22.91	17.68	19.56	16.85	26.39	24.89	23.79	31.1	36.18	33.6	50.77	56.21	58.26	2.62546e-69	2.20656e-68
Bv7_177520_zymp	blue	576.657	PREDICTED: uncharacterized protein LOC104908644 [Beta vulgaris subsp. vulgaris]	NA	NA	NA	NA	0	0	0	0	0.2	0.34	0.47	0.4	0	2.53	2.38	2.4	8.25	6.56	8.31	4.89073e-33	1.98969e-32
Bv7_174540_ksge	blue	576.211	PREDICTED: transcription factor MYB59 isoform X1 [Beta vulgaris subsp. vulgaris];PREDICTED: transcription factor MYB59 isoform X2 [Beta vulgaris subsp. vulgaris]	GO:0000981(RNA polymerase II transcription factor activity, sequence-specific DNA binding);GO:0001135(transcription factor activity, RNA polymerase II transcription factor recruiting);GO:0003677(DNA binding);GO:0003700(DNA binding transcription factor activity);GO:0005634(nucleus);GO:0006351(transcription, DNA-templated);GO:0006355(regulation of transcription, DNA-templated);GO:0006357(regulation…	NA	NA	NA	49.59	51.53	49.69	25.94	23.64	17.93	85.31	84.91	78.56	58.8	51.55	55.85	199.44	183.89	196.52	4.06488e-175	1.12876e-173
Bv_018160_stns	blue	576.122	hypothetical protein BVRB_4g096220 [Beta vulgaris subsp. vulgaris]	NA	NA	NA	NA	0.49	0.19	0.17	0.19	1.09	0.66	2.53	2.08	2.24	4.01	4.43	4.98	7.63	7.58	9.06	1.10464e-41	5.57559e-41
Bv_015880_gjus	blue	575.992	PREDICTED: uncharacterized protein LOC104885324 [Beta vulgaris subsp. vulgaris]	NA	NA	NA	NA	3.55	5.58	4.21	4.25	3.38	3.5	6.92	7.4	6.19	6.52	5.71	5.78	24.06	21.75	20.26	2.28608e-74	2.10521e-73
Bv1_020040_taaj	blue	575.476	PREDICTED: SPX domain-containing membrane protein At4g22990 [Beta vulgaris subsp. vulgaris]	GO:0006817(phosphate ion transport);GO:0009705(plant-type vacuole membrane);GO:0016021(integral component of membrane);GO:0055085(transmembrane transport);GO:1905011(transmembrane phosphate ion transport from cytosol to vacuole)	NA	NA	NA	1.74	2.16	2.41	2.82	2.49	2.11	10.18	9.49	10.09	7.92	6.63	7.46	17.91	14.65	17.84	1.17539e-138	2.38443e-137
Bv6_150120_qeiz	blue	575.35	PREDICTED: glycerophosphodiester phosphodiesterase GDPD1, chloroplastic isoform X1 [Beta vulgaris subsp. vulgaris]	GO:0008889(glycerophosphodiester phosphodiesterase activity);GO:0030643(cellular phosphate ion homeostasis);GO:0046475(glycerophospholipid catabolic process)	00564(Glycerophospholipid metabolism)	K18696	EC:3.1.4.46	23.07	28.99	26.7	9.97	8.79	10.23	20.65	23.95	16.98	41.37	37.1	35.82	102.35	96.72	102.6	4.66296e-206	1.59819e-204
Bv8_186000_dpty	blue	575.336	PREDICTED: 5'-adenylylsulfate reductase 1, chloroplastic [Beta vulgaris subsp. vulgaris]	GO:0000103(sulfate assimilation);GO:0004604(phosphoadenylyl-sulfate reductase (thioredoxin) activity);GO:0005737(cytoplasm);GO:0009507(chloroplast);GO:0009534(chloroplast thylakoid);GO:0009536(plastid);GO:0009570(chloroplast stroma);GO:0009973(adenylyl-sulfate reductase activity);GO:0019344(cysteine biosynthetic process);GO:0019419(sulfate reduction);GO:0033741(adenylyl-sulfate reductase (glutath…	00920(Sulfur metabolism)	K05907	EC:1.8.4.9	20.73	25.97	26.65	235.01	242.37	235.61	351.33	349.07	346.77	375.08	374.36	391.01	814.32	763.27	824.79	1.10912e-162	2.79517e-161
Bv9_212490_nhip	blue	574.76	PREDICTED: Niemann-Pick C1 protein [Beta vulgaris subsp. vulgaris]	GO:0005886(plasma membrane);GO:0008158(hedgehog receptor activity);GO:0009506(plasmodesma);GO:0009555(pollen development);GO:0016020(membrane);GO:0090153(regulation of sphingolipid biosynthetic process)	NA	NA	NA	54.82	58.99	59.48	67.59	66.7	68.49	112.44	109.55	108.07	138.95	138.84	128.2	195.75	169.53	181.94	3.88555e-125	6.77486e-124
Bv4_080570_cfgt	blue	574.729	PREDICTED: nicotianamine synthase [Beta vulgaris subsp. vulgaris]	GO:0005634(nucleus);GO:0009555(pollen development);GO:0009860(pollen tube growth);GO:0010233(phloem transport);GO:0030410(nicotianamine synthase activity);GO:0030418(nicotianamine biosynthetic process)	NA	NA	NA	2.4	2.26	3.1	12.98	13.39	13.76	11.93	11.52	10.98	24.12	22.65	19.59	77.5	74.84	80.51	0	0
Bv6_130040_gkpy	blue	573.852	PREDICTED: 1-aminocyclopropane-1-carboxylate oxidase homolog 1 [Beta vulgaris subsp. vulgaris]	GO:0051213(dioxygenase activity)	00940(Phenylpropanoid biosynthesis)	K06892	EC:1.14.11.-	2.04	2.34	1.99	1.69	2	1.85	2.13	3.06	2.06	3.05	3.41	3.69	9.78	10.16	9.2	3.2152e-41	1.60395e-40
Bv8_183020_yiko	blue	572.731	PREDICTED: protein SMG7L [Beta vulgaris subsp. vulgaris]	GO:0005634(nucleus);GO:0007004(telomere maintenance via telomerase);GO:0008150(biological_process);GO:0042162(telomeric DNA binding)	03015(mRNA surveillance pathway)	K14409	NA	17.55	19.79	18.23	5.31	6.69	5.22	26.75	27.36	29.98	27.23	26.12	28.03	56.72	49.65	53.32	3.55734e-162	8.91516e-161
Bv9_225210_idxi	blue	572.613	PREDICTED: F-box/kelch-repeat protein At3g23880 isoform X1 [Beta vulgaris subsp. vulgaris]	GO:0004842(ubiquitin-protein transferase activity);GO:0019005(SCF ubiquitin ligase complex);GO:0031146(SCF-dependent proteasomal ubiquitin-dependent protein catabolic process);GO:0031146(SCF-dependent proteasomal ubiquitin-dependent protein catabolic process)	04141(Protein processing in endoplasmic reticulum);04626(Plant-pathogen interaction);04626(Plant-pathogen interaction)	K04079	NA	26.28	28.17	26.6	24.56	28.67	25.77	38.06	38.45	37.08	45.15	43.22	35.82	55.25	58.19	66.81	8.74688e-25	2.81358e-24
Bv8_196180_ganc	blue	571.644	PREDICTED: uncharacterized protein LOC104902184 [Beta vulgaris subsp. vulgaris]	GO:0003674(molecular_function);GO:0005634(nucleus);GO:0008150(biological_process);GO:0016021(integral component of membrane)	NA	NA	NA	9.39	12.42	8.65	12.97	9.38	9.48	20.41	18.35	20.68	20.88	21.83	18.92	32.05	34.76	42.09	4.15149e-40	2.02499e-39
Bv6_140970_nxmq	blue	570.269	PREDICTED: phosphate transporter PHO1 homolog 1 isoform X1 [Beta vulgaris subsp. vulgaris]	GO:0005802(trans-Golgi network);GO:0005886(plasma membrane)	04016(MAPK signaling pathway - plant);04075(Plant hormone signal transduction)	K14514	NA	0.48	0.3	0.41	0.29	0.33	0.45	1.21	1.52	0.97	1.42	1.11	1.08	2.22	2.08	2.3	7.7984e-28	2.7493e-27
Bv2_027040_efwp	blue	570.235	PREDICTED: delta(7)-sterol-C5(6)-desaturase [Beta vulgaris subsp. vulgaris]	GO:0000248(C-5 sterol desaturase activity);GO:0005506(iron ion binding);GO:0005789(endoplasmic reticulum membrane);GO:0016020(membrane);GO:0016021(integral component of membrane);GO:0016126(sterol biosynthetic process);GO:0016491(oxidoreductase activity);GO:0055114(oxidation-reduction process)	00100(Steroid biosynthesis)	K00227	EC:1.14.19.20	1.05	1.36	1.61	1.45	1.7	1.23	2.92	2.96	3.01	3.13	3.42	2.67	4.67	4.7	4.54	4.46279e-36	1.95148e-35
Bv2_043170_jjtq	blue	568.727	hypothetical protein BVRB_2g043170 [Beta vulgaris subsp. vulgaris]	GO:0005515(protein binding);GO:0005524(ATP binding);GO:0005576(extracellular region);GO:0006952(defense response);GO:0043531(ADP binding)	NA	NA	NA	12.15	14.36	14.23	7.12	6.92	5.67	16.33	18.04	15.84	14.33	14.87	14.04	35.34	31.38	34.51	7.34094e-119	1.20303e-117
Bv4_078230_yrfa	blue	568.659	PREDICTED: uncharacterized protein DDB_G0271670 [Beta vulgaris subsp. vulgaris]	GO:0003674(molecular_function);GO:0005739(mitochondrion);GO:0008150(biological_process)	NA	NA	NA	6.62	7.91	7.24	7.71	8.74	8.31	12.68	12.01	12.56	9.29	10.62	9.42	22.89	19.96	23.72	5.65021e-44	2.9824e-43
Bv1_003210_psht	blue	568.337	PREDICTED: long chain acyl-CoA synthetase 4 [Beta vulgaris subsp. vulgaris]	GO:0004467(long-chain fatty acid-CoA ligase activity);GO:0005524(ATP binding);GO:0005634(nucleus);GO:0005794(Golgi apparatus);GO:0005829(cytosol);GO:0005886(plasma membrane);GO:0006631(fatty acid metabolic process);GO:0006633(fatty acid biosynthetic process);GO:0102391(decanoate-CoA ligase activity)	00061(Fatty acid biosynthesis);00071(Fatty acid degradation);04146(Peroxisome)	K01897	EC:6.2.1.3	0.89	0.84	1.05	0.98	1.56	1.19	1.3	1.55	1.9	2.33	1.79	1.66	3.73	3.77	4	2.37712e-17	5.86668e-17
Bv6_133210_uykq	blue	567.532	PREDICTED: RING-H2 finger protein ATL78 [Beta vulgaris subsp. vulgaris]	GO:0008270(zinc ion binding);GO:0016021(integral component of membrane);GO:0016567(protein ubiquitination);GO:0046872(metal ion binding)	NA	NA	NA	14.31	15.66	16.56	5.24	4.85	4.22	25.85	26.43	23.66	24.88	26.2	23.71	48.82	43.06	45.16	2.12866e-220	7.96321e-219
Bv6_153060_mqdn	blue	566.79	PREDICTED: ATP-dependent 6-phosphofructokinase 2 [Beta vulgaris subsp. vulgaris]	GO:0003872(6-phosphofructokinase activity);GO:0005524(ATP binding);GO:0005737(cytoplasm);GO:0005829(cytosol);GO:0005945(6-phosphofructokinase complex);GO:0006002(fructose 6-phosphate metabolic process);GO:0006096(glycolytic process);GO:0046872(metal ion binding)	00010(Glycolysis / Gluconeogenesis);00030(Pentose phosphate pathway);00051(Fructose and mannose metabolism);00052(Galactose metabolism);03018(RNA degradation)	K00850	EC:2.7.1.11	0	0.04	0	0	0.04	0	0.12	0.04	0.09	0.62	0.71	0.46	3.87	3.16	4.19	1.35909e-80	1.36776e-79
Bv6_127750_mknh	blue	565.911	PREDICTED: translocator protein homolog [Beta vulgaris subsp. vulgaris]	GO:0000139(Golgi membrane);GO:0005739(mitochondrion);GO:0005783(endoplasmic reticulum);GO:0005789(endoplasmic reticulum membrane);GO:0005794(Golgi apparatus);GO:0005795(Golgi stack);GO:0006778(porphyrin-containing compound metabolic process);GO:0006970(response to osmotic stress);GO:0009651(response to salt stress);GO:0009737(response to abscisic acid);GO:0016020(membrane);GO:0016021(integral com…	NA	NA	NA	0.08	0	0.02	0.4	0.72	0.31	4.13	4	3.67	24.01	24.49	25.67	55.15	50.39	56.93	0	0
Bv6_131710_mndk	blue	565.876	PREDICTED: protein NRT1/ PTR FAMILY 8.3 [Beta vulgaris subsp. vulgaris]	GO:0000325(plant-type vacuole);GO:0005215(transporter activity);GO:0005773(vacuole);GO:0005774(vacuolar membrane);GO:0005794(Golgi apparatus);GO:0005886(plasma membrane);GO:0009705(plant-type vacuole membrane);GO:0015031(protein transport);GO:0015112(nitrate transmembrane transporter activity);GO:0015334(high-affinity oligopeptide transmembrane transporter activity);GO:0015833(peptide transport);…	NA	NA	NA	1.24	1.41	0.93	0.97	1.15	0.88	1.63	1.68	1.48	1.37	1.49	1.63	6.91	5.86	6.54	1.00599e-71	8.80861e-71
Bv2_030370_nmyr	blue	565.715	PREDICTED: ethylene-responsive transcription factor WIN1 [Beta vulgaris subsp. vulgaris]	GO:0003677(DNA binding);GO:0003700(DNA binding transcription factor activity);GO:0005634(nucleus);GO:0006351(transcription, DNA-templated);GO:0006355(regulation of transcription, DNA-templated);GO:0009873(ethylene-activated signaling pathway)	NA	NA	NA	5.62	4.36	4.33	2.83	2.38	2.29	9.49	9.8	6.04	7	8.07	5.52	19.08	17.71	17.12	4.57586e-49	2.68552e-48
Bv8_198660_ngds	blue	565.421	PREDICTED: probable cysteine protease RD19D [Beta vulgaris subsp. vulgaris]	GO:0004197(cysteine-type endopeptidase activity);GO:0005615(extracellular space);GO:0005764(lysosome);GO:0051603(proteolysis involved in cellular protein catabolic process)	NA	NA	NA	0	0	0	0	0	0.18	0.4	0.82	0.61	0.22	0.53	0.95	2.4	1.98	2.67	2.27206e-14	4.90386e-14
Bv4_071790_jfup	blue	565.336	PREDICTED: G-type lectin S-receptor-like serine/threonine-protein kinase LECRK3 [Beta vulgaris subsp. vulgaris]	GO:0004674(protein serine/threonine kinase activity);GO:0005886(plasma membrane);GO:0006468(protein phosphorylation)	NA	NA	NA	3.88	4.71	4.31	1.53	1.35	1.09	13.47	11.72	12.14	5.34	5.94	4.89	40.44	35.66	39.01	0	0
Bv_008150_pfms	blue	565.197	PREDICTED: basic 7S globulin [Beta vulgaris subsp. vulgaris]	GO:0004190(aspartic-type endopeptidase activity);GO:0006508(proteolysis);GO:0030163(protein catabolic process)	NA	NA	NA	86.02	92.25	98.32	88.05	87.62	90.08	69.92	68.87	69.38	69.99	69.22	67.79	45.37	40.85	47.64	8.30142e-39	3.91446e-38
Bv6_156050_nizj	blue	564.958	PREDICTED: uncharacterized protein LOC104908468 [Beta vulgaris subsp. vulgaris]	GO:0000166(nucleotide binding);GO:0005737(cytoplasm);GO:0005834(heterotrimeric G-protein complex);GO:0008150(biological_process)	00565(Ether lipid metabolism)	K16794	NA	2.08	2.83	5.36	0.98	0.74	1.44	7.57	7.6	7.89	5.61	5.55	6.38	16.53	14.02	15.05	8.8924e-35	3.77738e-34
Bv7_167070_hkox	blue	564.654	PREDICTED: protein SULFUR DEFICIENCY-INDUCED 1 [Beta vulgaris subsp. vulgaris]	GO:0005515(protein binding);GO:0005634(nucleus);GO:0006792(regulation of sulfur utilization);GO:0010438(cellular response to sulfur starvation);GO:0010439(regulation of glucosinolate biosynthetic process);GO:0090568(nuclear transcriptional repressor complex)	NA	NA	NA	0.59	0.77	0.6	8.13	6.16	5.13	13.59	12.85	9.2	17.68	17.84	16.14	165.7	161.9	165.48	0	0
Bv5_107560_mkim	blue	564.281	hypothetical protein BVRB_5g107560 isoform B [Beta vulgaris subsp. vulgaris];PREDICTED: mechanosensitive ion channel protein 10-like [Beta vulgaris subsp. vulgaris]	GO:0005886(plasma membrane);GO:0006820(anion transport);GO:0008381(mechanosensitive ion channel activity);GO:0050982(detection of mechanical stimulus);GO:0050982(detection of mechanical stimulus)	NA	NA	NA	19.55	16.4	17.97	23.12	19.83	20.12	26.99	32.33	25.39	35.31	37.72	32.1	52.82	46.24	49.17	2.20958e-38	1.0287e-37
Bv8_192800_rntx	blue	564.146	PREDICTED: putative glycerol-3-phosphate transporter 5 [Beta vulgaris subsp. vulgaris]	GO:0006820(anion transport);GO:0016021(integral component of membrane);GO:0022857(transmembrane transporter activity);GO:0055085(transmembrane transport)	NA	NA	NA	6.84	8.04	9.82	9.03	9.64	9.51	12.69	11.94	14.55	12.04	13.79	13.91	19.75	20.85	23.22	1.45769e-21	4.22787e-21
Bv5_117700_rmhe	blue	564.081	PREDICTED: uncharacterized protein LOC104894322 [Beta vulgaris subsp. vulgaris];hypothetical protein BVRB_5g117700 isoform B [Beta vulgaris subsp. vulgaris]	GO:0003676(nucleic acid binding);GO:0005622(intracellular);GO:0005634(nucleus);GO:0005634(nucleus)	NA	NA	NA	3.63	3.87	3.45	3.06	4.59	3.46	4.25	4.99	4.82	6.04	5.46	4.94	8.4	8.03	9.46	1.64169e-16	3.91473e-16
Bv4_074040_wikw	blue	563.816	PREDICTED: blue copper protein [Beta vulgaris subsp. vulgaris]	GO:0046658(anchored component of plasma membrane)	NA	NA	NA	2.03	2.89	2	1.84	1.68	2.01	4.87	5.28	5.13	7.52	7.42	6.31	12.89	10.25	10.14	7.65033e-72	6.71513e-71
Bv6_140860_gyqz	blue	563.579	PREDICTED: uncharacterized protein LOC104896325 [Beta vulgaris subsp. vulgaris]	GO:0016021(integral component of membrane)	NA	NA	NA	0.29	0.55	0.36	0.23	0.29	0.49	1.32	1.13	0.78	1.03	1.78	1.6	2.65	2.87	3.38	1.86751e-31	7.30045e-31
Bv3_050770_urjj	blue	563.158	PREDICTED: uncharacterized calcium-binding protein At1g02270 isoform X2 [Beta vulgaris subsp. vulgaris];PREDICTED: uncharacterized calcium-binding protein At1g02270 isoform X1 [Beta vulgaris subsp. vulgaris]	GO:0004519(endonuclease activity);GO:0004527(exonuclease activity);GO:0005509(calcium ion binding);GO:0005509(calcium ion binding)	NA	NA	NA	8.17	7.77	8.74	5.45	5.9	5.86	10.97	11.74	10.96	10.14	9.33	11.4	16.76	17.31	17.52	3.40995e-46	1.87526e-45
Bv6_154410_afou	blue	563.151	hypothetical protein BVRB_6g154410 [Beta vulgaris subsp. vulgaris]	NA	NA	NA	NA	0	0	0.09	0	0.08	0	0.16	0.21	0.27	0.94	0.73	1.33	9.15	8.01	9.47	1.71317e-102	2.3178e-101
Bv2_025830_fmps	blue	563.075	PREDICTED: 17.4 kDa class I heat shock protein [Beta vulgaris subsp. vulgaris]	GO:0005515(protein binding);GO:0005737(cytoplasm);GO:0009408(response to heat)	04141(Protein processing in endoplasmic reticulum)	K13993	NA	0	0	0	0.15	0	0	4.25	1.91	3.69	6.31	7.78	10.76	16.24	16.3	18	2.55547e-106	3.61503e-105
Bv1_006080_pync	blue	563.069	PREDICTED: O-glucosyltransferase rumi homolog [Beta vulgaris subsp. vulgaris]	GO:0006664(glycolipid metabolic process);GO:0012505(endomembrane system);GO:0046527(glucosyltransferase activity)	00514(Other types of O-glycan biosynthesis)	K13667	EC:2.4.1.-	4.86	5.11	5	5.95	6.15	4.36	7.04	6.21	6.29	7.41	6.93	6.94	9.92	9.66	10.47	2.58892e-10	4.6069e-10
Bv1_017720_jmcm	blue	562.678	PREDICTED: serine/threonine-protein kinase D6PKL1 [Beta vulgaris subsp. vulgaris]	GO:0004674(protein serine/threonine kinase activity);GO:0005634(nucleus);GO:0005737(cytoplasm);GO:0005886(plasma membrane);GO:0035556(intracellular signal transduction)	NA	NA	NA	13.52	15.98	15.91	13.19	13.39	13.59	16.71	15.72	16.28	16.08	17.5	16.19	49.8	48.27	49.43	1.49304e-168	3.94505e-167
Bv3_057080_hwpx	blue	562.673	PREDICTED: receptor-like protein 12 [Beta vulgaris subsp. vulgaris]	GO:0004674(protein serine/threonine kinase activity);GO:0005886(plasma membrane);GO:0006468(protein phosphorylation)	NA	NA	NA	9.95	11.47	10.96	6.53	6.54	6.67	15.75	15.57	16.02	18.8	18.08	17.51	26.45	25.15	25.89	1.90485e-134	3.69353e-133
Bv1_007210_xqgo	blue	562.558	hypothetical protein BVRB_1g007210 isoform A [Beta vulgaris subsp. vulgaris];hypothetical protein BVRB_1g007210 isoform B [Beta vulgaris subsp. vulgaris]	GO:0001054(RNA polymerase I activity);GO:0005736(DNA-directed RNA polymerase I complex);GO:0005736(DNA-directed RNA polymerase I complex)	00230(Purine metabolism);00240(Pyrimidine metabolism);03020(RNA polymerase);03020(RNA polymerase)	K02999	EC:2.7.7.6	5.86	6.66	5.74	3.78	2.68	3.55	6.54	7.46	7.5	6.55	6.95	6.46	13.9	13.06	13.44	1.58616e-45	8.5942e-45
Bv6_130540_zmud	blue	562.406	PREDICTED: cold shock domain-containing protein 3 [Beta vulgaris subsp. vulgaris]	GO:0003676(nucleic acid binding);GO:0003677(DNA binding);GO:0003729(mRNA binding);GO:0005515(protein binding);GO:0005634(nucleus);GO:0005737(cytoplasm);GO:0006355(regulation of transcription, DNA-templated);GO:0008270(zinc ion binding);GO:0009409(response to cold);GO:0009631(cold acclimation);GO:0009826(unidimensional cell growth);GO:0032508(DNA duplex unwinding)	NA	NA	NA	4.92	4.96	5.03	5.65	5.5	4.5	6.76	6.84	7.57	8.46	8.53	7.23	11.18	10.28	10.5	1.95509e-14	4.23599e-14
Bv8_191410_ghpq	blue	562.317	PREDICTED: heat shock 70 kDa protein-like [Beta vulgaris subsp. vulgaris]	GO:0005524(ATP binding);GO:0005618(cell wall);GO:0005737(cytoplasm);GO:0005829(cytosol);GO:0005886(plasma membrane);GO:0006457(protein folding);GO:0009408(response to heat);GO:0009507(chloroplast);GO:0009615(response to virus);GO:0016020(membrane);GO:0016887(ATPase activity)	03040(Spliceosome);04141(Protein processing in endoplasmic reticulum);04144(Endocytosis)	K03283	NA	0	0	0.31	0	0	0	0	0	0.08	1.06	1.02	0.95	5.8	6.06	5.76	8.44487e-32	3.33093e-31
Bv3_067580_ukqh	blue	562.036	PREDICTED: uncharacterized protein LOC104906597 [Beta vulgaris subsp. vulgaris]	GO:0005739(mitochondrion);GO:0008150(biological_process)	00562(Inositol phosphate metabolism);04070(Phosphatidylinositol signaling system)	K18081	EC:3.1.3.64;EC:3.1.3.95	2.12	2.27	2.33	2.47	2.45	2.11	4.42	4.2	4.77	3.95	5.4	4.87	7.6	6.52	7.1	3.33168e-28	1.19328e-27
Bv7_173340_rrrf	blue	562.034	PREDICTED: L-type lectin-domain containing receptor kinase IV.1-like [Beta vulgaris subsp. vulgaris]	GO:0004674(protein serine/threonine kinase activity);GO:0005524(ATP binding);GO:0005886(plasma membrane);GO:0006468(protein phosphorylation);GO:0009751(response to salicylic acid);GO:0016021(integral component of membrane);GO:0016301(kinase activity);GO:0030246(carbohydrate binding)	NA	NA	NA	4.67	5.35	7.03	1.99	2.21	1.96	13.35	11.26	12.44	9.29	9.72	9.17	23.23	21.52	20.75	3.55505e-101	4.71752e-100
Bv1_018770_zsda	blue	561.803	PREDICTED: chalcone synthase [Beta vulgaris subsp. vulgaris]	GO:0005515(protein binding);GO:0005634(nucleus);GO:0005737(cytoplasm);GO:0005783(endoplasmic reticulum);GO:0006979(response to oxidative stress);GO:0009611(response to wounding);GO:0009629(response to gravity);GO:0009705(plant-type vacuole membrane);GO:0009715(chalcone biosynthetic process);GO:0009733(response to auxin);GO:0009753(response to jasmonic acid);GO:0009813(flavonoid biosynthetic proce…	00941(Flavonoid biosynthesis);04712(Circadian rhythm - plant)	K00660	EC:2.3.1.74	0.08	0.02	0.06	0.05	0.03	0.02	0.03	0.05	0.04	0.29	0.33	0.27	1.16	1.22	1.39	2.82592e-57	1.92831e-56
Bv4_091930_uffm	blue	561.697	PREDICTED: 2S seed storage protein [Beta vulgaris subsp. vulgaris]	NA	NA	NA	NA	0.07	0	0	0.22	0	0	0.72	0.1	0.27	24.01	23.2	22.77	70.69	77.24	85.64	0	0
Bv5_106110_proq	blue	561.591	PREDICTED: uncharacterized protein LOC104892927 [Beta vulgaris subsp. vulgaris]	GO:0003674(molecular_function);GO:0008150(biological_process)	NA	NA	NA	14.15	13.36	14.02	15.44	16.08	14.48	12.2	12.15	10.07	10.05	12.27	11.21	5.84	5.27	5.28	5.00586e-29	1.82932e-28
Bv7_175870_kntw	blue	561.521	PREDICTED: peroxidase 57 [Beta vulgaris subsp. vulgaris]	GO:0004601(peroxidase activity);GO:0009505(plant-type cell wall);GO:0009664(plant-type cell wall organization)	00940(Phenylpropanoid biosynthesis)	K00430	EC:1.11.1.7	1.61	1.8	1.13	5.36	4.97	4.22	10.04	10.25	9.28	9.6	10.75	9.59	102.87	100.96	106.83	0	0
Bv5_100450_ygei	blue	561.328	PREDICTED: glutathione S-transferase T1 isoform X1 [Beta vulgaris subsp. vulgaris]	GO:0004364(glutathione transferase activity);GO:0005737(cytoplasm);GO:0006749(glutathione metabolic process)	00480(Glutathione metabolism)	K00799	EC:2.5.1.18	0	0	0.17	0.31	0.12	0.55	0	0.2	0.17	2.55	1.91	2.41	9.39	9.59	9.11	1.17051e-57	8.03288e-57
Bv8_196000_myhn	blue	561.309	PREDICTED: probable serine incorporator [Beta vulgaris subsp. vulgaris]	GO:0015194(L-serine transmembrane transporter activity);GO:0016021(integral component of membrane)	NA	NA	NA	25.79	24.95	23.79	21.81	18.67	20.74	30.19	27.95	26.26	39.33	31.7	35.6	56.91	47.35	54.2	3.86331e-32	1.53798e-31
Bv3_052210_acfp	blue	561.194	PREDICTED: bark storage protein A [Beta vulgaris subsp. vulgaris]	NA	NA	NA	NA	0.07	0	0	0.09	0.09	0.13	1.24	1.1	0.96	4.46	4.94	4.71	53.34	47.86	51.76	0	0
Bv6_128320_apzd	blue	561.035	PREDICTED: putative glycosyltransferase 7 [Beta vulgaris subsp. vulgaris]	GO:0000139(Golgi membrane);GO:0005768(endosome);GO:0005794(Golgi apparatus);GO:0005802(trans-Golgi network);GO:0008378(galactosyltransferase activity);GO:0009969(xyloglucan biosynthetic process);GO:0010192(mucilage biosynthetic process);GO:0010214(seed coat development);GO:0010392(galactoglucomannan metabolic process);GO:0016021(integral component of membrane);GO:0016740(transferase activity);GO:…	NA	NA	NA	0.63	0.52	0.61	1.77	1.37	1.72	3.54	2.64	2.91	4.15	4.51	3.44	6.7	5.88	7.38	2.9126e-69	2.4456e-68
Bv_009890_gpmg	blue	560.526	PREDICTED: berberine bridge enzyme-like 8 [Beta vulgaris subsp. vulgaris]	GO:0005576(extracellular region);GO:0009055(electron transfer activity);GO:0009507(chloroplast);GO:0016614(oxidoreductase activity, acting on CH-OH group of donors);GO:0050660(flavin adenine dinucleotide binding);GO:0055114(oxidation-reduction process)	00052(Galactose metabolism);00500(Starch and sucrose metabolism)	K01187	EC:3.2.1.20	2.61	3.2	2.71	1.85	2.54	2.43	2.67	3.44	2.37	3.8	3.32	4.49	8.37	8.03	8.94	2.24008e-32	8.95732e-32
Bv3_061350_fahh	blue	560.057	PREDICTED: nuclear transcription factor Y subunit A-9 isoform X2 [Beta vulgaris subsp. vulgaris];PREDICTED: nuclear transcription factor Y subunit A-4 isoform X1 [Beta vulgaris subsp. vulgaris]	GO:0003677(DNA binding);GO:0003700(DNA binding transcription factor activity);GO:0005515(protein binding);GO:0005634(nucleus);GO:0006351(transcription, DNA-templated);GO:0006355(regulation of transcription, DNA-templated);GO:0009555(pollen development);GO:0009793(embryo development ending in seed dormancy);GO:0010262(somatic embryogenesis);GO:0016602(CCAAT-binding factor complex);GO:0045892(negat…	NA	NA	NA	0.07	0.08	0.07	4.63	4.23	4.29	5.12	4.37	4	9.14	8.88	8.16	21.26	17.76	18.68	1e-306	1e-304
Bv3_062590_rysw	blue	559.796	PREDICTED: protein STRICTOSIDINE SYNTHASE-LIKE 10 [Beta vulgaris subsp. vulgaris]	GO:0005783(endoplasmic reticulum);GO:0016020(membrane);GO:0016788(hydrolase activity, acting on ester bonds)	NA	NA	NA	43.48	54.22	49.48	48.97	49.02	41.75	81.96	77.09	75.14	77.07	79.29	75.61	103.28	101.43	105.45	1.33812e-52	8.36047e-52
Bv3_059150_zokm	blue	559.61	PREDICTED: uncharacterized protein LOC104889058 [Beta vulgaris subsp. vulgaris]	GO:0003674(molecular_function);GO:0005576(extracellular region);GO:0005773(vacuole);GO:0005774(vacuolar membrane);GO:0008150(biological_process);GO:0009505(plant-type cell wall)	NA	NA	NA	131.35	148.8	136.36	125.12	133.51	139.86	413.86	417.58	422.69	435.68	459.82	449.31	647.89	617.42	715.13	9.40008e-69	7.80189e-68
Bv3_066640_fanw	blue	559.17	PREDICTED: uncharacterized protein LOC104906459 [Beta vulgaris subsp. vulgaris]	GO:0005524(ATP binding);GO:0006508(proteolysis);GO:0008233(peptidase activity);GO:0009507(chloroplast)	NA	NA	NA	1.16	1	1.15	2.47	2.64	2.27	4.38	4.4	3.37	3.48	3.4	3.47	7.72	6.58	7.44	9.1756e-68	7.47762e-67
Bv2_037310_qqwg	blue	559.15	PREDICTED: zinc finger protein ZAT12 [Beta vulgaris subsp. vulgaris]	GO:0003700(DNA binding transcription factor activity);GO:0005634(nucleus);GO:0010200(response to chitin);GO:0043565(sequence-specific DNA binding);GO:0044212(transcription regulatory region DNA binding)	NA	NA	NA	13.5	14.91	14.67	4.38	3.71	3.66	14.36	13.74	12.42	15.86	17.14	14.66	37.73	37.36	39.34	3.51652e-257	1.75767e-255
Bv7_171420_dcuk	blue	558.84	hypothetical protein BVRB_7g171420 [Beta vulgaris subsp. vulgaris]	NA	NA	NA	NA	5.49	6.58	5.88	11.54	10.51	8.01	21.86	19.68	17.73	18.38	18.63	17.04	30.41	36.94	35.42	4.55474e-69	3.80492e-68
Bv2_031870_hreu	blue	557.757	PREDICTED: uncharacterized protein LOC104884897 isoform X1 [Beta vulgaris subsp. vulgaris]	GO:0009507(chloroplast);GO:0016021(integral component of membrane)	04122(Sulfur relay system)	K11996	EC:2.7.7.80;EC:2.8.1.11	105.86	122.65	112.92	118.86	122.97	115.72	177.16	182.06	184.12	231.48	215.13	222.74	297.58	265.73	286.23	3.57707e-71	3.10197e-70
Bv6_127650_uios	blue	557.599	PREDICTED: peamaclein-like [Beta vulgaris subsp. vulgaris]	GO:0005576(extracellular region);GO:0009739(response to gibberellin);GO:0009740(gibberellic acid mediated signaling pathway)	NA	NA	NA	3.07	3.62	2.8	3.25	2.76	2.54	10.18	10.19	10.44	14.84	15.43	13.15	20.54	22.07	21.16	1.54926e-256	7.70096e-255
Bv6_129570_pira	blue	556.983	0	NA	NA	NA	NA	441.36	500	478.46	639.95	631.54	587.99	1033.5	1034.3	972.61	906.42	928.05	893.57	1485.77	1323.64	1361.41	3.92132e-12	7.60921e-12
Bv3_066270_maaq	blue	556.247	PREDICTED: protein IQ-DOMAIN 14 [Beta vulgaris subsp. vulgaris]	GO:0005516(calmodulin binding);GO:0005794(Golgi apparatus);GO:0008150(biological_process)	NA	NA	NA	17.22	18.89	21.51	38.89	43.25	43.74	57.61	58.31	57.66	46.92	47.04	44.76	126.63	111.64	128.34	1.96247e-176	5.509e-175
Bv1_020290_jpet	blue	555.688	PREDICTED: mechanosensitive ion channel protein 2, chloroplastic [Beta vulgaris subsp. vulgaris]	GO:0005216(ion channel activity);GO:0005886(plasma membrane);GO:0006811(ion transport);GO:0009507(chloroplast);GO:0009526(plastid envelope);GO:0009657(plastid organization);GO:0010020(chloroplast fission);GO:0016020(membrane);GO:0016021(integral component of membrane);GO:0031969(chloroplast membrane);GO:0055085(transmembrane transport)	NA	NA	NA	51.1	58.37	59.39	72.1	72.75	72.41	88.95	90.88	89.8	86.06	84.75	87.7	133.47	115.27	124.44	2.44148e-34	1.02573e-33
Bv6_129820_ejjo	blue	554.726	PREDICTED: transmembrane and coiled-coil domain-containing protein 4 [Beta vulgaris subsp. vulgaris]	GO:0003674(molecular_function);GO:0008150(biological_process);GO:0009507(chloroplast);GO:0016021(integral component of membrane)	NA	NA	NA	8.71	10.43	10.48	12.47	11.87	12.69	16.14	17.19	17.87	18.4	17.83	19.69	25.02	23.01	26.06	4.45307e-54	2.85867e-53
Bv9_202740_phwc	blue	554.629	hypothetical protein BVRB_9g202740 [Beta vulgaris subsp. vulgaris]	NA	NA	NA	NA	1.71	2.13	1.84	0.58	0.84	0.49	1.85	1.76	1.31	5.63	7.69	5.02	19.18	17.63	15.48	1.27249e-77	1.23103e-76
Bv8_194020_jwkr	blue	554.302	hypothetical protein BVRB_8g194020 [Beta vulgaris subsp. vulgaris]	GO:0005515(protein binding)	NA	NA	NA	0.45	0.38	0.33	9.95	11.85	9.93	6.39	6.07	5.41	23.22	27.17	27.5	85.09	79.26	77.7	0	0
Bv2_040720_ypwh	blue	554.238	PREDICTED: thaumatin-like protein [Beta vulgaris subsp. vulgaris]	GO:0003674(molecular_function);GO:0005576(extracellular region);GO:0051707(response to other organism)	03440(Homologous recombination)	K12173	NA	0.15	0.14	0.08	1.86	1.37	1.79	9.7	9.04	8.84	23.28	21.71	18.64	36.01	34.22	33.41	0	0
Bv6_140930_wtre	blue	553.628	hypothetical protein BVRB_6g140930 isoform B [Beta vulgaris subsp. vulgaris];hypothetical protein BVRB_6g140930 isoform A [Beta vulgaris subsp. vulgaris]	GO:0005215(transporter activity);GO:0016021(integral component of membrane);GO:0055085(transmembrane transport);GO:0055085(transmembrane transport)	NA	NA	NA	0	0	0	0	0	0	0	0.26	0.45	0.62	0.37	0.24	6.23	5.99	6.26	4.89493e-41	2.43112e-40
Bv2_025040_yezx	blue	553.006	hypothetical protein BVRB_2g025040 [Beta vulgaris subsp. vulgaris]	NA	NA	NA	NA	0.27	0.45	0.41	0	0.15	0.07	0.63	0.58	0.74	0.38	0.38	0.41	3.87	3.21	3.32	1.43743e-34	6.07305e-34
Bv4_090530_xrpq	blue	552.961	PREDICTED: poly(A)-specific ribonuclease PARN isoform X1 [Beta vulgaris subsp. vulgaris]	GO:0003676(nucleic acid binding);GO:0003723(RNA binding);GO:0004535(poly(A)-specific ribonuclease activity);GO:0004540(ribonuclease activity);GO:0005634(nucleus);GO:0005739(mitochondrion);GO:0006397(mRNA processing);GO:0006952(defense response);GO:0006970(response to osmotic stress);GO:0009451(RNA modification);GO:0009651(response to salt stress);GO:0009737(response to abscisic acid);GO:0009751(r…	03018(RNA degradation)	K01148	EC:3.1.13.4	7.46	8.31	9.09	9.36	8.25	8.08	12.61	12.65	14.08	13.87	13.69	13.83	19.15	21.66	18.39	6.8472e-25	2.212e-24
Bv4_080050_ocda	blue	552.912	PREDICTED: alkaline/neutral invertase A, mitochondrial [Beta vulgaris subsp. vulgaris]	GO:0004564(beta-fructofuranosidase activity);GO:0004575(sucrose alpha-glucosidase activity);GO:0005739(mitochondrion);GO:0005987(sucrose catabolic process);GO:0033926(glycopeptide alpha-N-acetylgalactosaminidase activity);GO:0042542(response to hydrogen peroxide);GO:0048364(root development)	03010(Ribosome)	K02986	NA	8.36	9.39	7.91	15.91	15.41	16.22	16.87	16.53	16.97	21.13	18.99	20.84	36.35	33.1	34.42	3.64663e-108	5.29601e-107
Bv3_054150_nnhe	blue	552.592	PREDICTED: UDP-glycosyltransferase 88B1 [Beta vulgaris subsp. vulgaris]	GO:0009813(flavonoid biosynthetic process);GO:0043231(intracellular membrane-bounded organelle);GO:0052696(flavonoid glucuronidation);GO:0080043(quercetin 3-O-glucosyltransferase activity);GO:0080044(quercetin 7-O-glucosyltransferase activity)	00942(Anthocyanin biosynthesis)	K12938	EC:2.4.1.-	4.12	3.93	4.86	15.33	16.72	15.92	35.59	34.49	37.52	34.18	35.44	29.74	56.48	60.77	67.43	1.68946e-262	8.68575e-261
Bv9_217390_nzak	blue	552.382	hypothetical protein BVRB_9g217390 [Beta vulgaris subsp. vulgaris]	GO:0000038(very long-chain fatty acid metabolic process);GO:0005634(nucleus);GO:0006633(fatty acid biosynthetic process);GO:0016021(integral component of membrane);GO:0042335(cuticle development);GO:0102336(3-oxo-arachidoyl-CoA synthase activity);GO:0102337(3-oxo-cerotoyl-CoA synthase activity);GO:0102338(3-oxo-lignoceronyl-CoA synthase activity);GO:0102756(very-long-chain 3-ketoacyl-CoA synthase…	00062(Fatty acid elongation)	K15397	EC:2.3.1.199	17.82	20.23	18.6	25.58	18.43	20.63	20.19	22.06	19.72	30.84	26.29	27.38	63.98	66.25	64.61	3.0884e-49	1.81907e-48
Bv5_115690_zuju	blue	551.697	PREDICTED: monosaccharide-sensing protein 2 [Beta vulgaris subsp. vulgaris]	GO:0005351(carbohydrate:proton symporter activity);GO:0005355(glucose transmembrane transporter activity);GO:0005887(integral component of plasma membrane);GO:0046323(glucose import)	NA	NA	NA	0.92	1.12	0.96	0.77	0.95	0.81	5.73	5.55	5.83	7.36	6.65	6.93	10.75	9.57	10.66	1.18238e-268	6.29458e-267
Bv1_004570_oxzh	blue	551.56	PREDICTED: U-box domain-containing protein 33 isoform X2 [Beta vulgaris subsp. vulgaris];hypothetical protein BVRB_1g004570 isoform A [Beta vulgaris subsp. vulgaris]	GO:0004674(protein serine/threonine kinase activity);GO:0004842(ubiquitin-protein transferase activity);GO:0005524(ATP binding);GO:0005886(plasma membrane);GO:0006468(protein phosphorylation);GO:0016301(kinase activity);GO:0016567(protein ubiquitination);GO:0046777(protein autophosphorylation);GO:0046777(protein autophosphorylation)	NA	NA	NA	5.79	6.6	7.81	5.99	4.87	5.72	8.15	9.53	8.44	7.45	8.56	8.7	17.91	13.65	16.37	1.17988e-18	3.06671e-18
Bv3_064440_atfy	blue	551.393	hypothetical protein BVRB_3g064440 isoform A [Beta vulgaris subsp. vulgaris];PREDICTED: L-2-hydroxyglutarate dehydrogenase, mitochondrial [Beta vulgaris subsp. vulgaris]	GO:0003973((S)-2-hydroxy-acid oxidase activity);GO:0005739(mitochondrion);GO:0016491(oxidoreductase activity);GO:0047545(2-hydroxyglutarate dehydrogenase activity);GO:0055114(oxidation-reduction process);GO:0071949(FAD binding);GO:0071949(FAD binding)	00650(Butanoate metabolism);00650(Butanoate metabolism)	K00109	EC:1.1.99.2	2.89	3.43	3.81	3.9	3.94	3.31	3.61	3.52	4.2	4.24	4.41	4.44	8.72	7.72	8.83	5.06484e-16	1.17976e-15
Bv6_152350_oxkc	blue	551.299	PREDICTED: cold and drought-regulated protein CORA [Beta vulgaris subsp. vulgaris]	NA	NA	NA	NA	94.72	95.18	101.52	360.33	368.7	385.7	688.22	690.36	680.83	781.94	809.27	816.88	1272.08	1146.58	1387.81	4.36084e-89	4.94448e-88
Bv6_153070_coxk	blue	550.758	PREDICTED: protein O-linked-mannose beta-1,4-N-acetylglucosaminyltransferase 2-like [Beta vulgaris subsp. vulgaris]	GO:0005576(extracellular region)	00514(Other types of O-glycan biosynthesis)	K18134	EC:2.4.1.255	3.15	4	4.08	4.9	5.86	7.92	26.39	23.7	22.44	28.89	30.4	29.97	44.57	40.44	45.72	8.4895e-145	1.80781e-143
Bv8_185040_wpdg	blue	549.797	0	NA	NA	NA	NA	49.36	54.5	50.81	92.24	85.15	81.44	77.71	68.77	61.91	128.38	128.52	119.38	280.01	264.55	280.77	9.30003e-157	2.21356e-155
Bv3_059440_hkkt	blue	549.789	PREDICTED: uncharacterized protein LOC104889084 [Beta vulgaris subsp. vulgaris]	GO:0003674(molecular_function);GO:0005634(nucleus);GO:0005794(Golgi apparatus);GO:0005829(cytosol);GO:0005886(plasma membrane);GO:0009269(response to desiccation);GO:0009506(plasmodesma);GO:0009735(response to cytokinin);GO:0009793(embryo development ending in seed dormancy);GO:0016020(membrane);GO:0046686(response to cadmium ion)	NA	NA	NA	100.39	116.33	112.96	112.44	111.79	108.94	190.14	186.78	185.09	190.93	193.46	191.87	257.72	242.57	240.19	9.25357e-29	3.3611e-28
Bv6_153270_sitd	blue	549.586	PREDICTED: protein argonaute 7 [Beta vulgaris subsp. vulgaris]	GO:0003723(RNA binding);GO:0005737(cytoplasm);GO:0006351(transcription, DNA-templated);GO:0006355(regulation of transcription, DNA-templated);GO:0010050(vegetative phase change);GO:0010267(production of ta-siRNAs involved in RNA interference);GO:0010599(production of lsiRNA involved in RNA interference);GO:0016246(RNA interference);GO:0035195(gene silencing by miRNA);GO:0035196(production of miRN…	NA	NA	NA	11.79	13.1	12.08	7.01	7.55	6.67	13.79	12.23	12.86	14.42	12.23	13.96	27.47	22.79	27.73	6.82884e-46	3.73036e-45
Bv5_109500_srsf	blue	549.287	PREDICTED: inositol 4-methyltransferase [Beta vulgaris subsp. vulgaris]	GO:0005829(cytosol);GO:0008171(O-methyltransferase activity);GO:0008757(S-adenosylmethionine-dependent methyltransferase activity);GO:0019438(aromatic compound biosynthetic process)	NA	NA	NA	0.55	1.05	0.93	112.16	106.48	103.72	368.82	361.04	359.12	391.15	377.22	382.49	641.57	589.47	626.57	5.83345e-287	3.44154e-285
Bv3_048200_womc	blue	549.268	PREDICTED: uncharacterized protein LOC104887867 [Beta vulgaris subsp. vulgaris]	GO:0003674(molecular_function);GO:0005829(cytosol);GO:0008150(biological_process);GO:0009507(chloroplast);GO:0009570(chloroplast stroma)	NA	NA	NA	4.63	4.93	3.86	4.38	5.43	4.34	7.82	8.66	6.7	8.71	9.6	7.67	12.11	11.44	12.33	2.97483e-30	1.12197e-29
Bv4_096730_kwcn	blue	549.255	PREDICTED: uncharacterized protein LOC104907711 [Beta vulgaris subsp. vulgaris]	NA	NA	NA	NA	4.27	5.26	4.35	69.49	68.89	70.21	74.68	74.5	73.53	130.48	139.68	146.38	263.91	268.21	279.06	0	0
Bv6_130350_rddm	blue	548.757	PREDICTED: mannose/glucose-specific lectin [Beta vulgaris subsp. vulgaris]	GO:0000771(agglutination involved in conjugation);GO:0005536(glucose binding);GO:0005537(mannose binding);GO:0005575(cellular_component)	NA	NA	NA	2.06	2.06	1.67	4.67	4.51	7.73	5.87	5.74	7.42	16.08	16.4	13.69	123.61	99.42	100.95	0	0
Bv1_021040_fyhn	blue	548.331	hypothetical protein BVRB_1g021040 [Beta vulgaris subsp. vulgaris]	GO:0005618(cell wall);GO:0033609(oxalate metabolic process);GO:0046564(oxalate decarboxylase activity)	NA	NA	NA	0.81	1.17	0.77	0.62	0.42	0.62	0.82	1.24	0.91	2.29	2.27	1.73	6.11	4.49	4.71	4.80752e-29	1.75826e-28
Bv9_218460_cdhq	blue	547.24	PREDICTED: uncharacterized protein LOC104904444 [Beta vulgaris subsp. vulgaris]	GO:0051213(dioxygenase activity)	00940(Phenylpropanoid biosynthesis)	K06892	EC:1.14.11.-	0	0.19	0.17	0.55	0.67	0.19	1.76	1.3	1.86	3.05	2.82	2.46	4.38	5.71	4.92	5.29859e-29	1.93393e-28
Bv_009370_qwwe	blue	546.839	PREDICTED: uncharacterized protein LOC104884553 [Beta vulgaris subsp. vulgaris]	GO:0003674(molecular_function);GO:0008150(biological_process);GO:0016020(membrane);GO:0016021(integral component of membrane)	NA	NA	NA	0.15	0.42	0.1	0.7	0.59	0.77	2.91	2.31	2.95	1.03	1.1	1.06	18.05	14.58	18.22	2.60629e-190	8.01667e-189
Bv_012900_zhot	blue	546.516	PREDICTED: E3 ubiquitin-protein ligase KEG [Beta vulgaris subsp. vulgaris]	GO:0004674(protein serine/threonine kinase activity);GO:0005737(cytoplasm);GO:0006468(protein phosphorylation)	NA	NA	NA	6.67	7.36	8.48	12.42	12.57	13.76	17.18	17.51	16.03	18.32	17.8	17.85	26.34	26.15	29.72	1.99879e-81	2.03544e-80
Bv3_054780_jnai	blue	546	PREDICTED: serine carboxypeptidase-like 33 [Beta vulgaris subsp. vulgaris]	GO:0004185(serine-type carboxypeptidase activity);GO:0005773(vacuole);GO:0051603(proteolysis involved in cellular protein catabolic process)	NA	NA	NA	18.32	24.38	24.77	24.94	24.28	22.53	50.78	54.84	50.94	69.54	64.25	70.25	93.42	88.96	90.34	1.4255e-139	2.91815e-138
Bv6_129180_hszz	blue	545.982	PREDICTED: mannan endo-1,4-beta-mannosidase 7 [Beta vulgaris subsp. vulgaris]	GO:0016985(mannan endo-1,4-beta-mannosidase activity);GO:0046355(mannan catabolic process)	00051(Fructose and mannose metabolism)	K19355	EC:3.2.1.78	18.91	20.89	22.8	25.5	24.03	23.63	46.75	47.83	49.27	77.29	75.24	70.46	106.2	95.97	102.79	1.97807e-198	6.48331e-197
Bv9_220490_qkoy	blue	545.821	PREDICTED: F-box/kelch-repeat protein At1g80440 [Beta vulgaris subsp. vulgaris]	GO:0003674(molecular_function);GO:0005634(nucleus);GO:0005829(cytosol);GO:0019005(SCF ubiquitin ligase complex);GO:0030162(regulation of proteolysis);GO:0031625(ubiquitin protein ligase binding);GO:0043161(proteasome-mediated ubiquitin-dependent protein catabolic process);GO:0080037(negative regulation of cytokinin-activated signaling pathway);GO:2000762(regulation of phenylpropanoid metabolic pr…	NA	NA	NA	77.88	95.48	96.1	128.03	134.56	126.42	208.45	211.28	203.56	154.74	153.79	146.67	341.15	320.11	343.02	1.93365e-135	3.77785e-134
Bv2_033270_kaqs	blue	545.129	PREDICTED: serine hydroxymethyltransferase 3, chloroplastic [Beta vulgaris subsp. vulgaris]	GO:0004372(glycine hydroxymethyltransferase activity);GO:0005737(cytoplasm);GO:0005829(cytosol);GO:0006544(glycine metabolic process);GO:0006563(L-serine metabolic process);GO:0009507(chloroplast);GO:0009536(plastid);GO:0009570(chloroplast stroma);GO:0019264(glycine biosynthetic process from serine);GO:0030170(pyridoxal phosphate binding);GO:0035999(tetrahydrofolate interconversion)	00630(Glyoxylate and dicarboxylate metabolism);00260(Glycine, serine and threonine metabolism);00460(Cyanoamino acid metabolism);00670(One carbon pool by folate)	K00600	EC:2.1.2.1	5.25	6.24	6.04	4.6	4.78	4.19	7.21	6.62	6.79	8.94	9.21	8.51	12.77	11.14	11.68	1.0565e-46	5.87838e-46
Bv6_149030_cndy	blue	544.773	PREDICTED: probable xyloglucan endotransglucosylase/hydrolase protein 33 [Beta vulgaris subsp. vulgaris]	GO:0004553(hydrolase activity, hydrolyzing O-glycosyl compounds);GO:0005576(extracellular region);GO:0005618(cell wall);GO:0005887(integral component of plasma membrane);GO:0009831(plant-type cell wall modification involved in multidimensional cell growth);GO:0010411(xyloglucan metabolic process);GO:0016762(xyloglucan:xyloglucosyl transferase activity);GO:0016798(hydrolase activity, acting on gly…	NA	NA	NA	21.73	24.17	26.92	25.33	23.92	24.21	15.16	18.68	14.64	20.13	20.7	20.23	3.64	3.3	3.18	1.11699e-96	1.3919e-95
Bv6_127340_nays	blue	544.656	PREDICTED: cysteine proteinase COT44 [Beta vulgaris subsp. vulgaris]	GO:0004197(cysteine-type endopeptidase activity);GO:0005615(extracellular space);GO:0005764(lysosome);GO:0051603(proteolysis involved in cellular protein catabolic process)	04145(Phagosome)	K01365	EC:3.4.22.15	67.05	76.51	69.22	85.46	97.21	85.09	70.6	83.41	76.11	109.31	123.24	123.23	494.32	474.45	528.19	0	0
Bv9_205110_cyxs	blue	544.605	PREDICTED: switch 2 isoform X1 [Beta vulgaris subsp. vulgaris];hypothetical protein BVRB_9g205110 isoform B [Beta vulgaris subsp. vulgaris]	GO:0004386(helicase activity);GO:0005634(nucleus);GO:0016020(membrane);GO:0016020(membrane)	NA	NA	NA	19.09	21.77	24.94	26.34	21.97	22.08	32.63	35.55	30.85	30.78	31.32	33.21	50.18	42.55	44.91	1.63031e-19	4.38045e-19
Bv5_119400_etzo	blue	544.598	PREDICTED: late embryogenesis abundant protein D-34 [Beta vulgaris subsp. vulgaris]	GO:0003674(molecular_function);GO:0005634(nucleus);GO:0005730(nucleolus);GO:0005737(cytoplasm);GO:0005829(cytosol);GO:0006873(cellular ion homeostasis);GO:0006970(response to osmotic stress);GO:0009414(response to water deprivation);GO:0009737(response to abscisic acid);GO:0009793(embryo development ending in seed dormancy);GO:0009845(seed germination);GO:0010226(response to lithium ion)	NA	NA	NA	0	0	0	0	0	0	0	0	0	0.48	0.43	0.54	3.97	3.09	3.12	5.74577e-82	5.90797e-81
Bv_002840_unhp	blue	544.581	hypothetical protein BVRB_002840 [Beta vulgaris subsp. vulgaris]	NA	NA	NA	NA	0.16	0.39	0.25	0.31	0.14	0.24	0.54	0.45	0.67	0.66	0.79	0.65	1.81	1.38	1.26	2.62066e-15	5.90411e-15
Bv8_182580_ugtj	blue	544.255	hypothetical protein BVRB_8g182580 [Beta vulgaris subsp. vulgaris]	GO:0003674(molecular_function);GO:0008150(biological_process)	NA	NA	NA	213.15	244.21	223.22	266.38	273.6	251.64	408.21	421.65	378.93	396.96	434.5	379.07	515.33	535.87	592.81	5.7272e-29	2.08952e-28
Bv6_131100_fnux	blue	543.442	PREDICTED: ACT domain-containing protein ACR6 isoform X1 [Beta vulgaris subsp. vulgaris]	GO:0009507(chloroplast);GO:0016597(amino acid binding)	NA	NA	NA	3.26	3.41	3.96	1.33	1.04	1.26	3.93	3.89	3.73	4.32	3.81	4.08	8.2	7.65	8.42	5.71392e-86	6.19748e-85
Bv8_202040_fkxj	blue	543.437	PREDICTED: potassium channel KAT3 isoform X1 [Beta vulgaris subsp. vulgaris]	GO:0005249(voltage-gated potassium channel activity);GO:0005887(integral component of plasma membrane);GO:0042391(regulation of membrane potential)	NA	NA	NA	105.15	114.68	112.01	110.95	111.4	111.8	57.1	61.05	55.93	57.54	67.3	60.99	20.49	17.9	23.51	7.66002e-175	2.12053e-173
Bv5_119090_hyjc	blue	543.322	hypothetical protein BVRB_5g119090 [Beta vulgaris subsp. vulgaris]	GO:0003723(RNA binding);GO:0004521(endoribonuclease activity);GO:0005576(extracellular region);GO:0005622(intracellular);GO:0005773(vacuole);GO:0005783(endoplasmic reticulum);GO:0006401(RNA catabolic process);GO:0007568(aging);GO:0010168(ER body);GO:0010507(negative regulation of autophagy);GO:0016075(rRNA catabolic process);GO:0033897(ribonuclease T2 activity)	NA	NA	NA	17.91	20.29	21.08	25.28	27.35	23.42	31.41	31.15	32.84	27.16	28.44	28.8	55.85	47.26	48.81	4.79628e-59	3.37786e-58
Bv7_168920_tdft	blue	542.858	PREDICTED: uncharacterized protein LOC104899662 [Beta vulgaris subsp. vulgaris]	GO:0004806(triglyceride lipase activity);GO:0006629(lipid metabolic process);GO:0009507(chloroplast)	NA	NA	NA	0	0	0	0	0	0.11	0.47	0.29	0.29	2.49	2.14	2.05	39.13	37.84	41.67	0	0
Bv6_154200_ygec	blue	542.625	PREDICTED: transcription factor TCP15 [Beta vulgaris subsp. vulgaris]	GO:0003677(DNA binding);GO:0003700(DNA binding transcription factor activity);GO:0005515(protein binding);GO:0005634(nucleus);GO:0006351(transcription, DNA-templated);GO:0006355(regulation of transcription, DNA-templated);GO:0008283(cell proliferation);GO:0009735(response to cytokinin);GO:0009737(response to abscisic acid);GO:0009739(response to gibberellin);GO:0010029(regulation of seed germinat…	04712(Circadian rhythm - plant)	K16221	NA	4.23	4.09	4.61	4.05	4.38	3.8	4.88	4.6	5.51	4.7	4.62	4.1	14.1	13.25	14.39	5.20729e-61	3.78586e-60
Bv4_089790_hkff	blue	542.615	PREDICTED: putative MO25-like protein At5g47540 [Beta vulgaris subsp. vulgaris]	GO:0005737(cytoplasm);GO:0008150(biological_process);GO:0008150(biological_process)	NA	NA	NA	9.56	10.18	12.27	17.69	16.77	15.5	18.54	18.69	18.16	18.6	21.62	19.54	32.75	33.27	31.63	1.44318e-37	6.56271e-37
Bv3_066850_mcmq	blue	542.593	PREDICTED: biogenesis of lysosome-related organelles complex 1 subunit 2-like isoform X1 [Beta vulgaris subsp. vulgaris]	NA	NA	NA	NA	1.2	1.12	0.77	0.08	0.02	0	0.8	1.04	1.06	1.63	1.98	1.48	3.81	3.36	4.21	3.96713e-84	4.19909e-83
Bv6_134080_qgyi	blue	542.585	PREDICTED: uncharacterized protein LOC104895545 [Beta vulgaris subsp. vulgaris]	NA	NA	NA	NA	1.64	1.64	1.83	4.87	4.96	5.12	9.8	11.2	10.29	20.92	23.15	22.92	37.17	30.57	37.98	9.35628e-240	4.11631e-238
Bv9_221760_jsxw	blue	542.215	hypothetical protein BVRB_9g221760 [Beta vulgaris subsp. vulgaris]	GO:0003674(molecular_function);GO:0005575(cellular_component);GO:0008150(biological_process)	NA	NA	NA	2.49	2.44	2.26	3.78	2.81	3.17	4.14	4.65	3.31	4.28	4.47	4.49	7.7	6.31	7.09	1.30437e-10	2.35485e-10
Bv6_150730_oqsa	blue	542.103	PREDICTED: probable methyltransferase At1g27930 [Beta vulgaris subsp. vulgaris]	GO:0000502(proteasome complex);GO:0005739(mitochondrion);GO:0005768(endosome);GO:0005794(Golgi apparatus);GO:0005802(trans-Golgi network);GO:0008168(methyltransferase activity);GO:0016021(integral component of membrane);GO:0032259(methylation);GO:0045492(xylan biosynthetic process)	NA	NA	NA	0.06	0.12	0.11	0.63	0.28	0.12	0.59	0.51	0.44	1.8	2.12	1.26	3.47	3.73	4.32	8.19635e-34	3.4077e-33
Bv1_008980_shaj	blue	542.028	PREDICTED: probable pectin methyltransferase QUA2 isoform X1 [Beta vulgaris subsp. vulgaris]	GO:0005768(endosome);GO:0005774(vacuolar membrane);GO:0005802(trans-Golgi network);GO:0008757(S-adenosylmethionine-dependent methyltransferase activity);GO:0032259(methylation)	NA	NA	NA	43.32	51.15	48.49	57.86	57.83	58.77	42.75	43.88	43.62	45.05	45.56	41.81	21.52	17.3	16.79	5.66208e-70	4.80583e-69
Bv4_081770_igow	blue	541.961	hypothetical protein BVRB_4g081770 [Beta vulgaris subsp. vulgaris]	NA	NA	NA	NA	0.08	0.07	0.09	0.09	0.08	0	0.31	0.14	0	0.57	0.67	0.62	1.35	1.62	1.78	2.31615e-10	4.13337e-10
Bv6_143730_mggd	blue	541.476	PREDICTED: serine hydroxymethyltransferase 6 [Beta vulgaris subsp. vulgaris]	GO:0004372(glycine hydroxymethyltransferase activity);GO:0005634(nucleus);GO:0005737(cytoplasm);GO:0006544(glycine metabolic process);GO:0006563(L-serine metabolic process);GO:0019264(glycine biosynthetic process from serine);GO:0030170(pyridoxal phosphate binding);GO:0035999(tetrahydrofolate interconversion);GO:0044030(regulation of DNA methylation);GO:0046500(S-adenosylmethionine metabolic proc…	00630(Glyoxylate and dicarboxylate metabolism);00260(Glycine, serine and threonine metabolism);00460(Cyanoamino acid metabolism);00670(One carbon pool by folate)	K00600	EC:2.1.2.1	23.04	28.83	27.87	42.49	41.49	41.51	54.8	54.97	54.17	50.86	52.16	46.86	85.66	82.79	80.03	1.02744e-72	9.15232e-72
Bv4_072500_mhcr	blue	541.278	hypothetical protein BVRB_4g072500 [Beta vulgaris subsp. vulgaris]	GO:0004854(xanthine dehydrogenase activity);GO:0005829(cytosol);GO:0009115(xanthine catabolic process);GO:0016903(oxidoreductase activity, acting on the aldehyde or oxo group of donors);GO:0050660(flavin adenine dinucleotide binding)	00230(Purine metabolism);00232(Caffeine metabolism);04146(Peroxisome)	K00106	EC:1.17.1.4;EC:1.17.3.2	14.64	16.08	16.45	25.19	25.19	26.78	28.09	28.66	29.82	34.84	33.93	33.49	51.07	47.36	49.65	7.87039e-92	9.26831e-91
Bv5_104060_xnon	blue	541.121	PREDICTED: probable lysophospholipase BODYGUARD 3 [Beta vulgaris subsp. vulgaris]	GO:0016787(hydrolase activity)	NA	NA	NA	47.5	56.09	58.07	61.33	59.95	57.26	49.6	44.46	49.2	43.73	46.82	48.93	26.59	22.84	25.22	8.23256e-38	3.76747e-37
Bv1_021020_qtds	blue	541.106	PREDICTED: catalase [Beta vulgaris subsp. vulgaris]	GO:0004096(catalase activity);GO:0005737(cytoplasm);GO:0020037(heme binding);GO:0042542(response to hydrogen peroxide);GO:0042744(hydrogen peroxide catabolic process)	00630(Glyoxylate and dicarboxylate metabolism);00380(Tryptophan metabolism);04016(MAPK signaling pathway - plant);04146(Peroxisome)	K03781	EC:1.11.1.6	335.08	372.4	379.18	132.64	128.03	134.52	473.18	462.84	476.77	501.67	502.92	514.96	869.12	793.31	865.86	8.45846e-39	3.98747e-38
Bv5_108480_xttp	blue	541.062	hypothetical protein BVRB_5g108480 [Beta vulgaris subsp. vulgaris]	NA	NA	NA	NA	0.83	1.52	1.57	1.17	0.98	0.54	1.2	1.74	1.6	1.44	1.92	1.56	4.66	4.47	4.02	7.20935e-19	1.89159e-18
Bv8_191110_kfqo	blue	540.734	PREDICTED: uncharacterized protein LOC104901692 [Beta vulgaris subsp. vulgaris]	GO:0000151(ubiquitin ligase complex);GO:0000209(protein polyubiquitination);GO:0005737(cytoplasm);GO:0031624(ubiquitin conjugating enzyme binding);GO:0032436(positive regulation of proteasomal ubiquitin-dependent protein catabolic process);GO:0061630(ubiquitin protein ligase activity)	NA	NA	NA	1.66	1.56	2.32	2.39	3.25	2.59	3.22	4.81	4.66	4.87	5.09	4.99	7.64	9.42	10.02	1.36006e-23	4.20786e-23
Bv6_127870_crju	blue	540.04	PREDICTED: CDT1-like protein a, chloroplastic [Beta vulgaris subsp. vulgaris]	GO:0000076(DNA replication checkpoint);GO:0004693(cyclin-dependent protein serine/threonine kinase activity);GO:0005515(protein binding);GO:0005634(nucleus);GO:0006260(DNA replication);GO:0007049(cell cycle);GO:0009507(chloroplast);GO:0009658(chloroplast organization);GO:0019901(protein kinase binding);GO:0048229(gametophyte development);GO:0051276(chromosome organization);GO:0070182(DNA polymera…	NA	NA	NA	5.87	5.85	6.86	7.16	6.43	7.18	6.74	6.43	6.36	9.34	8.47	8.54	15.65	14.21	14.27	1.11565e-34	4.72577e-34
Bv9_211640_ynak	blue	539.843	PREDICTED: uncharacterized protein LOC104903696 [Beta vulgaris subsp. vulgaris]	GO:0005739(mitochondrion);GO:0005768(endosome);GO:0005794(Golgi apparatus);GO:0005802(trans-Golgi network);GO:0008375(acetylglucosaminyltransferase activity);GO:0016021(integral component of membrane);GO:0016757(transferase activity, transferring glycosyl groups)	NA	NA	NA	5.54	3.11	3.58	9.56	9.95	7.8	28.14	29.62	22.67	34.7	31.16	35.65	52.19	45.13	50.63	4.53281e-86	4.93128e-85
Bv1_018390_yypw	blue	539.697	PREDICTED: uncharacterized protein DDB_G0271670 [Beta vulgaris subsp. vulgaris]	GO:0005575(cellular_component)	NA	NA	NA	0.36	0.98	0.8	0.81	0.66	0.49	0.65	1.09	0.89	1.19	1.15	1.29	3.24	2.4	3.18	1.0915e-16	2.62117e-16
Bv_001110_zdwu	blue	539.498	PREDICTED: auxin-binding protein ABP19a [Beta vulgaris subsp. vulgaris]	GO:0005618(cell wall);GO:0033609(oxalate metabolic process);GO:0046564(oxalate decarboxylase activity)	NA	NA	NA	0.17	0.12	0.05	0.2	0.34	0.08	0.24	0.38	0.17	0.72	0.63	0.97	2.52	1.73	2.21	5.56232e-21	1.57744e-20
Bv5_098000_gaxu	blue	539.213	PREDICTED: auxin-responsive protein SAUR36-like [Beta vulgaris subsp. vulgaris]	GO:0003674(molecular_function);GO:0005739(mitochondrion);GO:0009733(response to auxin)	04075(Plant hormone signal transduction)	K14488	NA	1.17	2.03	1.53	1.11	0.92	0.89	2.79	2.94	2.73	1.61	1.99	1.56	6.59	6.55	5.91	4.9279e-58	3.40786e-57
Bv9_216970_pddk	blue	539.085	PREDICTED: chromatin remodeling protein EBS [Beta vulgaris subsp. vulgaris]	GO:0000785(chromatin);GO:0000976(transcription regulatory region sequence-specific DNA binding);GO:0003682(chromatin binding);GO:0005677(chromatin silencing complex);GO:0006342(chromatin silencing);GO:0031507(heterochromatin assembly)	NA	NA	NA	13.43	15.77	13.96	20.47	20.26	16.45	32.58	29.4	29.29	34.06	41.23	34.65	48.64	47.56	55.93	2.85311e-53	1.8039e-52
Bv9_221710_zgrm	blue	538.934	hypothetical protein BVRB_9g221710 [Beta vulgaris subsp. vulgaris]	GO:0003674(molecular_function);GO:0005575(cellular_component);GO:0008150(biological_process)	NA	NA	NA	3.63	3.74	3.27	5.18	6.03	4.07	6.25	5.14	5.6	7.05	9.06	7.06	12.66	14.44	15.08	2.06575e-24	6.56502e-24
Bv3_065020_ypfo	blue	538.854	PREDICTED: oil body-associated protein 1A [Beta vulgaris subsp. vulgaris]	GO:0003674(molecular_function);GO:0005811(lipid droplet);GO:0009737(response to abscisic acid);GO:0009793(embryo development ending in seed dormancy);GO:0010344(seed oilbody biogenesis);GO:0019915(lipid storage)	NA	NA	NA	0.06	0.04	0	1.27	1.13	1.19	0.08	0.07	0.08	2.84	2.9	2.99	29.8	28.04	30.9	0	0
Bv7_162230_sqdq	blue	538.835	PREDICTED: uncharacterized protein LOC104898702 [Beta vulgaris subsp. vulgaris]	GO:0005737(cytoplasm);GO:0008757(S-adenosylmethionine-dependent methyltransferase activity);GO:0032259(methylation)	NA	NA	NA	159.84	183.97	172.71	315.77	320.61	316.37	421.27	421.61	408.65	335.82	320.13	310.85	835.8	809.53	812.29	1.64709e-42	8.4414e-42
Bv_000370_cufa	blue	538.566	PREDICTED: homeobox-leucine zipper protein ATHB-12-like [Beta vulgaris subsp. vulgaris]	GO:0003700(DNA binding transcription factor activity);GO:0005515(protein binding);GO:0005634(nucleus);GO:0006351(transcription, DNA-templated);GO:0006355(regulation of transcription, DNA-templated);GO:0006970(response to osmotic stress);GO:0007275(multicellular organism development);GO:0009414(response to water deprivation);GO:0009615(response to virus);GO:0009651(response to salt stress);GO:0009…	NA	NA	NA	11.64	12.48	12.91	5.16	5.82	5.82	15.86	15.22	13.48	10.03	9.79	9.27	61.76	57.66	57.74	1.02079e-250	4.8593e-249
Bv8_184480_mfug	blue	538.427	PREDICTED: microtubule-associated protein 70-5 [Beta vulgaris subsp. vulgaris];hypothetical protein BVRB_8g184480 isoform A [Beta vulgaris subsp. vulgaris]	GO:0005737(cytoplasm);GO:0005874(microtubule);GO:0007010(cytoskeleton organization);GO:0008017(microtubule binding);GO:0009832(plant-type cell wall biogenesis);GO:0010051(xylem and phloem pattern formation);GO:0071555(cell wall organization);GO:0071555(cell wall organization)	NA	NA	NA	16.9	11.82	10.47	17.01	16.78	18.13	26.04	24.64	20.97	29.64	27.88	24.91	41.16	37	39	7.68071e-26	2.55512e-25
Bv3_063500_iuee	blue	538.091	PREDICTED: cytochrome P450 94A1 [Beta vulgaris subsp. vulgaris]	GO:0004497(monooxygenase activity);GO:0005506(iron ion binding);GO:0009507(chloroplast);GO:0016705(oxidoreductase activity, acting on paired donors, with incorporation or reduction of molecular oxygen);GO:0019825(oxygen binding);GO:0020037(heme binding);GO:0055114(oxidation-reduction process)	00073(Cutin, suberine and wax biosynthesis)	K13407	EC:1.14.-.-	0	0	0	0	0	0	0.34	0.1	0.32	0.25	1.04	0.36	4.48	5.5	4.99	7.95035e-31	3.04769e-30
Bv2_024730_yefo	blue	536.72	hypothetical protein BVRB_2g024730 [Beta vulgaris subsp. vulgaris]	NA	NA	NA	NA	134.01	156	134.06	114.67	118.66	97.53	196.96	203.65	165.32	238.61	234.47	199.36	315.06	296.18	292.4	3.49884e-12	6.80261e-12
Bv9_215170_hrhs	blue	536.595	PREDICTED: uncharacterized protein LOC104904034 [Beta vulgaris subsp. vulgaris]	GO:0003674(molecular_function);GO:0008150(biological_process)	NA	NA	NA	4.37	4.27	5.86	10.58	11.38	10.44	19.87	17.49	20.28	23.06	23.78	20.78	39.4	29.42	34.76	1.89878e-75	1.77766e-74
Bv6_143470_fjdj	blue	536.437	PREDICTED: serine carboxypeptidase-like 50 [Beta vulgaris subsp. vulgaris]	GO:0004185(serine-type carboxypeptidase activity);GO:0051603(proteolysis involved in cellular protein catabolic process)	NA	NA	NA	22.97	27.09	23.69	20.12	18.69	19.35	26.06	23.02	23.92	40.97	42.32	43.32	63.52	64.26	68.42	2.96604e-134	5.73265e-133
Bv6_153540_qoyx	blue	535.6	PREDICTED: NAC transcription factor 29 [Beta vulgaris subsp. vulgaris]	GO:0003677(DNA binding);GO:0003700(DNA binding transcription factor activity);GO:0005634(nucleus);GO:0006351(transcription, DNA-templated);GO:0006355(regulation of transcription, DNA-templated);GO:0007275(multicellular organism development);GO:0009793(embryo development ending in seed dormancy);GO:0009825(multidimensional cell growth);GO:0009835(fruit ripening);GO:0009908(flower development);GO:0…	NA	NA	NA	0.31	0.38	0.75	4.88	5.23	4.59	4.46	6.05	4.85	4.06	5.3	5.53	63.85	56.01	60.14	0	0
Bv9_222980_gskt	blue	535.596	PREDICTED: uncharacterized protein LOC104904869 [Beta vulgaris subsp. vulgaris]	NA	NA	NA	NA	12.41	15.07	11.6	10.32	12.95	11.85	13.99	16.21	12.94	14.49	14.1	12.93	27.29	26.5	25.78	7.54532e-18	1.90155e-17
Bv1_015660_nghm	blue	535.37	PREDICTED: low-temperature-induced cysteine proteinase [Beta vulgaris subsp. vulgaris]	GO:0004197(cysteine-type endopeptidase activity);GO:0005615(extracellular space);GO:0005764(lysosome);GO:0051603(proteolysis involved in cellular protein catabolic process)	04145(Phagosome)	K01365	EC:3.4.22.15	6.03	6.78	6.79	16.85	17.24	15.33	65.47	70.42	68.18	45.25	46.22	45.72	109.74	97.19	106.08	0	0
Bv1_007890_ydym	blue	535.093	PREDICTED: uncharacterized protein LOC104891366 [Beta vulgaris subsp. vulgaris]	GO:0005515(protein binding);GO:0005634(nucleus);GO:0005737(cytoplasm);GO:0006457(protein folding)	NA	NA	NA	2.32	2.56	2.29	2.37	2.27	2.19	3.12	2.63	2.68	3.78	4.27	3.86	5.66	5.12	5.22	1.83128e-31	7.16193e-31
Bv7_170900_cfsu	blue	534.952	PREDICTED: uncharacterized protein LOC104899838 [Beta vulgaris subsp. vulgaris]	GO:0003674(molecular_function);GO:0008150(biological_process);GO:0009507(chloroplast);GO:0009535(chloroplast thylakoid membrane)	NA	NA	NA	92.94	105.42	86.36	160.58	157.34	140.6	249.11	267.93	227.58	242.59	248.4	235.5	368.16	338.22	356.3	9.24026e-93	1.09749e-91
Bv7_178360_wgnf	blue	534.926	hypothetical protein BVRB_7g178360 [Beta vulgaris subsp. vulgaris]	NA	NA	NA	NA	3.41	4.21	4.05	0	0.13	0.16	4.38	2.83	5.49	5.97	5.09	7.42	16.15	21.06	21.53	1.16432e-72	1.03614e-71
Bv2_033130_kiet	blue	534.758	PREDICTED: vacuolar-processing enzyme [Beta vulgaris subsp. vulgaris]	GO:0004197(cysteine-type endopeptidase activity);GO:0006624(vacuolar protein processing);GO:0051603(proteolysis involved in cellular protein catabolic process)	NA	NA	NA	4.85	4.94	4.95	6.71	5.95	7.45	10.26	11.14	10.65	14.26	12.74	14.4	284.91	264.83	282.91	0	0
Bv9_214070_oggu	blue	534.712	PREDICTED: probable receptor-like protein kinase At5g18500 isoform X2 [Beta vulgaris subsp. vulgaris];PREDICTED: probable receptor-like protein kinase At5g18500 isoform X1 [Beta vulgaris subsp. vulgaris]	GO:0005524(ATP binding);GO:0005886(plasma membrane);GO:0016301(kinase activity);GO:0016787(hydrolase activity);GO:0016787(hydrolase activity)	NA	NA	NA	35.19	36.15	38.79	18.4	16.74	17.39	55.29	53.83	52.28	43.35	41.34	39.28	93.65	82.35	90.52	1.01334e-148	2.25669e-147
Bv6_147050_qiou	blue	534.413	PREDICTED: protein-tyrosine-phosphatase MKP1 [Beta vulgaris subsp. vulgaris]	GO:0000188(inactivation of MAPK activity);GO:0004725(protein tyrosine phosphatase activity);GO:0005634(nucleus);GO:0005829(cytosol);GO:0006470(protein dephosphorylation);GO:0006952(defense response);GO:0009651(response to salt stress);GO:0010224(response to UV-B);GO:0010225(response to UV-C);GO:0017017(MAP kinase tyrosine/serine/threonine phosphatase activity)	NA	NA	NA	122.44	140.79	143.79	118.34	119.84	131.01	116.04	114.92	106.61	101.18	104.99	102.79	62.86	61.1	63.2	4.03958e-32	1.60779e-31
Bv5_122100_ygdi	blue	534.34	PREDICTED: probable WRKY transcription factor 23 [Beta vulgaris subsp. vulgaris]	GO:0003677(DNA binding);GO:0003700(DNA binding transcription factor activity);GO:0005634(nucleus);GO:0006351(transcription, DNA-templated);GO:0006355(regulation of transcription, DNA-templated);GO:0009617(response to bacterium);GO:0010200(response to chitin);GO:0042742(defense response to bacterium);GO:0043565(sequence-specific DNA binding);GO:0045893(positive regulation of transcription, DNA-tem…	NA	NA	NA	1.72	1.84	1.48	3.03	3.81	3.25	4.22	4.43	4.48	9.25	9.52	7.37	15.42	13.87	13.29	2.09318e-96	2.59578e-95
Bv_012960_tscq	blue	533.79	PREDICTED: 2-hydroxyisoflavanone dehydratase [Beta vulgaris subsp. vulgaris]	GO:0009717(isoflavonoid biosynthetic process);GO:0033987(2-hydroxyisoflavanone dehydratase activity);GO:0046287(isoflavonoid metabolic process);GO:0052689(carboxylic ester hydrolase activity)	00943(Isoflavonoid biosynthesis)	K13258	EC:4.2.1.105	0.68	0.73	0.67	0.52	0.73	0.34	2.62	2.67	2.58	4.23	3.84	4.07	5.71	5.16	6.19	1.298e-106	1.85662e-105
Bv7_174670_gjzk	blue	533.278	PREDICTED: protein SODIUM POTASSIUM ROOT DEFECTIVE 3 [Beta vulgaris subsp. vulgaris]	GO:0005737(cytoplasm);GO:0030001(metal ion transport);GO:0046914(transition metal ion binding);GO:0046916(cellular transition metal ion homeostasis)	03013(RNA transport)	K14292	EC:2.1.1.-	10.98	10.15	9.93	10.93	13.35	13.6	43.93	40.56	36.99	36.73	35.65	35.97	56.45	55.48	61.32	1.43505e-158	3.49422e-157
Bv9_206460_xwjp	blue	532.902	hypothetical protein BVRB_9g206470 [Beta vulgaris subsp. vulgaris]	NA	NA	NA	NA	3.99	4.63	3.22	6.35	6.44	6.79	8.16	7.62	9.21	12.27	13.43	13.79	18.53	21.74	22.34	1.08823e-50	6.54902e-50
Bv2_035150_qjkr	blue	532.801	PREDICTED: uncharacterized protein LOC104886703 [Beta vulgaris subsp. vulgaris]	GO:0003674(molecular_function);GO:0005739(mitochondrion);GO:0008150(biological_process);GO:0016021(integral component of membrane)	NA	NA	NA	0.19	0.14	0.13	0.42	0.35	0.53	0.37	0.52	0.72	0.56	0.6	0.46	6.15	5.09	6.46	1.05292e-97	1.34371e-96
Bv5_103570_rjqt	blue	532.422	PREDICTED: short-chain dehydrogenase TIC 32, chloroplastic [Beta vulgaris subsp. vulgaris]	GO:0016491(oxidoreductase activity);GO:0055114(oxidation-reduction process)	NA	NA	NA	1.97	1.67	1.8	1.38	1.78	1.88	2.17	2.33	1.97	2.17	2.41	2.11	3.98	4.68	5.07	3.23679e-13	6.62e-13
Bv7_169800_iirz	blue	532.232	PREDICTED: uncharacterized protein LOC104899736 [Beta vulgaris subsp. vulgaris]	GO:0003674(molecular_function);GO:0005634(nucleus);GO:0008150(biological_process)	NA	NA	NA	41.35	47.09	41.87	47	49.38	49.55	64.85	66.22	56.63	47.33	52.97	51.91	106.05	110.64	104.48	1.0184e-73	9.27385e-73
Bv8_195400_mhad	blue	532.132	PREDICTED: GDP-mannose transporter GONST4 [Beta vulgaris subsp. vulgaris]	GO:0000139(Golgi membrane);GO:0005457(GDP-fucose transmembrane transporter activity);GO:0005794(Golgi apparatus);GO:0005886(plasma membrane);GO:0008643(carbohydrate transport);GO:0015297(antiporter activity);GO:0015780(nucleotide-sugar transmembrane transport);GO:0016020(membrane);GO:0016021(integral component of membrane);GO:0055085(transmembrane transport)	NA	NA	NA	16.63	17.77	15.15	14.02	16.15	11.85	22.2	23.55	22.5	25.18	23.25	24.88	36.62	29.06	33.65	1.48407e-23	4.58444e-23
Bv6_127910_ozcn	blue	531.989	PREDICTED: uncharacterized protein LOC104894929 [Beta vulgaris subsp. vulgaris]	GO:0005575(cellular_component);GO:0008150(biological_process);GO:0016740(transferase activity)	NA	NA	NA	7.06	8.98	7.77	6.71	5.59	6.57	8.68	9.04	6.77	7.73	9.42	7.81	16.08	16.93	17.03	5.13856e-20	1.40671e-19
Bv5_117100_douh	blue	531.543	PREDICTED: uncharacterized SDCCAG3 family protein [Beta vulgaris subsp. vulgaris]	GO:0005634(nucleus);GO:0016301(kinase activity);GO:0016310(phosphorylation)	NA	NA	NA	21.18	23.48	22.04	21.64	23.35	20.99	38.19	40.45	35.49	25.06	29.36	23.79	62.83	64.69	67.05	1.28095e-106	1.83368e-105
Bv1_008820_agmt	blue	531.53	hypothetical protein BVRB_1g008820 isoform B [Beta vulgaris subsp. vulgaris];PREDICTED: 7-deoxyloganetin glucosyltransferase [Beta vulgaris subsp. vulgaris]	GO:0009813(flavonoid biosynthetic process);GO:0043231(intracellular membrane-bounded organelle);GO:0052696(flavonoid glucuronidation);GO:0080043(quercetin 3-O-glucosyltransferase activity);GO:0080044(quercetin 7-O-glucosyltransferase activity);GO:0080044(quercetin 7-O-glucosyltransferase activity)	NA	NA	NA	0.39	0.36	0.12	0.38	0.67	0.54	1.95	2.07	2.16	1.44	1.49	1.86	3.05	3.71	3.55	3.53165e-30	1.32919e-29
Bv2_032990_jeyh	blue	531.131	PREDICTED: RNA polymerase sigma factor sigC [Beta vulgaris subsp. vulgaris]	GO:0003677(DNA binding);GO:0003700(DNA binding transcription factor activity);GO:0003899(DNA-directed 5'-3' RNA polymerase activity);GO:0006352(DNA-templated transcription, initiation);GO:0006355(regulation of transcription, DNA-templated);GO:0009507(chloroplast);GO:0016987(bacterial sigma factor activity);GO:0019685(photosynthesis, dark reaction);GO:0071482(cellular response to light stimulus);G…	NA	NA	NA	19.84	20.93	18.75	23.95	25.19	22.84	32.99	34.39	31.66	28.41	30.04	28.16	44.68	40.3	42.7	7.67555e-41	3.7933e-40
Bv1_017390_ogpc	blue	531.121	hypothetical protein BVRB_1g017390 isoform B [Beta vulgaris subsp. vulgaris];hypothetical protein BVRB_1g017390 isoform A [Beta vulgaris subsp. vulgaris]	GO:0003729(mRNA binding);GO:0003743(translation initiation factor activity);GO:0005576(extracellular region);GO:0005737(cytoplasm);GO:0006413(translational initiation);GO:0006417(regulation of translation);GO:0009615(response to virus);GO:0009737(response to abscisic acid);GO:0009737(response to abscisic acid)	03013(RNA transport);03013(RNA transport)	K03260	NA	0.54	0.44	1.41	1.12	0.77	0.63	1.17	1.64	1.47	2.78	2.3	3.59	5.24	5.11	6.17	1.60585e-22	4.80954e-22
Bv2_047440_smfy	blue	531.03	PREDICTED: dirigent protein 2 [Beta vulgaris subsp. vulgaris]	GO:0009699(phenylpropanoid biosynthetic process);GO:0042349(guiding stereospecific synthesis activity)	00970(Aminoacyl-tRNA biosynthesis)	K01870	EC:6.1.1.5	1.37	1.05	1.63	0.58	1.04	0.78	1.14	1.63	1.49	2.89	2.62	3.22	5.59	4.79	5	1.54852e-27	5.41156e-27
Bv_013020_uwhf	blue	530.905	PREDICTED: uncharacterized protein LOC104884902 [Beta vulgaris subsp. vulgaris]	GO:0005634(nucleus);GO:0005884(actin filament);GO:0009055(electron transfer activity);GO:0009902(chloroplast relocation);GO:0015035(protein disulfide oxidoreductase activity);GO:0045454(cell redox homeostasis);GO:0051017(actin filament bundle assembly)	NA	NA	NA	25.76	26.44	24.56	40.78	39.72	39.06	38.26	37.66	40.37	42.94	44.15	44.97	73.79	75.39	76.27	4.74171e-88	5.31603e-87
Bv8_198140_dhpx	blue	530.844	PREDICTED: uncharacterized oxidoreductase At4g09670 [Beta vulgaris subsp. vulgaris]	GO:0016491(oxidoreductase activity);GO:0055114(oxidation-reduction process)	NA	NA	NA	14.92	17.93	16.34	7.88	8.25	6.92	19.31	17.8	18.51	14.64	14.96	13.23	44.72	38.28	43.29	2.40747e-86	2.62704e-85
Bv8_192840_jnth	blue	530.675	hypothetical protein BVRB_8g192840 [Beta vulgaris subsp. vulgaris]	NA	NA	NA	NA	2.95	3.67	3.21	0.43	0.11	0	2.57	3.06	2.27	2.34	3.25	1.81	12.98	12.16	13.06	3.75435e-67	3.02534e-66
Bv9_215410_zoog	blue	530.59	PREDICTED: ABC transporter G family member 11-like [Beta vulgaris subsp. vulgaris]	GO:0005886(plasma membrane);GO:0016021(integral component of membrane);GO:0042626(ATPase activity, coupled to transmembrane movement of substances)	02010(ABC transporters)	K05681	NA	0	0	0	0.36	0	0	0	0	0	1.05	1.74	0.73	3.92	4.11	4.9	8.06636e-20	2.19154e-19
Bv1_008500_eeun	blue	530.394	PREDICTED: uncharacterized protein At1g04910 [Beta vulgaris subsp. vulgaris]	GO:0005737(cytoplasm)	NA	NA	NA	0.32	0.39	0.35	0.71	0.67	0.6	1.17	0.87	0.81	1.35	2.02	1.59	2.92	2.38	2.84	1.52239e-30	5.78661e-30
Bv9_220030_esog	blue	530.127	PREDICTED: (6-4)DNA photolyase isoform X1 [Beta vulgaris subsp. vulgaris];PREDICTED: (6-4)DNA photolyase isoform X2 [Beta vulgaris subsp. vulgaris]	GO:0000166(nucleotide binding);GO:0003677(DNA binding);GO:0003914(DNA (6-4) photolyase activity);GO:0005634(nucleus);GO:0006281(DNA repair);GO:0009411(response to UV);GO:0009507(chloroplast);GO:0009507(chloroplast)	NA	NA	NA	5.67	9.87	6.25	5.23	8.11	6.86	19.62	20.75	18.05	28.32	28.23	28.53	37.74	38.55	39.28	5.46004e-51	3.29802e-50
Bv6_155170_umck	blue	529.898	PREDICTED: UDP-glycosyltransferase 79B9 [Beta vulgaris subsp. vulgaris]	GO:0009813(flavonoid biosynthetic process);GO:0043231(intracellular membrane-bounded organelle);GO:0052696(flavonoid glucuronidation);GO:0080043(quercetin 3-O-glucosyltransferase activity);GO:0080044(quercetin 7-O-glucosyltransferase activity)	00942(Anthocyanin biosynthesis)	K17193	EC:2.4.2.51	4.54	5.58	5.46	10.22	10.57	10.93	11.6	12.42	12.1	19.83	21.97	19.32	30.8	29.25	32.19	2.24869e-129	4.11209e-128
Bv4_090170_aydt	blue	528.659	PREDICTED: two-pore potassium channel 1 [Beta vulgaris subsp. vulgaris]	GO:0009705(plant-type vacuole membrane)	NA	NA	NA	0.77	0.81	0.83	0.45	0.77	0.7	1.22	1.67	0.92	1.28	1.41	1.28	2.21	2.4	2.24	3.51377e-16	8.24553e-16
Bv5_108730_xtuk	blue	528.188	PREDICTED: uncharacterized protein LOC104893175 [Beta vulgaris subsp. vulgaris]	GO:0003674(molecular_function);GO:0005634(nucleus);GO:0008150(biological_process)	NA	NA	NA	22.57	23.32	23.46	21.56	20.38	21.01	14.1	13.24	13.61	15.6	17.64	16.86	7.98	7.62	7.71	1.58747e-97	2.01304e-96
Bv9_225370_znnz	blue	528.113	PREDICTED: histone H2B.2 [Beta vulgaris subsp. vulgaris]	GO:0000788(nuclear nucleosome);GO:0003677(DNA binding);GO:0006334(nucleosome assembly)	NA	NA	NA	0	0.24	0	0.43	0	0	0	0.07	0.27	0.52	0.53	0.74	2.32	2.44	2.91	8.4778e-05	0.000108414
Bv1_022660_angp	blue	527.902	PREDICTED: uncharacterized protein LOC104905848 [Beta vulgaris subsp. vulgaris]	GO:0005634(nucleus);GO:0005768(endosome);GO:0005794(Golgi apparatus);GO:0005802(trans-Golgi network);GO:0006004(fucose metabolic process);GO:0006486(protein glycosylation);GO:0016021(integral component of membrane);GO:0016757(transferase activity, transferring glycosyl groups)	NA	NA	NA	3.71	5.08	4.18	3.91	4.52	2.64	7.01	5.21	5.82	6.93	6.44	6.02	12.6	9.12	12.43	9.16169e-17	2.20779e-16
Bv2_030400_zarw	blue	526.827	PREDICTED: jasmonate-induced protein homolog [Beta vulgaris subsp. vulgaris]	NA	NA	NA	NA	98.71	112.63	108.42	182.95	191.91	198.09	996.38	994.45	1019.2	1230.47	1199.09	1264.4	1811.8	1630.74	1762.26	8.18729e-96	1.00906e-94
Bv9_206170_reor	blue	526.543	PREDICTED: uncharacterized protein LOC104902972 [Beta vulgaris subsp. vulgaris]	GO:0005215(transporter activity);GO:0005524(ATP binding);GO:0005886(plasma membrane);GO:0006810(transport);GO:0006979(response to oxidative stress);GO:0007623(circadian rhythm);GO:0009507(chloroplast);GO:0009644(response to high light intensity);GO:0009941(chloroplast envelope);GO:0010150(leaf senescence);GO:0016021(integral component of membrane);GO:0016301(kinase activity);GO:0016310(phosphoryl…	04626(Plant-pathogen interaction)	K13457	NA	117.12	124.43	129.66	210.36	212.64	209.57	607.23	611.27	609.87	492.93	480.08	485.24	899.44	818.2	844.52	2.0789e-78	2.03635e-77
Bv2_040410_gghn	blue	526.433	PREDICTED: hypersensitive-induced response protein 1 [Beta vulgaris subsp. vulgaris]	GO:0005515(protein binding);GO:0005773(vacuole);GO:0005774(vacuolar membrane);GO:0005794(Golgi apparatus);GO:0005829(cytosol);GO:0005886(plasma membrane);GO:0009506(plasmodesma);GO:0016020(membrane);GO:0043424(protein histidine kinase binding)	NA	NA	NA	1.98	2.46	2.67	11.79	12.05	12.19	10.91	11.06	10.98	12.62	12.88	12.71	37.71	34.4	35.69	0	0
Bv7_172120_zcwd	blue	526.394	PREDICTED: uncharacterized protein LOC104899954 [Beta vulgaris subsp. vulgaris]	GO:0005375(copper ion transmembrane transporter activity);GO:0009793(embryo development ending in seed dormancy)	NA	NA	NA	18.36	21.26	20.49	16.61	16.54	17.15	36.25	35.39	37.15	31.22	26.35	30.12	47.5	48.34	49.92	9.94337e-84	1.04816e-82
Bv_012750_mrxx	blue	526.293	PREDICTED: non-specific lipid-transfer protein 2 [Beta vulgaris subsp. vulgaris]	GO:0005576(extracellular region);GO:0006869(lipid transport);GO:0008289(lipid binding)	NA	NA	NA	7.68	8.76	9.38	11	14.07	11.09	15.98	16.61	15.93	16.17	17.18	15.97	22.93	21.49	24.9	6.195e-41	3.0675e-40
Bv6_134740_guat	blue	526.284	PREDICTED: dof zinc finger protein DOF3.4 [Beta vulgaris subsp. vulgaris]	GO:0003677(DNA binding);GO:0003700(DNA binding transcription factor activity);GO:0005515(protein binding);GO:0005634(nucleus);GO:0006351(transcription, DNA-templated);GO:0009733(response to auxin);GO:0009751(response to salicylic acid);GO:0042545(cell wall modification);GO:0044212(transcription regulatory region DNA binding);GO:0045787(positive regulation of cell cycle);GO:0045893(positive regula…	NA	NA	NA	0.17	0.1	0.17	0.35	0.63	0.33	0.68	0.56	0.42	0.55	1.49	0.82	4.08	2.83	3.32	3.91034e-26	1.31347e-25
Bv7_175570_cewa	blue	525.907	PREDICTED: protein NUCLEAR FUSION DEFECTIVE 4 [Beta vulgaris subsp. vulgaris]	GO:0003674(molecular_function);GO:0008150(biological_process);GO:0009507(chloroplast);GO:0016021(integral component of membrane)	NA	NA	NA	2.38	5.04	3.73	1.3	0.43	0.99	2.94	3.66	2.44	3.75	3.94	3.71	34.27	31.39	27.79	3.71353e-91	4.325e-90
Bv8_201330_smun	blue	525.329	PREDICTED: uncharacterized protein LOC104882998 [Beta vulgaris subsp. vulgaris]	GO:0003674(molecular_function);GO:0008150(biological_process)	NA	NA	NA	0.18	0	0.29	0.45	0.69	0.56	1.36	1.22	1.03	8.25	8.16	6.91	335.24	321.63	320.34	0	0
Bv1_018900_ikat	blue	524.957	PREDICTED: uncharacterized protein LOC104905380 isoform X2 [Beta vulgaris subsp. vulgaris];PREDICTED: uncharacterized protein LOC104905380 isoform X1 [Beta vulgaris subsp. vulgaris]	GO:0005634(nucleus);GO:0005739(mitochondrion);GO:0009507(chloroplast);GO:0016491(oxidoreductase activity);GO:0016657(oxidoreductase activity, acting on NAD(P)H, nitrogenous group as acceptor);GO:0016657(oxidoreductase activity, acting on NAD(P)H, nitrogenous group as acceptor)	NA	NA	NA	6.27	8.23	6.83	7.46	6.81	7.38	12.71	12.88	12.58	15.64	16.25	14.38	20.13	18.22	19.44	2.72458e-50	1.63148e-49
Bv7_175360_fgfu	blue	522.932	PREDICTED: uncharacterized protein At5g39865 [Beta vulgaris subsp. vulgaris]	GO:0005634(nucleus);GO:0009055(electron transfer activity);GO:0015035(protein disulfide oxidoreductase activity);GO:0045454(cell redox homeostasis)	NA	NA	NA	8.36	8.42	8.93	6.51	5.47	6.64	10.29	10.33	7.47	8.89	9.57	7.19	20.31	22.41	24.37	7.00219e-28	2.47539e-27
Bv5_107910_taqs	blue	522.565	PREDICTED: uncharacterized protein LOC104893104 [Beta vulgaris subsp. vulgaris]	GO:0005634(nucleus);GO:0006974(cellular response to DNA damage stimulus);GO:0007050(cell cycle arrest);GO:0046983(protein dimerization activity)	NA	NA	NA	0.57	0.66	0.83	0.51	0.8	0.47	0.72	0.66	0.6	0.88	0.67	0.83	2.32	2.13	2.09	1.65197e-19	4.43665e-19
Bv2_026160_ayrg	blue	522.329	hypothetical protein BVRB_2g026160 [Beta vulgaris subsp. vulgaris]	GO:0003674(molecular_function);GO:0005739(mitochondrion);GO:0008150(biological_process)	NA	NA	NA	6.68	6.89	7.08	12.85	11.64	9.53	18.38	16.97	16.83	13.96	14.23	13.47	26.27	30	28.8	1.52722e-78	1.49678e-77
Bv7_159520_mznz	blue	521.804	hypothetical protein BVRB_7g159520 [Beta vulgaris subsp. vulgaris]	GO:0003674(molecular_function);GO:0005634(nucleus);GO:0080167(response to karrikin)	NA	NA	NA	2.28	1.85	1.25	3.62	4.12	3.02	6.59	8.73	6.39	5.67	7.67	5.94	12.87	17.81	16.94	3.34102e-46	1.83792e-45
Bv9_221940_cjwp	blue	521.796	hypothetical protein BVRB_9g221940 [Beta vulgaris subsp. vulgaris]	GO:0005829(cytosol);GO:0008233(peptidase activity);GO:0019760(glucosinolate metabolic process)	NA	NA	NA	63.19	71.85	69.82	94.93	102.76	93.24	87.29	91.95	84.6	164.17	162.08	154.79	259.72	240	261.56	1.8335e-152	4.19211e-151
Bv4_087720_eajr	blue	521.488	PREDICTED: defensin-like protein AX1 [Beta vulgaris subsp. vulgaris]	NA	NA	NA	NA	2.98	3.21	2.7	100.43	100.16	97.44	44.96	47.41	44.31	155.35	166.63	159.83	503.21	544.79	515.86	0	0
Bv7_180670_dyex	blue	520.973	PREDICTED: probable leucine-rich repeat receptor-like protein kinase At1g35710 isoform X1 [Beta vulgaris subsp. vulgaris]	GO:0004674(protein serine/threonine kinase activity);GO:0005515(protein binding);GO:0005524(ATP binding);GO:0005634(nucleus);GO:0005886(plasma membrane);GO:0006468(protein phosphorylation);GO:0009506(plasmodesma);GO:0009755(hormone-mediated signaling pathway);GO:0010183(pollen tube guidance);GO:0016020(membrane);GO:0016021(integral component of membrane);GO:0016301(kinase activity);GO:0090406(pol…	NA	NA	NA	18.9	22.86	18.4	10.54	9.34	10.54	29.3	32.08	30.73	19.75	19.39	17.31	64.45	57.8	59	6.09168e-111	9.12687e-110
Bv5_104000_paec	blue	520.65	PREDICTED: cytochrome P450 78A3 [Beta vulgaris subsp. vulgaris]	GO:0016020(membrane);GO:0016709(oxidoreductase activity, acting on paired donors, with incorporation or reduction of molecular oxygen, NAD(P)H as one donor, and incorporation of one atom of oxygen);GO:0044550(secondary metabolite biosynthetic process)	NA	NA	NA	0.35	0.5	0.24	0	0.07	0	0.49	0.38	0.4	0.48	0.24	0.22	2.16	2.36	2.85	1.46733e-21	4.25382e-21
Bv_015070_caur	blue	520.595	hypothetical protein BVRB_015070, partial [Beta vulgaris subsp. vulgaris]	GO:0006817(phosphate ion transport);GO:0009705(plant-type vacuole membrane);GO:0016021(integral component of membrane);GO:0055085(transmembrane transport);GO:1905011(transmembrane phosphate ion transport from cytosol to vacuole)	NA	NA	NA	0.15	0	0	0	0.06	0.3	0.87	0.72	0.45	0.92	0.89	0.53	1.34	1.56	1.61	5.63125e-07	8.27443e-07
Bv6_139320_hfyd	blue	520.485	PREDICTED: stress enhanced protein 2, chloroplastic [Beta vulgaris subsp. vulgaris]	GO:0009507(chloroplast);GO:0009523(photosystem II);GO:0009535(chloroplast thylakoid membrane);GO:0009611(response to wounding);GO:0009765(photosynthesis, light harvesting);GO:0016021(integral component of membrane);GO:0016168(chlorophyll binding);GO:0071486(cellular response to high light intensity);GO:0071492(cellular response to UV-A)	NA	NA	NA	10.55	10.36	10.23	21.14	22.53	22.21	52.9	55.55	49.16	60.93	57.39	55.98	83.85	74.3	85.17	0	0
Bv2_043420_qkgm	blue	520.41	PREDICTED: pleiotropic drug resistance protein TUR2 [Beta vulgaris subsp. vulgaris]	GO:0005886(plasma membrane);GO:0016021(integral component of membrane);GO:0042626(ATPase activity, coupled to transmembrane movement of substances)	02010(ABC transporters)	K05681	NA	12.4	14.8	13.97	8.12	8.59	7.95	11.49	12.26	11.54	16.48	17.95	17.26	29.11	25.87	29.05	6.36832e-97	7.96882e-96
Bv5_099100_cywa	blue	520.308	PREDICTED: uncharacterized protein LOC104892176 [Beta vulgaris subsp. vulgaris]	NA	NA	NA	NA	35.7	37.33	42.51	193.19	192.24	188.68	608.28	582.22	598.92	1421.94	1464.19	1425.54	2125.79	1978.29	2301.58	1.18601e-145	2.55581e-144
Bv7_167180_snhs	blue	519.522	PREDICTED: probable pectate lyase 4 [Beta vulgaris subsp. vulgaris]	GO:0005886(plasma membrane);GO:0016829(lyase activity);GO:0030570(pectate lyase activity)	00040(Pentose and glucuronate interconversions)	K01728	EC:4.2.2.2	30.27	35.93	32.34	40.33	43.3	44.22	71.22	66.82	68.14	60.26	64.09	57.95	92.31	84.73	87.92	8.77855e-77	8.37991e-76
Bv1_004330_arou	blue	519.025	PREDICTED: syntaxin-71 isoform X2 [Beta vulgaris subsp. vulgaris]	GO:0000149(SNARE binding);GO:0005484(SNAP receptor activity);GO:0006886(intracellular protein transport);GO:0006906(vesicle fusion);GO:0012505(endomembrane system);GO:0016021(integral component of membrane);GO:0031201(SNARE complex);GO:0048278(vesicle docking)	04130(SNARE interactions in vesicular transport)	K08506	NA	0.2	0.2	0.15	0.58	0.56	0.87	2.87	3.04	2.34	5.04	4.62	5.07	7.35	6.3	7.04	2.10581e-184	6.2118e-183
Bv9_224210_jezc	blue	518.28	PREDICTED: cysteine proteinase RD21A [Beta vulgaris subsp. vulgaris]	GO:0004197(cysteine-type endopeptidase activity);GO:0005615(extracellular space);GO:0005764(lysosome);GO:0051603(proteolysis involved in cellular protein catabolic process)	04145(Phagosome)	K01365	EC:3.4.22.15	464.72	534.79	546.8	433.98	455.26	469.71	1110.08	1100.58	1146.17	832.9	821.13	844.54	1485.89	1443.84	1588.65	8.94844e-26	2.97136e-25
Bv2_044600_drzk	blue	518.151	PREDICTED: dehydration-responsive element-binding protein 2C-like isoform X3 [Beta vulgaris subsp. vulgaris]	GO:0003700(DNA binding transcription factor activity);GO:0005634(nucleus);GO:0043565(sequence-specific DNA binding);GO:0044212(transcription regulatory region DNA binding);GO:0045893(positive regulation of transcription, DNA-templated)	NA	NA	NA	17.79	20.02	20.43	26.95	28.17	26.03	31.03	28.02	27.52	39.52	43.81	42.53	57.99	58.68	57.1	4.25541e-78	4.13902e-77
Bv7_161270_zkkk	blue	516.889	PREDICTED: purine-uracil permease NCS1 [Beta vulgaris subsp. vulgaris]	GO:0005886(plasma membrane);GO:0015205(nucleobase transmembrane transporter activity);GO:0015851(nucleobase transport)	NA	NA	NA	5.87	6.08	7.03	6.57	6.13	6.44	13.24	15.14	14.71	15.65	13.65	14.98	21.4	17.59	22.61	1.12178e-56	7.55156e-56
Bv6_145950_oido	blue	516.729	hypothetical protein BVRB_6g145950 [Beta vulgaris subsp. vulgaris]	NA	NA	NA	NA	3.31	3.94	3.19	4.24	4.25	3.97	5.04	4.03	4.66	6.16	6.25	5.42	7.86	7.68	7.96	4.44281e-18	1.13091e-17
Bv5_104730_xsdz	blue	516.61	PREDICTED: homeobox-leucine zipper protein HAT4 isoform X3 [Beta vulgaris subsp. vulgaris]	GO:0003677(DNA binding);GO:0003700(DNA binding transcription factor activity);GO:0005515(protein binding);GO:0005634(nucleus);GO:0006351(transcription, DNA-templated);GO:0006355(regulation of transcription, DNA-templated);GO:0008283(cell proliferation);GO:0009585(red, far-red light phototransduction);GO:0009641(shade avoidance);GO:0009733(response to auxin);GO:0009735(response to cytokinin);GO:00…	NA	NA	NA	21.62	22.32	24.14	13.39	14.58	13.26	23.62	24.9	26.81	15.87	17.62	18.38	76.72	71.53	79.92	2.05116e-224	7.93731e-223
Bv2_033500_xhhk	blue	516.533	PREDICTED: plasma membrane ATPase 4 isoform X1 [Beta vulgaris subsp. vulgaris]	GO:0005887(integral component of plasma membrane);GO:0008553(proton-exporting ATPase activity, phosphorylative mechanism);GO:0043231(intracellular membrane-bounded organelle);GO:0051453(regulation of intracellular pH);GO:1902600(proton transmembrane transport)	00190(Oxidative phosphorylation)	K01535	EC:3.6.3.6	43.13	49.63	52.33	63.53	63.36	64.01	83.44	83.27	80.84	91.13	93.79	94.59	121.06	108.57	115.2	1.34538e-15	3.06285e-15
Bv6_154420_jjfn	blue	515.903	hypothetical protein BVRB_6g154420 [Beta vulgaris subsp. vulgaris]	NA	NA	NA	NA	0	0.14	0.07	0	0.11	0.07	0	0.06	0.14	0.34	0.46	0.12	11.1	11.1	9.99	7.59152e-103	1.03643e-101
Bv8_181510_spap	blue	515.687	hypothetical protein BVRB_8g181510 isoform A [Beta vulgaris subsp. vulgaris];hypothetical protein BVRB_8g181510 isoform B [Beta vulgaris subsp. vulgaris];hypothetical protein BVRB_8g181510 isoform C [Beta vulgaris subsp. vulgaris]	NA	NA	NA	NA	0.95	0.74	1.42	3.92	5.27	4.99	9.43	11.82	11.71	8.97	10.31	9.52	18.2	15.77	17.71	2.09148e-87	2.31594e-86
Bv8_193160_xqcs	blue	515.563	PREDICTED: uncharacterized protein LOC104901922 isoform X2 [Beta vulgaris subsp. vulgaris];PREDICTED: uncharacterized protein LOC104901922 isoform X1 [Beta vulgaris subsp. vulgaris]	GO:0005634(nucleus);GO:0005634(nucleus)	NA	NA	NA	16.04	16.61	21.01	19.46	21.03	23	31.15	30.98	33.41	33.49	34.22	33.01	42.99	39.77	46.13	4.82618e-26	1.61747e-25
Bv5_108320_uwng	blue	515.279	PREDICTED: trihelix transcription factor GT-3b [Beta vulgaris subsp. vulgaris]	GO:0003700(DNA binding transcription factor activity);GO:0005515(protein binding);GO:0005634(nucleus);GO:0006351(transcription, DNA-templated);GO:0006355(regulation of transcription, DNA-templated);GO:0042802(identical protein binding);GO:0043565(sequence-specific DNA binding)	NA	NA	NA	0.77	1.19	1.33	0.74	0.92	0.91	0.93	0.86	1.07	1.57	1.29	1.45	2.99	2.55	2.86	2.12706e-19	5.6888e-19
Bv7_160890_ywat	blue	514.925	PREDICTED: auxin-binding protein ABP19a [Beta vulgaris subsp. vulgaris]	GO:0005618(cell wall);GO:0033609(oxalate metabolic process);GO:0046564(oxalate decarboxylase activity)	NA	NA	NA	0.2	0.11	0.29	10.83	11.54	11.82	2.94	2.25	1.8	13.43	14.46	13.33	315.93	282.01	275.06	0	0
Bv8_197970_cpyp	blue	514.697	PREDICTED: zinc finger CCCH domain-containing protein 20 [Beta vulgaris subsp. vulgaris]	GO:0003676(nucleic acid binding);GO:0003677(DNA binding);GO:0003700(DNA binding transcription factor activity);GO:0005634(nucleus);GO:0005886(plasma membrane);GO:0006355(regulation of transcription, DNA-templated);GO:0006979(response to oxidative stress);GO:0046872(metal ion binding)	NA	NA	NA	12.96	16.77	17.53	57.21	67.39	66.1	52.06	41.07	42.95	60.1	54.58	57.2	279.34	249.5	269.06	2.71802e-268	1.44272e-266
Bv2_035810_fdtk	blue	514.51	hypothetical protein BVRB_2g035810 [Beta vulgaris subsp. vulgaris]	NA	NA	NA	NA	0.37	0.27	0.46	0.35	0.2	0.41	0.33	0.72	0.27	0.78	0.67	0.69	16.48	13.02	13.44	6.2238e-166	1.60907e-164
Bv5_121660_eqrz	blue	514.309	hypothetical protein BVRB_5g121660 [Beta vulgaris subsp. vulgaris]	NA	NA	NA	NA	28.88	30.59	29.03	11.05	11.99	8.68	22.77	23.46	21.53	38.94	42.89	37.97	71.95	76.07	77.69	9.47737e-149	2.11321e-147
Bv7_170910_tctt	blue	514.153	PREDICTED: transcription factor E2FB [Beta vulgaris subsp. vulgaris]	GO:0003677(DNA binding);GO:0003700(DNA binding transcription factor activity);GO:0005515(protein binding);GO:0005634(nucleus);GO:0005667(transcription factor complex);GO:0005737(cytoplasm);GO:0006351(transcription, DNA-templated);GO:0006355(regulation of transcription, DNA-templated);GO:0007049(cell cycle);GO:0008284(positive regulation of cell proliferation);GO:0009733(response to auxin);GO:0010…	NA	NA	NA	11.15	9.98	9.42	12.38	11.88	12.61	12.01	12.34	13.62	16.86	15.49	15.4	20.92	21.11	21.02	2.15456e-18	5.55113e-18
Bv5_108030_apug	blue	512.8	hypothetical protein BVRB_5g108030 [Beta vulgaris subsp. vulgaris]	NA	NA	NA	NA	0.17	0	0.18	0.09	0	0	0	0.07	0	0.13	0.22	0.19	133.54	136.93	147.71	0	0
Bv2_036390_yaop	blue	512.75	PREDICTED: glycine-rich cell wall structural protein 1-like [Beta vulgaris subsp. vulgaris]	NA	NA	NA	NA	183.43	213.61	190.92	183.18	193.38	184.24	120.01	106.19	113.99	73.71	78.21	77.9	23.1	25.55	25.53	1.28516e-225	5.03818e-224
Bv1_008800_xyuj	blue	512.686	PREDICTED: 7-deoxyloganetin glucosyltransferase [Beta vulgaris subsp. vulgaris]	GO:0009813(flavonoid biosynthetic process);GO:0043231(intracellular membrane-bounded organelle);GO:0052696(flavonoid glucuronidation);GO:0080043(quercetin 3-O-glucosyltransferase activity);GO:0080044(quercetin 7-O-glucosyltransferase activity)	NA	NA	NA	0.07	0.1	0	0.59	0.49	0.79	0.2	0.19	0.11	0.53	0.51	0.82	7.24	6.85	6.97	7.6276e-142	1.58855e-140
Bv7_175860_rdtw	blue	511.996	PREDICTED: peroxidase 57 [Beta vulgaris subsp. vulgaris]	GO:0004601(peroxidase activity);GO:0009505(plant-type cell wall);GO:0009664(plant-type cell wall organization)	00940(Phenylpropanoid biosynthesis)	K00430	EC:1.11.1.7	11.59	12.14	11.49	6.6	5.57	6.03	10.65	10.65	8.97	22.14	19.59	21.37	34.41	37.34	35.4	5.19969e-114	8.12181e-113
Bv7_167080_zuwg	blue	511.624	PREDICTED: keratin, type I cytoskeletal 9 [Beta vulgaris subsp. vulgaris]	GO:0003729(mRNA binding);GO:0005829(cytosol)	03013(RNA transport);03008(Ribosome biogenesis in eukaryotes)	K14525	EC:3.1.26.5	25.58	30.87	24.78	25.86	23.39	25.46	25.58	25.29	23.36	31.62	32.73	28.61	59.96	54.58	67.52	1.13342e-52	7.08646e-52
Bv7_171540_trqg	blue	511.6	PREDICTED: structural maintenance of chromosomes protein 3 isoform X1 [Beta vulgaris subsp. vulgaris]	GO:0000775(chromosome, centromeric region);GO:0000785(chromatin);GO:0003682(chromatin binding);GO:0005524(ATP binding);GO:0005634(nucleus);GO:0005737(cytoplasm);GO:0005819(spindle);GO:0006281(DNA repair);GO:0007059(chromosome segregation);GO:0007062(sister chromatid cohesion);GO:0008278(cohesin complex);GO:0009506(plasmodesma);GO:0016363(nuclear matrix);GO:0051301(cell division);GO:0051321(meioti…	NA	NA	NA	92.36	101.81	101.57	110.15	122.81	118.22	118.95	123.75	114.04	155.96	160.76	159.68	202.99	194.66	216.5	2.56932e-37	1.16191e-36
Bv2_047650_jrpi	blue	511.557	PREDICTED: auxin response factor 18 isoform X1 [Beta vulgaris subsp. vulgaris]	GO:0003677(DNA binding);GO:0003700(DNA binding transcription factor activity);GO:0005634(nucleus);GO:0006351(transcription, DNA-templated);GO:0006355(regulation of transcription, DNA-templated);GO:0007389(pattern specification process);GO:0009734(auxin-activated signaling pathway);GO:0009738(abscisic acid-activated signaling pathway);GO:0009743(response to carbohydrate);GO:0010154(fruit developme…	04075(Plant hormone signal transduction)	K14486	NA	5	5.69	5.29	3.95	5.57	4.54	9.09	6.58	6.14	8.58	8.67	8.37	11.57	11.47	11.87	6.32177e-15	1.39884e-14
Bv9_205740_xppn	blue	511.455	PREDICTED: uncharacterized protein LOC104902902 [Beta vulgaris subsp. vulgaris]	GO:0005886(plasma membrane);GO:0016021(integral component of membrane)	NA	NA	NA	37.21	55.56	47.05	13.54	15.52	12.62	63.85	57.19	60.18	66.91	64.78	58.32	117.4	117.79	104.16	4.32067e-84	4.56793e-83
Bv4_075570_aitz	blue	511.362	PREDICTED: wall-associated receptor kinase-like 1 [Beta vulgaris subsp. vulgaris]	GO:0004674(protein serine/threonine kinase activity);GO:0005886(plasma membrane);GO:0007166(cell surface receptor signaling pathway)	NA	NA	NA	0.82	0.65	0.99	1.33	1.5	1.33	1.69	1.76	1.84	1.72	1.45	1.54	3.21	2.67	2.93	8.57185e-19	2.24058e-18
Bv1_022170_nqfi	blue	511.255	PREDICTED: uncharacterized acetyltransferase At3g50280-like [Beta vulgaris subsp. vulgaris]	GO:0005737(cytoplasm);GO:0005829(cytosol);GO:0016740(transferase activity);GO:0016747(transferase activity, transferring acyl groups other than amino-acyl groups)	NA	NA	NA	31.69	36.76	38.99	39.36	38.88	42.28	57.84	57.51	60.87	58.41	56.31	58.19	79.25	66.28	76.62	8.07927e-38	3.70014e-37
Bv3_056330_aduh	blue	511.18	PREDICTED: short-chain type dehydrogenase/reductase [Beta vulgaris subsp. vulgaris]	GO:0009507(chloroplast);GO:0016491(oxidoreductase activity);GO:0055114(oxidation-reduction process)	00061(Fatty acid biosynthesis);01040(Biosynthesis of unsaturated fatty acids);00780(Biotin metabolism);00333(Prodigiosin biosyntheses)	K00059	EC:1.1.1.100	3.82	5.85	5.9	9.55	8.11	11.18	9.02	10.15	9.34	9.85	9.76	10.16	21.94	20.45	21.69	6.93723e-42	3.51927e-41
Bv6_153740_tcnp	blue	511.112	hypothetical protein BVRB_6g153740 [Beta vulgaris subsp. vulgaris]	NA	NA	NA	NA	9.72	10.55	11.53	14.52	15.02	16.61	36.08	38.32	37.54	41.85	45.64	43.42	57.28	54.4	60.08	1.35824e-225	5.31307e-224
Bv1_006330_dnji	blue	510.954	PREDICTED: cysteine protease RD19A [Beta vulgaris subsp. vulgaris]	GO:0004197(cysteine-type endopeptidase activity);GO:0005615(extracellular space);GO:0005764(lysosome);GO:0051603(proteolysis involved in cellular protein catabolic process)	NA	NA	NA	87.51	91.7	101.55	112.22	111.36	116.35	260.87	256.11	268.7	244.1	242.33	246.06	352.58	324.72	349.71	1.3304e-32	5.35195e-32
Bv2_046480_yeyr	blue	510.181	PREDICTED: ureide permease 2 [Beta vulgaris subsp. vulgaris]	GO:0005274(allantoin:proton symporter activity);GO:0005524(ATP binding);GO:0005886(plasma membrane);GO:0015210(uracil transmembrane transporter activity);GO:0015505(uracil:cation symporter activity);GO:0015720(allantoin transport);GO:0015857(uracil transport);GO:0016021(integral component of membrane);GO:0022857(transmembrane transporter activity);GO:0043100(pyrimidine nucleobase salvage);GO:0071…	NA	NA	NA	1.22	2.27	0.92	147.16	148.07	140.52	300.8	298.24	290.68	333.21	317.65	311.3	557.85	481.88	491.86	0	0
Bv2_027260_didh	blue	510.074	hypothetical protein BVRB_2g027260 [Beta vulgaris subsp. vulgaris]	GO:0005576(extracellular region);GO:0006869(lipid transport);GO:0008289(lipid binding)	NA	NA	NA	65.04	69.6	77.15	59.02	59.99	60.31	161.04	159.94	160.58	185.88	188.3	191.48	250.34	221.35	254.24	5.24013e-77	5.01815e-76
Bv5_118410_dzkm	blue	510	PREDICTED: uncharacterized protein LOC104894421 isoform X2 [Beta vulgaris subsp. vulgaris]	GO:0003674(molecular_function);GO:0005575(cellular_component);GO:0080167(response to karrikin)	NA	NA	NA	17.12	19.44	22.23	8.79	8.41	7.68	21.15	21.4	23.24	25.52	25.78	27.09	45.9	37.99	41.49	4.47873e-73	4.0275e-72
Bv5_122630_gagm	blue	509.515	PREDICTED: meiosis arrest female protein 1 isoform X2 [Beta vulgaris subsp. vulgaris];PREDICTED: uncharacterized protein LOC104894835 isoform X1 [Beta vulgaris subsp. vulgaris]	GO:0004519(endonuclease activity);GO:0005634(nucleus);GO:0005777(peroxisome);GO:0010468(regulation of gene expression);GO:0010468(regulation of gene expression)	NA	NA	NA	31.95	37.11	36.29	39.66	40.18	38.83	32.64	33.56	30.32	36.69	35.7	33.4	15.65	14.38	15.48	1.76446e-51	1.07663e-50
Bv9_207210_pjen	blue	509.238	hypothetical protein BVRB_9g207210 [Beta vulgaris subsp. vulgaris]	NA	NA	NA	NA	0.35	0.21	0.24	0.69	0.83	0.43	1.41	1.56	2.03	3.25	2.57	2.96	4.41	3.72	4.54	4.587e-30	1.72314e-29
Bv3_049410_qzxk	blue	508.067	PREDICTED: 1-aminocyclopropane-1-carboxylate oxidase homolog 1 [Beta vulgaris subsp. vulgaris]	GO:0051213(dioxygenase activity)	00402(Benzoxazinoid biosynthesis)	K13229	EC:1.14.11.59	3.54	4.48	3.93	1.98	2.43	2.7	2.26	2.48	2.36	6.11	7.14	7.05	15.8	12.99	16.37	2.88385e-88	3.24325e-87
Bv8_200900_aouq	blue	507.96	PREDICTED: uncharacterized protein LOC104882923 [Beta vulgaris subsp. vulgaris]	GO:0003674(molecular_function);GO:0005634(nucleus);GO:0008150(biological_process)	NA	NA	NA	1.11	0.61	0.83	2.56	2.91	2.09	3.62	4.87	3.98	2.67	2.41	4.48	17.12	22.98	20.94	1.04541e-76	9.95294e-76
Bv6_154770_kcxz	blue	507.809	PREDICTED: adagio protein 3 [Beta vulgaris subsp. vulgaris]	GO:0004842(ubiquitin-protein transferase activity);GO:0005515(protein binding);GO:0005634(nucleus);GO:0005737(cytoplasm);GO:0006355(regulation of transcription, DNA-templated);GO:0006511(ubiquitin-dependent protein catabolic process);GO:0007623(circadian rhythm);GO:0009637(response to blue light);GO:0009881(photoreceptor activity);GO:0009908(flower development);GO:0009911(positive regulation of f…	04712(Circadian rhythm - plant)	K12116	NA	89.53	100.58	101.52	20.95	21.68	20.66	168.75	184.64	173.24	172.09	168.3	179.32	280.1	277.61	287.29	0	0
Bv8_198580_jxwi	blue	507.545	PREDICTED: uncharacterized protein LOC104902408 [Beta vulgaris subsp. vulgaris]	NA	NA	NA	NA	1.59	2.39	2.75	2.05	1.68	1.33	3.19	2.81	1.85	3.55	3.1	2.94	6.93	6.8	9.52	1.57856e-15	3.58328e-15
Bv6_127720_jfcx	blue	507.442	PREDICTED: uncharacterized protein LOC104894913 [Beta vulgaris subsp. vulgaris]	GO:0003674(molecular_function);GO:0005634(nucleus);GO:0008150(biological_process)	NA	NA	NA	3	4.02	3.68	4.19	3.83	4.16	5.79	5.65	5.84	4.45	4.1	3.77	9.82	9.12	10.42	1.64084e-31	6.42693e-31
Bv6_151500_rini	blue	506.691	PREDICTED: LOW QUALITY PROTEIN: TLC domain-containing protein At5g14285 [Beta vulgaris subsp. vulgaris]	GO:0003674(molecular_function);GO:0008150(biological_process);GO:0009507(chloroplast)	NA	NA	NA	0.32	0.94	0.4	2.68	3.66	2.82	3.13	3.06	2.47	2.71	2.68	3.63	9.41	9.26	10.23	8.26628e-47	4.61649e-46
Bv9_217250_izwy	blue	506.341	PREDICTED: probable pinoresinol-lariciresinol reductase 3 [Beta vulgaris subsp. vulgaris]	GO:0005737(cytoplasm);GO:0010283(pinoresinol reductase activity);GO:0055114(oxidation-reduction process)	NA	NA	NA	14.04	17.23	19.01	12.81	15.71	13.2	14.43	16.27	17.5	16.75	18.66	19.09	43.08	35.23	35.84	2.05585e-21	5.92455e-21
Bv1_006370_qfxe	blue	506.099	PREDICTED: protein WALLS ARE THIN 1 [Beta vulgaris subsp. vulgaris]	GO:0005886(plasma membrane);GO:0006810(transport);GO:0022857(transmembrane transporter activity)	NA	NA	NA	57.49	67.92	69.98	29	28.46	32.12	62.38	62.04	61.36	64.5	65.59	68.36	127.2	114.07	124.81	9.37532e-89	1.061e-87
Bv4_091170_uzgj	blue	505.875	PREDICTED: probable amino acid permease 7 [Beta vulgaris subsp. vulgaris]	GO:0003333(amino acid transmembrane transport);GO:0005886(plasma membrane);GO:0015171(amino acid transmembrane transporter activity)	NA	NA	NA	0.16	0.18	0.1	0.24	0.15	0.13	2.26	3.19	2.87	15.44	15.97	14.68	25.7	24.16	27.69	0	0
Bv4_092420_gomr	blue	505.847	PREDICTED: putative beta-glucosidase 41 [Beta vulgaris subsp. vulgaris]	GO:0008422(beta-glucosidase activity);GO:1901657(glycosyl compound metabolic process)	00500(Starch and sucrose metabolism);00460(Cyanoamino acid metabolism);00940(Phenylpropanoid biosynthesis)	K01188	EC:3.2.1.21	4.18	4.87	4.07	2.31	2.53	2.94	6.5	5.24	4.94	6.93	7	6.53	9.55	8.7	10.31	2.36891e-27	8.23058e-27
Bv9_203230_uupk	blue	505.581	PREDICTED: uncharacterized protein LOC104902598 isoform X1 [Beta vulgaris subsp. vulgaris];PREDICTED: uncharacterized protein LOC104902598 isoform X2 [Beta vulgaris subsp. vulgaris]	GO:0003674(molecular_function);GO:0005737(cytoplasm);GO:0008150(biological_process);GO:0008150(biological_process)	NA	NA	NA	5.7	7.26	5.25	6.04	5.7	6.58	8.42	8.33	7.72	9.94	10.1	7.9	13.95	11.06	13.03	1.0827e-10	1.96076e-10
Bv7_166820_ehax	blue	505.348	hypothetical protein BVRB_7g166820 [Beta vulgaris subsp. vulgaris]	NA	NA	NA	NA	1.61	1.78	2.85	10.06	7.9	8.49	6.25	6.08	5.91	11.73	11.84	10.14	26.89	25.16	28.84	3.70505e-93	4.40931e-92
Bv7_171990_sxrm	blue	505.093	PREDICTED: zinc finger CCCH domain-containing protein 66 [Beta vulgaris subsp. vulgaris]	GO:0003677(DNA binding);GO:0003700(DNA binding transcription factor activity);GO:0005634(nucleus);GO:0006355(regulation of transcription, DNA-templated);GO:0046872(metal ion binding)	NA	NA	NA	93.15	105.88	104.37	116.81	113.11	116.29	101.95	102.58	103.69	115.91	111.64	115.59	305.92	262.69	288.26	1.85012e-72	1.64238e-71
Bv3_065360_dzzz	blue	504.457	PREDICTED: selenium-binding protein 1 [Beta vulgaris subsp. vulgaris]	GO:0000103(sulfate assimilation);GO:0005634(nucleus);GO:0005829(cytosol);GO:0008430(selenium binding);GO:0009506(plasmodesma);GO:0042542(response to hydrogen peroxide);GO:0046686(response to cadmium ion);GO:0071291(cellular response to selenium ion)	NA	NA	NA	17.52	18.68	19.43	58.81	59.23	63.3	69.31	70.24	71.62	72.29	70.87	72	146.84	128.8	134.48	6.02128e-122	1.01734e-120
Bv1_006870_awct	blue	504.423	PREDICTED: uncharacterized protein LOC104889369 isoform X1 [Beta vulgaris subsp. vulgaris]	GO:0003824(catalytic activity);GO:0009507(chloroplast);GO:0050662(coenzyme binding)	NA	NA	NA	17.2	19.02	16.95	14.47	14.25	13.08	34.74	33.03	29.5	27.99	24.57	25.89	45.48	41.09	41.51	4.38997e-54	2.81917e-53
Bv_008630_zneq	blue	504.167	PREDICTED: F-box protein At5g67140 [Beta vulgaris subsp. vulgaris]	GO:0005737(cytoplasm)	NA	NA	NA	7.59	8.92	8.81	8.89	7.77	8.76	18.19	16.86	18.77	17.76	15.49	19.73	25.97	23.52	23.45	3.72475e-49	2.18887e-48
Bv7_172490_rjrk	blue	503.822	PREDICTED: uncharacterized protein LOC104899985 [Beta vulgaris subsp. vulgaris]	GO:0003676(nucleic acid binding);GO:0003700(DNA binding transcription factor activity);GO:0005576(extracellular region);GO:0006355(regulation of transcription, DNA-templated);GO:0008270(zinc ion binding);GO:0016021(integral component of membrane);GO:0031225(anchored component of membrane)	NA	NA	NA	5.61	7.68	5.32	7.48	8.62	5.59	9.11	7.04	7.98	11.23	8.76	11.58	17.13	16.35	16.3	1.78478e-12	3.52567e-12
Bv3_055100_fxjn	blue	503.815	PREDICTED: U-box domain-containing protein 33 [Beta vulgaris subsp. vulgaris]	GO:0004672(protein kinase activity);GO:0004842(ubiquitin-protein transferase activity);GO:0005524(ATP binding);GO:0005634(nucleus);GO:0005886(plasma membrane);GO:0006468(protein phosphorylation);GO:0016301(kinase activity);GO:0016567(protein ubiquitination)	NA	NA	NA	23.04	25.75	22.71	23.13	24.34	26.54	27.61	30.24	27.76	40.53	38.35	38.83	51.67	44.66	50.41	1.65326e-33	6.81219e-33
Bv6_148600_uduk	blue	503.474	PREDICTED: uncharacterized protein LOC104897364 [Beta vulgaris subsp. vulgaris]	GO:0003674(molecular_function);GO:0005739(mitochondrion);GO:0008150(biological_process);GO:0016021(integral component of membrane)	NA	NA	NA	15.07	14.52	15.57	5.21	4.5	4.2	29.45	29.86	27.91	17.76	17.86	16.03	48.99	48.14	49.1	0	0
Bv5_103690_umfp	blue	503.089	PREDICTED: probable serine/threonine-protein kinase WNK10 isoform X1 [Beta vulgaris subsp. vulgaris]	GO:0004674(protein serine/threonine kinase activity);GO:0005829(cytosol);GO:0006468(protein phosphorylation);GO:0035556(intracellular signal transduction)	NA	NA	NA	30.19	33.57	31.02	46.39	46.5	44.83	41.95	38.96	41.66	53.04	53.02	51.06	83.35	77.99	81.62	4.27369e-76	4.03255e-75
Bv6_151990_kkdq	blue	502.76	hypothetical protein BVRB_6g151990 [Beta vulgaris subsp. vulgaris]	NA	NA	NA	NA	1.08	1.52	1.02	2.31	2.26	1.66	2.5	2.41	2.14	1.59	2	1.87	5.95	5.46	5.98	1.06456e-44	5.68083e-44
Bv6_155280_wyee	blue	502.729	PREDICTED: transcription factor MYB1R1 [Beta vulgaris subsp. vulgaris]	GO:0003676(nucleic acid binding);GO:0003677(DNA binding);GO:0003682(chromatin binding);GO:0003700(DNA binding transcription factor activity);GO:0005634(nucleus);GO:0006351(transcription, DNA-templated);GO:0006355(regulation of transcription, DNA-templated);GO:0008270(zinc ion binding);GO:0009651(response to salt stress);GO:0009723(response to ethylene);GO:0009733(response to auxin);GO:0009737(res…	NA	NA	NA	8.53	10.09	9.24	9.69	9.7	6.91	12.76	12.35	10.79	8.91	8.51	8.28	30.8	26.06	28.75	1.83134e-48	1.05925e-47
Bv5_125960_gfmq	blue	502.417	PREDICTED: bidirectional sugar transporter SWEET7 [Beta vulgaris subsp. vulgaris]	GO:0008643(carbohydrate transport);GO:0016021(integral component of membrane);GO:0051119(sugar transmembrane transporter activity)	NA	NA	NA	0.22	0.3	0.32	0.4	0.55	0.21	1.25	1.14	1.34	1.77	1.96	1.6	2.41	2.27	2.42	1.07276e-27	3.76576e-27
Bv6_151370_xxno	blue	502.376	PREDICTED: uncharacterized protein LOC104897620 isoform X2 [Beta vulgaris subsp. vulgaris]	GO:0005634(nucleus)	NA	NA	NA	13.69	15.01	14.18	9.91	8.85	9.84	19.76	16.36	14.8	21.48	19.27	18.31	26.06	28.1	32.24	3.50427e-31	1.35692e-30
Bv_009770_rkut	blue	501.956	PREDICTED: uncharacterized protein LOC104884595 [Beta vulgaris subsp. vulgaris]	NA	NA	NA	NA	1	0.62	0.6	0.21	0.12	0.37	1.02	0.67	0.21	0.78	0.87	0.12	4.36	3.87	4.28	4.39113e-12	8.50162e-12
Bv8_193620_qqxn	blue	501.441	hypothetical protein BVRB_8g193620 isoform A [Beta vulgaris subsp. vulgaris];PREDICTED: probable glycosyltransferase At3g42180 isoform X2 [Beta vulgaris subsp. vulgaris]	GO:0000139(Golgi membrane);GO:0003824(catalytic activity);GO:0005576(extracellular region);GO:0005794(Golgi apparatus);GO:0006486(protein glycosylation);GO:0016020(membrane);GO:0016021(integral component of membrane);GO:0016757(transferase activity, transferring glycosyl groups);GO:0071555(cell wall organization);GO:0071555(cell wall organization)	NA	NA	NA	0	0.21	0	0.44	0.41	0.71	3.42	4.42	3.52	4.93	3.96	3.21	7.38	5.35	6.61	2.84725e-60	2.04607e-59
Bv7_178920_dhdq	blue	500.604	PREDICTED: protein-S-isoprenylcysteine O-methyltransferase B [Beta vulgaris subsp. vulgaris]	GO:0004671(protein C-terminal S-isoprenylcysteine carboxyl O-methyltransferase activity);GO:0005783(endoplasmic reticulum);GO:0005789(endoplasmic reticulum membrane);GO:0006481(C-terminal protein methylation);GO:0009788(negative regulation of abscisic acid-activated signaling pathway);GO:0009908(flower development);GO:0016021(integral component of membrane);GO:0048367(shoot system development)	00900(Terpenoid backbone biosynthesis)	K00587	EC:2.1.1.100	7.58	7.28	10.36	7.7	6.75	7.08	10.84	10.87	9.58	13.67	9.61	10.49	16.37	16.71	17.64	9.4465e-11	1.71819e-10
Bv5_108040_rzos	blue	500.573	hypothetical protein BVRB_5g108040 [Beta vulgaris subsp. vulgaris]	NA	NA	NA	NA	0	0	0	0	0	0	0	0	0	0	0	0	1.66	1.74	1.51	1.2794e-70	1.09679e-69
Bv6_141100_yout	blue	500.246	PREDICTED: phosphoenolpyruvate carboxylase 4 [Beta vulgaris subsp. vulgaris]	GO:0005829(cytosol);GO:0008964(phosphoenolpyruvate carboxylase activity)	00620(Pyruvate metabolism);00710(Carbon fixation in photosynthetic organisms)	K01595	EC:4.1.1.31	15	20.08	20.44	23.96	24.59	25.73	33.38	32.1	38.12	58.46	57.25	62.71	80.76	75.26	81.43	1.08838e-85	1.17694e-84
Bv5_108230_exsn	blue	500.133	hypothetical protein BVRB_5g108230 [Beta vulgaris subsp. vulgaris]	NA	NA	NA	NA	5.89	7.13	6.81	6.06	5.76	3.93	6.89	7.83	7.81	9.51	7.21	7.2	13.91	12.06	15.92	1.7748e-13	3.67373e-13
Bv8_198010_iscp	blue	500.063	PREDICTED: putative clathrin assembly protein At5g57200 [Beta vulgaris subsp. vulgaris]	GO:0005545(1-phosphatidylinositol binding);GO:0005634(nucleus);GO:0005794(Golgi apparatus);GO:0005905(clathrin-coated pit);GO:0006897(endocytosis);GO:0030136(clathrin-coated vesicle);GO:0030276(clathrin binding);GO:0048268(clathrin coat assembly)	NA	NA	NA	2.15	4.01	4.69	3.48	2.36	2.28	6.91	5.05	5.92	4.15	5.66	4.09	15.39	10.57	13.17	3.34377e-13	6.83415e-13
Bv6_152520_msnf	blue	499.565	PREDICTED: ganglioside-induced differentiation-associated protein 2 [Beta vulgaris subsp. vulgaris]	GO:0003674(molecular_function);GO:0005737(cytoplasm);GO:0008150(biological_process)	NA	NA	NA	18.91	20.85	18.48	19.73	21.08	20.7	27.46	29.29	27.96	40.19	38.09	38.2	45.86	47.87	47.04	3.15956e-62	2.34737e-61
Bv2_036420_qtkt	blue	498.921	hypothetical protein BVRB_2g036420 [Beta vulgaris subsp. vulgaris]	NA	NA	NA	NA	7.79	8.97	8.81	1.56	1.82	1.09	14.07	15.26	14.11	6.84	5.02	6.31	38.86	35	33.54	5.59472e-153	1.29066e-151
Bv1_003370_nxxs	blue	498.78	PREDICTED: polyubiquitin-like [Beta vulgaris subsp. vulgaris]	GO:0005634(nucleus);GO:0005737(cytoplasm);GO:0006464(cellular protein modification process);GO:0007568(aging);GO:0009751(response to salicylic acid)	NA	NA	NA	23.55	26.3	26.32	127.14	123.83	130.32	315.14	316.87	326.88	297.05	301.13	303.99	464.62	451.03	481.49	9.21799e-77	8.79473e-76
Bv_005360_xxys	blue	498.773	PREDICTED: ABSCISIC ACID-INSENSITIVE 5-like protein 2 isoform X2 [Beta vulgaris subsp. vulgaris]	GO:0000977(RNA polymerase II regulatory region sequence-specific DNA binding);GO:0001228(transcriptional activator activity, RNA polymerase II transcription regulatory region sequence-specific DNA binding);GO:0003677(DNA binding);GO:0003700(DNA binding transcription factor activity);GO:0005634(nucleus);GO:0006351(transcription, DNA-templated);GO:0006355(regulation of transcription, DNA-templated)…	04075(Plant hormone signal transduction)	K14432	NA	0.81	0.85	0.55	0.76	0.85	0.79	2.75	3.53	2.74	3.78	4	4.61	5.53	7.12	5.85	1.3324e-63	1.01461e-62
Bv_005090_dwxc	blue	498.468	PREDICTED: BTB/POZ domain-containing protein At1g04390 isoform X1 [Beta vulgaris subsp. vulgaris]	GO:0008150(biological_process);GO:0009507(chloroplast)	NA	NA	NA	7.21	6.91	7.55	7.84	8.23	8.31	11.4	10.33	11.16	10.69	9.97	11.09	16.9	13.12	14.05	2.47325e-20	6.84777e-20
Bv1_014710_oyfq	blue	498.343	PREDICTED: uncharacterized protein LOC104901752 [Beta vulgaris subsp. vulgaris]	NA	NA	NA	NA	0.85	0.59	0.9	0.09	0.05	0	0.51	0.86	0.74	0.73	1.05	0.57	2.31	2.45	2.34	6.19607e-32	2.45253e-31
Bv1_021300_runx	blue	497.632	PREDICTED: uncharacterized aarF domain-containing protein kinase At1g79600, chloroplastic [Beta vulgaris subsp. vulgaris]	GO:0004672(protein kinase activity);GO:0005515(protein binding);GO:0005524(ATP binding);GO:0005886(plasma membrane);GO:0006468(protein phosphorylation);GO:0006995(cellular response to nitrogen starvation);GO:0009414(response to water deprivation);GO:0009507(chloroplast);GO:0009644(response to high light intensity);GO:0009658(chloroplast organization);GO:0010114(response to red light);GO:0010287(p…	NA	NA	NA	65.22	74.43	76.37	68.04	68.77	72.71	104.24	102.23	108.77	79.46	75.93	77.14	163.07	144.39	151.52	1.85402e-27	6.45908e-27
Bv9_214180_gjwr	blue	497.414	PREDICTED: myb-related protein 308 [Beta vulgaris subsp. vulgaris]	GO:0000981(RNA polymerase II transcription factor activity, sequence-specific DNA binding);GO:0001135(transcription factor activity, RNA polymerase II transcription factor recruiting);GO:0003677(DNA binding);GO:0003700(DNA binding transcription factor activity);GO:0005515(protein binding);GO:0005634(nucleus);GO:0006351(transcription, DNA-templated);GO:0006357(regulation of transcription by RNA po…	NA	NA	NA	39.14	44.15	41.74	26.97	32.55	25.8	40.85	45.31	46.38	34.95	38.4	30.73	114.65	131.46	139.82	1.38207e-86	1.51364e-85
Bv5_115680_wnjp	blue	496.797	0	NA	NA	NA	NA	0.15	0.14	0.07	0.44	0.12	0.22	1.52	1	1.49	1.75	1.4	1.39	2.67	2.59	2.07	4.4229e-29	1.61957e-28
Bv9_215340_ipou	blue	496.669	hypothetical protein BVRB_9g215340 [Beta vulgaris subsp. vulgaris]	NA	NA	NA	NA	0.1	0	0.22	1.36	0.63	0.73	1.29	1	1.45	0.83	0.28	0.41	10.19	8.52	8.15	2.94731e-47	1.66094e-46
Bv6_154880_psaj	blue	496.36	PREDICTED: uncharacterized protein LOC104898002 [Beta vulgaris subsp. vulgaris]	GO:0003674(molecular_function);GO:0005634(nucleus);GO:0008150(biological_process);GO:0005773(vacuole);GO:0005773(vacuole)	NA	NA	NA	213.39	240.99	228.85	341.83	348.22	344.11	233.3	237.09	221.56	199.38	205.15	189.9	44.11	40.09	42.9	2.88108e-247	1.32928e-245
Bv3_065170_yrgo	blue	496.024	PREDICTED: uncharacterized protein LOC104889729 [Beta vulgaris subsp. vulgaris]	NA	NA	NA	NA	0.64	1.22	0.76	0.52	0.33	0.62	1.16	1.29	1.3	0.88	0.92	0.93	3.35	2.45	2.68	2.28357e-18	5.87932e-18
Bv8_185590_kjww	blue	495.927	PREDICTED: vacuolar iron transporter 1 [Beta vulgaris subsp. vulgaris]	GO:0005381(iron ion transmembrane transporter activity);GO:0005384(manganese ion transmembrane transporter activity);GO:0005774(vacuolar membrane);GO:0006880(intracellular sequestering of iron ion);GO:0030026(cellular manganese ion homeostasis);GO:0071281(cellular response to iron ion);GO:0071421(manganese ion transmembrane transport)	NA	NA	NA	10.04	11.86	11.33	12.31	16.5	13.69	17.52	17.76	16.13	18.27	19.06	23.02	25.94	27.54	30.63	6.41814e-22	1.88798e-21
Bv9_214800_iwpe	blue	495.318	PREDICTED: aquaporin AQPAe.a [Beta vulgaris subsp. vulgaris]	GO:0005887(integral component of plasma membrane);GO:0009705(plant-type vacuole membrane);GO:0009992(cellular water homeostasis);GO:0015250(water channel activity);GO:0015254(glycerol channel activity);GO:0034220(ion transmembrane transport);GO:0042807(central vacuole)	NA	NA	NA	7.75	8.96	8.45	16.23	16.95	13.73	20.8	20.44	18.69	9.93	12.08	10.21	66.51	63.52	63.18	4.69002e-157	1.11778e-155
Bv4_079240_zfig	blue	494.888	PREDICTED: transcription factor MYB86 [Beta vulgaris subsp. vulgaris]	GO:0000981(RNA polymerase II transcription factor activity, sequence-specific DNA binding);GO:0001135(transcription factor activity, RNA polymerase II transcription factor recruiting);GO:0003677(DNA binding);GO:0003700(DNA binding transcription factor activity);GO:0005634(nucleus);GO:0006351(transcription, DNA-templated);GO:0006355(regulation of transcription, DNA-templated);GO:0006357(regulation…	NA	NA	NA	1.24	1.05	0.66	0.44	1.28	0.79	1.17	1.19	0.82	1.53	1.34	0.64	4.56	5.08	4.54	6.91721e-13	1.39257e-12
Bv8_199170_kush	blue	494.338	PREDICTED: heat stress transcription factor A-7a [Beta vulgaris subsp. vulgaris]	GO:0042802(identical protein binding)	NA	NA	NA	4.03	8	5.33	13.08	12.5	16.13	8.59	8.49	8.81	13.5	18.18	14.5	49.34	44.09	44.73	5.01066e-57	3.39849e-56
Bv5_106050_aukz	blue	494.265	PREDICTED: uncharacterized protein LOC104892921 [Beta vulgaris subsp. vulgaris]	GO:0006508(proteolysis);GO:0008233(peptidase activity);GO:0009507(chloroplast);GO:0016021(integral component of membrane);GO:0016021(integral component of membrane)	00970(Aminoacyl-tRNA biosynthesis);00970(Aminoacyl-tRNA biosynthesis)	K01883	EC:6.1.1.16	64.41	71.9	73.77	85.68	93.86	96.95	131.8	133.84	131.25	133.3	130.45	141.23	172.49	159.66	174.36	3.08129e-30	1.16188e-29
Bv7_157660_txoj	blue	494.252	PREDICTED: alanine--glyoxylate aminotransferase 2 homolog 3, mitochondrial [Beta vulgaris subsp. vulgaris]	GO:0005739(mitochondrion);GO:0008453(alanine-glyoxylate transaminase activity);GO:0030170(pyridoxal phosphate binding);GO:0042802(identical protein binding)	00250(Alanine, aspartate and glutamate metabolism);00260(Glycine, serine and threonine metabolism);00270(Cysteine and methionine metabolism);00280(Valine, leucine and isoleucine degradation)	K00827	EC:2.6.1.44;EC:2.6.1.40	16.98	19.87	22.71	58.55	61.07	61.05	45.71	39.53	44.13	45.41	45.83	49.11	227.29	210.87	226.07	1.3267e-267	7.00075e-266
Bv8_193150_stck	blue	494.201	PREDICTED: monogalactosyldiacylglycerol synthase 2, chloroplastic [Beta vulgaris subsp. vulgaris]	GO:0006631(fatty acid metabolic process);GO:0009247(glycolipid biosynthetic process);GO:0009507(chloroplast);GO:0009707(chloroplast outer membrane);GO:0016036(cellular response to phosphate starvation);GO:0016757(transferase activity, transferring glycosyl groups);GO:0019374(galactolipid metabolic process);GO:0019375(galactolipid biosynthetic process);GO:0035250(UDP-galactosyltransferase activity…	00561(Glycerolipid metabolism)	K03715	EC:2.4.1.46	15.54	15.07	16.07	12.29	10.62	11.25	25.12	26.33	26.01	20.38	22	14.92	36.25	39.59	37.73	2.23162e-43	1.16428e-42
Bv6_155580_sdei	blue	493.929	PREDICTED: uncharacterized protein LOC104908402 [Beta vulgaris subsp. vulgaris]	GO:0005739(mitochondrion);GO:0048367(shoot system development)	NA	NA	NA	3.06	4.49	3	2.14	1.43	1.47	4.5	4.43	3.89	3.05	2.96	3.71	9.36	11.49	10.26	8.59196e-34	3.56723e-33
Bv5_121680_xqns	blue	493.827	PREDICTED: universal stress protein PHOS32 [Beta vulgaris subsp. vulgaris]	GO:0005634(nucleus);GO:0005773(vacuole);GO:0006950(response to stress);GO:0016787(hydrolase activity)	NA	NA	NA	22.54	26.25	24.49	17.63	21.72	17.74	126.32	120.86	111.91	95.06	94.02	102.05	162.13	154.14	167.76	0	0
Bv6_154750_tpcu	blue	493.224	PREDICTED: protein NRT1/ PTR FAMILY 2.12 [Beta vulgaris subsp. vulgaris]	GO:0005215(transporter activity);GO:0005886(plasma membrane);GO:0006857(oligopeptide transport);GO:0015293(symporter activity);GO:0015706(nitrate transport);GO:0016020(membrane);GO:0016021(integral component of membrane);GO:0042128(nitrate assimilation);GO:0055085(transmembrane transport);GO:0080054(low-affinity nitrate transmembrane transporter activity)	NA	NA	NA	4.42	5.89	6.64	6.03	6.7	6.12	13.87	14.38	13.79	13.38	14.84	14.98	19.21	17.1	20.61	2.91684e-48	1.68385e-47
Bv5_101660_duji	blue	493.222	PREDICTED: probable aminotransferase ACS10 [Beta vulgaris subsp. vulgaris];hypothetical protein BVRB_5g101660 isoform B [Beta vulgaris subsp. vulgaris]	GO:0004069(L-aspartate:2-oxoglutarate aminotransferase activity);GO:0006520(cellular amino acid metabolic process);GO:0008483(transaminase activity);GO:0008793(aromatic-amino-acid:2-oxoglutarate aminotransferase activity);GO:0009058(biosynthetic process);GO:0009693(ethylene biosynthetic process);GO:0016847(1-aminocyclopropane-1-carboxylate synthase activity);GO:0030170(pyridoxal phosphate binding…	NA	NA	NA	25.86	26.07	23.53	34.73	34.08	32.3	36.47	38	37.51	31.87	32.66	32.7	56.31	55.07	59.77	2.71738e-49	1.60211e-48
Bv4_080420_jagj	blue	492.585	PREDICTED: berberine bridge enzyme-like 8 [Beta vulgaris subsp. vulgaris]	GO:0005576(extracellular region);GO:0009055(electron transfer activity);GO:0009507(chloroplast);GO:0016614(oxidoreductase activity, acting on CH-OH group of donors);GO:0050660(flavin adenine dinucleotide binding);GO:0055114(oxidation-reduction process)	00052(Galactose metabolism);00500(Starch and sucrose metabolism)	K01187	EC:3.2.1.20	0.13	0.07	0.04	0.28	0.19	0.04	0.08	0.04	0.08	0	0.1	0.07	3.39	3.08	3.74	1.67539e-38	7.83852e-38
Bv4_091360_cztr	blue	492.53	hypothetical protein BVRB_4g091360 [Beta vulgaris subsp. vulgaris]	NA	NA	NA	NA	0.94	0.69	0.85	5.77	5.16	4.14	1.27	0.61	1.42	6.15	7.49	6.26	25.05	23.56	26.8	5.23945e-140	1.07747e-138
Bv5_107480_tgxq	blue	491.79	PREDICTED: replication protein A 70 kDa DNA-binding subunit A [Beta vulgaris subsp. vulgaris]	GO:0005634(nucleus)	03030(DNA replication);03420(Nucleotide excision repair);03430(Mismatch repair);03440(Homologous recombination)	K07466	NA	3.59	5.46	4.9	4.04	4.05	4.42	6.55	6.13	7.53	9.01	8.87	9.3	11.46	10.69	11.72	8.52689e-31	3.26522e-30
Bv2_025030_okps	blue	491.294	hypothetical protein BVRB_2g025030 [Beta vulgaris subsp. vulgaris]	NA	NA	NA	NA	0	0.66	0.48	0.2	0.61	0.24	1	1.96	0.4	1.5	1.23	1.81	7.31	4.92	4.53	5.0772e-11	9.33664e-11
Bv7_166330_cigf	blue	490.693	hypothetical protein BVRB_7g166330 [Beta vulgaris subsp. vulgaris]	NA	NA	NA	NA	3.52	5.28	4.85	11.4	9.63	9.14	16.05	13.24	12.02	20.37	19.58	16.2	25.25	25.25	28.89	6.58561e-57	4.45159e-56
Bv2_025390_tptq	blue	490.502	PREDICTED: uncharacterized protein LOC104904586 [Beta vulgaris subsp. vulgaris]	GO:0005794(Golgi apparatus);GO:0008150(biological_process);GO:0016021(integral component of membrane);GO:0016740(transferase activity);GO:0016757(transferase activity, transferring glycosyl groups)	00514(Other types of O-glycan biosynthesis)	K13675	EC:2.4.1.-	14.86	18.32	16.73	21.05	21.12	21.18	23.67	23.51	22.94	28.32	29.01	28.4	33.09	34.7	36.96	4.94859e-42	2.52038e-41
Bv9_205020_phfn	blue	490.307	PREDICTED: pentatricopeptide repeat-containing protein At5g61800 isoform X1 [Beta vulgaris subsp. vulgaris]	GO:0003674(molecular_function);GO:0003723(RNA binding);GO:0005739(mitochondrion);GO:0008150(biological_process)	NA	NA	NA	4.81	4.34	3.13	4.28	4.78	4.1	5.74	5.24	6.36	5.44	6.39	6.99	9.43	10.83	12.98	1.40024e-13	2.91316e-13
Bv2_032460_itto	blue	489.799	hypothetical protein BVRB_016620, partial [Beta vulgaris subsp. vulgaris]	NA	NA	NA	NA	1.26	0.76	0.74	0.1	0.08	0	1.57	0.51	0.94	1.28	1.18	1.02	3.44	3.79	4.97	1.09024e-23	3.38237e-23
Bv3_048210_tuuw	blue	489.772	PREDICTED: AP2-associated protein kinase 1 [Beta vulgaris subsp. vulgaris]	GO:0004674(protein serine/threonine kinase activity);GO:0005737(cytoplasm);GO:0006468(protein phosphorylation);GO:0030100(regulation of endocytosis)	NA	NA	NA	3.12	3.28	3.49	2.43	2.19	2.58	4.28	4.31	4.45	2.86	3.57	3.4	6.58	6.49	7.68	3.18145e-23	9.74085e-23
Bv8_188220_naqu	blue	489.376	PREDICTED: GDSL esterase/lipase At5g45670 [Beta vulgaris subsp. vulgaris]	GO:0016298(lipase activity)	00561(Glycerolipid metabolism)	K00679	EC:2.3.1.158	884.41	991.76	1016.35	1323.11	1311.98	1293.15	620.91	625.4	599.19	639.32	646.45	638.83	170.78	158.64	162.03	1.51326e-54	9.79483e-54
Bv8_190290_tyoi	blue	487.984	PREDICTED: sulfate transporter 1.2 [Beta vulgaris subsp. vulgaris]	GO:0005887(integral component of plasma membrane);GO:0015116(sulfate transmembrane transporter activity)	NA	NA	NA	3	2.38	4.05	4.27	3.68	5.38	1.24	0.59	1.5	3.27	4.25	2.15	61.51	55.37	54.49	5.81888e-151	1.32036e-149
Bv8_184360_ryex	blue	487.911	PREDICTED: nuclear transcription factor Y subunit B-6 [Beta vulgaris subsp. vulgaris]	GO:0003700(DNA binding transcription factor activity);GO:0005515(protein binding);GO:0005634(nucleus);GO:0006351(transcription, DNA-templated);GO:0006355(regulation of transcription, DNA-templated);GO:0009738(abscisic acid-activated signaling pathway);GO:0033613(activating transcription factor binding);GO:0043565(sequence-specific DNA binding);GO:0045893(positive regulation of transcription, DNA-…	NA	NA	NA	0	0	0	0	0.35	0.07	0	0	0	0.15	0	0.36	2.44	2.14	2.9	2.97226e-13	6.08936e-13
Bv6_139540_uhwc	blue	487.455	hypothetical protein BVRB_6g139540 [Beta vulgaris subsp. vulgaris]	NA	NA	NA	NA	0.79	0.71	0.72	0.69	0.37	0.4	1.51	1.61	1.26	2.41	1.82	1.44	2.54	2.85	3.33	4.87297e-22	1.43886e-21
Bv6_148700_wcrq	blue	487.266	PREDICTED: phosphatidylinositol 3-kinase, root isoform isoform X1 [Beta vulgaris subsp. vulgaris];PREDICTED: phosphatidylinositol 3-kinase, root isoform isoform X2 [Beta vulgaris subsp. vulgaris]	GO:0005942(phosphatidylinositol 3-kinase complex);GO:0016303(1-phosphatidylinositol-3-kinase activity);GO:0016303(1-phosphatidylinositol-3-kinase activity)	00562(Inositol phosphate metabolism);04070(Phosphatidylinositol signaling system);04145(Phagosome);04136(Autophagy - other eukaryotes);04136(Autophagy - other eukaryotes)	K00914	EC:2.7.1.137	13.55	15.85	14.46	18.54	19.28	18.22	23.13	22.4	23.17	24.62	27.52	26.38	35.91	29.45	31.75	2.03139e-38	9.4721e-38
Bv6_134890_spue	blue	487.219	PREDICTED: 7-deoxyloganetin glucosyltransferase-like [Beta vulgaris subsp. vulgaris]	GO:0009813(flavonoid biosynthetic process);GO:0043231(intracellular membrane-bounded organelle);GO:0052696(flavonoid glucuronidation);GO:0080043(quercetin 3-O-glucosyltransferase activity);GO:0080044(quercetin 7-O-glucosyltransferase activity)	NA	NA	NA	1.86	1.6	1.75	3.29	2.4	3.29	5.91	6.25	5.94	2.54	2.65	2.63	13.83	15.26	13.96	7.05519e-107	1.01318e-105
Bv4_086570_mxor	blue	486.082	PREDICTED: probable aminotransferase TAT2 isoform X2 [Beta vulgaris subsp. vulgaris]	GO:0004838(L-tyrosine:2-oxoglutarate aminotransferase activity);GO:0005737(cytoplasm);GO:0005829(cytosol);GO:0006572(tyrosine catabolic process);GO:0008483(transaminase activity);GO:0009058(biosynthetic process);GO:0010189(vitamin E biosynthetic process);GO:0030170(pyridoxal phosphate binding)	00270(Cysteine and methionine metabolism);00350(Tyrosine metabolism);00360(Phenylalanine metabolism);00400(Phenylalanine, tyrosine and tryptophan biosynthesis);00130(Ubiquinone and other terpenoid-quinone biosynthesis);00950(Isoquinoline alkaloid biosynthesis);00960(Tropane, piperidine and pyridine alkaloid biosynthesis)	K00815	EC:2.6.1.5	0.84	0.94	1.1	1.33	1.36	1.06	3.2	3.03	2.76	2.24	2.33	1.9	3.76	4.42	4.86	2.83517e-34	1.19002e-33
Bv4_078890_wdzc	blue	485.926	PREDICTED: protein CHROMATIN REMODELING 24 [Beta vulgaris subsp. vulgaris];hypothetical protein BVRB_4g078890 isoform B [Beta vulgaris subsp. vulgaris]	GO:0003677(DNA binding);GO:0004386(helicase activity);GO:0005524(ATP binding);GO:0005634(nucleus);GO:0006310(DNA recombination);GO:0045951(positive regulation of mitotic recombination);GO:0046686(response to cadmium ion);GO:0046686(response to cadmium ion)	NA	NA	NA	2.36	3.08	2.67	1.73	2.43	2.51	4.32	3.91	3.92	3.98	4	4.32	5.16	5.53	5.55	1.4118e-20	3.94164e-20
Bv1_007080_jsgc	blue	485.909	PREDICTED: abscisic acid 8'-hydroxylase 4 isoform X1 [Beta vulgaris subsp. vulgaris]	GO:0004497(monooxygenase activity);GO:0007275(multicellular organism development);GO:0010268(brassinosteroid homeostasis);GO:0016125(sterol metabolic process);GO:0016132(brassinosteroid biosynthetic process)	00905(Brassinosteroid biosynthesis)	K12637	EC:1.14.13.112	0.55	0.31	0.54	1.99	2.17	2.42	4.34	4.6	3.47	4.47	5.26	4.24	7.34	7.19	6.47	2.15948e-88	2.43165e-87
Bv9_220710_ipdk	blue	485.624	hypothetical protein BVRB_9g220710 isoform A [Beta vulgaris subsp. vulgaris];PREDICTED: ras-related protein RHN1-like isoform X5 [Beta vulgaris subsp. vulgaris]	GO:0005768(endosome);GO:0030139(endocytic vesicle);GO:0030139(endocytic vesicle)	04144(Endocytosis);04145(Phagosome);04145(Phagosome)	K07887	NA	2.58	3.24	3.39	3.68	4.6	5.47	5.58	6.48	3.75	7.4	8.83	8.02	12.01	10.75	12.67	3.69672e-18	9.45004e-18
Bv8_180920_chnh	blue	485.426	PREDICTED: probable cysteine protease RD21C [Beta vulgaris subsp. vulgaris]	GO:0004197(cysteine-type endopeptidase activity);GO:0005615(extracellular space);GO:0005764(lysosome);GO:0051603(proteolysis involved in cellular protein catabolic process)	NA	NA	NA	2.99	4.53	3.02	3.92	4.16	4.7	5.46	6.98	6.24	7.87	6.96	6.78	9.07	8.88	10.49	6.66198e-15	1.47195e-14
Bv6_134750_zufq	blue	484.841	PREDICTED: GDSL esterase/lipase At2g23540 [Beta vulgaris subsp. vulgaris]	GO:0005576(extracellular region);GO:0016042(lipid catabolic process);GO:0016788(hydrolase activity, acting on ester bonds);GO:0052689(carboxylic ester hydrolase activity)	00561(Glycerolipid metabolism)	K00679	EC:2.3.1.158	0.12	0	0.18	0.49	0.33	0.06	0.11	0	0.24	0.98	0.71	1.05	2.43	1.96	2.23	6.2315e-09	1.0272e-08
Bv3_067230_yueg	blue	484.65	PREDICTED: bidirectional sugar transporter SWEET17 [Beta vulgaris subsp. vulgaris]	GO:0008643(carbohydrate transport);GO:0016021(integral component of membrane);GO:0051119(sugar transmembrane transporter activity)	NA	NA	NA	1.68	1.76	1.92	0.44	0.07	0.15	2.96	1.82	1.88	1.73	3.89	2.49	7.15	5.31	5.97	8.50799e-27	2.9094e-26
Bv7_165490_giri	blue	484.011	PREDICTED: glutathione S-transferase U8 [Beta vulgaris subsp. vulgaris]	GO:0004364(glutathione transferase activity);GO:0005737(cytoplasm);GO:0006749(glutathione metabolic process);GO:0009407(toxin catabolic process)	00480(Glutathione metabolism)	K00799	EC:2.5.1.18	1.64	2.36	2.07	6.81	6.72	7.63	4.37	5.13	3.8	11.24	11.56	11.74	25.94	19.83	25.57	2.21273e-96	2.74214e-95
Bv4_091130_ekaa	blue	483.55	hypothetical protein BVRB_4g091130 [Beta vulgaris subsp. vulgaris]	GO:0006457(protein folding);GO:0009507(chloroplast)	00240(Pyrimidine metabolism);00250(Alanine, aspartate and glutamate metabolism)	K01956	EC:6.3.5.5	11.19	10.72	11.13	7.24	7.5	5.78	25.03	28.98	28.93	14.37	14.29	15.83	42.11	42.28	47.11	1.94597e-114	3.05548e-113
Bv5_105040_cwch	blue	483.544	PREDICTED: uncharacterized protein LOC104892809 [Beta vulgaris subsp. vulgaris]	GO:0003674(molecular_function);GO:0005634(nucleus);GO:0008150(biological_process);GO:0009507(chloroplast);GO:0016021(integral component of membrane)	NA	NA	NA	1.21	1.81	1.66	2.9	3.23	2.76	2.64	3.28	1.95	3.52	3.02	2.97	6.44	6.9	6.87	9.20922e-23	2.78505e-22
Bv4_092940_ypiw	blue	483.41	PREDICTED: uncharacterized protein LOC104907197 [Beta vulgaris subsp. vulgaris]	GO:0003674(molecular_function);GO:0005634(nucleus);GO:0008150(biological_process)	NA	NA	NA	30.56	34.94	35.89	31.92	33.5	30.32	18.29	21.72	18.49	19.27	21.45	21.85	12.86	8.71	10.1	5.50076e-37	2.46958e-36
Bv_005070_jjst	blue	483.055	PREDICTED: UDP-glycosyltransferase 90A1 [Beta vulgaris subsp. vulgaris]	GO:0008194(UDP-glycosyltransferase activity);GO:0009813(flavonoid biosynthetic process);GO:0043231(intracellular membrane-bounded organelle);GO:0052696(flavonoid glucuronidation)	NA	NA	NA	1.6	1.46	1.29	21.04	22.32	19.06	22.74	22.16	21.56	22.89	22.85	20.6	51.64	52.9	59.19	0	0
Bv6_136020_dwjq	blue	482.532	hypothetical protein BVRB_6g136020 [Beta vulgaris subsp. vulgaris]	NA	NA	NA	NA	4.85	5.08	4.48	2.95	2.76	2.1	4.68	4.72	3.79	3.81	6.16	3.42	11.39	10.43	10.78	4.45446e-20	1.22167e-19
Bv5_124410_drru	blue	482.404	PREDICTED: protein indeterminate-domain 16 [Beta vulgaris subsp. vulgaris]	GO:0003674(molecular_function);GO:0005634(nucleus);GO:0008150(biological_process)	NA	NA	NA	0.24	0.37	0.22	0.06	0.5	0.34	0.5	0.24	0.29	0.38	0.74	0.31	1.85	1.57	1.55	1.01328e-06	1.46461e-06
Bv8_198870_cxym	blue	482.228	PREDICTED: probable receptor-like serine/threonine-protein kinase At5g57670 isoform X1 [Beta vulgaris subsp. vulgaris]	GO:0005524(ATP binding);GO:0005634(nucleus)	NA	NA	NA	3.49	4.55	2.73	5.1	5.2	5.38	7.7	8.59	6.14	7.59	7.03	6.95	10.74	10.05	10.82	1.42762e-11	2.6964e-11
Bv7_165170_gttx	blue	481.427	PREDICTED: uncharacterized protein LOC104899184 [Beta vulgaris subsp. vulgaris]	GO:0003674(molecular_function);GO:0008150(biological_process)	NA	NA	NA	0.68	0.97	0.78	0.93	2.05	2.28	5.48	5.1	3.89	10.38	11.87	12.65	18.01	14.68	16.43	1.75398e-84	1.86531e-83
Bv6_150750_qhyi	blue	480.58	PREDICTED: probable methyltransferase At1g27930 [Beta vulgaris subsp. vulgaris]	GO:0000502(proteasome complex);GO:0005739(mitochondrion);GO:0005768(endosome);GO:0005794(Golgi apparatus);GO:0005802(trans-Golgi network);GO:0008168(methyltransferase activity);GO:0016021(integral component of membrane);GO:0032259(methylation);GO:0045492(xylan biosynthetic process)	NA	NA	NA	21.63	24.64	26	23.4	23.02	25.35	38.25	38.8	38.17	47.21	50.45	46.49	53.68	55.12	63.39	1.40899e-65	1.10907e-64
Bv2_036940_hhmn	blue	480.375	PREDICTED: chalcone--flavonone isomerase [Beta vulgaris subsp. vulgaris]	GO:0005504(fatty acid binding);GO:0005515(protein binding);GO:0005634(nucleus);GO:0005783(endoplasmic reticulum);GO:0006631(fatty acid metabolic process);GO:0009411(response to UV);GO:0009507(chloroplast);GO:0009570(chloroplast stroma);GO:0009705(plant-type vacuole membrane);GO:0009733(response to auxin);GO:0009813(flavonoid biosynthetic process);GO:0010224(response to UV-B);GO:0042406(extrinsic …	00941(Flavonoid biosynthesis)	K01859	EC:5.5.1.6	0.23	0.15	0.13	0.09	0.09	0.05	0.76	0.83	0.76	2.18	1.76	2.01	2.57	2.76	3.4	3.74233e-100	4.90456e-99
Bv1_000660_mpuq	blue	479.644	PREDICTED: protein DETOXIFICATION 54 [Beta vulgaris subsp. vulgaris]	GO:0006855(drug transmembrane transport)	NA	NA	NA	0.32	0.31	0.35	1.95	1.83	1.88	1.8	2.22	3.23	5.15	6.43	6.36	9.98	10.86	8.89	8.76736e-62	6.44707e-61
Bv3_065610_ujad	blue	479.463	hypothetical protein BVRB_3g065610 [Beta vulgaris subsp. vulgaris]	NA	NA	NA	NA	1.95	1.74	1.59	1.68	1.42	1.01	1.98	2.68	1.59	3.31	3.52	2.59	5.6	5	4.36	3.1822e-16	7.47818e-16
Bv6_153460_kmjq	blue	479.44	PREDICTED: galactoside 2-alpha-L-fucosyltransferase [Beta vulgaris subsp. vulgaris]	GO:0005794(Golgi apparatus);GO:0008417(fucosyltransferase activity);GO:0009832(plant-type cell wall biogenesis);GO:0009969(xyloglucan biosynthetic process)	NA	NA	NA	32.88	38.23	36.12	45.27	42.42	48.13	45.36	47.86	48.12	38.97	41.41	42.75	82.65	83.73	82.5	2.24089e-65	1.75774e-64
Bv7_168720_zftj	blue	479.155	PREDICTED: UDP-glycosyltransferase 73C1 [Beta vulgaris subsp. vulgaris]	GO:0008194(UDP-glycosyltransferase activity);GO:0009813(flavonoid biosynthetic process);GO:0043231(intracellular membrane-bounded organelle);GO:0052696(flavonoid glucuronidation)	NA	NA	NA	2.04	3.07	1.94	5.72	5.14	5.43	16.81	17.41	16.77	27.36	24.91	24.75	32.33	29.93	35.26	1.11522e-179	3.19543e-178
Bv_000020_wffg	blue	479.04	PREDICTED: syntaxin-121-like, partial [Beta vulgaris subsp. vulgaris]	GO:0000149(SNARE binding);GO:0005484(SNAP receptor activity);GO:0005886(plasma membrane);GO:0006886(intracellular protein transport);GO:0006887(exocytosis);GO:0006906(vesicle fusion);GO:0012505(endomembrane system);GO:0016021(integral component of membrane);GO:0031201(SNARE complex);GO:0048278(vesicle docking)	04130(SNARE interactions in vesicular transport)	K08486	NA	13.56	14.21	16.01	12.4	13.07	12.33	10.15	9.91	10.21	10.82	11.4	11.39	6.93	5.14	5.86	1.03068e-39	4.97615e-39
Bv2_030010_hror	blue	478.736	PREDICTED: adenine/guanine permease AZG1 [Beta vulgaris subsp. vulgaris]	GO:0005215(transporter activity);GO:0005345(purine nucleobase transmembrane transporter activity);GO:0006863(purine nucleobase transport);GO:0015853(adenine transport);GO:0015854(guanine transport);GO:0016020(membrane);GO:0016021(integral component of membrane);GO:0022857(transmembrane transporter activity)	NA	NA	NA	3.15	3.17	3.08	3.42	3.22	3.72	6.8	6.91	6.48	6.11	5.71	6.12	7.92	8.3	8.21	5.39802e-37	2.42406e-36
Bv6_130580_xmzh	blue	478.386	PREDICTED: uncharacterized protein LOC104895190 [Beta vulgaris subsp. vulgaris]	GO:0005634(nucleus);GO:0005737(cytoplasm)	00260(Glycine, serine and threonine metabolism);00350(Tyrosine metabolism);00360(Phenylalanine metabolism);00410(beta-Alanine metabolism);00950(Isoquinoline alkaloid biosynthesis);00960(Tropane, piperidine and pyridine alkaloid biosynthesis)	K00276	EC:1.4.3.21	26.08	30.59	29.28	22.49	22.72	24.11	18.54	17.27	16.39	17.39	17.65	15.99	8.44	7.6	9.75	1.51425e-72	1.34555e-71
Bv8_197050_mdfs	blue	478.354	hypothetical protein BVRB_8g197050 [Beta vulgaris subsp. vulgaris]	NA	NA	NA	NA	2.53	3.58	3.29	5.27	5.76	4.91	6.54	7.19	6.86	5.73	6.74	5.27	11.85	9.61	10.6	5.76081e-19	1.51772e-18
Bv3_052070_sksu	blue	478.071	PREDICTED: zinc finger protein CONSTANS-LIKE 7 isoform X1 [Beta vulgaris subsp. vulgaris];PREDICTED: uncharacterized protein LOC104888257 isoform X2 [Beta vulgaris subsp. vulgaris]	GO:0003674(molecular_function);GO:0005634(nucleus);GO:0008150(biological_process);GO:0008150(biological_process)	03013(RNA transport);03008(Ribosome biogenesis in eukaryotes);03008(Ribosome biogenesis in eukaryotes)	K03539	EC:3.1.26.5	52.4	53.85	60.45	42.62	44.46	38.6	40.14	43.17	39.32	54.53	55.52	52.93	114.62	108.93	112.72	1.91464e-85	2.05438e-84
Bv3_063560_grmp	blue	478.056	PREDICTED: WAT1-related protein At5g07050 [Beta vulgaris subsp. vulgaris]	GO:0005886(plasma membrane);GO:0006810(transport);GO:0022857(transmembrane transporter activity)	NA	NA	NA	1.19	1.25	0.98	0.47	1.64	1.62	3.39	2.91	3.69	2.34	2.37	2.45	5.12	5.21	4.65	4.00677e-15	8.95847e-15
Bv2_032060_rrem	blue	477.671	PREDICTED: tocopherol cyclase, chloroplastic [Beta vulgaris subsp. vulgaris]	GO:0006631(fatty acid metabolic process);GO:0006979(response to oxidative stress);GO:0009266(response to temperature stimulus);GO:0009507(chloroplast);GO:0009534(chloroplast thylakoid);GO:0009644(response to high light intensity);GO:0009706(chloroplast inner membrane);GO:0009915(phloem sucrose loading);GO:0009941(chloroplast envelope);GO:0009976(tocopherol cyclase activity);GO:0010189(vitamin E b…	00130(Ubiquinone and other terpenoid-quinone biosynthesis)	K09834	EC:5.5.1.24	18.13	19.74	22.5	11.7	12.98	13.06	37.31	37.43	39.64	31.73	30.9	33.57	50.45	46.16	51.71	2.58262e-115	4.11618e-114
Bv5_115250_wxah	blue	477.621	PREDICTED: LRR receptor-like serine/threonine-protein kinase FEI 2 isoform X1 [Beta vulgaris subsp. vulgaris]	GO:0004672(protein kinase activity);GO:0004674(protein serine/threonine kinase activity);GO:0005524(ATP binding);GO:0005886(plasma membrane);GO:0006468(protein phosphorylation);GO:0016021(integral component of membrane)	NA	NA	NA	2.2	2.26	2.07	1.21	1.48	1.28	2.7	2.15	2.43	2.06	2.25	1.55	4.61	5.04	4.46	1.68851e-19	4.53208e-19
Bv8_185240_zzoj	blue	477.42	PREDICTED: ubiquinol oxidase 4, chloroplastic/chromoplastic [Beta vulgaris subsp. vulgaris]	GO:0005739(mitochondrion);GO:0009266(response to temperature stimulus);GO:0009535(chloroplast thylakoid membrane);GO:0009579(thylakoid);GO:0009644(response to high light intensity);GO:0009657(plastid organization);GO:0009658(chloroplast organization);GO:0009916(alternative oxidase activity);GO:0016021(integral component of membrane);GO:0016117(carotenoid biosynthetic process);GO:0046862(chromopla…	NA	NA	NA	16.29	19.71	17.02	19.6	18.34	21.11	54.51	50.19	44.47	65.27	62.71	57.48	78.06	75.97	74.81	1.48965e-126	2.65656e-125
Bv4_094580_utxf	blue	477.383	hypothetical protein BVRB_4g094580 isoform A [Beta vulgaris subsp. vulgaris];hypothetical protein BVRB_4g094580 isoform B [Beta vulgaris subsp. vulgaris]	GO:0000398(mRNA splicing, via spliceosome);GO:0003677(DNA binding);GO:0003723(RNA binding);GO:0005634(nucleus);GO:0005681(spliceosomal complex);GO:0016607(nuclear speck);GO:0030628(pre-mRNA 3'-splice site binding);GO:0046872(metal ion binding);GO:0048573(photoperiodism, flowering);GO:0089701(U2AF);GO:0089701(U2AF)	03040(Spliceosome);03040(Spliceosome)	K12836	NA	6.51	6.43	5.93	5.23	5.89	3.8	5.73	5.98	6.84	9.75	8.94	7.97	13.67	11.55	12.78	9.36286e-19	2.44309e-18
Bv3_064490_qngx	blue	477.37	hypothetical protein BVRB_3g064490 [Beta vulgaris subsp. vulgaris]	NA	NA	NA	NA	3.04	3.98	3.29	0.86	0.89	0.59	2.59	2.36	2.23	4.92	4.96	4.44	8.82	8.03	8.77	7.89749e-94	9.45492e-93
Bv8_183680_zoqu	blue	477.029	PREDICTED: uncharacterized protein At4g19900 [Beta vulgaris subsp. vulgaris]	GO:0005794(Golgi apparatus);GO:0016740(transferase activity);GO:0016757(transferase activity, transferring glycosyl groups)	00601(Glycosphingolipid biosynthesis - lacto and neolacto series);00603(Glycosphingolipid biosynthesis - globo and isoglobo series)	K01988	EC:2.4.1.228	0.45	1.08	0.37	0.25	0.53	0.43	1.45	1.15	2.38	2.5	2.68	1.45	3.84	4.74	3.81	1.04922e-12	2.09472e-12
Bv8_186300_wzfe	blue	476.054	PREDICTED: uncharacterized protein LOC104901003 [Beta vulgaris subsp. vulgaris]	GO:0003674(molecular_function);GO:0008150(biological_process);GO:0009507(chloroplast)	NA	NA	NA	4.83	3.03	3.06	4.08	4.21	5.53	7.33	7.67	6.52	2.87	4.37	4.02	19.91	17.62	17.69	1.14072e-37	5.1978e-37
Bv7_177570_ngpd	blue	475.843	PREDICTED: F-box/kelch-repeat protein At1g51550 [Beta vulgaris subsp. vulgaris]	GO:0004842(ubiquitin-protein transferase activity);GO:0005634(nucleus);GO:0006511(ubiquitin-dependent protein catabolic process)	04712(Circadian rhythm - plant)	K12115	NA	13.34	15.12	17.58	12.16	13.33	12.31	13.92	13.67	15.02	12.92	14.46	11	40.51	35.41	37.51	6.81946e-43	3.52613e-42
Bv2_044110_wxoa	blue	473.883	PREDICTED: uncharacterized protein LOC104887777 isoform X2 [Beta vulgaris subsp. vulgaris]	GO:0003723(RNA binding)	NA	NA	NA	3.74	3.69	3.95	2.22	2.46	2.23	5.23	5.21	4.15	4.23	4.41	3.7	8.51	7.51	6.77	2.50037e-30	9.44212e-30
Bv2_027630_yiig	blue	473.259	PREDICTED: protein AAR2 homolog [Beta vulgaris subsp. vulgaris]	GO:0000244(spliceosomal tri-snRNP complex assembly)	NA	NA	NA	3.08	3.99	3.34	4.86	3.84	4.19	4.14	4.93	4.33	5.69	5.23	5.7	8.02	6.85	7.37	2.34394e-14	5.05474e-14
Bv2_032160_yais	blue	472.885	PREDICTED: protein NRT1/ PTR FAMILY 1.2 [Beta vulgaris subsp. vulgaris]	GO:0005215(transporter activity);GO:0005886(plasma membrane);GO:0006857(oligopeptide transport);GO:0015706(nitrate transport);GO:0016020(membrane);GO:0016021(integral component of membrane);GO:0055085(transmembrane transport);GO:0080054(low-affinity nitrate transmembrane transporter activity)	NA	NA	NA	0.9	0.95	0.94	0.54	0.48	0.58	1.65	1.36	1.48	2.56	2.35	2.52	3.38	3.15	3.02	9.46702e-107	1.35737e-105
Bv9_211040_kcos	blue	472.775	hypothetical protein BVRB_9g211040 [Beta vulgaris subsp. vulgaris]	GO:0004144(diacylglycerol O-acyltransferase activity);GO:0005886(plasma membrane);GO:0019432(triglyceride biosynthetic process);GO:0047196(long-chain-alcohol O-fatty-acyltransferase activity)	NA	NA	NA	0	0	0	0	0	0	0	0	0	0	0	0	2.57	1.59	2.51	1.87681e-21	5.41555e-21
Bv1_008710_zecj	blue	472.293	PREDICTED: protein EXORDIUM [Beta vulgaris subsp. vulgaris]	GO:0003674(molecular_function);GO:0005576(extracellular region);GO:0005615(extracellular space);GO:0005618(cell wall);GO:0005794(Golgi apparatus);GO:0005829(cytosol);GO:0009505(plant-type cell wall);GO:0009741(response to brassinosteroid);GO:0048046(apoplast)	NA	NA	NA	41.14	45.61	48.28	65.8	64.1	67.98	40.74	39.51	40.69	50.78	51.72	51.28	5.01	4.87	5.15	0	0
Bv2_047260_hzch	blue	472.286	hypothetical protein BVRB_2g047260 [Beta vulgaris subsp. vulgaris]	NA	NA	NA	NA	0.14	0.34	0.53	0.27	0.26	0.16	0.22	0	0.26	0.38	0.48	0.07	2.2	2.41	2.58	8.02446e-09	1.31516e-08
Bv2_043280_suqw	blue	472.134	PREDICTED: uncharacterized protein LOC104887702 [Beta vulgaris subsp. vulgaris]	GO:0003674(molecular_function);GO:0005739(mitochondrion);GO:0008150(biological_process);GO:0016021(integral component of membrane)	NA	NA	NA	9.56	11.29	9.35	6.55	4.96	7.67	17.64	19.38	16.07	14.24	13.78	12.82	25.51	27.01	22.76	5.21517e-33	2.11976e-32
Bv6_128040_kdyh	blue	471.724	PREDICTED: probable N-acetyltransferase HLS1 [Beta vulgaris subsp. vulgaris]	GO:0004596(peptide alpha-N-acetyltransferase activity);GO:0006474(N-terminal protein amino acid acetylation);GO:0031248(protein acetyltransferase complex)	NA	NA	NA	1.13	1.72	1.66	0.85	0.47	0.54	0.66	0.72	1.02	1.57	0.65	1.14	9.66	6.89	7.88	3.42239e-51	2.07558e-50
Bv3_064590_ezro	blue	471.655	PREDICTED: disease resistance protein At4g27190 [Beta vulgaris subsp. vulgaris]	GO:0005524(ATP binding);GO:0005739(mitochondrion);GO:0006952(defense response);GO:0043531(ADP binding)	04626(Plant-pathogen interaction)	K13459	NA	4.9	5.02	3.89	3.97	4.04	4.05	2.93	2.67	2.5	2.8	3.55	3.1	1.41	1.28	1.26	2.09981e-22	6.25978e-22
Bv6_152920_xnqc	blue	470.728	PREDICTED: uncharacterized protein At5g65660 [Beta vulgaris subsp. vulgaris]	GO:0003674(molecular_function);GO:0005634(nucleus);GO:0005886(plasma membrane);GO:0008150(biological_process);GO:0016021(integral component of membrane)	NA	NA	NA	5.96	7.02	6.54	4.5	5.22	5.18	12.97	12.96	13.03	10.2	10.24	10.34	16.8	15.45	15.78	4.96986e-108	7.1945e-107
Bv1_020020_dmnk	blue	470.604	PREDICTED: zinc finger CCCH domain-containing protein 48 [Beta vulgaris subsp. vulgaris]	GO:0003677(DNA binding);GO:0005737(cytoplasm);GO:0008150(biological_process);GO:0046872(metal ion binding)	04120(Ubiquitin mediated proteolysis)	K10260	NA	4.81	4.65	4.57	6.81	5.97	7.15	8.12	7.47	7	7.1	7.84	5.84	12.38	11.9	11.17	2.42991e-23	7.46522e-23
Bv5_105560_xcrt	blue	470.325	PREDICTED: YTH domain-containing protein 1 [Beta vulgaris subsp. vulgaris]	GO:0005686(U2 snRNP)	NA	NA	NA	3.8	3.94	5.99	4.21	3.76	4.07	5.77	6.16	4.94	6.93	6.73	7.2	10.66	8.18	9.8	5.96906e-14	1.26124e-13
Bv9_224360_dpwg	blue	469.959	PREDICTED: O-acyltransferase WSD1 isoform X1 [Beta vulgaris subsp. vulgaris]	GO:0004144(diacylglycerol O-acyltransferase activity);GO:0005886(plasma membrane);GO:0019432(triglyceride biosynthetic process);GO:0047196(long-chain-alcohol O-fatty-acyltransferase activity)	00073(Cutin, suberine and wax biosynthesis)	K15406	EC:2.3.1.75;EC:2.3.1.20	10.81	9.88	10.79	72.45	76.37	69.39	86.55	90.82	88.72	154.79	148.77	151.91	228.21	201.34	216.4	0	0
Bv9_206520_irex	blue	469.452	PREDICTED: fasciclin-like arabinogalactan protein 2 [Beta vulgaris subsp. vulgaris]	GO:0005774(vacuolar membrane);GO:0005886(plasma membrane);GO:0016020(membrane);GO:0031225(anchored component of membrane);GO:0046658(anchored component of plasma membrane)	NA	NA	NA	22.13	27.39	22.92	19.77	20.68	17.59	58.51	61.88	50.76	59.24	61.1	55.99	79.39	69.1	79.99	4.72072e-95	5.75505e-94
Bv6_137370_orup	blue	469.293	PREDICTED: lysosomal Pro-X carboxypeptidase [Beta vulgaris subsp. vulgaris]	GO:0004185(serine-type carboxypeptidase activity);GO:0006508(proteolysis);GO:0008239(dipeptidyl-peptidase activity)	NA	NA	NA	6.31	7.76	6.78	14.32	14	14.72	13.76	13.56	14.4	17.98	17.43	18.54	30.11	25.22	27.11	8.23192e-99	1.06488e-97
Bv4_076760_zezf	blue	468.987	PREDICTED: peptide chain release factor PrfB2, chloroplastic [Beta vulgaris subsp. vulgaris]	GO:0016149(translation release factor activity, codon specific);GO:0043022(ribosome binding)	NA	NA	NA	8.01	8.53	10.36	7.61	8.88	10.06	11.63	10.29	11.67	15.34	13.32	10.21	19.78	17.74	17.39	3.67505e-08	5.7815e-08
Bv4_093430_gzyp	blue	468.71	PREDICTED: pumilio homolog 5 [Beta vulgaris subsp. vulgaris]	GO:0003723(RNA binding);GO:0003727(single-stranded RNA binding);GO:0003729(mRNA binding);GO:0005737(cytoplasm);GO:0005773(vacuole);GO:0005829(cytosol);GO:0006970(response to osmotic stress);GO:0009651(response to salt stress);GO:0009819(drought recovery);GO:0051607(defense response to virus);GO:0061158(3'-UTR-mediated mRNA destabilization)	NA	NA	NA	1.4	0.87	1.81	1.33	1.75	2.34	1.04	0.85	0.64	1.91	2.45	1.85	8.73	7.42	9.51	2.54892e-45	1.37609e-44
Bv2_043450_fhqp	blue	468.503	PREDICTED: uncharacterized protein LOC104887719 [Beta vulgaris subsp. vulgaris];hypothetical protein BVRB_2g043450 isoform B [Beta vulgaris subsp. vulgaris]	GO:0003674(molecular_function);GO:0008150(biological_process);GO:0008150(biological_process)	NA	NA	NA	15.55	16.76	16.22	19.17	19.53	17.68	11.79	29.48	30.16	29.28	9.47	31.03	75.68	70.01	72.68	8.33302e-16	1.91818e-15
Bv5_107900_ceni	blue	468.422	hypothetical protein BVRB_5g107900 [Beta vulgaris subsp. vulgaris]	GO:0046654(tetrahydrofolate biosynthetic process);GO:0046820(4-amino-4-deoxychorismate synthase activity)	00790(Folate biosynthesis)	K13950	EC:2.6.1.85	0	0	0	0.08	0	0	0	0	0	0	0	0	4.44	3.08	5.14	1.78052e-54	1.15081e-53
Bv6_154780_awou	blue	468.115	PREDICTED: AMP deaminase-like [Beta vulgaris subsp. vulgaris]	GO:0003876(AMP deaminase activity);GO:0005515(protein binding);GO:0005524(ATP binding);GO:0005634(nucleus);GO:0005783(endoplasmic reticulum);GO:0005829(cytosol);GO:0009168(purine ribonucleoside monophosphate biosynthetic process);GO:0009737(response to abscisic acid);GO:0009793(embryo development ending in seed dormancy);GO:0031307(integral component of mitochondrial outer membrane);GO:0032264(IM…	00230(Purine metabolism)	K01490	EC:3.5.4.6	17.48	21.68	20.57	20.15	19.12	20.26	43.29	43.99	40.07	46.02	46.3	46.81	56.63	55.97	54.82	8.80519e-124	1.51473e-122
Bv8_183270_gofx	blue	467.864	hypothetical protein BVRB_8g183270 [Beta vulgaris subsp. vulgaris]	NA	NA	NA	NA	1.34	2	1.15	2.22	2.56	1.95	10.67	10.54	10.75	9.29	10.26	9.57	15.55	13.38	13.54	6.23949e-63	4.68978e-62
Bv4_071010_giqt	blue	467.761	PREDICTED: uncharacterized protein At1g04910 [Beta vulgaris subsp. vulgaris]	GO:0005737(cytoplasm)	NA	NA	NA	34.31	36.7	36.87	39.92	35.14	38.15	26.51	25.97	21.13	23.65	23.95	23.12	16.87	16.36	14.73	3.95508e-36	1.73242e-35
Bv_004400_rkqw	blue	467.728	PREDICTED: uncharacterized protein LOC104883909 isoform X1 [Beta vulgaris subsp. vulgaris]	GO:0003674(molecular_function);GO:0005634(nucleus);GO:0005777(peroxisome);GO:0008150(biological_process)	NA	NA	NA	0.09	0	0.11	0.74	0.34	0.39	0.58	0.76	0.61	0.36	0.42	0.16	2.09	2.2	2.19	3.18806e-22	9.45852e-22
Bv6_147690_mghj	blue	467.25	PREDICTED: two-component response regulator ARR11 isoform X1 [Beta vulgaris subsp. vulgaris]	GO:0000156(phosphorelay response regulator activity);GO:0000160(phosphorelay signal transduction system);GO:0003677(DNA binding);GO:0003700(DNA binding transcription factor activity);GO:0005515(protein binding);GO:0005634(nucleus);GO:0006351(transcription, DNA-templated);GO:0006355(regulation of transcription, DNA-templated);GO:0009735(response to cytokinin);GO:0009736(cytokinin-activated signali…	04075(Plant hormone signal transduction)	K14491	NA	0.78	0.84	1.1	1.43	1.19	1.19	2.02	2.19	1.82	2.45	2.74	3.36	3.92	3.24	4.26	3.17181e-31	1.23057e-30
Bv8_198890_aytc	blue	467.134	PREDICTED: protein GLUTAMINE DUMPER 3 [Beta vulgaris subsp. vulgaris]	GO:0003674(molecular_function);GO:0005634(nucleus);GO:0006865(amino acid transport);GO:0009615(response to virus);GO:0016021(integral component of membrane);GO:0019048(modulation by virus of host morphology or physiology);GO:0032940(secretion by cell);GO:0080143(regulation of amino acid export)	NA	NA	NA	3.71	3.63	4.15	1.43	0.84	1.27	2.35	4.02	4.1	2.49	3.35	2.95	9.15	9.15	9.79	7.42524e-27	2.54349e-26
Bv4_076670_zpks	blue	465.267	PREDICTED: homeobox protein cut [Beta vulgaris subsp. vulgaris]	GO:0003674(molecular_function);GO:0005634(nucleus);GO:0008150(biological_process)	NA	NA	NA	5.34	5.2	5.48	2.89	2.87	3.22	4.07	4.33	4.21	4.25	4.2	4.33	11.44	13.36	14.24	1.4113e-68	1.16491e-67
Bv3_057500_qfjm	blue	465.185	PREDICTED: B-box zinc finger protein 24 [Beta vulgaris subsp. vulgaris]	GO:0005634(nucleus);GO:0006355(regulation of transcription, DNA-templated);GO:0009640(photomorphogenesis)	NA	NA	NA	13.59	14.32	17.26	16.32	15.93	19.28	77.15	87.34	83.73	99.09	103.49	98.3	137.27	116.62	126.2	8.42305e-284	4.93695e-282
Bv9_222850_ycjc	blue	464.68	PREDICTED: codeine O-demethylase [Beta vulgaris subsp. vulgaris]	GO:0051213(dioxygenase activity)	00941(Flavonoid biosynthesis)	K05278	EC:1.14.20.6	24.25	27.64	24.58	26.49	25.05	26.42	64.94	60.43	58.19	70.22	67.53	65.01	83.83	76.06	85.18	1.1046e-130	2.05544e-129
Bv6_142020_taea	blue	464.27	hypothetical protein BVRB_1g014350 [Beta vulgaris subsp. vulgaris]	NA	NA	NA	NA	0.54	0.7	0.61	0.45	0.19	0.21	1.03	0.41	0.84	1.24	1.36	1.75	2.21	2.28	2.37	7.41198e-14	1.56081e-13
Bv1_015410_neco	blue	464.22	PREDICTED: subtilisin-like protease SBT1.7 [Beta vulgaris subsp. vulgaris]	GO:0004252(serine-type endopeptidase activity);GO:0005618(cell wall)	NA	NA	NA	10.25	10.19	12.57	5.95	5.06	4.97	9.59	9.31	9.07	10.27	11.21	10.15	19.39	18.53	19.67	1.22812e-48	7.14016e-48
Bv5_126580_ykiy	blue	464.036	PREDICTED: coenzyme Q-binding protein COQ10 homolog, mitochondrial [Beta vulgaris subsp. vulgaris]	GO:0003674(molecular_function);GO:0005739(mitochondrion);GO:0006744(ubiquinone biosynthetic process);GO:0008150(biological_process)	NA	NA	NA	1.58	2.19	1.99	2.24	1.82	1.43	2.46	2.75	2.37	2.89	2.5	2.08	4.35	3.74	3.61	1.99677e-08	3.19433e-08
Bv8_197940_suzn	blue	463.835	PREDICTED: gamma-glutamyltranspeptidase 3 isoform X1 [Beta vulgaris subsp. vulgaris]	GO:0005773(vacuole);GO:0005774(vacuolar membrane);GO:0006508(proteolysis);GO:0006751(glutathione catabolic process);GO:0006805(xenobiotic metabolic process);GO:0009636(response to toxic substance);GO:0016021(integral component of membrane);GO:0016756(glutathione gamma-glutamylcysteinyltransferase activity);GO:0036374(glutathione hydrolase activity);GO:0102953(hypoglycin A gamma-glutamyl transpept…	00590(Arachidonic acid metabolism);00430(Taurine and hypotaurine metabolism);00460(Cyanoamino acid metabolism);00480(Glutathione metabolism)	K18592	EC:2.3.2.2;EC:3.4.19.13	30.58	34.04	32.18	51.24	48.48	51.08	63.6	66.84	68.33	78.63	73.34	74.66	97.82	86.52	93.19	4.87025e-79	4.79144e-78
Bv2_039510_hywu	blue	463.635	PREDICTED: protein C2-DOMAIN ABA-RELATED 1-like [Beta vulgaris subsp. vulgaris]	GO:0005096(GTPase activator activity);GO:0005515(protein binding);GO:0005543(phospholipid binding);GO:0005634(nucleus);GO:0005829(cytosol);GO:0005886(plasma membrane);GO:0006952(defense response);GO:0009651(response to salt stress);GO:0009738(abscisic acid-activated signaling pathway);GO:0009789(positive regulation of abscisic acid-activated signaling pathway);GO:0046872(metal ion binding);GO:190…	NA	NA	NA	2.19	3.2	2.86	0.94	0.49	0.44	3.84	3.89	3.39	1.84	2.04	1.34	9.93	7.57	10.27	1.25822e-58	8.79924e-58
Bv8_182040_csfp	blue	463.31	hypothetical protein BVRB_8g182040 isoform A [Beta vulgaris subsp. vulgaris];hypothetical protein BVRB_8g182040 isoform B [Beta vulgaris subsp. vulgaris]	NA	NA	NA	NA	3.04	3.74	3.5	1.96	1.88	2.02	4.54	5.58	4.68	6.64	5.84	6.14	9.93	8.05	7.44	3.13743e-27	1.08546e-26
Bv1_006750_ogru	blue	463.301	PREDICTED: BEL1-like homeodomain protein 11 [Beta vulgaris subsp. vulgaris]	GO:0003677(DNA binding);GO:0003700(DNA binding transcription factor activity);GO:0005634(nucleus);GO:0006351(transcription, DNA-templated);GO:0006355(regulation of transcription, DNA-templated)	NA	NA	NA	14.18	16.9	15.95	6.33	5.8	5.54	13.83	14.93	11.95	14.84	15.02	13.52	30.68	27.32	28.39	5.2277e-66	4.15308e-65
Bv9_224730_wkzj	blue	462.981	PREDICTED: clavaminate synthase-like protein At3g21360 [Beta vulgaris subsp. vulgaris]	GO:0005634(nucleus);GO:0016491(oxidoreductase activity);GO:0046872(metal ion binding);GO:0055114(oxidation-reduction process)	NA	NA	NA	75.53	80.92	83.68	105.71	123.13	113.5	178.55	175.94	180.13	140.71	149.62	151.8	226.16	204.97	231.42	3.55876e-70	3.02629e-69
Bv4_096590_tirp	blue	462.954	hypothetical protein BVRB_4g096590 [Beta vulgaris subsp. vulgaris]	GO:0004842(ubiquitin-protein transferase activity);GO:0019005(SCF ubiquitin ligase complex);GO:0031146(SCF-dependent proteasomal ubiquitin-dependent protein catabolic process)	NA	NA	NA	1.79	2.05	1.83	1.05	1.06	0.89	3.77	3.22	3.37	2.56	2.44	2.7	4.38	5.78	5.83	1.30142e-59	9.2451e-59
Bv_006850_gcqz	blue	462.937	PREDICTED: ethylene-responsive transcription factor RAP2-3 [Beta vulgaris subsp. vulgaris]	GO:0003677(DNA binding);GO:0003700(DNA binding transcription factor activity);GO:0005515(protein binding);GO:0005634(nucleus);GO:0005737(cytoplasm);GO:0005886(plasma membrane);GO:0006351(transcription, DNA-templated);GO:0006355(regulation of transcription, DNA-templated);GO:0008219(cell death);GO:0009723(response to ethylene);GO:0009735(response to cytokinin);GO:0009753(response to jasmonic acid)…	NA	NA	NA	7.77	9.91	10.21	11.61	11.02	10.59	12.99	11.76	12.73	31.42	29.54	31.34	47.22	39.49	43.45	2.41207e-189	7.38142e-188
Bv1_016640_jpjp	blue	462.867	hypothetical protein BVRB_1g016640 [Beta vulgaris subsp. vulgaris]	GO:0005634(nucleus);GO:0005737(cytoplasm);GO:0008146(sulfotransferase activity);GO:0009812(flavonoid metabolic process);GO:0016787(hydrolase activity);GO:1990135(flavonoid sulfotransferase activity)	NA	NA	NA	8.22	7.92	7.58	3.82	3.46	4.14	14.5	15.88	13.49	17.76	17.86	16.04	20.89	27.05	23.85	1.64859e-100	2.17324e-99
Bv9_207340_gwwz	blue	462.57	hypothetical protein BVRB_9g207340 [Beta vulgaris subsp. vulgaris]	GO:0004672(protein kinase activity);GO:0004707(MAP kinase activity);GO:0005515(protein binding);GO:0005524(ATP binding);GO:0005634(nucleus);GO:0005737(cytoplasm);GO:0006468(protein phosphorylation);GO:0006970(response to osmotic stress);GO:0006979(response to oxidative stress);GO:0007165(signal transduction);GO:0009409(response to cold);GO:0009555(pollen development);GO:0009611(response to woundi…	04016(MAPK signaling pathway - plant)	K20536	EC:2.7.11.24	189.4	200.39	211.54	273.63	271.4	279.11	133.17	135.45	128.41	136.72	137.32	140.04	52.58	51.56	47.45	2.21209e-182	6.43044e-181
Bv4_093980_hrrf	blue	462.554	PREDICTED: cytochrome P450 72A15 [Beta vulgaris subsp. vulgaris]	GO:0004497(monooxygenase activity)	NA	NA	NA	6.06	6.32	6.28	15.27	16.11	15.41	15.82	16.71	16.29	26.18	25.77	23.53	36.16	33.29	35.19	2.95561e-210	1.03873e-208
Bv7_172470_unsc	blue	462.467	PREDICTED: uncharacterized protein LOC104899983 [Beta vulgaris subsp. vulgaris]	GO:0006396(RNA processing);GO:0009507(chloroplast)	NA	NA	NA	108.83	121.7	120.25	34.28	37.7	34.42	149.43	146.3	135.9	78.87	77.36	75.43	311.83	298.13	301.68	1.04365e-188	3.18296e-187
Bv9_211620_xusp	blue	462.418	hypothetical protein BVRB_9g211620 [Beta vulgaris subsp. vulgaris]	NA	NA	NA	NA	0.33	0.39	0	0.12	0.13	0	1.71	0.32	0.63	2.49	1.52	2	3.98	2.83	3.52	7.35278e-12	1.40841e-11
Bv4_089000_gncs	blue	461.597	PREDICTED: uncharacterized protein LOC104891735 [Beta vulgaris subsp. vulgaris]	GO:0005634(nucleus);GO:0016021(integral component of membrane)	NA	NA	NA	1.26	1.15	1.28	2.59	3.22	3.72	2.81	3.29	1.93	3.92	4.07	4.4	11.08	8.05	8.2	2.01128e-36	8.8747e-36
Bv6_138790_oktq	blue	461.583	PREDICTED: RING-H2 finger protein ATL52 [Beta vulgaris subsp. vulgaris]	GO:0043161(proteasome-mediated ubiquitin-dependent protein catabolic process);GO:0061630(ubiquitin protein ligase activity)	NA	NA	NA	30.25	34.37	33.2	30.54	33.05	32.37	14.53	14.64	14.68	18.94	19.16	16.69	7.31	8.54	8	1.8977e-142	3.966e-141
Bv3_060180_zcmm	blue	461.22	hypothetical protein BVRB_3g060180 [Beta vulgaris subsp. vulgaris]	NA	NA	NA	NA	0.57	0.67	0.63	0.29	0.37	0.19	2.31	1.64	1.98	1.13	0.95	1.31	3.21	2.55	3.43	3.72327e-28	1.33035e-27
Bv2_047480_nrwu	blue	461.003	PREDICTED: crossover junction endonuclease MUS81 isoform X1 [Beta vulgaris subsp. vulgaris];hypothetical protein BVRB_2g047480 isoform B [Beta vulgaris subsp. vulgaris];hypothetical protein BVRB_2g047480 isoform C [Beta vulgaris subsp. vulgaris];hypothetical protein BVRB_2g047480 isoform E [Beta vulgaris subsp. vulgaris]	GO:0000712(resolution of meiotic recombination intermediates);GO:0000724(double-strand break repair via homologous recombination);GO:0000727(double-strand break repair via break-induced replication);GO:0000794(condensed nuclear chromosome);GO:0003676(nucleic acid binding);GO:0003677(DNA binding);GO:0004519(endonuclease activity);GO:0005634(nucleus);GO:0005730(nucleolus);GO:0006281(DNA repair);GO:…	03440(Homologous recombination);03440(Homologous recombination)	K08991	EC:3.1.22.-	34.03	34.68	37.51	30.72	27.83	29.55	36.39	35.09	38.88	59.23	60.85	46.41	71.92	70.12	74.81	3.02349e-47	1.70334e-46
Bv9_223310_mifr	blue	460.685	PREDICTED: plasma membrane ATPase isoform X1 [Beta vulgaris subsp. vulgaris]	GO:0005887(integral component of plasma membrane);GO:0008553(proton-exporting ATPase activity, phosphorylative mechanism);GO:0043231(intracellular membrane-bounded organelle);GO:0051453(regulation of intracellular pH);GO:1902600(proton transmembrane transport)	00190(Oxidative phosphorylation)	K01535	EC:3.6.3.6	0	0	0.65	0.66	0.56	1.34	5.14	3.98	1.67	8.46	7.05	9.37	12.99	12.56	10.75	2.17273e-26	7.33649e-26
Bv1_004340_twtp	blue	460.534	PREDICTED: uncharacterized protein LOC104887174 isoform X1 [Beta vulgaris subsp. vulgaris]	GO:0005886(plasma membrane)	NA	NA	NA	6.77	7.75	7.78	6.85	6.72	7.51	15.2	17.73	15.3	18.35	18.26	16.27	22.79	19.3	22.66	3.35363e-53	2.11812e-52
Bv3_069930_zsar	blue	460.218	PREDICTED: nuclear transcription factor Y subunit C-2 [Beta vulgaris subsp. vulgaris]	GO:0003677(DNA binding);GO:0003700(DNA binding transcription factor activity);GO:0003712(transcription cofactor activity);GO:0005515(protein binding);GO:0005634(nucleus);GO:0005829(cytosol);GO:0006351(transcription, DNA-templated);GO:0006355(regulation of transcription, DNA-templated);GO:0009738(abscisic acid-activated signaling pathway);GO:0009740(gibberellic acid mediated signaling pathway);GO:…	NA	NA	NA	0.08	0.29	0.49	0.49	0.55	0.29	2.58	1.29	1.95	2.44	2.35	1.67	5.25	4.33	3.05	4.34733e-22	1.28513e-21
Bv2_041160_oudr	blue	460.105	PREDICTED: basic blue protein [Beta vulgaris subsp. vulgaris]	GO:0046658(anchored component of plasma membrane)	NA	NA	NA	3.09	3.6	2.95	6.95	6.58	7.48	8.95	9.02	9.13	10.22	10.69	11.52	14.35	14.12	14.52	4.01751e-73	3.61817e-72
Bv1_003320_qfuz	blue	459.533	PREDICTED: abscisic acid receptor PYL9 [Beta vulgaris subsp. vulgaris]	GO:0004864(protein phosphatase inhibitor activity);GO:0005634(nucleus);GO:0005737(cytoplasm);GO:0009738(abscisic acid-activated signaling pathway);GO:0010427(abscisic acid binding);GO:0080163(regulation of protein serine/threonine phosphatase activity)	04016(MAPK signaling pathway - plant);04075(Plant hormone signal transduction)	K14496	NA	34.11	38.11	38.43	36.21	33.57	32.43	27.62	29	26.89	43.44	43.5	43.13	84.29	72.94	77.43	1.00962e-81	1.03339e-80
Bv5_117200_jrak	blue	459.207	PREDICTED: probable boron transporter 2 [Beta vulgaris subsp. vulgaris]	GO:0005887(integral component of plasma membrane);GO:0008509(anion transmembrane transporter activity);GO:0051453(regulation of intracellular pH);GO:0098656(anion transmembrane transport)	NA	NA	NA	15.47	15.27	14.65	15.69	16.56	15.34	36.32	33.03	37.86	30.89	30.07	26.65	45.43	39.75	44.28	1.77263e-76	1.6832e-75
Bv6_133860_geha	blue	458.207	PREDICTED: uncharacterized protein LOC104895521 [Beta vulgaris subsp. vulgaris]	GO:0008150(biological_process);GO:0016021(integral component of membrane)	NA	NA	NA	3.36	3.87	3.67	4.43	4.74	4.58	4.31	4.03	4.41	4.56	4.79	4.9	6.71	7.31	8.02	7.91743e-14	1.66491e-13
Bv5_100210_gzks	blue	457.921	PREDICTED: BTB/POZ domain-containing protein At1g63850 [Beta vulgaris subsp. vulgaris]	GO:0005634(nucleus);GO:0016567(protein ubiquitination)	NA	NA	NA	17.62	22.08	23.62	13.64	12	10.95	27.51	29.39	27.13	19.03	17.85	19.97	44.7	42.16	45.73	2.06703e-79	2.04476e-78
Bv2_043190_eqpd	blue	457.407	hypothetical protein BVRB_2g043190 [Beta vulgaris subsp. vulgaris]	GO:0005515(protein binding);GO:0005524(ATP binding);GO:0005576(extracellular region);GO:0006952(defense response);GO:0043531(ADP binding)	NA	NA	NA	5.19	5.64	5.57	2.53	2.15	2.32	4.83	5.02	4.15	3.77	3.42	3.38	14.83	11.76	15.09	4.39986e-95	5.36754e-94
Bv5_126860_jrqp	blue	457.215	PREDICTED: uncharacterized protein LOC104908337 isoform X1 [Beta vulgaris subsp. vulgaris];hypothetical protein BVRB_5g126860 isoform B [Beta vulgaris subsp. vulgaris]	GO:0003674(molecular_function);GO:0005575(cellular_component);GO:0008150(biological_process);GO:0008150(biological_process)	NA	NA	NA	2.22	2.49	2.61	1.83	1.89	1.6	3.42	2.64	2.65	3.77	4.94	4.91	6.63	5.43	7.92	1.08042e-22	3.25918e-22
Bv5_109930_mrpd	blue	457.034	PREDICTED: double-stranded RNA-binding protein 1 [Beta vulgaris subsp. vulgaris]	GO:0003725(double-stranded RNA binding);GO:0005515(protein binding);GO:0005634(nucleus);GO:0005737(cytoplasm);GO:0010267(production of ta-siRNAs involved in RNA interference);GO:0016032(viral process);GO:0035196(production of miRNAs involved in gene silencing by miRNA);GO:0051607(defense response to virus);GO:0060145(viral gene silencing in virus induced gene silencing);GO:0070919(production of s…	00270(Cysteine and methionine metabolism);00450(Selenocompound metabolism)	K00549	EC:2.1.1.14	4.98	5.65	6.53	5.42	3.72	4.71	8.25	7.26	7.73	9.31	9.68	8.93	12.31	10.04	12.04	7.2831e-21	2.0554e-20
Bv5_098280_xpuu	blue	457.006	PREDICTED: primary amine oxidase [Beta vulgaris subsp. vulgaris]	GO:0005507(copper ion binding);GO:0005576(extracellular region);GO:0005768(endosome);GO:0005773(vacuole);GO:0005794(Golgi apparatus);GO:0005802(trans-Golgi network);GO:0008131(primary amine oxidase activity);GO:0016021(integral component of membrane);GO:0048038(quinone binding);GO:0055114(oxidation-reduction process)	00260(Glycine, serine and threonine metabolism);00350(Tyrosine metabolism);00360(Phenylalanine metabolism);00410(beta-Alanine metabolism);00950(Isoquinoline alkaloid biosynthesis);00960(Tropane, piperidine and pyridine alkaloid biosynthesis)	K00276	EC:1.4.3.21	2.58	3.03	4.2	12.88	13.99	14.89	105.68	108.13	105.68	75.08	72.85	73.86	140.2	128.1	140.31	0	0
Bv5_119570_yood	blue	456.536	PREDICTED: uncharacterized protein LOC104894524 [Beta vulgaris subsp. vulgaris]	NA	NA	NA	NA	7.05	9.75	8.2	30.34	41.03	39.67	69.7	65.44	65.15	86.07	84.76	82.94	120.04	104.01	107.11	8.43701e-228	3.39632e-226
Bv9_221780_cyty	blue	456.198	PREDICTED: uncharacterized protein LOC104904752 [Beta vulgaris subsp. vulgaris]	GO:0003674(molecular_function);GO:0005634(nucleus);GO:0008150(biological_process)	NA	NA	NA	2.86	3.82	3.4	1.36	1.52	1.84	1.56	2.6	1	3.9	5.68	5.51	9.91	11.26	12.26	1.31569e-21	3.82216e-21
Bv7_164450_fttt	blue	455.889	PREDICTED: BTB/POZ domain-containing protein At1g03010 isoform X2 [Beta vulgaris subsp. vulgaris];PREDICTED: BTB/POZ domain-containing protein At1g03010 isoform X1 [Beta vulgaris subsp. vulgaris]	GO:0005886(plasma membrane);GO:0009416(response to light stimulus);GO:0009860(pollen tube growth);GO:0016567(protein ubiquitination);GO:0016567(protein ubiquitination)	03050(Proteasome);03050(Proteasome)	K03063	NA	7.82	9.82	7.44	6.72	6.92	6.85	7.53	8.83	9.13	11.85	8.99	9.16	16.84	17.94	23.65	5.03388e-15	1.11882e-14
Bv5_099570_iios	blue	455.887	PREDICTED: uncharacterized protein LOC104892210 isoform X1 [Beta vulgaris subsp. vulgaris]	NA	NA	NA	NA	2.11	2.24	1.89	1.46	1.42	1.59	2.97	3.21	3.47	3.22	2.61	2.83	4.13	3.92	5.04	2.15792e-20	5.99036e-20
Bv9_212460_tcmr	blue	455.498	PREDICTED: probable serine/threonine-protein kinase Cx32, chloroplastic [Beta vulgaris subsp. vulgaris]	GO:0004675(transmembrane receptor protein serine/threonine kinase activity);GO:0005524(ATP binding);GO:0005634(nucleus);GO:0005886(plasma membrane);GO:0006468(protein phosphorylation);GO:0006952(defense response);GO:0007166(cell surface receptor signaling pathway);GO:0009507(chloroplast);GO:0016301(kinase activity)	NA	NA	NA	131.4	149.72	161.18	168.34	166.07	170.26	87.9	96.56	92.99	107.83	99.83	101.62	61.99	52.39	56.12	6.19239e-81	6.26692e-80
Bv5_122490_gtzu	blue	455.392	PREDICTED: galactinol synthase 1 [Beta vulgaris subsp. vulgaris]	GO:0005737(cytoplasm);GO:0006012(galactose metabolic process);GO:0006979(response to oxidative stress);GO:0009408(response to heat);GO:0009409(response to cold);GO:0009414(response to water deprivation);GO:0009644(response to high light intensity);GO:0009651(response to salt stress);GO:0009737(response to abscisic acid);GO:0016051(carbohydrate biosynthetic process);GO:0016758(transferase activity…	00052(Galactose metabolism)	K18819	EC:2.4.1.123	0.84	1.45	1.69	9.89	9.75	9.24	5.02	5.72	4.51	6.84	6.56	7.09	32.69	29.92	30.95	1.52625e-187	4.59254e-186
Bv8_185230_yuuh	blue	455.293	PREDICTED: uncharacterized protein LOC104900923 [Beta vulgaris subsp. vulgaris]	GO:0005739(mitochondrion);GO:0016021(integral component of membrane)	NA	NA	NA	6.96	7.38	6.02	8.04	11.06	9.31	31.36	34.5	35.12	52.46	52.76	42.6	60.62	59.31	60.97	9.03334e-148	1.99933e-146
Bv8_199830_hjkp	blue	455.287	PREDICTED: calmodulin-binding protein 60 B isoform X1 [Beta vulgaris subsp. vulgaris]	GO:0003677(DNA binding);GO:0005516(calmodulin binding);GO:0005634(nucleus);GO:0006351(transcription, DNA-templated);GO:0006355(regulation of transcription, DNA-templated);GO:0006950(response to stress);GO:0006950(response to stress)	NA	NA	NA	348.23	417.8	417.98	366.62	372.14	398.44	282.38	273.87	271.31	341.38	324.73	333.76	189.61	166.54	192.61	4.3758e-16	1.02204e-15
Bv2_040300_xrpk	blue	455.054	PREDICTED: mannose/glucose-specific lectin [Beta vulgaris subsp. vulgaris]	GO:0000771(agglutination involved in conjugation);GO:0005536(glucose binding);GO:0005537(mannose binding);GO:0005575(cellular_component)	NA	NA	NA	386.66	415.91	422.68	1027.17	1023.88	1107.31	2314.46	2380.41	2464.47	2351.97	2475.07	2446.11	3217.54	3073.38	3355.91	2.95084e-31	1.14582e-30
Bv_009610_gxwx	blue	455.052	PREDICTED: MAR-binding filament-like protein 1 isoform X1 [Beta vulgaris subsp. vulgaris]	GO:0003674(molecular_function);GO:0008150(biological_process);GO:0009507(chloroplast)	NA	NA	NA	11.92	15.67	15.94	31.42	32.87	31.79	51.47	50.85	49.51	52.87	53.04	57.32	72.12	67.92	72.47	2.6273e-125	4.60328e-124
Bv2_038160_iwcd	blue	454.627	PREDICTED: protein FAM133B [Beta vulgaris subsp. vulgaris]	GO:0003674(molecular_function);GO:0005634(nucleus);GO:0048467(gynoecium development);GO:0071365(cellular response to auxin stimulus)	NA	NA	NA	2.63	3.08	3.83	3.31	3.84	4.1	3.81	3.46	3.47	5.61	5.68	5.82	8.32	7.53	7.48	1.08736e-24	3.48831e-24
Bv7_172560_dmez	blue	454.28	hypothetical protein BVRB_7g172560 [Beta vulgaris subsp. vulgaris]	NA	NA	NA	NA	22.06	17.81	20.97	8.94	8.89	8.3	60.03	54.28	53.93	50.38	43.33	36.53	89.6	67.68	73.48	5.2447e-110	7.79943e-109
Bv3_051100_msua	blue	454.08	PREDICTED: syntaxin-121-like [Beta vulgaris subsp. vulgaris]	GO:0000149(SNARE binding);GO:0005484(SNAP receptor activity);GO:0005515(protein binding);GO:0005802(trans-Golgi network);GO:0005886(plasma membrane);GO:0006612(protein targeting to membrane);GO:0006886(intracellular protein transport);GO:0006887(exocytosis);GO:0006906(vesicle fusion);GO:0006952(defense response);GO:0009504(cell plate);GO:0009506(plasmodesma);GO:0009620(response to fungus);GO:0009…	04130(SNARE interactions in vesicular transport)	K08486	NA	18.87	20.17	16.07	19.34	24	21.26	16.17	17.3	15.72	17.03	19.8	19.35	7.06	6.37	6.43	1.59619e-55	1.04939e-54
Bv8_200860_anyg	blue	453.215	PREDICTED: transcription factor GTE12-like isoform X1 [Beta vulgaris subsp. vulgaris]	GO:0009813(flavonoid biosynthetic process);GO:0043231(intracellular membrane-bounded organelle);GO:0052696(flavonoid glucuronidation);GO:0080043(quercetin 3-O-glucosyltransferase activity);GO:0080044(quercetin 7-O-glucosyltransferase activity)	NA	NA	NA	16.67	18.56	19.26	21.89	17.6	19.27	21.85	16.64	18.06	18.12	20	22.45	36.4	34.55	40.42	2.05788e-17	5.09276e-17
Bv8_186490_ceud	blue	453.131	PREDICTED: F-box protein CPR30 [Beta vulgaris subsp. vulgaris]	GO:0004842(ubiquitin-protein transferase activity);GO:0019005(SCF ubiquitin ligase complex);GO:0031146(SCF-dependent proteasomal ubiquitin-dependent protein catabolic process)	NA	NA	NA	4.84	7.21	4.6	6.47	6.51	6.8	10.75	10.55	11.65	10.42	12.52	9.72	15.17	12.69	16.26	3.33721e-13	6.82151e-13
Bv2_026150_jwjz	blue	453.068	hypothetical protein BVRB_2g026150 [Beta vulgaris subsp. vulgaris]	NA	NA	NA	NA	0.08	0.15	0.03	0.11	0.22	0.1	0.11	0.07	0.12	0.05	0.03	0	1.15	1.06	1.28	1.52493e-21	4.41718e-21
Bv1_016700_orqr	blue	452.84	PREDICTED: flavonol sulfotransferase-like [Beta vulgaris subsp. vulgaris]	GO:0005737(cytoplasm);GO:0008146(sulfotransferase activity);GO:0009507(chloroplast);GO:0009694(jasmonic acid metabolic process);GO:0009753(response to jasmonic acid);GO:0080131(hydroxyjasmonate sulfotransferase activity)	NA	NA	NA	0.77	1.11	0.87	0.76	0.59	0.92	1.15	1.36	1.05	1.44	0.95	1.13	2.35	1.77	1.97	9.06529e-08	1.39539e-07
Bv8_194830_zidu	blue	452.472	PREDICTED: uncharacterized protein LOC104902069 [Beta vulgaris subsp. vulgaris]	GO:0003777(microtubule motor activity);GO:0005737(cytoplasm);GO:0005868(cytoplasmic dynein complex);GO:0005875(microtubule associated complex);GO:0007017(microtubule-based process);GO:0030286(dynein complex)	NA	NA	NA	8.05	5.95	5.86	0	0.95	1.01	5.33	5.21	3.64	2.87	2.32	3.79	22.87	28.48	28.04	2.387e-54	1.54004e-53
Bv9_202850_cemy	blue	452.374	PREDICTED: uncharacterized protein LOC104902564 [Beta vulgaris subsp. vulgaris]	GO:0006457(protein folding);GO:0009507(chloroplast)	NA	NA	NA	23.44	24.17	27.27	28.52	31.88	30.65	358.19	359.39	346.09	262.08	266.75	280.22	462.81	424.26	460.62	0	0
Bv6_138940_rurs	blue	452.318	PREDICTED: zinc-finger homeodomain protein 1 [Beta vulgaris subsp. vulgaris]	GO:0003677(DNA binding);GO:0003700(DNA binding transcription factor activity);GO:0005515(protein binding);GO:0005634(nucleus);GO:0006351(transcription, DNA-templated);GO:0006355(regulation of transcription, DNA-templated);GO:0009793(embryo development ending in seed dormancy);GO:0042803(protein homodimerization activity);GO:0046872(metal ion binding)	NA	NA	NA	1.39	1.95	2.25	2.08	2.27	2.04	2.39	2.46	2.62	2.7	3.08	2.05	3.91	4.01	3.77	4.2416e-09	7.04479e-09
Bv1_016180_pewc	blue	452.22	PREDICTED: probable alkaline/neutral invertase B [Beta vulgaris subsp. vulgaris]	GO:0004564(beta-fructofuranosidase activity);GO:0004575(sucrose alpha-glucosidase activity);GO:0005634(nucleus);GO:0005829(cytosol);GO:0005975(carbohydrate metabolic process);GO:0033926(glycopeptide alpha-N-acetylgalactosaminidase activity)	03010(Ribosome)	K02986	NA	53.65	62.48	61.47	85.15	75.93	86.13	60.73	58.08	63.86	66.64	65.52	66.14	21.28	19.43	20.83	2.02386e-99	2.63702e-98
Bv8_199660_nhpk	blue	452.191	PREDICTED: endonuclease 4 [Beta vulgaris subsp. vulgaris]	GO:0000014(single-stranded DNA endodeoxyribonuclease activity);GO:0003676(nucleic acid binding);GO:0004519(endonuclease activity);GO:0005576(extracellular region);GO:0006308(DNA catabolic process);GO:0043765(T/G mismatch-specific endonuclease activity)	NA	NA	NA	21.57	20.33	22.95	44.13	40.39	43.91	55.31	53.46	55.08	64.75	60.81	58.67	79.79	79.01	81.83	4.45545e-113	6.90537e-112
Bv9_213330_rxed	blue	451.721	PREDICTED: (RS)-norcoclaurine 6-O-methyltransferase [Beta vulgaris subsp. vulgaris]	GO:0005829(cytosol);GO:0008171(O-methyltransferase activity);GO:0008757(S-adenosylmethionine-dependent methyltransferase activity);GO:0019438(aromatic compound biosynthetic process)	00945(Stilbenoid, diarylheptanoid and gingerol biosynthesis)	K16040	EC:2.1.1.240	0.31	0.96	0.96	0.24	0.76	0.45	0.64	0.13	0.72	0.59	0.8	1.07	6.04	4.79	4.08	9.68212e-14	2.02888e-13
Bv_015550_cwtn	blue	451.528	PREDICTED: protein LURP-one-related 11-like [Beta vulgaris subsp. vulgaris]	GO:0006952(defense response)	03013(RNA transport)	K03239	NA	17.72	21.54	22.21	27.46	25.35	24.38	18.5	20.21	19.68	28.3	28.13	27.65	50.82	46.46	49.59	1.04838e-49	6.23208e-49
Bv3_062170_fuhi	blue	451.211	PREDICTED: uncharacterized protein LOC104889416 [Beta vulgaris subsp. vulgaris]	GO:0005737(cytoplasm);GO:0005886(plasma membrane);GO:0008270(zinc ion binding);GO:0016021(integral component of membrane)	04141(Protein processing in endoplasmic reticulum)	K10661	EC:2.3.2.27	8.69	11.21	10.01	10.7	13.36	16.19	12.47	13.13	12.52	14.26	14.22	14.29	22.88	24.68	23.88	7.53987e-16	1.74006e-15
Bv6_154260_eezf	blue	451.027	PREDICTED: uncharacterized protein LOC104897945 [Beta vulgaris subsp. vulgaris]	GO:0003674(molecular_function);GO:0005634(nucleus);GO:0008150(biological_process)	NA	NA	NA	17.89	20.19	18.09	53.98	52.3	49.25	50.03	53.76	45.41	52.97	53	45.79	104.06	106.32	101.09	1.61266e-141	3.34696e-140
Bv3_058890_inpc	blue	450.64	PREDICTED: acyl-coenzyme A thioesterase 9, mitochondrial [Beta vulgaris subsp. vulgaris]	GO:0005739(mitochondrion);GO:0008150(biological_process);GO:0016788(hydrolase activity, acting on ester bonds);GO:0016853(isomerase activity);GO:0047617(acyl-CoA hydrolase activity)	NA	NA	NA	4.45	5.71	4.85	6.48	5.86	7.98	12.6	12.63	10.57	10.84	11.15	11.92	15.58	14.18	15.08	5.33535e-36	2.33133e-35
Bv3_068610_iiyf	blue	450.574	PREDICTED: F-box/kelch-repeat protein At2g44130 [Beta vulgaris subsp. vulgaris]	GO:0004842(ubiquitin-protein transferase activity);GO:0031463(Cul3-RING ubiquitin ligase complex)	NA	NA	NA	11.88	12.51	10.61	5.08	4.96	5.17	7.37	9.08	7.53	8.62	11.24	10.42	22.55	23.63	25.3	1.5412e-70	1.31933e-69
Bv6_137090_ugit	blue	450.35	PREDICTED: chitotriosidase-1 [Beta vulgaris subsp. vulgaris]	GO:0004568(chitinase activity);GO:0005576(extracellular region);GO:0006032(chitin catabolic process);GO:0008061(chitin binding)	00520(Amino sugar and nucleotide sugar metabolism)	K01183	EC:3.2.1.14	3.89	5.15	4.67	18.76	21.1	21.7	10.15	7.67	9.48	28.99	27.33	27.56	66.26	59.25	60.78	1.34293e-245	6.16447e-244
Bv4_090490_zpji	blue	450.203	PREDICTED: NAD-dependent protein deacetylase SRT1 isoform X1 [Beta vulgaris subsp. vulgaris];hypothetical protein BVRB_4g090490 isoform C [Beta vulgaris subsp. vulgaris];PREDICTED: NAD-dependent protein deacetylase SRT1 isoform X2 [Beta vulgaris subsp. vulgaris]	GO:0003677(DNA binding);GO:0005634(nucleus);GO:0005677(chromatin silencing complex);GO:0005737(cytoplasm);GO:0006342(chromatin silencing);GO:0006355(regulation of transcription, DNA-templated);GO:0016787(hydrolase activity);GO:0046872(metal ion binding);GO:0070403(NAD+ binding);GO:0070403(NAD+ binding)	NA	NA	NA	1.42	2.23	2.43	1.42	1.32	0.97	2.1	2.17	1.94	2.96	3.07	3.53	4.88	4.01	4.6	2.84769e-19	7.58793e-19
Bv6_145280_uqep	blue	449.924	PREDICTED: DNA topoisomerase 6 subunit B isoform X1 [Beta vulgaris subsp. vulgaris]	GO:0005829(cytosol);GO:0006412(translation);GO:0015935(small ribosomal subunit);GO:0042254(ribosome biogenesis)	NA	NA	NA	1.65	2.46	1.48	2.13	1.54	1.27	3.62	4.08	3.77	5.45	5.01	4.48	6.75	6.77	5.54	1.7755e-18	4.58764e-18
Bv8_196040_cern	blue	449.813	PREDICTED: probable sulfate transporter 3.4 [Beta vulgaris subsp. vulgaris]	GO:0005887(integral component of plasma membrane);GO:0015116(sulfate transmembrane transporter activity)	NA	NA	NA	162.02	186.5	183.75	231.06	218.08	222.78	303.85	305.85	298.26	253.85	241.97	238.44	383.15	352.14	372.15	1.24453e-22	3.74544e-22
Bv1_009410_xxqn	blue	449.801	PREDICTED: TPR repeat-containing thioredoxin TTL1 [Beta vulgaris subsp. vulgaris]	GO:0005634(nucleus);GO:0006970(response to osmotic stress);GO:0009651(response to salt stress);GO:0009737(response to abscisic acid);GO:0009738(abscisic acid-activated signaling pathway);GO:0009789(positive regulation of abscisic acid-activated signaling pathway);GO:0045454(cell redox homeostasis)	NA	NA	NA	2.69	2.42	3.23	5.33	6.13	5.4	3.3	4.42	4.21	3.61	3.37	3.15	20.3	19.06	18.88	2.10365e-139	4.30148e-138
Bv5_119450_qjrg	blue	449.517	PREDICTED: GATA zinc finger domain-containing protein 14 [Beta vulgaris subsp. vulgaris]	GO:0003674(molecular_function);GO:0005634(nucleus)	NA	NA	NA	57.62	67.14	57.82	25.9	30.86	25.85	79.1	82.13	71.99	30.78	29.68	25.83	200.83	197.27	210.34	1.65164e-259	8.39535e-258
Bv6_140120_tzop	blue	449.484	PREDICTED: protein ABHD17B [Beta vulgaris subsp. vulgaris]	GO:0005634(nucleus);GO:0016787(hydrolase activity)	NA	NA	NA	3.5	2.56	3.4	3.83	2.62	3.43	12.59	10.56	11.16	12.52	11.28	12.02	15.57	15.57	14.99	1.16398e-66	9.31287e-66
Bv7_169390_ykhy	blue	449.218	hypothetical protein BVRB_7g169390 [Beta vulgaris subsp. vulgaris]	GO:0016412(serine O-acyltransferase activity)	NA	NA	NA	30.74	34.15	31.53	21.8	23.67	23.71	6.31	5.51	4.75	31.81	40.32	32.19	158.28	136.27	138.63	0	0
Bv9_203540_koap	blue	448.929	PREDICTED: uncharacterized protein LOC104902629 [Beta vulgaris subsp. vulgaris]	NA	NA	NA	NA	6.76	7.82	6.67	8.06	7.84	7.82	6.99	8.7	7.7	6.59	8.98	7.39	13.84	13.82	15.28	1.19111e-11	2.25846e-11
Bv3_060320_rqad	blue	448.233	PREDICTED: non-structural maintenance of chromosomes element 4 homolog A [Beta vulgaris subsp. vulgaris]	GO:0003674(molecular_function);GO:0005634(nucleus);GO:0006281(DNA repair);GO:0006310(DNA recombination);GO:0030915(Smc5-Smc6 complex)	NA	NA	NA	2.34	2.38	2.61	1.89	1.23	0.75	2.4	2.2	1.68	2.54	2.78	2.58	6.2	4.34	6.33	5.80386e-13	1.17132e-12
Bv5_126680_zcmn	blue	448.189	PREDICTED: protein PHYTOCHROME KINASE SUBSTRATE 3 [Beta vulgaris subsp. vulgaris]	GO:0003674(molecular_function);GO:0005886(plasma membrane);GO:0009506(plasmodesma);GO:0009585(red, far-red light phototransduction)	NA	NA	NA	0.47	0.35	0.39	0.42	0.33	0.46	0.57	0.6	0.83	0.22	0.34	0.18	2	1.97	2.16	9.87873e-24	3.07274e-23
Bv_012020_fggd	blue	447.923	PREDICTED: uncharacterized SDCCAG3 family protein [Beta vulgaris subsp. vulgaris]	NA	NA	NA	NA	31.73	36.69	32.06	27.52	29.58	26.48	64.69	61.2	61.13	63.3	70.73	60.82	75.35	76.66	92.58	3.54031e-78	3.45094e-77
Bv6_152390_msrc	blue	447.768	PREDICTED: cold and drought-regulated protein CORA [Beta vulgaris subsp. vulgaris]	NA	NA	NA	NA	4.95	7.9	5.69	8.99	13.75	10.42	4.23	5.45	4.26	6.79	12.56	5.3	48.56	43.94	53.7	1.035e-63	7.90819e-63
Bv6_142080_zhow	blue	447.657	PREDICTED: protein NRT1/ PTR FAMILY 3.1 [Beta vulgaris subsp. vulgaris]	GO:0005215(transporter activity);GO:0005886(plasma membrane);GO:0006857(oligopeptide transport);GO:0010336(gibberellic acid homeostasis);GO:0016020(membrane);GO:0016021(integral component of membrane);GO:0022857(transmembrane transporter activity);GO:0042128(nitrate assimilation);GO:0055085(transmembrane transport);GO:0097708(intracellular vesicle)	NA	NA	NA	30.26	31.37	29.43	48.76	49.18	46.53	27.76	26.84	26.03	41.06	42.41	43.71	143.4	124.98	135.37	3.7507e-290	2.2572e-288
Bv4_073970_cmym	blue	447.628	PREDICTED: protein N-lysine methyltransferase METTL21A [Beta vulgaris subsp. vulgaris]	GO:0005737(cytoplasm)	NA	NA	NA	2.17	3.45	3.39	3.5	3.9	3.81	3.52	4.69	3.67	5.56	4.62	5.57	7.3	8.79	7.5	1.12239e-11	2.13154e-11
Bv1_015990_uqjw	blue	447.526	PREDICTED: glutamyl-tRNA reductase 1, chloroplastic isoform X2 [Beta vulgaris subsp. vulgaris]	GO:0005515(protein binding);GO:0006779(porphyrin-containing compound biosynthetic process);GO:0006782(protoporphyrinogen IX biosynthetic process);GO:0006783(heme biosynthetic process);GO:0008883(glutamyl-tRNA reductase activity);GO:0009416(response to light stimulus);GO:0009507(chloroplast);GO:0015995(chlorophyll biosynthetic process);GO:0031969(chloroplast membrane);GO:0050661(NADP binding);GO:0…	00860(Porphyrin and chlorophyll metabolism)	K02492	EC:1.2.1.70	291.05	325.26	332.66	294.72	302.79	317.95	168.8	165.22	178.59	180.04	182.68	194.57	117.84	110.95	120.17	1.04642e-19	2.83402e-19
Bv4_087410_qejj	blue	447.099	PREDICTED: NAC transcription factor 56 [Beta vulgaris subsp. vulgaris]	GO:0003700(DNA binding transcription factor activity);GO:0005634(nucleus);GO:0006351(transcription, DNA-templated);GO:0006355(regulation of transcription, DNA-templated);GO:0007275(multicellular organism development);GO:0009753(response to jasmonic acid);GO:0044212(transcription regulatory region DNA binding);GO:0045995(regulation of embryonic development);GO:0048317(seed morphogenesis);GO:008006…	04141(Protein processing in endoplasmic reticulum);04120(Ubiquitin mediated proteolysis)	K03094	NA	0.47	0.56	0.7	0.45	0.81	0.81	2.18	1.96	2.51	1.8	1.58	1.52	2.98	3.95	3.02	1.02503e-19	2.77694e-19
Bv6_135560_wyxk	blue	446.972	PREDICTED: aspartic proteinase-like protein 1 isoform X2 [Beta vulgaris subsp. vulgaris];PREDICTED: aspartic proteinase-like protein 1 isoform X1 [Beta vulgaris subsp. vulgaris]	GO:0004190(aspartic-type endopeptidase activity);GO:0006508(proteolysis);GO:0030163(protein catabolic process);GO:0030163(protein catabolic process)	NA	NA	NA	7.45	7.59	7.52	29.32	31.54	24.16	44.5	42.32	44.69	51.82	50.25	59.59	90.02	76.81	66.34	1.94805e-180	5.6175e-179
Bv_008570_ognx	blue	446.901	PREDICTED: PI-PLC X domain-containing protein At5g67130 [Beta vulgaris subsp. vulgaris]	GO:0005886(plasma membrane)	NA	NA	NA	5.13	4.24	3.94	41.06	37.94	40.78	51.54	52.1	56.24	70.59	68.65	66.44	101.97	93.93	98.86	0	0
Bv7_169350_wpqt	blue	446.67	PREDICTED: uncharacterized protein LOC104899696 [Beta vulgaris subsp. vulgaris]	GO:0005509(calcium ion binding)	NA	NA	NA	57.13	63.03	64.67	23.72	22.34	24.81	97.26	111.04	97.35	73.9	100.29	86.53	137.65	142.73	152.02	1.12728e-121	1.8975e-120
Bv6_145000_eyzd	blue	446.631	hypothetical protein BVRB_5g112080 [Beta vulgaris subsp. vulgaris]	NA	NA	NA	NA	0.28	0.31	0.07	0.39	0.8	0.2	0.38	0.62	0.33	0.73	0.55	0.65	1.52	1.92	2.11	7.77611e-09	1.27539e-08
Bv5_113110_wkdm	blue	446.603	PREDICTED: chloride channel protein CLC-b isoform X1 [Beta vulgaris subsp. vulgaris]	GO:0005247(voltage-gated chloride channel activity);GO:0005253(anion channel activity);GO:0005515(protein binding);GO:0005622(intracellular);GO:0005634(nucleus);GO:0006821(chloride transport);GO:0009671(nitrate:proton symporter activity);GO:0009705(plant-type vacuole membrane);GO:0034707(chloride channel complex);GO:0034765(regulation of ion transmembrane transport);GO:1902476(chloride transmembr…	NA	NA	NA	3.48	3.46	3.17	1.37	1.39	1.24	6.86	7.09	7.38	4.8	4.42	4.73	11.34	8.42	10.45	1.21841e-111	1.84702e-110
Bv5_122150_zycx	blue	446.019	hypothetical protein BVRB_5g122150 [Beta vulgaris subsp. vulgaris]	GO:0005634(nucleus);GO:0005737(cytoplasm);GO:0008408(3'-5' exonuclease activity)	NA	NA	NA	2	2.11	2.32	1.53	1.46	1.62	3.98	3.15	3.35	4.43	4.69	4.36	5.16	5.77	5.43	1.98093e-30	7.50259e-30
Bv6_150370_whxc	blue	446.007	PREDICTED: transcription factor TCP20-like [Beta vulgaris subsp. vulgaris]	GO:0000987(proximal promoter sequence-specific DNA binding);GO:0003677(DNA binding);GO:0003700(DNA binding transcription factor activity);GO:0005515(protein binding);GO:0005634(nucleus);GO:0006351(transcription, DNA-templated);GO:0006355(regulation of transcription, DNA-templated);GO:0008361(regulation of cell size);GO:0009653(anatomical structure morphogenesis);GO:0043565(sequence-specific DNA b…	04712(Circadian rhythm - plant)	K16221	NA	0.71	0.56	0.69	0.35	0.81	0.56	0.92	0.93	0.93	1.26	0.8	0.9	1.83	1.48	1.5	4.82264e-06	6.68351e-06
Bv2_043350_xhek	blue	445.736	PREDICTED: ervatamin-B isoform X1 [Beta vulgaris subsp. vulgaris]	GO:0004197(cysteine-type endopeptidase activity);GO:0005615(extracellular space);GO:0005764(lysosome);GO:0051603(proteolysis involved in cellular protein catabolic process)	04145(Phagosome)	K01365	EC:3.4.22.15	1.15	1.43	1.03	1.6	1.15	1.23	1.2	1.27	1.34	1.9	1.63	1.38	3.07	3.29	2.67	2.01429e-05	2.68323e-05
Bv4_075060_akem	blue	445.159	hypothetical protein BVRB_4g075060 [Beta vulgaris subsp. vulgaris]	GO:0005886(plasma membrane);GO:0016021(integral component of membrane)	NA	NA	NA	0	0.05	0	0.05	0.05	0.22	1.28	1.2	1.06	0.49	0.58	0.32	1.74	1.74	2.36	2.84639e-27	9.86667e-27
Bv4_094560_frca	blue	444.765	PREDICTED: transcription factor bHLH94 [Beta vulgaris subsp. vulgaris]	GO:0005634(nucleus)	NA	NA	NA	0.8	0.29	0.19	0	0.54	0.5	1.8	0.97	0.96	1.8	0.7	1.85	3.22	2.42	3.42	1.84721e-05	2.46834e-05
Bv8_185570_kytj	blue	444.078	PREDICTED: malonyl-CoA decarboxylase, mitochondrial isoform X2 [Beta vulgaris subsp. vulgaris]	GO:0005777(peroxisome);GO:0006633(fatty acid biosynthetic process);GO:0050080(malonyl-CoA decarboxylase activity);GO:0050080(malonyl-CoA decarboxylase activity)	00640(Propanoate metabolism);00410(beta-Alanine metabolism);04146(Peroxisome);04146(Peroxisome)	K01578	EC:4.1.1.9	18.63	16.85	20.53	21.65	27.47	22.04	31.55	30.99	30.32	33.93	34.27	31.65	38.37	38.64	42.36	7.04603e-19	1.85009e-18
Bv9_213071z3286	blue	443.936	hypothetical protein BVRB_9g213110 [Beta vulgaris subsp. vulgaris]	GO:0009926(auxin polar transport);GO:0046620(regulation of organ growth)	04075(Plant hormone signal transduction)	K14488	NA	0.78	0.65	0.82	0.26	0.45	0.24	0.16	0.29	0.57	0.93	0.74	0.71	2.32	2.39	2.11	4.94211e-09	8.18335e-09
Bv3_065140_iuwd	blue	443.829	PREDICTED: uncharacterized protein LOC104889726 isoform X1 [Beta vulgaris subsp. vulgaris]	NA	NA	NA	NA	1.59	1.95	1.82	3.87	3.51	3.22	20.78	20.79	18.52	16.09	16.86	19.65	27	22.95	27.45	3.4912e-276	1.9693e-274
Bv4_083980_jjfz	blue	443.724	PREDICTED: uncharacterized protein LOC104891179 [Beta vulgaris subsp. vulgaris]	GO:0006487(protein N-linked glycosylation);GO:0036071(N-glycan fucosylation)	NA	NA	NA	40.27	47.24	42.47	41.83	37.9	39.67	105.54	106.22	101.56	88.96	86.36	83.73	122.02	116.39	127.61	1.75557e-100	2.31089e-99
Bv2_046930_pgwp	blue	442.874	hypothetical protein BVRB_2g046930 [Beta vulgaris subsp. vulgaris]	NA	NA	NA	NA	9.57	12.45	11.25	4.91	4.33	3	12.52	13.19	10.21	19.56	17.76	14.92	26.04	26.24	23.02	2.04877e-49	1.21149e-48
Bv4_085140_xced	blue	442.644	hypothetical protein BVRB_4g085140 [Beta vulgaris subsp. vulgaris]	GO:0004674(protein serine/threonine kinase activity);GO:0005634(nucleus);GO:0005737(cytoplasm);GO:0006897(endocytosis);GO:0008360(regulation of cell shape);GO:0016055(Wnt signaling pathway);GO:0018105(peptidyl-serine phosphorylation)	NA	NA	NA	1.29	1.34	1.33	0.88	1.08	1.02	1.6	1.12	0.74	1.55	1.76	1.93	3.01	3.75	4.39	6.246e-17	1.51613e-16
Bv8_197670_xfio	blue	442.459	PREDICTED: uncharacterized protein LOC104902318 [Beta vulgaris subsp. vulgaris]	GO:0003674(molecular_function);GO:0005634(nucleus);GO:0006979(response to oxidative stress);GO:0016607(nuclear speck);GO:0046686(response to cadmium ion)	NA	NA	NA	33.32	42.26	36.34	19.56	15.83	15.2	21.29	24.81	20.16	31.85	37.35	29.58	84.62	81.95	75.87	4.02986e-61	2.93695e-60
Bv5_115060_ggod	blue	442.283	PREDICTED: probable WRKY transcription factor 61 [Beta vulgaris subsp. vulgaris]	GO:0003700(DNA binding transcription factor activity);GO:0005634(nucleus);GO:0006351(transcription, DNA-templated);GO:0006355(regulation of transcription, DNA-templated);GO:0043565(sequence-specific DNA binding)	04016(MAPK signaling pathway - plant);04626(Plant-pathogen interaction)	K13424	NA	0	0.26	0.03	3.71	4.15	3.42	3.49	3.85	2.64	6.93	6.78	5.66	10.54	10.05	10.52	2.89062e-102	3.89909e-101
Bv9_217170_rjqi	blue	442.015	PREDICTED: uncharacterized protein LOC104904326 [Beta vulgaris subsp. vulgaris]	GO:0003674(molecular_function);GO:0008150(biological_process);GO:0009507(chloroplast);GO:0016021(integral component of membrane)	NA	NA	NA	3.74	6.67	5.79	5.96	3.33	4.68	5.12	6.05	5.02	4.32	3.44	5.41	16.34	15.85	19.72	1.10097e-22	3.31786e-22
Bv6_153820_zsne	blue	441.437	PREDICTED: ribonuclease 3 isoform X1 [Beta vulgaris subsp. vulgaris]	GO:0003723(RNA binding);GO:0004521(endoribonuclease activity);GO:0005576(extracellular region);GO:0007568(aging);GO:0033897(ribonuclease T2 activity)	NA	NA	NA	0	0.15	0.1	0.11	0	0.23	3.07	2.48	2.01	1.38	1.51	2.25	4.69	3.36	3.38	6.2445e-35	2.66391e-34
Bv1_015720_qpod	blue	440.695	PREDICTED: cell wall protein DAN4 [Beta vulgaris subsp. vulgaris]	GO:0003674(molecular_function);GO:0005634(nucleus);GO:0005739(mitochondrion);GO:0008150(biological_process)	NA	NA	NA	3.08	3.71	3.65	3.68	5.17	4.81	5.22	4.95	4.4	4.15	4.73	5.13	7.63	8.45	7.9	3.45212e-11	6.40385e-11
Bv5_105820_ddrx	blue	440.425	PREDICTED: em-like protein GEA6 [Beta vulgaris subsp. vulgaris]	GO:0003674(molecular_function);GO:0005737(cytoplasm);GO:0005829(cytosol);GO:0009737(response to abscisic acid);GO:0048316(seed development);GO:0048700(acquisition of desiccation tolerance in seed)	NA	NA	NA	0.13	0.15	0.32	0.91	1.27	0.69	1.74	2.67	1.89	2.37	2.67	2.09	3.05	4.19	3.85	1.7407e-25	5.72197e-25
Bv4_094790_ouwp	blue	439.741	PREDICTED: glycerol-3-phosphate dehydrogenase [NAD(+)] [Beta vulgaris subsp. vulgaris]	GO:0004367(glycerol-3-phosphate dehydrogenase [NAD+] activity);GO:0005975(carbohydrate metabolic process);GO:0006072(glycerol-3-phosphate metabolic process);GO:0006650(glycerophospholipid metabolic process);GO:0008654(phospholipid biosynthetic process);GO:0009331(glycerol-3-phosphate dehydrogenase complex);GO:0009507(chloroplast);GO:0042803(protein homodimerization activity);GO:0046167(glycerol-3…	00564(Glycerophospholipid metabolism)	K00006	EC:1.1.1.8	0.45	0.75	0.52	0.71	0.92	0.61	1.08	0.94	0.73	1.15	1.23	1.11	2.41	2.31	1.59	3.38199e-14	7.2275e-14
Bv6_144640_uyzy	blue	439.543	hypothetical protein BVRB_6g144640 [Beta vulgaris subsp. vulgaris]	NA	NA	NA	NA	0.32	0.47	0.22	0.65	0.47	0.5	0.48	0.61	0.8	0.6	0.44	0.6	1.35	1.17	1.39	6.75847e-07	9.88956e-07
Bv2_045050_iqfk	blue	439.222	PREDICTED: protein GLUTAMINE DUMPER 3 [Beta vulgaris subsp. vulgaris]	GO:0005515(protein binding);GO:0005634(nucleus);GO:0005886(plasma membrane);GO:0010585(glutamine secretion);GO:0016020(membrane);GO:0016021(integral component of membrane);GO:0080143(regulation of amino acid export)	NA	NA	NA	0.59	0.51	0.48	0.29	0.45	0.22	0.31	0.3	0.47	0.68	0.43	0.28	1.87	2	1.62	2.57304e-08	4.08607e-08
Bv7_160850_krfn	blue	438.871	PREDICTED: auxin-binding protein ABP19a [Beta vulgaris subsp. vulgaris]	GO:0005618(cell wall);GO:0033609(oxalate metabolic process);GO:0046564(oxalate decarboxylase activity)	NA	NA	NA	1.38	0.86	1.29	2.92	1.54	1.83	0.6	0.74	0.25	1.22	1.69	1.01	18.77	13.1	14.67	4.27454e-75	3.97089e-74
Bv7_169340_mcdu	blue	438.871	ABSCISIC ACID-INSENSITIVE 5-like protein 5 [Beta vulgaris subsp. vulgaris]	GO:0000976(transcription regulatory region sequence-specific DNA binding);GO:0000977(RNA polymerase II regulatory region sequence-specific DNA binding);GO:0003677(DNA binding);GO:0003700(DNA binding transcription factor activity);GO:0005515(protein binding);GO:0005634(nucleus);GO:0006351(transcription, DNA-templated);GO:0006355(regulation of transcription, DNA-templated);GO:0009414(response to wa…	04075(Plant hormone signal transduction)	K14432	NA	53.1	54.99	54.8	103.63	104.1	94.4	139.22	138.92	130.94	124.25	121.56	117.05	173.51	178.96	187.91	8.96385e-94	1.07173e-92
Bv4_071440_dwdk	blue	438.691	uncharacterized protein LOC105168494 [Sesamum indicum]	GO:0003674(molecular_function);GO:0005739(mitochondrion);GO:0006979(response to oxidative stress);GO:0016021(integral component of membrane)	NA	NA	NA	9.15	10.66	10.59	23	23.55	21.32	22.47	21.33	18.63	21.08	21.38	19.88	40.64	43.18	44.09	8.72787e-69	7.24738e-68
Bv2_024610_uixa	blue	438.073	PREDICTED: uncharacterized protein LOC104903972 [Beta vulgaris subsp. vulgaris]	GO:0003674(molecular_function);GO:0005634(nucleus);GO:0008150(biological_process)	NA	NA	NA	0.62	0.69	0.51	0.89	0.65	0.75	0.92	0.95	0.91	1.16	1.07	0.83	1.38	1.29	1.35	3.60414e-07	5.35179e-07
Bv6_153580_xitp	blue	437.969	PREDICTED: uncharacterized protein LOC104897880 [Beta vulgaris subsp. vulgaris]	GO:0003674(molecular_function);GO:0005634(nucleus);GO:0008150(biological_process)	NA	NA	NA	14.51	17.47	16.9	19.36	18.35	19.59	29.44	31.28	34	31.55	29.16	29.95	41.4	33.61	38.44	5.10887e-41	2.53597e-40
Bv8_192740_xrrc	blue	437.858	PREDICTED: uncharacterized protein LOC104901896 [Beta vulgaris subsp. vulgaris]	GO:0003674(molecular_function);GO:0005575(cellular_component);GO:0008150(biological_process)	NA	NA	NA	42.58	44.77	43.6	56.42	57.8	59.4	54.95	55.2	53.88	44.04	48.62	48.07	16.27	16.06	14.24	2.67954e-110	3.99798e-109
Bv8_180930_hmdz	blue	436.989	PREDICTED: uncharacterized protein LOC104900492 [Beta vulgaris subsp. vulgaris]	GO:0003743(translation initiation factor activity);GO:0005634(nucleus);GO:0006413(translational initiation)	NA	NA	NA	14.42	18.07	14.77	13.22	11.87	10.87	10.71	11.26	10.89	13.5	15.49	13.7	39.33	30.85	36.03	5.20967e-47	2.92125e-46
Bv6_129670_nmzd	blue	435.808	hypothetical protein BVRB_6g129670 isoform C [Beta vulgaris subsp. vulgaris];PREDICTED: probable methyltransferase PMT27 [Beta vulgaris subsp. vulgaris]	GO:0005768(endosome);GO:0005774(vacuolar membrane);GO:0005802(trans-Golgi network);GO:0008757(S-adenosylmethionine-dependent methyltransferase activity);GO:0032259(methylation);GO:0032259(methylation)	NA	NA	NA	1.87	1.9	2.24	2.03	2.44	2.22	1.82	1.3	1.88	0.87	1.06	1.22	0.2	0.49	0.59	1.4562e-16	3.47979e-16
Bv8_197390_cxci	blue	435.769	hypothetical protein BVRB_8g197390 [Beta vulgaris subsp. vulgaris]	GO:0000209(protein polyubiquitination);GO:0043161(proteasome-mediated ubiquitin-dependent protein catabolic process);GO:0061630(ubiquitin protein ligase activity)	NA	NA	NA	0	0	0	0.24	0.44	0.25	0.19	0.26	0.27	0	0	0.45	3.4	3.32	5.2	4.30621e-15	9.60649e-15
Bv2_044830_gkdo	blue	435.246	PREDICTED: protein TIC 55, chloroplastic [Beta vulgaris subsp. vulgaris]	GO:0009507(chloroplast);GO:0009706(chloroplast inner membrane);GO:0009941(chloroplast envelope);GO:0010277(chlorophyllide a oxygenase [overall] activity);GO:0016021(integral component of membrane);GO:0045036(protein targeting to chloroplast);GO:0046872(metal ion binding);GO:0051537(2 iron, 2 sulfur cluster binding);GO:0055114(oxidation-reduction process)	00860(Porphyrin and chlorophyll metabolism)	K13071	EC:1.14.15.17	29.14	32.23	32.9	55.15	55.78	52.82	101.21	101.45	97.45	60.42	67.32	65.55	133.59	126.79	138.39	8.79538e-150	1.97583e-148
Bv8_183860_mxzz	blue	435.079	hypothetical protein BVRB_8g183860 [Beta vulgaris subsp. vulgaris]	GO:1901708((+)-3'-hydroxylarreatricin biosynthetic process);GO:1901709((+)-larreatricin metabolic process)	00350(Tyrosine metabolism);00950(Isoquinoline alkaloid biosynthesis)	K00422	EC:1.10.3.1	3	3.39	3.38	4.4	4.11	4.35	12.78	11.42	12.04	7.18	6.55	6.77	15.26	15.61	17.21	6.64449e-68	5.42227e-67
Bv5_119800_woex	blue	434.924	hypothetical protein BVRB_5g119800 [Beta vulgaris subsp. vulgaris]	GO:0006952(defense response);GO:0007165(signal transduction);GO:0016020(membrane);GO:0016021(integral component of membrane)	04016(MAPK signaling pathway - plant)	K20718	EC:2.7.11.1	0.1	0	0	0.07	0.17	0.05	1.02	1.39	1.17	1.23	0.78	0.82	2.23	1.24	2.27	7.79404e-25	2.51247e-24
Bv2_046600_nsyu	blue	434.438	PREDICTED: ATP-dependent 6-phosphofructokinase 5, chloroplastic [Beta vulgaris subsp. vulgaris]	GO:0003872(6-phosphofructokinase activity);GO:0005524(ATP binding);GO:0005945(6-phosphofructokinase complex);GO:0006002(fructose 6-phosphate metabolic process);GO:0006096(glycolytic process);GO:0009507(chloroplast);GO:0046872(metal ion binding)	00010(Glycolysis / Gluconeogenesis);00030(Pentose phosphate pathway);00051(Fructose and mannose metabolism);00052(Galactose metabolism);03018(RNA degradation)	K00850	EC:2.7.1.11	2.15	2.54	2.58	2.97	2.81	2.82	4.22	3.91	4.29	4.01	3.99	4.4	5.15	4.76	4.75	7.80038e-25	2.51406e-24
Bv1_010650_gfpg	blue	434.249	PREDICTED: ACT domain-containing protein ACR3 [Beta vulgaris subsp. vulgaris]	GO:0005829(cytosol);GO:0016597(amino acid binding)	NA	NA	NA	48.42	53.21	57.98	49.11	49.11	49.49	54	51.65	49.82	96	95.83	98.56	131.05	116.84	127.31	1.81738e-51	1.10854e-50
Bv2_030700_xzwk	blue	434.203	PREDICTED: synaptotagmin-5 [Beta vulgaris subsp. vulgaris]	GO:0005783(endoplasmic reticulum)	NA	NA	NA	10.31	14.16	12.64	20.11	18.33	17.27	27.08	25.29	23.44	30.38	29.44	29.55	37.95	36.22	32.94	1.56809e-37	7.12531e-37
Bv4_084080_rwwj	blue	433.926	PREDICTED: transcription repressor MYB6 [Beta vulgaris subsp. vulgaris]	GO:0000981(RNA polymerase II transcription factor activity, sequence-specific DNA binding);GO:0001135(transcription factor activity, RNA polymerase II transcription factor recruiting);GO:0003677(DNA binding);GO:0003700(DNA binding transcription factor activity);GO:0005515(protein binding);GO:0005634(nucleus);GO:0006351(transcription, DNA-templated);GO:0006355(regulation of transcription, DNA-temp…	NA	NA	NA	1.03	0.81	1.09	0.35	0.51	0.52	1.44	1.57	1.16	1.14	1.2	1.08	2.33	1.9	1.97	1.32444e-17	3.30219e-17
Bv3_051180_ookz	blue	433.905	PREDICTED: uncharacterized protein LOC104888174 [Beta vulgaris subsp. vulgaris]	GO:0003674(molecular_function);GO:0005634(nucleus);GO:0008150(biological_process)	NA	NA	NA	0.9	1.39	0.66	2.03	2.44	2.91	3.59	2.76	2.86	3.28	3.37	2.72	5.06	4.81	5.24	1.74762e-21	5.04843e-21
Bv3_061340_xzag	blue	433.679	PREDICTED: G-type lectin S-receptor-like serine/threonine-protein kinase SD3-1 [Beta vulgaris subsp. vulgaris]	GO:0004674(protein serine/threonine kinase activity);GO:0005886(plasma membrane);GO:0006468(protein phosphorylation)	NA	NA	NA	144.43	152.21	160.75	116.79	105.58	114.47	101.4	100.97	95.7	99.49	95.42	96.3	54.41	51.27	52.74	1.96449e-79	1.94439e-78
Bv4_081350_rtpk	blue	433.638	PREDICTED: probable linoleate 9S-lipoxygenase 5 [Beta vulgaris subsp. vulgaris]	GO:0016165(linoleate 13S-lipoxygenase activity)	00591(Linoleic acid metabolism)	K15718	EC:1.13.11.58	14.95	16.83	19.3	20.63	22.57	22.46	16.9	16.24	16.1	20.08	20.03	22.43	46.2	39.21	45.44	9.71414e-72	8.51419e-71
Bv4_080510_nfuy	blue	433.584	PREDICTED: exonuclease mut-7 isoform X1 [Beta vulgaris subsp. vulgaris];PREDICTED: uncharacterized protein LOC104890363 isoform X1 [Beta vulgaris subsp. vulgaris]	GO:0008408(3'-5' exonuclease activity);GO:0008408(3'-5' exonuclease activity)	NA	NA	NA	3.24	3.57	3.6	5.39	3.93	4.67	4.96	4.65	5	5.69	4.72	4.66	7.17	7.32	7.51	5.6353e-10	9.83622e-10
Bv6_154460_dear	blue	432.829	hypothetical protein BVRB_6g154460 [Beta vulgaris subsp. vulgaris]	NA	NA	NA	NA	0.28	0.6	0.65	0.57	0.25	0.28	0.22	0.19	0.04	0.55	0.41	0.16	2.44	2.76	2.97	1.12899e-16	2.71048e-16
Bv9_219430_yiai	blue	432.177	PREDICTED: probable LRR receptor-like serine/threonine-protein kinase At4g36180 isoform X1 [Beta vulgaris subsp. vulgaris]	GO:0007165(signal transduction)	NA	NA	NA	1.17	0.63	0.27	4.14	5.59	5.87	3.85	3.61	2.39	5.27	6.09	4.41	17.07	12.11	14.87	5.68365e-40	2.76186e-39
Bv4_081870_uxmo	blue	432.165	PREDICTED: probable serine/threonine-protein kinase WNK9 [Beta vulgaris subsp. vulgaris]	GO:0004674(protein serine/threonine kinase activity);GO:0005829(cytosol);GO:0006468(protein phosphorylation);GO:0035556(intracellular signal transduction)	NA	NA	NA	14.11	14.97	15.06	19.34	19.8	18.01	18.29	18.65	17.27	15.6	15.47	14.53	36.14	34.7	35.58	2.40193e-91	2.8047e-90
Bv8_191500_dzne	blue	431.864	hypothetical protein BVRB_8g191500 [Beta vulgaris subsp. vulgaris]	GO:0005829(cytosol);GO:0008420(CTD phosphatase activity);GO:0016591(DNA-directed RNA polymerase II, holoenzyme);GO:0070940(dephosphorylation of RNA polymerase II C-terminal domain)	NA	NA	NA	0.25	0	0.26	0.89	0.23	0.85	0.8	0.6	0.72	2.1	1.17	1.26	3.08	2.18	3.03	1.41813e-09	2.41737e-09
Bv2_024790_xoke	blue	431.713	PREDICTED: probable serine/threonine-protein kinase NAK [Beta vulgaris subsp. vulgaris]	GO:0004675(transmembrane receptor protein serine/threonine kinase activity);GO:0005524(ATP binding);GO:0005886(plasma membrane);GO:0006468(protein phosphorylation);GO:0006952(defense response);GO:0007166(cell surface receptor signaling pathway);GO:0009507(chloroplast);GO:0016301(kinase activity)	NA	NA	NA	24.21	27.82	25.25	20.06	19.91	20.96	18.83	18.6	18.59	16.65	18.22	18.04	11.41	10	11.98	5.15123e-38	2.37183e-37
Bv9_218600_mfok	blue	431.674	PREDICTED: myb family transcription factor EFM [Beta vulgaris subsp. vulgaris]	GO:0003677(DNA binding);GO:0003700(DNA binding transcription factor activity);GO:0005634(nucleus);GO:0006351(transcription, DNA-templated);GO:0006355(regulation of transcription, DNA-templated)	04075(Plant hormone signal transduction)	K14491	NA	52.65	55.94	48.55	69.59	72.78	70.25	86.13	87.65	78.23	69.92	70.24	68.46	107.89	108.95	116.83	3.89859e-41	1.94002e-40
Bv6_136030_zeau	blue	431.536	hypothetical protein BVRB_6g136030 [Beta vulgaris subsp. vulgaris]	NA	NA	NA	NA	1.52	2.08	1.63	0.74	0.74	0.67	0.94	1.36	0.96	1.64	1.46	1.93	3.9	3.89	3.48	3.97887e-29	1.45816e-28
Bv5_121460_tiqs	blue	431.276	PREDICTED: uncharacterized protein LOC104894736 [Beta vulgaris subsp. vulgaris]	GO:0003674(molecular_function);GO:0008150(biological_process)	NA	NA	NA	10.18	10.52	9.29	11.5	12.42	10.99	4.83	5.5	4.86	4.13	3.76	4.47	1.33	1.99	1.97	1.406e-68	1.16107e-67
Bv6_135310_qnok	blue	431.093	PREDICTED: PLAT domain-containing protein 3 [Beta vulgaris subsp. vulgaris]	GO:0003674(molecular_function);GO:0005576(extracellular region);GO:0005783(endoplasmic reticulum);GO:0008150(biological_process);GO:0009507(chloroplast);GO:0009579(thylakoid);GO:0016020(membrane)	NA	NA	NA	14.29	15.92	17.51	32.81	31.95	34.47	76.88	75.57	79.51	65.51	61.39	66.18	91.85	92.52	97.28	5.13309e-236	2.17841e-234
Bv4_071220_cfkg	blue	430.709	hypothetical protein BVRB_4g071220 isoform A [Beta vulgaris subsp. vulgaris];PREDICTED: uncharacterized protein LOC104889867 [Beta vulgaris subsp. vulgaris]	GO:0003674(molecular_function);GO:0008150(biological_process);GO:0009507(chloroplast);GO:0009507(chloroplast)	NA	NA	NA	4.55	3.67	4.83	14.32	15.14	12.84	18.75	17.69	19.1	15.41	13.82	14.47	30	27.53	30.48	1.11934e-97	1.42543e-96
Bv3_063510_aeta	blue	430.281	PREDICTED: cytochrome P450 94A2 [Beta vulgaris subsp. vulgaris]	GO:0004497(monooxygenase activity);GO:0005506(iron ion binding);GO:0009507(chloroplast);GO:0016705(oxidoreductase activity, acting on paired donors, with incorporation or reduction of molecular oxygen);GO:0019825(oxygen binding);GO:0020037(heme binding);GO:0055114(oxidation-reduction process)	00073(Cutin, suberine and wax biosynthesis)	K20769	EC:1.14.-.-	2.07	3.05	2.8	3.85	4.24	3.34	4.13	3.02	3.91	2.69	2.77	3.55	8.5	9.11	9.13	1.10888e-24	3.55671e-24
Bv1_001130_owtt	blue	430.102	PREDICTED: serine/threonine-protein phosphatase PP-Z1 [Beta vulgaris subsp. vulgaris]	GO:0003674(molecular_function);GO:0005634(nucleus);GO:0008150(biological_process)	NA	NA	NA	2.35	2.33	1.75	0.95	1.7	1.16	3.01	2.44	1.8	2.54	2.04	2.68	4.25	4.16	5.34	1.24146e-09	2.12387e-09
Bv5_115740_usof	blue	429.88	hypothetical protein BVRB_5g115740 [Beta vulgaris subsp. vulgaris]	GO:0005576(extracellular region);GO:0006952(defense response);GO:0030414(peptidase inhibitor activity);GO:0031640(killing of cells of other organism);GO:0050832(defense response to fungus)	NA	NA	NA	8.81	9.23	9.23	9.05	8.53	10.09	7.84	7.29	8.02	13.51	13.49	12.85	19.01	19.6	19.06	4.72354e-48	2.71464e-47
Bv3_064330_gria	blue	429.614	PREDICTED: pentatricopeptide repeat-containing protein At1g05600 [Beta vulgaris subsp. vulgaris]	GO:0003723(RNA binding);GO:0004519(endonuclease activity);GO:0005739(mitochondrion);GO:0009451(RNA modification);GO:0043231(intracellular membrane-bounded organelle)	NA	NA	NA	0.84	0.93	0.92	0.71	1.17	0.78	1.25	0.94	0.62	1.3	1.92	1.63	2.6	2.25	2.71	1.85642e-12	3.66236e-12
Bv_002600_mhch	blue	429.358	PREDICTED: LRR receptor-like serine/threonine-protein kinase FLS2 [Beta vulgaris subsp. vulgaris]	GO:0004674(protein serine/threonine kinase activity);GO:0004675(transmembrane receptor protein serine/threonine kinase activity);GO:0005515(protein binding);GO:0005524(ATP binding);GO:0005768(endosome);GO:0005886(plasma membrane);GO:0006468(protein phosphorylation);GO:0006898(receptor-mediated endocytosis);GO:0007169(transmembrane receptor protein tyrosine kinase signaling pathway);GO:0010008(end…	04016(MAPK signaling pathway - plant);04626(Plant-pathogen interaction)	K13420	EC:2.7.11.1	5.95	6.12	7.27	5.3	6.03	6.93	2.32	2.28	1.93	3.87	3.36	3.07	0.57	0.88	0.52	1.95804e-62	1.46256e-61
Bv1_015150_ihwg	blue	429.191	PREDICTED: U-box domain-containing protein 4 [Beta vulgaris subsp. vulgaris]	GO:0005634(nucleus);GO:0005737(cytoplasm)	NA	NA	NA	10.35	11.87	10.58	14.1	15.2	14.06	16.92	18.49	17.65	15.29	16.75	15.31	20.82	23.09	22.3	8.37553e-24	2.6124e-23
Bv5_103990_rjha	blue	428.847	PREDICTED: methionine gamma-lyase [Beta vulgaris subsp. vulgaris]	GO:0003824(catalytic activity);GO:0003962(cystathionine gamma-synthase activity);GO:0004123(cystathionine gamma-lyase activity);GO:0005737(cytoplasm);GO:0005829(cytosol);GO:0006520(cellular amino acid metabolic process);GO:0009970(cellular response to sulfate starvation);GO:0018826(methionine gamma-lyase activity);GO:0019343(cysteine biosynthetic process via cystathionine);GO:0019346(transsulfura…	00270(Cysteine and methionine metabolism);00450(Selenocompound metabolism)	K01761	EC:4.4.1.11	12.92	13.98	14.48	43.72	42.71	45.38	24.56	25.3	26.89	37.68	36.98	39.59	104.78	96.69	107.9	4.40286e-165	1.13017e-163
Bv5_117730_ewpc	blue	428.589	PREDICTED: tryptophan aminotransferase-related protein 2 [Beta vulgaris subsp. vulgaris]	GO:0005789(endoplasmic reticulum membrane);GO:0009684(indoleacetic acid biosynthetic process);GO:0009723(response to ethylene);GO:0009793(embryo development ending in seed dormancy);GO:0009851(auxin biosynthetic process);GO:0009908(flower development);GO:0009958(positive gravitropism);GO:0010078(maintenance of root meristem identity);GO:0010087(phloem or xylem histogenesis);GO:0010588(cotyledon v…	00380(Tryptophan metabolism)	K16903	EC:2.6.1.99	3.74	2.75	3.85	3.26	3.78	3.14	4.32	4.51	4.53	6.66	5.86	5.6	7.28	6.84	7.11	6.0788e-17	1.47614e-16
Bv3_062920_ppmy	blue	428.197	hypothetical protein BVRB_3g062920 [Beta vulgaris subsp. vulgaris]	GO:0005774(vacuolar membrane);GO:0005886(plasma membrane);GO:0006865(amino acid transport);GO:0015171(amino acid transmembrane transporter activity);GO:0016020(membrane);GO:0016021(integral component of membrane)	NA	NA	NA	3.78	4.76	4.16	3.95	4.18	3.8	13.41	12.47	11.75	12	11.82	11.19	15.51	14.46	15.06	1.31841e-171	3.55142e-170
Bv3_061280_wkig	blue	427.608	hypothetical protein BVRB_3g061280 [Beta vulgaris subsp. vulgaris]	GO:0003674(molecular_function);GO:0008150(biological_process)	NA	NA	NA	1.51	1.13	1.41	0.73	1.21	1.35	2.11	2.02	2.37	1.31	1.49	0.86	4.13	3.45	4.05	4.97741e-18	1.26342e-17
Bv9_217050_acha	blue	427.459	PREDICTED: late embryogenesis abundant protein [Beta vulgaris subsp. vulgaris]	NA	NA	NA	NA	0.47	0.06	0	48.93	47.72	42.74	9.18	11.1	9.54	50.97	42.33	42.15	151.11	143.8	160.12	0	0
Bv9_215290_grsd	blue	427.444	PREDICTED: uncharacterized protein LOC104904041 [Beta vulgaris subsp. vulgaris]	GO:0003824(catalytic activity);GO:0005737(cytoplasm);GO:0008150(biological_process);GO:0016787(hydrolase activity)	04144(Endocytosis)	K19367	NA	8.07	7.76	10.08	7.55	7.08	7.38	10.67	11.87	10.26	20.25	20.95	21.83	26.57	24.31	26.25	5.48408e-54	3.51176e-53
Bv4_091770_dzuy	blue	426.887	hypothetical protein BVRB_4g091770 isoform A [Beta vulgaris subsp. vulgaris];PREDICTED: putative F-box protein At1g58310 [Beta vulgaris subsp. vulgaris];hypothetical protein BVRB_4g091770 isoform C [Beta vulgaris subsp. vulgaris]	GO:0005634(nucleus);GO:0008150(biological_process);GO:0008150(biological_process)	NA	NA	NA	0.97	1.27	1.29	1.34	1.31	1.12	1.21	1.24	0.97	1.71	1.26	1.27	2.68	2.35	2.32	3.48829e-11	6.46895e-11
Bv9_224030_uqkf	blue	426.561	PREDICTED: ADP-ribosylation factor 1-like isoform X2 [Beta vulgaris subsp. vulgaris];PREDICTED: ADP-ribosylation factor 1-like isoform X1 [Beta vulgaris subsp. vulgaris]	GO:0005886(plasma membrane);GO:0006810(transport);GO:0022857(transmembrane transporter activity);GO:0022857(transmembrane transporter activity)	04144(Endocytosis);04144(Endocytosis)	K07937	NA	12.16	18.17	13.15	11.58	13.45	11.62	28.46	24.54	29.6	28.79	32.28	33.07	38.09	36.16	37.76	1.17337e-30	4.47513e-30
Bv1_019990_pxrc	blue	425.792	PREDICTED: protein CCC1 [Beta vulgaris subsp. vulgaris]	GO:0005381(iron ion transmembrane transporter activity);GO:0005384(manganese ion transmembrane transporter activity);GO:0006880(intracellular sequestering of iron ion);GO:0016020(membrane);GO:0030026(cellular manganese ion homeostasis);GO:0071281(cellular response to iron ion);GO:0071421(manganese ion transmembrane transport)	NA	NA	NA	0.03	0	0	0.52	0.54	0.55	0.61	0.6	0.78	0.47	0.51	0.35	1.38	1.53	1.49	7.27984e-50	4.34041e-49
Bv1_016330_toqf	blue	424.529	PREDICTED: uncharacterized protein LOC104905119 [Beta vulgaris subsp. vulgaris]	NA	NA	NA	NA	1.4	1.25	1.23	0.64	0.61	0.77	0.97	0.91	0.64	1.02	1.2	0.87	2.99	3.06	2.62	2.44213e-29	9.003e-29
Bv8_189010_mgok	blue	424.369	PREDICTED: (R)-mandelonitrile lyase-like [Beta vulgaris subsp. vulgaris]	GO:0006952(defense response);GO:0016614(oxidoreductase activity, acting on CH-OH group of donors);GO:0046202(cyanide biosynthetic process);GO:0046593(mandelonitrile lyase activity);GO:0050660(flavin adenine dinucleotide binding);GO:0055114(oxidation-reduction process)	00460(Cyanoamino acid metabolism)	K08248	EC:4.1.2.10	2.35	4.05	3.32	5.34	4.12	5.51	5.56	5.25	4.34	6	5.99	6.63	9.3	7.9	9.6	5.64053e-10	9.84439e-10
Bv6_128920_nmax	blue	424.183	PREDICTED: protein RADIALIS-like 1 [Beta vulgaris subsp. vulgaris]	GO:0003677(DNA binding);GO:0003700(DNA binding transcription factor activity);GO:0005634(nucleus);GO:0006355(regulation of transcription, DNA-templated)	NA	NA	NA	2.66	3.95	3.45	0.59	0.69	0.89	4.4	4.66	4.14	3.83	4.84	3.17	9.65	6.92	7.18	1.15991e-39	5.59254e-39
Bv5_098360_owsf	blue	424.099	PREDICTED: pectin acetylesterase 8 [Beta vulgaris subsp. vulgaris];hypothetical protein BVRB_5g098360 isoform B [Beta vulgaris subsp. vulgaris]	GO:0005576(extracellular region);GO:0005618(cell wall);GO:0009505(plant-type cell wall);GO:0016021(integral component of membrane);GO:0016787(hydrolase activity);GO:0052689(carboxylic ester hydrolase activity);GO:0052793(pectin acetylesterase activity);GO:0071555(cell wall organization);GO:0071555(cell wall organization)	NA	NA	NA	1.99	2.88	2.22	2.49	3.1	3.73	5.46	4.38	3.79	4.69	4.98	5.09	7.76	6.46	5.97	1.03248e-14	2.26373e-14
Bv6_141130_yujg	blue	424.038	PREDICTED: protein MIZU-KUSSEI 1 [Beta vulgaris subsp. vulgaris]	GO:0003674(molecular_function);GO:0008150(biological_process);GO:0009506(plasmodesma)	NA	NA	NA	0.72	0.77	0.73	0.46	0.58	0.75	0.69	0.86	0.8	0.93	1.38	0.85	2.24	1.54	1.74	3.17328e-06	4.45015e-06
Bv8_181950_qyra	blue	423.934	PREDICTED: uncharacterized protein LOC104900581 [Beta vulgaris subsp. vulgaris]	NA	NA	NA	NA	557.19	612.26	663.99	1454.5	1503.73	1502.27	4315.72	4310.4	4275	5341.08	5068.94	5271.49	6698.98	5616.27	6197.58	4.31812e-39	2.05014e-38
Bv9_211480_fzxu	blue	423.106	PREDICTED: uncharacterized protein At1g51745 [Beta vulgaris subsp. vulgaris]	GO:0003674(molecular_function);GO:0005634(nucleus);GO:0008150(biological_process)	00230(Purine metabolism)	K00759	EC:2.4.2.7	13.97	19.42	17.81	6.71	7	7.53	17.16	17.79	12.13	16.96	19.88	16.18	28.95	29.55	33.38	9.77394e-24	3.04067e-23
Bv9_215430_usps	blue	422.827	PREDICTED: ABC transporter G family member 11-like [Beta vulgaris subsp. vulgaris]	GO:0005886(plasma membrane);GO:0016021(integral component of membrane);GO:0042626(ATPase activity, coupled to transmembrane movement of substances)	02010(ABC transporters)	K05681	NA	0	0	0	0	0	0	0	0	0	0.4	0.43	0.38	2.74	1.47	3.57	3.62135e-24	1.1432e-23
Bv7_166470_zafk	blue	422.765	hypothetical protein BVRB_7g166470 [Beta vulgaris subsp. vulgaris]	NA	NA	NA	NA	1.47	2.19	1.54	29.49	31.65	29.35	67.46	70.5	63.35	148.04	145.75	134.95	163.5	174.29	185.62	0	0
Bv3_064600_wiae	blue	422.278	PREDICTED: disease resistance protein At4g27190 isoform X1 [Beta vulgaris subsp. vulgaris]	GO:0005524(ATP binding);GO:0005739(mitochondrion);GO:0006952(defense response);GO:0043531(ADP binding)	04626(Plant-pathogen interaction)	K13459	NA	3.52	4.83	4.39	3.76	5.06	5.19	3.67	3.95	3.75	3.19	2.45	2.71	1.41	1	1.04	1.45308e-26	4.93707e-26
Bv2_024960_gfof	blue	421.711	PREDICTED: telomere repeat-binding protein 3 [Beta vulgaris subsp. vulgaris]	GO:0000783(nuclear telomere cap complex);GO:0003691(double-stranded telomeric DNA binding);GO:0031627(telomeric loop formation)	NA	NA	NA	6	6	6.18	8.16	8.25	8.53	8.37	9.24	8.32	6.98	6.87	6.55	14.48	15.63	15.14	1.4719e-41	7.40023e-41
Bv6_135250_sqjx	blue	421.58	PREDICTED: dual specificity protein kinase splA [Beta vulgaris subsp. vulgaris]	GO:0003674(molecular_function);GO:0005634(nucleus);GO:0008150(biological_process)	NA	NA	NA	2.84	2.74	2.63	6.63	5.31	4.91	4.26	4.15	4.56	5.66	5.4	4.76	11.48	10.05	12.82	5.09508e-37	2.28859e-36
Bv4_096840_ajge	blue	421.357	PREDICTED: uncharacterized protein LOC104907727 [Beta vulgaris subsp. vulgaris]	NA	NA	NA	NA	0.05	0.08	0	4.37	5.46	4.36	0	0	0.11	5.12	4.79	5.64	19.26	16.27	18.02	0	0
Bv9_225500_xmmp	blue	421.207	PREDICTED: LOB domain-containing protein 1 [Beta vulgaris subsp. vulgaris]	GO:0005634(nucleus);GO:0005739(mitochondrion);GO:0008150(biological_process)	NA	NA	NA	2.88	2.14	3.04	5.78	6.19	4.46	30.09	24.8	28.91	34.58	32.42	29.7	41.89	35.21	40.86	8.27735e-172	2.23638e-170
Bv1_009930_izrp	blue	421.069	cytosolic sulfotransferase 5-like [Spinacia oleracea]	GO:0005737(cytoplasm);GO:0008146(sulfotransferase activity);GO:0009507(chloroplast);GO:0009694(jasmonic acid metabolic process);GO:0009753(response to jasmonic acid);GO:0080131(hydroxyjasmonate sulfotransferase activity)	NA	NA	NA	1.62	2.13	1.48	0.46	0.54	0.6	0.93	1.29	1.06	2.22	1.91	1.91	3.94	3.47	3.57	7.05313e-29	2.56859e-28
Bv6_136570_ussu	blue	420.971	PREDICTED: ureide permease 1 isoform X1 [Beta vulgaris subsp. vulgaris];PREDICTED: ureide permease 2 isoform X2 [Beta vulgaris subsp. vulgaris]	GO:0005274(allantoin:proton symporter activity);GO:0005524(ATP binding);GO:0005886(plasma membrane);GO:0015210(uracil transmembrane transporter activity);GO:0015505(uracil:cation symporter activity);GO:0015720(allantoin transport);GO:0015857(uracil transport);GO:0016021(integral component of membrane);GO:0022857(transmembrane transporter activity);GO:0043100(pyrimidine nucleobase salvage);GO:0071…	NA	NA	NA	2.45	2.46	2.55	3.54	3.4	3.4	13.83	13.54	13.32	10.02	9.62	9.79	17.38	14.77	15.63	3.34065e-198	1.09294e-196
Bv8_189531z2877	blue	420.674	hypothetical protein BVRB_1g010990 [Beta vulgaris subsp. vulgaris]	NA	NA	NA	NA	0.53	0.82	0.83	0.39	0.52	0.25	1.38	1.44	1.08	0.65	1.37	1.1	1.95	1.95	2	9.81829e-06	1.33427e-05
Bv3_058440_toia	blue	419.6	PREDICTED: thioredoxin-like 1-1, chloroplastic [Beta vulgaris subsp. vulgaris]	GO:0000103(sulfate assimilation);GO:0006457(protein folding);GO:0009507(chloroplast);GO:0015035(protein disulfide oxidoreductase activity);GO:0016671(oxidoreductase activity, acting on a sulfur group of donors, disulfide as acceptor);GO:0034599(cellular response to oxidative stress);GO:0045454(cell redox homeostasis);GO:0055114(oxidation-reduction process)	NA	NA	NA	15.43	16.19	16.84	23.46	23.56	24.1	53.63	56.13	55.87	36.83	37.37	36.3	69.6	64.63	64.39	4.27299e-193	1.34185e-191
Bv9_213180_ixku	blue	419.427	PREDICTED: lysine histidine transporter-like 7 [Beta vulgaris subsp. vulgaris]	GO:0003333(amino acid transmembrane transport);GO:0015171(amino acid transmembrane transporter activity)	NA	NA	NA	2.12	1.58	2.81	1.19	1.47	0.47	2.77	2.27	1.96	2.44	2.64	1.94	5.35	4.91	4.18	5.86985e-08	9.13116e-08
Bv8_193740_apou	blue	418.811	PREDICTED: uncharacterized protein LOC104901980 [Beta vulgaris subsp. vulgaris]	NA	NA	NA	NA	2.96	3.68	3.16	0.46	0.34	1.48	4.75	3.55	2.96	4.88	5.79	5.7	9.45	7.07	7.81	1.89811e-18	4.89953e-18
Bv7_173670_ugqo	blue	418.558	PREDICTED: scarecrow-like protein 30 [Beta vulgaris subsp. vulgaris]	GO:0003700(DNA binding transcription factor activity);GO:0005634(nucleus);GO:0006355(regulation of transcription, DNA-templated);GO:0043565(sequence-specific DNA binding)	04075(Plant hormone signal transduction)	K14494	NA	3.74	3.86	4.08	3.92	4.18	3.97	6.73	5.11	6.63	7.39	7.18	6.77	8.91	7.94	7.73	1.2699e-13	2.64658e-13
Bv1_007600_pdws	blue	418.461	PREDICTED: uncharacterized protein LOC104891131 [Beta vulgaris subsp. vulgaris]	GO:0003674(molecular_function);GO:0005575(cellular_component);GO:0008150(biological_process)	NA	NA	NA	9.65	11.71	9.09	14.21	15.13	14.92	34.01	34.75	30.72	22.79	21.19	20.86	38.75	40.13	43.58	1.62059e-74	1.49543e-73
Bv2_029500_nmdf	blue	418.125	PREDICTED: uncharacterized protein LOC104907998 [Beta vulgaris subsp. vulgaris]	GO:0003674(molecular_function);GO:0005739(mitochondrion);GO:0008150(biological_process);GO:0016021(integral component of membrane)	NA	NA	NA	14.79	18.32	18.8	25.65	23.59	24.56	25.44	27.7	26.59	27.73	26.59	26.09	38.22	32.51	42.27	5.49224e-15	1.21859e-14
Bv4_077540_ottz	blue	418.114	hypothetical protein BVRB_4g077540 [Beta vulgaris subsp. vulgaris]	NA	NA	NA	NA	1.19	1.21	1.14	0.93	0.85	0.72	4.25	4.24	3.65	2.94	3.21	2.56	4.34	5.2	5.88	4.84006e-82	4.99381e-81
Bv7_179280_esqh	blue	417.582	PREDICTED: ras-related protein RABC2a [Beta vulgaris subsp. vulgaris]	GO:0003924(GTPase activity);GO:0005515(protein binding);GO:0005525(GTP binding);GO:0005777(peroxisome);GO:0005794(Golgi apparatus);GO:0005886(plasma membrane);GO:0015031(protein transport);GO:0030742(GTP-dependent protein binding);GO:0080115(myosin XI tail binding)	NA	NA	NA	23.51	29.7	28.8	26.27	27.12	26.91	56.96	64.59	61.5	63.66	60	55.14	73.02	72.2	71.36	1.59973e-90	1.84523e-89
Bv2_035280_hndn	blue	416.941	PREDICTED: gamma-glutamylcyclotransferase 2-1 [Beta vulgaris subsp. vulgaris]	GO:0003839(gamma-glutamylcyclotransferase activity);GO:0005737(cytoplasm);GO:0006751(glutathione catabolic process);GO:0010288(response to lead ion);GO:0016829(lyase activity);GO:0046686(response to cadmium ion)	00480(Glutathione metabolism)	K22596	EC:4.3.2.9	210.03	228.21	242.93	557.41	545.71	555.76	349.43	348.47	346.51	486.25	469.58	484.61	1221.27	1097.33	1157.46	3.72658e-32	1.48518e-31
Bv3_059940_hmgk	blue	416.819	PREDICTED: protein PFC0760c [Beta vulgaris subsp. vulgaris]	GO:0003674(molecular_function);GO:0005634(nucleus);GO:0008150(biological_process);GO:0016021(integral component of membrane)	NA	NA	NA	2.32	1.82	2.13	2.96	2.08	2.6	2.21	2.01	2.7	3.46	3.55	3.69	5.22	5.01	4.81	1.96366e-14	4.25353e-14
Bv5_105790_ryzh	blue	416.668	PREDICTED: probable purine permease 11 [Beta vulgaris subsp. vulgaris]	GO:0005345(purine nucleobase transmembrane transporter activity);GO:0006863(purine nucleobase transport);GO:0009507(chloroplast);GO:0016020(membrane);GO:0016021(integral component of membrane)	NA	NA	NA	6.34	7.81	7.88	7.14	7.51	7.57	30.3	29.4	30.47	20	20.21	19.42	36.11	32.71	36.8	1.81482e-214	6.50514e-213
Bv3_067290_hcfe	blue	416.655	PREDICTED: probable carboxylesterase 120 [Beta vulgaris subsp. vulgaris]	GO:0005634(nucleus);GO:0009056(catabolic process);GO:0016787(hydrolase activity);GO:0052689(carboxylic ester hydrolase activity)	04075(Plant hormone signal transduction)	K14493	EC:3.-.-.-	8.04	9.05	8.33	3.9	3.88	4.03	11.21	12.56	12.95	8.77	9.11	9.01	15.42	17.67	19.1	2.47475e-63	1.87419e-62
Bv7_170550_ywig	blue	416.611	PREDICTED: cell wall / vacuolar inhibitor of fructosidase 1 [Beta vulgaris subsp. vulgaris]	GO:0004857(enzyme inhibitor activity)	NA	NA	NA	7.48	9.62	10.62	41.12	37.04	38.45	53.46	56.51	62.07	75.35	84.17	90.72	98.4	104.9	114.13	2.43422e-142	5.08136e-141
Bv7_158770_qjpf	blue	416.518	PREDICTED: putative disease resistance protein RGA3 [Beta vulgaris subsp. vulgaris]	NA	NA	NA	NA	73.75	84.65	81.49	86.63	89.42	84.27	62.89	66.6	61.22	37.5	32.69	33.11	23.02	20.79	20.71	1.25606e-152	2.87918e-151
Bv4_087280_ccpa	blue	416.18	PREDICTED: PAP-specific phosphatase HAL2-like [Beta vulgaris subsp. vulgaris]	GO:0000287(magnesium ion binding);GO:0005737(cytoplasm);GO:0008441(3'(2'),5'-bisphosphate nucleotidase activity)	00920(Sulfur metabolism)	K01082	EC:3.1.3.7	5.33	5.75	5.75	12.77	12.21	10.78	13.27	12.99	12.82	11.05	12.05	12.2	19.78	20.04	22.67	5.75881e-57	3.90004e-56
Bv6_153830_pdmn	blue	415.712	PREDICTED: ribonuclease 1 [Beta vulgaris subsp. vulgaris]	GO:0003723(RNA binding);GO:0004521(endoribonuclease activity);GO:0004540(ribonuclease activity);GO:0005576(extracellular region);GO:0005618(cell wall);GO:0005886(plasma membrane);GO:0007568(aging);GO:0009611(response to wounding);GO:0009718(anthocyanin-containing compound biosynthetic process);GO:0009867(jasmonic acid mediated signaling pathway);GO:0016036(cellular response to phosphate starvatio…	NA	NA	NA	45.23	48.1	53.49	20.77	22.41	22.9	78.54	75.37	76.84	66.84	64.61	69.62	108.33	90.7	99.5	5.79965e-70	4.92027e-69
Bv3_066900_madm	blue	415.656	hypothetical protein BVRB_3g066900 [Beta vulgaris subsp. vulgaris]	GO:0000228(nuclear chromosome);GO:0000710(meiotic mismatch repair);GO:0003684(damaged DNA binding);GO:0007131(reciprocal meiotic recombination);GO:0030983(mismatched DNA binding);GO:0032300(mismatch repair complex)	03430(Mismatch repair)	K08736	NA	2.89	2.6	2.49	0.95	0.61	1.02	2.37	2.89	2.76	3.54	3.84	4.13	5.26	5.82	5.4	5.81963e-41	2.88401e-40
Bv7_166460_turi	blue	415.333	PREDICTED: glutathione transferase GST 23 [Beta vulgaris subsp. vulgaris]	GO:0004364(glutathione transferase activity);GO:0005737(cytoplasm);GO:0006749(glutathione metabolic process);GO:0009407(toxin catabolic process)	00480(Glutathione metabolism)	K00799	EC:2.5.1.18	10.79	12.82	7.47	14.02	17.6	15.68	40.32	31.46	26.32	33.01	36.1	35	48.79	47.47	40.21	2.03765e-35	8.77162e-35
Bv3_053740_wtqc	blue	415.286	PREDICTED: beta-D-xylosidase 1 [Beta vulgaris subsp. vulgaris]	GO:0009044(xylan 1,4-beta-xylosidase activity);GO:0009505(plant-type cell wall);GO:0031222(arabinan catabolic process);GO:0045493(xylan catabolic process);GO:0046556(alpha-L-arabinofuranosidase activity)	00520(Amino sugar and nucleotide sugar metabolism)	K15920	EC:3.2.1.37	128.41	151.75	155.94	87.53	88.22	88.64	14.89	13.59	15.76	78.46	70.62	74.46	663.87	578.5	639.39	0	0
Bv1_002960_mets	blue	414.415	PREDICTED: cyclic pyranopterin monophosphate synthase accessory protein, mitochondrial [Beta vulgaris subsp. vulgaris]	GO:0032324(molybdopterin cofactor biosynthetic process)	00790(Folate biosynthesis);04122(Sulfur relay system)	K03637	EC:4.6.1.17	7.99	9.8	9.16	11.76	11.87	11.59	15.36	13.53	14.89	16.84	16.04	14.44	18.37	19.7	17.85	4.68745e-18	1.19166e-17
Bv5_115930_imcm	blue	414.335	PREDICTED: transcription factor MYB1R1 [Beta vulgaris subsp. vulgaris]	GO:0003682(chromatin binding);GO:0003700(DNA binding transcription factor activity);GO:0003713(transcription coactivator activity);GO:0004402(histone acetyltransferase activity);GO:0005634(nucleus);GO:0006338(chromatin remodeling);GO:0006357(regulation of transcription by RNA polymerase II);GO:0035066(positive regulation of histone acetylation)	NA	NA	NA	11.98	14.94	15.14	14.79	14.49	14.36	28.67	30.12	28.61	25.32	26.19	25.96	33.8	31.19	32.47	2.46333e-63	1.86632e-62
Bv9_208950_wdgr	blue	414.287	PREDICTED: RING finger protein mug145 [Beta vulgaris subsp. vulgaris]	GO:0000209(protein polyubiquitination);GO:0043161(proteasome-mediated ubiquitin-dependent protein catabolic process);GO:0061630(ubiquitin protein ligase activity)	NA	NA	NA	8.62	11.75	8.21	18.03	18.98	17.14	35.5	35.93	31.11	38.68	40.96	41.98	47.83	44.44	49.16	1.70293e-70	1.45501e-69
Bv1_005510_iqjh	blue	414.151	PREDICTED: protein DYAD isoform X2 [Beta vulgaris subsp. vulgaris]	GO:0005634(nucleus);GO:0007065(male meiosis sister chromatid cohesion);GO:0007066(female meiosis sister chromatid cohesion);GO:0007131(reciprocal meiotic recombination);GO:0007275(multicellular organism development)	03008(Ribosome biogenesis in eukaryotes)	K14536	EC:3.6.5.-	0.31	0.54	0.42	0.5	0.28	0.46	0.31	0.06	0.44	0.98	1.07	0.96	1.66	2.29	2.26	1.79157e-10	3.21315e-10
Bv7_179830_ytkf	blue	414.036	PREDICTED: uncharacterized protein LOC104908930 isoform X1 [Beta vulgaris subsp. vulgaris];PREDICTED: uncharacterized protein LOC104908930 isoform X2 [Beta vulgaris subsp. vulgaris]	GO:0003674(molecular_function);GO:0005576(extracellular region);GO:0008150(biological_process);GO:0008150(biological_process)	NA	NA	NA	84.49	94.42	90.55	82.91	77.44	76.81	60.01	61.45	60.69	78.79	82.64	81.74	35.33	31.17	35.87	1.45198e-77	1.40166e-76
Bv5_126170_myrq	blue	413.584	PREDICTED: uncharacterized protein LOC104908245 [Beta vulgaris subsp. vulgaris]	GO:0003674(molecular_function);GO:0008150(biological_process);GO:0016021(integral component of membrane)	NA	NA	NA	0.77	0.71	0.47	2.19	2.14	2.06	4.28	3.95	4.03	3.45	2.93	2.86	5.17	5.21	5.41	4.33764e-73	3.90257e-72
Bv6_135130_jtuw	blue	413.488	PREDICTED: CMP-sialic acid transporter 5 [Beta vulgaris subsp. vulgaris]	GO:0000139(Golgi membrane);GO:0005338(nucleotide-sugar transmembrane transporter activity);GO:0005351(carbohydrate:proton symporter activity);GO:0005463(UDP-N-acetylgalactosamine transmembrane transporter activity);GO:0005783(endoplasmic reticulum);GO:0008643(carbohydrate transport);GO:0009507(chloroplast);GO:0010584(pollen exine formation);GO:0015780(nucleotide-sugar transmembrane transport);GO:…	NA	NA	NA	4.46	5.9	5.53	6.37	5.63	5.69	7.95	8.02	8.33	10.63	10.28	10.65	12.55	10.56	11.76	1.60513e-27	5.6083e-27
Bv9_221880_kecu	blue	413.484	PREDICTED: ethylene-responsive transcription factor ERF039 [Beta vulgaris subsp. vulgaris]	GO:0003677(DNA binding);GO:0003700(DNA binding transcription factor activity);GO:0005634(nucleus);GO:0006351(transcription, DNA-templated);GO:0006355(regulation of transcription, DNA-templated);GO:0009873(ethylene-activated signaling pathway);GO:0043565(sequence-specific DNA binding);GO:0045893(positive regulation of transcription, DNA-templated)	NA	NA	NA	6.97	9.22	7.44	6.57	5.15	5.88	25.45	22.46	20.98	20.03	16.44	17.17	27.07	28.51	26.79	8.54576e-61	6.1955e-60
Bv1_006500_ooma	blue	413.335	PREDICTED: ervatamin-B [Beta vulgaris subsp. vulgaris]	GO:0004197(cysteine-type endopeptidase activity);GO:0005615(extracellular space);GO:0005764(lysosome);GO:0051603(proteolysis involved in cellular protein catabolic process)	NA	NA	NA	11.68	12.97	12.44	15.68	14.61	16.11	18.49	17.55	17.65	24	23.01	23.39	29.49	24.32	25.92	8.26313e-49	4.82279e-48
Bv9_215460_osrs	blue	413.22	hypothetical protein BVRB_9g215460 [Beta vulgaris subsp. vulgaris]	GO:0005886(plasma membrane);GO:0016021(integral component of membrane);GO:0042626(ATPase activity, coupled to transmembrane movement of substances)	02010(ABC transporters)	K05681	NA	0.59	0.86	1.55	2.6	1.96	2.03	4.42	6.51	5.1	8.89	7.23	6.87	9.51	8.19	10.01	6.852e-36	2.98462e-35
Bv9_213110_jeoe	blue	413.076	hypothetical protein BVRB_9g213110 [Beta vulgaris subsp. vulgaris]	GO:0009926(auxin polar transport);GO:0046620(regulation of organ growth)	04075(Plant hormone signal transduction)	K14488	NA	1.12	1.74	1.6	0.69	0.72	1.17	1.8	1.36	1.04	1.31	1.63	1.7	8.85	6.5	4.98	2.69829e-15	6.0752e-15
Bv_006590_dsgf	blue	412.959	PREDICTED: vesicle transport protein SEC20 [Beta vulgaris subsp. vulgaris]	GO:0003674(molecular_function);GO:0005737(cytoplasm)	04130(SNARE interactions in vesicular transport)	K08497	NA	10.19	12.03	11.44	16.25	18.27	17.73	19.88	20.14	20.9	18.88	17.95	19.68	26.82	25.64	26.29	2.43123e-25	7.95556e-25
Bv1_001580_oetf	blue	412.781	hypothetical protein BVRB_1g001580 [Beta vulgaris subsp. vulgaris]	GO:0005515(protein binding);GO:0005524(ATP binding);GO:0005622(intracellular);GO:0005623(cell);GO:0005634(nucleus);GO:0005739(mitochondrion);GO:0005829(cytosol);GO:0006457(protein folding);GO:0009408(response to heat);GO:0009409(response to cold);GO:0009507(chloroplast);GO:0009532(plastid stroma);GO:0009570(chloroplast stroma);GO:0009579(thylakoid);GO:0009941(chloroplast envelope);GO:0016032(vira…	03040(Spliceosome);04141(Protein processing in endoplasmic reticulum);04144(Endocytosis)	K03283	NA	0.5	0.37	0.42	2.54	3.03	2.8	3.9	3.73	3.54	7.3	7.56	7.7	8.6	10.78	10.26	8.0463e-167	2.09833e-165
Bv3_051980_suui	blue	412.506	hypothetical protein BVRB_3g051980 [Beta vulgaris subsp. vulgaris]	GO:0003924(GTPase activity);GO:0005622(intracellular);GO:0006412(translation)	NA	NA	NA	14.29	17.27	17.07	20.45	23.85	23.31	15.79	18.55	17.38	12.32	13.39	12.58	5.75	5.69	6.22	2.63225e-83	2.75696e-82
Bv7_180370_scdu	blue	412.294	PREDICTED: EID1-like F-box protein 3 [Beta vulgaris subsp. vulgaris]	GO:0005634(nucleus);GO:0006970(response to osmotic stress);GO:0009414(response to water deprivation);GO:0009651(response to salt stress);GO:0009737(response to abscisic acid);GO:0009738(abscisic acid-activated signaling pathway);GO:0010029(regulation of seed germination);GO:0010228(vegetative to reproductive phase transition of meristem)	NA	NA	NA	4.09	3.63	3.86	18.01	20.38	17.89	31.57	31.96	30.06	39.51	42.17	38.29	49.65	49.56	48.55	3.59356e-227	1.44014e-225
Bv8_187810_tkyx	blue	412.232	hypothetical protein BVRB_8g187810 [Beta vulgaris subsp. vulgaris]	GO:0016787(hydrolase activity)	NA	NA	NA	8.02	7.05	6.65	2.69	2.63	1.69	8.02	8.43	8.36	6.94	7.22	5.43	15.41	14.72	12.61	7.95178e-37	3.54872e-36
Bv4_087630_icdw	blue	412.08	PREDICTED: stem-specific protein TSJT1 [Beta vulgaris subsp. vulgaris]	GO:0004066(asparagine synthase (glutamine-hydrolyzing) activity);GO:0005829(cytosol);GO:0006529(asparagine biosynthetic process);GO:0006541(glutamine metabolic process);GO:0042803(protein homodimerization activity)	NA	NA	NA	65.84	72.12	79.18	97.48	98.67	96.77	193.7	199.86	203.93	151.21	142.08	150.3	236.42	220.68	227.17	1.62329e-26	5.50708e-26
Bv6_153950_iwgm	blue	411.972	PREDICTED: uncharacterized protein LOC104897920 [Beta vulgaris subsp. vulgaris]	GO:0003723(RNA binding);GO:0003735(structural constituent of ribosome);GO:0006412(translation);GO:0022625(cytosolic large ribosomal subunit);GO:0042254(ribosome biogenesis)	NA	NA	NA	3.67	4.48	4.65	4.81	3.56	4.11	10.29	9.54	9.86	11.42	10.76	10.51	11.39	13.01	14.47	3.38399e-50	2.02432e-49
Bv3_059510_yhoo	blue	411.805	PREDICTED: cell division cycle 20.1, cofactor of APC complex [Beta vulgaris subsp. vulgaris]	GO:0005515(protein binding);GO:0005634(nucleus);GO:0005834(heterotrimeric G-protein complex);GO:0007049(cell cycle);GO:0007165(signal transduction);GO:0010997(anaphase-promoting complex binding);GO:0016567(protein ubiquitination);GO:0019900(kinase binding);GO:0033597(mitotic checkpoint complex);GO:0051301(cell division);GO:0097027(ubiquitin-protein transferase activator activity);GO:1904668(posit…	04120(Ubiquitin mediated proteolysis)	K03363	NA	1.27	1.57	2.06	2.06	2.08	2.19	2.33	1.61	2.03	3.07	2.85	3.37	4.61	4.24	3.96	2.11061e-12	4.15154e-12
Bv1_003090_gpxp	blue	411.762	hypothetical protein BVRB_1g003090 isoform A [Beta vulgaris subsp. vulgaris];PREDICTED: cytochrome b561 and DOMON domain-containing protein At3g61750 isoform X1 [Beta vulgaris subsp. vulgaris];PREDICTED: cytochrome b561 and DOMON domain-containing protein At3g61750 isoform X2 [Beta vulgaris subsp. vulgaris]	GO:0005576(extracellular region);GO:0016020(membrane);GO:0016021(integral component of membrane);GO:0046872(metal ion binding);GO:0055114(oxidation-reduction process);GO:0055114(oxidation-reduction process)	NA	NA	NA	1.55	1.82	2.43	2.88	4.39	1.76	6.53	5.99	5.33	7.99	8.07	6.1	9.97	7.67	11.58	5.41732e-16	1.25975e-15
Bv6_139830_frdk	blue	411.446	hypothetical protein BVRB_6g139830 [Beta vulgaris subsp. vulgaris]	NA	NA	NA	NA	0.57	0.6	0.68	0.61	0.97	0.6	0.88	0.93	0.61	0.82	0.56	1.22	1.82	1.99	2.5	2.14952e-07	3.23669e-07
Bv5_106500_pdus	blue	411.243	PREDICTED: aluminum-activated malate transporter 12 [Beta vulgaris subsp. vulgaris]	GO:0009705(plant-type vacuole membrane);GO:0015140(malate transmembrane transporter activity)	NA	NA	NA	2.66	1.58	1.9	0.22	0.77	1.08	3.41	3.05	3.65	5	3.69	3.9	5.69	6.47	5.43	2.30773e-18	5.93642e-18
Bv2_046950_hasi	blue	411.116	PREDICTED: NAC domain-containing protein 92 [Beta vulgaris subsp. vulgaris]	GO:0003677(DNA binding);GO:0003700(DNA binding transcription factor activity);GO:0005634(nucleus);GO:0006351(transcription, DNA-templated);GO:0006355(regulation of transcription, DNA-templated);GO:0007275(multicellular organism development)	03013(RNA transport);03015(mRNA surveillance pathway);03018(RNA degradation)	K13126	NA	0.23	0.16	0.13	0.18	0.23	0.35	0.21	0.05	0.33	0.47	0.15	0.37	1.06	1.43	1.18	1.55797e-07	2.36177e-07
Bv9_208260_etyd	blue	410.961	PREDICTED: uncharacterized protein LOC104903267 [Beta vulgaris subsp. vulgaris]	NA	NA	NA	NA	29.34	36.97	29.48	14.47	14.02	12.72	29.07	28.2	21.43	31.04	27.41	28.63	52.73	53.24	53.21	2.05391e-41	1.02947e-40
Bv4_084280_wqeg	blue	410.773	PREDICTED: B3 domain-containing protein REM16 isoform X2 [Beta vulgaris subsp. vulgaris]	GO:0003677(DNA binding);GO:0003700(DNA binding transcription factor activity);GO:0005634(nucleus);GO:0005773(vacuole);GO:0006351(transcription, DNA-templated);GO:0006355(regulation of transcription, DNA-templated)	NA	NA	NA	1.09	1.5	1.11	3.23	3.17	3.75	5.57	5.58	6.54	5.75	6.66	5.88	8.37	7.72	7.81	9.4586e-65	7.35515e-64
Bv1_022470_xcou	blue	409.378	PREDICTED: uncharacterized protein LOC104905824 [Beta vulgaris subsp. vulgaris]	GO:0005618(cell wall);GO:0005773(vacuole);GO:0008150(biological_process)	NA	NA	NA	3.76	3.89	4.26	5.92	6.36	5.66	8.09	7.93	8.1	10.27	10.04	9.95	10.57	11.82	12.23	1.43464e-77	1.38566e-76
Bv4_085120_trif	blue	408.885	PREDICTED: protein trichome birefringence-like 41 isoform X1 [Beta vulgaris subsp. vulgaris]	GO:0005794(Golgi apparatus);GO:0016413(O-acetyltransferase activity);GO:0071554(cell wall organization or biogenesis)	NA	NA	NA	10.84	11.1	10.93	13.73	13.5	13.09	19.74	19.59	17.24	15.01	15.77	13.07	22.39	23.7	22.91	6.74977e-32	2.66876e-31
Bv1_018290_azxk	blue	408.324	PREDICTED: carotenoid cleavage dioxygenase 7, chloroplastic isoform X1 [Beta vulgaris subsp. vulgaris]	GO:0009733(response to auxin);GO:0010223(secondary shoot formation);GO:0016121(carotene catabolic process);GO:0016702(oxidoreductase activity, acting on single donors with incorporation of molecular oxygen, incorporation of two atoms of oxygen);GO:0045549(9-cis-epoxycarotenoid dioxygenase activity);GO:1901601(strigolactone biosynthetic process)	00906(Carotenoid biosynthesis)	K17912	EC:1.13.11.68	0.44	0.6	0.48	0	0.05	0.2	0.52	0.1	0.28	0.92	0.31	0.18	2.5	1.74	1.79	3.5229e-08	5.54846e-08
Bv6_148680_pnhi	blue	408.219	PREDICTED: polygalacturonase At1g48100 [Beta vulgaris subsp. vulgaris]	GO:0004650(polygalacturonase activity);GO:0005576(extracellular region);GO:0005975(carbohydrate metabolic process)	00040(Pentose and glucuronate interconversions)	K01184	EC:3.2.1.15	31.65	31.8	31.78	8.19	7.78	7.63	38.04	38.31	34.59	40.72	36.94	38.03	60.76	55.99	58.67	8.44399e-262	4.32881e-260
Bv3_068090_nzrr	blue	407.149	PREDICTED: oleosin 1 [Beta vulgaris subsp. vulgaris]	GO:0005576(extracellular region);GO:0019915(lipid storage);GO:0019953(sexual reproduction)	NA	NA	NA	0	0.03	0.03	0.19	0.2	0.16	1.93	2.25	1.81	0.98	1.24	0.97	2.54	2.43	2.44	2.1908e-145	4.7042e-144
Bv2_040530_tyiu	blue	406.859	PREDICTED: probable xyloglucan endotransglucosylase/hydrolase protein 23 [Beta vulgaris subsp. vulgaris]	GO:0004553(hydrolase activity, hydrolyzing O-glycosyl compounds);GO:0005576(extracellular region);GO:0005618(cell wall);GO:0005794(Golgi apparatus);GO:0010411(xyloglucan metabolic process);GO:0016762(xyloglucan:xyloglucosyl transferase activity);GO:0016798(hydrolase activity, acting on glycosyl bonds);GO:0042546(cell wall biogenesis);GO:0048046(apoplast);GO:0071555(cell wall organization)	04075(Plant hormone signal transduction)	K14504	EC:2.4.1.207	190.97	215.35	217.69	185.08	188.41	182.9	98.37	95.92	94.82	170.76	168.63	171.53	40.15	37.13	41.7	5.0344e-64	3.87298e-63
Bv8_193090_kary	blue	406.7	PREDICTED: ATP-citrate synthase beta chain protein 2 [Beta vulgaris subsp. vulgaris]	GO:0003878(ATP citrate synthase activity);GO:0005524(ATP binding);GO:0005737(cytoplasm);GO:0005829(cytosol);GO:0005886(plasma membrane);GO:0006085(acetyl-CoA biosynthetic process);GO:0006629(lipid metabolic process);GO:0009346(citrate lyase complex);GO:0046872(metal ion binding)	00020(Citrate cycle (TCA cycle))	K01648	EC:2.3.3.8	3.29	3.16	2.96	13.35	12.35	12.3	21.73	17.63	19.33	2.01	2.31	1.85	70.55	57.98	56.73	0	0
Bv2_044740_efmk	blue	406.415	PREDICTED: peroxisomal membrane protein 11-4 [Beta vulgaris subsp. vulgaris]	GO:0005778(peroxisomal membrane);GO:0016559(peroxisome fission);GO:0044375(regulation of peroxisome size)	04146(Peroxisome)	K13352	NA	19.85	21.76	19.49	8.67	10.13	10.71	15.55	16.27	16.4	16.69	17.44	16.84	31.29	31.06	33.23	1.90609e-54	1.23109e-53
Bv4_077950_drsg	blue	406.004	PREDICTED: uncharacterized protein LOC104890705 [Beta vulgaris subsp. vulgaris]	NA	NA	NA	NA	0	0.1	0	0.32	0.13	0.07	0.35	0.57	1.1	1.12	1.43	0.82	1.71	2.45	1.7	3.38386e-14	7.23064e-14
Bv8_197700_kkcn	blue	405.964	PREDICTED: profilin [Beta vulgaris subsp. vulgaris]	GO:0003785(actin monomer binding);GO:0005938(cell cortex);GO:0015629(actin cytoskeleton);GO:0042989(sequestering of actin monomers)	NA	NA	NA	0.7	0.51	0.47	5.28	3.09	5.03	2.54	4.34	4.14	6.3	4.84	5.14	12.38	14.14	10.4	1.1021e-37	5.02819e-37
Bv1_014770_yfdk	blue	405.68	PREDICTED: uncharacterized protein LOC104901805 [Beta vulgaris subsp. vulgaris]	GO:0009507(chloroplast);GO:0016021(integral component of membrane)	NA	NA	NA	4.34	4.43	5.83	5.72	6.26	5.15	4.5	4.77	5.98	7.5	6.94	6.77	10.31	9.06	10.9	1.01645e-12	2.03133e-12
Bv6_149640_good	blue	405.563	hypothetical protein BVRB_6g149640 [Beta vulgaris subsp. vulgaris]	NA	NA	NA	NA	0	0.01	0.16	1.38	1.51	0.78	1.17	1.03	0.78	1.92	2.6	2.31	3.99	3.29	3.5	8.04142e-32	3.17528e-31
Bv5_114100_nsqa	blue	405.382	PREDICTED: probable LRR receptor-like serine/threonine-protein kinase At1g74360 [Beta vulgaris subsp. vulgaris]	GO:0002215(defense response to nematode);GO:0004674(protein serine/threonine kinase activity);GO:0005524(ATP binding);GO:0005739(mitochondrion);GO:0005886(plasma membrane);GO:0006468(protein phosphorylation);GO:0007169(transmembrane receptor protein tyrosine kinase signaling pathway);GO:0009506(plasmodesma);GO:0016021(integral component of membrane);GO:0031966(mitochondrial membrane)	04075(Plant hormone signal transduction)	K13415	EC:2.7.10.1;EC:2.7.11.1	15.06	16.14	17.07	24.63	24.91	25.31	12.8	11.07	11.3	11.99	12.71	11.31	4.24	4.21	3.98	1.23138e-114	1.93514e-113
Bv5_120740_itgz	blue	404.126	PREDICTED: general transcription factor 3C polypeptide 3 isoform X1 [Beta vulgaris subsp. vulgaris];PREDICTED: general transcription factor 3C polypeptide 3 isoform X2 [Beta vulgaris subsp. vulgaris]	GO:0005634(nucleus);GO:0005634(nucleus)	NA	NA	NA	0	0.83	0.32	1.36	1.9	0.84	2.36	4.92	3.06	5.93	5.39	3.95	8.7	6.35	6.23	1.85489e-15	4.19887e-15
Bv7_172710_qhei	blue	403.892	PREDICTED: AT-rich interactive domain-containing protein 2 [Beta vulgaris subsp. vulgaris]	GO:0003677(DNA binding);GO:0003916(DNA topoisomerase activity);GO:0003918(DNA topoisomerase type II (ATP-hydrolyzing) activity);GO:0005524(ATP binding);GO:0005634(nucleus);GO:0006259(DNA metabolic process);GO:0006265(DNA topological change);GO:0007059(chromosome segregation);GO:0009295(nucleoid)	NA	NA	NA	16.02	19.12	15.82	23.74	26.18	20.67	33.03	34.61	29.93	24.15	24.32	26.31	44.03	37.46	45.21	1.93322e-17	4.78821e-17
Bv5_127070_crpg	blue	403.782	PREDICTED: probable calcium-binding protein CML15 [Beta vulgaris subsp. vulgaris]	GO:0005509(calcium ion binding)	04626(Plant-pathogen interaction)	K13448	NA	24.36	24.03	25.17	18.56	16.66	15.35	14.43	13.18	11.77	11.74	13.72	11.16	3.89	5.29	6.66	1.00375e-36	4.46291e-36
Bv2_029310_hkpo	blue	403.692	PREDICTED: polygalacturonase QRT2 [Beta vulgaris subsp. vulgaris]	GO:0004650(polygalacturonase activity);GO:0005576(extracellular region);GO:0005618(cell wall);GO:0005975(carbohydrate metabolic process);GO:0009830(cell wall modification involved in abscission);GO:0009901(anther dehiscence);GO:0010047(fruit dehiscence);GO:0045490(pectin catabolic process);GO:0048235(pollen sperm cell differentiation)	00040(Pentose and glucuronate interconversions)	K01184	EC:3.2.1.15	1.61	1.52	1.58	2.52	1.73	1.79	9.04	6.35	7.94	7.97	8.62	7.99	10.68	9.64	10.05	1.17855e-62	8.82878e-62
Bv1_012950_cfmo	blue	403.62	hypothetical protein BVRB_1g012950 [Beta vulgaris subsp. vulgaris]	GO:0004497(monooxygenase activity)	NA	NA	NA	3.73	5.09	4.4	3.84	3.02	4.13	3.27	2.79	3.41	1.86	1.88	2.22	16.28	14.08	17.2	2.64128e-85	2.82564e-84
Bv2_040990_khce	blue	403.596	PREDICTED: pentatricopeptide repeat-containing protein At4g20740 [Beta vulgaris subsp. vulgaris]	GO:0003723(RNA binding);GO:0004519(endonuclease activity);GO:0005739(mitochondrion);GO:0009451(RNA modification);GO:0043231(intracellular membrane-bounded organelle)	NA	NA	NA	3.86	4.85	4.34	4.73	4.32	5.25	3.35	3.71	3.71	5.16	4.23	5.33	9.76	8.64	10.48	5.60229e-22	1.65204e-21
Bv5_122810_ypwf	blue	402.999	PREDICTED: L-lactate dehydrogenase B [Beta vulgaris subsp. vulgaris]	GO:0004457(lactate dehydrogenase activity);GO:0005737(cytoplasm);GO:0005829(cytosol);GO:0005886(plasma membrane);GO:0009651(response to salt stress);GO:0009737(response to abscisic acid)	00010(Glycolysis / Gluconeogenesis);00620(Pyruvate metabolism);00640(Propanoate metabolism);00270(Cysteine and methionine metabolism)	K00016	EC:1.1.1.27	75.2	91.24	88.37	108.68	105.03	111.78	54.49	57.66	53.73	58.23	58.09	57.37	32.41	30.9	35.24	8.357e-99	1.08029e-97
Bv5_126151z1757	blue	402.994	hypothetical protein BVRB_1g022930 [Beta vulgaris subsp. vulgaris]	NA	NA	NA	NA	1.26	0.79	0.75	0.86	0.37	0.38	0.46	0.43	0.82	1.84	1.88	1.91	3.09	2.77	3.5	1.18217e-19	3.19111e-19
Bv6_146950_xpym	blue	402.723	hypothetical protein BVRB_6g146950 [Beta vulgaris subsp. vulgaris]	NA	NA	NA	NA	22.6	25.71	24.22	8.48	8.37	8.89	42.99	40.5	42.28	33.78	31.99	32	57.27	49.16	53.73	1.0369e-210	3.65844e-209
Bv3_063450_oigm	blue	402.612	PREDICTED: protein NRT1/ PTR FAMILY 3.1 [Beta vulgaris subsp. vulgaris]	GO:0005215(transporter activity);GO:0005886(plasma membrane);GO:0006857(oligopeptide transport);GO:0010336(gibberellic acid homeostasis);GO:0016020(membrane);GO:0016021(integral component of membrane);GO:0022857(transmembrane transporter activity);GO:0042128(nitrate assimilation);GO:0055085(transmembrane transport);GO:0097708(intracellular vesicle)	NA	NA	NA	42.14	45.99	46.53	95.6	94.59	101.76	341.78	346.88	336.86	276.61	278.49	262.18	416.17	363.47	397.8	1.48046e-137	2.96653e-136
Bv9_204640_gcqh	blue	401.774	PREDICTED: glycine-rich protein 3 [Beta vulgaris subsp. vulgaris]	GO:0005515(protein binding);GO:0005576(extracellular region);GO:0008361(regulation of cell size);GO:0009269(response to desiccation);GO:0009723(response to ethylene);GO:0009737(response to abscisic acid);GO:0009751(response to salicylic acid);GO:0009826(unidimensional cell growth);GO:0010044(response to aluminum ion);GO:0048364(root development)	NA	NA	NA	2.77	2.68	1.86	3.15	1.58	3.53	8.6	10.02	10.9	15.3	15.33	15.22	17.96	17.17	16.72	1.33937e-47	7.6051e-47
Bv5_121690_pcei	blue	401.22	PREDICTED: DNA mismatch repair protein MSH6 [Beta vulgaris subsp. vulgaris]	GO:0000228(nuclear chromosome);GO:0000400(four-way junction DNA binding);GO:0000710(meiotic mismatch repair);GO:0003684(damaged DNA binding);GO:0007131(reciprocal meiotic recombination);GO:0009411(response to UV);GO:0032137(guanine/thymine mispair binding);GO:0032138(single base insertion or deletion binding);GO:0032301(MutSalpha complex);GO:0043570(maintenance of DNA repeat elements);GO:0045910(…	03430(Mismatch repair)	K08737	NA	18.05	21.76	24.12	10.58	10.45	10.61	17.9	19.85	19.24	27.72	26.84	27.73	37.46	34.75	37.42	3.14308e-47	1.7696e-46
Bv1_009680_xhdj	blue	400.842	PREDICTED: RNA-binding protein 7 [Beta vulgaris subsp. vulgaris]	GO:0003723(RNA binding);GO:0005634(nucleus);GO:0008150(biological_process)	03040(Spliceosome)	K12831	NA	12.46	11.65	13.34	20.21	18.45	16.51	19.39	18.09	19.47	21.95	23.25	23.63	34.27	26.99	28.11	1.00259e-20	2.81093e-20
Bv2_034950_jxjw	blue	400.038	PREDICTED: leucine-rich repeat extensin-like protein 4 [Beta vulgaris subsp. vulgaris]	GO:0000904(cell morphogenesis involved in differentiation);GO:0005199(structural constituent of cell wall);GO:0005576(extracellular region);GO:0009505(plant-type cell wall);GO:0009506(plasmodesma);GO:0009826(unidimensional cell growth);GO:0009927(histidine phosphotransfer kinase activity);GO:0010054(trichoblast differentiation);GO:0071555(cell wall organization)	NA	NA	NA	31.55	33.22	33.53	41.67	45.33	43.98	12.93	14.37	13.43	18.17	19.47	18.83	4.52	5.05	5.83	3.69165e-292	2.26715e-290
Bv7_162050_kzoe	blue	399.992	hypothetical protein BVRB_7g162050 [Beta vulgaris subsp. vulgaris]	NA	NA	NA	NA	0.71	0.24	0.28	0.39	0.21	0.32	0.46	0.2	0.7	1.22	2.04	1.5	2.26	2.83	2.81	1.11053e-13	2.32062e-13
Bv3_066950_itpc	blue	399.912	PREDICTED: fimbrin-5 [Beta vulgaris subsp. vulgaris]	GO:0005829(cytosol);GO:0005884(actin filament);GO:0009846(pollen germination);GO:0009860(pollen tube growth);GO:0030036(actin cytoskeleton organization);GO:0032432(actin filament bundle);GO:0051015(actin filament binding);GO:0051017(actin filament bundle assembly);GO:0051639(actin filament network formation);GO:0051764(actin crosslink formation)	NA	NA	NA	2.55	2.77	1.72	7.84	9.65	10.42	29.82	31.68	29.79	25.74	25.88	25.36	36.36	34.42	36.65	1.78918e-177	5.07001e-176
Bv3_052450_dyma	blue	399.718	PREDICTED: bidirectional sugar transporter SWEET3 [Beta vulgaris subsp. vulgaris]	GO:0008643(carbohydrate transport);GO:0016021(integral component of membrane);GO:0051119(sugar transmembrane transporter activity)	NA	NA	NA	0.12	0.13	0.07	0.99	0.69	0.84	3.48	3.7	2.73	2.45	3.11	2.53	4.84	3.95	3.75	3.46644e-75	3.22519e-74
Bv1_017100_ksmd	blue	399.365	PREDICTED: protein ECERIFERUM 1 [Beta vulgaris subsp. vulgaris]	GO:0005783(endoplasmic reticulum);GO:0010025(wax biosynthetic process);GO:0010143(cutin biosynthetic process);GO:0043668(exine);GO:0048653(anther development)	00073(Cutin, suberine and wax biosynthesis)	K15404	EC:4.1.99.5	1.29	1.23	1.11	1.04	0.98	0.61	0.79	0.97	0.75	3.01	2.71	2.78	4.17	3.71	4.45	4.98965e-58	3.44924e-57
Bv2_024440_eetw	blue	399.059	PREDICTED: probable sugar phosphate/phosphate translocator At3g11320 [Beta vulgaris subsp. vulgaris]	GO:0005783(endoplasmic reticulum);GO:0005794(Golgi apparatus);GO:0005886(plasma membrane);GO:0008514(organic anion transmembrane transporter activity);GO:0008643(carbohydrate transport);GO:0016021(integral component of membrane)	NA	NA	NA	63.27	72.97	68.48	93.48	92.46	91.68	52.78	53.96	51.09	57.3	56.32	53.96	31.44	31.88	34.4	8.94733e-80	8.89985e-79
Bv4_093550_ytci	blue	399.006	PREDICTED: mediator of RNA polymerase II transcription subunit 8 [Beta vulgaris subsp. vulgaris]	GO:0005634(nucleus);GO:0006351(transcription, DNA-templated);GO:0006355(regulation of transcription, DNA-templated);GO:0009909(regulation of flower development);GO:0016592(mediator complex);GO:0050832(defense response to fungus)	NA	NA	NA	119.68	130.06	132.25	121.17	121.51	125.58	94.78	98.44	97.04	199.76	194.98	208.02	296.35	274.33	288.18	7.37102e-113	1.14143e-111
Bv8_198800_zurt	blue	398.082	PREDICTED: pathogenesis-related protein PR-1 [Beta vulgaris subsp. vulgaris]	GO:0003674(molecular_function);GO:0005576(extracellular region);GO:0008150(biological_process)	NA	NA	NA	8.84	9.43	8.27	1.55	2.63	3.02	6.71	5.62	6.05	3.45	2.95	3.17	21.34	24.11	25.35	4.06936e-86	4.43245e-85
Bv5_098880_orhw	blue	398.024	PREDICTED: probable protein phosphatase 2C 51 [Beta vulgaris subsp. vulgaris]	GO:0004722(protein serine/threonine phosphatase activity);GO:0005515(protein binding);GO:0005634(nucleus);GO:0005794(Golgi apparatus);GO:0005829(cytosol);GO:0005886(plasma membrane);GO:0006470(protein dephosphorylation);GO:0009414(response to water deprivation);GO:0009658(chloroplast organization);GO:0009737(response to abscisic acid);GO:0009788(negative regulation of abscisic acid-activated sign…	04016(MAPK signaling pathway - plant);04075(Plant hormone signal transduction)	K14497	EC:3.1.3.16	0.54	0.85	0.4	4.55	3.88	5.18	2.71	2.33	1.59	10.62	12.02	10.86	16.83	17.47	17.96	2.14962e-106	3.0529e-105
Bv3_061590_skks	blue	397.716	PREDICTED: uncharacterized protein LOC104889360 [Beta vulgaris subsp. vulgaris]	GO:0003674(molecular_function);GO:0005634(nucleus);GO:0016021(integral component of membrane)	NA	NA	NA	4.55	5.78	4.77	4.94	6.17	4.64	6.71	6.86	6.38	11.07	12	11.98	13.61	13.7	13.48	8.7469e-46	4.76511e-45
Bv5_099920_hwtr	blue	397.707	PREDICTED: 1-aminocyclopropane-1-carboxylate synthase [Beta vulgaris subsp. vulgaris]	GO:0005515(protein binding);GO:0005737(cytoplasm);GO:0006952(defense response);GO:0006979(response to oxidative stress);GO:0009611(response to wounding);GO:0009612(response to mechanical stimulus);GO:0009693(ethylene biosynthetic process);GO:0009723(response to ethylene);GO:0009733(response to auxin);GO:0009753(response to jasmonic acid);GO:0009835(fruit ripening);GO:0010087(phloem or xylem histo…	00270(Cysteine and methionine metabolism);04016(MAPK signaling pathway - plant)	K20772	EC:4.4.1.14	423.43	465.78	480.53	631.72	632.85	626.99	366.33	359.52	355.52	379.62	372.75	361.14	220.12	210.37	221.29	8.1682e-15	1.79768e-14
Bv_000260_qxfh	blue	397.162	PREDICTED: protein GPR107 [Beta vulgaris subsp. vulgaris]	GO:0005768(endosome);GO:0005794(Golgi apparatus);GO:0005802(trans-Golgi network);GO:0009507(chloroplast);GO:0016021(integral component of membrane)	NA	NA	NA	4.14	5.53	5.42	4.4	3.73	3.18	12.09	12.19	11.2	11.5	10.28	12.28	12.81	15.12	15.79	8.87068e-57	5.98272e-56
Bv8_184590_iutu	blue	397.088	PREDICTED: uncharacterized protein LOC104900816 [Beta vulgaris subsp. vulgaris]	GO:0003677(DNA binding);GO:0003682(chromatin binding);GO:0005634(nucleus);GO:0008150(biological_process)	NA	NA	NA	25.67	25.15	27.26	10.42	10.38	11.06	26.94	27.93	24.17	26.46	24.58	26.11	40.16	39.88	42.66	5.13533e-62	3.79331e-61
Bv_012640_iicn	blue	396.416	PREDICTED: transcription factor TGA2 isoform X1 [Beta vulgaris subsp. vulgaris];hypothetical protein BVRB_012640 isoform B [Beta vulgaris subsp. vulgaris]	GO:0003677(DNA binding);GO:0003700(DNA binding transcription factor activity);GO:0005515(protein binding);GO:0005634(nucleus);GO:0006351(transcription, DNA-templated);GO:0006355(regulation of transcription, DNA-templated);GO:0009909(regulation of flower development);GO:0043565(sequence-specific DNA binding);GO:0043565(sequence-specific DNA binding)	04075(Plant hormone signal transduction);04075(Plant hormone signal transduction)	K14431	NA	0.75	0.7	0.38	1.07	1.13	0.74	0.52	0.47	1.11	0.83	0.91	0.69	3.15	2.4	2.82	5.67893e-11	1.04177e-10
Bv5_119040_rogd	blue	395.918	PREDICTED: UDP-glycosyltransferase 74G1-like isoform X1 [Beta vulgaris subsp. vulgaris]	GO:0009813(flavonoid biosynthetic process);GO:0043231(intracellular membrane-bounded organelle);GO:0052696(flavonoid glucuronidation);GO:0080043(quercetin 3-O-glucosyltransferase activity);GO:0080044(quercetin 7-O-glucosyltransferase activity)	NA	NA	NA	63.46	68.88	68.24	88.98	91.03	90.25	20.03	24.5	23.48	41.6	38.24	38.37	5.5	5.51	6.27	0	0
Bv7_174570_xuji	blue	395.756	PREDICTED: WD repeat-containing protein DDB_G0292056 [Beta vulgaris subsp. vulgaris]	GO:0003674(molecular_function);GO:0005739(mitochondrion);GO:0008150(biological_process)	NA	NA	NA	2.27	2.76	1.48	1.29	1.56	2	1.39	1.69	0.74	1.17	1.15	1.47	8.16	6.31	7.42	5.71746e-27	1.96486e-26
Bv3_065370_cjkz	blue	395.276	hypothetical protein BVRB_3g065370 [Beta vulgaris subsp. vulgaris]	NA	NA	NA	NA	28.47	35.87	34.34	51.35	56.93	57.06	81.02	83.71	83.13	75.98	81.66	77.31	94.55	94.43	113.45	5.09984e-64	3.92164e-63
Bv1_003050_txdq	blue	395.081	PREDICTED: uncharacterized protein LOC104883650 [Beta vulgaris subsp. vulgaris]	GO:0004601(peroxidase activity);GO:0005886(plasma membrane);GO:0008150(biological_process);GO:0016021(integral component of membrane)	NA	NA	NA	2.53	2.94	2.44	2.64	2.46	2.57	4.4	4.43	3.48	4.28	3.9	3.92	5.26	6.06	4.56	7.40048e-12	1.41724e-11
Bv1_019400_pdsk	blue	394.624	PREDICTED: myosin-10 isoform X2 [Beta vulgaris subsp. vulgaris];PREDICTED: myosin-10 isoform X1 [Beta vulgaris subsp. vulgaris]	NA	00330(Arginine and proline metabolism);00330(Arginine and proline metabolism)	K01583	EC:4.1.1.19	5.08	5.66	7.07	2.52	3.33	2.95	4.68	5.89	5.27	7.36	6.73	7.01	10.72	9.62	9.67	1.11396e-30	4.24945e-30
Bv1_011300_oxqt	blue	394.617	PREDICTED: extensin-1 [Beta vulgaris subsp. vulgaris]	NA	NA	NA	NA	87.32	101.4	99.73	112.71	121.84	117.59	56.66	59.46	58.03	240.22	243.16	231.33	386.66	352.9	418.69	9.61928e-61	6.96817e-60
Bv5_112230_minw	blue	394.612	hypothetical protein BVRB_5g112230 [Beta vulgaris subsp. vulgaris]	GO:0005634(nucleus);GO:0008150(biological_process)	NA	NA	NA	0.21	0.84	1.29	0.56	0.75	0.66	0	0	0	1.42	1.6	1.35	3.5	3.55	4.38	5.88304e-22	1.73341e-21
Bv6_138260_iwqp	blue	394.044	hypothetical protein BVRB_6g138260 [Beta vulgaris subsp. vulgaris]	NA	NA	NA	NA	10.06	10.58	9.43	4.43	4.52	4.09	9.58	8.45	8.05	8.71	10.25	8.14	16.73	17.26	14.89	1.67327e-41	8.40326e-41
Bv5_115750_kuem	blue	393.776	hypothetical protein BVRB_5g115750 [Beta vulgaris subsp. vulgaris]	GO:0005576(extracellular region);GO:0006952(defense response);GO:0030414(peptidase inhibitor activity);GO:0031640(killing of cells of other organism);GO:0050832(defense response to fungus)	NA	NA	NA	6.25	5.36	6.59	11.93	12.98	12.06	32.55	28.32	31.42	70.69	70.39	74.68	82.57	84.71	82.97	0	0
Bv1_000090_pnxw	blue	393.718	PREDICTED: ethylene-responsive transcription factor ERF014 [Beta vulgaris subsp. vulgaris]	GO:0003677(DNA binding);GO:0003700(DNA binding transcription factor activity);GO:0005634(nucleus);GO:0006351(transcription, DNA-templated);GO:0006355(regulation of transcription, DNA-templated);GO:0009873(ethylene-activated signaling pathway)	NA	NA	NA	12.39	15.82	13.93	9.46	8.97	8.29	6.43	6.12	5.04	5.54	6.6	5.39	1.12	0.97	0.87	2.272e-109	3.34827e-108
Bv5_126900_ikmh	blue	393.697	PREDICTED: uncharacterized protein LOC104908342 [Beta vulgaris subsp. vulgaris]	GO:0003674(molecular_function);GO:0008150(biological_process);GO:0016021(integral component of membrane)	NA	NA	NA	0	0	0	0.07	0.06	0.36	0	0.2	0	1.95	1.09	1.07	2.1	2.36	2.65	1.39356e-17	3.47166e-17
Bv7_172720_kyyx	blue	393.524	PREDICTED: UPF0503 protein At3g09070, chloroplastic [Beta vulgaris subsp. vulgaris]	GO:0003674(molecular_function);GO:0005886(plasma membrane);GO:0009507(chloroplast);GO:0010088(phloem development);GO:0016324(apical plasma membrane);GO:0016328(lateral plasma membrane)	NA	NA	NA	17.5	21.5	16.08	25.24	26.92	25.06	24.59	21.68	22.33	21.09	19.99	21.48	42.84	46.43	51.25	1.00362e-30	3.83584e-30
Bv2_024630_cjeg	blue	393.399	PREDICTED: 18.2 kDa class I heat shock protein [Beta vulgaris subsp. vulgaris]	GO:0005515(protein binding);GO:0005737(cytoplasm);GO:0009408(response to heat);GO:0009644(response to high light intensity);GO:0010286(heat acclimation);GO:0042542(response to hydrogen peroxide)	04141(Protein processing in endoplasmic reticulum)	K13993	NA	3.23	2.25	1.52	2.65	3.04	1.71	6.06	5.89	4.65	6.46	5.66	6.59	6.94	7.56	8.56	2.31699e-14	4.99783e-14
Bv1_005100_iasc	blue	393.296	PREDICTED: cytochrome P450 71A1-like [Beta vulgaris subsp. vulgaris]	GO:0016020(membrane);GO:0016709(oxidoreductase activity, acting on paired donors, with incorporation or reduction of molecular oxygen, NAD(P)H as one donor, and incorporation of one atom of oxygen);GO:0044550(secondary metabolite biosynthetic process)	NA	NA	NA	2.59	4.09	3.35	4.04	4.91	4.93	3.28	3.59	2.83	5.59	5.99	5.31	9.83	8.14	9.35	2.46306e-21	7.07879e-21
Bv1_003580_zgio	blue	392.413	hypothetical protein B456_007G025200, partial [Gossypium raimondii]	GO:0004842(ubiquitin-protein transferase activity);GO:0005524(ATP binding);GO:0005737(cytoplasm);GO:0006511(ubiquitin-dependent protein catabolic process);GO:0016567(protein ubiquitination);GO:0031625(ubiquitin protein ligase binding)	04141(Protein processing in endoplasmic reticulum);04120(Ubiquitin mediated proteolysis)	K06689	EC:2.3.2.23	204.12	223.76	247.65	293.5	285.59	298.48	140.78	149.36	151.43	154.01	147.25	154.24	95.41	83.21	87.22	3.88492e-43	2.01922e-42
Bv3_051040_xmfe	blue	392.236	hypothetical protein BVRB_3g051040 [Beta vulgaris subsp. vulgaris]	GO:0006952(defense response);GO:0009506(plasmodesma);GO:0046658(anchored component of plasma membrane)	NA	NA	NA	2.61	2.07	2.88	1.27	1.2	1.25	4.16	2.94	2.56	4.77	2.99	2.77	7.33	6.89	12.07	6.83354e-22	2.00887e-21
Bv3_059660_woks	blue	392.158	PREDICTED: polygalacturonase At1g48100 [Beta vulgaris subsp. vulgaris]	GO:0004650(polygalacturonase activity);GO:0005576(extracellular region);GO:0005618(cell wall);GO:0005975(carbohydrate metabolic process);GO:0009831(plant-type cell wall modification involved in multidimensional cell growth);GO:0071555(cell wall organization)	00040(Pentose and glucuronate interconversions)	K01213	EC:3.2.1.67	0.62	0.61	1.32	0.83	0.8	0.81	0.79	0.84	1.19	1.27	1.19	1.39	2.32	2.41	1.88	7.11927e-06	9.7618e-06
Bv4_071960_mhku	blue	392.118	hypothetical protein BVRB_4g071960 [Beta vulgaris subsp. vulgaris]	GO:0004674(protein serine/threonine kinase activity);GO:0005886(plasma membrane);GO:0006468(protein phosphorylation)	NA	NA	NA	22.25	24.96	25.75	8	9.13	7.92	25.02	23.79	25.9	19.8	19.72	18.64	41.91	39.69	41.55	5.51117e-154	1.2879e-152
Bv6_136500_ftza	blue	390.988	PREDICTED: alkane hydroxylase MAH1-like isoform X1 [Beta vulgaris subsp. vulgaris]	GO:0004497(monooxygenase activity);GO:0005506(iron ion binding);GO:0005576(extracellular region);GO:0016021(integral component of membrane);GO:0016705(oxidoreductase activity, acting on paired donors, with incorporation or reduction of molecular oxygen);GO:0019825(oxygen binding);GO:0020037(heme binding);GO:0055114(oxidation-reduction process)	00073(Cutin, suberine and wax biosynthesis)	K15405	NA	0	0.03	0	0.15	0.22	0	2.22	2.04	1.32	0.77	1.29	1.5	2.82	3.43	2.21	1.2686e-31	4.98411e-31
Bv7_167970_qmek	blue	390.604	PREDICTED: RPM1-interacting protein 4 [Beta vulgaris subsp. vulgaris]	NA	04626(Plant-pathogen interaction)	K13456	NA	152.02	177.05	184.92	252.07	271.15	271.89	115.48	111.67	113.83	114.97	113.66	121.87	38.87	36.88	38.49	1.24756e-161	3.11355e-160
[truncated: 6,416 more rows]
