# Supplementary material for: Transcriptome and Metabolome Analyses Revealed the Response Mechanism of Sugar Beet to Salt Stress of Different Durations
Source: Int J Mol Sci. 2022 Aug 24;23(17):9599. doi: 10.3390/ijms23179599 (PMC9455719; doi:10.3390/ijms23179599)
Supplement: Supplementary file 1 [file ijms-23-09599-s001.zip › Table S3 Details information of differentially expressed genes (DEGs) in roots under salt-stress.xlsx]

## Sheet: Sheet1
Table S5 Details information of differentially expressed genes (DEGs) in roots under salt-stress
gene_id	Co-expression module	connectivity in module	Description	GO	KEGG	KO_ENTRY	EC	root_ck_1	root_ck_2	root_ck_3	root_12_1	root_12_2	root_12_3	root_24_1	root_24_2	root_24_3	root_48_1	root_48_2	root_48_3	root_72_1	root_72_2	root_72_3	pval	qval
Bv6_127910_ozcn	black	79.7187	PREDICTED: uncharacterized protein LOC104894929 [Beta vulgaris subsp. vulgaris]	GO:0005575(cellular_component);GO:0008150(biological_process);GO:0016740(transferase activity)	NA	NA	NA	69.5761	69.7269	69.8974	20.2541	14.3899	16.8849	51.6775	49.1532	51.2356	48.55	43.4146	52.0166	103.982	94.0838	107.77	1.94853e-159	1.91513e-158
Bv_015490_fxjt	black	79.5515	hypothetical protein BVRB_015490 [Beta vulgaris subsp. vulgaris]	NA	NA	NA	NA	0.693119	0.701981	0.742247	0.0001	0.0001	0.0001	0.353054	0.354238	0.26335	0.443538	0.489362	0.55878	1.38692	1.32691	1.4525	7.01979e-73	3.30674e-72
Bv_009200_sruu	black	79.1476	PREDICTED: quinolinate synthase, chloroplastic [Beta vulgaris subsp. vulgaris]	GO:0008047(enzyme activator activity);GO:0008987(quinolinate synthetase A activity);GO:0009060(aerobic respiration);GO:0009435(NAD biosynthetic process);GO:0009507(chloroplast);GO:0016226(iron-sulfur cluster assembly);GO:0016740(transferase activity);GO:0034628('de novo' NAD biosynthetic process from aspartate);GO:0042803(protein homodimerization activity);GO:0046872(metal ion binding);GO:0051176…	00760(Nicotinate and nicotinamide metabolism)	K03517	EC:2.5.1.72	73.8654	73.0067	83.0936	177.383	159.595	176.586	122.563	125.009	129.602	102.594	111.683	107.314	38.7478	38.3869	36.8977	6.15304e-225	8.90759e-224
Bv7_168290_dfwo	black	78.347	PREDICTED: uncharacterized protein LOC104899597 [Beta vulgaris subsp. vulgaris]	GO:0005524(ATP binding);GO:0005739(mitochondrion);GO:0008150(biological_process)	NA	NA	NA	105.951	107.178	117.165	20.4206	21.806	23.8968	49.6122	49.3715	55.4572	46.4144	41.4059	44.245	179.096	159.509	164.834	0	0
Bv9_220160_sgim	black	78.1867	PREDICTED: boron transporter 4 [Beta vulgaris subsp. vulgaris]	GO:0005887(integral component of plasma membrane);GO:0008509(anion transmembrane transporter activity);GO:0051453(regulation of intracellular pH);GO:0098656(anion transmembrane transport)	NA	NA	NA	20.5738	22.7872	23.128	5.84798	4.37979	5.17379	11.5388	10.5314	10.9798	14.6038	15.47	14.5246	35.8344	41.897	36.6268	5.53183e-120	4.06617e-119
Bv_001450_xrfo	black	78.0518	PREDICTED: sugar transporter ERD6-like 16 [Beta vulgaris subsp. vulgaris]	GO:0005351(carbohydrate:proton symporter activity);GO:0005355(glucose transmembrane transporter activity);GO:0005887(integral component of plasma membrane);GO:0046323(glucose import)	NA	NA	NA	8.87303	8.78709	7.16996	1.31363	1.22642	1.07202	2.38488	3.005	1.74244	3.5003	3.91611	3.93067	12.0703	10.5263	11.1431	1.8871e-88	1.04478e-87
Bv8_180980_ezxd	black	77.942	PREDICTED: CBL-interacting serine/threonine-protein kinase 12 [Beta vulgaris subsp. vulgaris]	GO:0004674(protein serine/threonine kinase activity);GO:0005515(protein binding);GO:0005524(ATP binding);GO:0005622(intracellular);GO:0005886(plasma membrane);GO:0016301(kinase activity);GO:0018105(peptidyl-serine phosphorylation);GO:0018107(peptidyl-threonine phosphorylation);GO:0035556(intracellular signal transduction)	NA	NA	NA	48.6934	45.3637	46.1112	104.589	102.595	107.422	73.9787	75.2241	72.7781	87.2923	78.9911	80.8632	35.8323	31.9286	35.1949	3.94643e-157	3.82725e-156
Bv1_015780_zezc	black	77.8363	PREDICTED: serine/threonine-protein phosphatase 6 regulatory ankyrin repeat subunit A isoform X1 [Beta vulgaris subsp. vulgaris];hypothetical protein BVRB_1g015780 isoform B [Beta vulgaris subsp. vulgaris]	GO:0007165(signal transduction);GO:0016020(membrane);GO:0016020(membrane)	NA	NA	NA	11.5406	11.5208	12.5261	5.15937	3.80304	4.9963	5.94255	5.17912	6.21866	6.79718	7.12496	7.56198	16.0365	17.8608	17.3272	1.72731e-73	8.19977e-73
Bv6_133300_yecs	black	76.6196	PREDICTED: WAT1-related protein At5g64700 [Beta vulgaris subsp. vulgaris]	GO:0005886(plasma membrane);GO:0006810(transport);GO:0022857(transmembrane transporter activity)	NA	NA	NA	4.70848	4.4331	4.77761	1.72844	1.06859	1.48517	2.82953	2.6466	2.10437	3.03335	2.5999	2.92221	7.95747	8.15626	7.86344	1.48387e-63	6.25691e-63
Bv5_116190_nqne	black	76.1437	PREDICTED: uncharacterized protein LOC109133524 [Beta vulgaris subsp. vulgaris]	NA	NA	NA	NA	5.88868	5.78082	4.98216	2.02828	1.5819	1.64446	2.98066	3.33903	2.80876	3.64371	3.79335	2.7365	8.83656	9.47324	8.29671	5.77177e-72	2.69742e-71
Bv4_083890_jjmx	black	75.6204	PREDICTED: probable WRKY transcription factor 74 [Beta vulgaris subsp. vulgaris]	GO:0003700(DNA binding transcription factor activity);GO:0005516(calmodulin binding);GO:0005634(nucleus);GO:0006351(transcription, DNA-templated);GO:0006355(regulation of transcription, DNA-templated);GO:0043565(sequence-specific DNA binding)	04016(MAPK signaling pathway - plant);04626(Plant-pathogen interaction)	K13425	NA	5.45668	5.3879	5.23976	2.61527	2.89469	2.10246	3.66443	4.01732	3.5676	5.04274	4.87926	4.52848	8.2418	8.35371	8.54769	5.9413e-47	1.93746e-46
Bv6_130320_xghy	black	74.9004	PREDICTED: mannose/glucose-specific lectin [Beta vulgaris subsp. vulgaris]	GO:0000771(agglutination involved in conjugation);GO:0005536(glucose binding);GO:0005537(mannose binding);GO:0005575(cellular_component)	NA	NA	NA	12.2906	11.7842	12.5931	2.32087	2.72287	2.61143	5.6893	4.63721	4.7058	10.0804	9.8275	10.5121	17.5975	17.8987	16.7137	5.03909e-135	4.15813e-134
Bv2_034040_kizy	black	73.9453	PREDICTED: thermospermine synthase ACAULIS5 isoform X2 [Beta vulgaris subsp. vulgaris];PREDICTED: thermospermine synthase ACAULIS5 isoform X1 [Beta vulgaris subsp. vulgaris]	GO:0005737(cytoplasm);GO:0006596(polyamine biosynthetic process);GO:0010487(thermospermine synthase activity);GO:0010487(thermospermine synthase activity)	NA	NA	NA	16.4224	17.0755	16.2986	5.54169	5.33416	4.99513	7.95525	7.1036	7.25436	15.2249	15.6046	14.8464	26.6291	25.9893	27.0475	1e-307	2e-306
Bv1_011210_zihs	black	73.8826	PREDICTED: NAC domain-containing protein 76 [Beta vulgaris subsp. vulgaris]	GO:0005634(nucleus);GO:0006355(regulation of transcription, DNA-templated);GO:0009834(plant-type secondary cell wall biogenesis);GO:0048829(root cap development)	03013(RNA transport);03015(mRNA surveillance pathway);03018(RNA degradation)	K13126	NA	7.09792	7.51682	7.91386	3.34481	3.59391	2.50987	4.39468	3.65705	4.07758	5.31994	5.41485	6.9118	9.72594	9.55612	10.3886	7.43943e-31	1.81482e-30
Bv6_149060_fmfu	black	73.8216	PREDICTED: aldehyde dehydrogenase family 2 member B7, mitochondrial isoform X1 [Beta vulgaris subsp. vulgaris]	GO:0004029(aldehyde dehydrogenase (NAD) activity)	00010(Glycolysis / Gluconeogenesis);00053(Ascorbate and aldarate metabolism);00620(Pyruvate metabolism);00071(Fatty acid degradation);00561(Glycerolipid metabolism);00280(Valine, leucine and isoleucine degradation);00310(Lysine degradation);00330(Arginine and proline metabolism);00340(Histidine metabolism);00380(Tryptophan metabolism);00410(beta-Alanine metabolism);00903(Limonene and pinene degra…	K00128	EC:1.2.1.3	108.099	107.571	101.397	50.3461	50.9147	51.3422	65.7139	64.3228	60.5903	92.3494	96.4574	96.6539	135.948	136.95	135.942	7.1186e-157	6.88603e-156
Bv6_139510_zpaz	black	72.8699	hypothetical protein BVRB_6g139510 [Beta vulgaris subsp. vulgaris]	NA	NA	NA	NA	1.91668	2.41457	2.17795	0.0001	0.187303	0.296616	0.850843	0.663842	0.485419	1.69563	1.05139	1.63594	4.45747	4.11259	3.53198	1.06526e-25	2.31613e-25
Bv7_173660_rmpw	black	72.2646	PREDICTED: scarecrow-like protein 30 [Beta vulgaris subsp. vulgaris]	GO:0003700(DNA binding transcription factor activity);GO:0005634(nucleus);GO:0006355(regulation of transcription, DNA-templated);GO:0043565(sequence-specific DNA binding)	04075(Plant hormone signal transduction)	K14494	NA	624.485	608.927	599.934	230.047	232.224	227.657	478.354	495.508	496.537	395.833	397.136	414.886	1049.8	1027.81	1027.2	0	0
Bv7_167590_rcis	black	72.1741	PREDICTED: uncharacterized protein LOC104899508 [Beta vulgaris subsp. vulgaris]	GO:0003674(molecular_function);GO:0008150(biological_process);GO:0009507(chloroplast)	NA	NA	NA	30.3807	26.6997	28.2925	9.85404	8.63589	11.2658	20.8349	16.5515	18.4156	16.2555	16.2886	14.2017	47.6162	42.9878	38.946	6.9019e-72	3.22321e-71
Bv6_143080_ezxj	black	71.9148	PREDICTED: sec-independent protein translocase protein TATC, chloroplastic [Beta vulgaris subsp. vulgaris]	GO:0009535(chloroplast thylakoid membrane);GO:0033281(TAT protein transport complex);GO:0043953(protein transport by the Tat complex);GO:0045038(protein import into chloroplast thylakoid membrane)	03060(Protein export)	K03118	NA	23.988	20.8282	21.6422	68.4404	62.4369	63.5226	38.8823	40.3974	34.1347	39.8024	41.0893	38.0886	14.6021	13.4936	13.016	6.74632e-150	6.16755e-149
Bv1_006640_wuoe	black	70.7348	hypothetical protein BVRB_1g006640 [Beta vulgaris subsp. vulgaris]	GO:0000771(agglutination involved in conjugation);GO:0005536(glucose binding);GO:0005537(mannose binding);GO:0005575(cellular_component)	NA	NA	NA	85.3496	85.4991	80.098	26.9186	30.6665	25.7488	75.8288	72.6593	78.2929	61.4977	62.7987	67.4538	111.076	110.738	109.506	6.64483e-177	7.29394e-176
Bv8_200190_mqhy	black	70.607	PREDICTED: protein PHLOEM PROTEIN 2-LIKE A1 [Beta vulgaris subsp. vulgaris]	GO:0005634(nucleus);GO:0009625(response to insect);GO:0030246(carbohydrate binding);GO:0043394(proteoglycan binding)	NA	NA	NA	24.7709	21.5762	23.7536	9.38529	6.75129	8.73994	13.7442	15.6309	12.9958	22.839	22.4289	21.2301	44.045	40.0161	38.3124	1.14948e-88	6.37706e-88
Bv9_215390_firz	black	70.4171	PREDICTED: protein EXORDIUM-like 2 [Beta vulgaris subsp. vulgaris]	GO:0003674(molecular_function);GO:0005615(extracellular space);GO:0005618(cell wall);GO:0005794(Golgi apparatus);GO:0005829(cytosol);GO:0008150(biological_process);GO:0009505(plant-type cell wall);GO:0009506(plasmodesma);GO:0009507(chloroplast);GO:0048046(apoplast)	NA	NA	NA	241.376	226.828	241.714	66.2693	74.2522	69.3541	158.382	160.619	202.823	129.591	118.594	123.507	268.956	265.065	274.775	1.7186e-138	1.4516e-137
Bv6_150000_gwao	black	69.9815	PREDICTED: uncharacterized protein At2g33490 [Beta vulgaris subsp. vulgaris]	GO:0003674(molecular_function);GO:0005634(nucleus);GO:0005886(plasma membrane);GO:0008150(biological_process)	NA	NA	NA	93.988	93.115	89.7933	197.954	191.405	198.638	164.836	155.616	153.201	110	116.162	118.561	60.8276	58.8603	59.2556	6.7507e-223	9.64045e-222
Bv3_062580_ckmc	black	69.7486	PREDICTED: protein STRICTOSIDINE SYNTHASE-LIKE 10 [Beta vulgaris subsp. vulgaris]	GO:0005783(endoplasmic reticulum);GO:0016020(membrane);GO:0016788(hydrolase activity, acting on ester bonds)	NA	NA	NA	2.23626	2.11128	2.8247	1.07541	1.13176	0.921077	1.52058	1.52055	1.89463	1.41869	1.63557	1.52412	3.16611	3.22604	2.85537	1.54016e-21	3.01751e-21
Bv5_119660_pzow	black	69.1893	PREDICTED: type I inositol polyphosphate 5-phosphatase 4 [Beta vulgaris subsp. vulgaris]	GO:0005737(cytoplasm);GO:0016787(hydrolase activity);GO:0046856(phosphatidylinositol dephosphorylation)	00562(Inositol phosphate metabolism);04070(Phosphatidylinositol signaling system)	K20279	EC:3.1.3.36	15.2336	19.4016	17.8533	4.53737	5.0153	6.76247	7.3098	7.04811	6.66793	7.0451	13.2515	12.2702	23.2637	25.8719	22.6061	3.2804e-28	7.56576e-28
Bv3_049330_hurx	black	68.4418	PREDICTED: transcription factor bHLH104 [Beta vulgaris subsp. vulgaris]	GO:0003677(DNA binding);GO:0003700(DNA binding transcription factor activity);GO:0005515(protein binding);GO:0005634(nucleus);GO:0006351(transcription, DNA-templated);GO:0006355(regulation of transcription, DNA-templated);GO:0046983(protein dimerization activity)	NA	NA	NA	106.298	102.915	101.065	45.5904	42.1205	43.2904	92.9111	88.2462	85.7009	81.1394	76.4496	80.9241	117.662	119.273	113.971	1.2619e-124	9.60289e-124
Bv1_016400_jjoj	black	67.6137	PREDICTED: chaperone protein dnaJ 11, chloroplastic [Beta vulgaris subsp. vulgaris]	GO:0005634(nucleus);GO:0006457(protein folding);GO:0009507(chloroplast);GO:0009536(plastid);GO:0009570(chloroplast stroma)	NA	NA	NA	34.3903	33.298	37.0866	5.62406	5.1757	6.05565	10.9409	9.91244	11.7468	9.95418	9.1163	9.50537	36.2952	34.7528	36.1808	0	0
Bv4_082650_zeok	black	67.5565	PREDICTED: uncharacterized protein LOC104890993 isoform X1 [Beta vulgaris subsp. vulgaris]	NA	NA	NA	NA	3.17377	3.22252	2.92686	0.934435	1.01822	0.718483	1.87565	2.29618	1.7795	2.53784	3.33303	1.94836	5.41202	4.64847	5.8538	1.08125e-29	2.57318e-29
Bv2_023460_yfhy	black	67.2734	PREDICTED: omega-hydroxypalmitate O-feruloyl transferase [Beta vulgaris subsp. vulgaris]	GO:0005737(cytoplasm);GO:0016740(transferase activity);GO:0016747(transferase activity, transferring acyl groups other than amino-acyl groups)	00073(Cutin, suberine and wax biosynthesis)	K15400	EC:2.3.1.188	3.07689	2.91872	2.69172	0.548891	0.890672	0.815763	1.52204	1.59274	1.52886	2.80885	2.41387	2.42346	5.15803	3.88047	5.51275	3.85668e-40	1.12246e-39
Bv3_067300_yicc	black	66.9891	hypothetical protein BVRB_3g067300 [Beta vulgaris subsp. vulgaris]	GO:0005634(nucleus);GO:0009056(catabolic process);GO:0016787(hydrolase activity);GO:0052689(carboxylic ester hydrolase activity)	NA	NA	NA	2.86248	3.05379	3.52095	0.176661	0.13513	0.0557889	0.704725	0.277267	0.580373	2.85697	2.65601	2.29785	5.0232	4.63741	4.44632	4.89074e-72	2.2885e-71
Bv3_067080_znum	black	66.652	hypothetical protein BVRB_3g067080 [Beta vulgaris subsp. vulgaris]	NA	NA	NA	NA	160.434	142.732	159.243	39.4712	42.7661	39.7597	45.6061	49.3596	55.5088	153.972	151.283	156.952	272.857	254.729	290.142	0	0
Bv3_056430_dnxq	black	66.4635	hypothetical protein BVRB_3g056430 [Beta vulgaris subsp. vulgaris]	NA	NA	NA	NA	5.8955	5.38705	4.61944	1.79888	1.43895	1.61559	4.35914	3.66516	3.77743	3.43254	2.76866	3.12434	5.93754	6.28737	5.67307	4.13617e-38	1.15834e-37
Bv9_217390_nzak	black	66.1227	hypothetical protein BVRB_9g217390 [Beta vulgaris subsp. vulgaris]	GO:0000038(very long-chain fatty acid metabolic process);GO:0005634(nucleus);GO:0006633(fatty acid biosynthetic process);GO:0016021(integral component of membrane);GO:0042335(cuticle development);GO:0102336(3-oxo-arachidoyl-CoA synthase activity);GO:0102337(3-oxo-cerotoyl-CoA synthase activity);GO:0102338(3-oxo-lignoceronyl-CoA synthase activity);GO:0102756(very-long-chain 3-ketoacyl-CoA synthase…	00062(Fatty acid elongation)	K15397	EC:2.3.1.199	19.5466	23.0778	27.5714	5.04043	2.79625	2.3721	5.97091	6.92003	6.38539	21.5052	20.091	16.9334	34.5098	34.0168	32.4215	6.86024e-64	2.90496e-63
Bv5_111680_xork	black	65.2119	hypothetical protein BVRB_5g111680 isoform A [Beta vulgaris subsp. vulgaris]	NA	NA	NA	NA	1.67723	1.17021	0.865253	0.0001	0.330637	0.176617	0.126766	0.30931	0.319832	0.52435	0.573332	0.476386	1.82517	2.28107	2.04771	2.11647e-10	2.9834e-10
Bv5_100880_qdgj	black	65.0426	PREDICTED: heat stress transcription factor B-2b [Beta vulgaris subsp. vulgaris]	GO:0005634(nucleus)	NA	NA	NA	49.8767	51.6614	55.6255	16.1165	16.4698	16.7827	16.0282	14.1646	15.7373	19.144	15.7862	18.6514	63.5819	56.6744	57.883	2.65354e-273	4.84245e-272
Bv6_152030_xidh	black	64.742	PREDICTED: hsp70-Hsp90 organizing protein 3 [Beta vulgaris subsp. vulgaris]	GO:0005634(nucleus);GO:0005737(cytoplasm);GO:0005829(cytosol);GO:0006457(protein folding);GO:0006457(protein folding)	NA	NA	NA	4.79406	4.42084	5.2894	1.90146	2.15974	1.68946	3.11983	3.3308	2.7249	1.97525	1.77897	2.21683	5.58451	6.20489	5.76171	8.75704e-24	1.81878e-23
Bv2_033700_csii	black	64.7036	PREDICTED: uncharacterized protein LOC104886547 isoform X1 [Beta vulgaris subsp. vulgaris]	GO:0003674(molecular_function);GO:0005634(nucleus);GO:0005773(vacuole);GO:0008150(biological_process)	NA	NA	NA	202.403	200.945	200.396	73.9399	72.1512	72.571	110.926	105.296	109.423	69.8508	63.42	65.8448	325.202	333.808	329.321	0	0
Bv5_127000_cxrg	black	64.3131	hypothetical protein BVRB_5g127000 [Beta vulgaris subsp. vulgaris]	GO:0005388(calcium-transporting ATPase activity);GO:0005887(integral component of plasma membrane);GO:0043231(intracellular membrane-bounded organelle)	NA	NA	NA	285.038	273.872	301.463	599.748	632.953	608.814	610.434	608.926	593.099	569.041	626.246	628.539	246.951	245.592	246.161	1.90256e-177	2.09691e-176
Bv3_056860_tgfu	black	63.1869	PREDICTED: nuclear poly(A) polymerase 3 isoform X4 [Beta vulgaris subsp. vulgaris];hypothetical protein BVRB_3g056860 isoform B [Beta vulgaris subsp. vulgaris]	GO:0004652(polynucleotide adenylyltransferase activity);GO:0005634(nucleus);GO:0006378(mRNA polyadenylation);GO:0006378(mRNA polyadenylation)	03015(mRNA surveillance pathway);03015(mRNA surveillance pathway)	K14376	EC:2.7.7.19	1.39614	1.22028	1.48791	0.694922	0.823233	0.572326	0.48614	0.617357	0.56992	1.09432	1.23151	1.18303	2.41027	2.63046	2.42299	3.63277e-40	1.05778e-39
Bv4_072290_pyiq	black	62.8904	hypothetical protein BVRB_4g072290 [Beta vulgaris subsp. vulgaris]	GO:0000723(telomere maintenance);GO:0003677(DNA binding);GO:0003700(DNA binding transcription factor activity);GO:0005515(protein binding);GO:0005634(nucleus);GO:0006351(transcription, DNA-templated);GO:0006355(regulation of transcription, DNA-templated);GO:0007389(pattern specification process);GO:0009734(auxin-activated signaling pathway);GO:0009873(ethylene-activated signaling pathway);GO:0010…	NA	NA	NA	55.271	56.7776	53.2304	25.1537	23.2728	25.4286	17.2451	18.0183	18.789	28.9972	30.9444	32.3773	62.0083	62.491	62.216	4.71219e-161	4.675e-160
Bv6_132350_tysk	black	62.7589	PREDICTED: 36.4 kDa proline-rich protein [Beta vulgaris subsp. vulgaris]	GO:0005575(cellular_component)	NA	NA	NA	157.043	147.534	188.735	11.6673	12.2488	13.328	51.8858	60.9604	77.6104	166.865	171.575	194.245	286.7	280.022	294.749	0	0
Bv6_145770_uodc	black	62.3669	hypothetical protein BVRB_6g145770 [Beta vulgaris subsp. vulgaris]	NA	NA	NA	NA	263.519	278.098	315.162	109.83	116.965	101.157	233.917	255.899	245.84	183.396	157.983	161.758	315.468	326.828	329.267	1.58209e-113	1.10758e-112
Bv8_194050_xddr	black	62.2613	PREDICTED: protein LURP-one-related 12 [Beta vulgaris subsp. vulgaris]	GO:0006952(defense response)	03013(RNA transport)	K03239	NA	11.6302	9.04921	10.6248	5.53317	4.91733	3.67952	6.72052	7.58241	8.02006	7.71027	6.63181	7.91234	19.291	21.3488	21.0084	8.34733e-49	2.81093e-48
Bv5_111300_jjhq	black	61.7555	hypothetical protein BVRB_5g111300 [Beta vulgaris subsp. vulgaris]	NA	NA	NA	NA	2.24622	2.0444	2.12895	0.486534	0.331432	0.672765	0.201642	0.304642	0.207512	1.1642	0.726888	0.967122	2.26212	2.73711	2.52247	1.04389e-46	3.39655e-46
Bv6_156100_uxwa	black	61.2649	PREDICTED: flagellar radial spoke protein 5 isoform X2 [Beta vulgaris subsp. vulgaris]	GO:0004033(aldo-keto reductase (NADP) activity);GO:0009505(plant-type cell wall);GO:0009507(chloroplast);GO:0009570(chloroplast stroma);GO:0009941(chloroplast envelope)	NA	NA	NA	5.2692	5.81286	6.51537	0.694511	0.433612	0.275187	0.0001	0.0001	0.0001	0.0001	0.0001	0.0001	6.9961	7.99424	7.07058	5.48806e-190	6.50987e-189
Bv9_225220_irtc	black	61.0431	PREDICTED: protein trichome birefringence-like 36 [Beta vulgaris subsp. vulgaris]	GO:0005794(Golgi apparatus);GO:0016413(O-acetyltransferase activity);GO:0071554(cell wall organization or biogenesis)	NA	NA	NA	64.9278	69.5439	80.8359	31.1012	34.2595	39.8142	27.9812	24.6511	27.9478	62.0241	56.042	61.2949	92.0547	94.7378	100.426	6.21278e-98	3.78409e-97
Bv3_061990_gkkz	black	60.8897	PREDICTED: EGF domain-specific O-linked N-acetylglucosamine transferase-like isoform X1 [Beta vulgaris subsp. vulgaris]	GO:0005576(extracellular region);GO:0016021(integral component of membrane);GO:0016757(transferase activity, transferring glycosyl groups)	00514(Other types of O-glycan biosynthesis)	K18134	EC:2.4.1.255	3.96479	4.8792	4.58051	2.90456	2.05399	1.69964	4.03796	3.95063	4.43345	3.69695	3.12997	3.67546	7.16368	6.72723	6.80642	3.32875e-08	4.35879e-08
Bv3_053880_mpkc	black	60.8168	PREDICTED: bZIP transcription factor 53 [Beta vulgaris subsp. vulgaris]	NA	NA	NA	NA	41.0321	41.5196	46.7109	14.76	14.1874	13.0648	21.0185	22.7743	23.9269	16.4285	14.5256	14.6978	44.829	40.5813	42.43	1.27403e-173	1.36072e-172
Bv2_032460_itto	black	60.4602	hypothetical protein BVRB_016620, partial [Beta vulgaris subsp. vulgaris]	NA	NA	NA	NA	2.57184	2.43431	3.32109	0.309172	0.728501	0.267023	1.53648	2.95582	1.97556	1.67471	1.2025	2.37845	4.44059	4.52515	4.54618	1.91835e-15	3.16237e-15
Bv_016870_ntrs	black	60.4459	hypothetical protein BVRB_016870 [Beta vulgaris subsp. vulgaris]	NA	NA	NA	NA	1.42777	1.16922	1.1488	2.18165	2.21287	2.08329	1.35163	1.46906	1.856	1.63358	1.23607	1.9842	0.262493	0.412036	0.29223	6.74112e-19	1.22783e-18
Bv2_040750_pozt	black	60.3776	PREDICTED: serine/threonine-protein kinase D6PKL1 [Beta vulgaris subsp. vulgaris]	GO:0004674(protein serine/threonine kinase activity);GO:0005634(nucleus);GO:0005737(cytoplasm);GO:0005886(plasma membrane);GO:0035556(intracellular signal transduction)	NA	NA	NA	7.79402	8.24819	9.56863	2.82115	1.6037	2.79332	6.0024	5.89185	5.07563	9.21359	10.3749	9.15	17.2583	20.5846	18.4053	1.15429e-74	5.55597e-74
Bv1_015540_xjzn	black	60.1066	hypothetical protein BVRB_1g015540 isoform A [Beta vulgaris subsp. vulgaris];PREDICTED: protein MRG1 isoform X1 [Beta vulgaris subsp. vulgaris];PREDICTED: protein MRG2 isoform X3 [Beta vulgaris subsp. vulgaris]	GO:0000123(histone acetyltransferase complex);GO:0006338(chromatin remodeling);GO:0016573(histone acetylation);GO:0016573(histone acetylation)	NA	NA	NA	14.6134	15.4382	15.301	7.41221	6.44906	6.53439	14.996	13.9378	13.5532	11.6247	13.1118	16.5595	20.9035	20.8965	22.9726	1.56056e-33	4.02361e-33
Bv6_155490_cimk	black	60.0806	hypothetical protein BVRB_6g155490 [Beta vulgaris subsp. vulgaris]	GO:0004650(polygalacturonase activity);GO:0005576(extracellular region);GO:0005975(carbohydrate metabolic process);GO:0009826(unidimensional cell growth);GO:0016829(lyase activity);GO:0045490(pectin catabolic process);GO:0048046(apoplast);GO:0052546(cell wall pectin metabolic process);GO:0060773(flower phyllotactic patterning)	00040(Pentose and glucuronate interconversions)	K01213	EC:3.2.1.67	15.8159	18.0247	21.4675	6.89557	3.63701	4.69058	14.4631	13.4158	13.4382	19.8542	20.7301	20.1868	34.0864	29.116	33.3156	5.797e-48	1.92614e-47
Bv5_098180_tkcu	black	59.8418	PREDICTED: non-specific lipid-transfer protein-like protein At5g64080 [Beta vulgaris subsp. vulgaris]	NA	NA	NA	NA	7.97852	6.79129	6.53237	0.0001	0.0001	0.0001	0.104403	0.0001	0.0001	8.30055	8.33701	6.46025	14.3762	13.6104	13.5563	5.25e-183	5.96289e-182
Bv_001040_ftrj	black	59.6585	PREDICTED: galactan beta-1,4-galactosyltransferase GALS1 [Beta vulgaris subsp. vulgaris]	GO:0000139(Golgi membrane);GO:0005794(Golgi apparatus);GO:0016021(integral component of membrane);GO:0042546(cell wall biogenesis);GO:0045489(pectin biosynthetic process);GO:0048531(beta-1,3-galactosyltransferase activity);GO:0071555(cell wall organization)	NA	NA	NA	57.0641	60.7217	59.1911	166.236	171.339	173.834	72.4341	79.7826	90.6993	99.4701	98.0968	101.258	43.2595	44.8391	45.0589	2.55987e-191	3.0575e-190
Bv5_110880_thqh	black	59.5618	PREDICTED: carbon catabolite repressor protein 4 homolog 5 [Beta vulgaris subsp. vulgaris]	GO:0003723(RNA binding);GO:0004535(poly(A)-specific ribonuclease activity);GO:0005634(nucleus);GO:0005737(cytoplasm);GO:0006351(transcription, DNA-templated);GO:0006355(regulation of transcription, DNA-templated);GO:0046872(metal ion binding)	NA	NA	NA	38.3575	35.6775	36.8969	22.5164	23.4605	23.5705	16.6568	17.5137	16.2931	26.4222	29.8584	27.2497	45.8835	46.4066	44.922	2.04779e-121	1.52114e-120
Bv8_200470_yxrw	black	59.5586	PREDICTED: 15.4 kDa class V heat shock protein [Beta vulgaris subsp. vulgaris]	GO:0005737(cytoplasm);GO:0009408(response to heat)	04141(Protein processing in endoplasmic reticulum)	K13993	NA	20.5465	17.8778	22.0706	11.9645	11.5346	11.2807	7.94095	10.7423	8.28739	17.7346	13.8658	14.1905	26.604	24.8079	28.6668	2.22355e-36	6.02868e-36
Bv7_164120_fciq	black	59.554	PREDICTED: heavy metal-associated isoprenylated plant protein 35 [Beta vulgaris subsp. vulgaris]	GO:0005737(cytoplasm);GO:0030001(metal ion transport);GO:0046914(transition metal ion binding);GO:0046916(cellular transition metal ion homeostasis)	NA	NA	NA	8.11972	8.90624	8.0803	2.01677	1.85274	2.57164	8.50812	8.62683	8.92663	7.11557	7.9768	6.97622	16.2476	15.8296	13.8869	6.78204e-88	3.73091e-87
Bv5_123270_aizp	black	59.2444	hypothetical protein BVRB_5g123270 [Beta vulgaris subsp. vulgaris]	GO:0005509(calcium ion binding);GO:0005544(calcium-dependent phospholipid binding);GO:0005886(plasma membrane)	00270(Cysteine and methionine metabolism);00450(Selenocompound metabolism)	K00549	EC:2.1.1.14	14.425	15.8808	15.2422	5.49793	5.85636	6.2627	5.49405	9.05982	5.57877	11.6066	14.0046	14.764	20.2768	20.4134	18.4186	5.53741e-37	1.51915e-36
Bv9_220421z3328	black	58.8721	0	NA	NA	NA	NA	9.62284	12.0182	13.5696	5.86942	5.11081	5.31495	3.88672	3.96541	4.34808	10.562	12.5379	10.1652	18.2321	18.3975	19.5953	3.77066e-44	1.17317e-43
Bv3_056870_rcmw	black	58.7507	PREDICTED: nuclear poly(A) polymerase 3-like isoform X1 [Beta vulgaris subsp. vulgaris]	GO:0004652(polynucleotide adenylyltransferase activity);GO:0005634(nucleus);GO:0006378(mRNA polyadenylation)	03015(mRNA surveillance pathway)	K14376	EC:2.7.7.19	2.27761	2.77311	2.00658	0.410259	0.16487	0.0532012	0.750195	1.06725	0.521417	2.38911	1.99635	1.67424	7.85153	7.25367	6.1543	2.89206e-33	7.42337e-33
Bv3_060710_pkjc	black	58.3115	PREDICTED: polygalacturonase inhibitor [Beta vulgaris subsp. vulgaris]	GO:0005576(extracellular region);GO:0005618(cell wall);GO:0005829(cytosol);GO:0006952(defense response);GO:0007165(signal transduction);GO:0009505(plant-type cell wall);GO:0009506(plasmodesma);GO:0016020(membrane);GO:0090353(polygalacturonase inhibitor activity)	NA	NA	NA	1.18199	1.21401	1.73683	5.63621	5.7876	7.00577	1.78961	1.98225	2.94935	3.05125	3.05286	3.56166	0.382796	0.299132	0.468996	2.43119e-68	1.08696e-67
Bv3_058990_amoc	black	58.1615	PREDICTED: protein GIGAS CELL1 [Beta vulgaris subsp. vulgaris]	GO:0005515(protein binding);GO:0005634(nucleus);GO:0006260(DNA replication);GO:0006952(defense response);GO:0007088(regulation of mitotic nuclear division);GO:0007113(endomitotic cell cycle);GO:0007127(meiosis I);GO:0007135(meiosis II);GO:0009561(megagametogenesis);GO:0009960(endosperm development);GO:0040020(regulation of meiotic nuclear division);GO:0051301(cell division);GO:1900426(positive re…	NA	NA	NA	27.621	27.1851	27.4845	13.2093	12.6601	13.0631	24.7637	22.1525	23.1472	21.4865	20.7906	23.071	28.2037	28.601	28.04	5.18477e-69	2.34178e-68
Bv6_136810_rqns	black	58.0893	PREDICTED: beta-glucosidase 40 isoform X1 [Beta vulgaris subsp. vulgaris]	GO:0008422(beta-glucosidase activity);GO:1901657(glycosyl compound metabolic process)	00500(Starch and sucrose metabolism);00460(Cyanoamino acid metabolism);00940(Phenylpropanoid biosynthesis)	K01188	EC:3.2.1.21	20.4201	19.991	20.5629	83.2214	80.5103	84.6838	28.5511	28.4035	29.8343	36.2401	35.8861	35.7804	6.27965	5.98472	7.51049	0	0
Bv6_131170_gezt	black	57.9448	PREDICTED: squamosa promoter-binding-like protein 16 isoform X1 [Beta vulgaris subsp. vulgaris]	GO:0003677(DNA binding);GO:0003700(DNA binding transcription factor activity);GO:0005634(nucleus);GO:0006355(regulation of transcription, DNA-templated);GO:0048653(anther development)	NA	NA	NA	1.35957	1.12291	1.31326	0.0717669	0.143745	0.446446	1.19278	0.854941	0.925981	0.595535	0.950852	0.902036	1.94022	2.76782	2.11087	1.55088e-09	2.11985e-09
Bv8_186740_eezq	black	57.8914	hypothetical protein BVRB_8g186740 [Beta vulgaris subsp. vulgaris]	GO:0000977(RNA polymerase II regulatory region sequence-specific DNA binding);GO:0003700(DNA binding transcription factor activity);GO:0005634(nucleus);GO:0006357(regulation of transcription by RNA polymerase II)	00510(N-Glycan biosynthesis)	K07441	EC:2.4.1.141	3.25375	4.66245	5.0733	1.40679	1.20502	2.18554	0.823533	1.14287	0.474911	2.23211	2.59379	2.27914	7.07014	6.13275	8.0415	1.28218e-19	2.38738e-19
Bv6_127580_jufj	black	57.5701	PREDICTED: zinc finger protein 4 [Beta vulgaris subsp. vulgaris]	GO:0003676(nucleic acid binding);GO:0003700(DNA binding transcription factor activity);GO:0005634(nucleus);GO:0006355(regulation of transcription, DNA-templated);GO:0008270(zinc ion binding);GO:0009738(abscisic acid-activated signaling pathway);GO:0009788(negative regulation of abscisic acid-activated signaling pathway);GO:0019760(glucosinolate metabolic process);GO:0043565(sequence-specific DNA …	NA	NA	NA	25.1967	25.6403	19.7351	13.3823	9.53314	10.7445	8.98346	14.1422	9.05499	24.591	15.1794	17.6309	35.4616	33.5073	31.5313	3.98061e-24	8.3377e-24
Bv1_009300_pzfz	black	57.3748	PREDICTED: probable xyloglucan endotransglucosylase/hydrolase protein 23 [Beta vulgaris subsp. vulgaris]	GO:0004553(hydrolase activity, hydrolyzing O-glycosyl compounds);GO:0005576(extracellular region);GO:0005618(cell wall);GO:0005794(Golgi apparatus);GO:0010411(xyloglucan metabolic process);GO:0016762(xyloglucan:xyloglucosyl transferase activity);GO:0016798(hydrolase activity, acting on glycosyl bonds);GO:0042546(cell wall biogenesis);GO:0048046(apoplast);GO:0071555(cell wall organization)	04075(Plant hormone signal transduction)	K14504	EC:2.4.1.207	538.83	510.818	506.562	1415.74	1408.42	1386.05	731.185	742.197	721.35	807.18	814.536	798.338	438.188	450.259	445.111	4.13279e-141	3.55558e-140
Bv3_048540_hrgg	black	57.0653	PREDICTED: protein NRT1/ PTR FAMILY 5.2 isoform X1 [Beta vulgaris subsp. vulgaris]	GO:0005215(transporter activity);GO:0005886(plasma membrane);GO:0006857(oligopeptide transport);GO:0009611(response to wounding);GO:0009737(response to abscisic acid);GO:0009751(response to salicylic acid);GO:0009753(response to jasmonic acid);GO:0015333(peptide:proton symporter activity);GO:0016020(membrane);GO:0016021(integral component of membrane);GO:0022857(transmembrane transporter activity…	NA	NA	NA	3.62537	2.75246	2.64553	1.08841	1.27571	1.32265	2.84527	1.97778	1.76924	2.82314	3.59703	2.66524	6.32962	5.18965	5.6778	2.43948e-18	4.36864e-18
Bv5_124710_ixzy	black	56.8539	hypothetical protein BVRB_5g124710 [Beta vulgaris subsp. vulgaris]	GO:0009507(chloroplast);GO:0016597(amino acid binding)	NA	NA	NA	9.60357	10.0955	9.60939	5.18764	6.53479	5.07387	3.32693	3.28795	3.10323	5.50632	7.45635	6.08272	16.7468	15.06	15.0818	3.13921e-58	1.23199e-57
Bv3_064680_oenm	black	56.4113	PREDICTED: probably inactive leucine-rich repeat receptor-like protein kinase At3g28040 [Beta vulgaris subsp. vulgaris]	GO:0004672(protein kinase activity);GO:0004674(protein serine/threonine kinase activity);GO:0005524(ATP binding);GO:0005886(plasma membrane);GO:0006468(protein phosphorylation);GO:0007169(transmembrane receptor protein tyrosine kinase signaling pathway);GO:0016021(integral component of membrane);GO:0016301(kinase activity);GO:0016310(phosphorylation)	NA	NA	NA	6.8281	6.66852	6.248	1.63645	2.64717	1.50885	3.30587	3.26941	3.64617	7.36346	8.25914	8.17965	11.3431	12.7239	11.794	1.87046e-73	8.87485e-73
Bv5_097790_hgmw	black	56.3904	PREDICTED: probable lipid phosphate phosphatase beta isoform X1 [Beta vulgaris subsp. vulgaris];hypothetical protein BVRB_5g097790 isoform A [Beta vulgaris subsp. vulgaris]	GO:0016021(integral component of membrane);GO:0016787(hydrolase activity);GO:0016787(hydrolase activity)	NA	NA	NA	6.39281	6.10009	6.95522	2.9202	2.8338	3.80739	3.5311	3.69874	5.56556	5.70979	5.37408	6.90159	8.03435	8.44418	9.23685	1.24526e-14	2.00355e-14
Bv2_046960_yzfq	black	56.3049	hypothetical protein BVRB_2g046960 [Beta vulgaris subsp. vulgaris]	NA	NA	NA	NA	10.7184	11.4791	11.3183	6.08019	5.54071	2.22494	3.03831	6.29542	4.62147	9.8339	8.49724	8.46875	21.6711	25.4724	18.1722	9.37435e-15	1.51263e-14
Bv3_054540_pwkz	black	56.2475	PREDICTED: pentatricopeptide repeat-containing protein At2g19280 isoform X1 [Beta vulgaris subsp. vulgaris]	NA	NA	NA	NA	9.91653	10.3351	11.4486	4.28849	5.92776	4.96453	8.42127	7.4739	6.94284	3.35456	5.59692	7.14477	12.803	13.1529	13.1352	4.2801e-13	6.57376e-13
Bv1_015510_uinm	black	56.1069	hypothetical protein BVRB_1g015510 [Beta vulgaris subsp. vulgaris]	NA	NA	NA	NA	41.2894	39.1909	35.1576	70.4144	66.6697	70.4902	62.4601	50.8115	51.3706	36.8807	32.8287	34.3768	19.2406	14.96	15.9838	2.00807e-103	1.28494e-102
Bv9_221330_dohi	black	56.0528	PREDICTED: protein NRT1/ PTR FAMILY 1.2 [Beta vulgaris subsp. vulgaris]	GO:0005215(transporter activity);GO:0005886(plasma membrane);GO:0006857(oligopeptide transport);GO:0015706(nitrate transport);GO:0016020(membrane);GO:0016021(integral component of membrane);GO:0055085(transmembrane transport);GO:0080054(low-affinity nitrate transmembrane transporter activity)	NA	NA	NA	52.13	51.5168	49.2874	159.856	165.758	175.509	88.0572	93.7658	91.9683	105.812	105.422	102.946	55.1029	57.8231	54.7238	1.49064e-201	1.89236e-200
Bv9_206580_agtp	black	55.8813	PREDICTED: E3 ubiquitin-protein ligase RMA1H1 [Beta vulgaris subsp. vulgaris]	GO:0004842(ubiquitin-protein transferase activity);GO:0005515(protein binding);GO:0005789(endoplasmic reticulum membrane);GO:0006970(response to osmotic stress);GO:0009409(response to cold);GO:0009414(response to water deprivation);GO:0009611(response to wounding);GO:0009723(response to ethylene);GO:0016567(protein ubiquitination);GO:0043161(proteasome-mediated ubiquitin-dependent protein catabol…	04141(Protein processing in endoplasmic reticulum)	K10666	EC:2.3.2.27	68.6601	67.6096	64.5803	32.802	33.9755	32.9314	37.1613	37.4228	41.0841	29.4158	27.3681	27.9212	71.6172	68.5069	65.144	2.29006e-116	1.63395e-115
Bv9_210930_kwfz	black	55.6048	hypothetical protein BVRB_9g210930 [Beta vulgaris subsp. vulgaris]	GO:0003723(RNA binding);GO:0004519(endonuclease activity);GO:0005739(mitochondrion);GO:0009451(RNA modification);GO:0043231(intracellular membrane-bounded organelle)	NA	NA	NA	9.65502	8.99513	8.88205	4.62539	4.47482	4.0924	4.6951	4.98741	4.02128	10.0705	10.5476	7.22997	19.1757	15.0593	15.0287	1.21744e-29	2.89364e-29
Bv9_224720_aigq	black	55.3205	PREDICTED: uncharacterized protein LOC104883135 [Beta vulgaris subsp. vulgaris]	GO:0003674(molecular_function);GO:0005634(nucleus);GO:0006979(response to oxidative stress);GO:0016607(nuclear speck);GO:0046686(response to cadmium ion)	NA	NA	NA	689.793	672.956	689.313	194.029	201.479	197.02	204.777	240.519	229.007	189.842	186.999	198.57	655.945	594.771	651.448	0	0
Bv2_030820_uzuf	black	55.3043	hypothetical protein BVRB_017750, partial [Beta vulgaris subsp. vulgaris]	NA	NA	NA	NA	1.89509	1.38174	1.82551	0.172647	0.315388	0.528969	1.58214	1.91054	1.72513	1.30326	1.09711	1.3231	2.39971	2.43077	2.41492	8.38956e-20	1.5678e-19
Bv5_107590_aket	black	55.1202	hypothetical protein BVRB_5g107590 isoform C [Beta vulgaris subsp. vulgaris];hypothetical protein BVRB_5g107590 isoform B [Beta vulgaris subsp. vulgaris]	GO:0005634(nucleus);GO:0005802(trans-Golgi network);GO:0005829(cytosol);GO:0005905(clathrin-coated pit);GO:0006886(intracellular protein transport);GO:0016192(vesicle-mediated transport);GO:0030124(AP-4 adaptor complex);GO:0030125(clathrin vesicle coat);GO:0030131(clathrin adaptor complex);GO:0030131(clathrin adaptor complex)	NA	NA	NA	7.62086	7.35378	9.79353	2.66716	2.61497	2.44113	2.19903	1.53784	2.26861	6.57559	7.31676	7.24017	12.7836	9.45821	11.7905	7.96974e-55	2.95252e-54
Bv6_153450_mnrw	black	54.9157	PREDICTED: phosphate transporter PHO1 homolog 10 [Beta vulgaris subsp. vulgaris]	GO:0005886(plasma membrane);GO:0006817(phosphate ion transport);GO:0016021(integral component of membrane)	NA	NA	NA	6.09519	5.86069	5.64426	29.4288	27.6335	27.2754	9.5481	8.33806	9.72928	17.3631	17.9999	16.7571	4.58989	4.82619	4.73395	3.70109e-248	5.98832e-247
Bv4_081370_guih	black	54.8407	PREDICTED: probable linoleate 9S-lipoxygenase 5 isoform X3 [Beta vulgaris subsp. vulgaris]	GO:0016165(linoleate 13S-lipoxygenase activity)	00591(Linoleic acid metabolism)	K15718	EC:1.13.11.58	28.4363	24.5918	29.1727	12.576	11.8974	12.092	17.6195	18.1904	19.7534	31.7642	35.7375	36.1853	57.7239	52.8727	56.0653	1.57019e-106	1.02761e-105
Bv4_088990_hqhd	black	54.7251	PREDICTED: uncharacterized protein LOC104891733 [Beta vulgaris subsp. vulgaris]	NA	03013(RNA transport)	K12160	NA	5.04148	4.90211	5.69716	1.76162	1.65637	2.5995	4.32334	3.55331	4.1871	5.5325	5.49474	6.22374	8.64635	7.54853	10.1222	8.19916e-18	1.44957e-17
Bv3_063100_srwc	black	54.5605	PREDICTED: probable auxin efflux carrier component 1b [Beta vulgaris subsp. vulgaris]	GO:0005783(endoplasmic reticulum);GO:0005886(plasma membrane);GO:0009926(auxin polar transport);GO:0010252(auxin homeostasis);GO:0010329(auxin efflux transmembrane transporter activity)	NA	NA	NA	22.101	19.0005	19.6671	7.15329	7.22829	6.90726	20.4656	18.0652	18.6059	19.5121	19.8993	19.6187	28.4334	25.8665	25.74	1.34759e-118	9.8105e-118
Bv6_156090_wcdo	black	54.1376	hypothetical protein BVRB_6g156090 [Beta vulgaris subsp. vulgaris]	NA	NA	NA	NA	9.61385	6.57052	9.11856	0.420938	0.317059	0.404556	0.0001	0.0001	0.0001	0.0001	0.0001	0.0001	8.36685	9.57317	7.86317	4.5464e-71	2.10505e-70
Bv5_111700_juyc	black	53.7635	PREDICTED: uncharacterized protein LOC109135224 [Beta vulgaris subsp. vulgaris]	GO:0000077(DNA damage checkpoint);GO:0003684(damaged DNA binding);GO:0006281(DNA repair);GO:0030896(checkpoint clamp complex)	NA	NA	NA	1.52033	1.88753	1.71993	0.764837	1.13719	0.636998	0.302232	0.0380199	0.276142	1.44801	0.98467	1.20796	2.93799	3.0467	3.12321	3.13826e-25	6.74989e-25
Bv7_171420_dcuk	black	53.6046	hypothetical protein BVRB_7g171420 [Beta vulgaris subsp. vulgaris]	NA	NA	NA	NA	19.0506	18.4088	21.9262	6.76299	6.27176	6.01577	18.1095	18.636	19.5175	16.8115	12.6376	14.2842	26.7465	20.3487	25.8673	1.79176e-49	6.09424e-49
Bv5_111210_pjep	black	53.4465	hypothetical protein BVRB_5g111210 [Beta vulgaris subsp. vulgaris]	NA	NA	NA	NA	1.36634	1.50507	1.31872	0.340328	0.528551	0.520605	0.258225	0.18746	0.195478	0.890909	0.598997	0.599984	1.48972	1.67322	1.44609	1.07054e-34	2.81408e-34
Bv8_194790_wwey	black	53.2872	hypothetical protein BVRB_8g194790 [Beta vulgaris subsp. vulgaris]	GO:0000398(mRNA splicing, via spliceosome);GO:0004004(ATP-dependent RNA helicase activity);GO:0005681(spliceosomal complex);GO:0005737(cytoplasm)	03040(Spliceosome)	K12813	EC:3.6.4.13	7.93285	6.65059	8.53441	0.607677	1.4317	1.01839	4.57245	4.65126	6.6325	0.897323	0.666875	0.912212	10.1761	8.98398	9.4151	2.09484e-57	8.10066e-57
Bv7_160070_wqzt	black	53.0228	PREDICTED: probable serine/threonine-protein kinase kinX [Beta vulgaris subsp. vulgaris]	GO:0005634(nucleus);GO:0008168(methyltransferase activity);GO:0032259(methylation)	NA	NA	NA	204.658	199.824	215.848	96.7298	98.8275	113.417	105.068	112.504	132.152	220.192	196.516	206.845	268.04	252.959	252.039	1.74893e-80	8.9541e-80
Bv9_210420_tgwo	black	52.7798	hypothetical protein BVRB_9g210420 [Beta vulgaris subsp. vulgaris]	GO:0003755(peptidyl-prolyl cis-trans isomerase activity);GO:0005528(FK506 binding);GO:0005789(endoplasmic reticulum membrane);GO:0061077(chaperone-mediated protein folding)	NA	NA	NA	20.9986	18.0077	14.6905	4.73899	6.01175	0.408884	1.07957	1.15079	0.695847	2.50937	1.65513	16.1837	48.7502	39.0904	44.8806	4.99523e-15	8.12725e-15
Bv6_128650_uenw	black	52.5892	PREDICTED: 1-aminocyclopropane-1-carboxylate synthase 3 [Beta vulgaris subsp. vulgaris]	GO:0016847(1-aminocyclopropane-1-carboxylate synthase activity)	00270(Cysteine and methionine metabolism)	K01762	EC:4.4.1.14	3.93379	3.90291	4.55045	10.7569	11.8043	10.3759	5.53639	7.14271	6.12537	6.89177	8.54143	7.92917	4.94088	3.88874	3.76358	6.52835e-37	1.78764e-36
Bv3_060370_kdzu	black	52.5209	PREDICTED: uncharacterized protein LOC104889208 [Beta vulgaris subsp. vulgaris]	GO:0003674(molecular_function);GO:0008150(biological_process)	NA	NA	NA	2.50585	1.5743	2.30636	0.742206	0.739988	0.55003	1.59598	1.40263	1.73542	2.07751	2.39784	2.20497	3.50886	4.46924	5.21652	8.42744e-22	1.66176e-21
Bv7_179860_muam	black	52.3861	PREDICTED: L-type lectin-domain containing receptor kinase VIII.1 [Beta vulgaris subsp. vulgaris]	GO:0004674(protein serine/threonine kinase activity);GO:0005524(ATP binding);GO:0005886(plasma membrane);GO:0006468(protein phosphorylation);GO:0016021(integral component of membrane);GO:0016301(kinase activity);GO:0030246(carbohydrate binding)	NA	NA	NA	13.4846	13.5355	14.4633	6.21941	3.9331	6.03073	12.2514	14.9824	12.4347	11.6882	11.1584	11.1182	17.0084	16.1421	15.7527	2.4992e-27	5.64334e-27
Bv9_220420_naah	black	52.3116	0	NA	NA	NA	NA	84.9662	88.8397	96.5693	45.1618	33.4567	41.011	46.1097	40.7539	46.1852	94.2473	94.2141	94.813	135	116.274	116.568	1.78064e-98	1.0891e-97
Bv3_049000_eejt	black	52.3042	PREDICTED: legumin B [Beta vulgaris subsp. vulgaris]	GO:0000326(protein storage vacuole);GO:0005634(nucleus);GO:0009737(response to abscisic acid);GO:0010431(seed maturation);GO:0045735(nutrient reservoir activity);GO:0071215(cellular response to abscisic acid stimulus)	NA	NA	NA	1.71961	1.73085	1.87553	3.93132	4.35717	4.12583	2.47593	1.80533	1.90187	2.32114	2.28135	1.68699	0.426599	1.30757	0.581143	2.34545e-12	3.52338e-12
Bv4_077860_jqdf	black	51.9021	PREDICTED: 4,5-DOPA dioxygenase extradiol [Beta vulgaris subsp. vulgaris]	GO:0006725(cellular aromatic compound metabolic process);GO:0046566(DOPA dioxygenase activity);GO:0055114(oxidation-reduction process)	00965(Betalain biosynthesis)	K15777	EC:1.13.11.-	7.37478	8.00553	7.00759	2.56719	2.22025	2.41963	0.670241	1.04152	0.975894	3.5989	4.20849	3.36266	7.62592	8.26697	7.746	4.47595e-103	2.85543e-102
Bv8_200990_pqjh	black	51.6953	hypothetical protein BVRB_8g200990 [Beta vulgaris subsp. vulgaris]	GO:0004674(protein serine/threonine kinase activity);GO:0005886(plasma membrane)	NA	NA	NA	30.5983	27.1505	30.4569	10.9608	12.9564	12.8518	25.3703	27.6974	22.1585	25.5512	21.9114	21.7335	31.4553	29.4127	31.811	2.96035e-36	8.00462e-36
Bv_013061z405	black	51.6709	PREDICTED: anaphase-promoting complex subunit 1 [Beta vulgaris subsp. vulgaris]	GO:0000151(ubiquitin ligase complex);GO:0004842(ubiquitin-protein transferase activity);GO:0005634(nucleus);GO:0005680(anaphase-promoting complex);GO:0006511(ubiquitin-dependent protein catabolic process);GO:0007049(cell cycle);GO:0009553(embryo sac development);GO:0009793(embryo development ending in seed dormancy);GO:0010252(auxin homeostasis);GO:0016021(integral component of membrane);GO:00165…	04120(Ubiquitin mediated proteolysis)	K03348	NA	10.134	10.2055	12.58	5.47527	4.27426	4.90904	3.11784	1.82607	2.75244	7.05749	7.7956	6.81122	11.7167	14.0628	16.7838	3.03396e-37	8.35968e-37
Bv5_108560_iiou	black	50.9711	hypothetical protein BVRB_5g108560 [Beta vulgaris subsp. vulgaris]	NA	NA	NA	NA	4.21088	4.12739	3.81736	1.85092	2.30834	2.1028	0.87232	1.31928	1.0519	3.52798	3.1973	3.33173	5.34059	6.96915	5.38486	8.71391e-31	2.12354e-30
Bv5_125730_kdyt	black	50.9665	hypothetical protein BVRB_5g125730 [Beta vulgaris subsp. vulgaris]	GO:0003674(molecular_function);GO:0005634(nucleus);GO:0008150(biological_process)	NA	NA	NA	5.7854	6.36927	6.84236	11.6352	10.827	12.5551	5.07738	6.06279	6.1357	6.86176	6.63913	6.42332	2.86285	2.93764	2.80533	1.44309e-128	1.12988e-127
Bv5_109600_npwy	black	50.8665	PREDICTED: UDP-arabinose 4-epimerase 1 [Beta vulgaris subsp. vulgaris]	GO:0003824(catalytic activity);GO:0003978(UDP-glucose 4-epimerase activity);GO:0005794(Golgi apparatus);GO:0006012(galactose metabolic process);GO:0009225(nucleotide-sugar metabolic process);GO:0009832(plant-type cell wall biogenesis);GO:0016021(integral component of membrane);GO:0019567(arabinose biosynthetic process);GO:0032580(Golgi cisterna membrane);GO:0033358(UDP-L-arabinose biosynthetic pr…	00520(Amino sugar and nucleotide sugar metabolism)	K12448	EC:5.1.3.5	123.5	124.775	126.568	279.3	258.281	270.453	250.687	228.9	224.482	230.626	229.847	223.004	154.036	154.569	152.403	9.68537e-108	6.43172e-107
Bv_005250_atya	black	49.9827	hypothetical protein BVRB_5g106290 [Beta vulgaris subsp. vulgaris]	GO:0005634(nucleus);GO:0006272(leading strand elongation);GO:0006298(mismatch repair);GO:0019985(translesion synthesis);GO:0030337(DNA polymerase processivity factor activity);GO:0043626(PCNA complex)	03030(DNA replication);03410(Base excision repair);03420(Nucleotide excision repair);03430(Mismatch repair)	K04802	NA	0.379824	0.413985	0.295148	3.13985	1.96217	2.68964	0.587503	0.665677	0.428176	1.44723	1.50445	1.41588	0.0001	0.0001	0.0001	3.94027e-82	2.04547e-81
Bv3_066350_xfje	black	49.9581	PREDICTED: heat stress transcription factor B-2a [Beta vulgaris subsp. vulgaris]	GO:0005634(nucleus)	NA	NA	NA	70.3572	67.9862	72.4681	31.5886	30.2193	24.705	30.8358	32.267	34.9412	39.0501	36.0722	37.8867	63.1658	58.3214	65.2142	1.38329e-67	6.11115e-67
Bv8_183270_gofx	black	49.8391	hypothetical protein BVRB_8g183270 [Beta vulgaris subsp. vulgaris]	NA	NA	NA	NA	2.35442	2.77316	3.25758	0.150454	0.0001	0.0001	0.304867	0.557908	0.153946	0.131029	0.0001	0.0001	2.41631	2.586	2.14345	1.45025e-20	2.76377e-20
Bv5_112670_kztr	black	49.8317	hypothetical protein BVRB_5g112670 isoform B [Beta vulgaris subsp. vulgaris];hypothetical protein BVRB_5g112670 isoform A [Beta vulgaris subsp. vulgaris]	GO:0003723(RNA binding);GO:0004525(ribonuclease III activity);GO:0005634(nucleus);GO:0005737(cytoplasm);GO:0016442(RISC complex);GO:0030422(production of siRNA involved in RNA interference);GO:0030422(production of siRNA involved in RNA interference)	02010(ABC transporters);02010(ABC transporters)	K05666	NA	10.8674	10.7422	11.0224	2.70516	2.55936	2.83735	1.50359	2.21146	1.12624	2.95443	2.91674	2.46106	9.22161	10.8262	9.82023	5.61333e-103	3.57381e-102
Bv4_092350_tjty	black	49.7327	PREDICTED: scarecrow-like protein 21 [Beta vulgaris subsp. vulgaris]	GO:0003700(DNA binding transcription factor activity);GO:0005634(nucleus);GO:0006355(regulation of transcription, DNA-templated);GO:0043565(sequence-specific DNA binding)	04075(Plant hormone signal transduction)	K14494	NA	158.618	154.655	155.868	319.604	314.637	321.746	181.694	175.247	176.723	207.902	222.227	219.877	146.128	152.745	152.836	1.68052e-92	9.67677e-92
Bv2_040540_duix	black	49.6053	PREDICTED: probable xyloglucan endotransglucosylase/hydrolase protein 23 [Beta vulgaris subsp. vulgaris]	GO:0004553(hydrolase activity, hydrolyzing O-glycosyl compounds);GO:0005576(extracellular region);GO:0005618(cell wall);GO:0005794(Golgi apparatus);GO:0010411(xyloglucan metabolic process);GO:0016762(xyloglucan:xyloglucosyl transferase activity);GO:0016798(hydrolase activity, acting on glycosyl bonds);GO:0042546(cell wall biogenesis);GO:0048046(apoplast);GO:0071555(cell wall organization)	04075(Plant hormone signal transduction)	K14504	EC:2.4.1.207	268.052	258.027	285.046	757.231	784.412	784.956	361.873	404.468	411.448	528.709	492.343	485.157	299.891	301.049	297.895	1.50061e-113	1.05093e-112
Bv5_103230_fize	black	49.3683	PREDICTED: uncharacterized protein LOC104892545 isoform X2 [Beta vulgaris subsp. vulgaris];PREDICTED: uncharacterized protein LOC104892545 isoform X1 [Beta vulgaris subsp. vulgaris]	NA	NA	NA	NA	1.18639	1.34091	1.37864	0.467159	0.308031	0.304552	1.26991	0.559941	0.64199	1.24016	1.38172	1.335	1.81091	2.42277	2.93716	5.37492e-18	9.54083e-18
Bv6_152020_afhj	black	48.8132	PREDICTED: pentatricopeptide repeat-containing protein At1g34160 [Beta vulgaris subsp. vulgaris]	GO:0005739(mitochondrion);GO:0080156(mitochondrial mRNA modification)	03440(Homologous recombination)	K10683	NA	1.505	1.55843	1.76167	0.639793	0.655321	0.0001	1.27364	1.84386	1.77272	1.07426	1.2809	1.31303	2.27342	2.62079	2.3778	0.0039605	0.00430826
Bv3_069460_pdgi	black	48.7073	PREDICTED: factor Xa inhibitor BuXI [Beta vulgaris subsp. vulgaris]	NA	NA	NA	NA	157.612	158.132	167.211	54.8453	56.3894	56.3995	42.1276	43.8749	47.0404	174.722	164.6	174.348	224.454	218.547	233.258	0	0
Bv7_175030_gmuz	black	48.383	PREDICTED: laccase-3 [Beta vulgaris subsp. vulgaris]	GO:0005507(copper ion binding);GO:0016722(oxidoreductase activity, oxidizing metal ions)	NA	NA	NA	64.8946	62.1472	64.7585	48.5136	41.1491	41.752	25.8509	24.3337	22.2553	50.6148	56.8825	58.16	86.1339	91.6541	92.5455	6.20714e-115	4.39572e-114
Bv4_077610_cdyk	black	48.329	PREDICTED: 7-deoxyloganetic acid glucosyltransferase [Beta vulgaris subsp. vulgaris]	GO:0009813(flavonoid biosynthetic process);GO:0043231(intracellular membrane-bounded organelle);GO:0052696(flavonoid glucuronidation);GO:0080043(quercetin 3-O-glucosyltransferase activity);GO:0080044(quercetin 7-O-glucosyltransferase activity)	NA	NA	NA	2.39087	2.13573	1.8773	0.714683	1.28583	0.783976	0.630271	0.313126	0.615431	1.04668	0.701225	0.934757	2.65864	2.5409	2.21339	2.29151e-17	4.00319e-17
Bv6_152040_ospw	black	48.3282	hypothetical protein BVRB_6g152040 [Beta vulgaris subsp. vulgaris]	GO:0003674(molecular_function);GO:0005634(nucleus);GO:0008150(biological_process);GO:0016021(integral component of membrane)	NA	NA	NA	14.4094	14.2667	15.7438	7.89183	6.86204	6.17119	15.6025	10.4765	13.4068	8.06095	7.08041	7.66465	17.0943	20.5418	18.3891	8.22417e-23	1.6651e-22
Bv8_184720_kdoj	black	48.2003	PREDICTED: pentatricopeptide repeat-containing protein At5g64320, mitochondrial [Beta vulgaris subsp. vulgaris]	GO:0003723(RNA binding);GO:0004519(endonuclease activity);GO:0005739(mitochondrion);GO:0009451(RNA modification);GO:0032543(mitochondrial translation)	NA	NA	NA	4.33846	4.1821	4.38818	1.33299	2.14068	2.04696	4.47085	3.69583	3.80275	3.16372	3.63263	3.59145	6.02112	4.15528	5.89203	5.15385e-10	7.16908e-10
Bv6_140100_quhk	black	47.9581	PREDICTED: uncharacterized protein LOC104896150 [Beta vulgaris subsp. vulgaris]	NA	NA	NA	NA	1.50521	1.27049	1.20928	0.33359	0.0641789	0.451778	0.422054	0.46246	0.372095	1.45165	1.68529	1.47169	2.08833	2.03474	2.04806	2.24083e-19	4.13945e-19
Bv6_128820_ufoz	black	47.446	PREDICTED: GATA transcription factor 19 [Beta vulgaris subsp. vulgaris]	GO:0000977(RNA polymerase II regulatory region sequence-specific DNA binding);GO:0001085(RNA polymerase II transcription factor binding);GO:0001228(transcriptional activator activity, RNA polymerase II transcription regulatory region sequence-specific DNA binding);GO:0003682(chromatin binding);GO:0005634(nucleus);GO:0005667(transcription factor complex);GO:0030154(cell differentiation)	NA	NA	NA	1.13427	0.713426	0.788806	0.272796	0.561788	0.293005	0.780144	0.653774	0.646023	0.697756	1.07482	0.841426	1.73746	1.33746	1.44731	8.55213e-09	1.14191e-08
Bv4_078280_ymnd	black	47.0981	PREDICTED: protein DELAY OF GERMINATION 1 [Beta vulgaris subsp. vulgaris]	GO:0005634(nucleus);GO:0006351(transcription, DNA-templated);GO:0043565(sequence-specific DNA binding);GO:0080167(response to karrikin)	04075(Plant hormone signal transduction)	K14431	NA	1.82096	2.36089	1.82737	5.77177	5.09333	5.12009	2.5697	2.52336	2.45063	3.14824	3.19486	3.09135	1.90879	1.84514	1.94363	1.99044e-49	6.76272e-49
Bv3_049400_cfjn	black	46.4068	PREDICTED: caffeic acid 3-O-methyltransferase [Beta vulgaris subsp. vulgaris]	GO:0005829(cytosol);GO:0008171(O-methyltransferase activity);GO:0008757(S-adenosylmethionine-dependent methyltransferase activity);GO:0019438(aromatic compound biosynthetic process)	00940(Phenylpropanoid biosynthesis)	K13066	EC:2.1.1.68	6.62116	6.21648	6.40491	1.62211	1.47109	0.924137	8.19575	7.8825	6.73368	4.1611	4.04331	4.06515	8.69845	9.02209	8.89378	2.47221e-80	1.26435e-79
Bv5_122620_jddc	black	45.9199	LL-diaminopimelate aminotransferase, chloroplastic-like [Spinacia oleracea]	GO:0005507(copper ion binding);GO:0005829(cytosol);GO:0008483(transaminase activity);GO:0009089(lysine biosynthetic process via diaminopimelate);GO:0009507(chloroplast);GO:0009570(chloroplast stroma);GO:0009735(response to cytokinin);GO:0009862(systemic acquired resistance, salicylic acid mediated signaling pathway);GO:0010285(L,L-diaminopimelate aminotransferase activity);GO:0030170(pyridoxal ph…	00300(Lysine biosynthesis)	K10206	EC:2.6.1.83	1.86594	2.02147	1.51735	1.05348	0.733193	0.775905	1.6999	1.30652	1.38153	1.66041	1.29141	1.46454	2.6915	1.84006	2.20892	3.95224e-09	5.33572e-09
Bv1_020870_fahw	black	45.8506	PREDICTED: CO(2)-response secreted protease [Beta vulgaris subsp. vulgaris]	GO:0004252(serine-type endopeptidase activity);GO:0005618(cell wall)	NA	NA	NA	106.189	99.8441	101.567	20.6666	22.8343	22.379	116.018	119.729	119.799	81.0924	85.8932	90.0646	134.154	134.395	135.839	0	0
Bv5_102020_wkwk	black	45.7904	PREDICTED: probable leucine-rich repeat receptor-like protein kinase At5g63930 isoform X1 [Beta vulgaris subsp. vulgaris];hypothetical protein BVRB_5g102020 isoform B [Beta vulgaris subsp. vulgaris]	GO:0004674(protein serine/threonine kinase activity);GO:0005886(plasma membrane);GO:0005886(plasma membrane)	NA	NA	NA	11.599	11.0484	11.6002	27.839	28.1742	29.9359	30.1791	28.1341	28.9887	24.9178	26.9877	29.0182	15.2913	14.64	15.7029	1.06754e-109	7.23083e-109
Bv9_206420_uxps	black	45.6726	PREDICTED: uncharacterized protein LOC104901618 [Beta vulgaris subsp. vulgaris]	NA	NA	NA	NA	1.65697	1.76422	2.17762	0.0001	0.0981263	0.0001	0.0001	0.198438	0.147971	0.0818361	0.318253	0.171549	1.53824	1.33401	1.4947	3.37107e-16	5.69315e-16
Bv9_222451z3332	black	44.5639	PREDICTED: lactosylceramide 4-alpha-galactosyltransferase-like [Beta vulgaris subsp. vulgaris]	GO:0005794(Golgi apparatus);GO:0016021(integral component of membrane);GO:0016740(transferase activity);GO:0016757(transferase activity, transferring glycosyl groups)	00601(Glycosphingolipid biosynthesis - lacto and neolacto series);00603(Glycosphingolipid biosynthesis - globo and isoglobo series)	K01988	EC:2.4.1.228	9.44157	10.6867	11.3053	6.12053	5.10911	7.06991	2.63998	5.48199	3.68897	6.04545	4.67762	7.69457	11.9352	12.5916	13.2345	1.16728e-13	1.8238e-13
Bv2_034540_uwcq	black	44.2845	PREDICTED: cytochrome P450 81F3 [Beta vulgaris subsp. vulgaris]	GO:0016020(membrane);GO:0016709(oxidoreductase activity, acting on paired donors, with incorporation or reduction of molecular oxygen, NAD(P)H as one donor, and incorporation of one atom of oxygen);GO:0042343(indole glucosinolate metabolic process);GO:0044550(secondary metabolite biosynthetic process);GO:0098542(defense response to other organism)	NA	NA	NA	20.4993	20.7017	20.003	5.25538	4.42718	5.2228	12.8498	15.9314	14.7606	7.85232	7.16391	6.30527	17.898	18.1966	16.9698	1.13951e-97	6.92056e-97
Bv8_184670_uutm	black	44.2799	hypothetical protein BVRB_8g184670 [Beta vulgaris subsp. vulgaris]	NA	NA	NA	NA	1.11605	0.987919	0.667072	0.157046	0.596704	0.229619	0.570099	0.65064	0.663406	0.567352	0.683528	0.5885	1.65396	1.926	2.67152	3.37171e-07	4.2664e-07
Bv3_057200_upxh	black	44.0991	hypothetical protein BVRB_3g057200 [Beta vulgaris subsp. vulgaris]	NA	NA	NA	NA	1.03499	1.19532	0.802097	0.494442	0.23853	0.16822	0.555115	0.108271	0.390224	1.18619	0.811419	0.753929	1.32135	2.21144	2.43698	8.04517e-09	1.07535e-08
Bv4_071040_cjuq	black	43.8129	PREDICTED: transcription repressor MYB6 isoform X2 [Beta vulgaris subsp. vulgaris]	GO:0000981(RNA polymerase II transcription factor activity, sequence-specific DNA binding);GO:0001135(transcription factor activity, RNA polymerase II transcription factor recruiting);GO:0003677(DNA binding);GO:0003700(DNA binding transcription factor activity);GO:0005634(nucleus);GO:0006351(transcription, DNA-templated);GO:0006355(regulation of transcription, DNA-templated);GO:0006357(regulation…	NA	NA	NA	2.7726	2.94241	2.74292	13.2025	14.6485	16.0022	6.82633	5.1187	4.53813	7.2746	7.66037	8.15779	3.45555	3.78137	3.48068	1.7142e-49	5.83358e-49
Bv1_018370_yfrd	black	43.7398	PREDICTED: squamosa promoter-binding-like protein 8 [Beta vulgaris subsp. vulgaris]	GO:0003677(DNA binding);GO:0005634(nucleus);GO:0005737(cytoplasm);GO:0006351(transcription, DNA-templated);GO:0006355(regulation of transcription, DNA-templated);GO:0009554(megasporogenesis);GO:0009556(microsporogenesis);GO:0030154(cell differentiation);GO:0046872(metal ion binding);GO:0048653(anther development)	NA	NA	NA	4.01477	3.42806	3.05858	6.86948	5.50983	6.34885	3.30273	2.59082	2.83726	5.2486	3.87886	5.44233	1.33888	1.29955	1.20147	1.0376e-31	2.57589e-31
Bv9_220421z3327	black	43.4068	PREDICTED: glycine-rich cell wall structural protein 2-like [Beta vulgaris subsp. vulgaris]	NA	NA	NA	NA	14.3206	14.8729	12.9016	10.5415	8.5388	10.1581	7.58233	4.80344	4.68265	19.7957	15.0868	14.9997	33.7473	29.3753	29.7297	7.61199e-45	2.3998e-44
Bv7_174300_nrqq	black	43.2762	hypothetical protein BVRB_7g174300 [Beta vulgaris subsp. vulgaris]	NA	NA	NA	NA	3.12664	3.3236	2.97662	0.970033	1.04741	1.49732	3.40827	2.02138	3.04203	2.50667	1.87574	2.15957	3.32898	3.54791	3.53163	4.86365e-07	6.12036e-07
Bv9_211810_xraf	black	42.8556	PREDICTED: transcription factor bHLH87 [Beta vulgaris subsp. vulgaris]	GO:0003677(DNA binding);GO:0003700(DNA binding transcription factor activity);GO:0005515(protein binding);GO:0005634(nucleus);GO:0006351(transcription, DNA-templated);GO:0006355(regulation of transcription, DNA-templated);GO:0046983(protein dimerization activity)	NA	NA	NA	3.71276	5.49687	5.76073	3.31634	2.2495	3.85062	2.37299	2.02929	2.87236	4.90911	3.43052	6.41031	8.51524	9.13241	9.79728	3.29805e-10	4.61741e-10
Bv7_162900_kfsn	black	42.7336	hypothetical protein BVRB_7g162900 [Beta vulgaris subsp. vulgaris]	NA	NA	NA	NA	2.49847	2.18092	2.32162	0.96968	1.10064	1.40745	2.96581	2.46931	2.02577	2.23644	2.08488	2.14223	3.33038	2.88431	3.61311	6.27136e-08	8.13062e-08
Bv6_128050_wyot	black	42.7283	PREDICTED: BTB/POZ domain-containing protein NPY4 [Beta vulgaris subsp. vulgaris]	GO:0005886(plasma membrane);GO:0009416(response to light stimulus);GO:0009958(positive gravitropism);GO:0016567(protein ubiquitination);GO:0071944(cell periphery)	NA	NA	NA	25.1604	25.076	24.9387	12.8237	12.4386	12.0098	14.207	14.1545	13.4376	14.8293	14.8626	14.99	21.3666	20.7181	21.6351	7.26149e-97	4.36817e-96
Bv4_082260_dzqn	black	42.636	PREDICTED: auxin-induced protein AUX28 [Beta vulgaris subsp. vulgaris]	GO:0003700(DNA binding transcription factor activity);GO:0005515(protein binding);GO:0005634(nucleus);GO:0006351(transcription, DNA-templated);GO:0006355(regulation of transcription, DNA-templated);GO:0009733(response to auxin);GO:0009734(auxin-activated signaling pathway)	04075(Plant hormone signal transduction)	K14484	NA	52.3881	51.1767	58.9035	26.0067	25.566	26.7356	44.3608	46.3413	50.0741	46.5966	45.3585	44.3821	54.4823	51.197	54.8045	5.48791e-60	2.20808e-59
Bv5_108230_exsn	black	42.5175	hypothetical protein BVRB_5g108230 [Beta vulgaris subsp. vulgaris]	NA	NA	NA	NA	12.4102	11.847	10.8871	7.59552	6.45329	8.8237	6.94681	4.6311	5.42222	11.3092	8.29552	10.3447	12.6494	14.8525	15.4428	7.70237e-16	1.28762e-15
Bv9_217910_hyyr	black	42.3634	PREDICTED: cytochrome c biogenesis protein CCS1, chloroplastic [Beta vulgaris subsp. vulgaris]	GO:0003674(molecular_function);GO:0009507(chloroplast);GO:0009535(chloroplast thylakoid membrane);GO:0016021(integral component of membrane);GO:0017004(cytochrome complex assembly)	NA	NA	NA	11.7012	12.3286	12.1326	6.03124	5.58622	6.91229	9.16908	10.2756	9.02346	5.46613	7.02808	5.01916	12.7561	10.5281	13.014	1.80586e-16	3.07578e-16
Bv_004000_mpnk	black	42.3556	PREDICTED: protein TIFY 5A [Beta vulgaris subsp. vulgaris]	GO:0003714(transcription corepressor activity);GO:0005634(nucleus);GO:0009611(response to wounding);GO:0031347(regulation of defense response);GO:1903507(negative regulation of nucleic acid-templated transcription);GO:2000022(regulation of jasmonic acid mediated signaling pathway)	NA	NA	NA	0.0461647	0.259183	0.189342	1.42159	1.74758	1.76697	0.0637616	0.153795	0.13949	0.877561	0.57869	0.739688	0.0001	0.0001	0.0001	2.19031e-38	6.16307e-38
Bv6_152050_ccdy	black	42.0765	hypothetical protein BVRB_6g152050 [Beta vulgaris subsp. vulgaris]	NA	NA	NA	NA	21.5975	21.1854	19.568	9.72518	4.15586	8.85767	20.6831	17.5433	17.382	13.2199	9.0975	1.73938	26.8822	30.1306	28.5492	6.67276e-07	8.35151e-07
Bv1_015440_gzer	black	41.988	PREDICTED: protein sym-1 [Beta vulgaris subsp. vulgaris]	GO:0003674(molecular_function);GO:0005739(mitochondrion);GO:0005778(peroxisomal membrane);GO:0008150(biological_process);GO:0016021(integral component of membrane)	04146(Peroxisome)	K13348	NA	1.10436	1.37219	1.43161	0.842115	0.503935	0.38496	0.322519	0.108768	0.357311	0.503601	0.305081	0.346643	1.31452	1.64899	1.74528	2.90429e-12	4.34705e-12
Bv6_137120_aqwu	black	41.9333	hypothetical protein BVRB_6g137120 isoform B [Beta vulgaris subsp. vulgaris];hypothetical protein BVRB_6g137120 isoform A [Beta vulgaris subsp. vulgaris]	GO:0001228(transcriptional activator activity, RNA polymerase II transcription regulatory region sequence-specific DNA binding);GO:0003677(DNA binding);GO:0003700(DNA binding transcription factor activity);GO:0005634(nucleus);GO:0006355(regulation of transcription, DNA-templated);GO:0006355(regulation of transcription, DNA-templated)	NA	NA	NA	0.8417	1.30893	1.30883	0.101544	0.133903	0.2405	0.469951	0.276708	0.232154	0.359458	0.21953	0.31725	1.32696	0.823626	0.960396	1.63429e-12	2.46639e-12
Bv_006270_tfpt	black	41.6696	PREDICTED: probable glycosyltransferase At5g03795 [Beta vulgaris subsp. vulgaris]	GO:0003824(catalytic activity);GO:0005794(Golgi apparatus);GO:0016020(membrane)	NA	NA	NA	56.3684	54.6929	51.1276	83.2084	86.4186	82.6381	37.0889	37.6092	36.1953	53.4664	56.8494	54.7124	16.0761	15.8654	15.7709	0	0
Bv6_140240_xzza	black	41.6084	hypothetical protein BVRB_6g140240 [Beta vulgaris subsp. vulgaris]	NA	NA	NA	NA	0.972195	0.919803	0.901869	0.298146	0.471556	0.511898	0.389438	0.345428	0.365353	1.40596	1.24802	0.982904	1.81222	1.46352	1.90759	4.61368e-34	1.19949e-33
Bv4_092470_rhio	black	41.4001	PREDICTED: uncharacterized protein At5g01610 [Beta vulgaris subsp. vulgaris]	GO:0008150(biological_process);GO:0009507(chloroplast)	NA	NA	NA	7.80217	7.86774	9.2583	26.3613	23.9916	26.3686	16.0134	19.6618	19.334	27.9069	24.4848	26.4923	13.0024	11.6659	12.2429	2.28735e-86	1.2414e-85
Bv6_155630_dgxc	black	40.6258	PREDICTED: probable galacturonosyltransferase-like 3 [Beta vulgaris subsp. vulgaris]	GO:0000271(polysaccharide biosynthetic process);GO:0005794(Golgi apparatus);GO:0016757(transferase activity, transferring glycosyl groups)	NA	NA	NA	1.03624	1.05519	1.28257	0.224274	0.713108	0.513109	0.441781	0.780598	0.808147	0.5583	1.16914	0.835525	1.2921	2.13546	1.88042	9.57379e-05	0.000110787
Bv8_187130_dscz	black	40.1363	PREDICTED: cysteine-rich receptor-like protein kinase 10 [Beta vulgaris subsp. vulgaris]	GO:0004674(protein serine/threonine kinase activity);GO:0005524(ATP binding);GO:0005576(extracellular region);GO:0005886(plasma membrane);GO:0006468(protein phosphorylation);GO:0016021(integral component of membrane);GO:0016301(kinase activity);GO:0042742(defense response to bacterium)	NA	NA	NA	8.20591	7.29058	6.31476	4.41513	4.00911	3.93204	3.27382	3.88741	3.61624	6.29556	4.04264	3.76652	6.49927	9.71394	9.50891	2.56213e-08	3.36563e-08
Bv_014140_kpne	black	39.9029	PREDICTED: salicylic acid-binding protein 2 [Beta vulgaris subsp. vulgaris]	GO:0016787(hydrolase activity)	00460(Cyanoamino acid metabolism)	K20802	EC:4.1.2.10	2.26272	2.15725	2.27904	7.4193	7.59618	7.49304	5.13646	5.08794	5.00552	9.10144	7.54834	8.64336	3.42817	2.61271	3.20089	7.99834e-69	3.60229e-68
Bv2_025620_cwua	black	39.3097	PREDICTED: protein NRT1/ PTR FAMILY 5.6 [Beta vulgaris subsp. vulgaris]	GO:0005215(transporter activity);GO:0005886(plasma membrane);GO:0006857(oligopeptide transport);GO:0016020(membrane)	NA	NA	NA	12.8745	13.3919	12.9969	2.63554	2.35279	2.63193	12.0989	10.2773	11.7447	10.7657	9.27022	8.46353	12.8971	12.6092	11.8821	8.00416e-87	4.3615e-86
Bv2_026400_nhsw	black	39.2297	hypothetical protein SOVF_064640 [Spinacia oleracea]	NA	NA	NA	NA	0.40656	0.273209	0.36206	1.44136	1.34529	1.81403	0.587746	0.899062	0.736004	1.79421	1.71152	1.83369	0.18387	0.255068	0.343867	4.05951e-40	1.18077e-39
Bv5_124960_pdgq	black	39.0075	PREDICTED: junctophilin-2 [Beta vulgaris subsp. vulgaris]	NA	NA	NA	NA	84.944	83.6921	86.8113	40.2052	34.4357	43.0185	32.1379	36.6211	38.9163	36.2255	38.127	36.2554	73.8963	70.7533	69.0143	2.53051e-92	1.45535e-91
Bv5_098750_etcc	black	38.8102	hypothetical protein BVRB_5g098750 [Beta vulgaris subsp. vulgaris]	NA	NA	NA	NA	47.3314	42.1729	43.1373	24.6674	24.5453	23.5645	27.4233	28.7678	28.2839	21.9163	20.1936	20.7045	36.8541	39.6337	38.7366	1.00913e-77	5.00976e-77
Bv9_215590_cekp	black	38.5685	PREDICTED: protein EXORDIUM-like 5 [Beta vulgaris subsp. vulgaris]	GO:0005576(extracellular region);GO:0005615(extracellular space);GO:0006629(lipid metabolic process);GO:0016298(lipase activity);GO:0048046(apoplast)	NA	NA	NA	56.6308	54.3579	61.2497	418.848	442.42	457.445	163.861	207.178	223.558	478.097	482.347	479.115	119.08	117.209	113.95	0	0
Bv9_202590_hass	black	37.8008	PREDICTED: GEM-like protein 4 [Beta vulgaris subsp. vulgaris]	GO:0003674(molecular_function);GO:0005575(cellular_component);GO:0008150(biological_process)	NA	NA	NA	16.7362	15.1543	18.927	8.20465	7.41286	7.09301	5.44457	9.22401	7.06301	4.9476	2.91811	4.39979	18.1339	15.9115	14.6801	2.43242e-33	6.25033e-33
Bv_018800_zfcm	black	37.6136	hypothetical protein BVRB_018800 [Beta vulgaris subsp. vulgaris]	NA	NA	NA	NA	5.76854	5.6894	6.19431	2.30005	1.48321	1.69675	8.81238	6.53002	7.39417	7.27848	5.18382	5.43936	9.14877	10.0828	10.5456	1.56447e-39	4.49266e-39
Bv3_053030_xpsx	black	37.4135	hypothetical protein BVRB_3g053030 [Beta vulgaris subsp. vulgaris]	GO:0004674(protein serine/threonine kinase activity);GO:0005886(plasma membrane);GO:0006468(protein phosphorylation)	04626(Plant-pathogen interaction)	K13466	NA	5.42429	5.49181	5.96336	9.95754	8.56939	9.55996	12.6147	10.0591	13.399	7.49673	13.3037	10.9725	2.41923	1.61455	1.78241	1.57672e-52	5.65255e-52
Bv7_160250_ctdh	black	37.39	PREDICTED: GATA transcription factor 8 [Beta vulgaris subsp. vulgaris]	GO:0000977(RNA polymerase II regulatory region sequence-specific DNA binding);GO:0001085(RNA polymerase II transcription factor binding);GO:0001228(transcriptional activator activity, RNA polymerase II transcription regulatory region sequence-specific DNA binding);GO:0003682(chromatin binding);GO:0005634(nucleus);GO:0005667(transcription factor complex);GO:0030154(cell differentiation)	NA	NA	NA	56.137	54.5867	54.1535	161.606	154.469	160.131	132.245	114.267	126.472	173.933	170.079	177.423	83.3598	85.6417	92.144	6.93877e-169	7.22782e-168
Bv8_194830_zidu	black	36.9769	PREDICTED: uncharacterized protein LOC104902069 [Beta vulgaris subsp. vulgaris]	GO:0003777(microtubule motor activity);GO:0005737(cytoplasm);GO:0005868(cytoplasmic dynein complex);GO:0005875(microtubule associated complex);GO:0007017(microtubule-based process);GO:0030286(dynein complex)	NA	NA	NA	7.14099	6.27987	5.13097	1.91661	3.17557	2.53589	1.45592	4.27913	5.13394	3.632	4.68254	5.59789	8.17841	6.09217	8.4497	0.000472147	0.000533036
Bv2_023780_zeoj	black	36.5421	PREDICTED: protein EARLY FLOWERING 4-like [Beta vulgaris subsp. vulgaris]	GO:0003674(molecular_function);GO:0005634(nucleus);GO:0042753(positive regulation of circadian rhythm);GO:0048511(rhythmic process)	NA	NA	NA	15.6107	14.0459	14.9075	5.25793	5.70564	6.26114	3.24949	3.04754	3.48864	6.40267	6.18394	5.86528	11.8685	12.4295	12.8631	7.80205e-100	4.84539e-99
Bv3_068380_fppt	black	35.8674	PREDICTED: receptor-like cytosolic serine/threonine-protein kinase RBK2 isoform X3 [Beta vulgaris subsp. vulgaris];PREDICTED: receptor-like cytosolic serine/threonine-protein kinase RBK2 isoform X1 [Beta vulgaris subsp. vulgaris];PREDICTED: receptor-like cytosolic serine/threonine-protein kinase RBK2 isoform X2 [Beta vulgaris subsp. vulgaris]	GO:0004674(protein serine/threonine kinase activity);GO:0005524(ATP binding);GO:0005634(nucleus);GO:0005777(peroxisome);GO:0005886(plasma membrane);GO:0016301(kinase activity);GO:0046777(protein autophosphorylation);GO:0046777(protein autophosphorylation)	NA	NA	NA	2.32156	2.49707	0.958346	0.160918	0.284884	0.965611	0.960181	1.56286	1.03912	1.34919	1.86961	1.91253	2.67275	2.50165	2.79722	6.71224e-06	8.11618e-06
Bv3_061120_ofia	black	35.6896	hypothetical protein BVRB_3g061120 [Beta vulgaris subsp. vulgaris]	NA	NA	NA	NA	8.31809	8.32866	8.74629	30.7323	32.0259	30.8375	16.4374	15.4263	13.9297	37.3189	34.0557	32.4326	10.5525	11.4588	10.7974	7.91313e-261	1.3579e-259
Bv_012390_ndmm	black	34.8972	hypothetical protein BVRB_012390 [Beta vulgaris subsp. vulgaris]	NA	NA	NA	NA	3.94775	3.33261	2.26164	0.337915	0.670312	1.14912	0.0691255	0.0001	0.0001	0.263642	0.347738	0.220525	2.81409	2.85592	2.70998	6.02893e-33	1.53464e-32
Bv8_181250_jcna	black	34.8035	hypothetical protein BVRB_8g181250 [Beta vulgaris subsp. vulgaris]	NA	NA	NA	NA	0.752966	1.00601	1.81382	2.53785	2.87919	3.6266	1.92187	3.88296	3.10548	2.82474	2.72786	2.67543	0.734854	1.23223	0.998581	7.96569e-06	9.6061e-06
Bv5_117900_mnku	black	34.7976	hypothetical protein BVRB_5g117900 isoform A [Beta vulgaris subsp. vulgaris];hypothetical protein BVRB_5g117900 isoform B [Beta vulgaris subsp. vulgaris]	NA	NA	NA	NA	3.9679	3.60509	4.1455	6.90427	5.64294	5.28592	5.83654	4.69654	4.24097	6.34138	7.59153	6.98169	2.09509	1.75433	1.75012	1.21852e-22	2.45632e-22
Bv7_168420_mhys	black	34.2932	hypothetical protein BVRB_7g168420 [Beta vulgaris subsp. vulgaris]	NA	03030(DNA replication);03420(Nucleotide excision repair);03430(Mismatch repair);03440(Homologous recombination)	K07466	NA	20.7745	17.4981	24.2143	66.9561	65.7643	59.9093	0.0757806	0.245962	0.0001	37.4127	40.634	36.1471	0.0956139	0.0001	0.0001	0	0
Bv8_202180_fnce	black	34.2695	hypothetical protein BVRB_8g202180 [Beta vulgaris subsp. vulgaris]	NA	NA	NA	NA	9.1825	8.45538	8.19655	5.86173	5.7686	6.18492	6.76833	5.86482	5.10022	4.57522	3.99847	3.75493	8.96327	9.21985	9.02179	1.26198e-10	1.79249e-10
Bv5_098620_wtjx	black	33.0407	PREDICTED: uncharacterized protein At4g10930 [Beta vulgaris subsp. vulgaris];hypothetical protein BVRB_5g098620 isoform B [Beta vulgaris subsp. vulgaris]	GO:0005634(nucleus);GO:0046872(metal ion binding);GO:0046872(metal ion binding)	NA	NA	NA	104.492	104.035	104.604	173.337	172.824	172.329	62.4133	60.4573	59.8435	130.105	146.209	147.078	50.3592	48.9471	48.4732	2.27467e-280	4.29135e-279
Bv7_180700_emck	black	32.6582	hypothetical protein BVRB_7g180700 [Beta vulgaris subsp. vulgaris]	NA	04016(MAPK signaling pathway - plant);04075(Plant hormone signal transduction)	K13422	NA	3.45851	2.57154	3.39229	4.43283	3.64396	5.10959	4.94721	5.92497	4.55195	1.81209	2.87452	1.68613	0.522963	0.557195	0.465902	3.72043e-28	8.57126e-28
Bv8_191960_ehra	black	32.5937	hypothetical protein BVRB_8g191960 [Beta vulgaris subsp. vulgaris]	NA	NA	NA	NA	2.93758	2.8286	1.54573	1.15352	1.05453	1.12753	1.14525	1.31354	1.22106	1.51186	0.482908	1.02466	2.27442	3.57831	2.82879	2.94414e-05	3.47061e-05
Bv6_153540_qoyx	black	32.344	PREDICTED: NAC transcription factor 29 [Beta vulgaris subsp. vulgaris]	GO:0003677(DNA binding);GO:0003700(DNA binding transcription factor activity);GO:0005634(nucleus);GO:0006351(transcription, DNA-templated);GO:0006355(regulation of transcription, DNA-templated);GO:0007275(multicellular organism development);GO:0009793(embryo development ending in seed dormancy);GO:0009825(multidimensional cell growth);GO:0009835(fruit ripening);GO:0009908(flower development);GO:0…	NA	NA	NA	18.5082	16.3829	16.3215	6.87304	5.97501	7.39592	16.919	15.5994	15.7251	6.40953	5.56759	5.72308	16.6223	16.6212	17.0546	2.29705e-98	1.40269e-97
Bv4_083350_jsxg	black	32.027	PREDICTED: phosphoglycerate mutase-like protein AT74 [Beta vulgaris subsp. vulgaris]	GO:0005829(cytosol);GO:0050278(sedoheptulose-bisphosphatase activity)	NA	NA	NA	80.3822	78.1177	80.4174	159.927	154.081	168.051	122.739	124.98	127.972	189.064	188.47	199.382	95.5208	95.1814	101.59	2.00532e-127	1.55788e-126
Bv5_116890_qdme	black	31.9457	PREDICTED: uncharacterized protein LOC104894259 [Beta vulgaris subsp. vulgaris]	GO:0000977(RNA polymerase II regulatory region sequence-specific DNA binding);GO:0003700(DNA binding transcription factor activity);GO:0006357(regulation of transcription by RNA polymerase II);GO:0090575(RNA polymerase II transcription factor complex);GO:0090575(RNA polymerase II transcription factor complex)	NA	NA	NA	2.10302	2.91756	2.89009	16.923	16.4763	16.437	5.77282	6.14466	5.78872	20.7329	19.9295	19.9135	3.89623	3.9497	3.15199	9.17614e-177	1.00551e-175
Bv6_156450_dozk	black	31.6265	uncharacterized protein LOC110785227 [Spinacia oleracea]	NA	NA	NA	NA	5.2217	3.77077	4.38242	1.88488	2.07936	2.51794	5.03353	4.33298	5.0778	4.24993	3.47052	2.61762	6.13363	4.51237	6.4903	1.25992e-08	1.67206e-08
Bv9_213630_fywn	black	31.3542	hypothetical protein BVRB_9g213630 [Beta vulgaris subsp. vulgaris]	NA	NA	NA	NA	14.0525	12.832	13.3424	21.0734	19.5663	16.9073	8.62914	10.2808	9.42725	14.9644	13.3412	16.327	4.70451	4.86182	8.32837	1.28509e-19	2.39256e-19
Bv9_217870_unec	black	31.2663	PREDICTED: UPF0496 protein At4g34320 [Beta vulgaris subsp. vulgaris]	GO:0003674(molecular_function);GO:0016021(integral component of membrane)	NA	NA	NA	6.88574	6.71128	4.95169	14.6731	12.1818	13.387	10.3283	11.2534	11.9009	17.5701	14.4757	12.3907	6.75376	8.80188	6.54274	1.53829e-15	2.54601e-15
Bv5_118900_wfpq	black	31.1765	hypothetical protein BVRB_5g118900 isoform A [Beta vulgaris subsp. vulgaris]	NA	NA	NA	NA	2.03918	2.06409	2.29948	0.772715	1.10084	0.770779	1.41003	1.36782	2.25197	0.761846	1.10672	0.653199	2.2699	1.83347	2.20568	2.37861e-11	3.45716e-11
Bv4_091640_jzzg	black	30.9133	hypothetical protein BVRB_4g091640 [Beta vulgaris subsp. vulgaris]	NA	NA	NA	NA	0.350564	0.253327	0.76843	1.58672	1.24546	1.07678	0.175614	0.41213	0.128558	0.369663	0.636669	0.448198	0.0001	0.0001	0.0001	3.79386e-14	6.01736e-14
Bv_000240_jaqn	black	30.5984	PREDICTED: protein IQ-DOMAIN 14 [Beta vulgaris subsp. vulgaris]	GO:0003674(molecular_function);GO:0005634(nucleus)	NA	NA	NA	3.25139	2.77986	2.48893	0.561102	0.34166	0.797267	3.74681	2.62124	3.35052	1.93839	2.14767	1.81779	3.63653	3.10432	2.78681	2.11185e-15	3.47712e-15
Bv1_002650_nkrz	black	30.4081	PREDICTED: protein yippee-like At4g27745 [Beta vulgaris subsp. vulgaris]	GO:0005634(nucleus);GO:0008150(biological_process);GO:0046872(metal ion binding)	NA	NA	NA	6.76795	7.58729	9.21642	1.00533	1.27684	1.18997	9.66434	8.14256	8.12138	3.80683	3.28792	3.20449	9.07189	6.6749	8.24047	7.66813e-73	3.61036e-72
Bv3_064830_zgod	black	30.1064	hypothetical protein BVRB_3g064840 [Beta vulgaris subsp. vulgaris]	NA	NA	NA	NA	9.71319	11.3061	8.248	8.41959	9.44739	6.12712	7.21311	0.340008	4.26476	10.8426	10.5167	9.54952	18.1243	17.9901	16.9932	0.000474442	0.000535596
Bv5_124850_aamx	black	29.62	PREDICTED: lariat debranching enzyme isoform X1 [Beta vulgaris subsp. vulgaris]	GO:0000398(mRNA splicing, via spliceosome);GO:0005634(nucleus);GO:0008419(RNA lariat debranching enzyme activity);GO:0090502(RNA phosphodiester bond hydrolysis, endonucleolytic)	NA	NA	NA	22.9377	19.898	22.9247	36.8125	36.5079	35.7469	33.5174	33.0146	33.4953	46.0379	43.9842	42.3567	26.2305	26.1825	24.1848	6.65537e-46	2.13365e-45
Bv6_151940_jjng	black	29.536	PREDICTED: putative pentatricopeptide repeat-containing protein At2g01510 [Beta vulgaris subsp. vulgaris]	GO:0005739(mitochondrion);GO:0008150(biological_process);GO:0008270(zinc ion binding);GO:0009451(RNA modification)	NA	NA	NA	1.20143	1.50498	0.930606	0.46234	0.37083	0.741516	0.761547	0.556219	0.886881	0.779455	2.34144	1.22689	1.96218	2.79282	2.82329	1.34018e-06	1.66059e-06
Bv1_003650_fuqn	black	29.481	PREDICTED: GDSL esterase/lipase At4g01130 [Beta vulgaris subsp. vulgaris]	GO:0005576(extracellular region);GO:0016042(lipid catabolic process);GO:0016788(hydrolase activity, acting on ester bonds);GO:0052689(carboxylic ester hydrolase activity)	00511(Other glycan degradation)	K01206	EC:3.2.1.51	0.516009	0.601548	0.518811	1.79021	1.49301	1.35496	0.515404	0.300009	0.529497	1.04945	1.06435	0.810484	0.323676	0.725509	0.432574	1.27678e-07	1.63974e-07
Bv4_091390_swkm	black	28.8946	PREDICTED: uncharacterized protein LOC104907027 [Beta vulgaris subsp. vulgaris]	NA	NA	NA	NA	8.04228	5.13976	9.61349	17.1564	14.1299	11.7399	2.30349	5.44991	4.08174	7.91079	7.56534	8.32944	2.01953	1.61918	1.75714	1.00203e-21	1.97257e-21
Bv9_222980_gskt	black	28.8413	PREDICTED: uncharacterized protein LOC104904869 [Beta vulgaris subsp. vulgaris]	NA	NA	NA	NA	2.53881	1.95257	1.55492	1.19392	0.60431	1.13926	1.87395	0.719795	1.58032	1.42973	1.84113	1.10754	2.12821	2.50967	2.65884	0.0255085	0.0269109
Bv5_123450_jzzi	black	28.0528	PREDICTED: cancer-related nucleoside-triphosphatase homolog [Beta vulgaris subsp. vulgaris]	GO:0005634(nucleus);GO:0098519(nucleotide phosphatase activity, acting on free nucleotides)	00230(Purine metabolism);00730(Thiamine metabolism)	K06928	EC:3.6.1.15	1.09181	2.17761	1.72765	0.796975	0.665423	0.903884	1.51023	1.89005	1.93627	1.32119	1.89167	1.62763	2.05847	2.78112	2.62037	2.20344e-07	2.80702e-07
Bv9_224680_aote	black	27.6082	PREDICTED: hexokinase-1 isoform X1 [Beta vulgaris subsp. vulgaris]	GO:0001678(cellular glucose homeostasis);GO:0004340(glucokinase activity);GO:0005829(cytosol);GO:0006096(glycolytic process);GO:0008865(fructokinase activity);GO:0019158(mannokinase activity)	00010(Glycolysis / Gluconeogenesis);00051(Fructose and mannose metabolism);00052(Galactose metabolism);00500(Starch and sucrose metabolism);00520(Amino sugar and nucleotide sugar metabolism);00524(Neomycin, kanamycin and gentamicin biosynthesis)	K00844	EC:2.7.1.1	69.2437	73.2743	68.1436	33.9909	37.6475	33.3192	79.1587	78.3394	77.1963	53.2214	71.0389	54.1564	66.9219	87.0328	79.9136	9.43118e-22	1.85717e-21
Bv3_048240_kecp	black	26.8957	PREDICTED: pentatricopeptide repeat-containing protein At3g24000, mitochondrial-like [Beta vulgaris subsp. vulgaris]	GO:0005739(mitochondrion);GO:0008270(zinc ion binding)	03440(Homologous recombination)	K10683	NA	6.97393	6.05966	4.35409	16.55	17.5826	17.207	14.7052	16.5736	18.5948	21.1676	23.699	21.9058	9.70149	12.2927	7.98844	3.15797e-32	7.93632e-32
Bv1_005270_xttu	black	26.8568	PREDICTED: GEM-like protein 4 [Beta vulgaris subsp. vulgaris]	GO:0003674(molecular_function);GO:0005575(cellular_component);GO:0008150(biological_process)	04141(Protein processing in endoplasmic reticulum);04120(Ubiquitin mediated proteolysis);03420(Nucleotide excision repair)	K03868	EC:2.3.2.32	1.22886	1.69662	1.69718	0.8148	0.353688	0.495395	0.771997	0.99718	0.469489	0.133662	0.182435	0.306254	1.57442	1.04918	1.46213	3.96419e-08	5.17623e-08
Bv5_113130_dmhc	black	26.4256	PREDICTED: pathogenesis-related protein 5 [Beta vulgaris subsp. vulgaris]	GO:0003674(molecular_function);GO:0005576(extracellular region);GO:0051707(response to other organism)	03440(Homologous recombination)	K12173	NA	0.797706	0.564879	0.813193	1.71314	1.72699	1.94927	1.17631	1.74231	2.04363	2.42943	2.27172	2.89912	0.87177	0.519145	0.72678	1.68956e-12	2.54797e-12
Bv2_036840_iyzq	black	25.3617	PREDICTED: ABC transporter B family member 29, chloroplastic [Beta vulgaris subsp. vulgaris];hypothetical protein BVRB_2g036840 isoform B [Beta vulgaris subsp. vulgaris]	GO:0016021(integral component of membrane);GO:0042626(ATPase activity, coupled to transmembrane movement of substances);GO:0055085(transmembrane transport);GO:0055085(transmembrane transport)	NA	NA	NA	2.68102	2.44851	1.6493	2.2498	1.25427	1.56997	0.734571	0.923896	0.490919	2.57949	2.25266	2.34285	3.19685	3.1031	3.9437	2.33446e-13	3.61267e-13
Bv5_124560_zcqz	black	24.5765	PREDICTED: uncharacterized protein LOC104908028 [Beta vulgaris subsp. vulgaris]	GO:0003674(molecular_function);GO:0008150(biological_process);GO:0016021(integral component of membrane)	NA	NA	NA	0.813883	0.766204	0.8306	0.747818	0.607559	0.67252	0.430369	0.470361	0.289504	1.15736	0.666156	0.630923	1.19629	1.17138	1.30356	8.15653e-06	9.83187e-06
Bv9_207900_oemf	black	23.8028	hypothetical protein BVRB_9g207900 [Beta vulgaris subsp. vulgaris]	NA	NA	NA	NA	1.68394	1.36584	1.28754	1.29907	1.32641	2.72711	2.31364	3.08591	3.39144	2.02055	1.47695	1.7381	0.0001	0.0001	0.0001	6.17861e-21	1.18953e-20
Bv7_176010_ahwr	black	21.1276	hypothetical protein BVRB_7g176020 [Beta vulgaris subsp. vulgaris]	NA	NA	NA	NA	2.08618	2.17174	2.21502	1.04303	0.53589	1.23846	0.709792	1.03144	1.74284	1.52079	3.00642	2.14237	3.95163	2.10233	2.77846	8.61915e-05	9.9959e-05
Bv4_075930_auyq	black	20.9886	PREDICTED: dormancy-associated protein homolog 3 isoform X2 [Beta vulgaris subsp. vulgaris]	GO:0003674(molecular_function);GO:0005634(nucleus)	NA	NA	NA	71.8469	68.9807	73.0348	25.8383	26.1671	20.9172	86.1823	91.7157	88.5692	31.6203	28.2085	25.4596	72.2885	72.014	78.5459	5.5735e-161	5.52374e-160
Bv5_107440_mgrg	black	20.7567	hypothetical protein BVRB_5g107440 isoform B [Beta vulgaris subsp. vulgaris];hypothetical protein BVRB_5g107440 isoform A [Beta vulgaris subsp. vulgaris]	NA	NA	NA	NA	1.66126	1.54092	0.653092	0.548667	0.556235	0.516211	0.614967	0.523858	0.454334	0.50462	0.271693	0.58018	1.36008	1.00095	1.24038	7.33213e-06	8.85163e-06
Bv_008000_efrt	black	19.9894	hypothetical protein BVRB_008000 [Beta vulgaris subsp. vulgaris]	GO:0009506(plasmodesma);GO:0019722(calcium-mediated signaling)	NA	NA	NA	14.9856	15.3112	14.1251	27.1649	29.5485	26.9121	25.3642	20.7609	17.5137	32.5981	38.0845	35.3289	14.5964	18.9761	20.1125	4.11529e-23	8.41005e-23
Bv2_044140_fura	black	19.8312	hypothetical protein BVRB_2g044130 isoform A [Beta vulgaris subsp. vulgaris]	GO:0000963(mitochondrial RNA processing);GO:0003723(RNA binding);GO:0004519(endonuclease activity);GO:0005739(mitochondrion);GO:0008270(zinc ion binding);GO:0009507(chloroplast);GO:0016554(cytidine to uridine editing);GO:0043231(intracellular membrane-bounded organelle);GO:0080156(mitochondrial mRNA modification)	NA	NA	NA	1.92011	1.19681	2.02841	0.366888	0.631215	0.634495	0.705011	0.996443	1.18081	0.570927	2.33584	0.234077	1.96918	2.15358	2.22577	0.00241331	0.00264677
Bv6_139920_hrem	black	17.025	hypothetical protein BVRB_6g139920 [Beta vulgaris subsp. vulgaris]	NA	NA	NA	NA	2.52081	2.00139	1.55637	1.11605	1.09743	0.234217	1.25553	0.77076	1.86516	0.395839	0.884417	0.813019	1.99879	1.51719	1.97572	0.0132227	0.0140969
Bv_014160_qgwm	black	16.1568	PREDICTED: glucan endo-1,3-beta-glucosidase 11 [Beta vulgaris subsp. vulgaris]	GO:0004553(hydrolase activity, hydrolyzing O-glycosyl compounds);GO:0030247(polysaccharide binding);GO:0046658(anchored component of plasma membrane)	00500(Starch and sucrose metabolism)	K19892	EC:3.2.1.39	3.33964	2.92901	3.32664	1.94435	1.17214	1.49247	4.9062	3.98181	4.14117	1.79469	1.88476	1.92372	3.96746	3.5131	3.50053	2.72174e-21	5.2964e-21
Bv6_127980_zhxi	black	16.0646	PREDICTED: scarecrow-like protein 32 [Beta vulgaris subsp. vulgaris]	GO:0003700(DNA binding transcription factor activity);GO:0005634(nucleus);GO:0006355(regulation of transcription, DNA-templated);GO:0043565(sequence-specific DNA binding)	04075(Plant hormone signal transduction)	K14494	NA	0.718371	1.08596	0.512547	0.26156	0.450411	0.56105	0.349999	0.516326	0.158122	1.38275	0.787931	0.772948	1.40295	1.17936	1.02469	9.26152e-05	0.000107251
Bv7_158230_uanf	black	15.8937	PREDICTED: protein SMAX1-LIKE 3 [Beta vulgaris subsp. vulgaris]	GO:0005737(cytoplasm);GO:0006351(transcription, DNA-templated);GO:0006355(regulation of transcription, DNA-templated);GO:0019538(protein metabolic process)	NA	NA	NA	19.197	16.3976	15.9967	14.2232	13.4541	12.1591	16.988	13.8607	16.1482	6.28761	7.28789	7.14781	22.4003	17.6882	21.1069	1.76095e-35	4.70654e-35
Bv2_029830_czex	black	14.8803	hypothetical protein BVRB_2g029830 [Beta vulgaris subsp. vulgaris]	NA	NA	NA	NA	6.58331	5.67155	4.83575	2.06323	2.15133	2.92363	5.31408	6.8414	7.24504	5.96986	2.64518	5.27817	5.31384	8.12448	6.23805	2.39043e-06	2.93643e-06
Bv8_195190_oipq	black	14.5298	hypothetical protein BVRB_8g195190 isoform C [Beta vulgaris subsp. vulgaris];hypothetical protein BVRB_8g195190 isoform A [Beta vulgaris subsp. vulgaris];hypothetical protein BVRB_8g195190 isoform B [Beta vulgaris subsp. vulgaris]	NA	NA	NA	NA	2.74543	1.76678	1.84342	2.12132	1.46474	0.47722	1.35998	0.901222	0.804617	1.74336	2.7403	1.52317	3.5801	2.25757	2.71891	0.0150684	0.0160242
Bv8_186340_kajj	black	13.9235	hypothetical protein BVRB_8g186340 [Beta vulgaris subsp. vulgaris]	NA	NA	NA	NA	1.36585	1.41471	1.23102	1.66899	2.23407	1.57568	1.11891	0.929996	0.948096	1.67327	0.917708	2.06673	0.411142	0.709954	0.849979	0.00280462	0.00306636
Bv_013650_kntk	black	13.5251	PREDICTED: cytochrome P450 71A26-like [Beta vulgaris subsp. vulgaris]	GO:0016020(membrane);GO:0016709(oxidoreductase activity, acting on paired donors, with incorporation or reduction of molecular oxygen, NAD(P)H as one donor, and incorporation of one atom of oxygen);GO:0044550(secondary metabolite biosynthetic process)	NA	NA	NA	3.58503	3.26819	4.28074	1.81022	1.47629	1.75341	5.25163	5.31658	5.20217	2.28146	2.01135	2.36641	3.56366	4.51407	4.28032	2.48743e-24	5.23498e-24
Bv9_223780_mtky	black	10.0128	PREDICTED: UDP-glycosyltransferase 84B2 [Beta vulgaris subsp. vulgaris]	GO:0009813(flavonoid biosynthetic process);GO:0043231(intracellular membrane-bounded organelle);GO:0052696(flavonoid glucuronidation);GO:0080043(quercetin 3-O-glucosyltransferase activity);GO:0080044(quercetin 7-O-glucosyltransferase activity)	NA	NA	NA	1.82502	2.40031	2.17443	0.507015	1.14917	1.51472	2.03179	0.451708	1.1828	0.957086	0.878014	1.51403	1.51491	4.5339	2.27573	0.0288105	0.0303337
Bv8_194270_pgiq	black	5.31256	hypothetical protein BVRB_8g194270 [Beta vulgaris subsp. vulgaris]	NA	NA	NA	NA	4.8549	0.335633	4.66263	0.00656222	0.0001	0.00871298	0.00499009	0.0001	0.00265708	5.96285	5.80538	0.0001	7.85094	8.31839	0.0001	1.74656e-07	2.23324e-07
Bv2_041740_dnmd	blue	696.961	PREDICTED: uncharacterized protein LOC104887544 isoform X1 [Beta vulgaris subsp. vulgaris]	NA	NA	NA	NA	62.7901	62.769	66.8978	40.402	45.1872	40.0953	32.9365	31.6933	35.514	32.4984	32.7665	34.2602	0.709859	0.511499	0.471718	0	0
Bv2_028060_qzcm	blue	693.801	PREDICTED: cytochrome P450 85A [Beta vulgaris subsp. vulgaris]	GO:0004497(monooxygenase activity);GO:0007275(multicellular organism development);GO:0010268(brassinosteroid homeostasis);GO:0016125(sterol metabolic process);GO:0016132(brassinosteroid biosynthetic process)	00905(Brassinosteroid biosynthesis)	K09590	EC:1.14.-.-	11.8392	11.4479	10.3069	30.5905	27.7711	28.3075	33.3434	32.9931	33.9196	40.1256	38.8237	40.3599	68.6765	65.9686	70.1349	0	0
Bv4_083820_kssr	blue	690.261	PREDICTED: flowering-promoting factor 1-like protein 3 [Beta vulgaris subsp. vulgaris]	GO:0003674(molecular_function);GO:0005634(nucleus);GO:0009739(response to gibberellin);GO:0009911(positive regulation of flower development);GO:0010228(vegetative to reproductive phase transition of meristem)	03015(mRNA surveillance pathway)	K14416	NA	13.4364	14.0352	12.9822	29.307	25.6492	25.5647	56.2727	50.7895	49.71	52.4432	46.4286	47.4662	101.613	90.3641	96.8035	0	3e-307
Bv4_095530_ouey	blue	689.859	hypothetical protein BVRB_4g095530 [Beta vulgaris subsp. vulgaris]	NA	NA	NA	NA	26.0583	27.2671	25.544	65.7793	61.2023	67.2015	96.0804	88.5226	90.735	94.2537	74.7845	79.802	166.076	147.877	160.707	3.89917e-209	5.17138e-208
Bv5_098220_jofq	blue	685.093	PREDICTED: protein ODORANT1 [Beta vulgaris subsp. vulgaris]	GO:0000981(RNA polymerase II transcription factor activity, sequence-specific DNA binding);GO:0001135(transcription factor activity, RNA polymerase II transcription factor recruiting);GO:0003677(DNA binding);GO:0003700(DNA binding transcription factor activity);GO:0005634(nucleus);GO:0006355(regulation of transcription, DNA-templated);GO:0006357(regulation of transcription by RNA polymerase II);G…	NA	NA	NA	4.00937	4.26571	2.6996	12.1671	9.85121	11.6102	17.5683	19.1906	19.8681	17.6566	17.0276	15.5253	30.6893	33.7546	30.6029	4.64834e-108	3.09873e-107
Bv4_091360_cztr	blue	684.988	hypothetical protein BVRB_4g091360 [Beta vulgaris subsp. vulgaris]	NA	NA	NA	NA	91.5712	88.9347	82.5258	123.358	120.299	114.814	158.974	167.963	161.315	159.184	166.655	160.1	220.455	231.104	236.41	9.21925e-119	6.72453e-118
Bv8_185500_kafk	blue	683.097	PREDICTED: chromatin remodeling protein EBS [Beta vulgaris subsp. vulgaris]	GO:0000785(chromatin);GO:0000976(transcription regulatory region sequence-specific DNA binding);GO:0003682(chromatin binding);GO:0005677(chromatin silencing complex);GO:0006342(chromatin silencing);GO:0031507(heterochromatin assembly)	NA	NA	NA	140.281	140.436	148.673	187.924	197.944	193.295	203.206	213.418	206.197	230.435	234.594	231.816	324.593	332.9	338.817	3.58657e-100	2.23472e-99
Bv7_161130_nget	blue	682.762	PREDICTED: UDP-glycosyltransferase 73C2 [Beta vulgaris subsp. vulgaris]	GO:0009813(flavonoid biosynthetic process);GO:0043231(intracellular membrane-bounded organelle);GO:0052696(flavonoid glucuronidation);GO:0080043(quercetin 3-O-glucosyltransferase activity);GO:0080044(quercetin 7-O-glucosyltransferase activity)	NA	NA	NA	1.54792	1.80456	1.56106	8.22528	9.4236	9.20811	10.6107	11.0057	10.8158	16.1009	14.3591	13.3073	28.4088	28.4597	27.8384	1.05562e-133	8.62819e-133
Bv1_008680_rczr	blue	682.017	PREDICTED: F-box protein FBW2 [Beta vulgaris subsp. vulgaris]	GO:0004842(ubiquitin-protein transferase activity);GO:0005515(protein binding);GO:0005634(nucleus);GO:0006511(ubiquitin-dependent protein catabolic process);GO:0009737(response to abscisic acid);GO:0010608(posttranscriptional regulation of gene expression);GO:0010629(negative regulation of gene expression);GO:0016567(protein ubiquitination)	NA	NA	NA	111.34	106.194	106.81	136.727	131.872	132.345	193.625	177.688	179.56	168.275	181.708	172.581	254.654	260.991	247.586	7.04537e-101	4.4101e-100
Bv6_149780_ujny	blue	681.38	PREDICTED: protein NEOXANTHIN-DEFICIENT 1 isoform X1 [Beta vulgaris subsp. vulgaris]	GO:0003674(molecular_function);GO:0005634(nucleus);GO:0016123(xanthophyll biosynthetic process)	NA	NA	NA	6.47484	5.50941	5.50693	32.9584	33.4974	31.0664	44.6755	35.0039	37.2489	39.7469	42.7493	39.1108	75.5308	76.2352	81.1707	0	0
Bv4_077450_puxj	blue	679.312	hypothetical protein [Beta vulgaris subsp. vulgaris]	NA	NA	NA	NA	2.29619	3.19761	1.77194	9.76404	11.9017	7.0941	26.4882	32.3583	31.4891	31.0782	28.7401	26.8962	65.2115	61.264	64.1709	1.34254e-166	1.38103e-165
Bv7_161250_feki	blue	677.685	PREDICTED: protein DMR6-LIKE OXYGENASE 1 [Beta vulgaris subsp. vulgaris]	GO:0051213(dioxygenase activity)	00940(Phenylpropanoid biosynthesis)	K06892	EC:1.14.11.-	350.075	315.07	301.914	645.698	637.622	649.792	1407.31	1371.07	1349.02	1039	1072.97	1088.12	2197.3	2176.97	2239.37	0	0
Bv8_182650_atzf	blue	676.452	PREDICTED: MACPF domain-containing protein NSL1 isoform X1 [Beta vulgaris subsp. vulgaris]	GO:0003674(molecular_function);GO:0005634(nucleus);GO:0005886(plasma membrane);GO:0006955(immune response);GO:0008219(cell death);GO:0009626(plant-type hypersensitive response);GO:0009651(response to salt stress);GO:0010337(regulation of salicylic acid metabolic process);GO:0052542(defense response by callose deposition)	00520(Amino sugar and nucleotide sugar metabolism)	K01183	EC:3.2.1.14	1250.27	1219.85	1207.93	1024.23	972.448	947.023	834.659	843.578	822.659	861.448	883.108	882.065	560.002	552.167	570.716	1.17102e-72	5.50391e-72
Bv4_095690_giwn	blue	674.674	PREDICTED: uncharacterized protein LOC104907546 [Beta vulgaris subsp. vulgaris]	GO:0003674(molecular_function);GO:0005739(mitochondrion);GO:0009061(anaerobic respiration)	NA	NA	NA	0.681381	2.66332	1.21954	84.717	85.967	92.6877	127.311	167.306	166.218	126.698	103.206	109.928	361.199	360.776	370.564	5.54504e-246	8.92614e-245
Bv5_114610_ixzi	blue	673.026	PREDICTED: uncharacterized protein LOC104894038 [Beta vulgaris subsp. vulgaris]	GO:0003676(nucleic acid binding);GO:0004519(endonuclease activity);GO:0005634(nucleus)	NA	NA	NA	7.57868	9.03212	8.14797	10.7057	10.7408	11.8726	15.2554	14.2704	15.2922	14.1199	13.877	12.8358	22.1182	22.2276	20.5095	5.20337e-47	1.69915e-46
Bv7_167130_kugn	blue	672.113	hypothetical protein BVRB_7g167130 [Beta vulgaris subsp. vulgaris]	GO:0004601(peroxidase activity);GO:0009505(plant-type cell wall);GO:0009664(plant-type cell wall organization)	00940(Phenylpropanoid biosynthesis)	K00430	EC:1.11.1.7	0.63622	0.460127	0.423311	1.87198	1.71045	2.18752	3.89133	4.00343	3.48166	4.87312	5.15104	4.93022	8.41261	9.26636	8.90563	9.02789e-80	4.58252e-79
Bv8_198270_jpdu	blue	666.768	PREDICTED: uncharacterized protein LOC104902380 isoform X1 [Beta vulgaris subsp. vulgaris]	GO:0005634(nucleus);GO:0006364(rRNA processing);GO:0030687(preribosome, large subunit precursor);GO:0030687(preribosome, large subunit precursor)	NA	NA	NA	6.12204	5.324	5.82699	11.6256	10.3064	9.80494	12.5897	13.8935	11.8989	11.1915	11.5467	10.9178	21.3056	21.1345	20.0925	4.57323e-44	1.42055e-43
Bv5_124900_ghuu	blue	666.415	PREDICTED: probable receptor-like protein kinase At5g47070 [Beta vulgaris subsp. vulgaris]	GO:0004675(transmembrane receptor protein serine/threonine kinase activity);GO:0005524(ATP binding);GO:0005886(plasma membrane);GO:0006952(defense response);GO:0016301(kinase activity)	NA	NA	NA	180.089	177.545	179.917	165.615	166.654	173.606	132.446	121.103	133.845	134.153	130.225	135.593	73.6627	67.4696	69.241	1.56313e-133	1.27653e-132
Bv6_134790_gdyx	blue	666.056	PREDICTED: uncharacterized protein LOC104895644 [Beta vulgaris subsp. vulgaris]	GO:0003824(catalytic activity)	NA	NA	NA	130.201	125.707	124.064	87.9373	85.0624	87.1985	84.3157	76.9732	78.007	82.1145	87.3769	87.6451	32.9827	31.5614	32.899	1.64448e-174	1.76531e-173
Bv3_064330_gria	blue	663.007	PREDICTED: pentatricopeptide repeat-containing protein At1g05600 [Beta vulgaris subsp. vulgaris]	GO:0003723(RNA binding);GO:0004519(endonuclease activity);GO:0005739(mitochondrion);GO:0009451(RNA modification);GO:0043231(intracellular membrane-bounded organelle)	NA	NA	NA	0.588053	0.544863	0.718102	1.34573	1.31786	1.06065	1.36291	1.59534	1.55785	1.38657	1.38562	1.46681	2.75104	2.54589	2.46742	1.43085e-25	3.10107e-25
Bv3_060680_rhzp	blue	660.784	PREDICTED: FT-interacting protein 1 [Beta vulgaris subsp. vulgaris]	GO:0005509(calcium ion binding);GO:0005544(calcium-dependent phospholipid binding);GO:0005886(plasma membrane)	00270(Cysteine and methionine metabolism);00450(Selenocompound metabolism)	K00549	EC:2.1.1.14	13.1053	13.3596	13.1218	19.4314	23.301	21.3274	26.8117	29.1135	27.635	29.2158	31.4129	30.4393	42.9627	49.8114	44.2702	3.71956e-99	2.28903e-98
Bv6_133810_xukd	blue	658.64	PREDICTED: nucleobase-ascorbate transporter 11 isoform X1 [Beta vulgaris subsp. vulgaris]	GO:0005886(plasma membrane);GO:0016020(membrane);GO:0016021(integral component of membrane);GO:0022857(transmembrane transporter activity);GO:0055085(transmembrane transport)	NA	NA	NA	7.30562	7.16377	6.37368	7.61327	7.75794	8.00612	12.4724	13.1168	12.7812	14.0793	13.6942	12.7162	24.3872	24.1718	23.8567	1.70211e-154	1.60959e-153
Bv4_093200_hwsr	blue	658.064	PREDICTED: beta-glucuronosyltransferase GlcAT14A [Beta vulgaris subsp. vulgaris]	GO:0005794(Golgi apparatus);GO:0008375(acetylglucosaminyltransferase activity);GO:0009567(double fertilization forming a zygote and endosperm);GO:0016020(membrane);GO:0016051(carbohydrate biosynthetic process);GO:0016757(transferase activity, transferring glycosyl groups);GO:0048868(pollen tube development);GO:0048868(pollen tube development)	NA	NA	NA	1.58947	2.0357	2.43302	5.43909	4.49621	4.73924	9.05165	9.01794	10.6015	8.83094	7.43139	8.30958	14.7304	14.0754	13.912	7.0788e-100	4.3991e-99
Bv5_100020_upzj	blue	654.39	PREDICTED: probable polygalacturonase [Beta vulgaris subsp. vulgaris]	GO:0004650(polygalacturonase activity);GO:0005975(carbohydrate metabolic process)	00040(Pentose and glucuronate interconversions)	K01184	EC:3.2.1.15	7.92708	6.8198	8.05167	12.2029	12.6734	12.39	24.1814	25.3199	25.0831	26.6556	25.8742	27.6691	39.4122	39.0539	42.5538	2.12389e-278	3.97919e-277
Bv7_160710_asgy	blue	652.905	PREDICTED: F-box protein PP2-A15 [Beta vulgaris subsp. vulgaris]	GO:0005634(nucleus);GO:0030246(carbohydrate binding)	NA	NA	NA	62.2036	66.2918	67.1541	139.252	145.866	139.855	219.061	220.966	216.068	182.407	159.418	165.084	304.379	289.213	322.173	2.88625e-240	4.5122e-239
Bv6_152390_msrc	blue	652.276	PREDICTED: cold and drought-regulated protein CORA [Beta vulgaris subsp. vulgaris]	NA	NA	NA	NA	626.455	590.519	613.868	1902.28	1933.1	1883.4	3502.83	3703.04	3820.23	2590.36	2434.28	2356.67	5434.03	5402.36	5586.15	8.67511e-253	1.43544e-251
Bv3_064110_shhh	blue	650.605	PREDICTED: probable protein S-acyltransferase 4 [Beta vulgaris subsp. vulgaris]	GO:0005634(nucleus);GO:0005886(plasma membrane);GO:0016021(integral component of membrane);GO:0019706(protein-cysteine S-palmitoyltransferase activity);GO:0030140(trans-Golgi network transport vesicle);GO:0035618(root hair);GO:0048767(root hair elongation)	NA	NA	NA	44.6454	44.338	42.3466	39.0599	37.5616	39.9939	34.5279	31.4899	32.7644	31.8128	28.9698	32.1938	21.0473	20.9665	22.1319	8.90726e-62	3.67103e-61
Bv6_141100_yout	blue	650.414	PREDICTED: phosphoenolpyruvate carboxylase 4 [Beta vulgaris subsp. vulgaris]	GO:0005829(cytosol);GO:0008964(phosphoenolpyruvate carboxylase activity)	00620(Pyruvate metabolism);00710(Carbon fixation in photosynthetic organisms)	K01595	EC:4.1.1.31	2.52782	0.466918	1.22817	4.89571	4.08493	5.33419	10.008	9.2268	11.6687	15.0535	11.2199	12.477	22.9435	23.1571	26.2566	1.21711e-40	3.5686e-40
Bv3_069620_wune	blue	648.834	PREDICTED: haloacid dehalogenase-like hydrolase domain-containing protein At2g33255 [Beta vulgaris subsp. vulgaris]	GO:0016311(dephosphorylation);GO:0016791(phosphatase activity)	NA	NA	NA	1.9447	1.67338	1.96225	2.69528	2.59021	2.5821	3.21543	3.00812	2.91734	3.44156	2.96706	3.35278	4.25834	4.20374	4.3211	3.18266e-33	8.15934e-33
Bv8_196480_thcc	blue	646.21	PREDICTED: subtilisin-like protease SBT6.1 isoform X1 [Beta vulgaris subsp. vulgaris]	GO:0004252(serine-type endopeptidase activity);GO:0005618(cell wall)	04141(Protein processing in endoplasmic reticulum)	K08653	EC:3.4.21.112	83.7279	85.5297	84.8895	114.122	110.26	105.113	120.62	108.271	114.352	114.993	110.539	117.331	185.427	183.35	176.531	8.76734e-78	4.35704e-77
Bv7_173910_jprc	blue	646.152	PREDICTED: protein TRM32 [Beta vulgaris subsp. vulgaris]	GO:0005634(nucleus)	NA	NA	NA	212.05	199.566	206.138	183.116	177.435	176.697	183.618	168.421	162.235	154.913	162.307	168.545	88.8131	88.7544	90.3338	7.25238e-82	3.75458e-81
Bv4_091130_ekaa	blue	644.992	hypothetical protein BVRB_4g091130 [Beta vulgaris subsp. vulgaris]	GO:0006457(protein folding);GO:0009507(chloroplast)	00240(Pyrimidine metabolism);00250(Alanine, aspartate and glutamate metabolism)	K01956	EC:6.3.5.5	5.46169	4.64848	4.73967	27.5804	23.5532	26.7697	32.0814	31.4144	30.5437	28.3093	29.3742	27.6377	93.1137	92.0708	98.7877	0	0
Bv9_208660_grmo	blue	644.763	PREDICTED: uncharacterized protein LOC104903357 [Beta vulgaris subsp. vulgaris]	GO:0003674(molecular_function);GO:0005634(nucleus);GO:0008150(biological_process)	NA	NA	NA	177.158	173.742	176.484	322.506	319.804	313.727	314.416	303.909	306.92	297.485	320.422	309.273	495.02	483.529	498.999	6.20005e-169	6.46188e-168
Bv2_024250_tjuw	blue	644.486	PREDICTED: coronatine-insensitive protein 1 [Beta vulgaris subsp. vulgaris]	GO:0004842(ubiquitin-protein transferase activity);GO:0005515(protein binding);GO:0005634(nucleus);GO:0006511(ubiquitin-dependent protein catabolic process);GO:0006952(defense response);GO:0009611(response to wounding);GO:0009625(response to insect);GO:0009641(shade avoidance);GO:0009753(response to jasmonic acid);GO:0009861(jasmonic acid and ethylene-dependent systemic resistance);GO:0009867(jas…	04075(Plant hormone signal transduction)	K13463	NA	4.637	4.1748	4.81072	5.72358	5.4568	5.72614	10.3171	10.4335	9.71434	9.36492	8.83284	9.7522	14.4665	13.6039	14.7741	2.54193e-111	1.74921e-110
Bv5_125710_fatq	blue	643.701	hypothetical protein D0Y65_024772, partial [Glycine soja]	GO:0005739(mitochondrion);GO:0008150(biological_process)	NA	NA	NA	63.2561	60.2554	64.8273	71.5863	67.9155	72.9827	99.4766	95.4577	100.828	92.0868	81.0408	90.6228	150.088	140.517	150.94	1.81604e-110	1.23891e-109
Bv9_208590_puum	blue	643.31	PREDICTED: ethylene-responsive transcription factor ERF054 [Beta vulgaris subsp. vulgaris]	GO:0003677(DNA binding);GO:0003700(DNA binding transcription factor activity);GO:0005515(protein binding);GO:0005634(nucleus);GO:0005737(cytoplasm);GO:0006351(transcription, DNA-templated);GO:0006355(regulation of transcription, DNA-templated);GO:0009651(response to salt stress);GO:0009873(ethylene-activated signaling pathway);GO:0043565(sequence-specific DNA binding);GO:0045893(positive regulati…	NA	NA	NA	38.9902	32.7801	36.6579	62.8496	58.4333	59.3876	77.7707	66.2075	76.3998	77.3273	72.8303	79.7622	183.912	162.231	177.392	4.45528e-203	5.72878e-202
Bv8_195430_rtxi	blue	641.964	PREDICTED: protein argonaute PNH1 [Beta vulgaris subsp. vulgaris]	GO:0003743(translation initiation factor activity);GO:0005737(cytoplasm);GO:0019827(stem cell population maintenance);GO:0048366(leaf development)	NA	NA	NA	69.2798	69.0126	71.5518	92.9396	91.7063	86.8344	98.3717	106.574	92.9633	115.905	123.52	124.2	188.117	190.389	181.326	3.39286e-129	2.6797e-128
Bv9_202270_kwgu	blue	641.829	PREDICTED: transcription elongation factor SPT4 homolog 2 [Beta vulgaris subsp. vulgaris]	GO:0000993(RNA polymerase II core binding);GO:0003700(DNA binding transcription factor activity);GO:0003727(single-stranded RNA binding);GO:0005634(nucleus);GO:0006325(chromatin organization);GO:0006351(transcription, DNA-templated);GO:0006397(mRNA processing);GO:0008270(zinc ion binding);GO:0032044(DSIF complex);GO:0032786(positive regulation of DNA-templated transcription, elongation);GO:003424…	NA	NA	NA	29.3285	27.2769	25.4904	42.4718	41.0467	44.1753	48.1708	45.6503	45.4204	53.0362	46.696	50.7978	65.2824	68.3171	65.136	1.9266e-61	7.89058e-61
Bv6_136570_ussu	blue	641.448	PREDICTED: ureide permease 1 isoform X1 [Beta vulgaris subsp. vulgaris];PREDICTED: ureide permease 2 isoform X2 [Beta vulgaris subsp. vulgaris]	GO:0005274(allantoin:proton symporter activity);GO:0005524(ATP binding);GO:0005886(plasma membrane);GO:0015210(uracil transmembrane transporter activity);GO:0015505(uracil:cation symporter activity);GO:0015720(allantoin transport);GO:0015857(uracil transport);GO:0016021(integral component of membrane);GO:0022857(transmembrane transporter activity);GO:0043100(pyrimidine nucleobase salvage);GO:0071…	NA	NA	NA	2.02745	1.68366	1.44106	3.30182	3.55281	3.24679	4.09161	3.90821	4.80132	5.10315	5.91328	5.34447	7.83829	8.31409	8.71798	1.4761e-68	6.62603e-68
Bv1_003760_tkgz	blue	641.267	PREDICTED: F-box/kelch-repeat protein At3g61590 [Beta vulgaris subsp. vulgaris]	GO:0004842(ubiquitin-protein transferase activity);GO:0019005(SCF ubiquitin ligase complex);GO:0031146(SCF-dependent proteasomal ubiquitin-dependent protein catabolic process)	NA	NA	NA	4.78925	4.61558	5.02795	22.2985	20.7707	23.1822	24.7563	21.7008	24.1371	20.3602	18.6828	21.702	41.6129	42.7547	42.3515	2.86934e-240	4.48946e-239
Bv5_103030_anmg	blue	640.546	PREDICTED: protein SODIUM POTASSIUM ROOT DEFECTIVE 1-like [Beta vulgaris subsp. vulgaris]	GO:0005737(cytoplasm);GO:0030001(metal ion transport);GO:0046914(transition metal ion binding);GO:0046916(cellular transition metal ion homeostasis)	03013(RNA transport)	K14292	EC:2.1.1.-	2.87126	2.87165	3.00603	13.1704	10.9322	11.694	12.5752	13.2452	14.7732	11.1347	10.1188	11.3881	26.4483	24.6061	28.1239	3.02613e-280	5.70337e-279
Bv6_135390_gwrr	blue	640.378	PREDICTED: ethylene-responsive transcription factor RAP2-4 [Beta vulgaris subsp. vulgaris]	GO:0003677(DNA binding);GO:0003700(DNA binding transcription factor activity);GO:0005634(nucleus);GO:0006351(transcription, DNA-templated);GO:0006355(regulation of transcription, DNA-templated);GO:0009873(ethylene-activated signaling pathway)	NA	NA	NA	2.83941	2.96546	2.65312	7.7863	6.7302	8.31041	10.8487	10.7892	9.93263	8.9826	8.84418	10.3267	29.7685	25.7728	28.6269	2.55563e-211	3.4278e-210
Bv6_132540_inaz	blue	638.421	PREDICTED: 5' exonuclease Apollo isoform X1 [Beta vulgaris subsp. vulgaris]	GO:0000784(nuclear chromosome, telomeric region);GO:0003684(damaged DNA binding);GO:0006303(double-strand break repair via nonhomologous end joining);GO:0031848(protection from non-homologous end joining at telomere);GO:0035312(5'-3' exodeoxyribonuclease activity);GO:0036297(interstrand cross-link repair)	NA	NA	NA	2.52291	2.08858	2.53425	3.50529	3.41151	3.60403	3.82057	4.05585	3.66633	5.17485	4.25144	5.05532	8.635	8.22379	8.4931	5.70988e-54	2.0864e-53
Bv5_113650_itye	blue	637.32	hypothetical protein BVRB_5g113650 [Beta vulgaris subsp. vulgaris]	NA	NA	NA	NA	6.71107	5.63488	6.12229	20.2069	21.3241	20.3471	23.1404	30.0775	26.059	39.3931	34.2817	37.2197	64.8784	61.0325	54.118	7.56896e-118	5.47243e-117
Bv1_006830_unuu	blue	637.259	PREDICTED: uncharacterized protein LOC104889342 [Beta vulgaris subsp. vulgaris]	GO:0003674(molecular_function);GO:0005634(nucleus);GO:0009061(anaerobic respiration)	NA	NA	NA	52.5012	50.4278	50.3435	242.223	215.029	224.235	246.936	231.276	225.712	191.635	186.211	191.234	553.886	530.199	533.001	0	0
Bv4_093550_ytci	blue	636.702	PREDICTED: mediator of RNA polymerase II transcription subunit 8 [Beta vulgaris subsp. vulgaris]	GO:0005634(nucleus);GO:0006351(transcription, DNA-templated);GO:0006355(regulation of transcription, DNA-templated);GO:0009909(regulation of flower development);GO:0016592(mediator complex);GO:0050832(defense response to fungus)	NA	NA	NA	117.914	115.593	108.325	148.285	143.242	142.863	166.956	155.422	145.176	172.571	195.711	185.796	265.442	274.461	271.385	3.51953e-84	1.86376e-83
Bv6_138210_ekhm	blue	633.804	PREDICTED: uncharacterized protein LOC104895991 [Beta vulgaris subsp. vulgaris]	GO:0003674(molecular_function);GO:0005575(cellular_component)	NA	NA	NA	43.0201	42.1282	40.478	53.6466	53.3394	58.4269	92.5648	85.4604	100.249	83.0169	77.9237	82.4568	121.713	118.952	123.028	4.19181e-133	3.4115e-132
Bv3_054140_qmum	blue	633.659	PREDICTED: probable N-acetyltransferase HLS1-like isoform X1 [Beta vulgaris subsp. vulgaris]	GO:0004596(peptide alpha-N-acetyltransferase activity);GO:0006474(N-terminal protein amino acid acetylation);GO:0031248(protein acetyltransferase complex)	NA	NA	NA	2.08451	1.75044	2.13361	3.12844	2.8647	1.82385	4.75116	4.84769	4.01015	4.8177	5.36201	4.35069	8.16505	8.24011	8.22641	1.9499e-29	4.61665e-29
Bv7_160700_mwox	blue	633.214	PREDICTED: AF4/FMR2 family member 4 [Beta vulgaris subsp. vulgaris]	GO:0003700(DNA binding transcription factor activity);GO:0005515(protein binding);GO:0005634(nucleus);GO:0005886(plasma membrane);GO:0006355(regulation of transcription, DNA-templated);GO:0010629(negative regulation of gene expression);GO:1900037(regulation of cellular response to hypoxia)	NA	NA	NA	3.49606	1.64479	3.13018	62.7843	55.5356	65.6708	180.132	197.977	228.014	135.414	124.722	139.332	576.271	535.287	598.395	0	0
Bv7_167240_pyex	blue	631.999	PREDICTED: alcohol dehydrogenase 3 [Beta vulgaris subsp. vulgaris]	GO:0000166(nucleotide binding);GO:0001666(response to hypoxia);GO:0004022(alcohol dehydrogenase (NAD) activity);GO:0005737(cytoplasm);GO:0005794(Golgi apparatus);GO:0005829(cytosol);GO:0005886(plasma membrane);GO:0006970(response to osmotic stress);GO:0008270(zinc ion binding);GO:0009409(response to cold);GO:0009413(response to flooding);GO:0009414(response to water deprivation);GO:0009651(respon…	00010(Glycolysis / Gluconeogenesis);00071(Fatty acid degradation);00592(alpha-Linolenic acid metabolism);00350(Tyrosine metabolism)	K18857	EC:1.1.1.1	0.472998	0.885089	0.512118	1.27315	0.829653	1.23061	4.1274	3.74974	3.19704	3.77303	2.88354	3.10915	6.38911	7.32367	6.90335	3.38598e-37	9.32422e-37
Bv7_177560_okyd	blue	631.58	PREDICTED: kelch repeat-containing protein At3g27220 [Beta vulgaris subsp. vulgaris]	GO:0005768(endosome);GO:0005794(Golgi apparatus);GO:0005802(trans-Golgi network);GO:0005886(plasma membrane);GO:0008150(biological_process)	NA	NA	NA	30.4811	25.6101	31.0625	619.017	626.035	628.124	619.116	620.004	640.013	550.082	550.04	557.881	1194.03	1212.9	1215.56	0	0
Bv1_004220_agum	blue	630.894	PREDICTED: probable receptor-like protein kinase At5g24010 [Beta vulgaris subsp. vulgaris]	GO:0005634(nucleus);GO:0005783(endoplasmic reticulum);GO:0016021(integral component of membrane);GO:0016301(kinase activity);GO:0016310(phosphorylation);GO:0016757(transferase activity, transferring glycosyl groups)	NA	NA	NA	273.568	267.568	287.104	227.223	227.074	222.02	175.925	180.829	185.637	218.088	213.097	219.771	133.533	128.009	130.701	6.27562e-82	3.25068e-81
Bv7_180150_wfno	blue	630.888	PREDICTED: uncharacterized protein LOC109133610 [Beta vulgaris subsp. vulgaris]	NA	NA	NA	NA	1.73569	1.83663	1.24439	5.40599	6.47611	5.7768	6.22686	6.88009	4.41896	8.10079	7.90909	8.83646	19.1182	18.5185	20.0894	8.27219e-78	4.11312e-77
Bv6_149930_qmfq	blue	630.236	PREDICTED: shikimate kinase, chloroplastic [Beta vulgaris subsp. vulgaris]	GO:0000287(magnesium ion binding);GO:0004765(shikimate kinase activity);GO:0009073(aromatic amino acid family biosynthetic process);GO:0019632(shikimate metabolic process)	00400(Phenylalanine, tyrosine and tryptophan biosynthesis)	K00891	EC:2.7.1.71	429.346	430.151	484.791	382.358	389.715	384.6	259.793	279.362	275.83	283.094	270.261	273.785	161.282	166.022	161.304	1.24583e-139	1.06172e-138
Bv5_100210_gzks	blue	629.622	PREDICTED: BTB/POZ domain-containing protein At1g63850 [Beta vulgaris subsp. vulgaris]	GO:0005634(nucleus);GO:0016567(protein ubiquitination)	NA	NA	NA	5.01731	5.00688	5.10366	6.23409	6.15163	7.28886	9.22077	9.56088	9.50385	9.64151	9.47631	9.73044	13.0478	12.181	12.0317	1.25559e-43	3.8792e-43
Bv5_107540_kkpf	blue	628.598	hypothetical protein BVRB_5g107540 [Beta vulgaris subsp. vulgaris]	NA	NA	NA	NA	0.190975	0.0872862	0.284737	1.06759	0.769201	0.924542	3.46799	3.19937	3.92512	2.60772	2.05188	2.27149	6.62079	6.47598	5.60613	8.06059e-132	6.49053e-131
Bv4_085650_copm	blue	628.382	PREDICTED: pathogen-related protein [Beta vulgaris subsp. vulgaris]	GO:0003674(molecular_function);GO:0005737(cytoplasm);GO:0008150(biological_process)	NA	NA	NA	20.8322	22.3357	19.9928	35.4724	39.053	41.0604	45.1696	51.3346	47.9417	47.7751	43.4371	44.3597	62.8356	65.6799	62.9014	4.5991e-101	2.88264e-100
Bv8_193970_okwz	blue	627.912	PREDICTED: actin-related protein 6 [Beta vulgaris subsp. vulgaris]	GO:0005200(structural constituent of cytoskeleton);GO:0005515(protein binding);GO:0005634(nucleus);GO:0005737(cytoplasm);GO:0006338(chromatin remodeling);GO:0006355(regulation of transcription, DNA-templated);GO:0006952(defense response);GO:0006970(response to osmotic stress);GO:0008283(cell proliferation);GO:0009266(response to temperature stimulus);GO:0009845(seed germination);GO:0009910(negati…	NA	NA	NA	28.7127	23.5593	27.4393	36.5328	31.1037	35.554	50.2066	58.8823	53.7206	53.59	50.6341	58.3655	74.3381	77.5053	76.9574	5.51328e-52	1.9529e-51
Bv5_108900_dofo	blue	626.541	PREDICTED: iron-sulfur cluster co-chaperone protein HscB, mitochondrial [Beta vulgaris subsp. vulgaris]	GO:0005739(mitochondrion);GO:0016226(iron-sulfur cluster assembly);GO:0051087(chaperone binding)	NA	NA	NA	10.4407	10.7314	11.2285	16.6824	14.772	14.3584	18.0919	17.9202	18.7204	17.8604	18.1006	17.489	23.3355	21.6879	22.91	1.69082e-40	4.94683e-40
Bv_007570_mdhp	blue	626.227	PREDICTED: interactor of constitutive active ROPs 2, chloroplastic isoform X1 [Beta vulgaris subsp. vulgaris]	GO:0051219(phosphoprotein binding)	NA	NA	NA	28.5254	30.1545	29.1038	48.8491	45.4822	43.3391	41.8691	51.2948	47.6419	56.721	62.389	60.4736	91.5919	87.079	86.3096	1.73324e-99	1.0715e-98
Bv6_133000_prfo	blue	626.085	PREDICTED: uncharacterized protein LOC104895442 [Beta vulgaris subsp. vulgaris]	GO:0003674(molecular_function);GO:0005634(nucleus);GO:0008150(biological_process)	NA	NA	NA	0.211391	0.282015	0.23087	4.559	3.66966	4.44371	5.21214	4.82259	5.19894	3.6764	2.9428	3.34722	13.8905	12.7324	12.9287	0	0
Bv6_146370_qxed	blue	625.471	PREDICTED: OTU domain-containing protein DDB_G0284757 [Beta vulgaris subsp. vulgaris]	GO:0005634(nucleus);GO:0006508(proteolysis);GO:0008234(cysteine-type peptidase activity)	NA	NA	NA	62.0346	62.5711	60.6348	54.3681	51.7755	51.8369	38.4184	41.12	38.0258	50.5442	50.0716	50.7582	23.8103	23.1733	22.1364	5.2149e-136	4.32577e-135
Bv5_107860_fnkj	blue	624.692	hypothetical protein BVRB_5g107860 [Beta vulgaris subsp. vulgaris]	NA	NA	NA	NA	2.30043	2.07764	1.74582	4.72699	5.15428	4.30269	9.97645	8.63976	9.00443	6.17674	5.9127	6.28775	14.5633	12.5309	13.6336	1.31754e-136	1.09722e-135
Bv3_070060_sozo	blue	623.646	PREDICTED: leucine-rich repeat extensin-like protein 6 [Beta vulgaris subsp. vulgaris]	GO:0005199(structural constituent of cell wall);GO:0005576(extracellular region);GO:0005618(cell wall);GO:0009506(plasmodesma);GO:0071555(cell wall organization)	NA	NA	NA	629.415	585.865	624.672	425.416	419.234	441.344	405.75	417.355	438.088	332.1	336.684	347.796	171.581	164.719	173.451	3.71037e-163	3.71801e-162
Bv6_151620_dnhd	blue	623.483	hypothetical protein BVRB_6g151620 isoform A [Beta vulgaris subsp. vulgaris];PREDICTED: probable thimet oligopeptidase isoform X1 [Beta vulgaris subsp. vulgaris]	GO:0004222(metalloendopeptidase activity);GO:0006518(peptide metabolic process);GO:0006518(peptide metabolic process)	NA	NA	NA	12.0592	11.3493	12.7788	19.4132	18.1508	18.05	17.4898	18.6758	17.6327	19.5352	18.1181	18.8835	26.6998	26.0884	25.7199	2.53869e-34	6.6293e-34
Bv2_028620_hggu	blue	622.881	hypothetical protein BVRB_2g028620 [Beta vulgaris subsp. vulgaris]	NA	NA	NA	NA	2.26245	1.81355	2.66884	6.42174	7.00741	8.62012	11.6724	11.4208	12.864	8.24558	7.24911	6.42495	27.1154	25.6179	26.5038	3.50746e-128	2.73717e-127
Bv2_037960_nowd	blue	621.651	PREDICTED: uncharacterized protein At3g27210 [Beta vulgaris subsp. vulgaris]	GO:0003674(molecular_function);GO:0005634(nucleus);GO:0008150(biological_process);GO:0016021(integral component of membrane)	NA	NA	NA	80.4594	77.4269	79.6465	57.7231	58.2107	58.061	51.9417	47.5218	48.6757	62.2843	63.1212	62.6871	24.1943	24.5357	22.6187	7.00065e-185	8.0427e-184
Bv3_064600_wiae	blue	621.227	PREDICTED: disease resistance protein At4g27190 isoform X1 [Beta vulgaris subsp. vulgaris]	GO:0005524(ATP binding);GO:0005739(mitochondrion);GO:0006952(defense response);GO:0043531(ADP binding)	04626(Plant-pathogen interaction)	K13459	NA	6.01014	5.53797	5.33716	3.38648	2.97272	3.56456	1.81827	1.63786	1.96588	1.99291	2.23424	2.41204	0.0001	0.0001	0.0001	2.79716e-199	3.50642e-198
Bv6_130500_cmug	blue	621.063	hypothetical protein BVRB_6g130500 [Beta vulgaris subsp. vulgaris]	GO:0005737(cytoplasm)	00561(Glycerolipid metabolism);00564(Glycerophospholipid metabolism)	K13508	EC:2.3.1.15;EC:2.3.1.198	6.41558	6.6561	5.05658	8.38585	7.1465	7.82803	10.6337	11.1794	10.6753	11.4685	12.7689	11.2683	15.3622	15.9914	15.4599	8.73599e-40	2.52283e-39
Bv9_212900_yrsd	blue	619.789	hypothetical protein BVRB_9g212900 isoform B [Beta vulgaris subsp. vulgaris];hypothetical protein BVRB_9g212900 isoform A [Beta vulgaris subsp. vulgaris]	GO:0003674(molecular_function);GO:0005634(nucleus);GO:0008150(biological_process);GO:0008150(biological_process)	NA	NA	NA	2.87295	1.71256	3.19028	7.05336	8.62556	5.02208	12.5536	10.9072	16.2413	16.5185	13.3739	15.8347	38.4711	35.1637	44.6927	2.2795e-52	8.14431e-52
Bv8_186170_wzzs	blue	619.497	hypothetical protein BVRB_8g186170 [Beta vulgaris subsp. vulgaris]	GO:0003674(molecular_function);GO:0005634(nucleus);GO:0008150(biological_process)	NA	NA	NA	4.15434	3.76072	3.40154	5.88931	4.5627	5.72802	11.1852	11.4386	12.2853	15.7781	15.1622	15.5089	23.7336	22.0369	24.0082	1.90115e-108	1.27139e-107
Bv3_056100_xhcu	blue	619.331	PREDICTED: arabinogalactan peptide 13 [Beta vulgaris subsp. vulgaris]	GO:0005886(plasma membrane);GO:0031225(anchored component of membrane)	NA	NA	NA	19.6635	20.4317	19.2385	15.4837	14.8532	16.5307	64.5874	63.259	68.7926	75.4502	70.8128	67.1163	137.213	139.769	144.634	0	0
Bv1_020100_axrz	blue	618.503	PREDICTED: E3 ubiquitin-protein ligase RING1 [Beta vulgaris subsp. vulgaris]	GO:0043161(proteasome-mediated ubiquitin-dependent protein catabolic process);GO:0061630(ubiquitin protein ligase activity)	NA	NA	NA	18.5222	16.5864	15.4669	44.2954	45.3816	42.4854	67.1027	67.0091	64.2787	57.7395	48.5741	47.3521	89.947	85.7096	84.0122	5.72725e-185	6.59173e-184
Bv2_029430_xhxq	blue	618.15	hypothetical protein BVRB_2g029430 [Beta vulgaris subsp. vulgaris]	GO:0003674(molecular_function);GO:0008150(biological_process)	NA	NA	NA	1.22386	0.962715	0.97719	17.0221	17.6632	16.4442	37.2492	35.089	35.9291	17.6071	16.146	15.52	69.9661	69.3702	70.6577	0	0
Bv8_182560_itga	blue	617.238	PREDICTED: uncharacterized protein LOC104900627 [Beta vulgaris subsp. vulgaris]	GO:0003674(molecular_function);GO:0008150(biological_process);GO:0009507(chloroplast)	NA	NA	NA	28.5148	28.6077	31.3159	31.8696	33.308	29.12	47.5791	45.6819	43.298	43.3817	46.8768	50.1223	63.86	62.7767	65.4823	6.61188e-48	2.19421e-47
Bv_008200_zqtr	blue	617.122	PREDICTED: calmodulin-like protein 1 [Beta vulgaris subsp. vulgaris]	GO:0005509(calcium ion binding);GO:0005739(mitochondrion);GO:0005886(plasma membrane);GO:0008150(biological_process)	04626(Plant-pathogen interaction)	K13448	NA	5.511	6.2815	5.94957	25.5365	27.1047	29.9478	29.503	27.4476	32.1361	22.565	21.6302	23.5494	78.7259	79.4661	81.7775	0	0
Bv5_099100_cywa	blue	615.296	PREDICTED: uncharacterized protein LOC104892176 [Beta vulgaris subsp. vulgaris]	NA	NA	NA	NA	3.97059	2.80628	1.09147	119.621	125.033	122.757	379.257	395.329	424.012	601.672	550.209	602.083	866.904	871.042	902.27	3.89893e-216	5.36216e-215
Bv5_108420_djtu	blue	614.596	PREDICTED: serine/threonine-protein kinase At5g01020 [Beta vulgaris subsp. vulgaris]	GO:0005524(ATP binding);GO:0006952(defense response);GO:0016301(kinase activity);GO:0016310(phosphorylation)	NA	NA	NA	25.1826	25.8688	25.9345	28.7283	24.7987	27.7536	44.8383	38.6977	35.0059	38.692	38.358	38.2158	62.6781	65.7908	66.5896	3.31235e-83	1.73612e-82
Bv3_063480_uapn	blue	614.089	PREDICTED: cytochrome P450 94A1 [Beta vulgaris subsp. vulgaris]	GO:0004497(monooxygenase activity);GO:0005506(iron ion binding);GO:0009507(chloroplast);GO:0016705(oxidoreductase activity, acting on paired donors, with incorporation or reduction of molecular oxygen);GO:0019825(oxygen binding);GO:0020037(heme binding);GO:0055114(oxidation-reduction process)	00073(Cutin, suberine and wax biosynthesis)	K13407	EC:1.14.-.-	3.70805	3.57678	3.38092	16.0376	14.787	14.9779	15.2178	15.1288	14.548	11.9665	10.9159	11.7208	34.2288	33.1466	32.5849	0	0
Bv6_136960_yzof	blue	613.929	PREDICTED: acylamino-acid-releasing enzyme-like isoform X2 [Beta vulgaris subsp. vulgaris]	GO:0005634(nucleus);GO:0005737(cytoplasm);GO:0005773(vacuole);GO:0005829(cytosol);GO:0006508(proteolysis);GO:0009507(chloroplast);GO:0051289(protein homotetramerization);GO:0070009(serine-type aminopeptidase activity)	NA	NA	NA	6.9948	6.86179	5.18652	6.62786	8.06877	7.92015	10.0832	10.6956	9.4645	11.3793	10.1087	9.98255	16.8418	17.1798	15.1136	4.08459e-29	9.6097e-29
Bv4_075430_ixkd	blue	613.352	PREDICTED: wall-associated receptor kinase 5-like [Beta vulgaris subsp. vulgaris]	GO:0004674(protein serine/threonine kinase activity);GO:0005886(plasma membrane);GO:0007166(cell surface receptor signaling pathway)	NA	NA	NA	553.369	550.456	502.957	411.525	390.401	400.575	293.979	273.445	274.782	309.455	312.879	338.744	178.753	177.55	179.047	3.65615e-163	3.66562e-162
Bv2_028640_xrtg	blue	612.794	hypothetical protein BVRB_2g028640 [Beta vulgaris subsp. vulgaris]	NA	NA	NA	NA	3.99649	3.63764	3.3177	7.40926	5.58368	5.03058	10.4099	9.1762	9.07456	8.2069	7.19532	8.5281	21.93	18.7031	17.6331	4.03271e-52	1.43327e-51
Bv2_025410_kjqj	blue	612.168	PREDICTED: protein phosphatase 2C 37 [Beta vulgaris subsp. vulgaris]	GO:0004721(phosphoprotein phosphatase activity);GO:0004722(protein serine/threonine phosphatase activity);GO:0005515(protein binding);GO:0005634(nucleus);GO:0005737(cytoplasm);GO:0005829(cytosol);GO:0006470(protein dephosphorylation);GO:0009409(response to cold);GO:0009414(response to water deprivation);GO:0009737(response to abscisic acid);GO:0009738(abscisic acid-activated signaling pathway);GO…	04016(MAPK signaling pathway - plant);04075(Plant hormone signal transduction)	K14497	EC:3.1.3.16	28.1628	29.5342	31.0502	43.3118	42.1908	43.7154	40.1378	40.4398	42.2862	42.6933	40.9456	40.5558	64.5378	59.642	59.7614	9.50496e-73	4.46964e-72
Bv5_102130_wnsu	blue	611.908	PREDICTED: 7-deoxyloganetic acid glucosyltransferase-like [Beta vulgaris subsp. vulgaris]	GO:0035251(UDP-glucosyltransferase activity);GO:1900994((-)-secologanin biosynthetic process)	NA	NA	NA	5.64199	5.55865	7.72261	25.7941	26.9476	27.4103	24.6817	26.4434	27.2204	21.8066	23.1098	21.0519	46.8866	48.5366	47.2203	2.49203e-195	3.04744e-194
Bv7_165500_sxty	blue	610.263	PREDICTED: phosphatidylinositol:ceramide inositolphosphotransferase 1-like [Beta vulgaris subsp. vulgaris]	GO:0005802(trans-Golgi network);GO:0005886(plasma membrane);GO:0016021(integral component of membrane);GO:0030148(sphingolipid biosynthetic process);GO:0045140(inositol phosphoceramide synthase activity)	00600(Sphingolipid metabolism)	K04714	EC:2.7.8.27	307.649	275.731	277.337	229.029	233.492	227.494	147.257	153.402	141.037	193.429	207.465	193.14	88.6822	96.9969	91.6193	5.4868e-171	5.78844e-170
Bv1_001760_owzx	blue	609.958	PREDICTED: myb-related protein 308 [Beta vulgaris subsp. vulgaris]	GO:0000981(RNA polymerase II transcription factor activity, sequence-specific DNA binding);GO:0001135(transcription factor activity, RNA polymerase II transcription factor recruiting);GO:0003677(DNA binding);GO:0003700(DNA binding transcription factor activity);GO:0005634(nucleus);GO:0006351(transcription, DNA-templated);GO:0006355(regulation of transcription, DNA-templated);GO:0006357(regulation…	NA	NA	NA	3.44036	4.4676	3.81979	6.51596	7.52954	5.70922	14.4245	12.7328	11.611	10.1561	10.1232	11.0756	17.13	16.8077	18.2953	2.12503e-59	8.46755e-59
Bv5_100240_fyeq	blue	609.867	PREDICTED: E3 ubiquitin-protein ligase RHA1B-like [Beta vulgaris subsp. vulgaris]	GO:0005634(nucleus);GO:0008270(zinc ion binding);GO:0009741(response to brassinosteroid);GO:0010200(response to chitin);GO:0016021(integral component of membrane);GO:0016567(protein ubiquitination);GO:0043161(proteasome-mediated ubiquitin-dependent protein catabolic process);GO:0061630(ubiquitin protein ligase activity)	NA	NA	NA	13.3942	9.7481	13.4046	10.1545	10.9872	12.2581	28.3442	29.9002	32.3837	28.0982	27.0938	28.9101	60.1637	65.9066	67.1213	2.11783e-159	2.08045e-158
Bv7_164070_fdqu	blue	609.824	hypothetical protein BVRB_7g164070 isoform A [Beta vulgaris subsp. vulgaris];hypothetical protein BVRB_7g164070 isoform B [Beta vulgaris subsp. vulgaris];PREDICTED: uncharacterized protein LOC104898961 isoform X2 [Beta vulgaris subsp. vulgaris]	GO:0005634(nucleus);GO:0005634(nucleus)	NA	NA	NA	17.3301	14.5208	16.6135	20.7626	23.2808	18.7641	25.1408	27.5129	23.24	27.5717	29.1013	30.2667	37.9425	43.1545	39.8279	2.8421e-32	7.15197e-32
Bv5_119570_yood	blue	609.093	PREDICTED: uncharacterized protein LOC104894524 [Beta vulgaris subsp. vulgaris]	NA	NA	NA	NA	10.2628	8.02654	8.0593	22.2063	26.362	22.415	32.5644	26.8722	30.2143	31.3952	28.7689	31.0901	40.7443	46.216	45.1779	9.9034e-93	5.71645e-92
Bv1_016800_akpr	blue	608.407	PREDICTED: non-specific phospholipase C4 [Beta vulgaris subsp. vulgaris]	GO:0003993(acid phosphatase activity);GO:0004629(phospholipase C activity);GO:0005886(plasma membrane);GO:0009395(phospholipid catabolic process);GO:0016788(hydrolase activity, acting on ester bonds);GO:0034480(phosphatidylcholine phospholipase C activity)	00562(Inositol phosphate metabolism);00564(Glycerophospholipid metabolism);00565(Ether lipid metabolism)	K01114	EC:3.1.4.3	0.0001	0.125237	0.0001	1.89122	2.25828	2.08142	5.74756	4.96117	5.4881	2.1358	2.88879	2.62055	9.6421	8.78327	8.83937	6.70698e-227	9.9369e-226
Bv1_002630_fexw	blue	608.278	PREDICTED: serine/arginine-rich splicing factor RS31 [Beta vulgaris subsp. vulgaris]	GO:0000398(mRNA splicing, via spliceosome);GO:0003723(RNA binding);GO:0005681(spliceosomal complex);GO:0005737(cytoplasm);GO:0008380(RNA splicing);GO:0016607(nuclear speck)	03040(Spliceosome)	K12893	NA	27.806	25.2754	26.9965	38.1661	39.2306	36.1766	36.4507	34.0152	36.4126	41.1025	39.4528	38.4807	55.4803	53.8804	52.1777	5.13554e-52	1.82114e-51
Bv2_041970_uhog	blue	608.056	hypothetical protein BVRB_2g041970 [Beta vulgaris subsp. vulgaris]	NA	NA	NA	NA	0.0770891	0.102677	0.141784	0.17719	0.0838703	0.118568	0.953799	1.0257	1.16518	0.981181	0.858223	1.15449	2.19531	1.87593	2.01678	6.11187e-87	3.33613e-86
Bv7_178450_wica	blue	606.173	PREDICTED: telomere length regulation protein TEL2 homolog [Beta vulgaris subsp. vulgaris]	NA	NA	NA	NA	19.5145	17.4921	15.8467	24.0557	24.1865	25.1347	28.9078	27.1391	28.0736	26.0319	28.0702	29.5915	33.8843	35.8595	36.9868	9.83054e-30	2.34124e-29
Bv1_023300_koth	blue	605.037	hypothetical protein BVRB_1g023300 [Beta vulgaris subsp. vulgaris]	NA	NA	NA	NA	12.0739	11.0896	9.70138	157.724	159.429	165.833	149.224	133.779	136.4	133.439	122.945	130.847	295.649	296.74	306.389	0	0
Bv2_040550_wexo	blue	605.012	PREDICTED: uncharacterized protein LOC104887415 [Beta vulgaris subsp. vulgaris]	GO:0003674(molecular_function);GO:0005634(nucleus);GO:0005773(vacuole);GO:0008150(biological_process)	NA	NA	NA	41.6669	40.5693	43.1177	40.6314	40.6444	36.6051	28.3342	28.6708	29.2265	36.252	35.3989	32.81	10.4523	10.6934	9.74559	2.35746e-203	3.03749e-202
Bv9_214470_rqip	blue	604.93	PREDICTED: uncharacterized protein LOC104903963 [Beta vulgaris subsp. vulgaris]	GO:0000149(SNARE binding);GO:0005484(SNAP receptor activity);GO:0006886(intracellular protein transport);GO:0006906(vesicle fusion);GO:0012505(endomembrane system);GO:0016021(integral component of membrane);GO:0031201(SNARE complex);GO:0048278(vesicle docking)	NA	NA	NA	163.012	159.449	161.732	126.977	115.894	136.245	122.367	108.84	111.123	107.983	109.333	112.366	80.4164	76.1383	72.6747	1.80099e-51	6.32396e-51
Bv7_163090_qyhx	blue	604.226	PREDICTED: probable transmembrane GTPase FZO-like, chloroplastic [Beta vulgaris subsp. vulgaris]	GO:0003824(catalytic activity);GO:0005525(GTP binding);GO:0009507(chloroplast);GO:0009535(chloroplast thylakoid membrane);GO:0009706(chloroplast inner membrane);GO:0009707(chloroplast outer membrane);GO:0010027(thylakoid membrane organization);GO:0010228(vegetative to reproductive phase transition of meristem);GO:0016021(integral component of membrane);GO:0016787(hydrolase activity);GO:0031969(ch…	NA	NA	NA	32.5111	32.1536	34.5649	42.3235	40.9038	38.7886	46.436	39.127	44.9477	42.7356	47.2016	51.354	76.4487	75.1978	80.6398	1.11185e-55	4.18273e-55
Bv5_108390_xsij	blue	603.236	PREDICTED: SH3 domain-containing protein 1 isoform X2 [Beta vulgaris subsp. vulgaris]	GO:0005515(protein binding);GO:0005634(nucleus);GO:0005783(endoplasmic reticulum);GO:0005794(Golgi apparatus);GO:0005829(cytosol);GO:0005886(plasma membrane);GO:0012505(endomembrane system);GO:0030136(clathrin-coated vesicle);GO:0030276(clathrin binding)	04144(Endocytosis)	K11247	NA	5.80536	6.9312	7.22521	12.5981	12.8423	11.8409	13.4326	14.0296	14.1344	12.6339	11.6981	9.84288	19.9741	19.8862	20.5147	4.79439e-45	1.5168e-44
Bv_005320_amap	blue	602.883	PREDICTED: thylakoid membrane protein TERC, chloroplastic [Beta vulgaris subsp. vulgaris]	GO:0005515(protein binding);GO:0005886(plasma membrane);GO:0009534(chloroplast thylakoid);GO:0009535(chloroplast thylakoid membrane);GO:0010027(thylakoid membrane organization);GO:0016021(integral component of membrane);GO:0090351(seedling development)	NA	NA	NA	4.92318	6.05827	5.07615	8.60287	7.54424	8.65642	8.54342	7.81188	8.94521	10.3048	9.04323	8.38877	13.9211	14.1193	12.8	1.26843e-27	2.88064e-27
Bv9_213350_xzpo	blue	602.585	hypothetical protein BVRB_9g213350 [Beta vulgaris subsp. vulgaris]	NA	NA	NA	NA	2.51787	2.24404	2.60387	5.12385	5.01889	6.39214	9.56076	9.02659	8.26814	12.3276	12.4333	11.3935	17.041	17.3565	15.1889	7.55773e-59	2.98829e-58
Bv7_157800_pmdo	blue	602.387	PREDICTED: alpha-soluble NSF attachment protein 2 [Beta vulgaris subsp. vulgaris]	GO:0005483(soluble NSF attachment protein activity);GO:0005774(vacuolar membrane);GO:0006886(intracellular protein transport);GO:0019905(syntaxin binding);GO:0031201(SNARE complex);GO:0035494(SNARE complex disassembly);GO:0061025(membrane fusion)	NA	NA	NA	42.4092	43.9688	42.0358	26.4705	29.8662	24.375	30.8401	30.4597	30.1319	25.1374	26.8539	24.4124	6.6443	8.91275	8.18419	5.00403e-96	2.99689e-95
Bv2_031730_wwud	blue	602.247	PREDICTED: BURP domain protein RD22-like isoform X1 [Beta vulgaris subsp. vulgaris]	GO:0005576(extracellular region);GO:0005768(endosome);GO:0005794(Golgi apparatus);GO:0005802(trans-Golgi network);GO:0006950(response to stress);GO:0009269(response to desiccation);GO:0009651(response to salt stress);GO:0009737(response to abscisic acid);GO:0045735(nutrient reservoir activity)	04144(Endocytosis)	K12472	NA	0.280426	0.245579	0.163163	15.2272	15.212	14.9624	70.6589	71.4516	68.9841	99.3298	97.1062	101.271	152.954	143.475	147.132	0	0
Bv5_107020_wtod	blue	601.71	hypothetical protein BVRB_5g107020 isoform A [Beta vulgaris subsp. vulgaris];hypothetical protein BVRB_5g107020 isoform B [Beta vulgaris subsp. vulgaris];hypothetical protein BVRB_5g107020 isoform C [Beta vulgaris subsp. vulgaris]	NA	NA	NA	NA	1.60486	1.89661	1.87937	2.07339	2.31314	1.98405	3.30705	3.16854	3.05483	4.31281	3.70578	3.08768	6.35209	6.22094	5.5333	1.51043e-38	4.26076e-38
Bv1_008770_qufe	blue	601.602	PREDICTED: protein EXORDIUM [Beta vulgaris subsp. vulgaris]	GO:0003674(molecular_function);GO:0005576(extracellular region);GO:0005615(extracellular space);GO:0005618(cell wall);GO:0005794(Golgi apparatus);GO:0005829(cytosol);GO:0009505(plant-type cell wall);GO:0009741(response to brassinosteroid);GO:0048046(apoplast)	NA	NA	NA	1.17125	0.971511	1.23838	1.56837	1.6517	1.99998	2.43925	3.02422	2.61298	2.23133	1.77529	2.06652	5.91965	6.03494	5.70982	1.34569e-80	6.90268e-80
Bv6_151330_ydsf	blue	601.44	multiple RNA-binding domain-containing protein 1-like [Chenopodium quinoa]	GO:0003723(RNA binding);GO:0005634(nucleus);GO:0005730(nucleolus);GO:0008150(biological_process);GO:0008150(biological_process)	NA	NA	NA	2.19393	2.43375	2.40273	3.54041	2.95439	2.93231	3.93423	3.99852	4.14843	3.10728	3.27644	3.06177	5.58936	5.76258	5.65615	9.55429e-20	1.7837e-19
Bv7_163880_yqqm	blue	600.597	PREDICTED: uncharacterized protein LOC104898946 [Beta vulgaris subsp. vulgaris]	GO:0003674(molecular_function);GO:0008150(biological_process)	00780(Biotin metabolism)	K19562	EC:6.3.3.3;EC:2.6.1.62	15.4253	16.8238	14.1661	21.9932	24.3974	25.7162	20.7436	24.5819	24.8624	24.1834	24.7446	25.5879	39.7674	36.4168	40.1656	4.30292e-43	1.31803e-42
Bv9_220610_cqjo	blue	600.55	PREDICTED: MAR-binding filament-like protein 1-1 [Beta vulgaris subsp. vulgaris]	GO:0005515(protein binding)	NA	NA	NA	15.9072	16.345	16.1873	20.0022	23.5846	22.7106	23.4188	24.7677	23.5961	25.1353	21.0819	23.865	37.2236	37.2703	32.3192	4.63155e-26	1.01457e-25
Bv7_177570_ngpd	blue	600.459	PREDICTED: F-box/kelch-repeat protein At1g51550 [Beta vulgaris subsp. vulgaris]	GO:0004842(ubiquitin-protein transferase activity);GO:0005634(nucleus);GO:0006511(ubiquitin-dependent protein catabolic process)	04712(Circadian rhythm - plant)	K12115	NA	9.45077	7.54696	7.51315	16.6416	16.2533	13.9357	19.125	20.2849	21.3234	14.9949	15.3153	15.3997	30.2331	31.0055	36.2786	2.51963e-54	9.26026e-54
Bv7_160570_exmi	blue	600.187	PREDICTED: 14-3-3 protein 1 [Beta vulgaris subsp. vulgaris]	NA	NA	NA	NA	0.652907	2.09871	1.37295	7.21473	7.78168	8.61847	7.01719	6.16263	6.22657	9.37697	7.05998	7.5836	16.5722	17.1426	15.4836	1.86936e-41	5.54872e-41
Bv4_090910_ipcm	blue	599.466	PREDICTED: uncharacterized protein LOC104891992 [Beta vulgaris subsp. vulgaris]	GO:0003674(molecular_function);GO:0005634(nucleus);GO:0005829(cytosol);GO:0008150(biological_process)	NA	NA	NA	10.1437	10.0832	10.0838	13.0184	13.5872	13.8028	15.3921	15.4988	16.9449	17.0537	17.1201	17.0422	19.1996	20.2697	21.1532	3.91732e-42	1.17842e-41
Bv9_222770_qxki	blue	599.286	hypothetical protein BVRB_9g222770 [Beta vulgaris subsp. vulgaris]	GO:0003674(molecular_function);GO:0005739(mitochondrion);GO:0008150(biological_process)	NA	NA	NA	151.702	142.875	136.742	89.8363	81.9102	78.8755	84.4728	79.1663	74.4789	83.7858	75.0601	91.4994	28.6331	24.8149	26.8004	1.51762e-149	1.38475e-148
Bv2_026860_cint	blue	598.7	PREDICTED: LOB domain-containing protein 41 [Beta vulgaris subsp. vulgaris]	GO:0005634(nucleus);GO:0006355(regulation of transcription, DNA-templated)	NA	NA	NA	0.755014	0.970194	0.71739	28.0692	29.3238	30.2735	82.5334	75.485	78.5105	33.1504	33.1183	30.3686	136.444	141.191	139.708	0	0
Bv3_054780_jnai	blue	597.925	PREDICTED: serine carboxypeptidase-like 33 [Beta vulgaris subsp. vulgaris]	GO:0004185(serine-type carboxypeptidase activity);GO:0005773(vacuole);GO:0051603(proteolysis involved in cellular protein catabolic process)	NA	NA	NA	2.39093	2.32036	2.31086	3.56849	2.09472	2.57984	9.72759	10.7024	10.7659	16.9863	16.4307	19.6521	42.4704	39.0076	45.3549	3.89706e-257	6.592e-256
Bv8_180870_orjq	blue	597.706	hypothetical protein BVRB_8g180870 [Beta vulgaris subsp. vulgaris]	GO:0003779(actin binding);GO:0005515(protein binding);GO:0005737(cytoplasm);GO:0005856(cytoskeleton);GO:0030036(actin cytoskeleton organization);GO:0031209(SCAR complex);GO:0051127(positive regulation of actin nucleation)	00620(Pyruvate metabolism);00710(Carbon fixation in photosynthetic organisms)	K01595	EC:4.1.1.31	83.8838	81.7787	87.22	124.336	120.82	131.658	115.395	118.48	114.007	122.623	136.979	133.314	183.449	176.309	180.506	6.71851e-65	2.88355e-64
Bv5_099730_wiot	blue	597.651	PREDICTED: probable membrane-associated kinase regulator 2 [Beta vulgaris subsp. vulgaris]	GO:0003674(molecular_function);GO:0005634(nucleus);GO:0005886(plasma membrane);GO:0008150(biological_process)	NA	NA	NA	8.89729	11.3588	11.3457	13.1657	14.5397	12.6674	16.3837	17.2908	19.4601	19.7762	22.7114	17.4207	30.1906	32.9727	28.4449	4.01181e-35	1.0649e-34
Bv5_107480_tgxq	blue	596.757	PREDICTED: replication protein A 70 kDa DNA-binding subunit A [Beta vulgaris subsp. vulgaris]	GO:0005634(nucleus)	03030(DNA replication);03420(Nucleotide excision repair);03430(Mismatch repair);03440(Homologous recombination)	K07466	NA	5.65238	6.06358	5.77966	9.14875	10.3679	8.66318	11.1622	11.2298	11.6528	9.74338	11.806	11.5561	14.7391	14.9266	14.4687	3.70122e-44	1.15194e-43
Bv8_190750_qukn	blue	596.658	PREDICTED: protein TIFY 10b [Beta vulgaris subsp. vulgaris]	GO:0003714(transcription corepressor activity);GO:0005634(nucleus);GO:0009611(response to wounding);GO:0031347(regulation of defense response);GO:1903507(negative regulation of nucleic acid-templated transcription);GO:2000022(regulation of jasmonic acid mediated signaling pathway)	04075(Plant hormone signal transduction)	K13464	NA	1303.33	1209.1	1100.79	1042.47	1024.39	989.909	949.534	799.318	764.801	757.274	820.986	812.078	491.74	528.025	489.068	3.35138e-49	1.13481e-48
Bv_007640_nnsq	blue	596.466	PREDICTED: zinc transporter 4, chloroplastic [Beta vulgaris subsp. vulgaris]	GO:0005385(zinc ion transmembrane transporter activity);GO:0005886(plasma membrane);GO:0071577(zinc II ion transmembrane transport)	NA	NA	NA	33.8402	31.759	37.8684	43.6045	49.9849	44.0191	54.8269	61.0741	66.3428	70.1565	71.0609	72.541	90.3771	88.798	87.7805	5.26908e-69	2.3793e-68
Bv2_034190_kgxr	blue	596.45	PREDICTED: solute carrier family 25 member 44 [Beta vulgaris subsp. vulgaris]	GO:0003735(structural constituent of ribosome);GO:0006412(translation)	NA	NA	NA	2.43758	2.14617	2.2373	3.33676	3.70866	3.87318	11.1371	10.8649	12.1504	7.12766	6.83899	6.06515	26.3797	26.0888	28.508	0	0
Bv2_028790_erxy	blue	596.38	PREDICTED: serine/threonine-protein kinase-like protein At3g51990 [Beta vulgaris subsp. vulgaris]	GO:0005524(ATP binding);GO:0005576(extracellular region);GO:0005886(plasma membrane);GO:0006468(protein phosphorylation);GO:0016301(kinase activity);GO:0016310(phosphorylation)	NA	NA	NA	41.5201	43.6141	44.6932	42.0163	39.8055	41.6299	29.9641	31.3676	34.7034	28.0054	27.5522	29.1388	18.843	17.9832	19.456	2.1206e-86	1.15155e-85
Bv1_023290_auas	blue	596.215	PREDICTED: pentatricopeptide repeat-containing protein At2g01860 [Beta vulgaris subsp. vulgaris]	GO:0003723(RNA binding);GO:0004519(endonuclease activity);GO:0005739(mitochondrion);GO:0009451(RNA modification);GO:0043231(intracellular membrane-bounded organelle)	NA	NA	NA	10.7571	10.9359	10.406	95.8075	99.0841	98.3099	93.1661	91.8308	88.5255	68.1939	75.8112	73.9589	174.284	180.295	184.998	0	0
Bv3_051620_fqmw	blue	595.788	PREDICTED: protein phosphatase 2C 57 [Beta vulgaris subsp. vulgaris]	GO:0004722(protein serine/threonine phosphatase activity);GO:0005634(nucleus);GO:0005730(nucleolus);GO:0005737(cytoplasm);GO:0006470(protein dephosphorylation);GO:0008287(protein serine/threonine phosphatase complex);GO:0009507(chloroplast);GO:0009570(chloroplast stroma);GO:0009579(thylakoid);GO:0009767(photosynthetic electron transport chain);GO:0016021(integral component of membrane);GO:0016311…	NA	NA	NA	9.25623	9.40431	9.91603	12.6748	12.3086	13.4432	14.1561	14.7612	17.2722	13.9316	13.1397	13.991	20.928	18.8592	21.7223	4.13264e-26	9.06221e-26
Bv8_188990_ghuf	blue	595.087	hypothetical protein BVRB_8g188990 [Beta vulgaris subsp. vulgaris]	GO:0001653(peptide receptor activity);GO:0004383(guanylate cyclase activity);GO:0004672(protein kinase activity);GO:0004674(protein serine/threonine kinase activity);GO:0005515(protein binding);GO:0005524(ATP binding);GO:0005886(plasma membrane);GO:0006468(protein phosphorylation);GO:0006955(immune response);GO:0007169(transmembrane receptor protein tyrosine kinase signaling pathway);GO:0009506(p…	04016(MAPK signaling pathway - plant)	K20718	EC:2.7.11.1	36.7252	32.0695	32.8516	29.6941	26.3659	28.3344	22.1456	25.6317	20.0452	20.1379	25.4248	25.2337	12.9126	11.9037	10.3697	3.41208e-33	8.7416e-33
Bv2_024140_qpfw	blue	594.306	PREDICTED: PHD finger protein ING1 isoform X2 [Beta vulgaris subsp. vulgaris];PREDICTED: PHD finger protein ING1 isoform X1 [Beta vulgaris subsp. vulgaris]	GO:0003677(DNA binding);GO:0005634(nucleus);GO:0006351(transcription, DNA-templated);GO:0006355(regulation of transcription, DNA-templated);GO:0016569(covalent chromatin modification);GO:0035064(methylated histone binding);GO:0040008(regulation of growth);GO:0046872(metal ion binding);GO:0046872(metal ion binding)	NA	NA	NA	2.88038	2.85807	2.44032	2.82555	3.8153	3.25645	4.47941	4.02311	3.8169	3.83752	4.31709	4.22299	6.10752	5.74346	5.7123	7.24086e-21	1.39065e-20
Bv4_092860_ofcr	blue	594.269	PREDICTED: calcium-dependent protein kinase 1 [Beta vulgaris subsp. vulgaris]	GO:0004683(calmodulin-dependent protein kinase activity);GO:0005516(calmodulin binding);GO:0005634(nucleus);GO:0005737(cytoplasm);GO:0005886(plasma membrane);GO:0009738(abscisic acid-activated signaling pathway);GO:0009931(calcium-dependent protein serine/threonine kinase activity);GO:0018105(peptidyl-serine phosphorylation);GO:0035556(intracellular signal transduction);GO:0046777(protein autopho…	04626(Plant-pathogen interaction)	K13412	EC:2.7.11.1	204.864	204.526	209.949	174.72	170.179	174.489	94.7606	98.9756	94.2995	130.601	128.534	134.487	65.7598	66.7978	65.1261	2.12493e-257	3.60402e-256
Bv1_009310_kodd	blue	594.221	PREDICTED: mannan endo-1,4-beta-mannosidase 4-like [Beta vulgaris subsp. vulgaris]	GO:0016985(mannan endo-1,4-beta-mannosidase activity);GO:0046355(mannan catabolic process)	00051(Fructose and mannose metabolism)	K19355	EC:3.2.1.78	9.63287	10.0328	11.8866	11.7593	13.2199	14.1946	14.2575	14.2869	13.1607	15.1544	14.4177	14.9086	22.7544	21.5388	20.0295	8.99884e-29	2.10331e-28
Bv7_165110_xwyu	blue	593.605	PREDICTED: major allergen Mal d 1 [Beta vulgaris subsp. vulgaris]	GO:0004864(protein phosphatase inhibitor activity);GO:0005634(nucleus);GO:0005737(cytoplasm);GO:0009738(abscisic acid-activated signaling pathway);GO:0010427(abscisic acid binding);GO:0080163(regulation of protein serine/threonine phosphatase activity)	NA	NA	NA	251.17	251.489	269.992	161.337	164.885	164.342	154.066	150.299	153.566	103.804	102.912	103.554	35.7476	37.769	36.9284	0	0
Bv6_154800_gotm	blue	593.261	PREDICTED: thioredoxin H2-like [Beta vulgaris subsp. vulgaris]	GO:0000103(sulfate assimilation);GO:0005829(cytosol);GO:0005886(plasma membrane);GO:0006457(protein folding);GO:0015035(protein disulfide oxidoreductase activity);GO:0016671(oxidoreductase activity, acting on a sulfur group of donors, disulfide as acceptor);GO:0034599(cellular response to oxidative stress);GO:0045454(cell redox homeostasis);GO:0055114(oxidation-reduction process)	NA	NA	NA	27.3701	28.855	30.7843	25.2469	29.142	26.0615	71.3423	83.4806	83.8174	93.132	86.6312	94.4351	143.721	140.808	144.569	2.93437e-284	5.6425e-283
Bv9_218690_gxcy	blue	592.333	PREDICTED: uncharacterized protein LOC104904471 [Beta vulgaris subsp. vulgaris]	GO:0005516(calmodulin binding);GO:0005634(nucleus);GO:0005886(plasma membrane);GO:0008150(biological_process)	NA	NA	NA	464.378	453.678	462.528	386.157	381.532	362.838	169.917	172.816	181.365	185.041	172.909	184.378	56.3091	49.388	58.5264	0	0
Bv3_069300_uaqe	blue	592.309	PREDICTED: adenylate isopentenyltransferase 5, chloroplastic [Beta vulgaris subsp. vulgaris]	GO:0005739(mitochondrion);GO:0006400(tRNA modification);GO:0052381(tRNA dimethylallyltransferase activity)	00908(Zeatin biosynthesis)	K10760	EC:2.5.1.27;EC:2.5.1.112	1.20568	1.20169	2.05434	1.46709	1.95604	2.61628	5.72663	5.70128	5.4887	11.3924	10.7097	9.78914	19.9022	20.5229	19.4635	1.19719e-117	8.63603e-117
Bv1_016060_ayyz	blue	591.99	PREDICTED: uncharacterized protein LOC109136230 [Beta vulgaris subsp. vulgaris]	GO:0005634(nucleus)	NA	NA	NA	0.981623	1.1845	1.0155	2.25862	2.34731	2.22142	2.76673	3.05991	2.83094	2.13268	2.45396	1.98675	7.38832	6.19102	6.13464	1.19286e-65	5.16053e-65
Bv6_139490_ncgf	blue	591.977	PREDICTED: pentatricopeptide repeat-containing protein At4g39620, chloroplastic [Beta vulgaris subsp. vulgaris]	GO:0003723(RNA binding);GO:0004519(endonuclease activity);GO:0009451(RNA modification);GO:0009507(chloroplast);GO:0009793(embryo development ending in seed dormancy);GO:0043231(intracellular membrane-bounded organelle)	NA	NA	NA	5.86968	4.62526	4.87726	10.8116	10.8849	11.6822	12.2924	9.94964	12.4119	14.6176	14.8775	15.2085	19.9605	20.6357	19.5294	3.436e-49	1.16325e-48
Bv3_060510_yqpc	blue	591.038	PREDICTED: CDK5RAP3-like protein [Beta vulgaris subsp. vulgaris]	GO:0000079(regulation of cyclin-dependent protein serine/threonine kinase activity);GO:0007346(regulation of mitotic cell cycle);GO:0012505(endomembrane system)	NA	NA	NA	5.05758	4.47284	4.2456	6.84836	6.15525	6.36951	9.78653	10.6633	9.68268	8.08081	9.22822	8.61835	12.1019	12.3715	11.6916	1.80944e-66	7.89277e-66
Bv7_169200_gwjf	blue	590.72	PREDICTED: protein LURP-one-related 11 [Beta vulgaris subsp. vulgaris]	GO:0006952(defense response)	03013(RNA transport)	K03239	NA	10.8123	9.6073	11.9676	23.9855	25.3208	23.2025	28.4283	31.0573	34.1601	27.557	21.5296	23.7318	92.9705	86.8672	93.7288	4.21361e-258	7.17221e-257
Bv7_160630_wyjw	blue	590.319	PREDICTED: probable 3-deoxy-D-manno-octulosonic acid transferase, mitochondrial [Beta vulgaris subsp. vulgaris]	GO:0005886(plasma membrane);GO:0009245(lipid A biosynthetic process);GO:0016740(transferase activity)	NA	NA	NA	6.7731	5.22648	5.68103	7.81099	7.68117	8.5393	7.92416	8.40523	7.17623	8.15435	8.93416	8.66959	14.7673	15.2603	15.1175	5.95754e-32	1.48637e-31
Bv4_072930_rjoj	blue	590.038	PREDICTED: cinnamoyl-CoA reductase 1 isoform X2 [Beta vulgaris subsp. vulgaris];hypothetical protein BVRB_4g072930 isoform B [Beta vulgaris subsp. vulgaris]	GO:0004022(alcohol dehydrogenase (NAD) activity);GO:0005794(Golgi apparatus);GO:0005829(cytosol);GO:0005886(plasma membrane);GO:0009506(plasmodesma);GO:0050662(coenzyme binding);GO:0050662(coenzyme binding)	00940(Phenylpropanoid biosynthesis);00940(Phenylpropanoid biosynthesis)	K09753	EC:1.2.1.44	6.12937	6.74003	7.02271	7.41394	8.04461	7.00306	35.2062	29.6828	27.4758	22.2145	22.4372	21.2895	46.753	49.5721	49.1024	1.31463e-193	1.58919e-192
Bv2_047910_kwwi	blue	589.531	PREDICTED: uncharacterized protein LOC104906393 [Beta vulgaris subsp. vulgaris]	GO:0003674(molecular_function);GO:0005634(nucleus);GO:0008150(biological_process)	NA	NA	NA	12.3081	11.7445	12.7923	17.8724	17.6482	17.709	15.42	16.0219	15.577	18.322	18.539	17.0979	26.3082	26.5721	26.6685	1.62548e-79	8.22448e-79
Bv1_004190_pnzx	blue	589.522	PREDICTED: mitogen-activated protein kinase homolog MMK2 [Beta vulgaris subsp. vulgaris]	GO:0000911(cytokinesis by cell plate formation);GO:0004672(protein kinase activity);GO:0004707(MAP kinase activity);GO:0005515(protein binding);GO:0005524(ATP binding);GO:0005634(nucleus);GO:0005737(cytoplasm);GO:0005829(cytosol);GO:0005874(microtubule);GO:0006468(protein phosphorylation);GO:0006972(hyperosmotic response);GO:0007112(male meiosis cytokinesis);GO:0007165(signal transduction);GO:000…	04016(MAPK signaling pathway - plant)	K20600	EC:2.7.11.24	100.096	100.694	95.1597	84.4034	78.6283	75.7746	44.184	42.3372	37.984	62.2494	67.7816	63.6603	24.1797	23.2476	22.8925	5.07173e-216	6.96501e-215
Bv5_120850_ukak	blue	588.938	PREDICTED: LOB domain-containing protein 16 [Beta vulgaris subsp. vulgaris]	GO:0005634(nucleus);GO:0009888(tissue development);GO:0010311(lateral root formation);GO:0045893(positive regulation of transcription, DNA-templated)	NA	NA	NA	0.89902	0.91177	0.539729	0.809171	1.14518	1.01313	4.04901	4.3167	3.63082	3.5382	3.1388	4.49159	6.31535	6.67826	6.77425	1.27246e-67	5.62544e-67
Bv7_160620_koxw	blue	588.313	PREDICTED: protein FIZZY-RELATED 3 isoform X1 [Beta vulgaris subsp. vulgaris];PREDICTED: protein CHROMATIN REMODELING 24-like isoform X7 [Beta vulgaris subsp. vulgaris]	GO:0005515(protein binding);GO:0005634(nucleus);GO:0005834(heterotrimeric G-protein complex);GO:0007049(cell cycle);GO:0007165(signal transduction);GO:0010997(anaphase-promoting complex binding);GO:0016567(protein ubiquitination);GO:0051301(cell division);GO:0097027(ubiquitin-protein transferase activator activity);GO:1904668(positive regulation of ubiquitin protein ligase activity);GO:1904668(po…	04120(Ubiquitin mediated proteolysis);04120(Ubiquitin mediated proteolysis)	K03364	NA	1.75158	0.863276	1.62087	3.44928	3.92103	3.68254	6.1675	5.07892	5.0094	5.51669	4.52699	4.54628	7.00897	7.60237	7.37947	1.67652e-29	3.97486e-29
Bv2_030250_xmqw	blue	588.265	PREDICTED: uncharacterized protein LOC104908692 [Beta vulgaris subsp. vulgaris]	GO:0005739(mitochondrion);GO:0016740(transferase activity)	NA	NA	NA	5.8984	7.24637	6.54849	6.04982	5.00769	5.70732	9.75588	11.3496	11.819	13.619	12.527	13.72	24.0432	24.8493	24.6536	3.54653e-108	2.36672e-107
Bv4_087630_icdw	blue	587.964	PREDICTED: stem-specific protein TSJT1 [Beta vulgaris subsp. vulgaris]	GO:0004066(asparagine synthase (glutamine-hydrolyzing) activity);GO:0005829(cytosol);GO:0006529(asparagine biosynthetic process);GO:0006541(glutamine metabolic process);GO:0042803(protein homodimerization activity)	NA	NA	NA	12.0195	11.0682	11.7795	115.438	112.489	113.091	173.17	166.576	166.668	77.3278	81.9349	78.0001	471.116	471.698	474.321	0	0
Bv2_045050_iqfk	blue	586.062	PREDICTED: protein GLUTAMINE DUMPER 3 [Beta vulgaris subsp. vulgaris]	GO:0005515(protein binding);GO:0005634(nucleus);GO:0005886(plasma membrane);GO:0010585(glutamine secretion);GO:0016020(membrane);GO:0016021(integral component of membrane);GO:0080143(regulation of amino acid export)	NA	NA	NA	1.84762	1.773	1.27265	7.67552	7.51883	8.13266	7.87289	7.50591	7.04999	5.75369	4.95645	5.39215	18.5631	16.3561	17.277	8.20793e-111	5.62986e-110
Bv1_009470_kyxu	blue	584.989	PREDICTED: ethylene-responsive transcription factor RAP2-4 [Beta vulgaris subsp. vulgaris]	GO:0003677(DNA binding);GO:0003700(DNA binding transcription factor activity);GO:0005515(protein binding);GO:0005634(nucleus);GO:0006351(transcription, DNA-templated);GO:0006355(regulation of transcription, DNA-templated);GO:0006970(response to osmotic stress);GO:0009409(response to cold);GO:0009414(response to water deprivation);GO:0009416(response to light stimulus);GO:0009611(response to wound…	NA	NA	NA	283.9	281.784	303.226	278.029	276.194	292.708	351.328	379.418	403.029	363.578	345.376	367.168	587.998	579.15	599.175	5.43082e-66	2.35916e-65
Bv5_103041z1339	blue	583.994	hypothetical protein BVRB_5g103050 [Beta vulgaris subsp. vulgaris]	NA	NA	NA	NA	0.0001	0.0001	0.136146	0.418434	0.298714	0.546566	0.962483	0.994769	0.949736	1.14846	1.24106	1.20224	1.61756	2.05232	1.61502	1.10085e-17	1.93902e-17
Bv7_161020_sidy	blue	583.326	PREDICTED: protein CHUP1, chloroplastic [Beta vulgaris subsp. vulgaris]	GO:0009658(chloroplast organization);GO:0009707(chloroplast outer membrane)	NA	NA	NA	19.6135	20.0799	22.8173	16.3084	17.5932	18.0542	15.5378	15.4832	16.3761	13.3971	11.5122	13.7675	8.3279	7.79948	7.62744	2.73621e-37	7.54694e-37
Bv2_033000_mtso	blue	583.2	PREDICTED: zinc finger CCCH domain-containing protein 23 [Beta vulgaris subsp. vulgaris]	GO:0003676(nucleic acid binding);GO:0003677(DNA binding);GO:0003700(DNA binding transcription factor activity);GO:0005634(nucleus);GO:0005886(plasma membrane);GO:0006355(regulation of transcription, DNA-templated);GO:0006979(response to oxidative stress);GO:0046872(metal ion binding)	NA	NA	NA	15.8626	15.7622	16.6053	21.4312	22.5225	22.6207	29.6284	32.0154	32.6589	23.7959	23.0406	22.2337	67.0071	66.0112	68.6452	0	0
Bv9_225800_dfhx	blue	583.174	PREDICTED: tyrosine aminotransferase isoform X2 [Beta vulgaris subsp. vulgaris]	GO:0004838(L-tyrosine:2-oxoglutarate aminotransferase activity);GO:0005737(cytoplasm);GO:0005829(cytosol);GO:0006520(cellular amino acid metabolic process);GO:0006559(L-phenylalanine catabolic process);GO:0006572(tyrosine catabolic process);GO:0009058(biosynthetic process);GO:0030170(pyridoxal phosphate binding);GO:0080130(L-phenylalanine:2-oxoglutarate aminotransferase activity)	00270(Cysteine and methionine metabolism);00350(Tyrosine metabolism);00360(Phenylalanine metabolism);00400(Phenylalanine, tyrosine and tryptophan biosynthesis);00130(Ubiquinone and other terpenoid-quinone biosynthesis);00950(Isoquinoline alkaloid biosynthesis);00960(Tropane, piperidine and pyridine alkaloid biosynthesis)	K00815	EC:2.6.1.5	6.17886	8.03463	6.33618	14.2653	19.5237	13.0484	22.1769	24.1437	16.7194	19.749	15.3193	16.6684	33.0836	38.9635	37.4454	2.69567e-33	6.92397e-33
Bv2_038530_mown	blue	582.916	PREDICTED: uncharacterized protein LOC104887134 [Beta vulgaris subsp. vulgaris]	GO:0016787(hydrolase activity)	NA	NA	NA	0.204224	0.200817	0.231194	0.590433	0.355036	0.427242	0.473925	0.476095	0.350942	0.579256	0.49621	0.472208	1.04218	1.05409	1.00365	2.14445e-20	4.07362e-20
Bv5_122360_wftj	blue	582.489	PREDICTED: polygalacturonase At1g48100 [Beta vulgaris subsp. vulgaris]	GO:0004650(polygalacturonase activity);GO:0005576(extracellular region);GO:0005975(carbohydrate metabolic process);GO:0016829(lyase activity);GO:0071555(cell wall organization)	00040(Pentose and glucuronate interconversions)	K01213	EC:3.2.1.67	5.09273	4.83633	6.1334	6.80278	6.2912	5.59962	32.5097	31.7467	30.3537	31.2509	31.0122	33.2283	49.1825	52.0971	48.5697	0	0
Bv5_108280_ehks	blue	582.422	hypothetical protein BVRB_5g108280 [Beta vulgaris subsp. vulgaris]	NA	NA	NA	NA	50.6114	50.1981	50.3334	72.6544	64.1648	68.2471	80.2282	68.7967	70.9761	75.1709	72.496	76.5241	180.535	170.871	177.804	1.40574e-213	1.9016e-212
Bv4_076670_zpks	blue	582.256	PREDICTED: homeobox protein cut [Beta vulgaris subsp. vulgaris]	GO:0003674(molecular_function);GO:0005634(nucleus);GO:0008150(biological_process)	NA	NA	NA	2.07964	2.08235	1.98836	4.86854	5.89921	5.85437	7.72179	7.89622	8.57133	12.3773	11.3397	11.2056	15.6851	14.1881	15.8886	6.98994e-156	6.68997e-155
Bv_015150_hkit	blue	581.143	hypothetical protein BVRB_015150 [Beta vulgaris subsp. vulgaris]	GO:0005634(nucleus);GO:0006355(regulation of transcription, DNA-templated)	NA	NA	NA	0.100366	0.232707	0.0544991	0.736846	0.757207	1.26842	1.35704	1.04162	1.17695	3.49144	3.39477	3.15387	8.0366	7.67871	8.39297	7.48412e-94	4.37454e-93
Bv2_044790_ttmh	blue	581.024	PREDICTED: zinc finger CCCH domain-containing protein 22 [Beta vulgaris subsp. vulgaris]	GO:0003676(nucleic acid binding);GO:0003677(DNA binding);GO:0005622(intracellular);GO:0005634(nucleus);GO:0008150(biological_process);GO:0046872(metal ion binding)	NA	NA	NA	8.43977	8.09788	8.45197	11.9766	11.8795	12.0425	10.8192	10.2166	12.2278	11.8239	12.6796	11.7124	17.1783	16.2781	17.3676	1.44565e-34	3.79174e-34
Bv7_162110_ptzm	blue	580.631	PREDICTED: RNA polymerase sigma factor sigF, chloroplastic [Beta vulgaris subsp. vulgaris]	GO:0003677(DNA binding);GO:0003700(DNA binding transcription factor activity);GO:0003899(DNA-directed 5'-3' RNA polymerase activity);GO:0005515(protein binding);GO:0005634(nucleus);GO:0006352(DNA-templated transcription, initiation);GO:0006355(regulation of transcription, DNA-templated);GO:0009507(chloroplast);GO:0009536(plastid);GO:0016987(bacterial sigma factor activity);GO:0045893(positive reg…	NA	NA	NA	5.53603	5.36036	4.99973	9.02653	10.0208	9.03232	8.49135	7.07099	8.38495	9.93228	9.77888	10.2352	19.336	18.4998	16.9644	1.14747e-56	4.38361e-56
Bv8_185830_qseo	blue	580.096	PREDICTED: mitogen-activated protein kinase kinase kinase A-like [Beta vulgaris subsp. vulgaris]	GO:0005737(cytoplasm)	04016(MAPK signaling pathway - plant)	K20716	NA	1.71405	1.16733	0.715562	1.50128	2.04915	0.99137	4.24221	2.87196	3.4355	2.4628	2.85631	2.51224	7.66539	7.48759	7.45482	1.94912e-22	3.90709e-22
Bv9_205850_sofh	blue	579.991	hypothetical protein BVRB_9g205850 [Beta vulgaris subsp. vulgaris]	GO:0003674(molecular_function);GO:0005634(nucleus);GO:0005886(plasma membrane);GO:0008150(biological_process)	NA	NA	NA	24.6992	24.0797	25.9831	32.6229	30.1485	32.8361	31.4657	31.8059	36.2673	44.561	43.4149	46.9359	59.2239	63.4758	63.105	8.96988e-64	3.7949e-63
Bv2_024320_rfzs	blue	579.747	hypothetical protein BVRB_2g024320 [Beta vulgaris subsp. vulgaris]	GO:0003674(molecular_function);GO:0005634(nucleus);GO:0008150(biological_process)	00053(Ascorbate and aldarate metabolism)	K00423	EC:1.10.3.3	3.02964	3.48768	2.81751	5.52379	6.02523	4.69312	7.6672	8.63438	8.0863	6.28859	7.74418	6.13521	12.3981	11.0562	14.7598	7.02118e-34	1.81968e-33
Bv3_059510_yhoo	blue	579.519	PREDICTED: cell division cycle 20.1, cofactor of APC complex [Beta vulgaris subsp. vulgaris]	GO:0005515(protein binding);GO:0005634(nucleus);GO:0005834(heterotrimeric G-protein complex);GO:0007049(cell cycle);GO:0007165(signal transduction);GO:0010997(anaphase-promoting complex binding);GO:0016567(protein ubiquitination);GO:0019900(kinase binding);GO:0033597(mitotic checkpoint complex);GO:0051301(cell division);GO:0097027(ubiquitin-protein transferase activator activity);GO:1904668(posit…	04120(Ubiquitin mediated proteolysis)	K03363	NA	1.4671	0.590482	1.45685	2.43415	2.06663	1.84584	2.54388	2.80061	2.77152	3.71014	3.99603	4.50105	9.07559	9.68945	11.168	8.45001e-49	2.8445e-48
Bv6_145500_gsts	blue	579.295	PREDICTED: PCTP-like protein [Beta vulgaris subsp. vulgaris]	GO:0005739(mitochondrion);GO:0008150(biological_process);GO:0008289(lipid binding)	NA	NA	NA	5.23904	3.93231	4.22663	4.90557	5.29817	4.79553	6.83158	7.22677	7.49769	9.2802	8.14619	8.61563	13.9882	12.0684	11.5695	2.6853e-34	7.00927e-34
Bv1_008500_eeun	blue	579.212	PREDICTED: uncharacterized protein At1g04910 [Beta vulgaris subsp. vulgaris]	GO:0005737(cytoplasm)	NA	NA	NA	4.75757	4.08347	3.81871	7.0804	7.45366	7.47027	14.8766	12.8079	13.8492	7.53761	8.59743	7.80386	20.3022	20.4224	20.4797	2.25734e-139	1.91945e-138
Bv7_169210_axgz	blue	579.098	PREDICTED: protein LURP-one-related 11 [Beta vulgaris subsp. vulgaris]	GO:0006952(defense response)	03013(RNA transport)	K03239	NA	57.1121	52.0227	58.4075	116.423	114.215	120.968	99.2456	144.409	141.818	116.402	117.883	110.901	401.127	380.784	376.054	4.6242e-187	5.38421e-186
Bv6_150200_jgri	blue	578.992	PREDICTED: exocyst complex component EXO70B1 [Beta vulgaris subsp. vulgaris]	GO:0000145(exocyst);GO:0005515(protein binding);GO:0005634(nucleus);GO:0005886(plasma membrane);GO:0006887(exocytosis);GO:0006904(vesicle docking involved in exocytosis);GO:0080092(regulation of pollen tube growth);GO:0090406(pollen tube)	NA	NA	NA	11.6064	13.6679	11.8947	12.6818	13.5978	18.0976	26.1762	25.7612	27.1866	18.7611	18.5336	20.4779	55.9794	52.5808	57.9307	3.46858e-92	1.98943e-91
Bv6_152910_drpz	blue	578.924	PREDICTED: uncharacterized protein LOC104897810 [Beta vulgaris subsp. vulgaris]	GO:0003677(DNA binding);GO:0005634(nucleus);GO:0008150(biological_process)	03008(Ribosome biogenesis in eukaryotes)	K14567	NA	5.24679	5.74743	5.90213	9.1383	9.35938	9.57189	9.62343	12.0949	10.0362	8.1093	8.51399	8.03438	17.4649	16.6964	16.3018	2.50806e-62	1.03908e-61
Bv8_182140_hsxp	blue	578.923	hypothetical protein BVRB_8g182140 [Beta vulgaris subsp. vulgaris]	GO:0004601(peroxidase activity);GO:0009505(plant-type cell wall);GO:0009664(plant-type cell wall organization)	00940(Phenylpropanoid biosynthesis)	K00430	EC:1.11.1.7	0.0001	0.0001	0.0001	2.98004	2.58843	2.92041	3.77729	3.87387	4.65489	5.71118	4.90583	7.58661	10.3524	15.0142	12.0102	7.36468e-53	2.65478e-52
Bv7_180350_swgz	blue	578.731	hypothetical protein BVRB_7g180350 [Beta vulgaris subsp. vulgaris]	NA	NA	NA	NA	0.396105	0.516355	0.871126	2.03277	1.8822	1.36505	2.75987	3.56739	2.16654	2.62219	3.27216	3.15896	4.68714	4.57884	5.47805	3.09142e-16	5.22738e-16
Bv7_160670_qxee	blue	578.683	hypothetical protein BVRB_7g160670 [Beta vulgaris subsp. vulgaris]	GO:0005634(nucleus)	NA	NA	NA	9.02308	8.33301	9.344	11.4106	11.3353	9.93692	12.239	12.5955	13.5268	10.8375	13.2281	10.3747	18.2202	18.069	17.7816	1.28969e-18	2.32959e-18
Bv1_015350_xnzs	blue	578.418	hypothetical protein BVRB_1g015350 [Beta vulgaris subsp. vulgaris]	GO:0005634(nucleus);GO:0005737(cytoplasm);GO:0008150(biological_process)	NA	NA	NA	1.14919	0.707126	0.833188	1.50884	1.89975	1.67802	1.74741	1.65413	1.69607	1.65133	2.11382	2.0725	3.29882	3.67461	4.07603	7.20094e-18	1.27476e-17
Bv8_192260_mjzp	blue	578.389	hypothetical protein BVRB_8g192260 [Beta vulgaris subsp. vulgaris]	GO:0043161(proteasome-mediated ubiquitin-dependent protein catabolic process);GO:0061630(ubiquitin protein ligase activity)	NA	NA	NA	14.8677	15.6197	15.4509	48.247	43.553	47.3385	74.9428	80.1126	82.1862	41.3833	33.4376	36.0909	147.493	147.173	145.593	0	0
Bv6_151580_dcqi	blue	578.368	PREDICTED: trihelix transcription factor GT-1 isoform X1 [Beta vulgaris subsp. vulgaris]	GO:0000981(RNA polymerase II transcription factor activity, sequence-specific DNA binding);GO:0003677(DNA binding);GO:0003700(DNA binding transcription factor activity);GO:0005515(protein binding);GO:0005634(nucleus);GO:0006351(transcription, DNA-templated);GO:0006355(regulation of transcription, DNA-templated);GO:0042802(identical protein binding);GO:0043565(sequence-specific DNA binding)	NA	NA	NA	8.38696	7.70813	11.0141	12.4779	11.9838	15.2572	13.9164	13.5974	15.9698	15.4583	13.4992	13.8786	21.9281	22.1916	20.99	3.32409e-19	6.11139e-19
Bv3_060170_xdss	blue	578.356	PREDICTED: uncharacterized protein LOC104889190 [Beta vulgaris subsp. vulgaris]	GO:0005515(protein binding);GO:0005739(mitochondrion);GO:0006457(protein folding);GO:0009644(response to high light intensity);GO:0009742(brassinosteroid mediated signaling pathway);GO:0042538(hyperosmotic salinity response);GO:0051510(regulation of unidimensional cell growth);GO:1903578(regulation of ATP metabolic process)	NA	NA	NA	2.74079	3.49327	2.83381	3.7968	4.30611	4.16121	5.45505	4.8556	5.23748	5.15593	3.69119	4.75533	8.23338	7.41837	7.20719	2.87244e-22	5.73552e-22
Bv4_070950_jkpx	blue	578.351	PREDICTED: uncharacterized protein LOC104889839 [Beta vulgaris subsp. vulgaris]	GO:0003746(translation elongation factor activity);GO:0005737(cytoplasm);GO:0006414(translational elongation)	NA	NA	NA	11.0254	11.7677	11.3342	12.3598	13.5235	14.4316	19.5118	18.2383	19.9415	21.1041	24.1505	24.3763	28.2844	30.3564	30.3288	1.21585e-71	5.66272e-71
Bv_000130_xgwe	blue	577.842	PREDICTED: granule-bound starch synthase 1, chloroplastic/amyloplastic [Beta vulgaris subsp. vulgaris]	GO:0004373(glycogen (starch) synthase activity);GO:0005515(protein binding);GO:0009011(starch synthase activity);GO:0009507(chloroplast);GO:0009569(chloroplast starch grain);GO:0016757(transferase activity, transferring glycosyl groups);GO:0019252(starch biosynthetic process);GO:0102502(ADP-glucose-starch glucosyltransferase activity)	00500(Starch and sucrose metabolism)	K13679	EC:2.4.1.242	0.217559	0.258767	0.400943	0.370881	0.547457	0.607445	1.18754	1.76062	0.844991	1.13819	1.50738	1.5043	3.67676	3.49115	2.92058	4.79037e-26	1.04875e-25
Bv5_116160_tdgz	blue	577.176	PREDICTED: uncharacterized protein LOC104894195 [Beta vulgaris subsp. vulgaris]	NA	NA	NA	NA	2.0397	1.81772	1.06574	1.57331	1.52235	0.816058	8.6042	8.35928	6.84136	7.23593	6.68566	7.15519	12.6907	13.7157	13.071	1.69422e-81	8.75193e-81
Bv3_051670_coxe	blue	576.474	hypothetical protein BVRB_3g051670 [Beta vulgaris subsp. vulgaris]	GO:0005515(protein binding);GO:0005634(nucleus);GO:0006355(regulation of transcription, DNA-templated);GO:0008270(zinc ion binding);GO:0009506(plasmodesma);GO:0009585(red, far-red light phototransduction);GO:0009639(response to red or far red light)	NA	NA	NA	0.599247	0.636309	0.733817	2.11874	2.40709	2.02779	1.50563	2.0824	1.94225	2.24457	1.85933	2.18444	7.36855	6.80101	6.77675	1.42573e-105	9.26042e-105
Bv5_098930_sojm	blue	576.458	PREDICTED: ethylene-responsive transcription factor ERF061 [Beta vulgaris subsp. vulgaris]	GO:0003677(DNA binding);GO:0003700(DNA binding transcription factor activity);GO:0005634(nucleus);GO:0006351(transcription, DNA-templated);GO:0006355(regulation of transcription, DNA-templated);GO:0009873(ethylene-activated signaling pathway);GO:0010200(response to chitin)	NA	NA	NA	1.30695	1.33607	1.32372	2.27235	2.66988	1.5377	4.49102	5.00487	4.8146	4.05949	3.8184	4.06353	6.62873	5.83824	5.96575	5.04236e-37	1.38413e-36
Bv9_207170_drix	blue	576.144	PREDICTED: uncharacterized protein LOC104903108 [Beta vulgaris subsp. vulgaris]	GO:0003674(molecular_function);GO:0005886(plasma membrane);GO:0009506(plasmodesma);GO:0016021(integral component of membrane);GO:0042742(defense response to bacterium)	NA	NA	NA	1195.55	1155.74	1209.08	1163.66	1130.67	1197.2	769.673	732.202	739.945	856.207	819.298	840.158	511.155	519.933	533.464	5.37622e-93	3.11273e-92
Bv7_166900_gtxg	blue	573.83	PREDICTED: uncharacterized protein LOC104899426 isoform X1 [Beta vulgaris subsp. vulgaris]	GO:0003674(molecular_function);GO:0009507(chloroplast);GO:0009793(embryo development ending in seed dormancy);GO:0061630(ubiquitin protein ligase activity)	NA	NA	NA	13.7873	15.5525	15.4589	16.5875	17.5585	16.3543	23.8857	22.2266	22.0743	30.4188	33.3464	32.3966	44.3249	44.4514	42.7065	3.87825e-95	2.30088e-94
Bv8_185070_gfyp	blue	573.801	PREDICTED: rho GDP-dissociation inhibitor 1 [Beta vulgaris subsp. vulgaris]	GO:0005094(Rho GDP-dissociation inhibitor activity);GO:0005096(GTPase activator activity);GO:0005515(protein binding);GO:0005737(cytoplasm);GO:0009932(cell tip growth);GO:0010053(root epidermal cell differentiation)	NA	NA	NA	7.78291	6.59568	9.02094	7.91488	7.96066	8.89399	12.6318	12.4015	10.7682	14.27	16.8364	13.8929	22.7951	21.625	21.5871	4.22673e-41	1.24777e-40
Bv7_173870_rsqi	blue	573.066	PREDICTED: pentatricopeptide repeat-containing protein At1g07590, mitochondrial [Beta vulgaris subsp. vulgaris]	GO:0005739(mitochondrion);GO:0046686(response to cadmium ion)	NA	NA	NA	8.51561	7.32421	8.41327	10.1783	11.0826	9.05262	27.9906	26.3375	27.2262	23.8494	27.5336	26.0399	38.2614	44.4248	36.0997	5.47201e-117	3.91899e-116
Bv3_050180_qhag	blue	572.068	non-symbiotic hemoglobin 2 [Beta vulgaris subsp. vulgaris]	GO:0005344(oxygen carrier activity);GO:0005737(cytoplasm);GO:0006631(fatty acid metabolic process);GO:0009735(response to cytokinin);GO:0015671(oxygen transport);GO:0019432(triglyceride biosynthetic process);GO:0019825(oxygen binding);GO:0020037(heme binding);GO:0046872(metal ion binding)	NA	NA	NA	3.86788	4.28656	4.28482	10.5487	10.1453	9.10736	8.1276	7.53643	6.96735	9.7118	9.94349	9.79111	18.9458	17.5214	17.9657	9.11865e-134	7.45639e-133
Bv6_150680_zizo	blue	571.878	PREDICTED: 4-coumarate--CoA ligase-like 1 isoform X2 [Beta vulgaris subsp. vulgaris];PREDICTED: 4-coumarate--CoA ligase-like 1 isoform X1 [Beta vulgaris subsp. vulgaris]	GO:0004467(long-chain fatty acid-CoA ligase activity);GO:0005515(protein binding);GO:0005524(ATP binding);GO:0005737(cytoplasm);GO:0005783(endoplasmic reticulum);GO:0010584(pollen exine formation);GO:0016207(4-coumarate-CoA ligase activity);GO:0031956(medium-chain fatty acid-CoA ligase activity);GO:0046949(fatty-acyl-CoA biosynthetic process);GO:0080110(sporopollenin biosynthetic process);GO:0080…	00360(Phenylalanine metabolism);00130(Ubiquinone and other terpenoid-quinone biosynthesis);00940(Phenylpropanoid biosynthesis);00940(Phenylpropanoid biosynthesis)	K01904	EC:6.2.1.12	0.0511434	0.0001	0.211691	0.500351	0.744747	0.566244	1.42105	1.38165	1.2655	1.29348	1.12558	1.49428	2.19505	1.69191	2.3882	7.04971e-18	1.2481e-17
Bv2_041420_uzpa	blue	571.602	hypothetical protein BVRB_2g041420 [Beta vulgaris subsp. vulgaris]	NA	NA	NA	NA	0.0676225	0.0553954	0.0913669	0.450325	0.356262	0.57898	0.460024	0.358537	0.479943	0.718258	0.692021	0.611489	1.24393	1.66408	1.32113	9.02944e-25	1.92183e-24
Bv_014770_axmu	blue	571.092	PREDICTED: cyclic nucleotide-gated ion channel 17 isoform X1 [Beta vulgaris subsp. vulgaris]	GO:0005739(mitochondrion);GO:0016197(endosomal transport);GO:0031083(BLOC-1 complex)	04626(Plant-pathogen interaction)	K05391	NA	2.3072	2.47097	2.5168	2.21206	2.50658	2.69941	3.97269	5.01056	5.04565	4.73894	4.53396	4.25715	6.81641	6.61019	6.51223	9.68008e-39	2.7437e-38
Bv8_181480_tgwz	blue	570.312	hypothetical protein BVRB_8g181480 [Beta vulgaris subsp. vulgaris]	NA	NA	NA	NA	0.0001	0.0001	0.0001	14.2031	12.2516	13.0239	8.9453	13.2384	9.18161	11.806	7.21936	10.3535	40.4497	38.1246	44.9208	6.18179e-141	5.3136e-140
Bv7_164580_swwm	blue	570.152	PREDICTED: uncharacterized protein LOC104899068 isoform X2 [Beta vulgaris subsp. vulgaris];PREDICTED: alkylated DNA repair protein alkB homolog 8 isoform X1 [Beta vulgaris subsp. vulgaris]	GO:0005634(nucleus);GO:0018126(protein hydroxylation);GO:0055114(oxidation-reduction process);GO:0055114(oxidation-reduction process)	NA	NA	NA	6.97559	5.01778	7.68927	9.40001	7.86437	7.93337	10.9672	11.714	9.0563	11.5736	10.2861	11.328	16.908	15.9229	14.8186	7.63108e-16	1.27615e-15
Bv3_060800_jzfr	blue	569.984	PREDICTED: myb-related protein 2-like isoform X2 [Beta vulgaris subsp. vulgaris];PREDICTED: myb-related protein 2-like isoform X4 [Beta vulgaris subsp. vulgaris]	GO:0003677(DNA binding);GO:0003700(DNA binding transcription factor activity);GO:0005634(nucleus);GO:0006351(transcription, DNA-templated);GO:0006355(regulation of transcription, DNA-templated);GO:0006355(regulation of transcription, DNA-templated)	04933(AGE-RAGE signaling pathway in diabetic complications);04933(AGE-RAGE signaling pathway in diabetic complications)	K06236	NA	6.38395	6.8226	7.16112	21.6115	24.8198	22.5967	25.2101	22.4518	23.8686	14.8071	14.7919	16.0403	51.5804	49.1287	48.7932	0	0
Bv5_112910_uknz	blue	569.868	PREDICTED: bidirectional sugar transporter N3 [Beta vulgaris subsp. vulgaris]	GO:0008643(carbohydrate transport);GO:0016021(integral component of membrane);GO:0051119(sugar transmembrane transporter activity)	NA	NA	NA	0.127703	0.137825	0.0602488	0.302139	0.294304	0.0925152	7.73375	7.37986	7.13716	3.43451	3.39188	3.93586	13	12.1673	12.5329	0	0
Bv8_180840_yfnz	blue	569.463	PREDICTED: 14-3-3-like protein D [Beta vulgaris subsp. vulgaris]	GO:0005509(calcium ion binding);GO:0005515(protein binding);GO:0005634(nucleus);GO:0005737(cytoplasm);GO:0005829(cytosol);GO:0005886(plasma membrane);GO:0009570(chloroplast stroma);GO:0019904(protein domain specific binding);GO:0045309(protein phosphorylated amino acid binding);GO:0048528(post-embryonic root development)	NA	NA	NA	19.8275	22.6042	23.174	31.7146	29.3129	31.4913	45.1254	46.0758	45.2446	48.8382	46.4066	45.2873	58.1632	52.1252	61.4266	1.25547e-67	5.55162e-67
Bv2_040980_izsm	blue	569.349	PREDICTED: uncharacterized protein LOC104887448 isoform X1 [Beta vulgaris subsp. vulgaris]	GO:0003674(molecular_function);GO:0005634(nucleus);GO:0008150(biological_process);GO:0008150(biological_process)	NA	NA	NA	1.93082	2.02547	2.68471	2.59106	2.77877	2.64671	3.366	3.06036	2.94426	3.23611	3.36445	3.35807	5.70682	4.61455	5.45377	1.42445e-18	2.57056e-18
Bv6_129080_jdpk	blue	567.403	PREDICTED: soluble inorganic pyrophosphatase [Beta vulgaris subsp. vulgaris]	GO:0000287(magnesium ion binding);GO:0004427(inorganic diphosphatase activity);GO:0005737(cytoplasm);GO:0005829(cytosol);GO:0006796(phosphate-containing compound metabolic process);GO:0016020(membrane);GO:0046686(response to cadmium ion)	00190(Oxidative phosphorylation)	K01507	EC:3.6.1.1	5.90447	5.8083	6.71911	7.82003	7.72545	6.96857	9.0203	9.50919	8.79235	11.9764	11.7852	11.5968	14.2988	13.9467	15.0042	4.49181e-79	2.26127e-78
Bv5_105590_rxqc	blue	567.236	PREDICTED: M-phase inducer phosphatase [Beta vulgaris subsp. vulgaris]	GO:0003674(molecular_function);GO:0005634(nucleus);GO:0008150(biological_process)	NA	NA	NA	6.35818	6.7007	7.62235	17.9189	15.171	17.5449	23.7915	25.8916	28.5902	23.0787	19.8214	22.2323	33.2196	30.033	32.4213	4.87768e-132	3.9326e-131
Bv8_197270_cziz	blue	567.208	PREDICTED: probable RNA-dependent RNA polymerase 3 [Beta vulgaris subsp. vulgaris]	GO:0003723(RNA binding);GO:0003968(RNA-directed 5'-3' RNA polymerase activity);GO:0005575(cellular_component);GO:0016441(posttranscriptional gene silencing);GO:0031047(gene silencing by RNA)	NA	NA	NA	24.8996	25.9921	27.0115	28.5759	25.5603	29.8284	44.269	35.9843	45.5926	39.8666	38.3772	37.5137	57.3353	57.9474	51.9064	2.67506e-38	7.5148e-38
Bv6_142200_hpfx	blue	567.158	PREDICTED: uncharacterized protein LOC104896525 [Beta vulgaris subsp. vulgaris]	GO:0005737(cytoplasm);GO:0006979(response to oxidative stress);GO:0015031(protein transport)	04144(Endocytosis)	K19476	NA	94.0894	95.7255	94.7795	67.6753	75.4045	70.452	81.0611	83.0397	80.9225	69.9627	68.1315	70.5317	35.5961	35.141	37.87	1.33886e-117	9.65431e-117
Bv6_132500_pceq	blue	567.085	PREDICTED: phytochrome A [Beta vulgaris subsp. vulgaris]	GO:0005634(nucleus)	04712(Circadian rhythm - plant)	K12120	NA	20.3922	17.6221	19.1939	29.6559	29.8396	29.7861	32.5532	33.054	32.704	26.2415	28.5998	28.4539	43.0176	40.4084	38.8964	7.25976e-60	2.91481e-59
Bv4_096000_kwzy	blue	565.553	hypothetical protein BVRB_4g096000 [Beta vulgaris subsp. vulgaris]	GO:0004674(protein serine/threonine kinase activity);GO:0005886(plasma membrane)	NA	NA	NA	355.029	342.704	341.993	338.589	342.735	323.843	183.83	161.081	174.162	217.883	242.827	223.858	96.7078	103.637	96.4314	1.9962e-217	2.76338e-216
Bv9_213190_uifq	blue	564.825	PREDICTED: dehydrin COR410 [Beta vulgaris subsp. vulgaris]	GO:0005829(cytosol);GO:0009414(response to water deprivation);GO:0009631(cold acclimation);GO:0009737(response to abscisic acid);GO:0016020(membrane)	NA	NA	NA	7.00224	8.23054	8.41304	15.073	13.5393	18.6149	18.7335	16.4906	18.7358	22.0465	18.0939	21.2798	26.9181	26.2461	28.8348	1.3215e-34	3.46852e-34
Bv6_140010_nnez	blue	563.761	PREDICTED: phosphatidylinositol 4-kinase gamma 7 [Beta vulgaris subsp. vulgaris]	GO:0004430(1-phosphatidylinositol 4-kinase activity);GO:0005524(ATP binding);GO:0005575(cellular_component);GO:0016301(kinase activity);GO:0016310(phosphorylation);GO:0046777(protein autophosphorylation);GO:0046854(phosphatidylinositol phosphorylation)	03008(Ribosome biogenesis in eukaryotes)	K14544	NA	155.821	147.288	153.709	310.394	318.148	309.73	251.59	273.135	267.656	247.546	250.569	241.462	540.577	541.075	547.041	3.60297e-212	4.84627e-211
Bv3_062570_gixt	blue	563.453	PREDICTED: haloacid dehalogenase-like hydrolase domain-containing protein 3 [Beta vulgaris subsp. vulgaris]	GO:0008152(metabolic process);GO:0016787(hydrolase activity)	00520(Amino sugar and nucleotide sugar metabolism)	K01097	EC:3.1.3.29	20.3489	22.0705	22.1181	37.9218	35.9954	42.3134	30.9444	35.3064	34.4937	39.999	34.3981	35.5338	58.6016	57.5263	57.6449	6.69109e-74	3.19472e-73
Bv2_033130_kiet	blue	563.289	PREDICTED: vacuolar-processing enzyme [Beta vulgaris subsp. vulgaris]	GO:0004197(cysteine-type endopeptidase activity);GO:0006624(vacuolar protein processing);GO:0051603(proteolysis involved in cellular protein catabolic process)	NA	NA	NA	4.04458	4.38019	3.69141	11.4565	11.647	11.7028	56.2408	56.739	56.8912	22.8964	20.6734	23.9999	99.3164	105.011	95.6717	0	0
Bv6_139370_pthy	blue	563.229	hypothetical protein BVRB_6g139370 isoform A [Beta vulgaris subsp. vulgaris];hypothetical protein BVRB_6g139370 isoform B [Beta vulgaris subsp. vulgaris]	GO:0003674(molecular_function);GO:0008150(biological_process);GO:0009507(chloroplast);GO:0009507(chloroplast)	NA	NA	NA	3.51768	3.62288	3.24303	5.23055	5.10767	6.04099	5.87812	6.16135	6.16416	7.30988	5.98656	6.37111	7.96791	8.13877	8.52419	9.06853e-28	2.06691e-27
Bv9_222210_oiwf	blue	563.127	PREDICTED: protein trichome birefringence-like 12 [Beta vulgaris subsp. vulgaris]	GO:0005794(Golgi apparatus);GO:0016413(O-acetyltransferase activity);GO:0071554(cell wall organization or biogenesis)	NA	NA	NA	5.31152	10.2567	6.58003	9.37339	9.89391	9.89801	13.5226	14.2083	13.9051	19.3704	18.4936	16.1061	27.331	25.5753	23.2063	5.42389e-24	1.13258e-23
Bv_006740_cugs	blue	562.969	hypothetical protein BVRB_006750 [Beta vulgaris subsp. vulgaris]	GO:0005794(Golgi apparatus);GO:0006004(fucose metabolic process);GO:0006486(protein glycosylation);GO:0016021(integral component of membrane);GO:0016757(transferase activity, transferring glycosyl groups)	NA	NA	NA	0.81765	0.827399	0.903014	0.665822	0.890328	1.30809	2.90078	5.02393	2.73524	4.6114	3.96628	4.53545	12.0289	10.5787	8.92633	2.24992e-59	8.96143e-59
Bv6_146860_dqke	blue	561.613	hypothetical protein BVRB_6g146860 [Beta vulgaris subsp. vulgaris]	GO:0005524(ATP binding);GO:0009507(chloroplast);GO:0009570(chloroplast stroma);GO:0010468(regulation of gene expression);GO:0016301(kinase activity);GO:0046777(protein autophosphorylation);GO:0080005(photosystem stoichiometry adjustment)	00760(Nicotinate and nicotinamide metabolism)	K03517	EC:2.5.1.72	12.0233	10.5289	12.0682	13.9641	16.2502	13.6063	20.7407	18.9757	17.1314	17.1254	18.2284	19.3815	23.2473	22.9429	23.1893	1.18384e-25	2.57014e-25
Bv9_206050_juqz	blue	560.875	hypothetical protein BVRB_9g206050 [Beta vulgaris subsp. vulgaris]	NA	NA	NA	NA	1.38532	0.908228	1.4036	1.69881	1.12122	1.41489	2.42199	1.73984	2.11961	2.3524	1.95076	1.68895	4.9044	4.47291	4.50089	2.1164e-10	2.9834e-10
Bv9_221890_dfpa	blue	560.495	hypothetical protein BVRB_9g221890 [Beta vulgaris subsp. vulgaris]	GO:0003700(DNA binding transcription factor activity);GO:0005634(nucleus)	00020(Citrate cycle (TCA cycle));00620(Pyruvate metabolism);00630(Glyoxylate and dicarboxylate metabolism);00710(Carbon fixation in photosynthetic organisms);00270(Cysteine and methionine metabolism)	K00026	EC:1.1.1.37	155.629	150.498	155.665	151.725	136.864	150.649	182.436	176.525	172.536	204.771	197.818	214.614	320.6	314.666	328.39	3.24475e-101	2.03847e-100
Bv1_017350_fyca	blue	559.689	PREDICTED: uncharacterized protein LOC104905235 [Beta vulgaris subsp. vulgaris]	GO:0003674(molecular_function);GO:0005634(nucleus);GO:0008150(biological_process)	NA	NA	NA	0.644829	0.74728	0.769475	4.42795	3.12161	2.67974	6.47683	8.34036	7.63507	4.18989	3.2415	3.73274	11.3092	11.3773	10.4476	9.1912e-123	6.88941e-122
Bv3_051050_qrsy	blue	558.5	PREDICTED: two-component response regulator-like APRR5 isoform X1 [Beta vulgaris subsp. vulgaris];PREDICTED: two-component response regulator-like APRR5 isoform X2 [Beta vulgaris subsp. vulgaris]	GO:0000156(phosphorelay response regulator activity);GO:0000160(phosphorelay signal transduction system);GO:0003677(DNA binding);GO:0005515(protein binding);GO:0005634(nucleus);GO:0006351(transcription, DNA-templated);GO:0006355(regulation of transcription, DNA-templated);GO:0007623(circadian rhythm);GO:0009266(response to temperature stimulus);GO:0010017(red or far-red light signaling pathway);G…	04712(Circadian rhythm - plant);04712(Circadian rhythm - plant)	K12130	NA	10.2797	9.42773	9.63595	45.9167	44.8483	46.6896	36.1937	37.2928	37.8775	27.809	32.8583	27.2378	93.1548	91.956	97.5704	0	0
Bv5_121020_znma	blue	558.403	PREDICTED: 2'-deoxymugineic-acid 2'-dioxygenase [Beta vulgaris subsp. vulgaris]	GO:0051213(dioxygenase activity)	NA	NA	NA	7.87331	7.86029	8.21985	17.362	17.2788	16.4724	22.0645	23.1058	23.5573	16.8168	16.4178	15.8615	27.7518	26.8512	27.5931	5.06273e-200	6.3675e-199
Bv4_079650_igus	blue	558.16	PREDICTED: E3 ubiquitin-protein ligase hel2-like isoform X2 [Beta vulgaris subsp. vulgaris]	GO:0003729(mRNA binding);GO:0005634(nucleus);GO:0008270(zinc ion binding)	NA	NA	NA	26.1116	22.8883	27.7116	36.3875	32.8249	32.1781	39.8872	40.2238	42.2684	31.3068	33.6929	31.6613	52.6019	50.6381	50.9556	6.72401e-46	2.15493e-45
Bv8_200340_keeq	blue	558.156	hypothetical protein BVRB_8g200340 [Beta vulgaris subsp. vulgaris]	NA	NA	NA	NA	3.00953	3.73831	3.95038	49.9412	43.7117	55.9111	43.3376	42.1926	55.77	48.6099	39.0432	53.3487	88.9413	82.6771	92.0739	9.59529e-207	1.25333e-205
Bv5_100450_ygei	blue	558.048	PREDICTED: glutathione S-transferase T1 isoform X1 [Beta vulgaris subsp. vulgaris]	GO:0004364(glutathione transferase activity);GO:0005737(cytoplasm);GO:0006749(glutathione metabolic process)	00480(Glutathione metabolism)	K00799	EC:2.5.1.18	0.24356	0.135318	0.0001	1.71597	2.082	1.64938	3.18796	1.83729	2.1358	0.9044	1.9368	1.48364	5.83791	6.04635	7.08293	2.02763e-33	5.21865e-33
Bv7_176200_oprx	blue	556.566	PREDICTED: CEN-like protein 2 [Beta vulgaris subsp. vulgaris]	GO:0005634(nucleus);GO:0005737(cytoplasm);GO:0008429(phosphatidylethanolamine binding);GO:0009910(negative regulation of flower development);GO:0010228(vegetative to reproductive phase transition of meristem)	04712(Circadian rhythm - plant)	K16223	NA	0.288594	0.419988	0.151205	0.429392	0.170153	0.0001	5.79725	4.76686	5.93757	4.09591	3.67954	4.25774	28.0183	26.6185	28.3613	4.95953e-269	8.8382e-268
Bv2_024350_mxhh	blue	556.56	hypothetical protein BVRB_2g024350 [Beta vulgaris subsp. vulgaris]	GO:0003674(molecular_function);GO:0005634(nucleus);GO:0008150(biological_process)	NA	NA	NA	7.102	5.24068	5.78048	11.4913	9.65803	8.59197	8.98936	13.0276	13.5533	13.8068	14.68	14.8733	22.069	18.985	23.9204	9.51449e-28	2.16725e-27
Bv9_214630_fnpa	blue	555.172	PREDICTED: transcription factor bHLH121 [Beta vulgaris subsp. vulgaris]	GO:0003677(DNA binding);GO:0003700(DNA binding transcription factor activity);GO:0005515(protein binding);GO:0005634(nucleus);GO:0006351(transcription, DNA-templated);GO:0006355(regulation of transcription, DNA-templated);GO:0043565(sequence-specific DNA binding);GO:0046983(protein dimerization activity)	NA	NA	NA	21.3044	17.4609	20.3292	192.322	183.829	205.036	160.34	149.991	151.933	199.343	185.882	204.612	326.267	313.665	330.796	0	0
Bv7_177620_jcem	blue	554.904	PREDICTED: KH domain-containing protein HEN4 [Beta vulgaris subsp. vulgaris]	GO:0003676(nucleic acid binding);GO:0003723(RNA binding)	NA	NA	NA	30.4112	31.6623	34.5668	35.1384	41.974	38.8556	43.6291	41.0882	45.7696	61.5725	59.7439	63.8128	80.1736	82.3372	87.9684	1.143e-71	5.32476e-71
Bv_006870_yzgj	blue	554.403	PREDICTED: uncharacterized acetyltransferase At3g50280 [Beta vulgaris subsp. vulgaris]	GO:0005737(cytoplasm);GO:0016740(transferase activity);GO:0016747(transferase activity, transferring acyl groups other than amino-acyl groups)	NA	NA	NA	2.04183	2.02473	2.22408	12.8494	12.431	12.8727	13.2414	11.5383	13.0612	18.3606	16.7238	17.9418	23.7015	23.3062	24.2511	1e-295	2.0913e-294
Bv1_006060_daft	blue	554.088	PREDICTED: uncharacterized protein LOC104888756 isoform X1 [Beta vulgaris subsp. vulgaris]	GO:0006664(glycolipid metabolic process);GO:0012505(endomembrane system);GO:0046527(glucosyltransferase activity)	00514(Other types of O-glycan biosynthesis)	K13667	EC:2.4.1.-	1.68248	1.11451	0.863975	1.21536	1.63245	1.74755	1.82536	2.45297	2.5754	4.69479	4.10374	4.83272	9.07247	8.33847	8.1345	2.10399e-41	6.24127e-41
Bv7_158360_cnni	blue	553.816	hypothetical protein BVRB_7g158360 [Beta vulgaris subsp. vulgaris]	GO:0005515(protein binding);GO:0005634(nucleus);GO:0006351(transcription, DNA-templated);GO:0045892(negative regulation of transcription, DNA-templated)	NA	NA	NA	9.6605	10.0067	10.4178	15.1967	11.9527	14.3425	12.0706	15.4473	14.6347	13.2329	13.8618	13.6258	24.1141	21.561	23.2817	5.71756e-20	1.07418e-19
Bv3_054160_ywua	blue	553.157	PREDICTED: inactive protein RESTRICTED TEV MOVEMENT 1 [Beta vulgaris subsp. vulgaris]	NA	NA	NA	NA	10.8045	10.1974	10.4679	14.5685	12.5821	14.4908	14.0626	12.7237	12.5994	18.5243	17.0467	17.8004	27.0346	23.6619	25.4234	1.55601e-68	6.97648e-68
Bv3_054000_tzah	blue	552.948	PREDICTED: jasmonate-induced protein homolog [Beta vulgaris subsp. vulgaris]	NA	NA	NA	NA	138.383	125.281	130.781	114.495	122.191	119.942	217.727	197.6	204.172	228.379	221.762	223.232	292.417	296.459	296.422	9.63994e-146	8.48198e-145
Bv7_173690_xmim	blue	552.188	hypothetical protein BVRB_7g173690 [Beta vulgaris subsp. vulgaris]	NA	NA	NA	NA	17.6477	19.2872	18.7835	25.1361	18.4853	23.5517	36.3955	34.0954	34.4581	29.7053	28.6176	25.4808	46.0668	40.184	44.8442	1.84732e-39	5.30013e-39
Bv9_207581z3117	blue	552.107	hypothetical protein BVRB_7g164540 [Beta vulgaris subsp. vulgaris]	NA	NA	NA	NA	3.122	4.61183	4.0597	20.9121	20.4401	27.9895	46.6723	52.299	63.5088	43.6753	39.2868	48.2826	65.3935	67.5403	75.1767	7.90975e-163	7.91351e-162
Bv2_041000_dwtw	blue	551.679	PREDICTED: uncharacterized protein LOC104887451 [Beta vulgaris subsp. vulgaris]	GO:0003674(molecular_function);GO:0009507(chloroplast);GO:0010190(cytochrome b6f complex assembly);GO:0042651(thylakoid membrane)	NA	NA	NA	0.284577	0.399111	0.350671	0.662403	0.526214	0.485465	1.09528	1.17202	1.15491	1.0642	0.861237	0.964362	1.84645	1.30364	1.61713	3.06329e-19	5.63901e-19
Bv_003420_suqa	blue	551.244	hypothetical protein BVRB_003420 [Beta vulgaris subsp. vulgaris]	GO:0005634(nucleus);GO:0008150(biological_process);GO:0046872(metal ion binding)	00360(Phenylalanine metabolism);00940(Phenylpropanoid biosynthesis);00945(Stilbenoid, diarylheptanoid and gingerol biosynthesis);00941(Flavonoid biosynthesis)	K00588	EC:2.1.1.104	8.19668	7.45875	8.75155	10.553	9.68103	9.25616	9.61412	9.77788	9.572	13.1357	12.9514	10.3302	20.5056	19.8783	20.502	4.1111e-50	1.41426e-49
Bv9_218280_hxny	blue	551.011	hypothetical protein BVRB_9g218280 [Beta vulgaris subsp. vulgaris]	NA	NA	NA	NA	1.72708	0.942955	0.935152	286.846	276.508	290.334	159.834	186.411	199.697	185.238	170.457	187.732	599.687	547.191	608.411	0	0
Bv9_219100_wute	blue	550.472	PREDICTED: protein NUCLEAR FUSION DEFECTIVE 4 isoform X1 [Beta vulgaris subsp. vulgaris]	GO:0003674(molecular_function);GO:0005634(nucleus);GO:0016021(integral component of membrane);GO:0080167(response to karrikin)	NA	NA	NA	3.23874	3.40414	5.9156	6.86456	9.1235	7.42531	8.89356	5.37475	8.53615	9.42152	10.6781	8.9461	16.6181	18.6676	17.9975	1.86364e-17	3.26323e-17
Bv7_171400_fise	blue	550.451	PREDICTED: fasciclin-like arabinogalactan protein 17 [Beta vulgaris subsp. vulgaris]	GO:0003674(molecular_function);GO:0005576(extracellular region);GO:0005773(vacuole);GO:0007155(cell adhesion)	NA	NA	NA	366.5	345.393	359.105	312.23	302.556	312.774	223.145	230.839	234.782	313.201	324.048	319.248	135.076	136.107	128.591	2.35763e-151	2.17951e-150
Bv1_015520_tiyg	blue	550.378	hypothetical protein BVRB_1g015520 [Beta vulgaris subsp. vulgaris]	NA	NA	NA	NA	55.7586	55.0157	52.8917	44.2364	39.3677	38.0691	32.8997	20.3244	20.5996	29.1689	26.863	28.6087	13.573	13.4985	12.163	9.92574e-49	3.33712e-48
Bv6_130610_wodd	blue	550.244	PREDICTED: DNA-(apurinic or apyrimidinic site) lyase 2 [Beta vulgaris subsp. vulgaris];hypothetical protein BVRB_6g130610 isoform B [Beta vulgaris subsp. vulgaris]	GO:0003906(DNA-(apurinic or apyrimidinic site) lyase activity);GO:0005634(nucleus);GO:0006284(base-excision repair);GO:0008311(double-stranded DNA 3'-5' exodeoxyribonuclease activity);GO:0008311(double-stranded DNA 3'-5' exodeoxyribonuclease activity)	03410(Base excision repair);03410(Base excision repair)	K10772	EC:4.2.99.18	5.05496	4.09421	4.95555	4.49915	3.93689	3.84856	7.49272	8.23164	7.5557	7.29233	8.0334	8.68217	12.1585	11.2523	12.057	4.76683e-39	1.35616e-38
Bv_012410_scnx	blue	550.16	PREDICTED: VAN3-binding protein [Beta vulgaris subsp. vulgaris]	GO:0005634(nucleus);GO:0007165(signal transduction);GO:0009734(auxin-activated signaling pathway);GO:0016021(integral component of membrane);GO:0035091(phosphatidylinositol binding)	NA	NA	NA	11.3741	12.4184	10.9149	12.9848	12.3187	11.524	23.3232	23.6089	22.7833	30.334	25.2337	28.283	36.4802	34.8616	36.0216	2.18504e-102	1.38556e-101
Bv5_125390_gcix	blue	550.16	PREDICTED: cyclic dof factor 2 [Beta vulgaris subsp. vulgaris]	GO:0000978(RNA polymerase II proximal promoter sequence-specific DNA binding);GO:0003677(DNA binding);GO:0003700(DNA binding transcription factor activity);GO:0005515(protein binding);GO:0005634(nucleus);GO:0006351(transcription, DNA-templated);GO:0006355(regulation of transcription, DNA-templated);GO:0009658(chloroplast organization);GO:0009908(flower development);GO:0010228(vegetative to reprod…	04712(Circadian rhythm - plant)	K16222	NA	4.44748	3.96048	4.27356	7.6641	8.41498	9.05837	8.25336	8.78833	7.94971	6.01081	6.19743	6.98607	14.3455	14.3542	13.7229	3.72985e-54	1.36658e-53
Bv1_004120_ydqo	blue	550.125	PREDICTED: sphingoid long-chain bases kinase 2, mitochondrial [Beta vulgaris subsp. vulgaris]	GO:0003951(NAD+ kinase activity);GO:0004143(diacylglycerol kinase activity);GO:0005524(ATP binding);GO:0005737(cytoplasm);GO:0005739(mitochondrion);GO:0006671(phytosphingosine metabolic process);GO:0007205(protein kinase C-activating G-protein coupled receptor signaling pathway);GO:0009409(response to cold);GO:0016310(phosphorylation);GO:0017050(D-erythro-sphingosine kinase activity)	00600(Sphingolipid metabolism)	K04718	EC:2.7.1.91	12.8555	10.8295	11.4971	14.8974	16.1672	14.8666	17.8663	15.6021	15.9938	19.9635	19.5655	20.0772	24.4967	26.1215	22.3621	4.82032e-24	1.00743e-23
Bv6_141260_tdrh	blue	550.004	PREDICTED: uncharacterized protein At1g26090, chloroplastic [Beta vulgaris subsp. vulgaris]	GO:0005524(ATP binding);GO:0009507(chloroplast);GO:0010287(plastoglobule)	NA	NA	NA	3.52861	3.72534	4.88475	4.69489	4.42971	4.77475	5.13616	5.91889	4.93765	6.41504	6.17954	6.42333	11.7121	9.55323	10.1784	1.61574e-21	3.16429e-21
Bv_004640_hkho	blue	549.805	PREDICTED: FBD-associated F-box protein At4g10400-like [Beta vulgaris subsp. vulgaris]	GO:0003674(molecular_function);GO:0005634(nucleus);GO:0048579(negative regulation of long-day photoperiodism, flowering);GO:0048587(regulation of short-day photoperiodism, flowering);GO:2000028(regulation of photoperiodism, flowering)	NA	NA	NA	2.31425	2.29735	1.80498	2.17893	2.64088	2.36949	3.60121	3.01211	3.06061	3.5754	3.72322	3.77183	6.14472	4.87848	5.10775	5.31327e-23	1.08117e-22
Bv3_064000_zyst	blue	549.779	hypothetical protein BVRB_3g064000 [Beta vulgaris subsp. vulgaris]	GO:0005515(protein binding);GO:0005524(ATP binding);GO:0005576(extracellular region);GO:0006952(defense response);GO:0043531(ADP binding)	04016(MAPK signaling pathway - plant);04075(Plant hormone signal transduction)	K14497	EC:3.1.3.16	31.8232	33.7859	27.3508	46.0784	44.3248	43.3631	241.525	227.819	228.084	164.378	180.124	178.164	300.666	305.79	292.21	0	0
Bv3_054910_zmii	blue	549.595	hypothetical protein BVRB_3g054910 [Beta vulgaris subsp. vulgaris]	NA	NA	NA	NA	0.404339	0.491939	0.522879	3.03993	2.5076	2.49753	3.47028	3.85205	3.84424	1.99812	1.2533	1.31897	7.9688	8.43341	7.83622	7.90782e-107	5.19137e-106
Bv1_011170_esfn	blue	548.991	PREDICTED: uncharacterized protein LOC104895484 isoform X1 [Beta vulgaris subsp. vulgaris]	NA	NA	NA	NA	18.2907	15.9368	16.6581	14.2473	13.9557	13.1653	10.5223	12.2134	10.6367	14.967	14.5787	14.5465	4.48768	2.15231	1.9025	1.22782e-33	3.16959e-33
Bv5_125770_kxha	blue	548.917	hypothetical protein BVRB_5g125770 [Beta vulgaris subsp. vulgaris]	NA	NA	NA	NA	16.5505	16.11	17.0164	11.8785	10.6315	11.1489	26.2406	24.8604	26.1267	29.018	24.0969	26.8813	64.79	62.3886	64.9913	0	0
Bv7_175650_ghuk	blue	548.108	PREDICTED: biogenesis of lysosome-related organelles complex 1 subunit 1 [Beta vulgaris subsp. vulgaris]	GO:0005739(mitochondrion);GO:0016197(endosomal transport);GO:0031083(BLOC-1 complex)	NA	NA	NA	6.04693	5.55582	5.06664	13.8847	9.29532	10.3837	15.4153	15.7292	16.9346	15.9064	12.0157	13.8915	21.4546	19.4186	20.4485	6.96641e-31	1.70008e-30
Bv9_223160_kwcd	blue	547.934	PREDICTED: probable protein phosphatase 2C 28 isoform X3 [Beta vulgaris subsp. vulgaris];PREDICTED: probable protein phosphatase 2C 39 isoform X1 [Beta vulgaris subsp. vulgaris];hypothetical protein BVRB_9g223160 isoform B [Beta vulgaris subsp. vulgaris]	GO:0004722(protein serine/threonine phosphatase activity);GO:0005575(cellular_component);GO:0006470(protein dephosphorylation);GO:0046872(metal ion binding);GO:0046872(metal ion binding)	NA	NA	NA	0.688958	0.736998	0.225767	3.38089	1.59129	2.18324	3.95315	4.89881	5.27544	3.18171	3.77375	3.34582	11.3027	9.62743	14.6135	4.75679e-36	1.28092e-35
Bv4_093100_ecgu	blue	547.902	PREDICTED: cytochrome c-type biogenesis ccda-like chloroplastic protein isoform X2 [Beta vulgaris subsp. vulgaris];PREDICTED: cytochrome c-type biogenesis ccda-like chloroplastic protein isoform X1 [Beta vulgaris subsp. vulgaris]	GO:0005887(integral component of plasma membrane);GO:0009055(electron transfer activity);GO:0015035(protein disulfide oxidoreductase activity);GO:0017004(cytochrome complex assembly);GO:0045454(cell redox homeostasis);GO:0045454(cell redox homeostasis)	NA	NA	NA	2.28814	1.89227	2.16617	2.81681	1.66495	2.37881	4.57234	3.99487	4.60154	4.11368	3.34356	3.30048	6.0599	5.95646	6.73287	1.12665e-26	2.50296e-26
Bv_009870_fkkk	blue	547.145	hypothetical protein BVRB_009870 [Beta vulgaris subsp. vulgaris]	GO:0005515(protein binding);GO:0005737(cytoplasm);GO:0005829(cytosol);GO:0009809(lignin biosynthetic process);GO:0009963(positive regulation of flavonoid biosynthetic process);GO:0010252(auxin homeostasis);GO:0016020(membrane);GO:0016740(transferase activity);GO:0047172(shikimate O-hydroxycinnamoyltransferase activity);GO:0047205(quinate O-hydroxycinnamoyltransferase activity);GO:0071555(cell wal…	00940(Phenylpropanoid biosynthesis);00945(Stilbenoid, diarylheptanoid and gingerol biosynthesis);00941(Flavonoid biosynthesis)	K13065	EC:2.3.1.133	0.949014	0.505309	0.819059	1.48829	2.16292	1.2992	2.68644	1.39411	2.47999	4.85439	4.17704	4.61039	12.922	14.9561	15.5141	1.16904e-79	5.92289e-79
Bv6_151970_gufi	blue	547.143	PREDICTED: transcription factor ICE1 [Beta vulgaris subsp. vulgaris]	GO:0003677(DNA binding);GO:0003700(DNA binding transcription factor activity);GO:0005515(protein binding);GO:0005634(nucleus);GO:0006351(transcription, DNA-templated);GO:0009409(response to cold);GO:0010440(stomatal lineage progression);GO:0045893(positive regulation of transcription, DNA-templated);GO:0046983(protein dimerization activity);GO:0050826(response to freezing)	00040(Pentose and glucuronate interconversions);00053(Ascorbate and aldarate metabolism);00520(Amino sugar and nucleotide sugar metabolism)	K16190	EC:2.7.1.43	6.16331	6.74011	6.72653	14.8419	13.4909	13.5509	13.7102	10.7953	11.8488	13.1117	13.455	14.4042	21.2846	19.3434	21.0795	1.17062e-40	3.43387e-40
Bv6_129940_nmnx	blue	547.118	PREDICTED: histone H1 [Beta vulgaris subsp. vulgaris]	GO:0000786(nucleosome);GO:0003677(DNA binding);GO:0005634(nucleus);GO:0006334(nucleosome assembly);GO:0009414(response to water deprivation);GO:0031492(nucleosomal DNA binding)	NA	NA	NA	23.6974	23.5902	24.1019	181.823	188.749	182.803	163.591	175.906	177.113	94.3488	90.6942	91.114	506.79	504.337	509.714	0	0
Bv1_021750_dpmd	blue	546.815	PREDICTED: uncharacterized protein LOC104905738 [Beta vulgaris subsp. vulgaris]	GO:0003674(molecular_function);GO:0005634(nucleus);GO:0008150(biological_process)	NA	NA	NA	16.1977	17.1464	17.1062	24.4351	23.5335	24.2859	22.0009	24.7356	25.3118	38.0692	34.5036	36.5259	50.9407	45.6852	51.2336	3.29288e-108	2.19822e-107
Bv6_134830_hkxa	blue	546.8	PREDICTED: uncharacterized protein LOC104895648 isoform X2 [Beta vulgaris subsp. vulgaris];PREDICTED: uncharacterized protein LOC104895648 isoform X1 [Beta vulgaris subsp. vulgaris]	GO:0003674(molecular_function);GO:0003674(molecular_function)	NA	NA	NA	3.16446	2.20937	2.5117	3.66984	2.81684	3.04264	4.23431	4.06944	4.26309	4.04682	4.11116	4.26832	5.43405	5.26573	5.09828	2.77142e-10	3.88872e-10
Bv3_070340_kzap	blue	546.4	PREDICTED: CBL-interacting serine/threonine-protein kinase 1 isoform X1 [Beta vulgaris subsp. vulgaris]	GO:0004674(protein serine/threonine kinase activity);GO:0005634(nucleus);GO:0005737(cytoplasm);GO:0006468(protein phosphorylation);GO:0035556(intracellular signal transduction)	NA	NA	NA	89.4831	90.2571	97.4956	55.7748	51.5182	54.5092	62.5768	59.2068	63.3019	55.6262	53.372	53.7478	25.7286	27.8658	25.5208	1.0115e-175	1.09636e-174
Bv7_165170_gttx	blue	546.362	PREDICTED: uncharacterized protein LOC104899184 [Beta vulgaris subsp. vulgaris]	GO:0003674(molecular_function);GO:0008150(biological_process)	NA	NA	NA	0.230298	0.188103	0.268198	1.64656	2.19993	2.11506	4.19268	4.67186	4.39843	2.45633	2.42106	1.60693	6.56373	5.89952	8.00129	1.6229e-60	6.58002e-60
Bv4_094240_texx	blue	546.34	PREDICTED: 9-cis-epoxycarotenoid dioxygenase NCED1, chloroplastic [Beta vulgaris subsp. vulgaris]	GO:0006970(response to osmotic stress);GO:0009414(response to water deprivation);GO:0009507(chloroplast);GO:0009535(chloroplast thylakoid membrane);GO:0009570(chloroplast stroma);GO:0009688(abscisic acid biosynthetic process);GO:0042538(hyperosmotic salinity response);GO:0045549(9-cis-epoxycarotenoid dioxygenase activity);GO:0046872(metal ion binding);GO:0055114(oxidation-reduction process)	00906(Carotenoid biosynthesis)	K09840	EC:1.13.11.51	9.91129	9.22747	10.8545	10.2781	9.53551	9.43295	13.3937	16.4815	14.4012	12.95	14.4591	12.9004	30.4567	33.2084	29.7855	6.99698e-92	4.00349e-91
Bv2_024910_ctdp	blue	546.309	PREDICTED: factor of DNA methylation 1 isoform X2 [Beta vulgaris subsp. vulgaris]	GO:0004526(ribonuclease P activity);GO:0005655(nucleolar ribonuclease P complex);GO:0090502(RNA phosphodiester bond hydrolysis, endonucleolytic)	NA	NA	NA	7.29295	10.0762	10.6525	12.4362	12.8191	11.2673	16.3008	13.4734	16.2109	15.7859	14.1821	15.1022	20.5434	20.8074	18.5241	4.39902e-14	6.96379e-14
Bv1_017640_zayf	blue	546.247	PREDICTED: uncharacterized protein LOC104890737 [Beta vulgaris subsp. vulgaris]	NA	NA	NA	NA	1.02618	1.176	0.902115	1.8763	1.88157	2.27414	2.01054	1.71906	2.57373	1.49736	2.35836	1.78977	4.15242	4.5893	4.44621	1.30835e-16	2.23584e-16
Bv3_065810_mqqh	blue	545.949	PREDICTED: TBC1 domain family member 13 [Beta vulgaris subsp. vulgaris]	GO:0005096(GTPase activator activity);GO:0005622(intracellular);GO:0006886(intracellular protein transport);GO:0012505(endomembrane system);GO:0017137(Rab GTPase binding);GO:0031338(regulation of vesicle fusion);GO:0090630(activation of GTPase activity)	NA	NA	NA	17.4297	15.7142	15.542	24.3033	25.7151	26.6039	25.3762	25.5728	23.5102	21.3338	23.941	22.4228	34.3664	37.6431	34.0523	6.58563e-52	2.3284e-51
Bv1_020730_kkns	blue	545.924	hypothetical protein BVRB_1g020730 [Beta vulgaris subsp. vulgaris]	GO:0030599(pectinesterase activity);GO:0046910(pectinesterase inhibitor activity);GO:0071944(cell periphery)	00040(Pentose and glucuronate interconversions)	K01051	EC:3.1.1.11	16.0143	13.3974	14.6869	193.937	187.394	188.711	409.454	395.996	408.532	204.808	203.47	219.403	502.142	464.801	498.676	0	0
Bv6_130540_zmud	blue	545.439	PREDICTED: cold shock domain-containing protein 3 [Beta vulgaris subsp. vulgaris]	GO:0003676(nucleic acid binding);GO:0003677(DNA binding);GO:0003729(mRNA binding);GO:0005515(protein binding);GO:0005634(nucleus);GO:0005737(cytoplasm);GO:0006355(regulation of transcription, DNA-templated);GO:0008270(zinc ion binding);GO:0009409(response to cold);GO:0009631(cold acclimation);GO:0009826(unidimensional cell growth);GO:0032508(DNA duplex unwinding)	NA	NA	NA	13.1026	11.7949	12.4901	33.1472	33.2797	33.3699	41.5887	39.3361	42.8065	26.7263	23.4374	27.4821	56.5884	62.915	55.9221	4.64309e-159	4.54467e-158
Bv5_116520_zsze	blue	545.193	PREDICTED: protease Do-like 9 isoform X1 [Beta vulgaris subsp. vulgaris]	GO:0004252(serine-type endopeptidase activity);GO:0005730(nucleolus);GO:0005739(mitochondrion);GO:0006508(proteolysis);GO:0008236(serine-type peptidase activity);GO:0009507(chloroplast)	03018(RNA degradation)	K12614	EC:3.6.4.13	211.953	196.721	196.045	166.842	161.193	165.991	84.037	80.5465	79.2694	63.1627	62.7855	69.3818	28.1946	27.8024	27.7743	0	0
Bv5_108580_jypk	blue	545.03	PREDICTED: syntaxin-121 [Beta vulgaris subsp. vulgaris]	GO:0000149(SNARE binding);GO:0005484(SNAP receptor activity);GO:0005886(plasma membrane);GO:0006886(intracellular protein transport);GO:0006887(exocytosis);GO:0006906(vesicle fusion);GO:0012505(endomembrane system);GO:0016021(integral component of membrane);GO:0031201(SNARE complex);GO:0048278(vesicle docking)	04130(SNARE interactions in vesicular transport)	K08486	NA	808.244	813.142	821.557	757.266	756.311	811.318	635.152	631.079	670.687	491.974	466.978	502.653	349.637	339.756	350.571	6.40286e-94	3.74483e-93
Bv5_101700_stoc	blue	545.017	PREDICTED: uncharacterized protein LOC104892404 [Beta vulgaris subsp. vulgaris]	GO:0003674(molecular_function);GO:0008150(biological_process);GO:0016021(integral component of membrane)	NA	NA	NA	11.8364	9.80855	9.35549	17.0878	14.3774	12.7187	15.0063	14.5529	13.4765	17.5477	16.5444	15.895	22.7288	26.2653	24.6362	3.16186e-26	6.94869e-26
Bv7_176890_nhfn	blue	544.855	PREDICTED: protein STICHEL-like 2 [Beta vulgaris subsp. vulgaris]	GO:0003689(DNA clamp loader activity);GO:0005663(DNA replication factor C complex);GO:0006261(DNA-dependent DNA replication)	NA	NA	NA	10.2137	10.1097	9.59193	12.2207	10.1314	10.0199	12.129	13.5081	14.0898	18.4619	21.4016	21.1015	33.1392	35.4489	38.3957	3.08326e-73	1.45892e-72
Bv4_072600_tpih	blue	544.229	PREDICTED: uncharacterized protein LOC104889981 isoform X1 [Beta vulgaris subsp. vulgaris]	GO:0002143(tRNA wobble position uridine thiolation)	NA	NA	NA	9.52345	8.94458	10.132	13.119	11.958	15.7761	13.2911	16.4433	16.0648	15.2843	15.8954	15.1041	21.3468	19.3288	20.8635	4.75617e-19	8.70383e-19
Bv1_019350_wsen	blue	544.147	PREDICTED: probable calcium-binding protein CML23 [Beta vulgaris subsp. vulgaris]	GO:0005509(calcium ion binding)	04626(Plant-pathogen interaction)	K13448	NA	0.214161	0.238313	0.0386068	4.4132	4.92595	4.31675	2.34345	2.40204	2.35767	4.14427	3.36749	4.22525	13.6476	12.484	11.3916	5.16781e-187	6.0098e-186
Bv6_136310_dafd	blue	544.031	PREDICTED: uncharacterized protein LOC104895772 [Beta vulgaris subsp. vulgaris]	GO:0003674(molecular_function);GO:0005575(cellular_component);GO:0042274(ribosomal small subunit biogenesis)	NA	NA	NA	4.53359	4.01658	5.73618	6.65106	6.33946	7.85826	6.69254	6.41345	7.80113	9.94519	8.94261	8.63266	14.1916	12.0324	14.0987	6.16325e-24	1.28541e-23
Bv3_058130_qhpi	blue	543.424	PREDICTED: wall-associated receptor kinase 2-like [Beta vulgaris subsp. vulgaris]	GO:0004674(protein serine/threonine kinase activity);GO:0005886(plasma membrane);GO:0007166(cell surface receptor signaling pathway)	NA	NA	NA	18.826	18.8546	19.3129	10.7158	10.6034	10.3018	10.32	9.88185	10.1229	7.34538	7.65322	7.48932	3.31399	3.17319	3.49373	5.61389e-291	1.11101e-289
Bv6_127820_ixrf	blue	543.171	hypothetical protein BVRB_6g127830 [Beta vulgaris subsp. vulgaris];PREDICTED: uncharacterized protein At2g23090 [Beta vulgaris subsp. vulgaris]	GO:0003674(molecular_function);GO:0008150(biological_process);GO:0008150(biological_process)	NA	NA	NA	0.692104	0.595267	0.557128	2.66508	2.50055	2.05177	3.64381	2.87374	2.94673	1.8808	2.12242	1.50395	4.78164	5.1106	5.72979	2.45135e-73	1.16136e-72
Bv2_027780_rcgr	blue	542.826	PREDICTED: U-box domain-containing protein 4 isoform X1 [Beta vulgaris subsp. vulgaris]	GO:0005634(nucleus);GO:0005737(cytoplasm)	NA	NA	NA	5.55083	4.85415	4.9384	9.10094	9.42734	8.92023	8.96355	8.53504	8.95298	6.82181	7.2947	7.95902	13.055	12.9893	13.0696	2.32278e-71	1.07917e-70
Bv3_060180_zcmm	blue	542.67	hypothetical protein BVRB_3g060180 [Beta vulgaris subsp. vulgaris]	NA	NA	NA	NA	0.0001	0.0001	0.11068	0.0001	0.0001	0.0001	0.695736	0.480206	0.729385	0.342198	0.199812	0.445453	1.67082	1.6077	1.35926	3.46647e-22	6.90783e-22
Bv5_117580_hfga	blue	542.621	PREDICTED: plant UBX domain-containing protein 10 [Beta vulgaris subsp. vulgaris]	GO:0005737(cytoplasm);GO:0005886(plasma membrane);GO:0008150(biological_process)	NA	NA	NA	6.69533	6.49806	7.11519	8.98447	8.53875	9.68146	15.1999	11.6668	12.4683	14.2329	12.2898	14.0936	16.55	16.664	16.9264	2.72346e-32	6.85615e-32
Bv3_060521z779	blue	542.055	PREDICTED: uncharacterized protein LOC104900404 [Beta vulgaris subsp. vulgaris]	GO:0003676(nucleic acid binding);GO:0003964(RNA-directed DNA polymerase activity);GO:0005739(mitochondrion);GO:0008150(biological_process)	00500(Starch and sucrose metabolism);00460(Cyanoamino acid metabolism);00940(Phenylpropanoid biosynthesis)	K01188	EC:3.2.1.21	0.0001	0.0626227	0.0001	0.341273	0.06257	0.0001	0.0569592	0.488873	0.281535	0.771935	0.646515	0.544122	1.89764	2.12034	2.14093	1.46339e-10	2.07375e-10
Bv6_130630_prrx	blue	541.994	PREDICTED: calcium-dependent protein kinase 18 [Beta vulgaris subsp. vulgaris]	GO:0004683(calmodulin-dependent protein kinase activity);GO:0005516(calmodulin binding);GO:0005634(nucleus);GO:0005737(cytoplasm);GO:0005886(plasma membrane);GO:0009738(abscisic acid-activated signaling pathway);GO:0009931(calcium-dependent protein serine/threonine kinase activity);GO:0018105(peptidyl-serine phosphorylation);GO:0035556(intracellular signal transduction);GO:0046777(protein autopho…	04626(Plant-pathogen interaction)	K13412	EC:2.7.11.1	463.736	464.547	485.507	387.805	386.376	391.492	220.082	232.626	233.386	373.666	378.858	372.927	151.372	151.121	150.342	6.84548e-165	6.95133e-164
Bv9_213700_cnmu	blue	541.969	PREDICTED: uncharacterized protein LOC104903892 [Beta vulgaris subsp. vulgaris]	NA	NA	NA	NA	3.4618	4.61073	4.24116	1.99558	1.71948	1.72651	12.1704	14.6308	9.80248	15.9714	16.345	17.863	33.3153	27.6392	28.7042	1.06477e-104	6.88291e-104
Bv6_129290_kgao	blue	541.287	PREDICTED: AAA-ATPase At3g50940-like isoform X2 [Beta vulgaris subsp. vulgaris]	GO:0005524(ATP binding);GO:0005886(plasma membrane);GO:0009651(response to salt stress);GO:0016887(ATPase activity)	NA	NA	NA	27.4326	26.3203	28.0384	43.6299	41.7829	46.4458	34.738	34.5114	39.1617	45.6843	38.5813	40.4911	75.706	71.7519	78.7073	1.15128e-91	6.56752e-91
Bv5_116660_qihk	blue	541.276	PREDICTED: RNA-dependent RNA polymerase 2 [Beta vulgaris subsp. vulgaris]	GO:0003723(RNA binding);GO:0003968(RNA-directed 5'-3' RNA polymerase activity);GO:0005515(protein binding);GO:0005634(nucleus);GO:0005654(nucleoplasm);GO:0005730(nucleolus);GO:0009751(response to salicylic acid);GO:0010495(long-distance posttranscriptional gene silencing);GO:0016441(posttranscriptional gene silencing);GO:0016458(gene silencing);GO:0030422(production of siRNA involved in RNA inter…	NA	NA	NA	13.9918	12.7211	10.7819	12.9068	11.4722	11.3541	17.7523	16.0008	14.912	20.3088	20.5981	17.5815	31.4242	33.651	29.2722	1.8829e-51	6.60425e-51
Bv2_027210_udkx	blue	540.984	hypothetical protein BVRB_2g027210 [Beta vulgaris subsp. vulgaris]	GO:0005576(extracellular region);GO:0006869(lipid transport);GO:0008289(lipid binding)	NA	NA	NA	2.35473	2.82525	2.51437	2.3941	1.85445	1.99362	4.00442	3.7904	3.67734	6.43738	6.91963	6.6615	12.2229	11.3444	11.7693	1.03851e-153	9.77189e-153
Bv4_079080_csac	blue	540.958	PREDICTED: BTB/POZ domain-containing protein At2g13690 [Beta vulgaris subsp. vulgaris]	GO:0005634(nucleus);GO:0016567(protein ubiquitination)	NA	NA	NA	8.24431	8.49346	8.7425	6.67895	6.79599	7.87616	11.4262	11.721	10.1627	11.8375	12.8352	13.3959	19.3039	19.4976	19.8034	8.2846e-41	2.43471e-40
Bv1_009140_xuem	blue	540.432	PREDICTED: probable mitochondrial adenine nucleotide transporter BTL3 [Beta vulgaris subsp. vulgaris]	GO:0003735(structural constituent of ribosome);GO:0006412(translation)	NA	NA	NA	3.51244	2.54041	3.11996	4.04576	3.37578	4.35759	4.48295	4.85602	4.33121	5.53222	4.23841	4.75877	7.15745	6.24608	6.83395	1.34652e-12	2.03777e-12
Bv7_156660_tunm	blue	540.406	PREDICTED: acetyltransferase NSI isoform X1 [Beta vulgaris subsp. vulgaris]	GO:0004596(peptide alpha-N-acetyltransferase activity);GO:0006474(N-terminal protein amino acid acetylation);GO:0031248(protein acetyltransferase complex)	NA	NA	NA	45.8614	43.5344	42.6269	55.8698	51.8031	53.3834	72.3374	55.1236	59.6163	54.2449	57.2716	58.8783	103.801	90.8156	86.9154	1.62325e-30	3.93004e-30
Bv2_036060_eeep	blue	539.943	PREDICTED: coiled-coil domain-containing protein 94 homolog [Beta vulgaris subsp. vulgaris]	GO:0003674(molecular_function);GO:0005634(nucleus);GO:0008380(RNA splicing)	00970(Aminoacyl-tRNA biosynthesis)	K01867	EC:6.1.1.2	3.68742	3.37431	3.30848	3.28258	3.45728	2.89999	2.73982	2.12808	2.27876	2.5395	2.31209	1.9167	0.946744	0.821077	1.41957	3.94796e-19	7.24294e-19
Bv8_190600_rrwd	blue	539.401	hypothetical protein BVRB_8g190600 [Beta vulgaris subsp. vulgaris]	NA	NA	NA	NA	27.5654	28.6628	30.2624	28.1031	31.8313	26.0526	47.7379	45.8836	46.1213	42.6985	43.0127	48.7174	59.2238	56.284	58.5944	5.64643e-43	1.72594e-42
Bv5_102530_ukja	blue	539.39	PREDICTED: uncharacterized protein LOC104892477 [Beta vulgaris subsp. vulgaris]	GO:0009507(chloroplast);GO:0016021(integral component of membrane)	NA	NA	NA	7.59451	6.50213	7.16439	11.1653	12.6414	12.4272	13.9966	11.0628	13.9642	11.1519	10.8038	10.6694	18.1246	18.1321	16.8352	2.62097e-39	7.4926e-39
Bv5_120260_uphd	blue	538.895	PREDICTED: uncharacterized protein LOC104894587 [Beta vulgaris subsp. vulgaris]	GO:0005886(plasma membrane)	00260(Glycine, serine and threonine metabolism);00400(Phenylalanine, tyrosine and tryptophan biosynthesis)	K01695	EC:4.2.1.20	10.0694	10.6677	8.96145	27.403	25.809	24.4318	26.1956	25.1346	27.1442	23.3544	19.8248	23.4446	37.4171	36.0846	36.1643	3.14161e-66	1.36848e-65
Bv9_208560_zcsa	blue	538.541	hypothetical protein BVRB_9g208560 isoform A [Beta vulgaris subsp. vulgaris];hypothetical protein BVRB_9g208560 isoform B [Beta vulgaris subsp. vulgaris]	NA	NA	NA	NA	1.20855	0.663378	0.68738	2.73068	3.40241	3.71273	5.20759	5.76686	5.77211	2.80898	2.24176	2.77668	13.5338	11.4659	9.9631	8.40024e-54	3.05711e-53
Bv6_133760_mfru	blue	538.439	PREDICTED: nicotinamidase 1 [Beta vulgaris subsp. vulgaris]	GO:0003824(catalytic activity);GO:0005634(nucleus);GO:0005737(cytoplasm);GO:0006769(nicotinamide metabolic process);GO:0008936(nicotinamidase activity);GO:0009737(response to abscisic acid);GO:0019365(pyridine nucleotide salvage)	NA	NA	NA	10.1405	10.5045	10.7911	6.45419	6.53278	7.8173	7.44212	7.93356	8.00856	6.05055	5.47197	5.92114	3.13759	2.4196	3.07891	9.01762e-60	3.61295e-59
Bv9_223070_htro	blue	537.429	PREDICTED: CBL-interacting serine/threonine-protein kinase 5 [Beta vulgaris subsp. vulgaris]	GO:0004674(protein serine/threonine kinase activity);GO:0005524(ATP binding);GO:0005622(intracellular);GO:0005886(plasma membrane);GO:0016301(kinase activity);GO:0018105(peptidyl-serine phosphorylation);GO:0018107(peptidyl-threonine phosphorylation);GO:0035556(intracellular signal transduction);GO:0050832(defense response to fungus)	NA	NA	NA	1.72384	2.89553	2.18029	16.4876	16.905	16.6447	60.6805	54.7971	56.6902	30.1373	29.9716	33.3888	62.8527	72.6134	70.518	0	0
Bv9_224650_wqhw	blue	537.132	hypothetical protein BVRB_9g224650 [Beta vulgaris subsp. vulgaris]	GO:0051213(dioxygenase activity)	00904(Diterpenoid biosynthesis)	K05282	EC:1.14.11.12	63.7552	56.3238	71.4635	79.8664	97.2956	76.5799	225.035	184.739	198.992	146.33	133.635	140.58	256.262	249.757	236.276	3.75357e-119	2.7463e-118
Bv7_176050_wshp	blue	535.6	PREDICTED: DNA polymerase epsilon subunit 3 isoform X1 [Beta vulgaris subsp. vulgaris]	GO:0003700(DNA binding transcription factor activity);GO:0005515(protein binding);GO:0005634(nucleus);GO:0006355(regulation of transcription, DNA-templated);GO:0046982(protein heterodimerization activity)	00230(Purine metabolism);00240(Pyrimidine metabolism);03030(DNA replication);03410(Base excision repair);03420(Nucleotide excision repair)	K02326	EC:2.7.7.7	18.7961	18.2646	19.1336	22.6794	18.8323	22.1636	20.2646	25.3695	27.018	31.9298	30.4388	30.1474	38.4943	41.1946	41.7223	5.93002e-35	1.56815e-34
Bv2_031960_oaoz	blue	535.543	PREDICTED: D-amino-acid transaminase, chloroplastic [Beta vulgaris subsp. vulgaris]	GO:0003824(catalytic activity);GO:0004084(branched-chain-amino-acid transaminase activity);GO:0008152(metabolic process);GO:0008153(para-aminobenzoic acid biosynthetic process);GO:0008483(transaminase activity);GO:0008696(4-amino-4-deoxychorismate lyase activity);GO:0009507(chloroplast);GO:0009570(chloroplast stroma);GO:0046654(tetrahydrofolate biosynthetic process);GO:0047810(D-alanine:2-oxoglut…	00790(Folate biosynthesis)	K18482	EC:4.1.3.38	11.0922	12.1077	12.4227	33.5451	33.6837	34.8174	23.0308	25.0912	23.0149	24.8328	27.8913	27.9295	57.4614	58.2005	59.34	5.3984e-189	6.3362e-188
Bv8_198400_xdmy	blue	534.977	PREDICTED: pentatricopeptide repeat-containing protein At2g18940, chloroplastic [Beta vulgaris subsp. vulgaris]	GO:0003729(mRNA binding);GO:0005739(mitochondrion);GO:0008150(biological_process);GO:0009507(chloroplast);GO:0043231(intracellular membrane-bounded organelle)	NA	NA	NA	7.21333	7.235	7.05087	11.4302	10.6152	12.0135	11.5949	10.3105	10.9855	14.1441	12.5304	11.7516	19.1611	17.6924	15.4741	1.1208e-14	1.80482e-14
Bv_005580_xtwf	blue	534.771	PREDICTED: serine/threonine-protein kinase OXI1 [Beta vulgaris subsp. vulgaris]	GO:0004674(protein serine/threonine kinase activity);GO:0005634(nucleus);GO:0005737(cytoplasm);GO:0005886(plasma membrane);GO:0035556(intracellular signal transduction)	04016(MAPK signaling pathway - plant)	K20714	EC:2.7.11.1	18.3291	20.8537	20.2977	17.0887	14.8996	17.581	14.0743	13.298	15.9709	15.298	14.6433	16.5418	10.0375	7.45799	10.0779	2.12328e-21	4.14287e-21
Bv4_097320_atax	blue	534.476	hypothetical protein BVRB_4g097320 [Beta vulgaris subsp. vulgaris]	GO:0003697(single-stranded DNA binding);GO:0004176(ATP-dependent peptidase activity);GO:0005759(mitochondrial matrix);GO:0006515(protein quality control for misfolded or incompletely synthesized proteins);GO:0007005(mitochondrion organization);GO:0051131(chaperone-mediated protein complex assembly)	NA	NA	NA	0.434921	0.590262	0.719382	2.2619	1.79875	1.87019	3.11746	1.74027	2.3305	2.83506	3.08255	1.85094	4.00975	4.59503	5.02672	2.02059e-12	3.04042e-12
Bv2_047440_smfy	blue	533.146	PREDICTED: dirigent protein 2 [Beta vulgaris subsp. vulgaris]	GO:0009699(phenylpropanoid biosynthetic process);GO:0042349(guiding stereospecific synthesis activity)	00970(Aminoacyl-tRNA biosynthesis)	K01870	EC:6.1.1.5	0.452339	0.445752	0.125368	0.0001	0.0001	0.0001	1.64215	1.77408	2.28224	1.91579	2.05328	1.5293	4.4794	3.53005	4.91799	1.68992e-52	6.05492e-52
Bv9_215990_utmj	blue	533.007	PREDICTED: uncharacterized protein LOC104904101 [Beta vulgaris subsp. vulgaris]	GO:0003674(molecular_function);GO:0005575(cellular_component);GO:0008150(biological_process)	03040(Spliceosome);04141(Protein processing in endoplasmic reticulum);04144(Endocytosis)	K03283	NA	2.30896	3.70557	3.37386	4.93478	4.84266	7.04934	5.88184	7.41576	7.6276	5.62278	4.69156	5.06459	11.4057	12.0539	10.9217	2.92193e-15	4.79012e-15
Bv4_075030_shqh	blue	532.8	hypothetical protein BVRB_4g075030 [Beta vulgaris subsp. vulgaris]	GO:0004674(protein serine/threonine kinase activity);GO:0005886(plasma membrane);GO:0007166(cell surface receptor signaling pathway)	NA	NA	NA	0.955769	1.34954	1.24295	0.982269	1.23759	0.892929	4.59544	4.07607	2.75657	4.02318	3.70591	4.08856	6.59468	6.56616	8.40053	1.99287e-32	5.02827e-32
Bv6_137050_dufo	blue	532.592	hypothetical protein BVRB_6g137050 [Beta vulgaris subsp. vulgaris]	NA	NA	NA	NA	0.329806	0.0001	0.229468	0.82449	0.961211	0.922134	2.11528	3.17412	1.4535	2.63246	2.68699	2.62967	3.79197	4.98153	5.73845	8.60067e-19	1.56188e-18
Bv6_142220_qyea	blue	532.122	PREDICTED: uncharacterized protein LOC104896528 [Beta vulgaris subsp. vulgaris]	GO:0003674(molecular_function);GO:0008150(biological_process);GO:0009507(chloroplast);GO:0016021(integral component of membrane)	NA	NA	NA	4.77654	3.2885	4.29365	4.94145	3.61809	5.82547	8.61208	7.16398	6.80007	8.06201	6.74676	7.49245	11.1752	10.5889	10.0902	1.13776e-13	1.77828e-13
Bv4_071090_wzrs	blue	531.997	PREDICTED: putative ETHYLENE INSENSITIVE 3-like 4 protein [Beta vulgaris subsp. vulgaris]	GO:0003700(DNA binding transcription factor activity);GO:0005634(nucleus);GO:0006351(transcription, DNA-templated);GO:0006355(regulation of transcription, DNA-templated);GO:0080167(response to karrikin)	04016(MAPK signaling pathway - plant);04075(Plant hormone signal transduction)	K14514	NA	0.347542	0.245762	0.194623	1.17742	1.238	1.50642	1.49047	1.14367	1.14076	0.996006	1.34045	1.37844	2.65791	2.33582	2.06	6.87849e-21	1.32253e-20
Bv7_170880_zsuo	blue	531.746	hypothetical protein BVRB_7g170880 [Beta vulgaris subsp. vulgaris]	NA	NA	NA	NA	0.971022	0.886048	1.13483	4.50108	4.10211	4.50749	3.39603	3.90577	3.27059	2.51815	2.53494	2.60662	10.3585	9.30419	9.19031	1.00508e-73	4.78558e-73
Bv4_071310_jxdg	blue	531.678	PREDICTED: uncharacterized protein LOC104889874 [Beta vulgaris subsp. vulgaris]	GO:0005773(vacuole);GO:0008150(biological_process);GO:0009507(chloroplast)	NA	NA	NA	16.8019	15.9976	16.4875	16.7064	15.8984	14.2781	20.1912	22.5236	23.8954	20.1635	20.5825	20.0547	36.7892	33.3454	39.6465	1.82314e-43	5.62076e-43
Bv4_079790_fjpd	blue	531.398	PREDICTED: polygalacturonase At1g48100-like [Beta vulgaris subsp. vulgaris]	GO:0004650(polygalacturonase activity);GO:0005576(extracellular region);GO:0005975(carbohydrate metabolic process);GO:0016829(lyase activity);GO:0071555(cell wall organization)	00040(Pentose and glucuronate interconversions)	K01213	EC:3.2.1.67	1.60558	1.02876	1.64267	1.24055	0.953641	1.03206	4.95968	4.08094	3.67371	6.67118	7.87655	7.60932	13.1456	12.2504	10.6306	1.17674e-67	5.20955e-67
Bv8_192910_jpdp	blue	531.354	0	NA	NA	NA	NA	1.36195	1.34459	1.04502	3.54184	2.89421	3.61119	5.44817	3.59706	4.83573	2.32846	2.63507	2.40285	8.19273	9.58798	8.93645	3.82028e-35	1.01463e-34
Bv3_065210_izir	blue	531.236	PREDICTED: xyloglucan endotransglucosylase/hydrolase protein 24-like [Beta vulgaris subsp. vulgaris]	GO:0004553(hydrolase activity, hydrolyzing O-glycosyl compounds);GO:0005576(extracellular region);GO:0005618(cell wall);GO:0010411(xyloglucan metabolic process);GO:0016762(xyloglucan:xyloglucosyl transferase activity);GO:0016798(hydrolase activity, acting on glycosyl bonds);GO:0042546(cell wall biogenesis);GO:0048046(apoplast);GO:0071555(cell wall organization)	NA	NA	NA	350.289	338.368	332.804	306.813	277.217	295.966	282.096	251.418	250.693	334.072	296.517	312.614	69.2787	73.3254	71.8356	1.65106e-266	2.90951e-265
Bv_017470_urdk	blue	530.979	unnamed protein product [Brassica rapa]	GO:0003674(molecular_function);GO:0005575(cellular_component);GO:0008150(biological_process)	NA	NA	NA	0.650731	0.273403	0.291586	0.766197	0.974248	0.989159	1.38963	1.24135	0.962729	2.09248	1.30035	1.93916	3.40104	4.87237	4.54409	2.12708e-32	5.36264e-32
Bv6_138530_ywks	blue	530.948	PREDICTED: serine/threonine-protein kinase SAPK2 [Beta vulgaris subsp. vulgaris]	GO:0004674(protein serine/threonine kinase activity);GO:0005634(nucleus);GO:0005737(cytoplasm);GO:0006468(protein phosphorylation);GO:0035556(intracellular signal transduction)	04016(MAPK signaling pathway - plant);04075(Plant hormone signal transduction)	K14498	EC:2.7.11.1	186.335	186.128	184.604	133.268	126.729	138.259	96.9245	98.7788	101.204	92.6095	87.8462	95.24	65.3291	61.9714	74.028	3.00945e-114	2.12092e-113
Bv6_144740_ggin	blue	530.635	hypothetical protein BVRB_6g144740 [Beta vulgaris subsp. vulgaris]	NA	NA	NA	NA	9.04104	9.40258	10.6641	12.8912	11.2249	13.5634	25.2402	19.0132	21.8969	20.2615	16.0025	17.0998	31.4577	25.3325	30.6672	8.3282e-38	2.32272e-37
Bv9_219030_hnou	blue	530.577	PREDICTED: putative protein TPRXL [Beta vulgaris subsp. vulgaris]	GO:0003674(molecular_function);GO:0005634(nucleus);GO:0008150(biological_process)	NA	NA	NA	11.4564	9.95407	9.65442	64.6445	68.8081	69.7465	58.7519	68.4599	89.2273	39.7139	31.8097	36.83	152.234	151.79	155.67	4.01307e-221	5.67965e-220
Bv6_138470_juuq	blue	530.184	PREDICTED: uncharacterized membrane protein At3g27390 isoform X1 [Beta vulgaris subsp. vulgaris]	GO:0010228(vegetative to reproductive phase transition of meristem);GO:0016021(integral component of membrane)	NA	NA	NA	38.1296	37.6166	38.1485	34.0184	34.5016	34.9847	22.531	23.9888	23.9428	33.7997	35.1527	33.169	14.3838	13.4806	14.2573	1.14602e-153	1.07781e-152
Bv6_153480_ahsh	blue	530.149	PREDICTED: mitochondrial uncoupling protein 3 [Beta vulgaris subsp. vulgaris]	GO:0003735(structural constituent of ribosome);GO:0006412(translation);GO:0006412(translation)	NA	NA	NA	9.1882	7.39144	10.0208	11.2501	12.3254	12.4198	11.7431	10.5433	11.3927	12.6289	15.9613	11.3008	29.2369	28.8822	28.1884	1.47977e-34	3.87963e-34
Bv4_078560_topn	blue	529.33	hypothetical protein SOVF_162740 [Spinacia oleracea]	GO:0003674(molecular_function);GO:0009733(response to auxin)	04075(Plant hormone signal transduction)	K14488	NA	1.05872	0.808598	0.964129	0.90518	1.54094	1.512	2.87924	2.30381	2.67362	2.38128	2.24842	1.80209	3.14024	3.95633	3.94166	1.13275e-15	1.88286e-15
Bv8_182050_xadp	blue	528.841	PREDICTED: magnesium-chelatase subunit ChlI, chloroplastic isoform X1 [Beta vulgaris subsp. vulgaris]	GO:0005524(ATP binding);GO:0005618(cell wall);GO:0009507(chloroplast);GO:0009570(chloroplast stroma);GO:0009735(response to cytokinin);GO:0010007(magnesium chelatase complex);GO:0015979(photosynthesis);GO:0015995(chlorophyll biosynthetic process);GO:0016851(magnesium chelatase activity);GO:0016887(ATPase activity)	00860(Porphyrin and chlorophyll metabolism)	K03405	EC:6.6.1.1	10.7267	11.3031	11.4569	17.664	22.7474	14.6718	15.4476	16.6016	19.2371	20.7317	20.3551	17.9968	31.5655	32.3397	30.4432	5.13107e-25	1.09702e-24
Bv3_062750_uhju	blue	528.61	hypothetical protein BVRB_3g062750 [Beta vulgaris subsp. vulgaris]	NA	NA	NA	NA	1.4016	1.21668	0.855869	0.663575	0.207554	0.662584	2.95547	3.12115	3.14249	2.03546	1.96658	1.88787	7.84269	7.82069	8.12753	3.33351e-51	1.16363e-50
Bv8_187090_fidy	blue	528.361	hypothetical protein BVRB_8g187090 [Beta vulgaris subsp. vulgaris]	GO:0004674(protein serine/threonine kinase activity);GO:0005886(plasma membrane);GO:0006468(protein phosphorylation);GO:0006952(defense response);GO:0009506(plasmodesma)	NA	NA	NA	43.3138	42.1861	39.0965	40.6396	37.3251	39.0006	76.8148	73.3586	82.0729	65.8129	63.3499	60.3713	94.2671	104.652	96.5974	1.96534e-113	1.37437e-112
Bv9_225110_fqqy	blue	528.254	PREDICTED: uncharacterized membrane protein At3g27390 isoform X2 [Beta vulgaris subsp. vulgaris]	GO:0010228(vegetative to reproductive phase transition of meristem);GO:0016021(integral component of membrane)	NA	NA	NA	4.54084	6.86336	5.64469	20.1234	18.6197	19.7158	33.0741	28.7555	25.8266	14.2139	11.9321	12.228	109.255	112.477	109.568	0	0
Bv6_133100_temk	blue	528.139	PREDICTED: UPF0235 protein C15orf40 homolog [Beta vulgaris subsp. vulgaris]	GO:0005634(nucleus);GO:0016301(kinase activity);GO:0016310(phosphorylation)	NA	NA	NA	8.59172	6.7491	6.08138	41.6143	41.6641	37.4247	39.5228	35.7979	31.7561	34.5225	36.349	36.195	58.3926	59.6796	60.4631	9.25718e-185	1.06287e-183
Bv6_144370_hxzq	blue	528.033	PREDICTED: F-box protein SKIP28 isoform X1 [Beta vulgaris subsp. vulgaris]	GO:0005515(protein binding);GO:0005634(nucleus);GO:0009793(embryo development ending in seed dormancy);GO:0016567(protein ubiquitination);GO:0016567(protein ubiquitination)	NA	NA	NA	2.06532	2.22313	2.05548	6.15344	5.89745	7.23324	7.11461	6.70092	7.28864	4.50307	3.88906	4.74828	10.6979	12.5184	12.0625	1.10322e-62	4.60076e-62
Bv7_177950_ximt	blue	527.946	hypothetical protein BVRB_7g177950 [Beta vulgaris subsp. vulgaris]	GO:0004672(protein kinase activity);GO:0004674(protein serine/threonine kinase activity);GO:0005524(ATP binding);GO:0006468(protein phosphorylation);GO:0007169(transmembrane receptor protein tyrosine kinase signaling pathway);GO:0016021(integral component of membrane);GO:0016301(kinase activity);GO:0080092(regulation of pollen tube growth)	NA	NA	NA	3.34142	3.65978	3.36101	5.62275	6.58784	6.81097	6.48706	6.00894	7.24256	8.31428	8.22566	5.9568	9.97065	10.8094	10.072	3.9637e-17	6.87444e-17
Bv_010830_jrft	blue	527.45	PREDICTED: zinc finger protein CONSTANS-LIKE 16 [Beta vulgaris subsp. vulgaris]	GO:0003700(DNA binding transcription factor activity);GO:0005515(protein binding);GO:0005634(nucleus);GO:0006355(regulation of transcription, DNA-templated);GO:0008270(zinc ion binding);GO:0016020(membrane)	04712(Circadian rhythm - plant)	K12135	NA	1.75943	1.4934	1.93414	2.37344	2.81204	2.13457	2.618	3.19028	2.25857	3.86632	3.2939	3.36004	6.207	8.25591	7.09693	6.86373e-37	1.8784e-36
Bv4_096730_kwcn	blue	527.281	PREDICTED: uncharacterized protein LOC104907711 [Beta vulgaris subsp. vulgaris]	NA	NA	NA	NA	56.549	56.5062	59.9824	191.115	200.899	200.911	272.492	294.818	295.307	198.949	192.93	199.54	331.31	330.497	334.913	0	0
Bv8_184260_wumg	blue	527.266	PREDICTED: C2 and GRAM domain-containing protein At1g03370 [Beta vulgaris subsp. vulgaris]	GO:0010152(pollen maturation)	04144(Endocytosis)	K12486	NA	192.68	184.955	185.846	116.997	120.804	118.841	91.3484	90.8876	85.6438	131.18	130.086	138.455	59.5165	60.2326	59.1006	8.81519e-189	1.03274e-187
Bv1_022660_angp	blue	526.977	PREDICTED: uncharacterized protein LOC104905848 [Beta vulgaris subsp. vulgaris]	GO:0005634(nucleus);GO:0005768(endosome);GO:0005794(Golgi apparatus);GO:0005802(trans-Golgi network);GO:0006004(fucose metabolic process);GO:0006486(protein glycosylation);GO:0016021(integral component of membrane);GO:0016757(transferase activity, transferring glycosyl groups)	NA	NA	NA	4.80931	4.57878	5.22431	6.31489	5.67571	5.98257	8.54023	8.98849	8.37416	9.47734	8.40811	8.29585	10.3343	10.7759	9.59156	5.29279e-22	1.05053e-21
Bv6_128950_edcy	blue	526.891	hypothetical protein BVRB_6g128950 [Beta vulgaris subsp. vulgaris]	NA	NA	NA	NA	6.24489	5.94392	5.89295	12.1294	9.13485	13.0503	16.4908	12.0298	13.159	9.46733	8.42495	11.3973	21.8238	23.3429	24.6934	2.08587e-37	5.76409e-37
Bv6_133830_crxq	blue	526.619	PREDICTED: artemisinic aldehyde Delta(11(13)) reductase [Beta vulgaris subsp. vulgaris]	GO:0003959(NADPH dehydrogenase activity);GO:0005777(peroxisome);GO:0009695(jasmonic acid biosynthetic process);GO:0016629(12-oxophytodienoate reductase activity);GO:0031408(oxylipin biosynthetic process)	00592(alpha-Linolenic acid metabolism)	K05894	EC:1.3.1.42	1.70887	1.82953	1.51716	1.57879	2.1334	1.68627	3.2736	2.58496	2.8316	2.54625	2.02091	2.62643	4.2049	4.691	5.05523	5.89432e-11	8.45565e-11
Bv4_083780_pjwp	blue	526.53	PREDICTED: divinyl chlorophyllide a 8-vinyl-reductase, chloroplastic [Beta vulgaris subsp. vulgaris]	GO:0005739(mitochondrion);GO:0009507(chloroplast);GO:0009534(chloroplast thylakoid);GO:0009941(chloroplast envelope);GO:0015995(chlorophyll biosynthetic process);GO:0016020(membrane);GO:0033728(divinyl chlorophyllide a 8-vinyl-reductase activity);GO:0051744(3,8-divinyl protochlorophyllide a 8-vinyl reductase activity);GO:0055114(oxidation-reduction process)	00860(Porphyrin and chlorophyll metabolism)	K19073	EC:1.3.1.75	0.558872	0.631559	0.742451	1.10456	0.860465	0.542132	1.49596	1.42708	2.06556	1.35087	1.07846	1.09975	2.57049	2.53036	2.72362	2.12592e-22	4.2579e-22
Bv6_138390_aijq	blue	525.869	PREDICTED: anthocyanidin 3-O-glucosyltransferase 2 [Beta vulgaris subsp. vulgaris]	GO:0009813(flavonoid biosynthetic process);GO:0043231(intracellular membrane-bounded organelle);GO:0052696(flavonoid glucuronidation);GO:0080043(quercetin 3-O-glucosyltransferase activity);GO:0080044(quercetin 7-O-glucosyltransferase activity)	NA	NA	NA	4.54132	4.70713	4.57138	16.3564	18.679	17.6391	18.447	20.5272	21.7154	25.8524	25.4862	26.2727	30.763	31.6933	32.2235	2e-299	4e-298
Bv_008610_rmtz	blue	525.806	PREDICTED: transcription factor SPATULA isoform X1 [Beta vulgaris subsp. vulgaris]	GO:0003677(DNA binding);GO:0003700(DNA binding transcription factor activity);GO:0005515(protein binding);GO:0005634(nucleus);GO:0006351(transcription, DNA-templated);GO:0006355(regulation of transcription, DNA-templated);GO:0007623(circadian rhythm);GO:0009409(response to cold);GO:0009908(flower development);GO:0010114(response to red light);GO:0010154(fruit development);GO:0010187(negative regu…	NA	NA	NA	3.11925	2.90187	3.08043	4.0787	4.12758	3.78239	4.59749	5.40676	5.17514	7.03325	7.03397	8.92367	10.4877	11.303	13.4942	2.48588e-62	1.03012e-61
Bv1_018110_xrfj	blue	525.174	PREDICTED: cysteine proteinase inhibitor A [Beta vulgaris subsp. vulgaris]	NA	NA	NA	NA	0.123773	0.346519	0.0001	0.0001	0.167168	0.0001	2.55555	1.22357	1.8547	1.57455	1.80183	3.12157	5.82376	5.72145	4.37748	2.98267e-24	6.26334e-24
Bv4_088450_rizy	blue	525.155	PREDICTED: uncharacterized protein LOC104891692 [Beta vulgaris subsp. vulgaris]	GO:0003674(molecular_function);GO:0005634(nucleus);GO:0008150(biological_process)	NA	NA	NA	4.94486	5.44308	5.35845	4.73864	4.44507	4.72775	1.90351	2.24858	2.3355	1.63408	1.12474	1.337	0.258407	0.195787	0.377045	7.55718e-148	6.78466e-147
Bv4_089790_hkff	blue	525.12	PREDICTED: putative MO25-like protein At5g47540 [Beta vulgaris subsp. vulgaris]	GO:0005737(cytoplasm);GO:0008150(biological_process);GO:0008150(biological_process)	NA	NA	NA	6.67239	6.27115	7.27077	7.99505	7.39149	8.85605	13.6589	11.8596	15.3593	7.34276	8.90249	10.2578	23.4827	25.5892	23.0542	2.19719e-51	7.69807e-51
Bv6_140120_tzop	blue	525.104	PREDICTED: protein ABHD17B [Beta vulgaris subsp. vulgaris]	GO:0005634(nucleus);GO:0016787(hydrolase activity)	NA	NA	NA	13.685	9.88219	13.7684	12.4708	13.5809	12.1612	29.7673	30.1178	32.4515	33.7387	32.1781	31.529	41.3483	43.5188	40.6275	5.37455e-101	3.36645e-100
Bv1_008570_imwu	blue	525.036	PREDICTED: serine--tRNA ligase, chloroplastic/mitochondrial isoform X1 [Beta vulgaris subsp. vulgaris]	GO:0004828(serine-tRNA ligase activity);GO:0005737(cytoplasm);GO:0006434(seryl-tRNA aminoacylation)	00970(Aminoacyl-tRNA biosynthesis)	K01875	EC:6.1.1.11	3.47638	3.06404	3.42485	5.30364	4.76897	5.71214	5.0777	5.45173	4.35173	5.69562	5.80859	5.44548	7.20546	8.73949	8.69713	1.37322e-22	2.76554e-22
Bv_005360_xxys	blue	524.333	PREDICTED: ABSCISIC ACID-INSENSITIVE 5-like protein 2 isoform X2 [Beta vulgaris subsp. vulgaris]	GO:0000977(RNA polymerase II regulatory region sequence-specific DNA binding);GO:0001228(transcriptional activator activity, RNA polymerase II transcription regulatory region sequence-specific DNA binding);GO:0003677(DNA binding);GO:0003700(DNA binding transcription factor activity);GO:0005634(nucleus);GO:0006351(transcription, DNA-templated);GO:0006355(regulation of transcription, DNA-templated)…	04075(Plant hormone signal transduction)	K14432	NA	1.53391	1.9845	1.95941	0.555365	0.668775	1.19392	4.08466	4.65834	5.17523	3.62107	2.87763	3.88665	8.99535	9.79615	9.36897	1.02663e-65	4.44446e-65
Bv1_008600_pnap	blue	523.829	hypothetical protein BVRB_1g008600 [Beta vulgaris subsp. vulgaris]	GO:0005515(protein binding);GO:0005634(nucleus);GO:0006883(cellular sodium ion homeostasis);GO:0030007(cellular potassium ion homeostasis);GO:0043433(negative regulation of DNA binding transcription factor activity);GO:1901001(negative regulation of response to salt stress)	NA	NA	NA	9.25573	9.05194	10.4826	17.3207	18.3495	22.2311	17.0882	19.5793	25.0582	17.847	15.8167	20.8638	35.2194	30.2827	36.2549	1.31445e-38	3.71676e-38
Bv2_027240_diyp	blue	523.799	hypothetical protein BVRB_2g027240 [Beta vulgaris subsp. vulgaris]	GO:0005576(extracellular region);GO:0006869(lipid transport);GO:0008289(lipid binding)	NA	NA	NA	78.7768	77.4759	75.2482	169.688	172.449	179.426	619.96	635.239	629.486	471.147	466.082	494.536	710.078	695.611	740.409	0	0
Bv9_212050_tjqf	blue	522.903	PREDICTED: asparagine synthetase [glutamine-hydrolyzing] isoform X1 [Beta vulgaris subsp. vulgaris]	GO:0004066(asparagine synthase (glutamine-hydrolyzing) activity);GO:0005829(cytosol);GO:0006529(asparagine biosynthetic process);GO:0006541(glutamine metabolic process);GO:0009646(response to absence of light);GO:0042803(protein homodimerization activity)	00250(Alanine, aspartate and glutamate metabolism)	K01953	EC:6.3.5.4	1.71082	1.04937	1.48787	1.85563	2.0153	1.68406	1.96109	3.26522	2.2675	2.96332	2.57401	3.99548	6.93985	5.54666	5.98854	7.21003e-10	9.98171e-10
Bv2_035620_ttnz	blue	522.827	PREDICTED: uncharacterized protein LOC104886760 [Beta vulgaris subsp. vulgaris];hypothetical protein BVRB_2g035620 isoform B [Beta vulgaris subsp. vulgaris]	GO:0005634(nucleus);GO:0005634(nucleus)	NA	NA	NA	1.49123	1.72244	1.45569	1.87262	1.58267	1.69412	3.23519	2.47037	1.89596	2.92468	2.72008	3.03483	4.10678	4.18443	4.08638	1.70631e-17	2.99105e-17
Bv_007300_ffrk	blue	522.779	PREDICTED: uncharacterized protein LOC104884272 isoform X1 [Beta vulgaris subsp. vulgaris]	GO:0003674(molecular_function);GO:0008150(biological_process)	NA	NA	NA	27.2423	24.984	28.0799	30.9513	34.1346	36.2749	28.0636	30.2279	30.0227	38.0651	36.1347	36.0143	59.3139	57.1912	59.8403	4.60639e-55	1.71455e-54
Bv4_081380_igyi	blue	522.742	PREDICTED: probable linoleate 9S-lipoxygenase 5 isoform X1 [Beta vulgaris subsp. vulgaris]	GO:0016165(linoleate 13S-lipoxygenase activity)	00591(Linoleic acid metabolism)	K15718	EC:1.13.11.58	1.51471	1.26185	1.10899	1.25064	1.44802	1.32865	2.31613	2.44201	1.75557	2.00908	2.6549	2.30093	3.45577	3.4366	3.17971	3.34407e-25	7.18442e-25
Bv7_166410_jqsa	blue	522.73	PREDICTED: probable indole-3-pyruvate monooxygenase YUCCA5 [Beta vulgaris subsp. vulgaris]	GO:0004497(monooxygenase activity);GO:0055114(oxidation-reduction process)	00380(Tryptophan metabolism)	K11816	EC:1.14.13.168	23.2476	19.9109	21.3749	24.7125	19.1856	18.1896	57.6018	50.6235	46.7456	85.3863	76.6792	88.8826	113.151	115.465	115.836	2.63799e-156	2.53758e-155
Bv4_087440_twas	blue	522.494	PREDICTED: NAC domain-containing protein 72 [Beta vulgaris subsp. vulgaris]	GO:0003677(DNA binding);GO:0003700(DNA binding transcription factor activity);GO:0005634(nucleus);GO:0006351(transcription, DNA-templated);GO:0006355(regulation of transcription, DNA-templated);GO:0007275(multicellular organism development);GO:0009414(response to water deprivation);GO:0009737(response to abscisic acid);GO:0043565(sequence-specific DNA binding);GO:0045893(positive regulation of tr…	NA	NA	NA	33.3774	32.1877	33.2144	80.8847	73.6348	80.3286	69.951	69.9635	73.6288	52.4461	45.4744	50.633	158.847	150.08	161.665	3.43945e-292	6.84966e-291
Bv_007480_aapr	blue	522.148	hypothetical protein BVRB_007480 [Beta vulgaris subsp. vulgaris]	GO:0003700(DNA binding transcription factor activity);GO:0005515(protein binding);GO:0005634(nucleus);GO:0006351(transcription, DNA-templated);GO:0006355(regulation of transcription, DNA-templated);GO:0043565(sequence-specific DNA binding);GO:0046982(protein heterodimerization activity)	NA	NA	NA	5.60127	6.0401	5.51842	7.87029	8.14911	8.21785	8.8984	9.17258	9.77137	13.3742	10.6339	9.95794	14.0618	13.7918	13.491	3.50123e-36	9.44829e-36
Bv6_128690_ayqe	blue	521.903	PREDICTED: uncharacterized protein LOC104895017 [Beta vulgaris subsp. vulgaris]	GO:0003674(molecular_function);GO:0008150(biological_process);GO:0009507(chloroplast)	NA	NA	NA	0.0565131	0.0001	0.0001	0.960621	1.44909	1.63752	3.41196	3.47774	3.60716	1.15361	1.07691	0.931441	5.70994	4.94042	5.59341	6.62823e-177	7.27993e-176
Bv9_225210_idxi	blue	521.365	PREDICTED: F-box/kelch-repeat protein At3g23880 isoform X1 [Beta vulgaris subsp. vulgaris]	GO:0004842(ubiquitin-protein transferase activity);GO:0019005(SCF ubiquitin ligase complex);GO:0031146(SCF-dependent proteasomal ubiquitin-dependent protein catabolic process);GO:0031146(SCF-dependent proteasomal ubiquitin-dependent protein catabolic process)	04141(Protein processing in endoplasmic reticulum);04626(Plant-pathogen interaction);04626(Plant-pathogen interaction)	K04079	NA	18.6603	21.9991	21.1672	19.8031	18.1045	21.5363	27.7034	27.1535	34.8495	36.0107	35.2567	37.4001	45.7426	48.2786	50.5357	2.48489e-33	6.38428e-33
Bv2_035670_ffno	blue	521.271	PREDICTED: uncharacterized protein LOC104886764 [Beta vulgaris subsp. vulgaris]	GO:0070475(rRNA base methylation);GO:0071424(rRNA (cytosine-N4-)-methyltransferase activity)	NA	NA	NA	8.58537	6.89167	8.72305	11.046	13.5151	14.2116	15.3397	12.8501	12.1849	13.4016	14.2791	14.8299	19.2331	18.2774	21.3775	1.3488e-13	2.10241e-13
Bv4_081690_yrty	blue	521.22	PREDICTED: alpha-crystallin domain-containing protein 22.3 [Beta vulgaris subsp. vulgaris]	GO:0003674(molecular_function);GO:0005634(nucleus);GO:0005730(nucleolus);GO:0008150(biological_process)	NA	NA	NA	0.893863	0.806566	1.02882	1.46107	1.32399	1.3869	1.47583	1.67286	1.51324	1.8438	1.7149	1.62338	1.96124	2.20579	1.98377	1.13476e-15	1.88604e-15
Bv3_055720_gtap	blue	520.987	PREDICTED: chloride conductance regulatory protein ICln [Beta vulgaris subsp. vulgaris]	GO:0000387(spliceosomal snRNP assembly);GO:0005216(ion channel activity);GO:0005634(nucleus);GO:0005829(cytosol);GO:0005886(plasma membrane);GO:0006821(chloride transport);GO:0006884(cell volume homeostasis);GO:0034709(methylosome);GO:0034715(pICln-Sm protein complex)	03013(RNA transport)	K05019	NA	3.79333	3.97957	3.98613	4.28242	5.05238	4.57553	5.73481	5.48607	5.61274	7.69644	6.66674	6.75346	8.64966	8.15894	7.90197	2.01417e-43	6.20465e-43
Bv_008740_tmsg	blue	520.417	hypothetical protein BVRB_008740 [Beta vulgaris subsp. vulgaris]	GO:0004579(dolichyl-diphosphooligosaccharide-protein glycotransferase activity);GO:0006487(protein N-linked glycosylation);GO:0008250(oligosaccharyltransferase complex)	00510(N-Glycan biosynthesis);04141(Protein processing in endoplasmic reticulum)	K12667	NA	0.306023	0.117881	0.342971	0.869606	0.799159	0.950251	1.07241	1.29444	1.25001	0.456067	0.414384	0.753459	2.5532	2.45553	2.21618	2.8264e-23	5.80042e-23
Bv7_161410_zzeq	blue	520.347	hypothetical protein BVRB_7g161410 isoform A [Beta vulgaris subsp. vulgaris];hypothetical protein BVRB_7g161410 isoform B [Beta vulgaris subsp. vulgaris]	GO:0005739(mitochondrion);GO:0008270(zinc ion binding);GO:0055114(oxidation-reduction process);GO:0055114(oxidation-reduction process)	NA	NA	NA	1.87614	2.04106	1.28564	6.27659	4.8843	5.34289	4.59679	4.75759	5.18704	6.16811	5.33785	5.34919	9.21995	8.10625	8.06298	2.43563e-26	5.36949e-26
Bv4_074830_kzem	blue	520.247	PREDICTED: peptide chain release factor PrfB1, chloroplastic [Beta vulgaris subsp. vulgaris]	GO:0016149(translation release factor activity, codon specific);GO:0043022(ribosome binding)	NA	NA	NA	4.50734	4.81267	4.81469	8.09667	6.57526	7.25665	7.76857	7.42472	6.67436	6.93166	7.131	5.70658	11.6514	10.7995	10.1525	2.14984e-18	3.85833e-18
Bv3_067240_pzis	blue	519.434	PREDICTED: phosphatidylinositol 3-kinase 2 [Beta vulgaris subsp. vulgaris]	GO:0003674(molecular_function);GO:0005634(nucleus);GO:0008150(biological_process)	NA	NA	NA	16.2703	12.0023	15.8149	24.0035	22.1614	22.7766	15.5364	17.7526	17.5928	31.4377	30.3203	32.1314	66.4242	61.4322	63.0354	3.71893e-142	3.21849e-141
Bv2_030880_fzot	blue	519.252	hypothetical protein BVRB_2g030880 [Beta vulgaris subsp. vulgaris]	GO:0004364(glutathione transferase activity);GO:0005737(cytoplasm);GO:0006749(glutathione metabolic process)	NA	NA	NA	0.359903	0.377046	0.223651	1.37922	1.0225	1.03396	1.39993	0.788866	0.973738	1.15536	1.20246	1.22829	3.52841	3.91338	2.66254	1.42879e-24	3.02847e-24
Bv_006710_gkqg	blue	518.993	PREDICTED: malate dehydrogenase [NADP], chloroplastic [Beta vulgaris subsp. vulgaris]	GO:0005737(cytoplasm);GO:0005739(mitochondrion);GO:0005975(carbohydrate metabolic process);GO:0006099(tricarboxylic acid cycle);GO:0006107(oxaloacetate metabolic process);GO:0006108(malate metabolic process);GO:0006734(NADH metabolic process);GO:0008746(NAD(P)+ transhydrogenase activity);GO:0009507(chloroplast);GO:0009570(chloroplast stroma);GO:0009579(thylakoid);GO:0009941(chloroplast envelope);…	00620(Pyruvate metabolism);00710(Carbon fixation in photosynthetic organisms)	K00051	EC:1.1.1.82	2.97873	2.65833	1.90624	8.88549	7.66217	8.49657	6.5893	5.29505	5.91918	8.47056	9.15615	8.72953	13.7209	13.8681	13.7862	5.59448e-81	2.879e-80
Bv6_153830_pdmn	blue	518.786	PREDICTED: ribonuclease 1 [Beta vulgaris subsp. vulgaris]	GO:0003723(RNA binding);GO:0004521(endoribonuclease activity);GO:0004540(ribonuclease activity);GO:0005576(extracellular region);GO:0005618(cell wall);GO:0005886(plasma membrane);GO:0007568(aging);GO:0009611(response to wounding);GO:0009718(anthocyanin-containing compound biosynthetic process);GO:0009867(jasmonic acid mediated signaling pathway);GO:0016036(cellular response to phosphate starvatio…	NA	NA	NA	11.5047	11.3736	9.83577	10.7307	9.61378	9.16458	12.9666	12.7406	11.8599	17.7624	17.9738	17.6831	28.5136	31.499	28.957	1.91584e-133	1.56323e-132
Bv7_168690_xpza	blue	518.681	hypothetical protein BVRB_7g168690 [Beta vulgaris subsp. vulgaris]	GO:0005524(ATP binding);GO:0006952(defense response);GO:0043531(ADP binding)	04626(Plant-pathogen interaction)	K13459	NA	460.068	451.961	439.145	332.844	348.443	327.398	231.92	218.629	201.626	189.403	225.365	223.998	160.51	154.341	146.701	5.52763e-128	4.30307e-127
Bv8_199730_swix	blue	518.483	PREDICTED: F-box/LRR-repeat protein At3g26922 [Beta vulgaris subsp. vulgaris]	GO:0003674(molecular_function);GO:0005634(nucleus);GO:0008150(biological_process)	NA	NA	NA	14.039	14.0282	13.7287	23.5021	25.2745	22.7476	100.139	94.7648	90.7904	60.831	64.1462	64.9754	111.573	106.632	109.865	0	0
Bv7_162920_isps	blue	516.806	PREDICTED: uncharacterized protein LOC104898831 [Beta vulgaris subsp. vulgaris]	NA	NA	NA	NA	21.0299	26.9765	25.6137	29.6718	25.38	38.6244	36.812	33.6337	40.3706	38.5764	39.0325	34.1208	51.6004	51.0321	55.3452	5.8784e-13	8.99945e-13
Bv_041460_ceic	blue	516.788	hypothetical protein BVRB_041110, partial [Beta vulgaris subsp. vulgaris]	NA	NA	NA	NA	0.340788	2.76848	0.503989	1.33211	1.65779	2.04605	3.9504	3.40172	3.56696	2.94956	2.30916	2.32878	6.95434	6.82439	7.30534	1.49948e-08	1.98512e-08
Bv3_048790_zgkx	blue	516.738	PREDICTED: dCTP pyrophosphatase 1 [Beta vulgaris subsp. vulgaris]	GO:0005737(cytoplasm);GO:0009143(nucleoside triphosphate catabolic process);GO:0046872(metal ion binding);GO:0047429(nucleoside-triphosphate diphosphatase activity)	00240(Pyrimidine metabolism)	K16904	EC:3.6.1.12	1.62757	1.64655	1.6198	3.19153	2.84444	2.11951	2.1949	3.09965	2.67923	7.9252	9.51187	7.2445	29.6915	29.4569	31.95	2.38478e-228	3.56103e-227
Bv_003610_xqqu	blue	516.595	PREDICTED: phospholipid-transporting ATPase 1 [Beta vulgaris subsp. vulgaris]	GO:0004012(phospholipid-translocating ATPase activity);GO:0005886(plasma membrane)	NA	NA	NA	27.5115	27.1344	26.7313	16.9229	16.5641	17.127	13.3486	12.4865	13.8948	17.0664	19.0719	18.9523	9.43584	9.31127	9.31516	1.83414e-159	1.80363e-158
Bv4_084080_rwwj	blue	516.462	PREDICTED: transcription repressor MYB6 [Beta vulgaris subsp. vulgaris]	GO:0000981(RNA polymerase II transcription factor activity, sequence-specific DNA binding);GO:0001135(transcription factor activity, RNA polymerase II transcription factor recruiting);GO:0003677(DNA binding);GO:0003700(DNA binding transcription factor activity);GO:0005515(protein binding);GO:0005634(nucleus);GO:0006351(transcription, DNA-templated);GO:0006355(regulation of transcription, DNA-temp…	NA	NA	NA	2.55819	2.77446	2.3829	4.57772	4.53458	5.33241	13.0939	12.3917	12.4819	6.2906	5.93237	5.72423	15.9708	15.7556	16.5731	5.40449e-218	7.49794e-217
Bv4_078540_kucc	blue	515.725	hypothetical protein BVRB_4g078540 [Beta vulgaris subsp. vulgaris]	NA	NA	NA	NA	7.90505	7.46576	7.89849	7.69777	8.25987	8.54986	13.998	10.0751	10.032	12.8329	11.3732	12.1136	15.9574	16.1762	17.7672	2.74404e-23	5.63506e-23
Bv5_097800_wxth	blue	515.315	PREDICTED: uncharacterized protein LOC104892044 [Beta vulgaris subsp. vulgaris]	GO:0005634(nucleus);GO:0008150(biological_process)	NA	NA	NA	1.97514	2.21933	2.34772	1.47384	1.44851	1.19518	3.7069	4.27504	4.54106	4.45017	4.01534	4.59398	6.99986	6.99566	6.72859	2.11646e-75	1.02732e-74
Bv5_104730_xsdz	blue	515.184	PREDICTED: homeobox-leucine zipper protein HAT4 isoform X3 [Beta vulgaris subsp. vulgaris]	GO:0003677(DNA binding);GO:0003700(DNA binding transcription factor activity);GO:0005515(protein binding);GO:0005634(nucleus);GO:0006351(transcription, DNA-templated);GO:0006355(regulation of transcription, DNA-templated);GO:0008283(cell proliferation);GO:0009585(red, far-red light phototransduction);GO:0009641(shade avoidance);GO:0009733(response to auxin);GO:0009735(response to cytokinin);GO:00…	NA	NA	NA	47.0548	45.5479	46.7593	50.8577	51.9046	51.8271	59.213	67.3448	66.0788	93.0944	97.387	95.9201	119.282	119.189	117.202	2.13409e-160	2.10843e-159
Bv5_113630_nkus	blue	515.182	PREDICTED: methyl-CpG-binding domain-containing protein 9 [Beta vulgaris subsp. vulgaris]	GO:0003677(DNA binding);GO:0005634(nucleus);GO:0006355(regulation of transcription, DNA-templated);GO:0046872(metal ion binding)	NA	NA	NA	3.72491	3.66583	3.68655	6.55801	5.55324	6.22301	5.81259	5.987	7.12452	5.2474	4.902	4.45052	9.70681	9.91196	9.30594	1.0282e-37	2.86048e-37
Bv9_203680_pmyq	blue	514.73	PREDICTED: DNA-directed RNA polymerases IV and V subunit 4 isoform X2 [Beta vulgaris subsp. vulgaris]	GO:0000288(nuclear-transcribed mRNA catabolic process, deadenylation-dependent decay);GO:0000932(P-body);GO:0003697(single-stranded DNA binding);GO:0003727(single-stranded RNA binding);GO:0003899(DNA-directed 5'-3' RNA polymerase activity);GO:0005665(DNA-directed RNA polymerase II, core complex);GO:0006367(transcription initiation from RNA polymerase II promoter);GO:0031369(translation initiation…	00230(Purine metabolism);00240(Pyrimidine metabolism);03020(RNA polymerase)	K03012	NA	27.7876	20.5934	24.6607	26.1645	27.398	25.5058	47.0175	53.0213	41.5592	45.2542	49.1913	48.7937	58.5665	60.1305	63.2338	1.41738e-49	4.833e-49
Bv8_185190_wyik	blue	514.082	PREDICTED: BAG family molecular chaperone regulator 5, mitochondrial [Beta vulgaris subsp. vulgaris]	NA	NA	NA	NA	6.49744	5.31635	5.56815	5.43206	5.20883	5.05198	8.2526	8.63065	9.1857	7.95798	6.66282	7.64972	17.631	15.6566	14.1525	5.84795e-33	1.48898e-32
Bv_014380_hzww	blue	512.995	PREDICTED: uncharacterized protein LOC104885105 [Beta vulgaris subsp. vulgaris]	NA	NA	NA	NA	5.70649	7.73836	6.34709	1.39187	1.76555	1.67071	10.4883	10.5892	9.59505	27.7686	26.5062	24.69	58.6804	56.9367	59.0689	0	0
Bv9_207520_gjxd	blue	512.912	PREDICTED: dof zinc finger protein DOF3.1 [Beta vulgaris subsp. vulgaris]	GO:0003677(DNA binding);GO:0003700(DNA binding transcription factor activity);GO:0005634(nucleus);GO:0006351(transcription, DNA-templated);GO:0006355(regulation of transcription, DNA-templated);GO:0044212(transcription regulatory region DNA binding);GO:0046872(metal ion binding);GO:0048364(root development)	NA	NA	NA	30.1133	28.5247	27.317	20.3275	19.9446	19.9404	42.3481	42.7269	39.7391	40.4896	35.2298	38.0072	80.9732	75.5566	85.8229	1.26666e-118	9.22485e-118
Bv7_165470_hrmu	blue	512.817	PREDICTED: rho GDP-dissociation inhibitor 1 [Beta vulgaris subsp. vulgaris]	GO:0005094(Rho GDP-dissociation inhibitor activity);GO:0005096(GTPase activator activity);GO:0005515(protein binding);GO:0005737(cytoplasm);GO:0009932(cell tip growth);GO:0010053(root epidermal cell differentiation)	NA	NA	NA	31.1011	35.8577	27.4039	27.2117	28.8437	26.7367	22.5751	20.2268	20.8915	22.5422	25.7758	21.2696	13.09	15.5205	14.6336	1.58997e-19	2.95265e-19
Bv6_134710_xdkd	blue	511.102	PREDICTED: salicylic acid-binding protein 2 [Beta vulgaris subsp. vulgaris]	GO:0016787(hydrolase activity)	00460(Cyanoamino acid metabolism)	K20802	EC:4.1.2.10	50.8691	46.7119	45.6888	46.1936	46.6417	45.2476	45.0686	45.2158	42.6483	32.4853	32.0757	32.9273	19.5271	19.5965	19.2177	1.19253e-124	9.07861e-124
Bv5_110750_tfkx	blue	511.032	PREDICTED: pentatricopeptide repeat-containing protein At1g80880, mitochondrial [Beta vulgaris subsp. vulgaris]	GO:0005739(mitochondrion);GO:0008150(biological_process)	NA	NA	NA	2.08862	2.22894	1.635	2.4144	2.28321	1.99776	3.07076	2.64318	2.74675	2.67636	2.56035	3.46364	4.22947	3.92231	4.43448	8.09333e-09	1.08156e-08
Bv6_151920_jaiu	blue	510.7	PREDICTED: uncharacterized protein LOC104897726 [Beta vulgaris subsp. vulgaris]	GO:0005737(cytoplasm)	NA	NA	NA	3.68605	4.12336	3.71372	5.68225	5.14307	5.56228	8.70861	9.65614	8.15711	9.53619	8.77845	9.59346	11.4968	10.462	10.4045	4.03878e-42	1.21439e-41
Bv_004130_fkwc	blue	510.402	PREDICTED: G-type lectin S-receptor-like serine/threonine-protein kinase LECRK3 [Beta vulgaris subsp. vulgaris]	GO:0004674(protein serine/threonine kinase activity);GO:0005886(plasma membrane);GO:0006468(protein phosphorylation)	NA	NA	NA	0.780016	0.939607	0.773541	1.92282	1.91569	2.03102	5.06459	4.69226	5.3047	4.27345	3.49277	3.96467	5.44071	5.39587	5.60704	1.67985e-109	1.13458e-108
Bv2_029350_nihk	blue	510.093	PREDICTED: cellulose synthase A catalytic subunit 3 [UDP-forming] [Beta vulgaris subsp. vulgaris]	GO:0000977(RNA polymerase II regulatory region sequence-specific DNA binding);GO:0005515(protein binding);GO:0005768(endosome);GO:0005794(Golgi apparatus);GO:0005802(trans-Golgi network);GO:0005886(plasma membrane);GO:0006952(defense response);GO:0009506(plasmodesma);GO:0009809(lignin biosynthetic process);GO:0009833(plant-type primary cell wall biogenesis);GO:0009834(plant-type secondary cell wa…	NA	NA	NA	1.05442	1.25873	0.837719	5.43903	5.07837	5.54328	31.6069	32.6248	28.1063	17.3449	18.5078	17.9369	34.7914	36.2141	34.8916	0	0
Bv2_037140_qyjg	blue	510.051	PREDICTED: CBL-interacting serine/threonine-protein kinase 6 [Beta vulgaris subsp. vulgaris]	GO:0004674(protein serine/threonine kinase activity);GO:0005515(protein binding);GO:0005524(ATP binding);GO:0005622(intracellular);GO:0005783(endoplasmic reticulum);GO:0005886(plasma membrane);GO:0007275(multicellular organism development);GO:0009414(response to water deprivation);GO:0009651(response to salt stress);GO:0010540(basipetal auxin transport);GO:0016301(kinase activity);GO:0018105(pept…	NA	NA	NA	4160.98	4122.56	4324.49	3543.98	3631.2	3765.61	2282.97	2476.27	2534.68	2347.94	2411.24	2418.14	1924.96	1986.05	1985.91	3.12223e-56	1.18324e-55
Bv9_203230_uupk	blue	509.769	PREDICTED: uncharacterized protein LOC104902598 isoform X1 [Beta vulgaris subsp. vulgaris];PREDICTED: uncharacterized protein LOC104902598 isoform X2 [Beta vulgaris subsp. vulgaris]	GO:0003674(molecular_function);GO:0005737(cytoplasm);GO:0008150(biological_process);GO:0008150(biological_process)	NA	NA	NA	9.11569	8.52172	11.649	12.269	12.9324	11.3355	10.8265	12.5356	12.9942	18.1163	15.4364	13.2842	23.8046	24.3351	22.3803	7.13103e-21	1.36998e-20
Bv5_119760_mcmm	blue	509.66	hypothetical protein BVRB_5g119760 [Beta vulgaris subsp. vulgaris]	NA	NA	NA	NA	0.506624	0.464344	0.283728	0.659968	0.870079	0.832772	0.870763	0.625333	0.906897	1.05152	1.17446	1.10371	1.41112	1.56532	1.46764	8.58962e-11	1.22536e-10
Bv8_200270_rdid	blue	509.511	0	NA	NA	NA	NA	5.60767	4.59518	4.62538	7.69523	5.35447	6.67634	8.65062	8.06966	8.32876	7.81004	7.57641	6.27712	10.0115	11.7072	11.007	1.37948e-09	1.88857e-09
Bv8_187160_cjmm	blue	509.243	cysteine-rich receptor-like protein kinase 15 [Chenopodium quinoa]	GO:0003674(molecular_function);GO:0005576(extracellular region);GO:0051707(response to other organism)	NA	NA	NA	67.4467	62.3959	67.6085	54.2968	61.6902	60.1436	55.1511	53.2855	53.6137	37.4825	44.4941	42.8543	32.2296	32.8048	32.3019	5.43357e-52	1.92575e-51
Bv1_003320_qfuz	blue	509.191	PREDICTED: abscisic acid receptor PYL9 [Beta vulgaris subsp. vulgaris]	GO:0004864(protein phosphatase inhibitor activity);GO:0005634(nucleus);GO:0005737(cytoplasm);GO:0009738(abscisic acid-activated signaling pathway);GO:0010427(abscisic acid binding);GO:0080163(regulation of protein serine/threonine phosphatase activity)	04016(MAPK signaling pathway - plant);04075(Plant hormone signal transduction)	K14496	NA	7.00187	7.14879	7.15814	6.84503	6.79205	7.71898	10.721	9.84667	9.66433	9.59595	9.02646	9.18188	32.4578	27.5731	30.8304	1.8666e-193	2.25357e-192
Bv4_085270_pjhe	blue	508.848	PREDICTED: uncharacterized protein LOC104891324 [Beta vulgaris subsp. vulgaris]	GO:0005739(mitochondrion);GO:0006412(translation)	03010(Ribosome)	K02895	NA	9.0958	9.14734	9.16856	21.0187	21.3088	22.8361	25.8256	28.6381	23.2812	35.589	34.9577	33.3834	38.6594	41.0485	40.3784	9.13874e-142	7.88024e-141
Bv9_207870_goyq	blue	508.665	hypothetical protein BVRB_9g207870 [Beta vulgaris subsp. vulgaris]	GO:0003723(RNA binding);GO:0003729(mRNA binding);GO:0005737(cytoplasm)	03015(mRNA surveillance pathway)	K14411	NA	6.3416	5.36597	5.93175	3.38979	4.94105	3.56767	3.40814	3.47574	3.11767	5.48016	4.77419	4.46689	0.0001	0.0001	0.0001	6.63366e-55	2.4638e-54
Bv6_127840_ueqm	blue	508.467	PREDICTED: uncharacterized protein At2g23090 [Beta vulgaris subsp. vulgaris]	GO:0003674(molecular_function);GO:0008150(biological_process)	NA	NA	NA	0.40591	0.621346	0.390261	0.95378	0.828963	0.824695	1.23635	1.07482	0.854506	0.767406	0.651604	0.58569	2.39532	2.55553	2.17422	1.11516e-29	2.65321e-29
Bv7_160810_zhqs	blue	508.003	PREDICTED: THO complex subunit 3 [Beta vulgaris subsp. vulgaris]	GO:0000445(THO complex part of transcription export complex);GO:0006406(mRNA export from nucleus)	03040(Spliceosome);03013(RNA transport)	K12880	NA	45.4036	41.5234	44.168	62.2858	56.9437	61.607	72.8717	55.8179	55.8521	73.7333	77.9825	72.6154	100.317	85.7761	95.8531	1.29651e-27	2.94372e-27
Bv5_121460_tiqs	blue	507.648	PREDICTED: uncharacterized protein LOC104894736 [Beta vulgaris subsp. vulgaris]	GO:0003674(molecular_function);GO:0008150(biological_process)	NA	NA	NA	59.6348	54.5108	58.6492	46.4578	47.3226	53.1676	47.0822	45.0153	47.8456	57.4268	50.6535	53.0341	19.5646	20.3769	20.1924	9.33152e-100	5.79146e-99
Bv8_193690_atna	blue	507.622	PREDICTED: uncharacterized protein LOC104901975 [Beta vulgaris subsp. vulgaris]	GO:0005634(nucleus)	04144(Endocytosis)	K05747	NA	17.1239	16.7147	20.1344	25.1371	27.1501	24.9596	26.9569	24.5856	24.8961	30.8356	34.2976	31.2307	35.9527	41.2076	39.5428	1.97955e-27	4.48061e-27
Bv2_032070_frcn	blue	507.447	PREDICTED: bark storage protein A [Beta vulgaris subsp. vulgaris]	GO:0005886(plasma membrane)	NA	NA	NA	1.36717	0.757563	1.23114	0.0001	0.69231	0.989503	2.8431	1.83546	1.67154	2.87648	3.69518	3.23256	9.97154	11.0592	8.66211	1.26722e-17	2.22917e-17
Bv6_141730_wswo	blue	507.316	hypothetical protein BVRB_6g141730 [Beta vulgaris subsp. vulgaris]	NA	NA	NA	NA	3.33982	3.23744	3.8704	5.43928	4.9335	3.83615	5.32857	4.29822	4.61946	6.15988	7.21963	7.65788	11.17	9.33314	10.4674	5.18172e-25	1.1076e-24
Bv3_065730_tkwc	blue	507.144	PREDICTED: probable pectinesterase/pectinesterase inhibitor 51, partial [Beta vulgaris subsp. vulgaris]	GO:0030599(pectinesterase activity);GO:0046910(pectinesterase inhibitor activity);GO:0071944(cell periphery)	00040(Pentose and glucuronate interconversions)	K01051	EC:3.1.1.11	0.768653	1.59162	1.37744	5.84867	7.14733	6.04324	12.4012	11.4227	8.71909	6.14335	6.10541	6.60749	14.5649	15.1089	12.2973	1.0714e-74	5.16093e-74
Bv2_041600_hwqq	blue	507.078	hypothetical protein BVRB_2g041600 [Beta vulgaris subsp. vulgaris]	GO:0005215(transporter activity);GO:0005886(plasma membrane);GO:0006857(oligopeptide transport);GO:0009705(plant-type vacuole membrane);GO:0015706(nitrate transport);GO:0016020(membrane);GO:0016021(integral component of membrane);GO:0055085(transmembrane transport);GO:0080054(low-affinity nitrate transmembrane transporter activity)	NA	NA	NA	0.20193	0.222136	0.313825	0.08207	0.690036	0.316873	0.861123	0.707848	0.758322	0.709396	0.781344	0.644448	1.4491	1.28749	1.25629	3.17528e-05	3.73775e-05
Bv8_199210_omsf	blue	506.521	PREDICTED: IQ domain-containing protein IQM1 [Beta vulgaris subsp. vulgaris]	GO:0005516(calmodulin binding);GO:0005634(nucleus);GO:0005737(cytoplasm)	00500(Starch and sucrose metabolism)	K01214	EC:3.2.1.68	1356.23	1307.6	1324.83	738.861	729.773	724.135	770.023	770.376	765.503	838.785	836.053	850.366	449.031	454.339	444.829	1.16921e-163	1.17847e-162
Bv9_225100_wroo	blue	506.444	PREDICTED: F-box/kelch-repeat protein At3g23880 isoform X1 [Beta vulgaris subsp. vulgaris]	GO:0004842(ubiquitin-protein transferase activity);GO:0019005(SCF ubiquitin ligase complex);GO:0031146(SCF-dependent proteasomal ubiquitin-dependent protein catabolic process)	NA	NA	NA	386.805	373.378	366.518	531.687	506.722	487.316	684.635	674.191	653.695	425.354	415.123	413.919	1010.81	1019.88	992.781	1.11014e-174	1.1944e-173
Bv8_194520_eojt	blue	506.041	PREDICTED: uncharacterized protein LOC104902042 [Beta vulgaris subsp. vulgaris]	GO:0005794(Golgi apparatus);GO:0005886(plasma membrane);GO:0008168(methyltransferase activity);GO:0016021(integral component of membrane);GO:0032259(methylation)	NA	NA	NA	15.3295	16.8776	17.7821	21.5567	25.4273	22.0608	24.7767	26.8257	29.6241	34.3787	29.4122	27.3365	34.9079	40.6495	36.4899	4.48952e-25	9.6159e-25
Bv3_064770_tnya	blue	504.984	PREDICTED: uncharacterized protein LOC104889696 isoform X3 [Beta vulgaris subsp. vulgaris]	NA	NA	NA	NA	0.0813388	0.0844123	0.0970408	0.115316	0.277041	0.259121	0.738574	0.639792	0.721421	0.190796	0.616462	0.504086	1.51827	1.24798	1.05204	5.95802e-15	9.67465e-15
Bv5_123860_xeht	blue	504.953	PREDICTED: cytochrome P450 78A5 [Beta vulgaris subsp. vulgaris]	GO:0016020(membrane);GO:0016709(oxidoreductase activity, acting on paired donors, with incorporation or reduction of molecular oxygen, NAD(P)H as one donor, and incorporation of one atom of oxygen);GO:0044550(secondary metabolite biosynthetic process)	NA	NA	NA	4.37025	3.93682	4.99389	2.08675	1.07717	1.42304	7.05949	7.13919	7.11293	7.74074	7.67431	6.99836	18.9	18.5117	20.5588	3.88487e-118	2.81523e-117
Bv9_209490_khwk	blue	504.939	PREDICTED: uncharacterized protein LOC104903441 [Beta vulgaris subsp. vulgaris];hypothetical protein BVRB_9g209490 isoform B [Beta vulgaris subsp. vulgaris]	NA	NA	NA	NA	31.7314	30.9264	30.031	38.1028	32.8249	32.4614	51.8961	50.2439	48.2845	35.4494	34.9563	35.3366	64.8163	63.5936	64.5729	1.50176e-52	5.38584e-52
Bv9_222160_ijdr	blue	504.803	0	NA	NA	NA	NA	49.9781	47.781	51.2768	86.2508	81.6455	86.9217	88.7369	74.2517	87.2188	68.0907	54.8813	65.6323	163.299	171.067	188.706	4.21304e-109	2.83242e-108
Bv4_074020_rrhz	blue	504.178	PREDICTED: uncharacterized protein LOC104890117 [Beta vulgaris subsp. vulgaris]	GO:0003674(molecular_function);GO:0005575(cellular_component);GO:0008150(biological_process)	NA	NA	NA	8.39115	8.80361	8.82593	12.7825	11.679	13.175	10.9644	11.9588	12.745	15.1719	13.9302	15.2793	16.7943	18.3993	18.8264	6.09153e-40	1.76668e-39
Bv1_003370_nxxs	blue	504.122	PREDICTED: polyubiquitin-like [Beta vulgaris subsp. vulgaris]	GO:0005634(nucleus);GO:0005737(cytoplasm);GO:0006464(cellular protein modification process);GO:0007568(aging);GO:0009751(response to salicylic acid)	NA	NA	NA	25.3976	24.3565	25.3586	100.513	103.536	101.534	238.661	269.821	260.547	98.0343	97.9719	96.8604	326.199	336.006	332.249	0	0
Bv8_183260_hjci	blue	503.848	hypothetical protein BVRB_8g183260 [Beta vulgaris subsp. vulgaris]	NA	NA	NA	NA	0.490241	0.423709	0.299461	1.59454	1.56162	0.900059	1.27116	2.07268	1.2382	0.925691	0.993915	1.72547	6.24517	7.68288	6.40876	5.36669e-29	1.25964e-28
Bv2_045060_nsig	blue	503.657	PREDICTED: protein GLUTAMINE DUMPER 3 [Beta vulgaris subsp. vulgaris]	GO:0005515(protein binding);GO:0005634(nucleus);GO:0005886(plasma membrane);GO:0010585(glutamine secretion);GO:0016020(membrane);GO:0016021(integral component of membrane);GO:0080143(regulation of amino acid export)	NA	NA	NA	0.48452	0.312727	0.487008	1.6457	1.72968	1.88574	1.57889	1.82068	1.5396	0.905016	0.957049	0.957385	3.16649	3.24559	3.51544	5.10966e-57	1.96427e-56
Bv1_003720_pmrz	blue	503.492	PREDICTED: uncharacterized protein LOC104886757 [Beta vulgaris subsp. vulgaris]	GO:0000902(cell morphogenesis)	NA	NA	NA	4.57785	4.41115	4.10773	5.88744	6.95282	6.91487	7.13123	6.8458	6.21776	8.09892	7.64125	8.88864	10.5543	10.4563	9.08105	6.48984e-20	1.21638e-19
Bv_009010_danm	blue	503.477	hypothetical protein BVRB_009010 [Beta vulgaris subsp. vulgaris]	GO:0003723(RNA binding);GO:0004525(ribonuclease III activity);GO:0005634(nucleus);GO:0005737(cytoplasm);GO:0016442(RISC complex);GO:0030422(production of siRNA involved in RNA interference)	NA	NA	NA	8.28511	8.69925	9.57148	14.7937	16.4964	15.3493	13.2721	13.9791	14.12	15.9492	15.9122	15.6255	19.2003	21.5922	20.6826	1.92852e-43	5.94371e-43
Bv2_047480_nrwu	blue	503.219	PREDICTED: crossover junction endonuclease MUS81 isoform X1 [Beta vulgaris subsp. vulgaris];hypothetical protein BVRB_2g047480 isoform B [Beta vulgaris subsp. vulgaris];hypothetical protein BVRB_2g047480 isoform C [Beta vulgaris subsp. vulgaris];hypothetical protein BVRB_2g047480 isoform E [Beta vulgaris subsp. vulgaris]	GO:0000712(resolution of meiotic recombination intermediates);GO:0000724(double-strand break repair via homologous recombination);GO:0000727(double-strand break repair via break-induced replication);GO:0000794(condensed nuclear chromosome);GO:0003676(nucleic acid binding);GO:0003677(DNA binding);GO:0004519(endonuclease activity);GO:0005634(nucleus);GO:0005730(nucleolus);GO:0006281(DNA repair);GO:…	03440(Homologous recombination);03440(Homologous recombination)	K08991	EC:3.1.22.-	14.1373	12.2649	15.9399	10.456	10.3003	9.69777	27.2109	24.2085	25.327	28.464	35.1912	32.3123	48.5943	43.6204	44.4619	4.12256e-97	2.48782e-96
Bv2_030260_fudp	blue	503.137	PREDICTED: uncharacterized protein LOC104908703 [Beta vulgaris subsp. vulgaris]	GO:0003674(molecular_function);GO:0005634(nucleus);GO:0008150(biological_process)	NA	NA	NA	245.984	241.68	271.237	258.116	272.142	275.339	200.434	212.209	219.429	237.927	235.709	234.542	98.9066	89.8363	97.281	1.69905e-124	1.2914e-123
Bv4_083840_imog	blue	503.004	PREDICTED: CRC domain-containing protein TSO1 isoform X1 [Beta vulgaris subsp. vulgaris]	GO:0003700(DNA binding transcription factor activity);GO:0005634(nucleus);GO:0009934(regulation of meristem structural organization);GO:0046872(metal ion binding);GO:0048444(floral organ morphogenesis);GO:0051302(regulation of cell division)	NA	NA	NA	20.4224	20.5116	20.1135	15.3372	15.7395	15.9149	30.917	28.6684	29.8978	30.3238	32.6633	30.8254	46.8716	42.4161	42.8542	2.53688e-139	2.15521e-138
Bv2_039840_tcnk	blue	502.78	hypothetical protein BVRB_2g039840 isoform B [Beta vulgaris subsp. vulgaris]	NA	NA	NA	NA	0.8012	0.921887	0.614907	1.36703	1.13569	1.19244	1.28459	0.781039	0.892334	1.49706	1.19198	1.90491	4.00524	4.05719	4.04123	7.37152e-25	1.57107e-24
Bv8_194330_xwnf	blue	502.432	PREDICTED: uncharacterized protein LOC104902452 [Beta vulgaris subsp. vulgaris]	NA	NA	NA	NA	0.0001	0.650861	0.0001	4.41946	3.28091	4.79396	1.92461	2.24341	2.75486	2.79872	3.56928	2.49341	10.1057	8.23405	8.81645	5.17984e-14	8.18348e-14
Bv_010660_dixi	blue	502.42	PREDICTED: uncharacterized protein LOC104884640 [Beta vulgaris subsp. vulgaris]	GO:0002098(tRNA wobble uridine modification);GO:0003924(GTPase activity);GO:0005525(GTP binding);GO:0005622(intracellular);GO:0005737(cytoplasm);GO:0006400(tRNA modification);GO:0030488(tRNA methylation)	NA	NA	NA	1.7931	1.56141	1.72911	4.06458	3.84178	3.56176	2.95126	3.21736	3.33971	2.98072	3.46065	2.84989	5.02709	5.56576	5.56846	1.54382e-37	4.2799e-37
Bv5_125320_knac	blue	502.287	PREDICTED: myb-like protein Q [Beta vulgaris subsp. vulgaris]	GO:0000981(RNA polymerase II transcription factor activity, sequence-specific DNA binding);GO:0001135(transcription factor activity, RNA polymerase II transcription factor recruiting);GO:0003677(DNA binding);GO:0003700(DNA binding transcription factor activity);GO:0005515(protein binding);GO:0005634(nucleus);GO:0006351(transcription, DNA-templated);GO:0006355(regulation of transcription, DNA-temp…	NA	NA	NA	9.70747	10.4591	9.9331	8.22499	7.70669	8.31219	5.93986	6.21488	5.79018	8.48929	7.87959	8.28022	5.22157	4.1604	5.04812	7.86134e-28	1.79586e-27
Bv4_084280_wqeg	blue	502.111	PREDICTED: B3 domain-containing protein REM16 isoform X2 [Beta vulgaris subsp. vulgaris]	GO:0003677(DNA binding);GO:0003700(DNA binding transcription factor activity);GO:0005634(nucleus);GO:0005773(vacuole);GO:0006351(transcription, DNA-templated);GO:0006355(regulation of transcription, DNA-templated)	NA	NA	NA	0.317906	0.381067	0.22997	0.50889	0.282236	0.331404	0.944085	0.705518	1.12623	0.813852	0.837102	0.733177	1.54262	2.04111	1.43368	1.08749e-14	1.75178e-14
Bv4_085920_zayn	blue	502.015	PREDICTED: CLAVATA3/ESR (CLE)-related protein 1 [Beta vulgaris subsp. vulgaris]	NA	NA	NA	NA	0.619459	0.263569	0.499588	0.359217	0.826678	0.572846	1.1558	0.792925	0.326292	1.97824	1.94234	1.95948	3.60916	3.69798	3.83744	2.17049e-11	3.15831e-11
Bv3_049410_qzxk	blue	501.923	PREDICTED: 1-aminocyclopropane-1-carboxylate oxidase homolog 1 [Beta vulgaris subsp. vulgaris]	GO:0051213(dioxygenase activity)	00402(Benzoxazinoid biosynthesis)	K13229	EC:1.14.11.59	1.31198	1.6235	2.08559	4.39073	3.79021	4.34887	25.3361	28.1688	25.3698	12.0851	12.4718	10.456	32.4882	32.2342	33.6255	0	0
Bv8_184380_zguo	blue	501.821	PREDICTED: trihelix transcription factor GT-2 [Beta vulgaris subsp. vulgaris]	GO:0003677(DNA binding);GO:0003700(DNA binding transcription factor activity);GO:0005634(nucleus);GO:0006351(transcription, DNA-templated);GO:0006355(regulation of transcription, DNA-templated)	NA	NA	NA	9.66338	10.459	9.80797	9.02139	6.84372	9.01465	14.1727	15.0417	13.928	15.7114	13.6842	13.7225	21.8156	19.4544	20.8607	4.07255e-19	7.46719e-19
Bv8_198970_zomg	blue	501.684	hypothetical protein BVRB_8g198970 [Beta vulgaris subsp. vulgaris]	GO:0005388(calcium-transporting ATPase activity);GO:0005887(integral component of plasma membrane);GO:0043231(intracellular membrane-bounded organelle)	NA	NA	NA	414.495	402.568	402.512	438.12	465.999	444.734	308.283	327.359	311.686	344.254	373.582	384.68	143.777	148.189	142.774	4.64526e-174	4.9697e-173
Bv6_148680_pnhi	blue	501.488	PREDICTED: polygalacturonase At1g48100 [Beta vulgaris subsp. vulgaris]	GO:0004650(polygalacturonase activity);GO:0005576(extracellular region);GO:0005975(carbohydrate metabolic process)	00040(Pentose and glucuronate interconversions)	K01184	EC:3.2.1.15	1.59692	1.64759	1.50914	2.02141	1.49964	1.55389	4.33321	3.30212	4.67708	5.27807	4.81223	5.40733	6.59559	6.36655	6.58139	6.21395e-55	2.30972e-54
Bv5_126250_caza	blue	501.432	PREDICTED: bifunctional aspartate aminotransferase and glutamate/aspartate-prephenate aminotransferase [Beta vulgaris subsp. vulgaris]	GO:0004069(L-aspartate:2-oxoglutarate aminotransferase activity);GO:0009095(aromatic amino acid family biosynthetic process, prephenate pathway);GO:0030170(pyridoxal phosphate binding);GO:0033853(aspartate-prephenate aminotransferase activity);GO:0033854(glutamate-prephenate aminotransferase activity);GO:0042802(identical protein binding)	00350(Tyrosine metabolism);00360(Phenylalanine metabolism);00400(Phenylalanine, tyrosine and tryptophan biosynthesis);00950(Isoquinoline alkaloid biosynthesis);00960(Tropane, piperidine and pyridine alkaloid biosynthesis)	K15849	EC:2.6.1.1;EC:2.6.1.78	104.135	98.9953	101.944	72.1719	68.1521	71.0872	71.988	73.588	70.4921	49.6373	50.5703	49.5511	35.8079	36.8908	35.3141	1.44326e-185	1.6692e-184
Bv3_064500_qqsq	blue	501.091	hypothetical protein BVRB_3g064500 [Beta vulgaris subsp. vulgaris]	NA	NA	NA	NA	0.609031	0.501937	0.537425	0.554405	0.433543	0.468231	0.584318	1.16037	0.88974	0.912186	1.49827	1.53533	3.47379	2.77712	3.06012	9.99719e-20	1.86583e-19
Bv2_028010_uejs	blue	500.746	PREDICTED: protein COBRA [Beta vulgaris subsp. vulgaris]	GO:0003674(molecular_function);GO:0005886(plasma membrane);GO:0009505(plant-type cell wall);GO:0009651(response to salt stress);GO:0009825(multidimensional cell growth);GO:0009897(external side of plasma membrane);GO:0009930(longitudinal side of cell surface);GO:0010215(cellulose microfibril organization);GO:0016021(integral component of membrane);GO:0016049(cell growth);GO:0016328(lateral plasma…	NA	NA	NA	41.3003	40.6618	43.4803	40.7399	37.934	39.1851	16.8417	17.2124	18.0111	19.2689	17.5063	19.3209	10.5088	10.7211	9.95831	8.29705e-285	1.60193e-283
Bv2_037610_xfyn	blue	500.704	PREDICTED: uncharacterized protein LOC104887013 [Beta vulgaris subsp. vulgaris]	GO:0003674(molecular_function);GO:0008150(biological_process);GO:0016021(integral component of membrane)	NA	NA	NA	0.736339	0.864418	0.751329	0.650772	0.495452	0.666095	0.820934	0.977315	1.04146	1.46992	1.46251	1.23953	2.51703	2.34145	2.302	2.79719e-29	6.60297e-29
Bv2_030020_zwop	blue	500.38	PREDICTED: phosphoglucan phosphatase LSF2, chloroplastic [Beta vulgaris subsp. vulgaris]	GO:0009507(chloroplast)	NA	NA	NA	5.16442	4.69115	5.26895	5.59237	5.36762	5.8456	6.37629	6.13352	6.37082	6.86254	5	5.55777	10.9714	11.8994	12.4788	9.44702e-35	2.48779e-34
Bv8_192930_jdmz	blue	500.228	hypothetical protein BVRB_8g192930 [Beta vulgaris subsp. vulgaris]	GO:0003674(molecular_function);GO:0005634(nucleus);GO:0008150(biological_process)	NA	NA	NA	6.8951	8.20454	7.41677	16.418	13.0523	19.1322	10.3974	12.4541	14.8209	13.5477	11.175	14.6772	32.4519	33.2875	36.2686	3.16536e-48	1.05636e-47
Bv8_197680_cuiy	blue	500.15	PREDICTED: mitogen-activated protein kinase kinase 6 [Beta vulgaris subsp. vulgaris]	GO:0005737(cytoplasm)	04626(Plant-pathogen interaction)	K04368	EC:2.7.12.2	19.9257	18.3359	14.7606	20.2616	23.7401	20.7129	35.0233	32.5998	32.6262	30.0445	29.6453	25.8174	38.9133	41.8993	35.0617	2.43772e-24	5.13206e-24
Bv5_119040_rogd	blue	499.043	PREDICTED: UDP-glycosyltransferase 74G1-like isoform X1 [Beta vulgaris subsp. vulgaris]	GO:0009813(flavonoid biosynthetic process);GO:0043231(intracellular membrane-bounded organelle);GO:0052696(flavonoid glucuronidation);GO:0080043(quercetin 3-O-glucosyltransferase activity);GO:0080044(quercetin 7-O-glucosyltransferase activity)	NA	NA	NA	189.331	189.782	200.951	221.595	224.965	226.405	156.834	163.806	167.901	145.714	143.306	141.164	59.9744	62.9088	62.4567	1.23883e-263	2.15902e-262
Bv5_110360_gihh	blue	498.938	PREDICTED: cytochrome P450 94B3 [Beta vulgaris subsp. vulgaris]	GO:0005506(iron ion binding);GO:0009507(chloroplast);GO:0009611(response to wounding);GO:0009694(jasmonic acid metabolic process);GO:0016021(integral component of membrane);GO:0016705(oxidoreductase activity, acting on paired donors, with incorporation or reduction of molecular oxygen);GO:0019825(oxygen binding);GO:0020037(heme binding);GO:0052694(jasmonoyl-isoleucine-12-hydroxylase activity);GO:…	NA	NA	NA	155.712	161.46	154.979	154.273	152.911	157.679	110.558	105.736	116.609	94.4928	89.6153	97.2169	75.9043	71.0637	77.6689	3.10478e-92	1.78239e-91
Bv7_167140_uxow	blue	498.715	PREDICTED: 3-ketoacyl-CoA thiolase 2, peroxisomal [Beta vulgaris subsp. vulgaris]	GO:0003988(acetyl-CoA C-acyltransferase activity);GO:0005730(nucleolus);GO:0005739(mitochondrion);GO:0005774(vacuolar membrane);GO:0005777(peroxisome);GO:0005829(cytosol);GO:0006635(fatty acid beta-oxidation);GO:0009507(chloroplast);GO:0009514(glyoxysome);GO:0009611(response to wounding);GO:0009695(jasmonic acid biosynthetic process);GO:0009789(positive regulation of abscisic acid-activated signa…	00071(Fatty acid degradation);00592(alpha-Linolenic acid metabolism);01040(Biosynthesis of unsaturated fatty acids);00280(Valine, leucine and isoleucine degradation);04146(Peroxisome)	K07513	EC:2.3.1.16	29.4987	27.0496	31.142	21.2505	21.6778	24.7367	20.5822	19.2584	14.819	10.2594	8.71502	10.8446	4.29479	4.9513	5.28736	6.37548e-81	3.27825e-80
Bv3_065790_nxca	blue	498.404	PREDICTED: uncharacterized protein LOC104889802 [Beta vulgaris subsp. vulgaris]	GO:0001708(cell fate specification);GO:0005634(nucleus);GO:0005737(cytoplasm);GO:0009793(embryo development ending in seed dormancy);GO:0009926(auxin polar transport);GO:0010305(leaf vascular tissue pattern formation);GO:0019827(stem cell population maintenance);GO:0048364(root development)	NA	NA	NA	13.153	14.1716	13.4374	13.1429	12.721	13.4854	25.0856	24.5188	22.2606	13.8184	16.626	15.2721	40.7483	39.8878	43.7216	1.3884e-131	1.11701e-130
Bv_006750_gotj	blue	498.297	hypothetical protein BVRB_006750 [Beta vulgaris subsp. vulgaris]	GO:0005794(Golgi apparatus);GO:0006004(fucose metabolic process);GO:0006486(protein glycosylation);GO:0016021(integral component of membrane);GO:0016757(transferase activity, transferring glycosyl groups)	NA	NA	NA	0.0001	0.0803183	0.0001	0.0001	0.0001	0.20142	0.889745	0.0001	0.766097	0.539936	0.580586	0.41045	1.65587	1.75118	1.88201	0.000368287	0.000417746
Bv_007660_czif	blue	498.157	PREDICTED: uncharacterized protein LOC104884324 [Beta vulgaris subsp. vulgaris]	GO:0003674(molecular_function);GO:0009507(chloroplast);GO:0009737(response to abscisic acid);GO:0016021(integral component of membrane)	NA	NA	NA	11.6149	12.0662	13.8026	11.3101	12.5272	13.9776	18.2064	21.9979	25.3816	16.6923	15.9012	18.4589	31.5937	28.8922	33.2708	3.14749e-34	8.20664e-34
Bv6_131210_rmnx	blue	497.791	PREDICTED: uncharacterized protein LOC104895246 [Beta vulgaris subsp. vulgaris]	GO:0003674(molecular_function);GO:0016021(integral component of membrane);GO:0080167(response to karrikin)	NA	NA	NA	8.00677	7.52274	9.42459	13.3663	12.2061	12.3011	11.6507	13.9027	15.8335	11.073	10.262	10.7018	41.7065	41.857	47.248	1.3746e-185	1.59077e-184
Bv7_174890_owag	blue	497.17	PREDICTED: BTB/POZ domain-containing protein At5g60050 [Beta vulgaris subsp. vulgaris]	GO:0009507(chloroplast);GO:0016567(protein ubiquitination)	NA	NA	NA	14.6082	13.967	14.3468	11.6983	11.1484	13.3193	19.2309	21.3713	19.9344	21.5204	18.7765	18.3806	32.2681	27.0869	29.0639	5.07774e-38	1.42097e-37
Bv9_213820_omfd	blue	496.942	PREDICTED: uncharacterized protein LOC104903903 [Beta vulgaris subsp. vulgaris]	GO:0004497(monooxygenase activity);GO:0044550(secondary metabolite biosynthetic process)	NA	NA	NA	35.9936	37.2855	34.3991	62.9598	61.5838	61.2908	44.625	45.9224	41.777	66.6809	69.5455	64.4596	111.501	101.466	110.514	8.71742e-150	7.96188e-149
Bv_019750_fzzy	blue	496.87	hypothetical protein BVRB_019750, partial [Beta vulgaris subsp. vulgaris]	NA	NA	NA	NA	9.89291	9.29841	8.73066	13.0012	13.3276	12.8193	16.1797	14.5157	14.2059	13.9797	14.2615	14.1614	21.9777	20.6065	16.1964	6.96381e-30	1.66561e-29
Bv2_042860_ixzz	blue	496.427	PREDICTED: transcription factor HY5 [Beta vulgaris subsp. vulgaris]	GO:0000977(RNA polymerase II regulatory region sequence-specific DNA binding);GO:0003677(DNA binding);GO:0003690(double-stranded DNA binding);GO:0003700(DNA binding transcription factor activity);GO:0005515(protein binding);GO:0005634(nucleus);GO:0006351(transcription, DNA-templated);GO:0006355(regulation of transcription, DNA-templated);GO:0009585(red, far-red light phototransduction);GO:0009640…	04712(Circadian rhythm - plant)	K16241	NA	9.47426	8.25027	9.02317	8.31575	6.88944	7.4688	9.08943	9.17994	10.4273	13.8393	11.6943	13.2257	32.8999	32.5895	33.2653	6.25158e-170	6.53352e-169
Bv8_186150_ykej	blue	496.243	PREDICTED: F-box/kelch-repeat protein At3g06240 [Beta vulgaris subsp. vulgaris]	GO:0004842(ubiquitin-protein transferase activity);GO:0019005(SCF ubiquitin ligase complex);GO:0031146(SCF-dependent proteasomal ubiquitin-dependent protein catabolic process)	NA	NA	NA	7.91864	9.36551	9.32802	12.0471	13.7644	13.6685	20.3167	23.1533	23.5627	15.7099	20.4015	21.8404	28.3239	23.8763	27.0455	4.39834e-35	1.16652e-34
Bv5_112030_tgwt	blue	495.598	hypothetical protein BVRB_7g180720 [Beta vulgaris subsp. vulgaris]	NA	NA	NA	NA	0.275589	0.111045	0.203344	0.473779	0.494307	0.325472	0.964771	0.842249	1.03355	0.686859	0.633291	0.619737	1.01787	1.14909	1.02118	6.99401e-13	1.06815e-12
Bv2_035880_yyii	blue	495.534	PREDICTED: uncharacterized protein LOC104886785 [Beta vulgaris subsp. vulgaris]	NA	NA	NA	NA	9.46982	8.31515	9.57185	14.3992	12.976	11.4591	10.795	12.545	11.0701	13.2186	12.8533	14.6045	18.7905	19.2313	18.0889	8.65899e-17	1.48804e-16
Bv1_004180_unnj	blue	495.42	hypothetical protein BVRB_1g004180 [Beta vulgaris subsp. vulgaris]	NA	NA	NA	NA	1.6378	1.64426	1.34993	17.0836	19.1792	19.7221	8.55897	10.8689	9.20874	11.9209	10.7832	9.87146	36.9423	37.4967	35.6199	0	0
Bv_012480_pxer	blue	495.321	PREDICTED: ribonuclease H2 subunit A [Beta vulgaris subsp. vulgaris]	GO:0004523(RNA-DNA hybrid ribonuclease activity);GO:0006298(mismatch repair);GO:0032299(ribonuclease H2 complex);GO:0043137(DNA replication, removal of RNA primer)	03030(DNA replication)	K10743	EC:3.1.26.4	3.45471	3.27455	3.86505	5.21983	5.32638	5.16245	7.23623	7.29235	7.43624	9.60437	9.79927	8.56669	10.1548	10.4107	10.1895	1.43893e-96	8.63952e-96
Bv5_125610_jtzz	blue	494.947	PREDICTED: cinnamoyl-CoA reductase-like SNL6 [Beta vulgaris subsp. vulgaris]	GO:0005575(cellular_component);GO:0009809(lignin biosynthetic process);GO:0016621(cinnamoyl-CoA reductase activity);GO:0080167(response to karrikin)	00940(Phenylpropanoid biosynthesis)	K09753	EC:1.2.1.44	22.5182	18.2862	19.452	18.6411	16.2404	15.3648	11.5866	13.9343	12.8365	17.5898	16.8068	17.8473	6.13962	7.61575	5.84033	4.92704e-40	1.43157e-39
Bv3_064490_qngx	blue	494.651	hypothetical protein BVRB_3g064490 [Beta vulgaris subsp. vulgaris]	NA	NA	NA	NA	0.45711	0.503378	0.600505	0.381009	0.370273	0.2633	0.722395	0.807755	0.71358	1.94805	1.65335	1.36213	3.28169	3.56342	2.98523	2.06797e-55	7.75194e-55
Bv9_203380_dsry	blue	494.485	PREDICTED: uncharacterized protein LOC104902614 [Beta vulgaris subsp. vulgaris]	GO:0003674(molecular_function);GO:0008150(biological_process);GO:0009507(chloroplast)	NA	NA	NA	3.61348	2.35296	3.44593	4.90419	3.80375	3.9254	5.14644	4.43528	4.77793	6.50189	6.43332	6.40646	8.98234	7.27172	8.09461	2.52074e-12	3.78161e-12
Bv1_023000_smrx	blue	494.426	PREDICTED: ubiquitin carboxyl-terminal hydrolase 2 isoform X1 [Beta vulgaris subsp. vulgaris]	GO:0004843(thiol-dependent ubiquitin-specific protease activity);GO:0005634(nucleus);GO:0006511(ubiquitin-dependent protein catabolic process);GO:0008270(zinc ion binding);GO:0016579(protein deubiquitination);GO:0036459(thiol-dependent ubiquitinyl hydrolase activity)	NA	NA	NA	1.65925	1.84168	1.33681	2.13014	2.13807	2.11941	2.50782	4.45583	4.31752	6.10549	6.46186	5.7753	8.50494	7.60698	7.97997	6.03817e-37	1.65485e-36
Bv5_106110_proq	blue	494.159	PREDICTED: uncharacterized protein LOC104892927 [Beta vulgaris subsp. vulgaris]	GO:0003674(molecular_function);GO:0008150(biological_process)	NA	NA	NA	87.9383	86.9808	96.4883	107.029	102.634	101.416	65.2843	69.7537	72.1472	80.0481	67.5767	70.6837	29.0516	24.2986	25.4064	1.81353e-134	1.48936e-133
Bv3_056120_eehf	blue	494.082	PREDICTED: uncharacterized protein LOC104888705 [Beta vulgaris subsp. vulgaris]	GO:0003674(molecular_function);GO:0005634(nucleus);GO:0008150(biological_process)	NA	NA	NA	13.7615	14.0777	16.5457	19.5358	19.0168	19.8082	30.1923	28.0188	29.4527	24.1749	22.3369	22.5312	32.0106	29.0933	30.8326	1.30122e-56	4.96398e-56
Bv9_224610_dduj	blue	494.082	PREDICTED: lysM domain receptor-like kinase 3 [Beta vulgaris subsp. vulgaris]	GO:0004675(transmembrane receptor protein serine/threonine kinase activity);GO:0005886(plasma membrane);GO:0006468(protein phosphorylation);GO:0006952(defense response);GO:0007166(cell surface receptor signaling pathway);GO:0009737(response to abscisic acid);GO:0009738(abscisic acid-activated signaling pathway);GO:0009789(positive regulation of abscisic acid-activated signaling pathway);GO:001630…	NA	NA	NA	46.2084	38.4866	45.6673	60.3442	60.9063	62.4318	83.8555	83.1723	87.7158	98.9625	102.869	106.315	113.301	107.441	113.792	1.38905e-107	9.20808e-107
Bv9_224770_afwz	blue	494.08	PREDICTED: histidine-containing phosphotransfer protein 4 [Beta vulgaris subsp. vulgaris]	GO:0000160(phosphorelay signal transduction system);GO:0005634(nucleus);GO:0005737(cytoplasm);GO:0009736(cytokinin-activated signaling pathway);GO:0009927(histidine phosphotransfer kinase activity);GO:0016310(phosphorylation);GO:0043424(protein histidine kinase binding)	04075(Plant hormone signal transduction)	K14490	NA	9.83872	9.97273	7.51143	7.58649	5.39806	6.01104	11.3283	10.3754	12.0249	16.1358	14.4705	15.9294	26.3145	25.4167	25.3205	2.55396e-42	7.71105e-42
Bv7_178370_zkfo	blue	493.992	hypothetical protein BVRB_7g178370 [Beta vulgaris subsp. vulgaris]	GO:0007165(signal transduction)	NA	NA	NA	0.171261	0.299709	0.527661	0.0001	0.0001	0.0665994	1.27076	1.74456	1.77834	3.98071	3.06126	3.9841	6.82583	5.4951	5.66794	6.82118e-75	3.29245e-74
Bv8_197970_cpyp	blue	493.279	PREDICTED: zinc finger CCCH domain-containing protein 20 [Beta vulgaris subsp. vulgaris]	GO:0003676(nucleic acid binding);GO:0003677(DNA binding);GO:0003700(DNA binding transcription factor activity);GO:0005634(nucleus);GO:0005886(plasma membrane);GO:0006355(regulation of transcription, DNA-templated);GO:0006979(response to oxidative stress);GO:0046872(metal ion binding)	NA	NA	NA	117.853	110.431	121.586	564.482	470.689	535.669	499.066	431.074	464.219	336.111	308.385	324.716	833.163	739.703	828.349	3.36077e-250	5.47973e-249
Bv3_059060_hjgm	blue	493.119	PREDICTED: 2-alkenal reductase (NADP(+)-dependent) [Beta vulgaris subsp. vulgaris]	GO:0005737(cytoplasm);GO:0005829(cytosol);GO:0005886(plasma membrane);GO:0006979(response to oxidative stress);GO:0032440(2-alkenal reductase [NAD(P)] activity);GO:0055114(oxidation-reduction process)	NA	NA	NA	5.36442	4.91704	5.4077	10.1003	10.9609	8.83279	8.07814	7.26169	6.99468	9.63217	9.80807	12.3685	17.147	18.2442	16.5389	1.52089e-47	5.01216e-47
Bv3_062670_axdx	blue	493.004	hypothetical protein BVRB_3g062670 [Beta vulgaris subsp. vulgaris]	GO:0003674(molecular_function);GO:0008150(biological_process);GO:0016021(integral component of membrane)	00240(Pyrimidine metabolism)	K01520	EC:3.6.1.23	3.76618	4.20991	3.76418	7.07514	7.77008	8.1872	10.9598	9.5672	9.58437	13.7508	12.3026	12.8347	14.5797	14.5769	14.0428	5.18991e-93	3.0067e-92
Bv8_196380_nsaq	blue	492.515	PREDICTED: uncharacterized protein LOC104902202 [Beta vulgaris subsp. vulgaris]	GO:0003674(molecular_function);GO:0008150(biological_process);GO:0009507(chloroplast)	NA	NA	NA	12.1868	12.2093	12.7246	24.1593	27.9914	25.7883	23.9032	26.5219	24.3975	22.2069	21.1696	22.1561	32.6987	33.5576	33.2511	2.86165e-56	1.08579e-55
Bv2_025860_yapd	blue	492.424	PREDICTED: uncharacterized protein LOC104905146 [Beta vulgaris subsp. vulgaris]	GO:0003674(molecular_function);GO:0005739(mitochondrion);GO:0008150(biological_process);GO:0016020(membrane)	00564(Glycerophospholipid metabolism);00565(Ether lipid metabolism);00440(Phosphonate and phosphinate metabolism)	K00993	EC:2.7.8.1	16.0072	15.7678	15.8594	15.1779	14.37	15.6229	22.3323	23.872	25.5681	16.5839	15.0021	18.5489	44.3022	43.9168	45.6776	5.3253e-138	4.48398e-137
Bv5_124460_qmpf	blue	492.401	PREDICTED: protein transport protein Sec61 subunit gamma [Beta vulgaris subsp. vulgaris]	GO:0005622(intracellular);GO:0005623(cell);GO:0006605(protein targeting);GO:0006886(intracellular protein transport)	03060(Protein export);04141(Protein processing in endoplasmic reticulum);04145(Phagosome)	K07342	NA	24.4965	22.8612	24.6226	25.6072	26.0141	22.405	15.79	14.9374	14.7212	20.3032	18.3101	20.2743	10.1738	10.3338	9.3137	2.45017e-47	8.05644e-47
Bv6_128730_mweu	blue	492.392	PREDICTED: protein AE7-like 1 [Beta vulgaris subsp. vulgaris]	GO:0005634(nucleus);GO:0005737(cytoplasm);GO:0007059(chromosome segregation);GO:0016226(iron-sulfur cluster assembly)	NA	NA	NA	4.95106	4.73934	4.03784	15.256	13.9718	15.6223	21.2166	19.7967	20.5894	14.0965	13.3123	13.2845	23.4598	22.7117	23.5491	1.63721e-218	2.28308e-217
Bv6_153060_mqdn	blue	492.375	PREDICTED: ATP-dependent 6-phosphofructokinase 2 [Beta vulgaris subsp. vulgaris]	GO:0003872(6-phosphofructokinase activity);GO:0005524(ATP binding);GO:0005737(cytoplasm);GO:0005829(cytosol);GO:0005945(6-phosphofructokinase complex);GO:0006002(fructose 6-phosphate metabolic process);GO:0006096(glycolytic process);GO:0046872(metal ion binding)	00010(Glycolysis / Gluconeogenesis);00030(Pentose phosphate pathway);00051(Fructose and mannose metabolism);00052(Galactose metabolism);03018(RNA degradation)	K00850	EC:2.7.1.11	0.0001	0.0379311	0.0417087	0.803331	0.962823	0.758525	1.04766	1.66365	1.40066	0.18186	0.401228	0.185249	4.20236	5.1433	4.81503	8.71011e-78	4.32973e-77
Bv6_140590_rqdw	blue	491.651	PREDICTED: S-adenosylmethionine decarboxylase proenzyme-like [Beta vulgaris subsp. vulgaris]	GO:0004014(adenosylmethionine decarboxylase activity);GO:0005829(cytosol);GO:0006597(spermine biosynthetic process);GO:0008295(spermidine biosynthetic process)	00270(Cysteine and methionine metabolism);00330(Arginine and proline metabolism)	K01611	EC:4.1.1.50	1957.76	1816.55	1873.79	1029.49	1027.1	1022.67	1198.09	1246.28	1207.85	1058.91	1098.88	1094.51	592.501	622.287	598.269	2.12244e-99	1.3104e-98
Bv7_178250_jhcf	blue	491.533	PREDICTED: UPF0481 protein At3g47200 [Beta vulgaris subsp. vulgaris]	GO:0003674(molecular_function);GO:0005886(plasma membrane);GO:0008150(biological_process);GO:0016021(integral component of membrane)	NA	NA	NA	11.6035	12.6653	15.3616	10.18	8.66703	10.1271	17.986	16.2415	18.6089	19.1356	20.7984	20.5863	31.4066	29.9008	29.9329	1.39215e-50	4.82057e-50
Bv4_076130_kert	blue	491.531	hypothetical protein BVRB_4g076130 [Beta vulgaris subsp. vulgaris]	NA	NA	NA	NA	3.54644	3.63427	2.66823	3.39676	2.17162	2.80115	4.64849	4.44626	3.65274	9.86947	6.32566	6.73525	31.4483	26.2978	27.1204	3.18873e-88	1.76029e-87
Bv6_138290_rium	blue	491.439	PREDICTED: BTB/POZ domain-containing protein At5g66560 [Beta vulgaris subsp. vulgaris]	GO:0005886(plasma membrane);GO:0009416(response to light stimulus);GO:0016567(protein ubiquitination)	03050(Proteasome)	K03063	NA	27.2941	27.4106	29.1814	20.0607	18.2633	18.3588	34.2116	33.0077	36.6328	38.6783	39.2451	39.483	64.5164	63.2904	65.533	5.69121e-168	5.89915e-167
Bv6_146710_tkdd	blue	491.131	PREDICTED: 4-diphosphocytidyl-2-C-methyl-D-erythritol kinase, chloroplastic [Beta vulgaris subsp. vulgaris]	GO:0005524(ATP binding);GO:0009507(chloroplast);GO:0009570(chloroplast stroma);GO:0016114(terpenoid biosynthetic process);GO:0016310(phosphorylation);GO:0019288(isopentenyl diphosphate biosynthetic process, methylerythritol 4-phosphate pathway);GO:0050515(4-(cytidine 5'-diphospho)-2-C-methyl-D-erythritol kinase activity)	00900(Terpenoid backbone biosynthesis)	K00919	EC:2.7.1.148	9.20773	11.1306	11.7184	16.0959	14.3976	15.6301	19.2715	17.0026	19.623	12.7876	15.2113	14.7667	23.2702	24.514	21.6257	5.08951e-23	1.0363e-22
Bv3_058900_wddx	blue	491.036	PREDICTED: high mobility group B protein 10 [Beta vulgaris subsp. vulgaris]	GO:0003677(DNA binding);GO:0003682(chromatin binding);GO:0003700(DNA binding transcription factor activity);GO:0005515(protein binding);GO:0005634(nucleus);GO:0006338(chromatin remodeling);GO:0006351(transcription, DNA-templated);GO:0006355(regulation of transcription, DNA-templated)	NA	NA	NA	3.20232	2.89018	2.93183	4.02051	4.14405	4.1147	3.71711	4.23693	3.24423	6.14207	6.25571	5.7333	8.02708	8.73876	7.87744	1.27569e-39	3.67282e-39
Bv2_028550_emga	blue	490.922	PREDICTED: uncharacterized protein LOC104907320 [Beta vulgaris subsp. vulgaris]	GO:0000209(protein polyubiquitination);GO:0043161(proteasome-mediated ubiquitin-dependent protein catabolic process);GO:0061630(ubiquitin protein ligase activity)	NA	NA	NA	27.8938	28.4824	31.4785	52.4685	49.7203	49.3866	46.2487	51.1094	51.4334	38.4217	35.8181	37.5529	73.0308	72.2505	71.378	7.94323e-93	4.58918e-92
Bv2_030870_zoaq	blue	490.465	PREDICTED: calcium uptake protein 1 homolog, mitochondrial [Beta vulgaris subsp. vulgaris]	GO:0005509(calcium ion binding);GO:0005623(cell);GO:0005739(mitochondrion);GO:0005743(mitochondrial inner membrane);GO:0005758(mitochondrial intermembrane space);GO:0006816(calcium ion transport);GO:0051562(negative regulation of mitochondrial calcium ion concentration)	NA	NA	NA	20.4452	21.4536	20.2532	53.6445	51.5176	54.7545	110.587	103.739	103.974	53.532	54.5547	52.3371	119.244	117.258	120.861	0	0
Bv5_108130_dhpc	blue	490.351	hypothetical protein BVRB_5g108130 [Beta vulgaris subsp. vulgaris]	NA	NA	NA	NA	2.40497	2.16297	1.93997	22.8502	20.3121	26.7523	7.64109	8.50758	9.69704	50.2014	42.8371	48.0292	92.7184	85.7837	93.9449	0	0
Bv7_159690_wwaz	blue	490.331	PREDICTED: pentatricopeptide repeat-containing protein At1g77360, mitochondrial [Beta vulgaris subsp. vulgaris]	GO:0003723(RNA binding);GO:0005739(mitochondrion);GO:0008150(biological_process)	NA	NA	NA	20.5706	18.4897	23.2914	32.7751	36.5792	33.4065	25.9867	27.7671	28.5048	36.8695	32.9376	37.5067	48.1346	52.5284	51.7669	5.82169e-33	1.48249e-32
Bv1_012310_qonh	blue	490.311	PREDICTED: probable LRR receptor-like serine/threonine-protein kinase At1g34110 [Beta vulgaris subsp. vulgaris]	GO:0004674(protein serine/threonine kinase activity);GO:0005515(protein binding);GO:0005524(ATP binding);GO:0005886(plasma membrane);GO:0006468(protein phosphorylation);GO:0007169(transmembrane receptor protein tyrosine kinase signaling pathway);GO:0010082(regulation of root meristem growth);GO:0010449(root meristem growth);GO:0016021(integral component of membrane);GO:0016032(viral process)	NA	NA	NA	5.23198	5.71279	5.44977	4.15003	3.28689	4.62407	6.62781	6.70662	6.49131	9.68389	10.4518	10.8217	16.0224	17.8304	16.4546	1.15528e-97	7.0141e-97
Bv1_007090_skmg	blue	490.013	PREDICTED: uncharacterized protein LOC104889602 [Beta vulgaris subsp. vulgaris]	GO:0005634(nucleus);GO:0008168(methyltransferase activity);GO:0016021(integral component of membrane);GO:0032259(methylation)	NA	NA	NA	0.706499	0.555928	0.99124	0.635937	0.611027	0.628092	2.80708	3.16682	3.54988	1.47278	1.54881	1.39509	4.94104	5.10208	4.56007	3.90967e-104	2.51446e-103
Bv_016880_kiiq	blue	490.013	hypothetical protein BVRB_016880, partial [Beta vulgaris subsp. vulgaris]	GO:0051213(dioxygenase activity)	00402(Benzoxazinoid biosynthesis)	K13229	EC:1.14.11.59	6.24989	5.25385	5.92716	7.178	7.03231	6.53935	6.67806	5.46681	5.50102	10.8106	10.414	8.83333	27.4492	26.9835	25.0213	1.27439e-165	1.29896e-164
Bv6_151290_srhh	blue	489.054	PREDICTED: probable pre-mRNA-splicing factor ATP-dependent RNA helicase DEAH4 [Beta vulgaris subsp. vulgaris]	GO:0004004(ATP-dependent RNA helicase activity);GO:0004386(helicase activity);GO:0005524(ATP binding);GO:0005634(nucleus);GO:0005681(spliceosomal complex);GO:0006397(mRNA processing);GO:0008380(RNA splicing)	03040(Spliceosome)	K12818	EC:3.6.4.13	14.8825	13.9395	16.6668	12.784	9.15263	12.0202	26.5574	27.4044	30.2671	22.7484	25.6473	23.9171	38.4274	38.1056	38.3551	1.35405e-69	6.1642e-69
Bv2_026720_smox	blue	489.036	PREDICTED: IST1 homolog [Beta vulgaris subsp. vulgaris]	GO:0003674(molecular_function);GO:0005634(nucleus)	04144(Endocytosis)	K19476	NA	0.856448	0.601961	0.605765	3.25892	2.6436	3.03739	4.70758	3.1243	3.90363	1.76471	1.61563	1.53001	8.54256	6.83836	6.98549	2.22104e-83	1.16735e-82
Bv8_197990_guap	blue	489.034	PREDICTED: pentatricopeptide repeat-containing protein At1g80550, mitochondrial [Beta vulgaris subsp. vulgaris]	GO:0005739(mitochondrion);GO:0008150(biological_process)	NA	NA	NA	12.5919	11.2418	12.8242	9.48213	10.8005	10.6331	17.6169	21.5812	17.3418	21.6159	16.9486	20.6705	28.5046	30.7816	26.7299	2.7172e-30	6.54522e-30
Bv6_147690_mghj	blue	488.8	PREDICTED: two-component response regulator ARR11 isoform X1 [Beta vulgaris subsp. vulgaris]	GO:0000156(phosphorelay response regulator activity);GO:0000160(phosphorelay signal transduction system);GO:0003677(DNA binding);GO:0003700(DNA binding transcription factor activity);GO:0005515(protein binding);GO:0005634(nucleus);GO:0006351(transcription, DNA-templated);GO:0006355(regulation of transcription, DNA-templated);GO:0009735(response to cytokinin);GO:0009736(cytokinin-activated signali…	04075(Plant hormone signal transduction)	K14491	NA	5.74889	5.10106	5.07769	6.02215	6.4515	5.83241	8.05574	7.81253	7.789	5.24994	5.71594	5.41754	12.9087	12.3515	12.1518	4.96659e-70	2.27135e-69
Bv9_206110_oaka	blue	488.566	PREDICTED: ribulose-1,5 bisphosphate carboxylase/oxygenase large subunit N-methyltransferase, chloroplastic isoform X1 [Beta vulgaris subsp. vulgaris]	GO:0016279(protein-lysine N-methyltransferase activity);GO:0018026(peptidyl-lysine monomethylation)	00310(Lysine degradation)	K19199	EC:2.1.1.43	13.8501	13.506	13.4223	21.8548	20.5813	24.631	18.7255	20.9965	20.8533	26.0472	18.7111	19.1748	32.0988	38.5449	35.1984	9.86763e-26	2.14768e-25
Bv_011950_rigg	blue	488.512	hypothetical protein BVRB_011950 [Beta vulgaris subsp. vulgaris]	GO:0005680(anaphase-promoting complex);GO:0031625(ubiquitin protein ligase binding);GO:0061630(ubiquitin protein ligase activity)	04120(Ubiquitin mediated proteolysis)	K03349	NA	0.562513	0.423875	0.692684	1.3031	1.41242	1.36921	2.25142	1.64905	1.72662	2.25634	2.39262	2.21929	3.4215	2.53185	2.65635	1.3502e-15	2.23783e-15
Bv4_088400_qcmr	blue	488.322	hypothetical protein BVRB_4g088400 [Beta vulgaris subsp. vulgaris]	NA	NA	NA	NA	1.75123	1.91673	1.85362	2.1032	1.75021	1.48985	1.61348	1.14008	1.62926	1.38201	1.02798	1.24188	0.181784	0.32992	0.36329	1.45672e-20	2.77581e-20
Bv5_103380_qdpw	blue	488.282	PREDICTED: uncharacterized protein LOC104892561 [Beta vulgaris subsp. vulgaris]	GO:0003674(molecular_function);GO:0005634(nucleus);GO:0008150(biological_process)	NA	NA	NA	34.8472	34.4514	40.3637	61.2491	66.3153	64.3472	52.1186	60.4163	62.8776	62.4334	51.0619	55.0195	82.3684	87.4803	81.4588	3.13079e-40	9.12319e-40
Bv9_222850_ycjc	blue	488.257	PREDICTED: codeine O-demethylase [Beta vulgaris subsp. vulgaris]	GO:0051213(dioxygenase activity)	00941(Flavonoid biosynthesis)	K05278	EC:1.14.20.6	9.22521	8.40378	9.04924	12.2	12.5742	12.202	28.2944	27.2608	29.9976	21.5219	22.4557	22.3322	30.7159	31.2875	28.5684	1.04447e-90	5.90851e-90
Bv6_135090_hdwo	blue	488.122	PREDICTED: uncharacterized protein LOC104895674 [Beta vulgaris subsp. vulgaris]	GO:0003674(molecular_function);GO:0005634(nucleus);GO:0008150(biological_process);GO:0016021(integral component of membrane)	NA	NA	NA	2.61959	3.41504	3.00544	7.52154	8.43866	7.26966	6.75494	6.19561	4.93872	8.54322	9.11535	9.46225	11.9054	13.2074	14.0385	4.57105e-60	1.84074e-59
Bv1_001030_strk	blue	487.828	PREDICTED: NAC domain-containing protein 30 [Beta vulgaris subsp. vulgaris]	GO:0003700(DNA binding transcription factor activity);GO:0005515(protein binding);GO:0005634(nucleus);GO:0006351(transcription, DNA-templated);GO:0006355(regulation of transcription, DNA-templated);GO:0007275(multicellular organism development);GO:0009620(response to fungus);GO:0009733(response to auxin);GO:0009735(response to cytokinin);GO:0009737(response to abscisic acid);GO:0009741(response t…	03013(RNA transport);03015(mRNA surveillance pathway);03018(RNA degradation)	K13126	NA	0.201853	0.182434	0.132285	0.182172	0.280203	0.191676	0.740895	0.472948	0.953091	0.812669	0.765557	0.569928	1.03655	1.27992	1.19079	3.40595e-17	5.91468e-17
Bv1_000770_asqi	blue	487.443	hypothetical protein BVRB_1g000770 [Beta vulgaris subsp. vulgaris]	NA	NA	NA	NA	0.208243	0.198304	0.24041	0.540842	0.7753	0.777488	1.32399	1.2393	1.28954	0.984343	0.946389	0.828321	1.25926	1.9421	1.66586	2.59785e-27	5.86541e-27
Bv4_080940_nqap	blue	487.034	PREDICTED: uncharacterized protein LOC104890795 [Beta vulgaris subsp. vulgaris]	GO:0003674(molecular_function);GO:0005634(nucleus);GO:0008150(biological_process)	NA	NA	NA	4.83738	4.39341	4.86763	4.46823	2.62017	4.44224	3.00129	3.10806	2.02759	3.68271	2.30426	2.94708	0.523179	0.553337	0.397597	2.7841e-17	4.85121e-17
Bv6_153740_tcnp	blue	486.66	hypothetical protein BVRB_6g153740 [Beta vulgaris subsp. vulgaris]	NA	NA	NA	NA	67.5984	68.2546	76.4554	71.7004	73.699	71.8572	210.028	238.496	231.573	116.349	111.742	109.113	308.656	300.83	327.403	0	0
Bv2_044530_gwys	blue	486.615	PREDICTED: uncharacterized protein LOC104905948 [Beta vulgaris subsp. vulgaris]	GO:0003674(molecular_function);GO:0008150(biological_process);GO:0009507(chloroplast)	NA	NA	NA	40.8624	39.3845	38.4594	79.4941	86.2043	88.1728	67.8601	75.488	70.6492	49.8196	51.8085	54.6919	260.605	267.528	257.74	0	0
Bv2_039530_rzfa	blue	486.139	PREDICTED: protein C2-DOMAIN ABA-RELATED 1 [Beta vulgaris subsp. vulgaris]	GO:0005096(GTPase activator activity);GO:0005515(protein binding);GO:0005543(phospholipid binding);GO:0005634(nucleus);GO:0005829(cytosol);GO:0005886(plasma membrane);GO:0006952(defense response);GO:0009651(response to salt stress);GO:0009738(abscisic acid-activated signaling pathway);GO:0009789(positive regulation of abscisic acid-activated signaling pathway);GO:0046872(metal ion binding);GO:190…	NA	NA	NA	46.9369	49.2755	47.2239	33.2954	34.0476	35.3708	25.2178	27.8582	28.934	15.1821	15.3239	14.3241	10.6791	9.62405	11.3179	2.20688e-183	2.51558e-182
Bv6_151830_ktqt	blue	485.996	PREDICTED: uncharacterized protein LOC104897665 [Beta vulgaris subsp. vulgaris]	GO:0003674(molecular_function);GO:0005634(nucleus);GO:0008150(biological_process)	NA	NA	NA	15.2602	18.7883	16.2542	30.7139	33.9695	32.5755	28.9908	33.4685	28.279	25.1394	31.23	23.3162	44.1887	44.7533	46.3205	4.54697e-34	1.18247e-33
Bv4_097210_jqfr	blue	485.925	hypothetical protein BVRB_4g097210 [Beta vulgaris subsp. vulgaris]	GO:0004842(ubiquitin-protein transferase activity);GO:0005576(extracellular region);GO:0005886(plasma membrane);GO:0008270(zinc ion binding);GO:0009814(defense response, incompatible interaction);GO:0009816(defense response to bacterium, incompatible interaction);GO:0010200(response to chitin);GO:0016021(integral component of membrane);GO:0016567(protein ubiquitination);GO:0043161(proteasome-medi…	NA	NA	NA	89.883	88.0644	86.3385	55.6185	53.4768	56.9455	65.9723	66.8343	67.4456	71.2431	64.4087	69.3045	38.0933	36.4651	37.7039	1.3482e-95	8.03627e-95
Bv8_200790_zriw	blue	485.879	PREDICTED: probable phytol kinase 1, chloroplastic isoform X1 [Beta vulgaris subsp. vulgaris]	GO:0004605(phosphatidate cytidylyltransferase activity);GO:0008654(phospholipid biosynthetic process);GO:0009507(chloroplast);GO:0010189(vitamin E biosynthetic process);GO:0010276(phytol kinase activity);GO:0016020(membrane);GO:0016021(integral component of membrane);GO:0016301(kinase activity);GO:0016310(phosphorylation);GO:0031969(chloroplast membrane)	NA	NA	NA	3.99808	4.14794	5.14815	8.90123	9.43115	9.75941	9.96443	10.4527	9.21132	12.9217	10.3225	11.4749	12.7965	15.0142	14.8464	9.99471e-26	2.17459e-25
Bv4_077910_asca	blue	485.874	hypothetical protein BVRB_4g077910 [Beta vulgaris subsp. vulgaris]	GO:0005634(nucleus)	NA	NA	NA	6.5516	5.57437	6.24247	6.87584	5.92061	6.66059	7.62451	5.93014	9.3098	8.92923	7.35473	7.53357	12.6163	13.3325	13.8808	2.94083e-11	4.25964e-11
Bv3_051890_ajdr	blue	485.658	PREDICTED: uncharacterized protein LOC104888238 isoform X1 [Beta vulgaris subsp. vulgaris];PREDICTED: uncharacterized protein LOC104888238 isoform X2 [Beta vulgaris subsp. vulgaris]	GO:0000976(transcription regulatory region sequence-specific DNA binding);GO:0003700(DNA binding transcription factor activity);GO:0005634(nucleus);GO:0032454(histone demethylase activity (H3-K9 specific));GO:0033169(histone H3-K9 demethylation);GO:0042742(defense response to bacterium);GO:2000028(regulation of photoperiodism, flowering);GO:2000028(regulation of photoperiodism, flowering)	NA	NA	NA	2.34693	2.76864	1.90456	1.07671	1.86506	1.60332	7.2335	8.0856	8.62958	6.5749	6.44777	4.90465	10.2531	11.2971	11.0703	5.39437e-63	2.25854e-62
Bv7_166430_zjey	blue	485.398	PREDICTED: protein LYK2 [Beta vulgaris subsp. vulgaris]	GO:0004675(transmembrane receptor protein serine/threonine kinase activity);GO:0005524(ATP binding);GO:0005886(plasma membrane);GO:0006468(protein phosphorylation);GO:0007166(cell surface receptor signaling pathway);GO:0009507(chloroplast);GO:0016021(integral component of membrane);GO:0016301(kinase activity);GO:0016310(phosphorylation)	NA	NA	NA	0.18622	0.186909	0.205519	0.712585	0.230169	0.308853	0.829805	0.97399	0.850517	0.721653	0.853444	1.88178	2.81078	3.31225	2.35251	4.77513e-12	7.09465e-12
Bv6_135660_ocpz	blue	484.855	PREDICTED: transcription factor TGA4 isoform X1 [Beta vulgaris subsp. vulgaris]	GO:0000977(RNA polymerase II regulatory region sequence-specific DNA binding);GO:0003677(DNA binding);GO:0003700(DNA binding transcription factor activity);GO:0005515(protein binding);GO:0005516(calmodulin binding);GO:0005634(nucleus);GO:0006351(transcription, DNA-templated);GO:0006355(regulation of transcription, DNA-templated);GO:0009409(response to cold);GO:0042742(defense response to bacteriu…	04075(Plant hormone signal transduction)	K14431	NA	69.3369	65.4856	66.6536	138.344	149.68	136.75	201.774	179.18	171.202	123.501	126.55	124.783	204.215	210.201	224.667	1.6703e-129	1.32417e-128
Bv4_091670_dyhj	blue	484.34	PREDICTED: uncharacterized protein At4g26485 [Beta vulgaris subsp. vulgaris]	GO:0004826(phenylalanine-tRNA ligase activity);GO:0005737(cytoplasm);GO:0006432(phenylalanyl-tRNA aminoacylation)	NA	NA	NA	4.09761	4.16292	3.93848	5.18307	5.39311	4.83674	10.8005	11.9856	11.9057	8.15773	9.9575	8.9061	15.2385	11.9643	12.758	4.5788e-50	1.57458e-49
Bv1_000190_ckiq	blue	484.071	PREDICTED: flavonol synthase/flavanone 3-hydroxylase [Beta vulgaris subsp. vulgaris]	GO:0045431(flavonol synthase activity)	00941(Flavonoid biosynthesis)	K05278	EC:1.14.20.6	3.12739	3.02645	3.57909	6.50315	5.90095	5.6319	7.30631	6.98251	7.77085	5.22498	4.28794	5.38988	8.658	9.71141	9.28517	6.64026e-31	1.62112e-30
Bv_012850_dfio	blue	484.005	PREDICTED: uncharacterized protein LOC104884875 [Beta vulgaris subsp. vulgaris]	NA	NA	NA	NA	19.1464	20.4658	19.1015	0.0001	0.0928207	0.0001	23.0408	21.2921	21.4665	75.0296	83.3889	89.1009	199.845	192.699	209.745	0	0
Bv6_153770_wfqg	blue	483.646	PREDICTED: E3 ubiquitin-protein ligase RNF181 [Beta vulgaris subsp. vulgaris]	GO:0000209(protein polyubiquitination);GO:0043161(proteasome-mediated ubiquitin-dependent protein catabolic process);GO:0061630(ubiquitin protein ligase activity)	NA	NA	NA	10.8517	10.5623	12.371	20.372	17.8704	19.2633	18.7772	20.6236	24.2723	14.0811	13.8835	13.3244	83.3008	72.3837	83.5893	1.47365e-290	2.91035e-289
Bv6_133560_aski	blue	483.41	PREDICTED: UDP-galactose transporter 2 [Beta vulgaris subsp. vulgaris]	GO:0000139(Golgi membrane);GO:0005338(nucleotide-sugar transmembrane transporter activity);GO:0005459(UDP-galactose transmembrane transporter activity);GO:0005794(Golgi apparatus);GO:0005886(plasma membrane);GO:0008643(carbohydrate transport);GO:0015297(antiporter activity);GO:0015780(nucleotide-sugar transmembrane transport);GO:0016021(integral component of membrane);GO:0022857(transmembrane tra…	NA	NA	NA	85.8047	84.9348	85.3673	67.0551	61.5693	66.6734	48.77	43.5597	45.5063	71.4128	64.2621	60.6446	41.6084	36.732	38.4963	3.95371e-64	1.67944e-63
Bv_000870_tyut	blue	482.933	PREDICTED: probable LRR receptor-like serine/threonine-protein kinase At1g67720 [Beta vulgaris subsp. vulgaris]	GO:0005886(plasma membrane);GO:0007165(signal transduction)	NA	NA	NA	79.3701	74.7635	82.773	37.0777	37.5708	38.6329	45.1007	44.4395	45.0046	40.8987	42.8868	38.9062	17.9017	18.5939	19.4875	2.19555e-226	3.22518e-225
Bv6_155250_wfwx	blue	482.741	PREDICTED: microtubule-associated protein TORTIFOLIA1 [Beta vulgaris subsp. vulgaris]	GO:0005737(cytoplasm);GO:0008150(biological_process)	NA	NA	NA	11.6643	12.4884	11.5047	13.7707	13.9562	13.4552	18.2959	17.7438	20.8374	26.56	31.5488	31.2934	35.8887	38.934	35.7477	1.7712e-88	9.81188e-88
Bv4_091380_izse	blue	482.711	PREDICTED: uncharacterized protein LOC104907026 [Beta vulgaris subsp. vulgaris]	NA	NA	NA	NA	1.33534	0.785588	1.17554	1.70882	1.91391	1.59707	2.44865	2.12019	2.08682	5.6877	5.60765	6.0589	7.7842	8.34496	8.69951	9.24415e-78	4.59159e-77
Bv7_175280_nczs	blue	482.659	PREDICTED: gamma-interferon-inducible lysosomal thiol reductase [Beta vulgaris subsp. vulgaris]	GO:0003824(catalytic activity);GO:0005576(extracellular region);GO:0005773(vacuole);GO:0008150(biological_process)	NA	NA	NA	0.410374	0.204688	0.0001	0.121637	0.13431	0.0001	1.35429	1.08017	0.743227	7.32886	6.67003	4.34181	16.7018	12.3064	14.5323	5.97611e-81	3.07456e-80
Bv6_128680_pjam	blue	482.241	PREDICTED: scarecrow-like protein 4 [Beta vulgaris subsp. vulgaris]	GO:0003700(DNA binding transcription factor activity);GO:0005634(nucleus);GO:0006355(regulation of transcription, DNA-templated);GO:0043565(sequence-specific DNA binding)	04075(Plant hormone signal transduction)	K14494	NA	4.47406	4.35607	3.98825	4.47745	5.06003	4.49176	6.1379	6.56907	7.25001	8.12653	9.15181	9.6943	10.5918	10.1778	11.2372	9.26302e-51	3.21277e-50
Bv1_007290_jjmy	blue	482.239	PREDICTED: glycine-rich protein A3 [Beta vulgaris subsp. vulgaris]	NA	NA	NA	NA	26.4479	25.4354	23.3593	44.7616	39.7956	41.5577	49.7555	40.6255	41.3313	67.6066	62.5476	65.7491	77.1825	73.0965	76.0001	9.1298e-100	5.66812e-99
Bv5_115600_hpod	blue	482.208	PREDICTED: AAA-ATPase At3g28580 [Beta vulgaris subsp. vulgaris]	GO:0000304(response to singlet oxygen);GO:0005524(ATP binding);GO:0005783(endoplasmic reticulum);GO:0005886(plasma membrane);GO:0009737(response to abscisic acid);GO:0016021(integral component of membrane);GO:0016787(hydrolase activity);GO:0016887(ATPase activity)	NA	NA	NA	0.0001	0.0001	0.106058	5.58064	5.57837	4.77558	3.41536	3.24714	3.11503	1.15387	1.7705	1.63249	15.3029	14.7207	14.2011	7.76545e-235	1.18664e-233
Bv2_046270_egph	blue	482.148	PREDICTED: probable BOI-related E3 ubiquitin-protein ligase 3 [Beta vulgaris subsp. vulgaris]	GO:0005634(nucleus);GO:0005737(cytoplasm);GO:0006952(defense response);GO:0016740(transferase activity);GO:0043067(regulation of programmed cell death);GO:0043161(proteasome-mediated ubiquitin-dependent protein catabolic process);GO:0046872(metal ion binding)	NA	NA	NA	1.54457	1.89494	1.75881	2.48351	2.01076	2.17906	2.59945	2.90886	3.40365	3.2342	3.26033	3.22361	3.48258	4.13359	4.52388	2.99704e-13	4.62484e-13
Bv1_012190_rzko	blue	481.747	PREDICTED: protein GIGANTEA [Beta vulgaris subsp. vulgaris]	GO:0005515(protein binding);GO:0005634(nucleus);GO:0005654(nucleoplasm);GO:0005737(cytoplasm);GO:0006355(regulation of transcription, DNA-templated);GO:0007623(circadian rhythm);GO:0009409(response to cold);GO:0009585(red, far-red light phototransduction);GO:0009637(response to blue light);GO:0009908(flower development);GO:0010218(response to far red light);GO:0010378(temperature compensation of …	04712(Circadian rhythm - plant)	K12124	NA	42.0971	40.0436	40.6586	50.139	49.3306	53.7069	99.6268	91.6451	87.1203	57.7737	64.7341	65.5747	105.773	99.0888	100.893	1.55406e-123	1.17134e-122
Bv6_143640_dpxq	blue	481.588	hypothetical protein BVRB_6g143640 [Beta vulgaris subsp. vulgaris]	NA	NA	NA	NA	0.0710782	0.194893	0.118768	0.587918	1.15246	0.614972	1.11158	0.421139	0.829731	1.12834	0.812295	0.769616	1.95054	1.82642	1.66795	1.15157e-11	1.69122e-11
Bv5_110250_wgni	blue	481.501	hypothetical protein BVRB_5g110250 isoform A [Beta vulgaris subsp. vulgaris];hypothetical protein BVRB_5g110250 isoform B [Beta vulgaris subsp. vulgaris]	NA	03018(RNA degradation);03018(RNA degradation)	K14442	EC:3.6.4.13	1.69707	1.56607	1.76104	2.38054	2.12662	2.20709	2.53482	1.94177	2.65283	2.14469	2.27917	2.59312	3.8909	4.38252	3.34976	1.97113e-15	3.24825e-15
Bv6_148240_ajye	blue	481.391	PREDICTED: WAT1-related protein At4g08300 [Beta vulgaris subsp. vulgaris]	GO:0005886(plasma membrane);GO:0015171(amino acid transmembrane transporter activity);GO:0032973(amino acid export across plasma membrane);GO:0043090(amino acid import);GO:0080144(amino acid homeostasis)	NA	NA	NA	87.0905	86.9778	80.0121	168.216	181.472	172.147	198.001	187.961	180.813	92.3331	94.334	94.6459	425.221	422.53	419.39	0	0
Bv5_119250_asyc	blue	481.365	PREDICTED: membrane-bound transcription factor site-2 protease homolog [Beta vulgaris subsp. vulgaris]	GO:0005739(mitochondrion);GO:0006508(proteolysis);GO:0009651(response to salt stress);GO:0031293(membrane protein intracellular domain proteolysis);GO:1900457(regulation of brassinosteroid mediated signaling pathway);GO:1905897(regulation of response to endoplasmic reticulum stress)	04141(Protein processing in endoplasmic reticulum)	K07765	EC:3.4.24.85	2.0921	1.95119	1.50198	4.24198	2.77774	3.20827	4.84179	3.75121	4.19355	2.70738	3.51527	3.58424	6.09838	5.62149	5.58436	1.15729e-13	1.80849e-13
Bv_034060_pcuc	blue	480.9	PREDICTED: LOW QUALITY PROTEIN: transcriptional repressor ILP1-like [Beta vulgaris subsp. vulgaris]	GO:0000978(RNA polymerase II proximal promoter sequence-specific DNA binding);GO:0005634(nucleus)	NA	NA	NA	1.22275	1.35722	1.18169	2.30549	1.83429	1.81369	2.72114	2.09061	1.92833	2.36629	2.00289	2.15575	3.46428	2.89932	2.99779	5.11468e-12	7.59321e-12
Bv1_000580_zjoi	blue	480.885	PREDICTED: probable arabinosyltransferase ARAD1 [Beta vulgaris subsp. vulgaris]	GO:0003824(catalytic activity);GO:0005794(Golgi apparatus);GO:0006486(protein glycosylation);GO:0016020(membrane);GO:0016021(integral component of membrane);GO:0016757(transferase activity, transferring glycosyl groups)	00510(N-Glycan biosynthesis);04141(Protein processing in endoplasmic reticulum)	K01228	EC:3.2.1.106	6.4285	5.81085	3.41114	6.0635	7.96538	5.92394	7.26651	7.84295	11.3939	8.51072	11.6377	10.1398	14.7057	17.0708	18.4236	2.86945e-14	4.56682e-14
Bv6_152310_guae	blue	480.814	PREDICTED: uncharacterized protein LOC104897758 [Beta vulgaris subsp. vulgaris]	GO:0003674(molecular_function);GO:0008150(biological_process);GO:0009507(chloroplast)	NA	NA	NA	4.72098	5.0218	5.18357	15.9567	18.0407	15.2424	23.0403	20.0733	22.1916	25.6411	23.5509	23.7319	30.2823	28.1315	26.2034	6.0192e-185	6.92354e-184
Bv4_071520_ztpt	blue	480.721	PREDICTED: protein EMBRYO SAC DEVELOPMENT ARREST 3, chloroplastic [Beta vulgaris subsp. vulgaris]	GO:0009507(chloroplast);GO:0009534(chloroplast thylakoid);GO:0009535(chloroplast thylakoid membrane);GO:0009543(chloroplast thylakoid lumen);GO:0009561(megagametogenesis);GO:0010027(thylakoid membrane organization);GO:0046872(metal ion binding);GO:0048564(photosystem I assembly)	03018(RNA degradation)	K12603	EC:3.1.13.4	2.56236	2.364	2.43747	2.28857	3.0539	2.23065	4.4316	4.1717	4.25141	3.09159	4.50043	3.85883	6.00524	5.71433	5.16472	2.76638e-12	4.14357e-12
Bv7_169760_mawi	blue	480.488	PREDICTED: uncharacterized protein LOC104899733 isoform X1 [Beta vulgaris subsp. vulgaris]	GO:0003674(molecular_function);GO:0005634(nucleus);GO:0009630(gravitropism);GO:0009958(positive gravitropism);GO:0009958(positive gravitropism)	NA	NA	NA	2.86812	3.3908	2.34571	3.80854	3.17414	1.97174	3.98924	3.01342	4.24544	4.57926	4.78983	4.26649	8.58359	8.3021	7.0986	2.47351e-08	3.25102e-08
Bv9_208010_isqd	blue	479.77	PREDICTED: ABC transporter A family member 7 [Beta vulgaris subsp. vulgaris]	GO:0006869(lipid transport);GO:0042626(ATPase activity, coupled to transmembrane movement of substances);GO:0043231(intracellular membrane-bounded organelle)	02010(ABC transporters)	K05643	NA	668.977	649.734	669.195	594.818	612.077	606.686	293.981	297.029	300.12	391.101	430.987	413.135	274.019	279.355	273.281	1.2185e-176	1.33367e-175
Bv3_052450_dyma	blue	479.748	PREDICTED: bidirectional sugar transporter SWEET3 [Beta vulgaris subsp. vulgaris]	GO:0008643(carbohydrate transport);GO:0016021(integral component of membrane);GO:0051119(sugar transmembrane transporter activity)	NA	NA	NA	0.176965	0.253425	0.569785	0.108708	0.0960264	0.06646	1.78564	1.81141	1.05417	4.1556	2.48085	3.04284	5.11494	5.99332	4.95574	4.91001e-61	2.0023e-60
Bv7_167970_qmek	blue	479.745	PREDICTED: RPM1-interacting protein 4 [Beta vulgaris subsp. vulgaris]	NA	04626(Plant-pathogen interaction)	K13456	NA	721.869	698.571	757.334	529.931	534.51	533.47	515.845	499.286	503.446	691.978	707.748	671.385	158.234	165.721	163.877	6.4168e-277	1.19396e-275
Bv8_197070_rddu	blue	479.709	PREDICTED: E3 ubiquitin-protein ligase ATL42 [Beta vulgaris subsp. vulgaris]	GO:0043161(proteasome-mediated ubiquitin-dependent protein catabolic process);GO:0061630(ubiquitin protein ligase activity)	NA	NA	NA	0.935678	1.32049	1.39648	5.51656	3.71195	4.11901	9.72453	9.24133	11.435	12.8895	13.4374	15.0741	16.6925	15.6157	14.8871	6.7639e-96	4.04576e-95
Bv6_131570_rzdr	blue	479.512	PREDICTED: proteinaceous RNase P 2-like [Beta vulgaris subsp. vulgaris]	GO:0001682(tRNA 5'-leader removal);GO:0004526(ribonuclease P activity);GO:0005215(transporter activity);GO:0005634(nucleus);GO:0005739(mitochondrion);GO:0006397(mRNA processing);GO:0016020(membrane);GO:0043144(snoRNA processing)	03013(RNA transport)	K18213	EC:3.1.26.5	0.769798	0.767777	0.658693	0.782588	0.857988	1.30446	1.41348	1.24727	1.67392	1.52548	1.01773	1.06633	2.24156	2.36577	1.97216	2.39266e-06	2.93898e-06
Bv6_144350_tscg	blue	479.088	PREDICTED: 21 kDa protein [Beta vulgaris subsp. vulgaris]	GO:0004857(enzyme inhibitor activity)	00040(Pentose and glucuronate interconversions)	K01051	EC:3.1.1.11	2.13854	2.18284	2.76376	2.10719	1.18309	1.75193	3.24225	3.80256	3.81678	7.55109	7.63361	6.7613	11.1386	10.5193	11.0209	1.45886e-91	8.30714e-91
Bv4_075600_xckp	blue	478.547	hypothetical protein BVRB_4g075600 isoform A [Beta vulgaris subsp. vulgaris];hypothetical protein BVRB_4g075600 isoform B [Beta vulgaris subsp. vulgaris]	GO:0004674(protein serine/threonine kinase activity);GO:0005886(plasma membrane);GO:0007166(cell surface receptor signaling pathway);GO:0007166(cell surface receptor signaling pathway)	NA	NA	NA	0.198744	0.539902	0.526672	0.417815	0.205141	0.603871	1.28658	1.10485	1.59406	0.941245	0.524267	0.897787	2.32509	2.21282	2.05459	1.73667e-13	2.69791e-13
Bv3_051120_oicz	blue	478.505	PREDICTED: probable 6-phosphogluconolactonase 4, chloroplastic [Beta vulgaris subsp. vulgaris]	GO:0002229(defense response to oomycetes);GO:0003824(catalytic activity);GO:0005515(protein binding);GO:0005777(peroxisome);GO:0005829(cytosol);GO:0005975(carbohydrate metabolic process);GO:0009051(pentose-phosphate shunt, oxidative branch);GO:0009507(chloroplast);GO:0009536(plastid);GO:0009570(chloroplast stroma);GO:0009793(embryo development ending in seed dormancy);GO:0017057(6-phosphogluconol…	00030(Pentose phosphate pathway)	K01057	EC:3.1.1.31	0.605297	0.304497	0.165586	0.804279	1.03467	1.3556	2.35337	2.16377	2.22485	1.18963	0.915151	1.02889	3.12693	2.52102	2.96456	6.55381e-20	1.22813e-19
Bv3_062970_usen	blue	478.343	PREDICTED: uncharacterized protein LOC104889492 isoform X1 [Beta vulgaris subsp. vulgaris]	GO:0003674(molecular_function);GO:0005739(mitochondrion);GO:0008150(biological_process);GO:0016021(integral component of membrane)	NA	NA	NA	2.22715	2.087	2.14062	2.9405	3.61634	2.85254	4.96727	4.05663	3.93254	2.65191	3.75376	3.10778	5.47418	7.09268	6.56332	8.30805e-24	1.72666e-23
Bv2_024820_kkcq	blue	477.949	PREDICTED: elicitor-responsive protein 1 isoform X2 [Beta vulgaris subsp. vulgaris];PREDICTED: elicitor-responsive protein 1 isoform X1 [Beta vulgaris subsp. vulgaris]	GO:0005509(calcium ion binding);GO:0005544(calcium-dependent phospholipid binding);GO:0005886(plasma membrane);GO:0005886(plasma membrane)	00010(Glycolysis / Gluconeogenesis);00051(Fructose and mannose metabolism);00562(Inositol phosphate metabolism);00710(Carbon fixation in photosynthetic organisms);00710(Carbon fixation in photosynthetic organisms)	K01803	EC:5.3.1.1	141.818	143.003	154.435	73.6986	77.1469	74.014	72.7503	89.0915	85.2033	93.7353	98.15	88.4278	41.7405	41.5244	45.0822	1.57918e-114	1.115e-113
Bv7_178270_zute	blue	477.674	PREDICTED: UPF0481 protein At3g47200-like [Beta vulgaris subsp. vulgaris]	GO:0003674(molecular_function);GO:0005886(plasma membrane);GO:0008150(biological_process);GO:0016021(integral component of membrane)	00052(Galactose metabolism);00500(Starch and sucrose metabolism)	K01193	EC:3.2.1.26	52.1286	51.9134	51.286	36.4372	34.4686	39.2024	34.0273	36.7106	35.2296	27.6369	31.6815	30.5993	25.2546	23.8632	24.3247	2.09297e-43	6.44322e-43
Bv7_160030_hzqt	blue	477.548	PREDICTED: 1,4-alpha-glucan-branching enzyme 2-2, chloroplastic/amyloplastic isoform X1 [Beta vulgaris subsp. vulgaris]	GO:0003844(1,4-alpha-glucan branching enzyme activity);GO:0009790(embryo development)	00500(Starch and sucrose metabolism)	K00700	EC:2.4.1.18	22.3033	22.5413	20.9651	34.2975	36.7821	37.7066	40.9396	38.7746	39.1128	42.141	46.2781	43.9068	49.0405	49.8213	47.9004	5.41886e-79	2.72653e-78
Bv7_172720_kyyx	blue	477.456	PREDICTED: UPF0503 protein At3g09070, chloroplastic [Beta vulgaris subsp. vulgaris]	GO:0003674(molecular_function);GO:0005886(plasma membrane);GO:0009507(chloroplast);GO:0010088(phloem development);GO:0016324(apical plasma membrane);GO:0016328(lateral plasma membrane)	NA	NA	NA	13.2909	11.6448	14.0828	13.2206	16.6557	18.1509	19.4697	19.9957	22.701	28.3388	29.5136	25.7623	32.6131	31.339	32.604	1.45235e-29	3.44682e-29
Bv9_218500_neoy	blue	477.062	PREDICTED: salicylic acid-binding protein 2 [Beta vulgaris subsp. vulgaris]	GO:0016787(hydrolase activity)	00460(Cyanoamino acid metabolism)	K20802	EC:4.1.2.10	1.66127	1.7877	0.779026	1.86089	1.72873	2.30616	2.48288	2.448	2.0395	3.23782	3.53611	3.38416	4.07653	4.58579	4.37185	1.27797e-06	1.58475e-06
Bv3_057310_zisf	blue	477.04	PREDICTED: LOW QUALITY PROTEIN: pleiotropic drug resistance protein 3-like [Beta vulgaris subsp. vulgaris]	GO:0005886(plasma membrane);GO:0016021(integral component of membrane);GO:0042626(ATPase activity, coupled to transmembrane movement of substances)	NA	NA	NA	3.58357	4.13384	3.32423	2.49568	2.03155	2.0375	6.6299	4.95896	5.46459	5.37778	5.14814	6.24161	11.0117	9.56545	10.5399	5.11106e-64	2.16815e-63
Bv6_144290_iasd	blue	476.753	PREDICTED: UPF0161 protein At3g09310 [Beta vulgaris subsp. vulgaris]	GO:0003674(molecular_function);GO:0005634(nucleus);GO:0008150(biological_process)	NA	NA	NA	1.16802	1.30876	0.931997	2.53947	2.03657	2.67757	2.398	2.46479	2.67588	1.82474	1.50631	1.52685	4.59703	4.49777	5.61977	3.43677e-50	1.18421e-49
Bv3_062470_fpkn	blue	476.511	PREDICTED: thioredoxin-like 3-3 [Beta vulgaris subsp. vulgaris]	GO:0000103(sulfate assimilation);GO:0005737(cytoplasm);GO:0006457(protein folding);GO:0015035(protein disulfide oxidoreductase activity);GO:0016671(oxidoreductase activity, acting on a sulfur group of donors, disulfide as acceptor);GO:0034599(cellular response to oxidative stress);GO:0045454(cell redox homeostasis);GO:0055114(oxidation-reduction process)	NA	NA	NA	2.00764	1.98935	1.88116	3.70509	2.65701	2.72281	2.93896	2.70494	3.69546	2.99609	3.13199	3.12654	5.1985	5.99611	4.59703	8.94741e-15	1.4446e-14
Bv4_093300_qxwj	blue	476.292	PREDICTED: uncharacterized protein LOC104907248 [Beta vulgaris subsp. vulgaris]	GO:0003674(molecular_function);GO:0005634(nucleus);GO:0009611(response to wounding)	NA	NA	NA	1.94262	3.03764	2.21041	5.94627	6.45986	6.58683	16.506	15.3738	17.0501	6.4433	5.22264	6.28011	22.519	24.0815	19.4823	1.30848e-75	6.36926e-75
Bv1_004170_dtzu	blue	475.948	hypothetical protein BVRB_1g004170 [Beta vulgaris subsp. vulgaris]	NA	NA	NA	NA	2.7172	2.38712	1.79456	15.755	16.0939	15.5281	11.1017	10.0926	9.30721	10.9831	12.1638	9.74716	25.5522	26.5365	21.4279	4.99807e-94	2.92592e-93
Bv2_026880_tzyr	blue	475.667	PREDICTED: cytokinin hydroxylase [Beta vulgaris subsp. vulgaris]	GO:0004497(monooxygenase activity)	00908(Zeatin biosynthesis)	K10717	NA	15.2859	14.397	13.2501	9.83856	10.5739	12.1387	13.6259	16.7873	18.2577	21.0239	19.3274	21.031	35.4344	32.1266	34.3077	1.96254e-52	7.02511e-52
Bv7_157940_frjp	blue	475.516	hypothetical protein BVRB_7g157940 [Beta vulgaris subsp. vulgaris]	GO:0000041(transition metal ion transport);GO:0005381(iron ion transmembrane transporter activity);GO:0006824(cobalt ion transport);GO:0006826(iron ion transport);GO:0009705(plant-type vacuole membrane);GO:0015087(cobalt ion transmembrane transporter activity);GO:0015099(nickel cation transmembrane transporter activity);GO:0015675(nickel cation transport);GO:0055068(cobalt ion homeostasis)	NA	NA	NA	1.10217	1.29697	1.76	3.60171	4.77105	3.07739	6.28966	6.68673	6.13373	7.01658	6.04999	6.96194	7.31705	8.61854	7.7705	1.57655e-30	3.81893e-30
Bv9_205960_kwca	blue	475.168	PREDICTED: uncharacterized protein LOC104902954 [Beta vulgaris subsp. vulgaris]	GO:0005515(protein binding);GO:0005634(nucleus);GO:0008150(biological_process)	NA	NA	NA	42.447	40.6214	39.1322	27.4673	26.324	27.7501	32.5542	31.7752	29.2357	26.9829	27.5809	25.3121	19.4685	16.9787	19.0161	5.6655e-39	1.61015e-38
Bv6_151280_hdke	blue	475.035	PREDICTED: ankyrin-3 [Beta vulgaris subsp. vulgaris]	GO:0005737(cytoplasm);GO:0008150(biological_process)	NA	NA	NA	21.1072	20.136	20.0918	23.9983	25.1514	26.7492	39.8571	35.6741	35.3103	24.7248	24.2478	21.9622	46.6229	46.6254	46.0784	5.4311e-82	2.81631e-81
Bv8_181930_xzjt	blue	474.817	0	NA	NA	NA	NA	1.40041	0.768866	0.477954	1.27134	0.706243	0.778454	1.84149	1.13996	1.54539	2.27535	1.46212	1.28554	11.5284	12.1045	10.3118	1.76649e-41	5.24668e-41
Bv7_177600_wgxg	blue	474.651	PREDICTED: B-box zinc finger protein 32 [Beta vulgaris subsp. vulgaris]	GO:0003700(DNA binding transcription factor activity);GO:0005515(protein binding);GO:0005634(nucleus);GO:0005737(cytoplasm);GO:0006351(transcription, DNA-templated);GO:0006355(regulation of transcription, DNA-templated);GO:0008270(zinc ion binding);GO:0009640(photomorphogenesis);GO:0009785(blue light signaling pathway);GO:0009909(regulation of flower development);GO:0010017(red or far-red light s…	NA	NA	NA	21.2986	21.6313	26.963	24.0941	22.1953	23.0293	61.0863	61.9892	64.8735	52.7727	47.5509	50.1839	68.3258	68.7687	74.4895	4.17289e-147	3.72694e-146
Bv1_015850_kant	blue	474.454	PREDICTED: transcription factor ALC isoform X1 [Beta vulgaris subsp. vulgaris]	GO:0003677(DNA binding);GO:0003700(DNA binding transcription factor activity);GO:0005515(protein binding);GO:0005634(nucleus);GO:0006351(transcription, DNA-templated);GO:0006355(regulation of transcription, DNA-templated);GO:0007623(circadian rhythm);GO:0009409(response to cold);GO:0009908(flower development);GO:0010114(response to red light);GO:0010154(fruit development);GO:0010187(negative regu…	NA	NA	NA	1.57526	1.82482	1.61962	3.07955	2.65953	3.13627	3.02332	2.94712	4.10854	2.85394	2.90021	3.89821	4.69152	4.46201	5.26853	2.0271e-10	2.85955e-10
Bv4_087650_insq	blue	473.972	PREDICTED: CBS domain-containing protein CBSX5 [Beta vulgaris subsp. vulgaris]	GO:0005576(extracellular region);GO:0008150(biological_process)	NA	NA	NA	61.746	59.0544	61.8658	42.5484	42.6513	42.6724	50.2138	47.7412	47.1115	35.8956	38.8231	36.0159	28.586	26.6966	26.0265	2.13282e-54	7.84623e-54
Bv7_164450_fttt	blue	473.504	PREDICTED: BTB/POZ domain-containing protein At1g03010 isoform X2 [Beta vulgaris subsp. vulgaris];PREDICTED: BTB/POZ domain-containing protein At1g03010 isoform X1 [Beta vulgaris subsp. vulgaris]	GO:0005886(plasma membrane);GO:0009416(response to light stimulus);GO:0009860(pollen tube growth);GO:0016567(protein ubiquitination);GO:0016567(protein ubiquitination)	03050(Proteasome);03050(Proteasome)	K03063	NA	10.4848	12.0079	11.2725	8.09101	9.23881	8.69067	18.2943	22.4034	24.2709	25.7775	23.6407	27.3668	32.7405	33.0485	39.358	6.63101e-54	2.42066e-53
Bv5_101150_qmjs	blue	473.328	PREDICTED: DNA-directed RNA polymerase IV subunit 1 [Beta vulgaris subsp. vulgaris]	GO:0001056(RNA polymerase III activity);GO:0005666(DNA-directed RNA polymerase III complex)	NA	NA	NA	4.15178	3.48749	4.51447	6.18448	6.70332	6.18539	8.34736	7.75868	6.01254	7.50832	9.31556	10.0995	11.727	10.2454	11.2655	2.42902e-25	5.24046e-25
Bv3_068610_iiyf	blue	473.281	PREDICTED: F-box/kelch-repeat protein At2g44130 [Beta vulgaris subsp. vulgaris]	GO:0004842(ubiquitin-protein transferase activity);GO:0031463(Cul3-RING ubiquitin ligase complex)	NA	NA	NA	18.9557	24.0187	21.7943	12.7522	11.0438	12.5863	25.7307	25.2139	26.6813	30.6974	27.9881	26.5185	119.352	116.898	115.374	0	0
Bv9_203200_snpi	blue	473.194	PREDICTED: L-aspartate oxidase, chloroplastic-like [Beta vulgaris subsp. vulgaris]	GO:0005739(mitochondrion);GO:0008734(L-aspartate oxidase activity);GO:0009435(NAD biosynthetic process);GO:0009507(chloroplast);GO:0044318(L-aspartate:fumarate oxidoreductase activity);GO:0055114(oxidation-reduction process)	00250(Alanine, aspartate and glutamate metabolism);00760(Nicotinate and nicotinamide metabolism)	K00278	EC:1.4.3.16	39.202	36.0377	41.6957	25.4396	19.2228	22.5979	29.1665	30.7455	30.65	28.2447	27.637	26.2195	9.37922	10.7416	9.30474	5.73965e-57	2.20556e-56
Bv9_215060_ajar	blue	473.135	PREDICTED: probable protein phosphatase 2C 9 [Beta vulgaris subsp. vulgaris]	GO:0004722(protein serine/threonine phosphatase activity);GO:0005634(nucleus);GO:0005886(plasma membrane);GO:0006470(protein dephosphorylation);GO:0046872(metal ion binding)	NA	NA	NA	351.85	365.839	395.992	386.067	367.876	394.423	235.342	240.566	244.758	257.487	245.618	244.674	185.671	184.045	181.038	1.25517e-102	7.97787e-102
Bv3_056130_udak	blue	472.986	PREDICTED: uncharacterized protein LOC104888706 [Beta vulgaris subsp. vulgaris]	GO:0005576(extracellular region);GO:0009507(chloroplast);GO:0048037(cofactor binding)	NA	NA	NA	5.88199	5.31144	5.47611	4.747	5.79385	4.48852	10.0524	10.099	9.44607	9.42908	7.98712	8.43054	12.4496	10.9494	12.7542	1.04028e-35	2.78822e-35
Bv9_225560_aapt	blue	472.935	hypothetical protein BVRB_9g225560 [Beta vulgaris subsp. vulgaris]	GO:0035251(UDP-glucosyltransferase activity);GO:1900994((-)-secologanin biosynthetic process)	NA	NA	NA	17.4681	17.1828	18.1435	20.4563	22.1328	22.0844	15.9022	18.8229	17.3803	37.7983	33.4382	35.9489	60.8822	68.987	62.9825	9.55516e-141	8.20948e-140
Bv8_197100_xydu	blue	472.912	PREDICTED: probable glycosyltransferase At5g03795 [Beta vulgaris subsp. vulgaris];hypothetical protein BVRB_8g197100 isoform D [Beta vulgaris subsp. vulgaris]	GO:0003824(catalytic activity);GO:0005794(Golgi apparatus);GO:0008150(biological_process);GO:0016020(membrane);GO:0016020(membrane)	NA	NA	NA	53.539	51.8145	59.904	52.6632	50.1675	58.664	55.9642	52.604	56.2102	77.51	68.4006	73.3245	114.631	112.691	108.19	4.57657e-51	1.59462e-50
Bv_039480_ptma	blue	472.872	hypothetical protein M569_00222, partial [Genlisea aurea]	NA	NA	NA	NA	0.847286	10.1186	1.14215	5.34053	5.98613	5.9208	15.1069	13.4855	16.2495	8.83433	6.85557	6.74788	28.7817	27.5443	34.8166	1.26042e-08	1.6726e-08
Bv6_138410_upxu	blue	472.73	hypothetical protein BVRB_6g138410 [Beta vulgaris subsp. vulgaris]	NA	NA	NA	NA	0.237721	0.601146	0.246235	21.5713	20.8093	19.3143	36.7787	36.3494	34.7692	16.18	14.7611	16.7102	40.6057	43.523	40.0535	0	0
Bv9_218350_wuan	blue	472.413	hypothetical protein BVRB_9g218350 [Beta vulgaris subsp. vulgaris]	GO:0003677(DNA binding);GO:0003700(DNA binding transcription factor activity);GO:0005634(nucleus);GO:0005773(vacuole);GO:0006351(transcription, DNA-templated);GO:0006355(regulation of transcription, DNA-templated)	NA	NA	NA	1.73069	1.24136	1.98213	5.17857	5.58271	5.58062	6.01467	3.86844	5.42728	3.82614	5.05992	5.46584	7.44863	8.82608	9.13704	4.06643e-16	6.85163e-16
Bv3_054390_koft	blue	471.692	PREDICTED: DNA replication complex GINS protein SLD5 [Beta vulgaris subsp. vulgaris]	GO:0000727(double-strand break repair via break-induced replication);GO:0000811(GINS complex);GO:0006270(DNA replication initiation);GO:0031298(replication fork protection complex);GO:0043138(3'-5' DNA helicase activity)	NA	NA	NA	5.9719	5.61082	4.51765	9.9859	10.0982	8.55176	13.4806	10.7169	11.8544	13.3927	13.6398	15.1087	15.7489	15.4321	16.0051	1.01735e-30	2.47574e-30
Bv_000370_cufa	blue	471.662	PREDICTED: homeobox-leucine zipper protein ATHB-12-like [Beta vulgaris subsp. vulgaris]	GO:0003700(DNA binding transcription factor activity);GO:0005515(protein binding);GO:0005634(nucleus);GO:0006351(transcription, DNA-templated);GO:0006355(regulation of transcription, DNA-templated);GO:0006970(response to osmotic stress);GO:0007275(multicellular organism development);GO:0009414(response to water deprivation);GO:0009615(response to virus);GO:0009651(response to salt stress);GO:0009…	NA	NA	NA	5.94078	5.92632	6.06844	29.274	23.4201	23.2954	49.8323	53.5418	53.1589	20.2413	18.3981	18.7451	62.9162	69.4858	64.8973	1e-306	2e-305
Bv3_065320_qfrh	blue	471.6	hypothetical protein BVRB_3g065320 [Beta vulgaris subsp. vulgaris]	NA	NA	NA	NA	5.79925	4.50378	4.92204	4.14901	4.66068	5.31937	3.23722	2.58923	3.33111	2.88951	2.60877	3.58977	1.96619	1.33979	1.19813	8.71168e-20	1.62735e-19
Bv6_132850_ysir	blue	471.458	PREDICTED: pentatricopeptide repeat-containing protein At5g24830 [Beta vulgaris subsp. vulgaris]	GO:0003723(RNA binding);GO:0005739(mitochondrion);GO:0008150(biological_process);GO:0009451(RNA modification)	NA	NA	NA	3.74705	3.89538	3.90327	3.65532	5.45493	4.08397	5.39865	4.11063	4.43555	5.45749	5.02447	4.32466	8.50956	8.01574	8.41044	7.33213e-13	1.11871e-12
Bv4_091730_afia	blue	471.06	PREDICTED: B3 domain-containing protein Os04g0386900-like [Beta vulgaris subsp. vulgaris]	NA	NA	NA	NA	0.294311	0.123453	0.135745	1.21475	1.24003	0.489016	5.42451	6.58855	4.96676	5.31338	4.23038	3.95257	5.98745	8.91991	7.12995	5.76378e-51	2.0057e-50
Bv6_150280_xkfx	blue	470.961	hypothetical protein BVRB_6g150280 [Beta vulgaris subsp. vulgaris]	NA	NA	NA	NA	28.3216	28.6515	32.7541	70.9816	81.4611	77.4641	69.4126	89.8612	91.6154	38.9697	37.5237	38.0952	166.795	178.015	172.374	4.87301e-207	6.37827e-206
Bv6_154200_ygec	blue	470.665	PREDICTED: transcription factor TCP15 [Beta vulgaris subsp. vulgaris]	GO:0003677(DNA binding);GO:0003700(DNA binding transcription factor activity);GO:0005515(protein binding);GO:0005634(nucleus);GO:0006351(transcription, DNA-templated);GO:0006355(regulation of transcription, DNA-templated);GO:0008283(cell proliferation);GO:0009735(response to cytokinin);GO:0009737(response to abscisic acid);GO:0009739(response to gibberellin);GO:0010029(regulation of seed germinat…	04712(Circadian rhythm - plant)	K16221	NA	1.26525	1.52948	1.19422	0.873518	1.07499	0.845706	3.93167	4.51105	2.94997	2.63772	3.35571	3.62406	6.19806	4.98368	5.85789	7.9032e-42	2.36175e-41
Bv5_114330_eyep	blue	470.665	PREDICTED: putative pentatricopeptide repeat-containing protein At1g74400 isoform X2 [Beta vulgaris subsp. vulgaris]	GO:0003674(molecular_function);GO:0005739(mitochondrion);GO:0008150(biological_process)	03440(Homologous recombination)	K10683	NA	1.78546	1.67926	1.86276	2.39993	2.03539	1.7962	1.70356	2.27428	2.18851	3.37203	3.54016	3.11211	4.73738	4.4699	5.1476	9.36637e-22	1.8446e-21
Bv4_071570_undk	blue	470.093	PREDICTED: probable plastid-lipid-associated protein 12, chloroplastic [Beta vulgaris subsp. vulgaris]	GO:0005198(structural molecule activity);GO:0009507(chloroplast);GO:0009534(chloroplast thylakoid);GO:0009535(chloroplast thylakoid membrane);GO:0009941(chloroplast envelope);GO:0016020(membrane)	NA	NA	NA	1.37741	1.24354	0.605408	1.03524	1.50707	1.7021	2.16594	1.62013	1.47667	2.23012	2.12082	2.03493	2.90435	3.73	3.49153	3.7514e-07	4.73925e-07
Bv_008560_eksu	blue	469.633	PREDICTED: uncharacterized protein LOC104884460 [Beta vulgaris subsp. vulgaris]	GO:0003674(molecular_function);GO:0005515(protein binding);GO:0005802(trans-Golgi network);GO:0005886(plasma membrane);GO:0008017(microtubule binding);GO:0008150(biological_process);GO:0009507(chloroplast);GO:0016021(integral component of membrane)	NA	NA	NA	113.461	104.625	115.299	63.971	62.7799	67.4023	44.6982	47.0119	50.6799	80.1266	74.2705	74.988	34.7638	29.6384	34.9842	6.52885e-122	4.86689e-121
Bv9_221110_kzoy	blue	469.592	PREDICTED: uncharacterized protein At4g06598 [Beta vulgaris subsp. vulgaris]	GO:0003677(DNA binding);GO:0003700(DNA binding transcription factor activity);GO:0005634(nucleus);GO:0006355(regulation of transcription, DNA-templated)	NA	NA	NA	25.0481	26.9724	24.1702	31.485	29.6035	29.5745	24.3358	29.3114	26.8658	34.2573	33.3898	34.4636	51.2778	56.8169	48.0313	1.43545e-36	3.90474e-36
Bv2_028360_kfyw	blue	469.514	PREDICTED: GDSL esterase/lipase 7 [Beta vulgaris subsp. vulgaris]	GO:0005576(extracellular region);GO:0016042(lipid catabolic process);GO:0016298(lipase activity);GO:0016788(hydrolase activity, acting on ester bonds);GO:0052689(carboxylic ester hydrolase activity)	00561(Glycerolipid metabolism)	K00679	EC:2.3.1.158	1.38776	1.86652	1.16389	2.08501	2.35813	2.40205	3.79186	2.76862	2.18005	2.59461	2.31604	3.29423	4.54849	4.42666	4.22667	1.94664e-06	2.39904e-06
Bv7_157650_ryeg	blue	469.295	PREDICTED: uncharacterized protein LOC104898211 isoform X1 [Beta vulgaris subsp. vulgaris];PREDICTED: uncharacterized protein LOC104898211 isoform X2 [Beta vulgaris subsp. vulgaris]	GO:0005634(nucleus);GO:0006281(DNA repair);GO:0055114(oxidation-reduction process);GO:0055114(oxidation-reduction process)	NA	NA	NA	4.82205	4.08694	4.58646	5.22027	6.45144	6.5996	9.23571	7.97107	8.17157	7.66268	5.40209	7.79245	11.2118	9.46053	10.4278	1.92839e-14	3.08383e-14
Bv4_077100_kaci	blue	469.228	PREDICTED: probable leucine-rich repeat receptor-like protein kinase At5g63930 [Beta vulgaris subsp. vulgaris]	GO:0004672(protein kinase activity);GO:0004674(protein serine/threonine kinase activity);GO:0005524(ATP binding);GO:0005886(plasma membrane);GO:0006468(protein phosphorylation);GO:0007169(transmembrane receptor protein tyrosine kinase signaling pathway);GO:0016021(integral component of membrane)	NA	NA	NA	18.6654	18.7925	20.46	29.9172	26.2005	27.5387	21.4679	20.6051	21.0765	26.2662	26.1874	27.2438	45.0906	45.3557	49.3984	5.23104e-86	2.82607e-85
Bv6_150230_cuxf	blue	468.97	PREDICTED: leucine-rich repeat extensin-like protein 3 [Beta vulgaris subsp. vulgaris]	GO:0003674(molecular_function);GO:0005739(mitochondrion);GO:0008150(biological_process)	NA	NA	NA	1.25446	0.731574	1.07193	0.294361	0.587796	0.623201	1.6214	2.20135	2.77715	1.94152	1.79448	2.34865	3.90256	5.01622	5.03114	2.56255e-23	5.26748e-23
Bv9_209500_fuun	blue	468.887	PREDICTED: zinc finger protein MAGPIE [Beta vulgaris subsp. vulgaris]	GO:0003676(nucleic acid binding);GO:0003700(DNA binding transcription factor activity);GO:0005515(protein binding);GO:0005634(nucleus);GO:0006351(transcription, DNA-templated);GO:0006355(regulation of transcription, DNA-templated);GO:0008270(zinc ion binding);GO:0008356(asymmetric cell division);GO:0044212(transcription regulatory region DNA binding);GO:0046872(metal ion binding);GO:0048364(root …	00052(Galactose metabolism);00600(Sphingolipid metabolism);00531(Glycosaminoglycan degradation);00604(Glycosphingolipid biosynthesis - ganglio series);00511(Other glycan degradation)	K12309	EC:3.2.1.23	20.064	20.6546	20.2651	14.9806	15.0395	16.457	28.34	26.0207	26.8849	35.4055	31.3718	28.238	41.7994	44.1338	43.8946	5.81765e-51	2.0237e-50
Bv7_173790_iwno	blue	468.727	hypothetical protein BVRB_7g173790 [Beta vulgaris subsp. vulgaris]	GO:0004672(protein kinase activity);GO:0005524(ATP binding);GO:0005886(plasma membrane);GO:0006468(protein phosphorylation);GO:0016301(kinase activity);GO:0016310(phosphorylation)	NA	NA	NA	6.0153	5.23351	5.51044	11.7332	6.38034	9.25634	7.37633	13.2239	14.5586	11.8213	12.3136	11.5785	17.9361	20.8134	18.9805	2.36708e-11	3.44146e-11
Bv7_172070_drpr	blue	468.725	PREDICTED: phosphoinositide phospholipase C 4 [Beta vulgaris subsp. vulgaris]	GO:0004435(phosphatidylinositol phospholipase C activity);GO:0005829(cytosol);GO:0005886(plasma membrane);GO:0006629(lipid metabolic process);GO:0007165(signal transduction);GO:0016042(lipid catabolic process);GO:0035556(intracellular signal transduction)	00562(Inositol phosphate metabolism);04070(Phosphatidylinositol signaling system);04933(AGE-RAGE signaling pathway in diabetic complications)	K05857	EC:3.1.4.11	4.9169	3.75271	3.81563	5.47486	7.27832	7.62124	34.1011	35.9183	32.6405	25.3566	30.9796	34.254	41.8617	39.0115	40.2807	3.50954e-194	4.25608e-193
Bv4_079510_opmp	blue	468.343	PREDICTED: uncharacterized protein LOC104890635 isoform X1 [Beta vulgaris subsp. vulgaris]	NA	NA	NA	NA	2.54602	2.39569	2.86911	3.91222	4.64444	5.32511	5.25571	4.68687	4.02697	4.11528	5.45698	4.67915	7.50763	6.76436	6.42954	1.05996e-16	1.81627e-16
Bv_004010_xgeu	blue	468.17	PREDICTED: uncharacterized protein LOC104883852 isoform X2 [Beta vulgaris subsp. vulgaris]	GO:0003674(molecular_function);GO:0005576(extracellular region);GO:0008150(biological_process);GO:0016021(integral component of membrane)	NA	NA	NA	5.8446	5.51108	5.10281	6.455	7.26397	7.23895	5.89281	6.6712	6.21274	7.26659	6.46026	7.42287	10.2742	12.3137	10.8863	1.55833e-27	3.53352e-27
Bv2_045510_uuuz	blue	468.051	PREDICTED: probable xyloglucan endotransglucosylase/hydrolase protein 5 [Beta vulgaris subsp. vulgaris]	GO:0004553(hydrolase activity, hydrolyzing O-glycosyl compounds);GO:0005576(extracellular region);GO:0005618(cell wall);GO:0010411(xyloglucan metabolic process);GO:0016762(xyloglucan:xyloglucosyl transferase activity);GO:0016798(hydrolase activity, acting on glycosyl bonds);GO:0042546(cell wall biogenesis);GO:0048046(apoplast);GO:0071555(cell wall organization)	NA	NA	NA	6.35421	8.03969	7.90737	5.58636	6.57227	6.51546	13.5594	13.6177	12.5388	25.4783	25.4941	26.7955	35.3214	36.9134	32.4181	5.11984e-125	3.91024e-124
Bv5_122361z1667	blue	467.842	hypothetical protein BVRB_4g078970 [Beta vulgaris subsp. vulgaris]	NA	NA	NA	NA	0.0001	0.13598	0.15542	0.0001	0.0001	0.0001	1.46292	1.53825	1.46496	0.0001	0.0001	0.0001	4.5886	4.67035	4.80577	2.87319e-86	1.55801e-85
Bv7_168770_skhg	blue	467.781	PREDICTED: probable xyloglucan glycosyltransferase 5 [Beta vulgaris subsp. vulgaris]	GO:0000139(Golgi membrane);GO:0005634(nucleus);GO:0005794(Golgi apparatus);GO:0016021(integral component of membrane);GO:0016757(transferase activity, transferring glycosyl groups);GO:0016759(cellulose synthase activity);GO:0071555(cell wall organization)	NA	NA	NA	511.388	499.607	509.95	461.536	435.268	454.004	472.398	436.393	443.867	492.355	494.771	513.858	247.186	235.88	248.799	1.47483e-87	8.09682e-87
Bv5_118360_uaux	blue	467.73	PREDICTED: uncharacterized protein LOC104894419 [Beta vulgaris subsp. vulgaris]	GO:0003674(molecular_function);GO:0005739(mitochondrion);GO:0008150(biological_process)	NA	NA	NA	4.51428	4.18441	4.65278	7.21669	7.44071	6.75593	9.9428	6.45937	8.82285	7.3534	7.55032	8.10826	11.5361	9.89827	10.7644	6.06939e-16	1.01741e-15
Bv_007530_cpkf	blue	467.681	hypothetical protein BVRB_007530 [Beta vulgaris subsp. vulgaris]	GO:0003674(molecular_function);GO:0005634(nucleus);GO:0008150(biological_process)	00270(Cysteine and methionine metabolism)	K17398	EC:2.1.1.37	9.59869	9.21187	10.5434	15.0219	15.5151	16.0206	12.0476	13.0887	12.481	14.6863	14.3018	14.4757	22.6064	19.3647	20.0939	2.466e-44	7.70535e-44
Bv2_046690_mhgk	blue	467.658	hypothetical protein BVRB_2g046690 isoform A [Beta vulgaris subsp. vulgaris];hypothetical protein BVRB_2g046690 isoform B [Beta vulgaris subsp. vulgaris]	NA	00562(Inositol phosphate metabolism);04070(Phosphatidylinositol signaling system);04070(Phosphatidylinositol signaling system)	K00913	EC:2.7.1.159;EC:2.7.1.134	0.0546207	0.0001	0.0001	0.0001	0.0001	0.0001	0.0001	0.104338	0.0001	0.872653	0.81427	0.766246	1.87399	1.57938	1.76149	4.61095e-25	9.87266e-25
Bv5_112740_owis	blue	467.513	PREDICTED: omega-hydroxypalmitate O-feruloyl transferase [Beta vulgaris subsp. vulgaris]	GO:0005737(cytoplasm);GO:0010345(suberin biosynthetic process);GO:0016740(transferase activity);GO:0016747(transferase activity, transferring acyl groups other than amino-acyl groups);GO:0050734(hydroxycinnamoyltransferase activity);GO:0052325(cell wall pectin biosynthetic process);GO:0102406(omega-hydroxypalmitate O-sinapoyl transferase activity)	00073(Cutin, suberine and wax biosynthesis)	K15400	EC:2.3.1.188	3.18905	2.70209	3.32832	11.4177	11.7902	10.8176	30.809	30.9826	31.0231	34.3864	35.5177	33.8014	37.7785	37.6898	38.896	0	0
Bv2_035330_sezc	blue	467.386	PREDICTED: probable nucleoredoxin 3 [Beta vulgaris subsp. vulgaris]	GO:0004791(thioredoxin-disulfide reductase activity);GO:0005634(nucleus);GO:0005737(cytoplasm);GO:0045454(cell redox homeostasis);GO:0047134(protein-disulfide reductase activity);GO:0055114(oxidation-reduction process)	NA	NA	NA	3.24611	2.85662	3.33347	2.55542	2.34135	2.821	6.51977	5.24218	6.67222	3.22177	3.1865	2.44198	15.9058	16.3615	16.5362	1.47789e-110	1.0104e-109
Bv9_215720_dyqz	blue	467.38	hypothetical protein BVRB_9g215720 [Beta vulgaris subsp. vulgaris]	NA	NA	NA	NA	1.47348	0.621001	0.689135	2.07187	1.54637	0.829768	2.82424	3.93347	2.81202	3.8626	3.04407	2.1829	4.96734	5.21254	4.37934	1.35691e-07	1.741e-07
Bv4_077070_kick	blue	467.284	PREDICTED: pentatricopeptide repeat-containing protein At5g18390, mitochondrial [Beta vulgaris subsp. vulgaris]	GO:0003674(molecular_function);GO:0003723(RNA binding);GO:0005739(mitochondrion);GO:0008150(biological_process);GO:0009451(RNA modification)	NA	NA	NA	10.5304	7.70552	11.5655	15.019	18.7126	16.8484	15.1493	16.8381	16.1	17.8773	20.1681	17.8668	23.2105	29.299	24.2554	2.04329e-16	3.47488e-16
Bv7_176770_rsyi	blue	467.262	PREDICTED: protein ROOT HAIR DEFECTIVE 3 [Beta vulgaris subsp. vulgaris]	GO:0000139(Golgi membrane);GO:0005525(GTP binding);GO:0005634(nucleus);GO:0005737(cytoplasm);GO:0005774(vacuolar membrane);GO:0005783(endoplasmic reticulum);GO:0005789(endoplasmic reticulum membrane);GO:0005886(plasma membrane);GO:0006888(ER to Golgi vesicle-mediated transport);GO:0009832(plant-type cell wall biogenesis);GO:0009932(cell tip growth);GO:0010053(root epidermal cell differentiation);…	NA	NA	NA	6.81224	7.58646	8.01226	20.7578	20.0939	18.5067	22.9346	23.4508	23.9123	26.7201	26.5712	31.6433	30.9451	33.914	31.7578	3.56959e-111	2.45372e-110
Bv5_110840_fsfm	blue	467.184	PREDICTED: aluminum-activated malate transporter 9 [Beta vulgaris subsp. vulgaris]	GO:0009705(plant-type vacuole membrane);GO:0015140(malate transmembrane transporter activity)	NA	NA	NA	3.95729	3.36348	3.31322	4.13482	3.73365	3.72584	7.32041	5.7767	8.17569	5.90142	5.21065	5.49948	8.59706	7.94797	8.93245	8.44691e-23	1.71002e-22
Bv9_224700_trzx	blue	467.131	PREDICTED: protein IQ-DOMAIN 14 [Beta vulgaris subsp. vulgaris]	GO:0005516(calmodulin binding);GO:0005794(Golgi apparatus);GO:0008150(biological_process)	NA	NA	NA	16.3659	14.816	15.4543	18.0412	17.3995	17.6587	23.2119	23.7652	20.9175	32.4413	32.0548	31.3568	34.6668	36.9215	35.7158	1.44407e-41	4.29576e-41
Bv3_068600_rzac	blue	467.121	PREDICTED: F-box/kelch-repeat protein At2g44130 [Beta vulgaris subsp. vulgaris]	GO:0004842(ubiquitin-protein transferase activity);GO:0031463(Cul3-RING ubiquitin ligase complex)	NA	NA	NA	8.08428	8.22823	8.07679	5.26484	6.30663	6.84774	10.2162	10.9955	10.2726	11.4822	9.80909	10.5775	68.8446	68.3412	65.8265	0	0
Bv7_172810_hgfi	blue	467.037	PREDICTED: serine/arginine-rich splicing factor SR45a isoform X1 [Beta vulgaris subsp. vulgaris]	GO:0003676(nucleic acid binding);GO:0003723(RNA binding);GO:0005681(spliceosomal complex);GO:0006397(mRNA processing);GO:0008380(RNA splicing);GO:0009644(response to high light intensity);GO:0016021(integral component of membrane);GO:0016607(nuclear speck);GO:0043484(regulation of RNA splicing)	03040(Spliceosome)	K12897	NA	113.697	112.987	115.029	248.843	255.986	259.18	250.084	241.642	246.415	157.962	143.825	154.728	390.398	408.796	410.051	3.77014e-245	6.03318e-244
Bv6_136350_roxt	blue	466.858	PREDICTED: pre-mRNA-splicing factor ATP-dependent RNA helicase DEAH10 [Beta vulgaris subsp. vulgaris]	GO:0004004(ATP-dependent RNA helicase activity);GO:0005737(cytoplasm);GO:0006396(RNA processing);GO:0006396(RNA processing)	03040(Spliceosome);03040(Spliceosome)	K12818	EC:3.6.4.13	16.5277	16.208	14.2859	30.024	25.5378	26.9252	23.8591	23.2389	22.4371	22.0542	21.9314	25.5239	34.5408	36.0768	35.1739	5.44223e-45	1.71889e-44
Bv8_193530_jjoz	blue	466.828	hypothetical protein BVRB_8g193530 [Beta vulgaris subsp. vulgaris]	NA	NA	NA	NA	0.0993893	0.13949	0.154605	0.897894	1.12168	0.755861	0.580416	0.642026	0.645008	0.9583	1.05232	0.633781	1.45021	1.82529	1.73068	6.06422e-11	8.69675e-11
Bv6_151740_frza	blue	466.795	hypothetical protein BVRB_6g151740 [Beta vulgaris subsp. vulgaris]	GO:0005524(ATP binding);GO:0005777(peroxisome);GO:0005886(plasma membrane);GO:0009409(response to cold);GO:0009414(response to water deprivation);GO:0009651(response to salt stress);GO:0009737(response to abscisic acid);GO:0009738(abscisic acid-activated signaling pathway);GO:0009942(longitudinal axis specification);GO:0009945(radial axis specification);GO:0016021(integral component of membrane);…	NA	NA	NA	3.50178	3.3612	4.12893	7.30732	7.31179	7.24085	5.2476	5.98471	4.61789	6.1073	7.13579	7.5555	10.9228	10.5281	10.7209	3.00123e-50	1.0347e-49
Bv4_087200_teje	blue	466.569	PREDICTED: uncharacterized protein LOC104891580 [Beta vulgaris subsp. vulgaris]	NA	NA	NA	NA	0.218515	0.264284	0.147444	0.817968	0.277793	0.35293	2.47224	1.17389	1.6082	0.943803	1.42726	1.08385	3.50538	2.35055	3.1165	1.82573e-18	3.2844e-18
Bv1_014760_qnmc	blue	466.464	PREDICTED: phytosulfokines [Beta vulgaris subsp. vulgaris]	NA	NA	NA	NA	0.138822	0.140421	0.240404	0.139772	0.310016	0.122162	0.555172	0.439386	1.00076	1.7575	0.557727	0.717246	3.87119	2.65893	3.09472	5.13581e-19	9.39042e-19
Bv9_222610_ruuh	blue	466.327	hypothetical protein BVRB_9g222610 [Beta vulgaris subsp. vulgaris]	NA	NA	NA	NA	0.0001	0.0001	0.0001	0.355411	0.61077	0.0001	0.0001	0.292352	0.585466	0.709784	0.592864	0.0001	2.59696	2.28981	2.23112	1.78124e-05	2.12044e-05
Bv6_127900_qzuu	blue	466.015	PREDICTED: BTB/POZ domain-containing protein At5g67385 isoform X1 [Beta vulgaris subsp. vulgaris]	GO:0005515(protein binding);GO:0005886(plasma membrane);GO:0009416(response to light stimulus);GO:0016567(protein ubiquitination);GO:0042742(defense response to bacterium)	03050(Proteasome)	K03063	NA	14.3382	13.5365	13.387	9.26693	8.38302	8.2742	13.6462	14.3668	16.6504	20.5386	20.1022	19.6537	37.6556	37.7871	35.1409	1.41878e-109	9.5928e-109
Bv2_036240_acqd	blue	465.93	hypothetical protein BVRB_2g036240 [Beta vulgaris subsp. vulgaris]	NA	NA	NA	NA	2.03272	2.71935	1.69428	4.2478	3.51262	2.7549	4.78091	4.20271	3.7143	4.19797	4.00978	3.89974	5.30671	5.70947	5.46475	3.35245e-12	5.0056e-12
Bv5_124700_pjux	blue	465.332	PREDICTED: SWI/SNF complex subunit SWI3A isoform X2 [Beta vulgaris subsp. vulgaris];PREDICTED: SWI/SNF complex subunit SWI3A isoform X1 [Beta vulgaris subsp. vulgaris]	GO:0003677(DNA binding);GO:0005634(nucleus);GO:0006338(chromatin remodeling);GO:0006351(transcription, DNA-templated);GO:0006355(regulation of transcription, DNA-templated);GO:0007275(multicellular organism development);GO:0016514(SWI/SNF complex);GO:0016569(covalent chromatin modification);GO:0016569(covalent chromatin modification)	NA	NA	NA	38.877	40.0312	44.6516	85.7512	91.14	87.3172	90.7821	80.564	81.3074	79.4936	80.5902	82.8184	112.198	104.232	108.117	4.42411e-78	2.20555e-77
Bv5_103580_qnix	blue	465.182	PREDICTED: methyltransferase-like protein 17, mitochondrial [Beta vulgaris subsp. vulgaris]	GO:0005739(mitochondrion);GO:0006412(translation);GO:0008168(methyltransferase activity);GO:0032259(methylation)	00480(Glutathione metabolism)	K01469	EC:3.5.2.9	7.80376	7.53092	7.3773	11.7344	11.3971	10.6876	10.1378	9.38861	9.12165	14.7833	14.4979	16.7319	19.6969	19.9536	19.1581	6.72831e-56	2.53719e-55
Bv1_003470_ghtq	blue	465.048	PREDICTED: protein ENHANCED DISEASE RESISTANCE 4 [Beta vulgaris subsp. vulgaris]	GO:0003674(molecular_function);GO:0005634(nucleus);GO:0005886(plasma membrane);GO:0008150(biological_process)	NA	NA	NA	45.8402	47.4652	44.8315	101.257	88.8833	89.1066	112.984	113.365	108.431	77.2329	80.5425	84.9206	131.978	120.111	127.654	6.55282e-104	4.20724e-103
Bv3_052790_xtre	blue	465.038	PREDICTED: hevamine-A [Beta vulgaris subsp. vulgaris]	GO:0004568(chitinase activity);GO:0005576(extracellular region);GO:0006032(chitin catabolic process);GO:0008061(chitin binding)	00520(Amino sugar and nucleotide sugar metabolism)	K01183	EC:3.2.1.14	0.769474	0.490723	0.755005	1.00964	1.2051	1.56214	0.919919	0.692376	1.22562	3.75843	2.21682	3.26949	5.97519	6.69185	7.89551	3.05762e-36	8.26527e-36
Bv9_212230_yxwf	blue	464.723	PREDICTED: uncharacterized CRM domain-containing protein At3g25440, chloroplastic [Beta vulgaris subsp. vulgaris]	GO:0003723(RNA binding);GO:0009507(chloroplast)	03018(RNA degradation)	K01148	EC:3.1.13.4	4.71839	4.00074	3.7321	7.80309	6.97512	6.30555	4.82297	6.08614	7.19525	8.18937	9.29263	9.66574	13.3907	14.1191	11.3396	2.49442e-19	4.60387e-19
Bv4_094160_ojnf	blue	464.536	PREDICTED: interactor of constitutive active ROPs 4 [Beta vulgaris subsp. vulgaris]	GO:0003674(molecular_function);GO:0005576(extracellular region);GO:0008150(biological_process)	03013(RNA transport)	K03231	NA	7.07627	6.31301	6.9936	9.4863	9.59521	9.50194	9.00107	9.28806	7.99488	12.4066	12.4353	12.2315	14.4533	14.0576	14.536	6.71842e-46	2.1535e-45
Bv2_026900_yyoi	blue	464.223	PREDICTED: protein ABA DEFICIENT 4, chloroplastic [Beta vulgaris subsp. vulgaris]	GO:0009517(PSII associated light-harvesting complex II);GO:0009688(abscisic acid biosynthetic process);GO:0009941(chloroplast envelope);GO:0010117(photoprotection);GO:0016021(integral component of membrane);GO:0016122(xanthophyll metabolic process);GO:0031969(chloroplast membrane);GO:0032928(regulation of superoxide anion generation)	NA	NA	NA	4.83302	5.97827	5.69755	11.3254	9.8592	10.8113	9.97375	9.89159	9.4198	10.4806	9.77486	9.26342	13.4787	15.2052	12.553	8.46106e-37	2.3103e-36
Bv5_123110_fchk	blue	464.22	hypothetical protein BVRB_5g123110 [Beta vulgaris subsp. vulgaris]	NA	NA	NA	NA	4.14757	4.57558	3.91395	5.52427	5.30567	5.13955	6.08274	4.86626	5.6177	7.95984	7.26539	9.49799	10.5852	10.1154	10.3568	1.41444e-26	3.13643e-26
Bv3_058440_toia	blue	464.217	PREDICTED: thioredoxin-like 1-1, chloroplastic [Beta vulgaris subsp. vulgaris]	GO:0000103(sulfate assimilation);GO:0006457(protein folding);GO:0009507(chloroplast);GO:0015035(protein disulfide oxidoreductase activity);GO:0016671(oxidoreductase activity, acting on a sulfur group of donors, disulfide as acceptor);GO:0034599(cellular response to oxidative stress);GO:0045454(cell redox homeostasis);GO:0055114(oxidation-reduction process)	NA	NA	NA	3.82238	4.21043	4.45999	10.638	11.4919	11.5721	19.6483	19.7595	18.2181	6.27366	5.7991	6.66257	29.2342	28.4017	29.4958	0	0
Bv4_071880_xrfg	blue	464.208	PREDICTED: F-box protein CPR30-like [Beta vulgaris subsp. vulgaris]	GO:0004842(ubiquitin-protein transferase activity);GO:0019005(SCF ubiquitin ligase complex);GO:0031146(SCF-dependent proteasomal ubiquitin-dependent protein catabolic process)	NA	NA	NA	3.40081	3.46785	2.89853	2.8501	3.01678	2.61538	2.3429	2.27374	2.66754	1.10989	0.864995	1.09679	0.0001	0.105386	0.60754	3.02869e-11	4.38523e-11
Bv1_000240_ccns	blue	464.083	PREDICTED: uncharacterized protein LOC104905404 [Beta vulgaris subsp. vulgaris]	GO:0003676(nucleic acid binding);GO:0003700(DNA binding transcription factor activity);GO:0005634(nucleus);GO:0006355(regulation of transcription, DNA-templated);GO:0008270(zinc ion binding)	NA	NA	NA	7.69257	6.49499	9.21	7.47617	6.89159	7.63198	9.15737	8.42344	9.49907	14.1529	13.0424	16.6777	21.3858	22.7989	26.3545	7.48765e-54	2.72918e-53
Bv5_115300_cjoq	blue	463.718	PREDICTED: protein NRT1/ PTR FAMILY 2.11 [Beta vulgaris subsp. vulgaris]	GO:0005215(transporter activity);GO:0005886(plasma membrane);GO:0006857(oligopeptide transport);GO:0009506(plasmodesma);GO:0016020(membrane);GO:0016021(integral component of membrane);GO:0055085(transmembrane transport);GO:0080167(response to karrikin);GO:0090448(glucosinolate:proton symporter activity);GO:0090449(phloem glucosinolate loading);GO:1901349(glucosinolate transport)	NA	NA	NA	0.607039	0.360709	0.332682	0.380634	0.667727	0.4567	1.15395	1.3061	1.40355	0.623047	0.653444	0.499849	3.09649	2.37032	3.36709	5.23826e-36	1.40917e-35
Bv3_062040_fxpk	blue	463.22	PREDICTED: probable calcium-binding protein CML49 [Beta vulgaris subsp. vulgaris]	GO:0004198(calcium-dependent cysteine-type endopeptidase activity);GO:0005737(cytoplasm);GO:0006508(proteolysis)	04626(Plant-pathogen interaction)	K13448	NA	86.9865	80.1763	77.8839	65.3248	71.1696	67.3778	95.4047	81.5959	91.2433	168.426	182.181	180.697	261.093	274.93	276.867	1.91614e-257	3.2528e-256
Bv9_206560_rgug	blue	463.047	PREDICTED: GPI-anchored protein LLG1 [Beta vulgaris subsp. vulgaris]	GO:0005515(protein binding);GO:0005886(plasma membrane);GO:0031225(anchored component of membrane);GO:0045927(positive regulation of growth);GO:0090406(pollen tube)	NA	NA	NA	207.127	190.324	193.294	175.696	160.588	177.419	164.725	140.54	138.165	188.306	183.873	193.409	91.7338	84.0393	89.8576	9.84746e-55	3.64318e-54
Bv1_017200_kzey	blue	462.832	hypothetical protein BVRB_1g017200 [Beta vulgaris subsp. vulgaris]	GO:0010162(seed dormancy process);GO:0043161(proteasome-mediated ubiquitin-dependent protein catabolic process);GO:0061630(ubiquitin protein ligase activity)	NA	NA	NA	0.104379	0.178814	0.0254108	0.455064	0.533125	0.576332	6.36147	4.98339	5.4491	1.61366	1.05425	2.04703	7.82126	7.42221	7.35062	1.63044e-146	1.44599e-145
Bv4_084380_yazu	blue	462.734	PREDICTED: probable acyl-activating enzyme 6 [Beta vulgaris subsp. vulgaris]	GO:0006631(fatty acid metabolic process);GO:0009507(chloroplast);GO:0016874(ligase activity)	NA	NA	NA	0.0001	0.0254224	0.0001	1.16455	0.821398	1.08302	0.614047	0.690621	0.834362	1.10525	1.22924	0.929242	1.88609	1.66754	1.58057	1.2147e-24	2.57873e-24
Bv6_148430_ecpe	blue	462.104	hypothetical protein BVRB_6g148430 [Beta vulgaris subsp. vulgaris]	GO:0003674(molecular_function);GO:0005634(nucleus);GO:0008150(biological_process)	NA	NA	NA	29.9725	21.8769	22.5857	26.9738	26.4132	31.189	32.6386	29.0035	33.9448	29.7035	25.0224	26.989	84.2621	71.1799	85.6609	1.53738e-80	7.87952e-80
Bv6_155740_wuuo	blue	462.032	PREDICTED: myb family transcription factor EFM [Beta vulgaris subsp. vulgaris]	GO:0003677(DNA binding);GO:0003700(DNA binding transcription factor activity);GO:0005634(nucleus);GO:0006351(transcription, DNA-templated);GO:0006355(regulation of transcription, DNA-templated)	04075(Plant hormone signal transduction)	K14491	NA	73.0002	67.7793	67.9393	58.5202	56.6816	55.7048	108.054	109.031	117.357	67.548	59.4066	68.6125	272.378	251.254	274.867	0	0
Bv9_214090_zdyg	blue	461.956	PREDICTED: ubiquitin-conjugating enzyme E2 28 [Beta vulgaris subsp. vulgaris]	GO:0004842(ubiquitin-protein transferase activity);GO:0005524(ATP binding);GO:0005737(cytoplasm);GO:0006511(ubiquitin-dependent protein catabolic process);GO:0016740(transferase activity);GO:0016925(protein sumoylation)	04141(Protein processing in endoplasmic reticulum);04120(Ubiquitin mediated proteolysis)	K06689	EC:2.3.2.23	13.2141	12.5913	13.1688	22.8003	19.701	19.0641	24.9817	24.5653	24.3151	36.647	32.662	33.765	40.1329	37.846	34.9611	2.14501e-54	7.88957e-54
Bv5_106060_emgz	blue	461.601	PREDICTED: acetylornithine deacetylase [Beta vulgaris subsp. vulgaris]	GO:0005615(extracellular space);GO:0006526(arginine biosynthetic process);GO:0008152(metabolic process);GO:0008270(zinc ion binding);GO:0008652(cellular amino acid biosynthetic process);GO:0008777(acetylornithine deacetylase activity);GO:0016787(hydrolase activity);GO:0043171(peptide catabolic process);GO:0045335(phagocytic vesicle);GO:0046872(metal ion binding);GO:0070573(metallodipeptidase acti…	00220(Arginine biosynthesis)	K01438	EC:3.5.1.16	25.5994	24.1571	26.2807	29.7887	34.3843	31.0106	53.6806	56.7234	55.3841	41.2203	40.9712	40.0796	58.909	56.7452	53.492	1.42924e-95	8.514e-95
Bv5_098630_eqfr	blue	461.508	PREDICTED: calcineurin B-like protein 7 isoform X1 [Beta vulgaris subsp. vulgaris]	GO:0004723(calcium-dependent protein serine/threonine phosphatase activity);GO:0005509(calcium ion binding);GO:0005513(detection of calcium ion);GO:0005515(protein binding);GO:0005634(nucleus);GO:0005737(cytoplasm);GO:0005886(plasma membrane);GO:0005955(calcineurin complex);GO:0030007(cellular potassium ion homeostasis);GO:0042539(hypotonic salinity response)	NA	NA	NA	2.49809	3.06983	2.86124	5.87728	5.64075	6.49739	13.5365	15.4998	15.1986	7.32756	6.74046	7.92984	15.4686	17.7412	15.7501	4.05589e-95	2.40402e-94
Bv7_172670_phws	blue	461.166	PREDICTED: transcription factor DIVARICATA [Beta vulgaris subsp. vulgaris]	GO:0009908(flower development);GO:0048262(determination of dorsal/ventral asymmetry)	NA	NA	NA	4.4881	6.5398	5.50392	9.45726	8.62512	9.76758	11.0848	11.7786	10.6961	8.92268	8.20083	8.21607	12.9987	12.0682	13.5791	2.33792e-19	4.31755e-19
Bv1_004350_wtoo	blue	460.89	PREDICTED: calmodulin-binding receptor-like cytoplasmic kinase 2 [Beta vulgaris subsp. vulgaris]	GO:0004674(protein serine/threonine kinase activity);GO:0005524(ATP binding);GO:0005634(nucleus);GO:0005737(cytoplasm);GO:0006468(protein phosphorylation);GO:0009555(pollen development);GO:0016301(kinase activity);GO:0046777(protein autophosphorylation)	NA	NA	NA	3.82527	3.30984	3.4322	8.83559	8.34216	8.26299	21.4713	19.839	18.8988	10.0778	10.3897	10.9309	21.0951	24.8866	19.8214	4.0553e-141	3.4905e-140
Bv1_021540_nmoe	blue	460.029	PREDICTED: scarecrow-like protein 1, partial [Beta vulgaris subsp. vulgaris]	GO:0003700(DNA binding transcription factor activity);GO:0005634(nucleus);GO:0006355(regulation of transcription, DNA-templated);GO:0043565(sequence-specific DNA binding)	NA	NA	NA	213.305	210.906	211.563	316.577	320.788	324.255	414.789	429.523	427.979	242.208	262.612	250.253	534.827	522.948	534.538	1.76419e-153	1.65673e-152
Bv6_136280_xwqa	blue	459.717	PREDICTED: folate synthesis bifunctional protein, mitochondrial [Beta vulgaris subsp. vulgaris]	GO:0000287(magnesium ion binding);GO:0003848(2-amino-4-hydroxy-6-hydroxymethyldihydropteridine diphosphokinase activity);GO:0004156(dihydropteroate synthase activity);GO:0005739(mitochondrion);GO:0046656(folic acid biosynthetic process)	00790(Folate biosynthesis)	K13941	EC:2.7.6.3;EC:2.5.1.15	12.233	10.0055	10.0171	12.6958	10.513	11.4207	12.5514	11.957	12.4777	19.3739	20.3966	18.8138	24.8835	31.6272	28.4002	4.12048e-33	1.05267e-32
Bv2_046940_htux	blue	459.519	PREDICTED: pentatricopeptide repeat-containing protein At5g15280 [Beta vulgaris subsp. vulgaris]	GO:0005739(mitochondrion);GO:0008150(biological_process);GO:0009451(RNA modification)	NA	NA	NA	2.96079	2.70235	2.69926	4.41	3.35855	4.53106	4.78833	4.8335	3.33747	3.35882	3.08591	4.11464	7.4597	6.93536	7.35792	6.5306e-14	1.0291e-13
Bv4_085810_guff	blue	459.367	PREDICTED: dol-P-Man:Man(6)GlcNAc(2)-PP-Dol alpha-1,2-mannosyltransferase [Beta vulgaris subsp. vulgaris]	GO:0000030(mannosyltransferase activity);GO:0005783(endoplasmic reticulum)	00510(N-Glycan biosynthesis)	K03846	EC:2.4.1.259;EC:2.4.1.261	12.7305	12.1522	13.4673	21.5675	21.5095	21.3589	20.5547	19.8891	18.7022	21.9868	24.9423	21.6573	28.5132	25.9106	27.5208	2.53988e-38	7.13717e-38
Bv_008110_nwgk	blue	459.233	PREDICTED: 1-aminocyclopropane-1-carboxylate oxidase 1 [Beta vulgaris subsp. vulgaris]	GO:0051213(dioxygenase activity)	00270(Cysteine and methionine metabolism)	K05933	EC:1.14.17.4	2.09312	2.22815	1.80443	21.5024	18.4919	21.3944	10.5872	10.9325	10.6593	19.8582	17.7946	18.7714	34.2004	30.5598	33.8885	0	0
Bv5_115590_dmwt	blue	458.913	PREDICTED: uncharacterized protein LOC104894143 [Beta vulgaris subsp. vulgaris]	NA	NA	NA	NA	0.214379	0.158044	0.111671	14.3061	14.6743	14.4759	17.3526	15.9888	18.4641	8.70296	8.17548	7.59905	24.5428	21.8867	23.5615	0	0
Bv4_084100_eume	blue	458.879	PREDICTED: defensin-like protein 1 isoform X1 [Beta vulgaris subsp. vulgaris]	GO:0005576(extracellular region);GO:0006952(defense response);GO:0031640(killing of cells of other organism);GO:0050832(defense response to fungus)	NA	NA	NA	3.15984	2.93012	2.97951	2.52292	1.88406	2.33531	3.49171	2.78555	3.2305	5.72846	5.63085	5.35219	8.91317	10.4725	9.38398	4.87855e-83	2.55421e-82
Bv3_056330_aduh	blue	458.424	PREDICTED: short-chain type dehydrogenase/reductase [Beta vulgaris subsp. vulgaris]	GO:0009507(chloroplast);GO:0016491(oxidoreductase activity);GO:0055114(oxidation-reduction process)	00061(Fatty acid biosynthesis);01040(Biosynthesis of unsaturated fatty acids);00780(Biotin metabolism);00333(Prodigiosin biosyntheses)	K00059	EC:1.1.1.100	8.6523	8.34162	9.10912	57.1439	62.894	61.0779	70.6669	72.3606	71.923	43.6927	45.1729	46.3473	86.6748	88.2386	85.4791	0	0
Bv5_118150_ruxd	blue	457.778	hypothetical protein BVRB_5g118150 [Beta vulgaris subsp. vulgaris]	NA	NA	NA	NA	1.80462	1.58256	1.92532	0.782298	0.618219	0.566128	2.4066	2.2639	2.05339	2.07994	2.53346	2.97031	6.24324	6.19227	6.72419	5.39726e-91	3.05501e-90
Bv8_183130_gfdt	blue	457.464	PREDICTED: uncharacterized protein LOC104900699 [Beta vulgaris subsp. vulgaris]	GO:0016021(integral component of membrane);GO:0016757(transferase activity, transferring glycosyl groups)	NA	NA	NA	209.216	201.895	197.393	133.211	120.039	135.114	118.543	111.211	110.516	149.953	162.315	168.172	79.9535	81.1113	82.9189	5.05769e-99	3.10848e-98
Bv3_057920_cenq	blue	457.082	PREDICTED: pentatricopeptide repeat-containing protein At3g46870-like [Beta vulgaris subsp. vulgaris]	GO:0003674(molecular_function);GO:0005634(nucleus);GO:0006810(transport);GO:0006810(transport)	00520(Amino sugar and nucleotide sugar metabolism);00520(Amino sugar and nucleotide sugar metabolism)	K01183	EC:3.2.1.14	2.27518	2.64076	1.91279	3.17395	2.15066	3.17864	4.14482	3.2484	3.84634	4.7963	3.58828	4.66705	6.01144	5.85853	5.02528	6.83785e-11	9.79069e-11
Bv8_195900_gnph	blue	456.971	PREDICTED: strigolactone esterase RMS3 [Beta vulgaris subsp. vulgaris]	GO:0016787(hydrolase activity)	NA	NA	NA	48.4823	47.0164	47.7168	101.809	104.023	92.4458	75.1814	73.5478	71.3418	99.8909	98.4567	96.2969	137.724	128.59	139.678	5.48998e-130	4.36873e-129
Bv4_081870_uxmo	blue	456.803	PREDICTED: probable serine/threonine-protein kinase WNK9 [Beta vulgaris subsp. vulgaris]	GO:0004674(protein serine/threonine kinase activity);GO:0005829(cytosol);GO:0006468(protein phosphorylation);GO:0035556(intracellular signal transduction)	NA	NA	NA	5.19781	5.26442	4.9278	13.8209	13.2012	13.5871	13.446	11.192	11.6271	12.766	12.0831	12.472	16.6248	16.7077	17.5147	2.75167e-106	1.79772e-105
Bv1_021660_ejwm	blue	456.605	PREDICTED: WAT1-related protein At3g02690, chloroplastic [Beta vulgaris subsp. vulgaris]	GO:0009507(chloroplast);GO:0016020(membrane);GO:0016021(integral component of membrane);GO:0031969(chloroplast membrane)	NA	NA	NA	2.37123	3.31136	2.76361	3.87427	4.31174	3.75876	7.1341	7.29866	6.00221	6.91928	6.96896	5.922	7.76935	7.55429	7.60658	8.72324e-30	2.08119e-29
Bv6_133820_oznf	blue	456.545	PREDICTED: artemisinic aldehyde Delta(11(13)) reductase [Beta vulgaris subsp. vulgaris]	GO:0003959(NADPH dehydrogenase activity);GO:0005777(peroxisome);GO:0009695(jasmonic acid biosynthetic process);GO:0016629(12-oxophytodienoate reductase activity);GO:0031408(oxylipin biosynthetic process)	00592(alpha-Linolenic acid metabolism)	K05894	EC:1.3.1.42	31.9016	31.4667	28.5439	35.4603	35.8957	36.3422	62.6952	63.2847	62.149	34.9753	38.9906	35.5553	73.2953	85.6621	85.0098	4.91176e-130	3.91025e-129
Bv2_041270_zhxk	blue	456.309	hypothetical protein BVRB_2g041270 [Beta vulgaris subsp. vulgaris]	GO:0005515(protein binding);GO:0005524(ATP binding);GO:0005576(extracellular region);GO:0006952(defense response);GO:0043531(ADP binding)	NA	NA	NA	1.92164	1.82381	2.35702	1.71094	2.54136	1.99249	3.80588	2.73276	2.82875	2.51786	3.79155	2.94631	5.28259	5.99886	4.87059	2.37809e-11	3.45668e-11
Bv2_034970_kyhj	blue	455.997	hypothetical protein BVRB_3g060640 [Beta vulgaris subsp. vulgaris]	GO:0000398(mRNA splicing, via spliceosome);GO:0003723(RNA binding);GO:0005681(spliceosomal complex);GO:0005737(cytoplasm);GO:0008380(RNA splicing);GO:0016607(nuclear speck);GO:0016607(nuclear speck)	03040(Spliceosome);03040(Spliceosome)	K12893	NA	3.897	3.40736	3.27015	12.5173	12.5587	12.5274	9.46802	9.23847	7.69641	7.4276	5.95429	6.85185	21.2107	19.1364	20.3222	4.01148e-125	3.07115e-124
Bv5_102500_ozdh	blue	455.961	PREDICTED: ABC transporter G family member 14 [Beta vulgaris subsp. vulgaris]	GO:0005886(plasma membrane);GO:0016021(integral component of membrane);GO:0042626(ATPase activity, coupled to transmembrane movement of substances)	02010(ABC transporters)	K05681	NA	8.25132	8.51603	8.66045	12.4084	12.1407	11.9019	8.02889	8.2957	8.0661	12.7201	13.1592	14.1836	24.8905	24.7319	25.1519	2.04634e-221	2.90482e-220
Bv5_114310_fqgf	blue	455.956	PREDICTED: 18.5 kDa class I heat shock protein [Beta vulgaris subsp. vulgaris]	GO:0005515(protein binding);GO:0005737(cytoplasm);GO:0006979(response to oxidative stress);GO:0009408(response to heat);GO:0043621(protein self-association)	04141(Protein processing in endoplasmic reticulum)	K13993	NA	5.47672	6.30587	6.47596	19.4451	22.1488	25.1519	43.0002	50.6415	55.9417	31.7725	24.4312	23.148	54.5216	49.743	59.9404	8.53438e-129	6.6959e-128
Bv9_213530_hqgr	blue	455.904	PREDICTED: hippocampus abundant transcript 1 protein [Beta vulgaris subsp. vulgaris]	GO:0005215(transporter activity);GO:0016021(integral component of membrane);GO:0055085(transmembrane transport)	NA	NA	NA	59.1025	62.7038	64.8633	33.534	26.5196	34.4216	102.042	102.143	92.8819	89.9438	86.2358	95.5048	158.235	160.939	165.579	1.4997e-174	1.61079e-173
Bv6_152760_fdhj	blue	455.814	hypothetical protein BVRB_6g152760 [Beta vulgaris subsp. vulgaris]	GO:0005524(ATP binding);GO:0006952(defense response);GO:0043531(ADP binding)	04626(Plant-pathogen interaction)	K13457	NA	94.9432	94.1904	95.908	72.092	71.183	71.6634	51.6868	49.3378	49.2189	22.8563	24.476	23.2628	19.6518	18.3741	19.1687	0	0
Bv6_138750_nrfp	blue	455.116	hypothetical protein BVRB_6g138750 [Beta vulgaris subsp. vulgaris]	GO:0004004(ATP-dependent RNA helicase activity);GO:0005634(nucleus);GO:0005737(cytoplasm);GO:0006396(RNA processing)	03040(Spliceosome)	K12818	EC:3.6.4.13	14.0279	12.9399	13.1305	22.8793	21.4284	21.5389	19.3659	22.3891	19.7507	16.0355	17.1041	16.2264	28.6306	30.1304	28.9461	5.05442e-56	1.91091e-55
Bv1_017510_akrj	blue	455.086	PREDICTED: fasciclin-like arabinogalactan protein 21 [Beta vulgaris subsp. vulgaris]	NA	NA	NA	NA	1.34442	1.32497	1.56842	3.65815	4.05568	4.02812	2.78418	2.79781	3.68756	1.88532	1.34726	1.63616	25.2129	25.5468	24.4643	0	0
Bv7_176650_cpao	blue	454.708	PREDICTED: phospholipase D alpha 4 [Beta vulgaris subsp. vulgaris]	GO:0004630(phospholipase D activity);GO:0005509(calcium ion binding);GO:0005886(plasma membrane);GO:0006970(response to osmotic stress);GO:0006995(cellular response to nitrogen starvation);GO:0009395(phospholipid catabolic process);GO:0009791(post-embryonic development);GO:0009825(multidimensional cell growth);GO:0016020(membrane);GO:0016036(cellular response to phosphate starvation);GO:0016042(l…	00564(Glycerophospholipid metabolism);00565(Ether lipid metabolism);04144(Endocytosis)	K01115	EC:3.1.4.4	7.64404	6.66628	6.75957	10.0869	7.92192	7.44764	10.8722	10.1466	9.09874	7.83304	7.20452	8.80384	14.7348	16.9347	17.8643	7.35005e-19	1.33694e-18
Bv3_054130_xpeq	blue	454.548	hypothetical protein BVRB_3g054130 [Beta vulgaris subsp. vulgaris]	NA	NA	NA	NA	1.34629	0.831569	1.08395	1.11428	1.29507	0.907395	2.36613	2.35321	2.33114	1.6386	2.07519	1.4621	3.50403	2.69893	3.70887	1.3138e-13	2.04852e-13
Bv3_059540_yriq	blue	454.531	PREDICTED: F-box/kelch-repeat protein At2g44130 [Beta vulgaris subsp. vulgaris]	GO:0005515(protein binding);GO:0005634(nucleus);GO:0005829(cytosol);GO:2000762(regulation of phenylpropanoid metabolic process)	NA	NA	NA	8.28493	7.91167	9.0848	5.51408	6.17793	7.04242	7.1458	8.10489	7.82816	11.292	10.8099	11.0295	30.5169	29.7226	29.8564	9.16096e-209	1.21245e-207
Bv2_035810_fdtk	blue	454.327	hypothetical protein BVRB_2g035810 [Beta vulgaris subsp. vulgaris]	NA	NA	NA	NA	0.516944	0.494183	0.237838	0.0001	0.0001	0.0001	2.9933	2.40565	2.62492	0.0001	0.0001	0.0311769	15.5502	17.5042	15.8352	0	0
Bv2_040110_zaig	blue	454.072	hypothetical protein BVRB_4g085550 [Beta vulgaris subsp. vulgaris]	NA	NA	NA	NA	4.9127	4.42247	5.47301	14.2478	13.3599	13.5802	12.3916	18.3488	16.5533	20.5469	20.1317	19.1763	22.0966	23.8144	22.9582	5.77754e-57	2.21967e-56
Bv9_206450_fzqu	blue	453.981	PREDICTED: uncharacterized protein LOC104903006 [Beta vulgaris subsp. vulgaris]	GO:0003674(molecular_function);GO:0008150(biological_process);GO:0016021(integral component of membrane)	NA	NA	NA	4.58253	4.64046	4.50591	7.62581	6.65071	9.023	9.78965	7.2169	8.40346	6.38218	5.59938	5.77889	12.9444	12.5412	15.0178	3.51131e-22	6.99644e-22
Bv5_104250_hkdf	blue	453.583	PREDICTED: granule-bound starch synthase 1, chloroplastic/amyloplastic [Beta vulgaris subsp. vulgaris]	GO:0004373(glycogen (starch) synthase activity);GO:0005515(protein binding);GO:0009011(starch synthase activity);GO:0009507(chloroplast);GO:0009569(chloroplast starch grain);GO:0016757(transferase activity, transferring glycosyl groups);GO:0019252(starch biosynthetic process);GO:0102502(ADP-glucose-starch glucosyltransferase activity)	00500(Starch and sucrose metabolism)	K13679	EC:2.4.1.242	10.9552	10.1625	11.5465	9.56835	11.406	9.45218	20.063	18.1053	17.0268	17.4488	15.0367	13.1994	23.2492	21.5206	21.8928	3.97825e-35	1.05614e-34
Bv4_077680_xrce	blue	453.356	PREDICTED: peroxidase 47 [Beta vulgaris subsp. vulgaris]	GO:0004601(peroxidase activity);GO:0009505(plant-type cell wall);GO:0009664(plant-type cell wall organization)	00940(Phenylpropanoid biosynthesis)	K00430	EC:1.11.1.7	15.6284	14.1701	14.6027	90.738	91.4642	91.0643	96.1553	92.9674	91.7461	62.2135	62.9075	65.5158	123.644	124.587	119.342	0	0
Bv9_215220_naos	blue	453.196	PREDICTED: uncharacterized protein LOC104904038 [Beta vulgaris subsp. vulgaris]	NA	NA	NA	NA	5.29668	6.84698	4.71515	7.37409	10.2625	10.4975	15.2139	11.4511	15.526	10.6566	8.86477	10.6051	16.4881	17.8459	16.2264	1.54695e-17	2.7152e-17
Bv8_195490_fzee	blue	453.158	PREDICTED: myb family transcription factor EFM [Beta vulgaris subsp. vulgaris]	GO:0003677(DNA binding);GO:0003700(DNA binding transcription factor activity);GO:0005515(protein binding);GO:0005634(nucleus);GO:0006351(transcription, DNA-templated);GO:0006355(regulation of transcription, DNA-templated);GO:0009266(response to temperature stimulus);GO:0009740(gibberellic acid mediated signaling pathway);GO:0009908(flower development);GO:0010452(histone H3-K36 methylation);GO:004…	04933(AGE-RAGE signaling pathway in diabetic complications)	K06236	NA	11.3016	9.50149	10.2368	17.9466	18.8106	20.2871	23.9345	27.0673	29.4136	17.5508	17.6894	19.0446	28.755	31.0987	28.4432	1.60642e-49	5.4717e-49
Bv2_042640_qucy	blue	453.115	hypothetical protein BVRB_2g042640 [Beta vulgaris subsp. vulgaris]	GO:0005515(protein binding);GO:0005524(ATP binding);GO:0005576(extracellular region);GO:0006952(defense response);GO:0043531(ADP binding)	NA	NA	NA	9.97525	9.21782	9.42347	7.14815	7.3442	8.76699	6.37193	5.26054	7.00538	4.03367	5.51964	5.6376	3.26382	4.05165	4.11296	1.41296e-12	2.13643e-12
Bv9_220930_gazw	blue	453.055	PREDICTED: UDP-glycosyltransferase 82A1 [Beta vulgaris subsp. vulgaris]	GO:0009813(flavonoid biosynthetic process);GO:0043231(intracellular membrane-bounded organelle);GO:0052696(flavonoid glucuronidation);GO:0080043(quercetin 3-O-glucosyltransferase activity);GO:0080044(quercetin 7-O-glucosyltransferase activity)	NA	NA	NA	45.8068	45.4608	44.8024	27.3421	23.3291	27.4553	14.6482	13.8771	15.3369	6.53191	7.63971	7.83056	3.32588	5.1037	3.44318	3.9284e-178	4.34229e-177
Bv6_153360_huwe	blue	452.84	PREDICTED: serine/threonine-protein kinase STY46 [Beta vulgaris subsp. vulgaris]	GO:0004672(protein kinase activity);GO:0004674(protein serine/threonine kinase activity);GO:0004712(protein serine/threonine/tyrosine kinase activity);GO:0005515(protein binding);GO:0005524(ATP binding);GO:0005634(nucleus);GO:0005737(cytoplasm);GO:0005829(cytosol);GO:0006468(protein phosphorylation);GO:0009734(auxin-activated signaling pathway);GO:0009742(brassinosteroid mediated signaling pathwa…	NA	NA	NA	735.172	740.78	715.65	499.985	472.68	478.787	383.185	373.228	371.137	539.471	539.976	536.022	336.482	307.601	337.506	2.82604e-120	2.08212e-119
Bv5_102170_nscu	blue	452.03	PREDICTED: rop guanine nucleotide exchange factor 14 [Beta vulgaris subsp. vulgaris]	GO:0005089(Rho guanyl-nucleotide exchange factor activity);GO:0005739(mitochondrion);GO:0005886(plasma membrane);GO:0080092(regulation of pollen tube growth)	NA	NA	NA	2.76895	3.51451	3.17277	2.87047	3.30125	3.12652	9.2907	9.20551	8.01022	8.16399	8.03401	7.67843	10.4202	10.1635	9.62317	5.20153e-91	2.94598e-90
Bv7_173370_hdix	blue	451.478	PREDICTED: L-type lectin-domain containing receptor kinase IV.1-like [Beta vulgaris subsp. vulgaris]	GO:0004674(protein serine/threonine kinase activity);GO:0005524(ATP binding);GO:0005886(plasma membrane);GO:0006468(protein phosphorylation);GO:0009751(response to salicylic acid);GO:0016021(integral component of membrane);GO:0016301(kinase activity);GO:0030246(carbohydrate binding)	NA	NA	NA	40.7219	37.2436	43.1843	21.4733	19.102	17.7958	23.0839	24.3261	24.1074	22.7266	20.7076	22.9587	12.0922	9.89892	9.78722	7.40986e-60	2.97445e-59
Bv4_078190_hzcx	blue	450.902	PREDICTED: NAC domain-containing protein 2 [Beta vulgaris subsp. vulgaris]	GO:0003677(DNA binding);GO:0005515(protein binding);GO:0005634(nucleus);GO:0006351(transcription, DNA-templated);GO:0007275(multicellular organism development);GO:0008361(regulation of cell size);GO:0009416(response to light stimulus);GO:0009611(response to wounding);GO:0009620(response to fungus);GO:0009744(response to sucrose);GO:0009751(response to salicylic acid);GO:0009753(response to jasmon…	NA	NA	NA	48.9507	46.5495	47.0005	133.271	133.403	133.803	124.984	116.773	118.818	114.899	109.469	111.35	163.529	159.953	161.543	2.29319e-159	2.25155e-158
Bv7_169160_kgrj	blue	450.727	hypothetical protein BVRB_7g169160 [Beta vulgaris subsp. vulgaris]	GO:0005634(nucleus);GO:0008150(biological_process);GO:0008483(transaminase activity)	NA	NA	NA	8.82272	6.69534	8.54919	9.67187	9.36479	8.72666	25.449	23.6706	22.2499	23.0907	23.1087	21.1969	29.9139	23.5797	29.8286	4.02003e-73	1.89886e-72
Bv4_089940_tmkj	blue	450.335	PREDICTED: scarecrow-like protein 21 [Beta vulgaris subsp. vulgaris]	GO:0003700(DNA binding transcription factor activity);GO:0005634(nucleus);GO:0006355(regulation of transcription, DNA-templated);GO:0043565(sequence-specific DNA binding)	NA	NA	NA	1007.61	974.964	1000.79	519.255	514.922	505.564	394.06	406.235	403.338	667.349	657.978	655.282	284.753	268.25	269.301	2.31847e-257	3.92877e-256
Bv1_009770_zfme	blue	450.334	PREDICTED: phytolongin Phyl1.1 [Beta vulgaris subsp. vulgaris]	GO:0000149(SNARE binding);GO:0005484(SNAP receptor activity);GO:0006887(exocytosis);GO:0006906(vesicle fusion);GO:0031201(SNARE complex)	NA	NA	NA	54.5397	55.6316	59.5801	37.9842	35.7353	36.1577	40.1968	39.6231	39.3981	36.8503	33.3439	37.489	27.7153	25.3312	27.5512	1.69902e-59	6.78002e-59
Bv6_142140_icux	blue	450.159	PREDICTED: ACD11 homolog protein [Beta vulgaris subsp. vulgaris]	GO:0005634(nucleus);GO:0005737(cytoplasm);GO:0120009(intermembrane lipid transfer);GO:0120013(intermembrane lipid transfer activity)	NA	NA	NA	36.5625	37.0033	32.2884	27.4918	25.8186	27.2482	25.0644	18.6695	20.6647	15.862	14.9193	15.3625	11.652	11.5204	14.217	1.12233e-42	3.4152e-42
Bv7_171750_jeye	blue	449.564	PREDICTED: (+)-neomenthol dehydrogenase-like [Beta vulgaris subsp. vulgaris]	GO:0031525(menthol biosynthetic process);GO:0042214(terpene metabolic process);GO:0052581((-)-isopiperitenone reductase activity);GO:0070402(NADPH binding)	00902(Monoterpenoid biosynthesis)	K15095	EC:1.1.1.208	3.38372	3.19802	2.78692	3.98422	4.17211	4.2348	3.61739	4.09867	2.57869	4.68812	5.38152	5.5573	7.7124	8.25372	7.6021	9.41274e-16	1.56816e-15
Bv7_158200_ynof	blue	449.527	hypothetical protein BVRB_7g158200 [Beta vulgaris subsp. vulgaris]	GO:0006952(defense response);GO:0009506(plasmodesma);GO:0046658(anchored component of plasma membrane)	NA	NA	NA	1074.91	1062.06	1234.29	668.228	675.696	719.782	509.308	650.71	691.679	799.085	760.92	776.677	441.891	415.706	438.898	5.04791e-51	1.75788e-50
Bv4_092340_smrf	blue	449.402	PREDICTED: calcium/calmodulin-regulated receptor-like kinase 1 [Beta vulgaris subsp. vulgaris]	GO:0005515(protein binding)	NA	NA	NA	76.6722	78.4195	78.3647	77.5163	74.5608	74.284	63.5293	64.6466	60.437	77.5569	80.886	79.1961	38.3007	36.4335	37.662	1.24932e-93	7.28442e-93
Bv5_123200_druz	blue	449.173	PREDICTED: small heat shock protein, chloroplastic isoform X2 [Beta vulgaris subsp. vulgaris]	GO:0003674(molecular_function);GO:0005739(mitochondrion);GO:0009408(response to heat);GO:0046686(response to cadmium ion)	04141(Protein processing in endoplasmic reticulum)	K13993	NA	20.9799	20.8433	22	38.7543	36.9251	39.3815	42.6658	44.8209	44.0012	18.5169	16.4224	16.408	124.112	123.611	125.007	0	0
Bv5_104750_qjgk	blue	448.621	PREDICTED: formin-like protein 1 [Beta vulgaris subsp. vulgaris]	GO:0005634(nucleus);GO:0016021(integral component of membrane)	NA	NA	NA	19.0618	19.152	22.0156	31.1972	31.3385	31.284	28.3265	28.1915	30.3756	24.8286	21.9168	23.1593	41.7121	41.1465	42.1359	3.27545e-54	1.20148e-53
Bv8_182100_hsoh	blue	448.57	PREDICTED: fructokinase-like 1, chloroplastic [Beta vulgaris subsp. vulgaris]	GO:0005515(protein binding);GO:0005634(nucleus);GO:0005737(cytoplasm);GO:0009295(nucleoid);GO:0009507(chloroplast);GO:0009658(chloroplast organization);GO:0016301(kinase activity);GO:0016310(phosphorylation);GO:0016773(phosphotransferase activity, alcohol group as acceptor);GO:0042644(chloroplast nucleoid);GO:0042793(plastid transcription);GO:0043621(protein self-association)	00051(Fructose and mannose metabolism);00500(Starch and sucrose metabolism);00520(Amino sugar and nucleotide sugar metabolism)	K00847	EC:2.7.1.4	4.45266	4.00634	5.23025	4.89042	4.69319	5.97409	7.83202	8.19134	9.77159	7.86179	7.73653	9.36461	10.1182	12.1443	9.96041	1.20753e-13	1.88546e-13
Bv6_155340_htwh	blue	448.52	PREDICTED: uncharacterized protein LOC104895357 [Beta vulgaris subsp. vulgaris]	GO:0005737(cytoplasm);GO:0008150(biological_process)	04016(MAPK signaling pathway - plant);04075(Plant hormone signal transduction)	K14498	EC:2.7.11.1	0.658147	0.944589	0.180134	0.0001	0.0001	0.0001	0.0001	0.0857409	0.0001	5.42542	5.14056	6.08228	12.7934	13.0632	12.5054	5.09907e-108	3.39443e-107
Bv_000090_zxxr	blue	448.097	PREDICTED: probable ATP-dependent helicase PF08_0048 [Beta vulgaris subsp. vulgaris]	NA	NA	NA	NA	9.25334	7.41099	8.35608	10.5889	10.6097	12.5204	9.38362	9.79685	10.6877	15.1944	15.0397	13.3987	19.4358	17.2265	18.9284	4.3155e-28	9.92172e-28
Bv9_203610_dkoq	blue	447.808	PREDICTED: ATP-dependent Clp protease adapter protein CLPS1, chloroplastic [Beta vulgaris subsp. vulgaris]	NA	NA	NA	NA	5.496	5.2591	5.56551	4.21588	7.73207	7.70348	6.52218	7.76834	6.17829	8.40027	6.94604	6.66723	15.566	18.7028	15.328	6.97249e-18	1.23466e-17
Bv6_154340_ouza	blue	447.757	PREDICTED: uncharacterized protein LOC104897951 [Beta vulgaris subsp. vulgaris]	GO:0009507(chloroplast);GO:0009534(chloroplast thylakoid);GO:0009535(chloroplast thylakoid membrane);GO:0016020(membrane);GO:0016021(integral component of membrane)	NA	NA	NA	4.50531	4.96344	5.91792	9.32168	6.47069	9.40765	6.77507	8.36995	11.3422	11.626	10.5241	11.4899	13.9958	14.4065	15.9111	7.77584e-17	1.33821e-16
Bv5_123000_paor	blue	447.571	PREDICTED: uncharacterized protein LOC109136527 [Beta vulgaris subsp. vulgaris]	GO:0005634(nucleus);GO:0008150(biological_process)	NA	NA	NA	4.60429	5.68931	5.68664	6.11975	5.50707	4.52907	8.15993	6.51379	6.88325	9.53702	9.97792	11.9317	13.6424	13.1297	12.754	6.34828e-32	1.58276e-31
Bv3_063990_goti	blue	447.459	hypothetical protein BVRB_3g063990 [Beta vulgaris subsp. vulgaris]	GO:0005515(protein binding);GO:0005524(ATP binding);GO:0005634(nucleus);GO:0006952(defense response);GO:0043531(ADP binding)	NA	NA	NA	3.58179	3.08733	2.93305	2.44582	2.66626	2.14175	13.8744	13.4693	12.5909	7.93886	9.79939	9.50496	15.2732	14.4058	16.0371	2.18925e-175	2.36213e-174
Bv4_083470_nphg	blue	447.344	hypothetical protein BVRB_4g083470 [Beta vulgaris subsp. vulgaris]	NA	00910(Nitrogen metabolism)	K01673	EC:4.2.1.1	0.339691	0.422514	0.462702	0.594492	0.769217	0.764037	1.03748	1.41031	1.19422	0.59328	0.685339	0.537884	1.56611	1.72768	1.58199	6.72219e-22	1.32972e-21
Bv9_220421z3329	blue	447.307	PREDICTED: glycine-rich cell wall structural protein 2-like [Beta vulgaris subsp. vulgaris]	NA	NA	NA	NA	0.691241	0.780771	1.2992	0.893235	1.06732	0.986677	3.54228	3.17711	2.61682	8.05553	10.3213	6.23249	11.533	13.32	11.4875	8.58304e-66	3.72167e-65
Bv6_127470_ijaz	blue	447	PREDICTED: putative oxidoreductase TDA3 [Beta vulgaris subsp. vulgaris]	GO:0005575(cellular_component);GO:0016491(oxidoreductase activity);GO:0055114(oxidation-reduction process)	NA	NA	NA	7.05067	6.90883	7.84239	15.0227	13.9458	14.596	14.8741	15.3778	13.4887	13.3233	10.648	11.671	17.3187	18.5893	19.6174	1.1331e-44	3.56223e-44
Bv1_011760_gtwy	blue	446.551	PREDICTED: protein SET DOMAIN GROUP 41 isoform X1 [Beta vulgaris subsp. vulgaris]	GO:0005634(nucleus);GO:0008168(methyltransferase activity);GO:0032259(methylation)	NA	NA	NA	1.79794	2.61627	2.14057	4.10547	2.77284	4.55569	3.49826	4.01853	3.70803	4.06709	3.7216	4.40029	5.75219	5.3986	6.29596	1.09987e-12	1.66848e-12
Bv7_169490_drkt	blue	446.292	PREDICTED: 17.4 kDa class III heat shock protein [Beta vulgaris subsp. vulgaris]	GO:0003674(molecular_function);GO:0005737(cytoplasm);GO:0009408(response to heat);GO:0009644(response to high light intensity);GO:0042542(response to hydrogen peroxide)	04141(Protein processing in endoplasmic reticulum)	K13993	NA	5.19397	7.11863	7.8236	36.3142	31.9503	31.3629	21.2714	22.5632	23.3311	25.4635	20.8614	23.9843	46.3342	42.8129	44.7663	4.87989e-108	3.25081e-107
Bv5_113640_rctw	blue	445.916	PREDICTED: uncharacterized protein LOC104893960 [Beta vulgaris subsp. vulgaris]	NA	NA	NA	NA	0.715238	0.691008	0.533846	1.45529	1.256	1.43228	2.60975	0.934881	1.84064	2.90773	1.57533	2.32972	4.16849	3.44043	5.1506	3.989e-14	6.32263e-14
Bv5_106860_gnjp	blue	445.813	hypothetical protein BVRB_5g106860 [Beta vulgaris subsp. vulgaris]	GO:0003677(DNA binding);GO:0003682(chromatin binding);GO:0003886(DNA (cytosine-5-)-methyltransferase activity);GO:0005634(nucleus);GO:0006306(DNA methylation);GO:0006351(transcription, DNA-templated);GO:0006355(regulation of transcription, DNA-templated);GO:0010426(DNA methylation on cytosine within a CHH sequence);GO:0016569(covalent chromatin modification);GO:0034605(cellular response to heat);…	00270(Cysteine and methionine metabolism)	K00558	EC:2.1.1.37	0.0001	0.104639	0.0001	0.588052	0.519551	0.422034	0.383923	0.0001	0.130207	0.57559	0.485007	0.535469	2.91428	3.77603	2.64871	7.22983e-17	1.24582e-16
Bv8_183710_ukrh	blue	445.738	PREDICTED: dof zinc finger protein DOF1.4 [Beta vulgaris subsp. vulgaris]	GO:0003677(DNA binding);GO:0003700(DNA binding transcription factor activity);GO:0005634(nucleus);GO:0006351(transcription, DNA-templated);GO:0006355(regulation of transcription, DNA-templated);GO:0044212(transcription regulatory region DNA binding);GO:0046872(metal ion binding);GO:0048364(root development)	NA	NA	NA	63.05	66.7468	63.2891	53.0137	53.4824	60.189	32.6796	34.283	38.2509	50.7428	57.159	49.8315	29.8854	30.7709	32.9019	2.26269e-53	8.19376e-53
Bv5_110320_inqt	blue	445.738	PREDICTED: SNF1-related protein kinase regulatory subunit gamma-1 [Beta vulgaris subsp. vulgaris]	GO:0003824(catalytic activity);GO:0005524(ATP binding);GO:0005975(carbohydrate metabolic process);GO:0006633(fatty acid biosynthetic process);GO:0009505(plant-type cell wall);GO:0019887(protein kinase regulator activity);GO:0042128(nitrate assimilation)	NA	NA	NA	101.209	99.7593	108.433	176.112	188.592	173.678	135.299	146.984	136.06	122.394	118.869	125.993	284.873	286.128	281.494	1.09003e-149	9.95076e-149
Bv3_054500_giht	blue	445.655	PREDICTED: receptor protein kinase CLAVATA1 [Beta vulgaris subsp. vulgaris]	GO:0000325(plant-type vacuole);GO:0004674(protein serine/threonine kinase activity);GO:0005515(protein binding);GO:0005524(ATP binding);GO:0005886(plasma membrane);GO:0006468(protein phosphorylation);GO:0007169(transmembrane receptor protein tyrosine kinase signaling pathway);GO:0007172(signal complex assembly);GO:0009506(plasmodesma);GO:0009934(regulation of meristem structural organization);GO:…	NA	NA	NA	5.37313	5.55183	4.92655	2.01581	2.51168	1.87974	12.3409	12.3774	11.0343	9.73148	9.83845	9.78447	17.6719	16.3828	16.7542	4.31966e-176	4.69546e-175
Bv_016710_yihc	blue	445.498	hypothetical protein BVRB_016710, partial [Beta vulgaris subsp. vulgaris]	GO:0005739(mitochondrion);GO:0005777(peroxisome);GO:0019605(butyrate metabolic process);GO:0047760(butyrate-CoA ligase activity)	NA	NA	NA	5.25553	3.96649	4.67482	1.28311	0.950036	1.18766	6.42157	7.51644	6.39844	7.80017	8.57148	6.84855	15.4354	15.2005	15.2006	4.58698e-73	2.16612e-72
Bv8_198130_trfx	blue	444.749	PREDICTED: uncharacterized protein LOC104902365 [Beta vulgaris subsp. vulgaris]	GO:0004497(monooxygenase activity);GO:0005634(nucleus);GO:0008150(biological_process)	NA	NA	NA	19.9588	21.0365	22.558	32.8823	32.2048	37.0553	30.3429	31.0219	29.5977	23.3356	23.0358	22.0164	59.5952	59.377	55.2253	3.83946e-93	2.2291e-92
Bv5_119450_qjrg	blue	444.682	PREDICTED: GATA zinc finger domain-containing protein 14 [Beta vulgaris subsp. vulgaris]	GO:0003674(molecular_function);GO:0005634(nucleus)	NA	NA	NA	23.2109	21.5683	24.9486	59.4054	54.259	60.4613	63.3901	69.7791	75.9017	45.8378	43.8649	50.2895	84.6796	77.2094	81.9861	1.74301e-112	1.20953e-111
Bv9_213510_gqha	blue	444.491	PREDICTED: protein DJ-1 homolog C [Beta vulgaris subsp. vulgaris]	GO:0003713(transcription coactivator activity);GO:0005634(nucleus);GO:0005739(mitochondrion);GO:0005829(cytosol);GO:0006357(regulation of transcription by RNA polymerase II);GO:0019172(glyoxalase III activity);GO:0019243(methylglyoxal catabolic process to D-lactate via S-lactoyl-glutathione);GO:0070301(cellular response to hydrogen peroxide)	NA	NA	NA	3.40898	2.60168	3.32013	5.35042	6.31656	4.99261	8.56327	7.78186	6.68637	8.48166	7.97401	9.34241	11.3835	8.50204	10.2834	1.49801e-19	2.78323e-19
Bv3_064750_iehr	blue	443.734	PREDICTED: putative pentatricopeptide repeat-containing protein At3g47840 [Beta vulgaris subsp. vulgaris]	GO:0005739(mitochondrion);GO:0008150(biological_process);GO:0043231(intracellular membrane-bounded organelle)	00240(Pyrimidine metabolism)	K13800	EC:2.7.4.14	0.925801	1.04369	0.580886	1.44966	1.59687	1.4783	1.58821	1.93686	1.44726	1.88265	2.13746	1.84138	2.48872	2.51182	2.12958	5.80074e-09	7.78807e-09
Bv_016000_frag	blue	443.568	hypothetical protein BVRB_016000 [Beta vulgaris subsp. vulgaris]	GO:0005634(nucleus);GO:0006355(regulation of transcription, DNA-templated)	NA	NA	NA	0.0323847	0.0288095	0.0516329	0.353817	0.249511	0.329493	0.265426	0.347274	0.34326	0.878909	0.574142	0.824907	1.17865	1.03894	1.73098	1.97577e-24	4.17109e-24
Bv6_133210_uykq	blue	443.288	PREDICTED: RING-H2 finger protein ATL78 [Beta vulgaris subsp. vulgaris]	GO:0008270(zinc ion binding);GO:0016021(integral component of membrane);GO:0016567(protein ubiquitination);GO:0046872(metal ion binding)	NA	NA	NA	5.86299	5.77302	5.41313	3.82622	3.94649	5.27158	14.9733	14.2721	14.4535	9.15206	9.84	11.1261	16.3305	18.749	17.4191	3.96029e-89	2.21196e-88
Bv7_179180_rkjz	blue	443.211	PREDICTED: alpha carbonic anhydrase 7 [Beta vulgaris subsp. vulgaris]	GO:0004089(carbonate dehydratase activity);GO:0006730(one-carbon metabolic process);GO:0008270(zinc ion binding);GO:0009507(chloroplast);GO:0009570(chloroplast stroma)	00910(Nitrogen metabolism)	K01674	EC:4.2.1.1	146.486	130.398	137.855	81.3251	83.9804	87.3195	86.2528	81.6465	85.6299	29.7766	31.0759	30.3425	13.3882	15.4385	14.8808	0	0
Bv1_013770_txks	blue	443.135	PREDICTED: uncharacterized protein LOC104899283 [Beta vulgaris subsp. vulgaris]	GO:0005737(cytoplasm)	NA	NA	NA	1.01415	1.13556	0.583665	1.05757	1.4445	1.39755	14.5415	15.4284	15.5026	14.2841	14.6034	14.7406	17.8404	18.7922	17.4431	0	0
Bv7_157730_wzhn	blue	442.355	PREDICTED: lysM domain receptor-like kinase 3 isoform X2 [Beta vulgaris subsp. vulgaris]	GO:0005515(protein binding);GO:0005775(vacuolar lumen);GO:0005886(plasma membrane);GO:0009609(response to symbiotic bacterium);GO:0009877(nodulation);GO:0016301(kinase activity);GO:0046777(protein autophosphorylation)	04626(Plant-pathogen interaction)	K13429	NA	87.1804	90.3375	84.7899	83.8642	82.8637	80.879	61.942	54.5494	57.1395	41.1302	44.9971	42.1214	38.5137	37.259	37.9598	7.37411e-105	4.77331e-104
Bv8_196070_ppwp	blue	442.303	hypothetical protein BVRB_8g196070 [Beta vulgaris subsp. vulgaris]	GO:0005086(ARF guanyl-nucleotide exchange factor activity);GO:0005802(trans-Golgi network);GO:0016192(vesicle-mediated transport)	04144(Endocytosis)	K18443	NA	2.11475	2.504	2.52483	2.04502	2.01711	1.80537	5.266	6.4167	4.41039	4.5772	6.08978	4.7265	6.73792	7.93188	7.73674	5.93918e-22	1.17649e-21
Bv_035210_kwws	blue	442.265	hypothetical protein CTI12_AA261530 (chloroplast) [Artemisia annua]	NA	NA	NA	NA	0.196009	1.79361	0.124888	0.351078	0.495877	0.583105	2.04195	1.0979	2.19733	1.41567	1.41761	1.15426	5.40894	6.76011	7.6051	6.28024e-12	9.29813e-12
Bv4_090820_hfai	blue	442.133	PREDICTED: coiled-coil domain-containing protein 22 homolog [Beta vulgaris subsp. vulgaris]	GO:0097602(cullin family protein binding);GO:2000060(positive regulation of ubiquitin-dependent protein catabolic process);GO:2000060(positive regulation of ubiquitin-dependent protein catabolic process)	NA	NA	NA	14.8993	17.0207	18.0254	27.9277	31.0349	28.9082	32.8199	34.0769	34.2891	25.216	24.9631	21.6148	38.7443	40.6878	37.9921	1.59857e-46	5.18354e-46
Bv5_121630_wrwg	blue	442.111	PREDICTED: probable beta-D-xylosidase 2 [Beta vulgaris subsp. vulgaris]	GO:0009044(xylan 1,4-beta-xylosidase activity);GO:0009505(plant-type cell wall);GO:0031222(arabinan catabolic process);GO:0045493(xylan catabolic process);GO:0046556(alpha-L-arabinofuranosidase activity)	00520(Amino sugar and nucleotide sugar metabolism)	K15920	EC:3.2.1.37	19.12	18.2713	18.5709	12.3418	14.5533	13.7694	36.1624	35.9085	36.3569	18.9774	19.9659	21.02	54.1561	56.3322	56.6302	9.49717e-277	1.76539e-275
Bv4_072140_wcty	blue	441.149	PREDICTED: lysine-specific demethylase JMJ30 [Beta vulgaris subsp. vulgaris]	GO:0003700(DNA binding transcription factor activity);GO:0005515(protein binding);GO:0005634(nucleus);GO:0005737(cytoplasm);GO:0007623(circadian rhythm);GO:0009908(flower development);GO:0042752(regulation of circadian rhythm);GO:0046872(metal ion binding);GO:0046975(histone methyltransferase activity (H3-K36 specific));GO:0051213(dioxygenase activity);GO:0055114(oxidation-reduction process);GO:0…	NA	NA	NA	17.1863	18.6791	19.9112	58.4471	60.2545	58.1138	33.2047	29.9305	30.4274	37.481	36.2057	33.9641	101.484	105.043	101.799	0	0
Bv6_148720_sqho	blue	440.807	hypothetical protein BVRB_6g148720 isoform A [Beta vulgaris subsp. vulgaris]	GO:0000793(condensed chromosome);GO:0003918(DNA topoisomerase type II (ATP-hydrolyzing) activity);GO:0005515(protein binding);GO:0007131(reciprocal meiotic recombination);GO:0009507(chloroplast);GO:0030674(protein binding, bridging);GO:0042138(meiotic DNA double-strand break formation);GO:0048235(pollen sperm cell differentiation);GO:0048314(embryo sac morphogenesis);GO:0048314(embryo sac morphog…	NA	NA	NA	0.608546	0.639142	0.72454	0.973133	0.761889	0.772047	0.992226	0.765449	1.01001	1.17468	1.33826	1.1242	2.12273	1.54497	1.56629	8.43197e-10	1.16428e-09
Bv5_097990_fpfn	blue	440.203	PREDICTED: NAC domain-containing protein 7 isoform X1 [Beta vulgaris subsp. vulgaris];PREDICTED: NAC domain-containing protein 7 isoform X2 [Beta vulgaris subsp. vulgaris]	GO:0003677(DNA binding);GO:0003700(DNA binding transcription factor activity);GO:0005515(protein binding);GO:0005634(nucleus);GO:0006351(transcription, DNA-templated);GO:0006355(regulation of transcription, DNA-templated);GO:0007275(multicellular organism development);GO:0009793(embryo development ending in seed dormancy);GO:0048759(xylem vessel member cell differentiation);GO:0071555(cell wall o…	03013(RNA transport);03015(mRNA surveillance pathway);03018(RNA degradation);03018(RNA degradation)	K13126	NA	3.2794	2.7123	2.39203	3.31118	2.38573	3.73669	7.11047	8.28762	7.79073	4.94262	5.3635	5.12636	8.48701	8.93178	7.98881	4.36965e-25	9.36234e-25
Bv7_156780_jipr	blue	439.951	PREDICTED: serine/threonine-protein kinase AtPK2/AtPK19 [Beta vulgaris subsp. vulgaris]	GO:0004674(protein serine/threonine kinase activity);GO:0005634(nucleus);GO:0005737(cytoplasm);GO:0035556(intracellular signal transduction)	NA	NA	NA	21.5837	20.6605	21.0921	38.1457	38.7451	38.4532	35.2605	34.7579	34.661	41.5848	41.4136	41.3811	46.5568	48.413	47.3918	6.64564e-93	3.84536e-92
Bv6_140110_asga	blue	439.869	PREDICTED: jasmonate-induced protein homolog [Beta vulgaris subsp. vulgaris]	NA	NA	NA	NA	34.8845	36.8603	34.3156	25.5276	21.1115	25.0131	50.8054	40.3104	45.7792	43.7727	39.7369	42.6677	75.3325	72.0581	81.2546	1.89133e-84	1.00435e-83
Bv5_111130_ydnh	blue	439.859	hypothetical protein BVRB_029830, partial [Beta vulgaris subsp. vulgaris]	GO:0000978(RNA polymerase II proximal promoter sequence-specific DNA binding);GO:0005634(nucleus)	NA	NA	NA	0.5701	0.71096	0.571054	1.01234	0.69886	0.769234	1.40541	1.17522	1.39785	1.23393	1.32619	1.14127	1.55437	1.89875	1.40772	9.61961e-09	1.28192e-08
Bv4_079560_oyxq	blue	439.645	PREDICTED: PLASMODESMATA CALLOSE-BINDING PROTEIN 4 [Beta vulgaris subsp. vulgaris]	GO:0004553(hydrolase activity, hydrolyzing O-glycosyl compounds);GO:0030247(polysaccharide binding);GO:0046658(anchored component of plasma membrane)	00230(Purine metabolism);00240(Pyrimidine metabolism);03020(RNA polymerase)	K03006	EC:2.7.7.6	34.1038	32.0211	41.7278	73.5446	74.2575	80.2587	62.4665	72.7508	83.0857	43.3661	41.9082	41.0828	135.516	130.437	139.131	3.24272e-109	2.18239e-108
Bv6_153630_fukg	blue	439.487	PREDICTED: glycine-rich RNA-binding protein 4, mitochondrial isoform X3 [Beta vulgaris subsp. vulgaris]	GO:0003723(RNA binding);GO:0005515(protein binding);GO:0006397(mRNA processing);GO:0009507(chloroplast);GO:0016554(cytidine to uridine editing);GO:1900871(chloroplast mRNA modification)	NA	NA	NA	4.57442	3.92007	3.59918	5.05102	6.97606	5.41478	5.5633	5.71038	5.81773	6.49113	5.76804	6.11169	8.516	8.46596	7.34503	8.25247e-07	1.02994e-06
Bv7_173470_fxer	blue	438.521	PREDICTED: transcription factor BOA [Beta vulgaris subsp. vulgaris]	GO:0003677(DNA binding);GO:0003700(DNA binding transcription factor activity);GO:0005634(nucleus);GO:0006351(transcription, DNA-templated);GO:0006355(regulation of transcription, DNA-templated);GO:0007623(circadian rhythm);GO:0009909(regulation of flower development)	00061(Fatty acid biosynthesis);01040(Biosynthesis of unsaturated fatty acids)	K03921	EC:1.14.19.2;EC:1.14.19.11	7.26816	7.97955	8.16126	32.0598	30.0146	31.6895	18.9022	21.3541	19.2891	18.876	19.7005	19.13	46.903	42.5048	41.6319	1.55389e-183	1.77552e-182
Bv1_021970_yuak	blue	438.381	PREDICTED: BRASSINOSTEROID INSENSITIVE 1-associated receptor kinase 1 [Beta vulgaris subsp. vulgaris]	GO:0004675(transmembrane receptor protein serine/threonine kinase activity);GO:0004714(transmembrane receptor protein tyrosine kinase activity);GO:0004725(protein tyrosine phosphatase activity);GO:0005515(protein binding);GO:0005524(ATP binding);GO:0005789(endoplasmic reticulum membrane);GO:0005886(plasma membrane);GO:0006468(protein phosphorylation);GO:0007030(Golgi organization);GO:0009556(micr…	04016(MAPK signaling pathway - plant);04075(Plant hormone signal transduction);04626(Plant-pathogen interaction)	K13416	EC:2.7.10.1;EC:2.7.11.1	11.4548	10.3296	11.371	6.06603	6.26535	6.54551	4.19864	4.36886	3.96289	6.96793	6.61038	6.24898	3.31911	3.7362	3.48953	7.83355e-73	3.68732e-72
Bv8_187100_jjtx	blue	438.248	hypothetical protein BVRB_8g187100 [Beta vulgaris subsp. vulgaris]	GO:0004674(protein serine/threonine kinase activity);GO:0005886(plasma membrane);GO:0006468(protein phosphorylation);GO:0006952(defense response);GO:0009506(plasmodesma)	NA	NA	NA	31.2422	30.5233	33.768	32.3197	29.605	32.2621	70.3091	72.1882	70.5102	45.2953	44.6191	48.254	75.7021	78.2522	77.9852	9.74266e-161	9.64559e-160
Bv5_119140_uami	blue	438.068	PREDICTED: probable plastid-lipid-associated protein 10, chloroplastic [Beta vulgaris subsp. vulgaris]	GO:0008150(biological_process);GO:0009507(chloroplast);GO:0010287(plastoglobule)	NA	NA	NA	2.58161	2.82142	1.17226	3.16213	3.73196	4.66027	4.6925	4.46719	4.57709	3.73414	4.12082	4.68794	6.95506	5.54608	7.73496	8.5379e-08	1.10277e-07
Bv2_039350_dzzs	blue	437.828	PREDICTED: myosin-binding protein 2 isoform X1 [Beta vulgaris subsp. vulgaris]	GO:0005737(cytoplasm);GO:0008150(biological_process);GO:0016021(integral component of membrane);GO:0017022(myosin binding);GO:0030133(transport vesicle)	NA	NA	NA	0.830561	0.948436	1.44764	1.423	1.504	1.41253	1.63314	1.17801	1.05696	1.68803	1.83456	2.10441	3.16732	2.66412	3.1636	3.78761e-10	5.29345e-10
Bv7_174540_ksge	blue	437.148	PREDICTED: transcription factor MYB59 isoform X1 [Beta vulgaris subsp. vulgaris];PREDICTED: transcription factor MYB59 isoform X2 [Beta vulgaris subsp. vulgaris]	GO:0000981(RNA polymerase II transcription factor activity, sequence-specific DNA binding);GO:0001135(transcription factor activity, RNA polymerase II transcription factor recruiting);GO:0003677(DNA binding);GO:0003700(DNA binding transcription factor activity);GO:0005634(nucleus);GO:0006351(transcription, DNA-templated);GO:0006355(regulation of transcription, DNA-templated);GO:0006357(regulation…	NA	NA	NA	76.338	83.0845	69.0345	84.9989	84.3383	78.4142	111.532	104.193	110.218	66.6979	59.953	61.0891	307.59	281.112	295.571	1.76981e-285	3.42049e-284
Bv3_061650_mpup	blue	437.108	PREDICTED: thioredoxin reductase NTRC [Beta vulgaris subsp. vulgaris]	GO:0004791(thioredoxin-disulfide reductase activity);GO:0005515(protein binding);GO:0009507(chloroplast);GO:0016671(oxidoreductase activity, acting on a sulfur group of donors, disulfide as acceptor);GO:0042744(hydrogen peroxide catabolic process);GO:0042802(identical protein binding)	00450(Selenocompound metabolism)	K00384	EC:1.8.1.9	10.2094	9.00493	10.5825	12.4378	13.5771	12.453	15.5425	16.2309	13.8877	21.0178	21.6691	18.8808	24.3955	20.4207	23.1916	3.61887e-30	8.69951e-30
Bv1_017310_hdne	blue	437.087	PREDICTED: obtusifoliol 14-alpha demethylase [Beta vulgaris subsp. vulgaris]	GO:0005783(endoplasmic reticulum);GO:0005886(plasma membrane);GO:0008398(sterol 14-demethylase activity);GO:0016126(sterol biosynthetic process)	00100(Steroid biosynthesis)	K05917	EC:1.14.13.70	85.8924	81.8683	87.4068	313.165	322.208	310.857	246.935	267.419	256.711	394.939	400.455	389.178	475.636	474.56	469.996	0	0
Bv2_023420_cngu	blue	437.087	PREDICTED: probable acetyltransferase NATA1-like [Beta vulgaris subsp. vulgaris]	GO:0005737(cytoplasm);GO:0006591(ornithine metabolic process);GO:0008080(N-acetyltransferase activity);GO:0009507(chloroplast)	NA	NA	NA	3.50546	4.64284	3.20724	2.75784	4.1013	3.68249	2.76499	3.33654	2.7221	6.96112	7.05808	7.39266	15.6675	17.1317	18.6031	4.17843e-62	1.72772e-61
Bv5_120520_pqwn	blue	436.947	hypothetical protein BVRB_5g120520 [Beta vulgaris subsp. vulgaris]	NA	NA	NA	NA	3.99636	3.60398	3.92998	4.67651	4.15997	4.12967	4.4626	4.24689	3.70381	4.11196	4.71402	5.66408	8.01459	7.31991	8.73613	1.16791e-15	1.94011e-15
Bv8_199481z2949	blue	436.911	PREDICTED: uncharacterized protein LOC104887415 [Beta vulgaris subsp. vulgaris]	NA	NA	NA	NA	2.80812	4.30917	3.54711	33.7101	43.0625	43.3077	41.4847	37.857	39.7264	28.4635	26.9183	29.3447	51.2493	54.6573	58.0133	3.16171e-145	2.7742e-144
Bv3_066590_ignp	blue	436.747	PREDICTED: dehydration-responsive element-binding protein 1D [Beta vulgaris subsp. vulgaris]	GO:0003677(DNA binding);GO:0003700(DNA binding transcription factor activity);GO:0005634(nucleus);GO:0006351(transcription, DNA-templated);GO:0006355(regulation of transcription, DNA-templated);GO:0009738(abscisic acid-activated signaling pathway);GO:0019760(glucosinolate metabolic process);GO:0043565(sequence-specific DNA binding)	NA	NA	NA	3.90011	4.65947	4.3609	13.7329	13.2714	14.2673	18.6682	18.6257	18.6974	22.5059	19.3805	20.4051	23.9924	21.1421	22.7096	1.54715e-225	2.25006e-224
Bv4_095780_ozhh	blue	435.432	PREDICTED: uncharacterized protein LOC104907569 [Beta vulgaris subsp. vulgaris]	GO:0003674(molecular_function);GO:0005576(extracellular region);GO:0005886(plasma membrane);GO:0008150(biological_process);GO:0016021(integral component of membrane)	NA	NA	NA	5.40518	4.09512	4.86716	3.16259	2.89475	2.58258	6.66514	7.79686	7.0416	9.26956	9.52021	8.5773	13.132	13.2919	11.4421	8.34229e-74	3.9751e-73
Bv6_129910_cmip	blue	435.29	PREDICTED: NAC domain-containing protein 37 [Beta vulgaris subsp. vulgaris]	GO:0003677(DNA binding);GO:0003700(DNA binding transcription factor activity);GO:0005515(protein binding);GO:0005634(nucleus);GO:0006351(transcription, DNA-templated);GO:0006355(regulation of transcription, DNA-templated);GO:0007275(multicellular organism development);GO:0010200(response to chitin);GO:0043565(sequence-specific DNA binding);GO:0044212(transcription regulatory region DNA binding);G…	03013(RNA transport);03015(mRNA surveillance pathway);03018(RNA degradation)	K13126	NA	4.08732	2.8947	3.83161	4.51115	2.41428	3.56021	6.49134	6.18788	6.18613	8.08761	7.41916	7.52657	9.49778	8.20805	9.75944	5.54342e-13	8.49209e-13
[truncated: 7,804 more rows]
