# Supplementary material for: Transcriptome and Metabolome Analyses Revealed the Response Mechanism of Sugar Beet to Salt Stress of Different Durations
Source: Int J Mol Sci. 2022 Aug 24;23(17):9599. doi: 10.3390/ijms23179599 (PMC9455719; doi:10.3390/ijms23179599)
Supplement: Supplementary file 1 [file ijms-23-09599-s001.zip › Table S4 Details information of differentially accumulated metabolites (DAMs) in leaves under salt-stress.xlsx]

## Sheet: Sheet1
Table S6 Details information of differentially accumulated metabolites (DAMs) in leaves under salt-stress
Metabolite	Formula	Superclass	Class	MS2.HMDB	MS2.KEGG	adduct.ion	MZ	RT	VIP	ratio	q-value	Type
Reserpine	C33H40N2O9	Alkaloids and derivatives	Yohimbine alkaloids	HMDB0014351	C06539	[M+H]+	609.267	8.01228	2.26051	5.90197	0.0021645	up
Hirsuteine	C22H26N2O3	Alkaloids and derivatives	-	NA	NA	[M+H]+	367.208	3.83523	2.02267	3.5691	0.0021645	up
Epinephrine	C9H13NO3	Benzenoids	Phenols	HMDB0000068	C00788	[M+H]+	184.095	1.22793	2.10043	0.214072	0.0021645	down
Benzamide	C7H7NO	Benzenoids	Benzene and substituted derivatives	HMDB0004461	C09815	[M+H]+	122.059	1.72804	2.08623	0.137676	0.0021645	down
Allyl benzoate	C10H10O2	Benzenoids	Benzene and substituted derivatives	HMDB0040592	null	[M+Hac-H]-	221.082	4.93004	1.52066	0.447247	0.0021645	down
4-(Aminomethyl)benzoic acid	C8H9NO2	Benzenoids	Benzene and substituted derivatives	NA	NA	[M+H]+	152.07	2.54278	2.051	0.247484	0.004329	down
3-Methylphenylacetic acid	C9H10O2	Benzenoids	Benzene and substituted derivatives	HMDB0002222	null	[M+H]+	151.059	1.72935	1.80704	0.227946	0.0021645	down
3,4-Dihydroxybenzaldehyde	C7H6O3	Benzenoids	Benzene and substituted derivatives	HMDB0059965	C16700	[M-H]-	137.025	2.70155	1.74593	0.284591	0.00865801	down
Propofol	C12H18O	Benzenoids	Benzene and substituted derivatives	HMDB0014956	null	[M+FA-H]-	223.134	5.63276	2.19024	5.18878	0.0021645	up
Melanin	C18H10N2O4	Benzenoids	Anthracenes	HMDB0004068	C05606	[M-H]-	317.054	0.95865	1.61056	2.47162	0.0021645	up
Thalsimidine	C37H38N2O7	Lignans, neolignans and related compounds	-	NA	NA	[M+H]+	623.283	8.52215	1.51597	2.39806	0.00865801	up
Plasmenyl-PC 18:0; PC(P-14:0/4:0)	C26H52NO7P	Lipids and lipid-like molecules	Glycerophospholipids	-	C00958	[M+H]+	522.352	6.70583	2.19227	0.17352	0.0021645	down
PC 18:0; PC(9:0/9:0)	C26H52NO8P	Lipids and lipid-like molecules	Glycerophospholipids	-	C00157	[M+H]+	538.345	6.13957	1.33153	0.442128	0.0151515	down
PC 12:0; PC(6:0/6:0)	C20H40NO8P	Lipids and lipid-like molecules	Glycerophospholipids	-	C00157	[M+H]+	454.252	3.5417	2.08723	0.230143	0.0021645	down
Monoelaidin	C21H40O4	Lipids and lipid-like molecules	Glycerolipids	HMDB0011567	NA	[M+H]+	357.298	6.5309	1.72476	0.365655	0.0021645	down
MGDG 34:6; MGDG(16:3/18:3)	C43H70O10	Lipids and lipid-like molecules	Glycerolipids	-	C03692	[M+FA-H]-	791.493	8.86466	1.47575	0.470685	0.0021645	down
LysoPE 18:3	C23H42NO7P	Lipids and lipid-like molecules	Glycerophospholipids	HMDB11478;HMDB11479	C04438	[M+H]+	476.274	5.77796	1.52507	0.459199	0.0151515	down
LysoPE 18:2	C23H44NO7P	Lipids and lipid-like molecules	Glycerophospholipids	HMDB11477	C04438	[M-H]-	476.277	6.11767	1.61506	0.390287	0.0021645	down
LysoPC 18:2	C26H50NO7P	Lipids and lipid-like molecules	Glycerophospholipids	HMDB10386	C04230	[M+FA-H]-	564.329	6.1759	1.75938	0.335344	0.0021645	down
LysoPC 18:1	C26H52NO7P	Lipids and lipid-like molecules	Glycerophospholipids	HMDB02815	C04230	[M+FA-H]-	566.344	6.67713	1.92694	0.302977	0.0021645	down
Dodeca-2(E),4(E)-dienoic acid	C12H20O2	Lipids and lipid-like molecules	Fatty Acyls	NA	NA	[M+H]+	197.153	3.89243	1.86321	0.310167	0.0021645	down
Desoximetasone	C22H29FO4	Lipids and lipid-like molecules	Sterol Lipids	HMDB0014687	null	[M-H]-	375.202	3.87362	2.15938	0.218162	0.0021645	down
3-Phenylpropyl isovalerate	C14H20O2	Lipids and lipid-like molecules	Fatty Acyls	HMDB0036389	null	[M+H]+	221.153	5.12387	1.34584	0.468673	0.004329	down
D-Malic acid	C4H6O5	Lipids and lipid-like molecules	Fatty Acyls	HMDB0031518	C00497	[M-H]-	133.015	0.867433	2.1835	0.211276	0.0021645	down
2-Linoleoylglycerol	C21H38O4	Lipids and lipid-like molecules	Fatty Acyls	HMDB0011538	NA	[M+H]+	355.282	6.08443	1.81802	0.334981	0.0021645	down
Palmitelaidic acid	C16H30O2	Lipids and lipid-like molecules	Fatty Acyls	HMDB0012328	NA	[M+Na]+	277.215	6.75212	1.68859	2.55414	0.0021645	up
Oxandrolone	C19H30O3	Lipids and lipid-like molecules	Sterol Lipids	HMDB0014759	C07346	[M+H]+	307.225	6.53962	1.42787	2.41891	0.0021645	up
Octadecadienoate	C18H32O2	Lipids and lipid-like molecules	Fatty Acyls	HMDB0062784	null	[M-H]-	279.233	7.95932	1.57878	2.28936	0.0021645	up
Nandrolone	C18H26O2	Lipids and lipid-like molecules	Sterol Lipids	HMDB0002725	C07254	[M+H]+	275.199	6.46715	1.5617	2.54428	0.0021645	up
LysoPI 17:0; LysoPI 17:0	C26H51O12P	Lipids and lipid-like molecules	Glycerophospholipids	-	C03819	[M-H]-	585.292	5.70215	1.75563	4.45505	0.00865801	up
LysoPE 16:0	C21H44NO7P	Lipids and lipid-like molecules	Glycerophospholipids	HMDB11473;HMDB11503	C04438	[M-H]-	452.276	6.50738	2.22221	5.06282	0.0021645	up
LysoPE 15:0	C20H42NO7P	Lipids and lipid-like molecules	Glycerophospholipids	HMDB11472	C04438	[M-H]-	438.26	6.12926	1.46271	2.13123	0.0021645	up
LysoPC 16:3	C24H44NO7P	Lipids and lipid-like molecules	Glycerophospholipids	-	C04230	[M+H]+	490.289	5.33792	1.45331	2.25324	0.0021645	up
LysoPC 16:0	C24H50NO7P	Lipids and lipid-like molecules	Glycerophospholipids	-	C04230	[M+FA-H]-	540.329	6.6032	2.41214	6.60936	0.0021645	up
LysoPC 15:0	C23H48NO7P	Lipids and lipid-like molecules	Glycerophospholipids	HMDB10381	C04230	[M+FA-H]-	526.31	6.20102	1.9483	3.46184	0.0021645	up
Linolenelaidic acid	C18H30O2	Lipids and lipid-like molecules	Fatty Acyls	HMDB0030964	null	[M-H]-	277.218	7.61165	1.62774	2.48597	0.0021645	up
Hydrocortisone	C21H30O5	Lipids and lipid-like molecules	Sterol Lipids	HMDB0014879	C00735	[M+H]+	363.211	5.33836	1.44682	2.32072	0.025974	up
Geranyl acetoacetate	C14H22O3	Lipids and lipid-like molecules	Fatty Acyls	HMDB0038256	null	[M-H]-	237.15	5.62967	2.52185	8.02391	0.0021645	up
Ecabet	C20H28O5S	Lipids and lipid-like molecules	Prenol lipids	HMDB0015613	null	[M-H]-	379.157	7.9593	1.72592	3.1015	0.0021645	up
Dodecylbenzenesulfonic acid	C18H30O3S	Lipids and lipid-like molecules	Fatty Acyls	NA	NA	[M-H]-	325.2	4.7525	2.45246	7.21057	0.0021645	up
Dihydrojasmonic acid	C12H20O3	Lipids and lipid-like molecules	Fatty Acyls	HMDB0033601	null	[M+H]+	213.148	4.38602	1.86915	3.39695	0.0021645	up
Bexarotene	C24H28O2	Lipids and lipid-like molecules	Prenol lipids	HMDB0014452	null	[M+H]+	349.197	4.78465	2.19818	4.51179	0.0021645	up
9-OxoODE	C18H30O3	Lipids and lipid-like molecules	Fatty Acyls	HMDB0004669	C14766	[M-H]-	293.21	7.60908	1.43551	2.12514	0.0021645	up
9-Hydroperoxy-10E,12Z,15Z-octadecatrienoic acid	C18H30O4	Lipids and lipid-like molecules	Fatty Acyls	NA	NA	[M-H]-	309.205	6.25787	1.6775	2.54524	0.0021645	up
9,10-Dihydroxy-12Z-octadecenoic acid	C18H34O4	Lipids and lipid-like molecules	Fatty Acyls	HMDB0004704	C14828	[M-H]-	313.237	5.87472	2.54679	7.52625	0.0021645	up
9,10,13-TriHOME	C18H34O5	Lipids and lipid-like molecules	Fatty Acyls	HMDB0004710	C14835	[M-H]-	329.233	4.58103	2.16689	4.70772	0.0021645	up
3,4-Methylenesebacic acid	C12H18O4	Lipids and lipid-like molecules	Fatty Acyls	HMDB0059729	null	[M-H]-	225.113	4.20236	1.41963	2.43601	0.00865801	up
17-Hydroxylinolenic acid	C18H30O3	Lipids and lipid-like molecules	Fatty Acyls	HMDB0011108	C16346	[M-H]-	293.211	6.24608	1.59646	2.29187	0.0021645	up
15,16-DiHODE	C18H32O4	Lipids and lipid-like molecules	Fatty Acyls	HMDB0010208	null	[M-H]-	311.222	5.5281	2.8903	14.6813	0.0021645	up
13-OxoODE	C18H30O3	Lipids and lipid-like molecules	Fatty Acyls	HMDB0004668	C14765	[M-H]-	293.211	6.59498	1.56731	2.65689	0.0021645	up
13-Nor-6-eremophilene-8,11-dione	C14H20O2	Lipids and lipid-like molecules	Prenol lipids	HMDB0037606	null	[M-H]-	219.139	4.06	2.14905	4.32033	0.0021645	up
11-Methyl-7-oxatetracyclo[6.3.1.01,6.04,11]dodecane	C12H18O	Lipids and lipid-like molecules	Prenol lipids	HMDB0035055	null	[M+H]+	179.142	6.74962	1.59807	2.3516	0.0021645	up
(9S,10E,12S,13S)-9,12,13-Trihydroxy-10-octadecenoic acid	C18H34O5	Lipids and lipid-like molecules	Fatty Acyls	HMDB0038555	null	[M-H]-	329.232	4.86915	2.15572	4.45149	0.0021645	up
(2'E,4'Z,7'Z,8E)-Colnelenic acid	C18H28O3	Lipids and lipid-like molecules	Fatty Acyls	HMDB0030996	C16320	[M-H]-	291.196	6.2677	2.18235	4.7474	0.0021645	up
(1'R)-Nepetalic acid	C10H16O3	Lipids and lipid-like molecules	Prenol lipids	HMDB0036117	null	[M+Hac-H]-	243.123	3.57065	2.52392	8.12225	0.0021645	up
(10E,12Z)-9-HODE	C18H32O3	Lipids and lipid-like molecules	Fatty Acyls	HMDB0062652	null	[M-H]-	295.228	6.55098	1.90624	3.19116	0.0021645	up
(+)-Abscisic acid	C15H20O4	Lipids and lipid-like molecules	Prenol lipids	HMDB0035140	C06082	[M-H]-	263.129	4.06007	2.35845	6.10135	0.0021645	up
trans-Zeatin riboside	C15H21N5O5	Nucleosides, nucleotides, and analogues	Purine nucleosides	HMDB0030388	0	[M+H]+	352.16	2.53215	1.82556	3.18126	0.0021645	up
N2,N2-Dimethylguanosine	C12H17N5O5	Nucleosides, nucleotides, and analogues	Purine nucleosides	HMDB0004824	null	[M+H]+	312.129	2.14245	1.97244	3.90984	0.0021645	up
Guanosine-3',5'-cyclic monophosphate	C10H12N5O7P	Nucleosides, nucleotides, and analogues	-	NA	NA	[M+H]+	346.053	1.46099	2.32012	5.86463	0.0021645	up
Guanosine monophosphate	C10H14N5O8P	Nucleosides, nucleotides, and analogues	Purine nucleotides	HMDB0001397	C00144	[M+H]+	364.064	1.55328	2.99997	18.2906	0.0021645	up
Guanosine 5'-monophosphate	C10H14N5O8P	Nucleosides, nucleotides, and analogues	Purine nucleotides	NA	NA	[M-H]-	362.05	1.5431	3.12805	25.8406	0.0021645	up
Guanosine 2',3'-cyclic phosphate	C10H12N5O7P	Nucleosides, nucleotides, and analogues	Purine nucleotides	HMDB0011629	C06194	[M+H]+	346.053	0.85685	1.84737	3.41224	0.0021645	up
Cytidine-3'-monophosphate	C9H14N3O8P	Nucleosides, nucleotides, and analogues	NA	HMDB0001202	C00239	[M-H]-	322.043	0.847617	2.48606	7.87644	0.0021645	up
Cytidine	C9H13N3O5	Nucleosides, nucleotides, and analogues	Pyrimidine nucleosides	HMDB0000089	C00475	[M+H]+	244.091	0.827558	2.25436	5.21553	0.0021645	up
Cyclic AMP	C10H12N5O6P	Nucleosides, nucleotides, and analogues	Purine nucleotides	HMDB0000058	C00575	[M+H]+	330.059	1.23067	1.95938	3.60256	0.0021645	up
Adenosine 5'-monophosphate	C10H14N5O7P	Nucleosides, nucleotides, and analogues	Purine nucleotides	HMDB0000045	C00020	[M+H]+	348.069	1.23234	1.6036	2.62901	0.0021645	up
Guanosine	C10H13N5O5	Nucleosides, nucleotides, and analogues	Purine nucleosides	HMDB0000133	C00387	[M-H]-	282.083	1.24462	2.38317	6.2884	0.0021645	up
3',5'-Cyclic AMP	C10H12N5O6P	Nucleosides, nucleotides, and analogues	Purine nucleotides	NA	NA	[M-H]-	328.044	1.22548	1.90582	3.58647	0.0021645	up
N-Methylhydantoin	C4H6N2O2	Organic acids and derivatives	Organic carbonic acids and derivatives	HMDB0003646	C02565	[M+H]+	115.054	1.53796	1.75879	0.260728	0.0151515	down
Maleic acid	C4H4O4	Organic acids and derivatives	Carboxylic acids and derivatives	HMDB0000176	C01384	[M-H]-	115.004	0.867733	2.22937	0.201272	0.0021645	down
L-Threonine	C4H9NO3	Organic acids and derivatives	Carboxylic acids and derivatives	HMDB0000167	C00188	[M-H]-	118.052	0.77545	1.46602	0.471375	0.0021645	down
L-Glutamic acid	C5H9NO4	Organic acids and derivatives	Carboxylic acids and derivatives	HMDB0000148	C00025	[M-H]-	146.048	0.795258	2.21634	0.204188	0.0021645	down
Glutamic acid	C5H9NO4	Organic acids and derivatives	Carboxylic acids and derivatives	HMDB0000148	C00025	[M+H]+	148.06	0.852	1.91457	0.30361	0.0021645	down
DL-.alpha.-Phenylglycine	C8H9NO2	Organic acids and derivatives	Carboxylic acids and derivatives	HMDB0002210	NA	[M+H]+	152.07	4.05862	1.82595	0.243209	0.00865801	down
Asn-Phe	C13H17N3O4	Organic acids and derivatives	Carboxylic acids and derivatives	HMDB0028738	NA	[M+H]+	280.153	2.29617	1.88702	0.296001	0.0021645	down
Allantoic acid	C4H8N4O4	Organic acids and derivatives	Carboxylic acids and derivatives	HMDB0001209	C00499	[M+H]+	177.061	0.87495	1.58574	0.39421	0.0021645	down
Z-Val-Ala-Asp-AMC	C30H34N4O9	Organic acids and derivatives	Carboxylic acids and derivatives	NA	NA	[M+H]+	595.252	7.57275	1.532	2.53928	0.0021645	up
Valyl-Valine	C10H20N2O3	Organic acids and derivatives	Carboxylic acids and derivatives	HMDB0029140	null	[M+H]+	217.153	1.83935	2.14373	4.47141	0.0021645	up
Val-Pro	C10H18N2O3	Organic acids and derivatives	Carboxylic acids and derivatives	HMDB0029135	NA	[M+H]+	215.138	1.94657	1.73904	3.00227	0.0021645	up
Val-Leu	C11H22N2O3	Organic acids and derivatives	Carboxylic acids and derivatives	HMDB0029131	NA	[M-H]-	229.155	2.41283	1.88767	3.66428	0.0021645	up
Thr-Val	C9H18N2O4	Organic acids and derivatives	Carboxylic acids and derivatives	HMDB0029074	NA	[M+H]+	219.133	1.25977	2.02065	3.68832	0.0021645	up
Thr-Leu	C10H20N2O4	Organic acids and derivatives	Carboxylic acids and derivatives	HMDB0029065	NA	[M-H]-	231.135	2.1552	2.14749	4.55724	0.0021645	up
Ser-Phe	C12H16N2O4	Organic acids and derivatives	Carboxylic acids and derivatives	HMDB0029046	NA	[M+H]+	253.117	2.28188	1.49756	2.19336	0.0021645	up
Ser-Leu	C9H18N2O4	Organic acids and derivatives	Carboxylic acids and derivatives	HMDB0029043	NA	[M+H]+	219.134	2.09623	2.46046	6.81057	0.0021645	up
Pyruvic acid	C3H4O3	Organic acids and derivatives	Keto acids and derivatives	HMDB0000243	C00022	[M-H]-	87.0094	0.879425	1.47844	2.22768	0.0021645	up
Proline	C5H9NO2	Organic acids and derivatives	Carboxylic acids and derivatives	HMDB0000162	C00148	[M+H]+	116.07	0.822967	1.75402	2.79639	0.0021645	up
Phe-Pro	C14H18N2O3	Organic acids and derivatives	Carboxylic acids and derivatives	HMDB11177	NA	[M+H]+	263.138	2.59872	2.04731	3.84538	0.0021645	up
Phenylalanine	C9H11NO2	Organic acids and derivatives	Carboxylic acids and derivatives	HMDB0000159	C00079	[M+H]+	166.086	2.04365	1.53749	2.17884	0.0021645	up
Leu-Val	C11H22N2O3	Organic acids and derivatives	Carboxylic acids and derivatives	HMDB0028942	NA	[M+H]+	231.17	2.31387	2.06985	4.27167	0.0021645	up
Leu-Pro	C11H20N2O3	Organic acids and derivatives	Carboxylic acids and derivatives	HMDB0011175	NA	[M+H]+	229.154	2.29803	2.35189	5.75091	0.0021645	up
Leu-Glu	C11H20N2O5	Organic acids and derivatives	Carboxylic acids and derivatives	HMDB0028928	NA	[M+H]+	261.144	1.48495	2.0968	4.24345	0.0021645	up
Leucine	C6H13NO2	Organic acids and derivatives	Carboxylic acids and derivatives	HMDB0000687	C00123	[M+H]+	132.102	1.45368	1.40374	2.11543	0.00865801	up
L-(-)-Phenylalanine	C9H11NO2	Organic acids and derivatives	Carboxylic acids and derivatives	NA	NA	[M-H]-	164.072	2.03748	1.79315	2.84077	0.0021645	up
Glycyl-L-norleucine	C8H16N2O3	Organic acids and derivatives	Carboxylic acids and derivatives	NA	NA	[M+H]+	189.123	2.16732	1.85629	3.06863	0.0021645	up
Glu-Leu	C11H20N2O5	Organic acids and derivatives	Carboxylic acids and derivatives	HMDB0028823	NA	[M+H]+	261.144	2.21105	2.45851	6.91894	0.0021645	up
Gln-Leu	C11H21N3O4	Organic acids and derivatives	Carboxylic acids and derivatives	HMDB0028801	NA	[M+H]+	260.16	2.11825	2.23908	5.20473	0.0021645	up
Gln-Ile	C11H21N3O4	Organic acids and derivatives	Carboxylic acids and derivatives	HMDB0028800	NA	[M-H]-	258.145	2.10876	2.01384	4.60398	0.0021645	up
D-(+)-Pantothenic acid	C9H17NO5	Organic acids and derivatives	Carboxylic acids and derivatives	NA	NA	[M+H]+	220.136	2.09662	1.4627	2.22308	0.0021645	up
Betaine	C5H11NO2	Organic acids and derivatives	Carboxylic acids and derivatives	HMDB0000043	C00719	[M+Na]+	140.068	0.785867	1.43537	2.04399	0.0021645	up
Ala-Pro	C8H14N2O3	Organic acids and derivatives	Carboxylic acids and derivatives	HMDB0028695	NA	[M+H]+	187.111	4.07607	2.11455	4.2782	0.0021645	up
Acetic anhydride	C4H6O3	Organic acids and derivatives	Carboxylic acids and derivatives	HMDB0031646	null	[M+FA-H]-	147.031	0.8811	1.45969	2.11911	0.0021645	up
Linoleoyl ethanolamide	C20H37NO2	Organic nitrogen compounds	Organonitrogen compounds	HMDB0012252	NA	[M+H]+	324.287	7.32733	1.75769	2.73184	0.0021645	up
Trehalose	C12H22O11	Organic oxygen compounds	Organooxygen compounds	HMDB0000975	C01083	[M+Na]+	365.103	0.813133	1.81901	0.250481	0.0021645	down
Sucrose	C12H22O11	Organic oxygen compounds	Organooxygen compounds	HMDB0000258	C00089	[M+FA-H]-	387.113	0.806742	2.45113	0.154751	0.0021645	down
Malondialdehyde	C3H4O2	Organic oxygen compounds	Organooxygen compounds	HMDB0006112	C19440	[M-H]-	71.0146	0.88185	1.73885	0.352121	0.0021645	down
Glucaric acid	C6H10O8	Organic oxygen compounds	Organooxygen compounds	HMDB0000663	NA	[M-H]-	209.032	0.878975	1.45357	0.465248	0.0021645	down
D-Ribose 1-phosphate	C5H11O8P	Organic oxygen compounds	Organooxygen compounds	HMDB0001489	NA	[M-H]-	229.011	0.940508	1.59581	0.385924	0.00865801	down
4-Methylcyclohexanone	C7H12O	Organic oxygen compounds	Organooxygen compounds	HMDB0031540	null	[M+FA-H]-	157.087	3.12748	2.41065	0.140217	0.0021645	down
Mannose 6-phosphate	C6H13O9P	Organic oxygen compounds	Organooxygen compounds	HMDB0001078	C00275	[M+H]+	261.036	0.927308	1.6802	0.39841	0.0021645	down
2-Deoxyribose 5-phosphate	C5H11O7P	Organic oxygen compounds	Organooxygen compounds	HMDB0001031	C00673	[M+FA-H]-	259.022	0.919967	2.24474	0.20275	0.0021645	down
Cytidine 2'-phosphate	C9H14N3O8P	Organic oxygen compounds	Organooxygen compounds	HMDB0011692	C03104	[M+H]+	324.058	1.23013	2.77016	11.6442	0.0021645	up
Chlorogenic acid	C16H18O9	Organic oxygen compounds	Organooxygen compounds	HMDB0003164	NA	[M-H]-	353.089	0.819583	1.59178	2.49926	0.0021645	up
Adenosine 2'-monophosphate	C10H14N5O7P	Organic oxygen compounds	Organooxygen compounds	HMDB0011617	C00946	[M-H]-	346.055	1.23447	1.5283	2.70833	0.004329	up
Uric acid	C5H4N4O3	Organoheterocyclic compounds	Imidazopyrimidines	HMDB0000289	C00366	[M+H]+	169.035	1.2286	2.12012	0.163253	0.004329	down
Serotonin	C10H12N2O	Organoheterocyclic compounds	Indoles and derivatives	HMDB0000259	C00780	[M+H]+	177.102	1.5438	1.91979	0.193874	0.0151515	down
Mesohydroxy uroporphyrin III	C40H38N4O17	Organoheterocyclic compounds	Tetrapyrroles and derivatives	HMDB0003327	null	[M-H]-	845.214	3.46428	1.99311	0.239613	0.004329	down
Hv-NCC-1	C35H42N4O10	Organoheterocyclic compounds	Tetrapyrroles and derivatives	HMDB0039005	null	[M-H]-	677.282	3.60444	2.63636	0.104628	0.0021645	down
Dehydrosalsolidine	C12H15NO2	Organoheterocyclic compounds	-	NA	NA	[M+H]+	206.116	2.05242	2.32845	0.132343	0.0021645	down
Sedanolide	C12H18O2	Organoheterocyclic compounds	Lactones	HMDB0034450	NA	[M+H]+	195.137	4.61072	1.46996	2.37764	0.0021645	up
Sclareolide	C16H26O2	Organoheterocyclic compounds	Naphthofurans	HMDB0035293	NA	[M+H]+	251.199	7.08938	2.20613	4.85123	0.0021645	up
Propantheline cation	C23H30NO3	Organoheterocyclic compounds	Benzopyrans	HMDB0014920	C07506	[M+Na]+	391.216	2.08475	1.46573	2.40608	0.0021645	up
Nicotinic acid	C6H5NO2	Organoheterocyclic compounds	Pyridines and derivatives	HMDB0001488	C00253	[M+H]+	124.038	0.833767	1.73899	2.89667	0.0021645	up
Isopentenyladenosine	C15H21N5O4	Organoheterocyclic compounds	-	NA	NA	[M+H]+	336.165	3.309	2.91611	15.3866	0.0021645	up
Isonicotinic acid	C6H5NO2	Organoheterocyclic compounds	Pyridines and derivatives	HMDB0060665	C07446	[M+H]+	124.039	1.22875	2.38283	6.26876	0.0021645	up
Harderoporphyrin	C35H36N4O6	Organoheterocyclic compounds	Tetrapyrroles and derivatives	HMDB0000683	null	[M-H]-	607.253	8.00677	2.0328	4.90463	0.0021645	up
Guanine	C5H5N5O	Organoheterocyclic compounds	Imidazopyrimidines	HMDB0000132	C00242	[M+H]+	152.058	1.25077	2.17969	4.38166	0.0021645	up
Anileridine	C22H28N2O2	Organoheterocyclic compounds	Piperidines	HMDB0015049	null	[M+H]+	353.228	4.59595	2.00437	3.71126	0.0021645	up
Alantolactone	C15H20O2	Organoheterocyclic compounds	Naphthofurans	HMDB0035906	C09289	[M+H]+	233.153	5.65752	2.00482	3.69676	0.0021645	up
Adenine	C5H5N5	Organoheterocyclic compounds	Imidazopyrimidines	HMDB0000034	C00147	[M+H]+	136.062	0.83345	2.66043	9.71111	0.0021645	up
Dimethyl sulfone	C2H6O2S	Organosulfur compounds	Sulfonyls	HMDB0004983	C11142	[M+NH4]+	112.051	0.811733	1.31274	2.1151	0.0021645	up
isorhamnetin-3-O-galactoside-6''-rhamnoside	C28H32O16	Phenylpropanoids and polyketides	Flavonoids	NA	NA	[M-H]-	623.162	3.49115	1.99894	0.169245	0.0411255	down
Apiin	C26H28O14	Phenylpropanoids and polyketides	Flavonoids	HMDB0030843	C04858	[M+H]+	565.154	2.54278	2.34228	0.15995	0.0151515	down
3,5-Dimethoxy-4-hydroxycinnamic acid	C11H12O5	Phenylpropanoids and polyketides	Cinnamic acids and derivatives	HMDB0032616	C00482	[M-H]-	223.06	3.35265	1.97289	0.281603	0.0021645	down
3-(2-Hydroxyphenyl)propionic acid	C9H10O3	Phenylpropanoids and polyketides	Phenylpropanoic acids	HMDB0033752	C01198	[M+NH4]+	184.095	0.86465	2.21205	0.205372	0.0021645	down
Isoswertisin 4'-glucoside	C28H32O15	Phenylpropanoids and polyketides	Flavonoids	HMDB0037416	null	[M+H]+	609.18	3.30888	1.91317	3.38658	0.004329	up
3-[4-Hydroxy-3-(3-methyl-2-butenyl)phenyl]-2-propenal	C14H16O2	Phenylpropanoids and polyketides	Cinnamaldehydes	HMDB0040833	null	[M+NH4]+	234.134	2.50557	3.23962	32.6151	0.0021645	up
3,6-Diglucopyranosyl-5,7-dihydroxy-4'-methoxyflavone	C28H32O15	Phenylpropanoids and polyketides	Flavonoids	HMDB0037413	null	[M-H]-	607.166	3.27968	1.91528	3.54741	0.004329	up
(E)-3-(4-Hydroxyphenyl)-2-propenal	C9H8O2	Phenylpropanoids and polyketides	Cinnamaldehydes	HMDB0040986	C05608	[M+H]+	149.059	2.04495	1.56884	2.32735	0.0021645	up
Monolinolenin (9c,12c,15c)	C21H36O4	Unknown	-	NA	NA	[M+H]+	353.267	6.29595	1.68657	0.365379	0.004329	down
Elastase Substrate IV, Colorimetric	C25H34N6O9	Unknown	-	NA	NA	[M+H]+	563.261	7.8856	1.50254	0.395105	0.00865801	down
4-O-.beta.-Galactopyranosyl-D-mannopyranose	C12H22O11	Unknown	-	NA	NA	[M-H]-	341.108	0.80305	2.34263	0.155565	0.0021645	down
4-Demethylsimmondsin 2'-ferulate	C25H31NO12	Unknown	-	NA	NA	[M+H]+	538.189	2.24077	2.30356	0.19192	0.004329	down
Santonin	C15H18O3	Unknown	-	NA	NA	[M+H]+	247.132	4.08212	2.51167	7.42182	0.0021645	up
N-Benzylglycine methyl ester	C10H13NO2	Unknown	-	NA	NA	[M+NH4]+	197.127	2.20365	1.37395	2.2841	0.0021645	up
Herbacetin-3,8-diglucopyranoside	C27H30O17	Unknown	-	NA	NA	[M-H]-	625.151	2.00878	2.57709	8.63118	0.0021645	up
Ethyl (??)-2-ethyl-3-phenylpropanoate	-	Unknown	Unknown	-	-	[M+H]+	207.137	5.2	2.06734	4.69013	0.0021645	up
DL-Sulforaphane N-acetyl-L-cysteine	C11H20N2O4S3	Unknown	-	NA	NA	[M-H]-	339.037	2.50716	1.25941	2.03204	0.0021645	up
Cytidine 2',3'-cyclic monophosphoric acid	C9H12N3O7P	Unknown	-	NA	NA	[M-H]-	304.033	0.822258	1.92341	3.85201	0.0021645	up
9-Oxo-11-(3-pentyl-2-oxiranyl)-10E-undecenoic acid	C18H30O4	Unknown	-	NA	NA	[M-H]-	309.206	5.83143	2.02832	4.09595	0.0021645	up
9-Oxo-10E,12Z,15Z-octadecatrienoic acid	C18H28O3	Unknown	-	NA	NA	[M+H]+	293.21	6.48977	1.67204	2.68994	0.0021645	up
9-Oxo-10(E),12(E)-octadecadienoic acid	C18H30O3	Unknown	-	NA	NA	[M+H]+	295.226	5.56667	2.47872	7.15912	0.0021645	up
9,12-Octadecadiynoic acid	C18H28O2	Unknown	-	NA	NA	[M+H]+	277.215	6.28525	1.70683	2.55904	0.0021645	up
2-Hexyldecanoic acid	C16H32O2	Unknown	-	NA	NA	[M+Na]+	279.231	6.59332	1.4883	2.15088	0.00865801	up
2''-Galloylhyperin	C28H24O16	Unknown	-	NA	NA	[M-H]-	615.13	3.38576	1.34494	2.20204	0.00865801	up
2,4-Dimethylcinnamic acid	C11H12O2	Unknown	-	NA	NA	[M+NH4]+	194.117	2.00635	1.53381	2.94064	0.00865801	up
2,3-Dinorthromboxane B1	C18H32O6	Unknown	-	NA	NA	[M-H]-	343.212	4.09211	2.61391	9.2253	0.0021645	up
