# Supplementary material for: Transcriptome and Metabolome Analyses Revealed the Response Mechanism of Sugar Beet to Salt Stress of Different Durations
Source: Int J Mol Sci. 2022 Aug 24;23(17):9599. doi: 10.3390/ijms23179599 (PMC9455719; doi:10.3390/ijms23179599)
Supplement: Supplementary file 1 [file ijms-23-09599-s001.zip › Table S5 Details information of differentially accumulated metabolites (DAMs) in roots under salt-stress.xlsx]

## Sheet: Sheet1
Table S7 Details information of differentially accumulated metabolites (DAMs) in roots under salt-stress
Metabolite	Formula	Superclass	Class	MS2.HMDB	MS2.KEGG	adduct.ion	MZ	RT	VIP	ratio	q-value	Type
Ajmaline	C20H26N2O2	Alkaloids and derivatives	Ajmaline-sarpagine alkaloids	HMDB0015495	C06542	[M-H]-	325.2	4.67455	1.78434	2.50216	0.0146318	up
Floribundine	C18H19NO2	Alkaloids and derivatives	Aporphines	HMDB0030312	null	[M-H]-	280.135	4.5887	1.71323	0.446731	0.00841063	down
Napelline	C22H33NO3	Alkaloids and derivatives	-	NA	NA	[M+H]+	360.252	6.47074	1.56849	2.09036	0.00841063	up
Sanguinarine	C20H14NO4	Alkaloids and derivatives	Benzophenanthridine alkaloids	HMDB0029367	C06162	[M-H]-	331.082	1.4778	2.21716	0.276704	0.00841063	down
[7]-Paradol	C18H28O3	Benzenoids	Phenols	HMDB0040806	null	[M-H]-	291.195	6.01223	1.63408	2.09633	0.00841063	up
1,2-Diacylglycerol-LD-PI-pool	C7H5NO	Benzenoids	Benzene and substituted derivatives	HMDB0062270	null	[M+FA-H]-	164.034	2.72127	2.29097	0.253995	0.00841063	down
1-Naphthalenamine	C10H9N	Benzenoids	Naphthalenes	NA	C14790	[M+H]+	144.08	2.38857	1.86733	2.47205	0.00841063	up
2-Aminonaphthalene	C10H9N	Benzenoids	Naphthalenes	HMDB0041802	C02227	[M-H]-	142.065	2.37252	2.0709	3.05999	0.00841063	up
2-Hydroxy-6-(8-tridecenyl)benzoic acid	C20H30O3	Benzenoids	Benzene and substituted derivatives	HMDB0038521	null	[M-H]-	317.21	7.14175	1.69459	2.13631	0.00841063	up
3,4',5-Biphenyltriol	C12H10O3	Benzenoids	Benzene and substituted derivatives	HMDB0032713	null	[M+FA-H]-	247.058	2.85524	1.73214	0.44017	0.00841063	down
4-Aminosalicylic acid	C7H7NO3	Benzenoids	Benzene and substituted derivatives	HMDB0014378	C02518	[M+H]+	154.049	2.18786	1.70167	0.470881	0.00841063	down
Amisulpride	C17H27N3O4S	Benzenoids	Benzene and substituted derivatives	HMDB0015633	null	[M+H]+	370.185	2.58024	1.93287	0.373747	0.00841063	down
Benzenepropanoic acid, 5-(3-carboxybenzoyl)-2-[[(5E)-6-(4-methoxyphenyl)-5-hexen-1-yl]oxy]-	C30H30O7	Benzenoids	Benzene and substituted derivatives	NA	NA	[M-H]-	501.198	4.60667	1.7056	2.2297	0.00841063	up
Candesartan	C24H20N6O3	Benzenoids	Benzene and substituted derivatives	HMDB0014934	C07468	[M-H]-	439.161	4.05206	1.87205	2.62186	0.00841063	up
Diphenylpyraline	C19H23NO	Benzenoids	Benzene and substituted derivatives	HMDB0015277	NA	[M+H]+	282.184	6.33085	2.44926	0.20277	0.00841063	down
Methyl phenylacetate	C9H10O2	Benzenoids	Benzene and substituted derivatives	HMDB0032617	null	[M+NH4]+	168.101	0.850133	1.95035	0.362243	0.00841063	down
Moupinamide	C18H19NO4	Benzenoids	Phenols	HMDB0029365	C02717	[M+H]+	314.139	3.87929	1.91267	2.64244	0.00841063	up
Phenyl acetate	C8H8O2	Benzenoids	Phenol esters	HMDB0040733	C00548	[M+H]+	137.059	5.5983	1.72245	2.58188	0.00841063	up
Phenylephrine	C9H13NO2	Benzenoids	Phenols	HMDB0002182	C07441	[M+H]+	168.101	1.2446	2.14032	0.304932	0.00841063	down
Tiapride	C15H24N2O4S	Benzenoids	Benzene and substituted derivatives	HMDB0042039	null	[M+H]+	329.149	2.49388	1.61039	0.488978	0.00841063	down
Vanillic acid	C8H8O4	Benzenoids	Benzene and substituted derivatives	HMDB0000484	C06672	[M+H]+	169.049	2.91868	1.62634	2.00725	0.00841063	up
3-Methyl-3-heptene	C8H16	Hydrocarbons	Unsaturated hydrocarbons	HMDB0061909	null	[M+Na]+	135.116	5.70952	1.56841	2.60166	0.0261262	up
(+)-Abscisic acid	C15H20O4	Lipids and lipid-like molecules	Prenol lipids	HMDB0035140	C06082	[M-H]-	263.127	4.03063	2.3748	4.56618	0.00841063	up
(2'E,4'Z,7'Z,8E)-Colnelenic acid	C18H28O3	Lipids and lipid-like molecules	Fatty Acyls	HMDB0030996	C16320	[M+H]+	293.211	6.02938	1.72831	2.41051	0.00841063	up
(5.alpha.)-Androst-2-en-17-one	C19H28O	Lipids and lipid-like molecules	Sterol Lipids	NA	NA	[M+H]+	273.22	6.33997	1.70583	2.19299	0.00841063	up
(ent-6alpha,7alpha)-6,7-Dihydroxy-16-kauren-19-oic acid	C20H30O4	Lipids and lipid-like molecules	Prenol lipids	HMDB0036763	C11876	[M-H]-	333.206	6.31857	1.55388	2.0003	0.00841063	up
11b-Hydroxyprogesterone	C20H28O4	Lipids and lipid-like molecules	Sterol Lipids	HMDB0004031	C05498	[M-H]-	331.189	6.17073	1.64087	2.44053	0.00841063	up
12(13)Ep-9-KODE	C18H30O4	Lipids and lipid-like molecules	Fatty Acyls	HMDB0013623	null	[M+H]+	311.221	6.03617	1.74157	2.37582	0.00841063	up
15-Deoxy-d-12,14-PGJ2	C20H28O3	Lipids and lipid-like molecules	Fatty Acyls	HMDB0005079	C14717	[M+H]+	317.21	6.19368	1.65787	2.34527	0.00841063	up
1-Heptadecanoyl-sn-glycero-3-phosphocholine	C25H52NO7P	Lipids and lipid-like molecules	Glycerophospholipids	NA	NA	[M+H]+	510.352	6.82547	1.73472	2.30096	0.00841063	up
20-dihydroxyleukotriene B4	C20H32O6	Lipids and lipid-like molecules	Fatty Acyls	HMDB0012635	null	[M-H]-	367.21	5.27955	1.56974	2.38242	0.00841063	up
2-Hydroxyestradiol	C18H24O3	Lipids and lipid-like molecules	Sterol Lipids	HMDB0000338	C05301	[M-H]-	287.163	4.6837	2.16371	3.51221	0.00841063	up
2-Isopropylmalic acid	C7H12O5	Lipids and lipid-like molecules	NA	HMDB0000402	C02504	[M-H]-	175.061	2.68992	1.69502	0.476218	0.00841063	down
3,4-Dimethyl-5-propyl-2-furandecanoic acid	C19H32O3	Lipids and lipid-like molecules	Fatty Acyls	HMDB0094643	null	[M-H]-	307.226	5.54911	1.76768	2.2597	0.00841063	up
3b-Hydroxy-6b-methoxy-7(11)-eremophilen-12,8a-olide	C16H24O4	Lipids and lipid-like molecules	Prenol lipids	HMDB0040755	null	[M-H]-	279.158	5.87465	1.65657	2.10882	0.00841063	up
4-Androstene-11.beta.,17.beta.-diol-3-one	C19H28O3	Lipids and lipid-like molecules	Sterol Lipids	HMDB12533	C18075	[M+H]+	305.21	6.32148	1.62263	2.34222	0.00841063	up
4-Hydroxyretinoic acid	C20H28O3	Lipids and lipid-like molecules	Prenol lipids	HMDB0006254	C16677	[M-H]-	315.194	5.81412	2.15675	4.76855	0.00841063	up
5b-Dihydrotestosterone	C19H30O2	Lipids and lipid-like molecules	Sterol Lipids	HMDB0006770	C05293	[M-H]-	289.216	6.16566	1.7045	2.14855	0.00841063	up
7.alpha.-Hydroxytestosterone	C19H28O3	Lipids and lipid-like molecules	Sterol Lipids	HMDB0003956	C05291	[M+H]+	305.21	7.31866	1.50548	2.03033	0.00841063	up
7a-Hydroxytestosterone	C19H28O3	Lipids and lipid-like molecules	Sterol Lipids	HMDB0003956	C05291	[M+FA-H]-	349.2	6.16947	1.62585	2.54283	0.00841063	up
9-Hydroperoxy-10E,12Z,15Z-octadecatrienoic acid	C18H30O4	Lipids and lipid-like molecules	Fatty Acyls	NA	NA	[M-H]-	309.206	6.00897	1.72913	2.33213	0.00841063	up
Acylcarnitine 6:1	C13H24NO4	Lipids and lipid-like molecules	Fatty Acyls	HMDB13161	C02301	[M]+	258.17	2.52053	1.6402	0.471276	0.00841063	down
Androstan-4,6-diene-17.beta.-ol-3-one	C19H26O2	Lipids and lipid-like molecules	Sterol Lipids	NA	NA	[M+H]+	287.199	6.88372	1.71875	2.22937	0.00841063	up
Androstenedione	C19H26O2	Lipids and lipid-like molecules	Sterol Lipids	HMDB0000053	C00280	[M-H]-	285.184	6.03728	1.64331	2.05806	0.00841063	up
Androstenol	C19H30O	Lipids and lipid-like molecules	Sterol Lipids	HMDB0005935	null	[M-H]-	273.221	6.97958	1.60508	2.00617	0.00841063	up
Avenoleic acid	C18H32O3	Lipids and lipid-like molecules	Fatty Acyls	HMDB0029978	null	[M-H]-	295.226	6.98648	1.66198	2.33387	0.0146318	up
Camelledionol	C29H44O3	Lipids and lipid-like molecules	Prenol lipids	HMDB0035730	null	[M+H]+	441.334	7.88095	2.18161	3.43617	0.00841063	up
cis-5,8,11,14,17-Eicosapentaenoic acid	C20H30O2	Lipids and lipid-like molecules	Fatty Acyls	HMDB0001999	C06428	[M+H]+	303.23	7.46407	1.96993	0.346135	0.00841063	down
Cis-8,11,14,17-Eicosatetraenoic acid	C20H32O2	Lipids and lipid-like molecules	Fatty Acyls	HMDB0002177	null	[M-H]-	303.231	7.76149	2.70382	0.145996	0.00841063	down
Cis-Zeatin-o-glucoside	C16H23N5O6	Lipids and lipid-like molecules	Fatty Acyls	HMDB0012203	C15546	[M+H]+	382.171	2.07992	1.85019	0.41201	0.00841063	down
Dihydrojasmonic acid	C12H20O3	Lipids and lipid-like molecules	Fatty Acyls	HMDB0033601	null	[M+H]+	213.148	4.54838	1.64105	2.11771	0.00841063	up
Eicosapentaenoic acid	C20H30O2	Lipids and lipid-like molecules	Fatty Acyls	HMDB0001999	C06428	[M-H]-	301.215	7.44177	2.7725	0.131922	0.00841063	down
Ethyl hydrogen fumarate	C6H8O4	Lipids and lipid-like molecules	Fatty Acyls	HMDB0040207	null	[M+H]+	145.049	1.48807	1.82328	0.420135	0.00841063	down
Ethylmalonic acid	C5H8O4	Lipids and lipid-like molecules	Fatty Acyls	HMDB0000622	NA	[M-H]-	131.034	1.86888	1.91231	0.378132	0.00841063	down
Etiocholanolone sulfate	C19H30O5S	Lipids and lipid-like molecules	Sterol Lipids	HMDB0013232	null	[M-H]-	369.182	6.7274	1.82255	2.38229	0.00841063	up
Gamma-Linolenic acid	C18H30O2	Lipids and lipid-like molecules	Fatty Acyls	HMDB0003073	C06426	[M-H]-	277.216	7.50108	1.80753	2.46077	0.00841063	up
Gibberellin A64	C20H26O5	Lipids and lipid-like molecules	Prenol lipids	HMDB0036894	null	[M+H]+	347.16	5.24487	1.65297	2.48284	0.00841063	up
Glycerol 3-phosphate	C3H9O6P	Lipids and lipid-like molecules	Glycerophospholipids	HMDB0000126	C00093	[M-H]-	171.005	0.786583	1.60371	2.05197	0.00841063	up
Jasmonic acid	C12H18O3	Lipids and lipid-like molecules	Fatty Acyls	HMDB0032797	C08491	[M+H]+	211.132	4.86672	1.95358	2.82066	0.00841063	up
LysoPC 11:0	C19H40NO7P	Lipids and lipid-like molecules	Glycerophospholipids	-	C04230	[M+H]+	426.26	6.37687	1.7167	2.22877	0.00841063	up
LysoPC 18:2	C26H50NO7P	Lipids and lipid-like molecules	Glycerophospholipids	HMDB10386	C04230	[M+H]+	520.338	6.09374	1.73325	0.402853	0.00841063	down
LysoPC 18:3	C26H48NO7P	Lipids and lipid-like molecules	Glycerophospholipids	HMDB10388	C04230	[M+H]+	518.322	5.72783	1.46197	0.489287	0.0146318	down
LysoPC 19:1	C27H54NO7P	Lipids and lipid-like molecules	Glycerophospholipids	-	C04230	[M+FA-H]-	580.359	6.90405	1.75945	0.414039	0.00841063	down
LysoPE 14:0	C19H40NO7P	Lipids and lipid-like molecules	Glycerophospholipids	HMDB11470;HMDB11500	C04438	[M-H]-	424.244	5.56658	1.64797	0.467411	0.00841063	down
LysoPE 16:1	C21H42NO7P	Lipids and lipid-like molecules	Glycerophospholipids	HMDB11474	C04438	[M+H]+	452.276	5.81661	2.3315	0.229565	0.00841063	down
LysoPE 17:0	C22H46NO7P	Lipids and lipid-like molecules	Glycerophospholipids	-	C04438	[M-H]-	466.284	6.97305	1.84717	2.53257	0.00841063	up
LysoPE 18:0	C23H48NO7P	Lipids and lipid-like molecules	Glycerophospholipids	HMDB11129;HMDB11130	C04438	[M+H]+	482.322	7.15092	1.76083	2.26647	0.00841063	up
LysoPE 18:2	C23H44NO7P	Lipids and lipid-like molecules	Glycerophospholipids	HMDB11477	C04438	[M-H]-	476.276	6.03742	1.74346	0.42018	0.00841063	down
LysoPE 22:0	C27H56NO7P	Lipids and lipid-like molecules	Glycerophospholipids	HMDB11490	C04438	[M-H]-	536.369	7.65632	1.69272	0.403963	0.0146318	down
LysoPG 16:1; LysoPG 16:1	C22H43O9P	Lipids and lipid-like molecules	Glycerophospholipids	-	C05980	[M-H]-	481.254	4.50771	2.01105	3.29372	0.0146318	up
Nandrolone	C18H26O2	Lipids and lipid-like molecules	Sterol Lipids	HMDB0002725	C07254	[M+H]+	275.2	6.36797	1.76924	2.33617	0.00841063	up
Oxandrolone	C19H30O3	Lipids and lipid-like molecules	Sterol Lipids	HMDB0014759	C07346	[M-H]-	305.21	5.73368	1.40979	2.10967	0.0261262	up
PA 32:2; PA(14:0/18:2)	C35H65O8P	Lipids and lipid-like molecules	Glycerophospholipids	-	C00416	[M-H]-	643.417	5.74848	1.57928	2.15434	0.00841063	up
Palmitelaidic acid	C16H30O2	Lipids and lipid-like molecules	Fatty Acyls	HMDB0012328	NA	[M+Na]+	277.207	4.36175	1.82785	2.59715	0.00841063	up
PG 31:5; PG(9:0/22:5)	C37H63O10P	Lipids and lipid-like molecules	Glycerophospholipids	-	C00344	[M-H]-	697.424	4.54715	1.9995	2.99858	0.00841063	up
Plasmenyl-PC 16:0; PC(P-14:0/2:0)	C24H48NO7P	Lipids and lipid-like molecules	Glycerophospholipids	-	C00958	[M+H]+	494.322	5.8417	1.81027	0.403869	0.00841063	down
Rhodinyl phenylacetate	C18H26O2	Lipids and lipid-like molecules	Fatty Acyls	HMDB0037191	null	[M+H]+	275.2	6.02382	1.6057	2.10422	0.00841063	up
Stearidonic acid ethyl ester	C20H32O2	Lipids and lipid-like molecules	Fatty Acyls	NA	NA	[M+H]+	305.246	7.78562	2.33416	0.232075	0.00841063	down
Suberic acid	C8H14O4	Lipids and lipid-like molecules	Fatty Acyls	HMDB0000893	C08278	[M-H]-	173.1	3.019	2.39574	4.45373	0.00841063	up
trans-Traumatic acid	C12H20O4	Lipids and lipid-like molecules	Fatty Acyls	HMDB0000933	C16308	[M-H]-	227.127	4.87872	1.70222	2.17841	0.00841063	up
1-Methyladenosine	C11H15N5O4	Nucleosides, nucleotides, and analogues	Purine nucleosides	HMDB0003331	C02494	[M+H]+	282.119	1.85857	1.56395	2.02289	0.00841063	up
Cytidine-3'-monophosphate	C9H14N3O8P	Nucleosides, nucleotides, and analogues	NA	HMDB0001202	C00239	[M-H]-	322.042	0.825183	1.63689	2.0403	0.00841063	up
Flavin Mononucleotide	C17H21N4O9P	Nucleosides, nucleotides, and analogues	Flavin nucleotides	HMDB0001520	C00061	[M-H]-	455.087	2.73743	1.73985	0.451322	0.00841063	down
UDP-D-glucose	C15H24N2O17P2	Nucleosides, nucleotides, and analogues	Pyrimidine nucleotides	HMDB0000286	C00029	[M-H]-	565.045	0.877342	2.45914	0.179011	0.00841063	down
Xanthosine	C10H12N4O6	Nucleosides, nucleotides, and analogues	NA	HMDB0000299	C01762	[M-H]-	283.067	1.58555	2.5235	5.2579	0.00841063	up
2-Chloro-L-phenylalanine	C9H10ClNO2	Organic acids and derivatives	Carboxylic acids and derivatives	NA	NA	[M+H]+	200.039	0.735083	2.93596	9.1394	0.00841063	up
Allantoic acid	C4H8N4O4	Organic acids and derivatives	Carboxylic acids and derivatives	HMDB0001209	C00499	[M+H]+	177.054	3.96822	1.68348	2.20434	0.0950145	up
Astin I	C25H34ClN5O7	Organic acids and derivatives	Carboxylic acids and derivatives	HMDB0041419	C00373	[M-H]-	550.206	4.17176	1.76701	2.39153	0.00841063	up
Diplodiatoxin	C18H28O4	Organic acids and derivatives	Keto acids and derivatives	HMDB0031471	null	[M-H]-	307.19	5.90824	1.66702	2.07742	0.00841063	up
DL-Leu-DL-Val	C11H22N2O3	Organic acids and derivatives	Carboxylic acids and derivatives	NA	NA	[M+H]+	231.169	2.39706	1.62229	2.28919	0.00841063	up
Glu-Phe	C14H18N2O5	Organic acids and derivatives	Carboxylic acids and derivatives	HMDB0029156	NA	[M+H]+	295.137	2.71	1.70277	0.417247	0.041915	down
Histidine	C6H9N3O2	Organic acids and derivatives	Carboxylic acids and derivatives	HMDB0000177	C00135	[M+H]+	156.101	0.897933	1.71367	0.448905	0.00841063	down
Ile-Pro	C11H20N2O3	Organic acids and derivatives	Carboxylic acids and derivatives	HMDB0011174	NA	[M+H]+	229.154	2.37521	1.6784	2.09449	0.00841063	up
Isoleucine	C6H13NO2	Organic acids and derivatives	Carboxylic acids and derivatives	HMDB0000172	C00407	[M+H]+	132.102	1.47563	2.17455	3.4268	0.00841063	up
L-(-)-Phenylalanine	C9H11NO2	Organic acids and derivatives	Carboxylic acids and derivatives	NA	NA	[M-H]-	164.071	2.03442	1.67343	2.07262	0.00841063	up
L-Norleucine	C6H13NO2	Organic acids and derivatives	Carboxylic acids and derivatives	HMDB0001645	C01933	[M-H]-	130.087	1.46128	2.23173	3.63853	0.00841063	up
N-Acetyl-L-phenylalanine	C11H13NO3	Organic acids and derivatives	Carboxylic acids and derivatives	HMDB0000512	C03519	[M-H]-	206.082	3.16833	1.99372	2.79911	0.00841063	up
Penicillamine	C5H11NO2S	Organic acids and derivatives	Carboxylic acids and derivatives	HMDB0014997	C07418	[M+H]+	150.054	2.73732	2.46859	0.206013	0.00841063	down
Linoleoyl ethanolamide	C20H37NO2	Organic nitrogen compounds	Organonitrogen compounds	HMDB0012252	NA	[M+H]+	324.288	7.20542	1.97678	2.76828	0.00841063	up
Spermidine	C7H19N3	Organic nitrogen compounds	Organonitrogen compounds	HMDB0001257	C00315	[M+H]+	146.164	0.639892	1.89454	0.390013	0.00841063	down
(E)-2-Butenal	C4H6O	Organic oxygen compounds	Organooxygen compounds	HMDB0034233	null	[M+Hac-H]-	129.055	3.03883	1.80185	2.33537	0.00841063	up
19alpha-19-Hydroxy-3,11-dioxo-12-ursen-28-oic acid	C29H42O5	Organic oxygen compounds	Organooxygen compounds	HMDB0038683	null	[M-H]-	469.303	7.30787	1.40117	2.02781	0.0146318	up
3-Hydroxychavicol 1-glucoside	C15H20O7	Organic oxygen compounds	Organooxygen compounds	HMDB0034861	null	[M+NH4]+	330.154	0.848775	2.15085	0.294444	0.00841063	down
5-(3',4',5'-Trihydroxyphenyl)-gamma-valerolactone-3'-O-glucuronide	C17H20O11	Organic oxygen compounds	Organooxygen compounds	HMDB0059984	null	[M-H]-	399.094	0.80035	1.86847	2.6258	0.00841063	up
Cytidine 2'-phosphate	C9H14N3O8P	Organic oxygen compounds	Organooxygen compounds	HMDB0011692	C03104	[M+H]+	324.058	0.838425	1.74479	2.19896	0.00841063	up
D-(+)-Raffinose	C18H32O16	Organic oxygen compounds	NA	HMDB0003213	C00492	[M-H]-	503.159	1.19552	1.67344	2.11571	0.00841063	up
Sucrose	C12H22O11	Organic oxygen compounds	NA	HMDB0000258	C00089	[M-H]-	341.106	0.80995	2.41534	0.212618	0.00841063	down
(+/-) Salsolinol	C10H13NO2	Organoheterocyclic compounds	Tetrahydroisoquinolines	HMDB0042012	C09642	[M+H]+	180.101	1.24427	1.801	0.42749	0.00841063	down
(卤)-Tryptophan	C11H12N2O2	Organoheterocyclic compounds	Indoles and derivatives	HMDB0030396	C00806	[M+H]+	205.097	2.38808	2.09447	3.12085	0.00841063	up
1H-Indazole-3-carboxamide, 1-(5-hydroxypentyl)-N-tricyclo[3.3.1.1(3,7)]dec-1-yl-	C23H31N3O2	Organoheterocyclic compounds	Indoles and derivatives	NA	NA	[M+H]+	382.234	6.48878	1.68689	2.36028	0.00841063	up
1-Pyrroline	C4H7N	Organoheterocyclic compounds	Pyrrolines	HMDB0012497	C15668	[M+H]+	70.0646	0.828275	1.63972	2.01227	0.00841063	up
2-Methylindole	C9H9N	Organoheterocyclic compounds	Indoles and derivatives	NA	NA	[M+H]+	132.08	2.38808	1.92311	2.61722	0.00841063	up
3-Formylindole	C9H7NO	Organoheterocyclic compounds	Indoles and derivatives	HMDB0029737	C08493	[M+H]+	146.059	2.38528	2.0008	2.83091	0.00841063	up
3-Indoleacetic acid	C10H9NO2	Organoheterocyclic compounds	Indoles and derivatives	HMDB0000197	C00954	[M-H]-	174.04	2.13638	1.96554	0.343871	0.00841063	down
4-Hydroxyquinoline	C9H7NO	Organoheterocyclic compounds	Quinolines and derivatives	NA	NA	[M-H]-	144.045	3.66822	1.87129	2.49222	0.00841063	up
5'-Carboxy-alpha-chromanol	C19H28O4	Organoheterocyclic compounds	Benzopyrans	HMDB0012798	null	[M-H]-	319.189	5.17719	1.88921	2.6516	0.00841063	up
Carprofen	C15H12ClNO2	Organoheterocyclic compounds	Indoles and derivatives	HMDB0014959	C18364	[M-H]-	272.053	3.17037	1.77583	2.279	0.00841063	up
Garbogiol	C18H16O6	Organoheterocyclic compounds	Benzopyrans	HMDB0033169	null	[M-H]-	327.092	1.53938	1.66049	0.482624	0.00841063	down
Indole	C8H7N	Organoheterocyclic compounds	Indoles and derivatives	HMDB0000738	C00463	[M+H]+	118.064	2.38808	1.9882	2.85012	0.00841063	up
Kynurenic acid	C10H7NO3	Organoheterocyclic compounds	Quinolines and derivatives	HMDB0000715	C01717	[M+H]+	190.075	2.38828	1.91805	2.60887	0.00841063	up
N,N-dimethylindoliumolate	C10H11NO2	Organoheterocyclic compounds	Indoles and derivatives	HMDB0060063	null	[M+H]+	178.086	1.69844	1.70348	0.461684	0.00841063	down
Oxypurinol	C5H4N4O2	Organoheterocyclic compounds	Imidazopyrimidines	HMDB0000786	C07599	[M+H]+	153.04	1.60481	2.06708	3.02798	0.00841063	up
Piperidine	C5H11N	Organoheterocyclic compounds	Piperidines	HMDB0034301	C01746	[M+H]+	86.0966	1.4073	2.2509	3.75712	0.00841063	up
Pyrrolidine	C4H9N	Organoheterocyclic compounds	Pyrrolidines	HMDB0031641	null	[M+H]+	72.0803	0.849167	1.7169	2.17078	0.00841063	up
Sedanolide	C12H18O2	Organoheterocyclic compounds	Lactones	HMDB0034450	NA	[M+H]+	195.137	4.54849	1.6987	2.16871	0.00841063	up
Tryptophan	C11H12N2O2	Organoheterocyclic compounds	Indoles and derivatives	HMDB0000929	C00078	[M-H]-	203.082	2.37294	2.20655	3.52173	0.00841063	up
Uric acid	C5H4N4O3	Organoheterocyclic compounds	Imidazopyrimidines	HMDB0000289	C00366	[M+H]+	169.058	0.768967	1.86236	2.51291	0.00841063	up
Venoterpine	C9H11NO	Organoheterocyclic compounds	Pyridines and derivatives	HMDB0030175	null	[M+FA-H]-	194.079	3.019	1.93539	2.70699	0.00841063	up
Xanthine	C5H4N4O2	Organoheterocyclic compounds	Imidazopyrimidines	HMDB0000292	C00385	[M-H]-	151.025	1.22165	2.01146	2.88832	0.00841063	up
3-(4-Hydroxy-3-methoxyphenyl)-2-methyllactic acid	C11H14O5	Phenylpropanoids and polyketides	Phenylpropanoic acids	HMDB0060736	null	[M-H]-	225.076	2.85495	1.6698	0.463233	0.00841063	down
3,7,8,4'-Tetramethoxyflavone	C19H18O6	Phenylpropanoids and polyketides	Flavonoids	NA	NA	[M+H]+	343.116	5.00525	2.19228	3.56762	0.00841063	up
3-Methoxynobiletin	C22H24O9	Phenylpropanoids and polyketides	Flavonoids	HMDB0037689	null	[M+H]+	433.147	5.55371	2.17835	3.49173	0.00841063	up
4'-Hydroxy-3',5,6,7,8-pentamethoxyflavone	C20H20O8	Phenylpropanoids and polyketides	Flavonoids	HMDB0029547	null	[M+H]+	389.121	5.89734	2.42501	4.67944	0.00841063	up
5,7,3'-Trihydroxy-4'-methoxyflavanone	C16H14O6	Phenylpropanoids and polyketides	Flavonoids	HMDB0030746	null	[M+H]+	303.086	3.36562	2.29055	3.89752	0.00841063	up
7-Hydroxy-3-(4-methoxyphenyl)-4-phenylcoumarin	C22H16O4	Phenylpropanoids and polyketides	Coumarins and derivatives	NA	NA	[M-H]-	343.102	3.51606	1.76122	2.25523	0.00841063	up
Ampelopsin D	C28H22O6	Phenylpropanoids and polyketides	Stilbenes	HMDB0040894	null	[M-H]-	453.14	3.74072	2.84291	8.58668	0.00841063	up
Grossamide	C36H36N2O8	Phenylpropanoids and polyketides	2-arylbenzofuran flavonoids	HMDB0040370	null	[M-H]-	623.237	4.50816	2.07481	3.08217	0.00841063	up
Hesperetin	C16H14O6	Phenylpropanoids and polyketides	Flavonoids	HMDB0005782	C01709	[M-H]-	301.07	3.34613	2.30983	4.05782	0.00841063	up
Hesperidin	C28H34O15	Phenylpropanoids and polyketides	Flavonoids	HMDB0003265	C09755	[M-H]-	609.18	3.34678	2.52919	5.31867	0.00841063	up
Ibuprofen	C13H18O2	Phenylpropanoids and polyketides	Phenylpropanoic acids	HMDB0001925	C01588	[M+H]+	207.137	5.13882	1.71523	2.27006	0.00841063	up
Nobiletin	C21H22O8	Phenylpropanoids and polyketides	Flavonoids	HMDB0029540	C10112	[M+H]+	403.138	5.34205	2.33645	4.19934	0.00841063	up
Quercetin 3,5,7,3',4'-pentamethyl ether	C20H20O7	Phenylpropanoids and polyketides	Flavonoids	NA	NA	[M+Na]+	395.108	5.63262	2.40157	4.45887	0.00841063	up
Scutellarein tetramethyl ether	C19H18O6	Phenylpropanoids and polyketides	Flavonoids	HMDB0030575	C14472	[M+H]+	343.116	5.33424	2.19006	3.98024	0.00841063	up
Tangeritin	C20H20O7	Phenylpropanoids and polyketides	Flavonoids	HMDB0030539	C10190	[M+H]+	373.128	5.63841	2.43829	4.70296	0.00841063	up
20.beta.-Hydroxyprednisolone	C21H30O5	Unknown	-	NA	NA	[M+H]+	363.214	4.94206	1.64572	2.40438	0.00841063	up
3.alpha.,4.beta.-Galactotriose	C18H32O16	Unknown	-	NA	NA	[M-H]-	503.151	7.3148	1.58746	2.20377	0.041915	up
9-Oxo-10E,12Z,15Z-octadecatrienoic acid	C18H28O3	Unknown	-	NA	NA	[M+H]+	293.211	4.34975	2.13712	3.30486	0.00841063	up
9-Oxo-11-(3-pentyl-2-oxiranyl)-10E-undecenoic acid	C18H30O4	Unknown	-	NA	NA	[M-H]-	309.205	6.22072	1.72635	2.20337	0.00841063	up
Coniferyl aldehyde	C10H10O3	Unknown	-	NA	C02666	[M-H]-	177.065	2.69117	1.68178	0.479316	0.00841063	down
DL-2-Fluorophenylglycine	C8H8FNO2	Unknown	-	NA	NA	[M+H]+	170.059	2.38828	2.00969	2.85157	0.00841063	up
Hexadecanedioic acid, 3,3,14,14-tetramethyl-	C20H38O4	Unknown	-	NA	NA	[M-H]-	341.267	7.26581	1.84751	2.47752	0.00841063	up
Isopropyl methylphosphonic acid	C4H11O3P	Unknown	-	NA	NA	[M+Hac-H]-	197.055	1.84832	1.70823	0.466971	0.00841063	down
Linoleoylglycine	C20H35NO3	Unknown	-	NA	NA	[M+FA-H]-	382.257	5.86718	1.89057	2.64608	0.00841063	up
Methyl 4,6-O-benzylidene-.alpha.-D-glucopyranoside	C14H18O6	Unknown	-	NA	NA	[M+NH4]+	300.144	0.848775	1.92504	0.384511	0.00841063	down
N-Caffeoyl-O-methyltyramine	C18H19NO4	Unknown	-	NA	NA	[M-H]-	312.122	3.85934	1.9893	2.83207	0.00841063	up
Ser-Gly-Ser	C8H15N3O6	Unknown	-	NA	NA	[M+H]+	250.107	0.8694	1.61631	0.493374	0.00841063	down
Thymopoietin II (32-34)	C16H31N7O6	Unknown	-	NA	NA	[M-H]-	416.208	3.46642	1.8393	0.412332	0.00841063	down
