# Supplementary material for: Transcriptome and Metabolome Analyses Revealed the Response Mechanism of Sugar Beet to Salt Stress of Different Durations
Source: Int J Mol Sci. 2022 Aug 24;23(17):9599. doi: 10.3390/ijms23179599 (PMC9455719; doi:10.3390/ijms23179599)
Supplement: Supplementary file 1 [file ijms-23-09599-s001.zip › Table S6 Overview of salt treatment duration and Sampling time.xlsx]

## Sheet: Sheet1
Table S1 Overview of salt treatment duration and Sampling time
group name	Start	Sampling	Salt treatment duration	Transcriptome	Metabolomic
leaf_ck		31 day	0 h	×3	×6
leaf_12	30.5 day	31 day	12 h	×3	×6
leaf_24	30 day	31 day	24 h	×3
leaf_48	29 day	31 day	48 h	×3
leaf_72	28 day	31 day	72 h	×3
root_ck		31 day	0 h	×3	×6
root_12	30.5 day	31 day	12 h	×3	×6
root_24	30 day	31 day	24 h	×3
root_48	29 day	31 day	48 h	×3
root_72	28 day	31 day	72 h	×3
