# Supplementary material for: Transcriptome and Metabolome Analyses Revealed the Response Mechanism of Sugar Beet to Salt Stress of Different Durations
Source: Int J Mol Sci. 2022 Aug 24;23(17):9599. doi: 10.3390/ijms23179599 (PMC9455719; doi:10.3390/ijms23179599)
Supplement: Supplementary file 1 [file ijms-23-09599-s001.zip › Table S7 List of primers used for qRT-PCR experiments.xlsx]

## Sheet: Sheet1
Table S2 List of primers used for qRT-PCR experiments
gene ID	Forward primer	Universal Reverse Primer
PP2A	TCGTGTCCAAGAAGTGCCTC	CACAACGGTCATCAGGGTCA
UBQ5	TCTGCTGGAAGAGCCTTTGG	TTGTCGCCGCTCTTTACACT
25S RNA	AGACAAGAAGGGGCAACGAG	CACATTGGACGGGGCTTTTC
Bv5_110540_snec	CCTGCTATTTTCACCCCACCT	GCGGAAGTAGAGGCACCAA
Bv8_188700_tujs	AAACAGCGTCAGTGTGTGGA	CGAAAGCAAACGCAACAGGA
Bv6_149900_ooqf	GTGGATTCGAGCCGCTTTTC	CTCTTGGCCAGAAGGAGCAA
Bv2_023810_guyf	GTCTTCGCCTGTGAGAACCT	TGGCTGTTCTGTTGGGTTGT
Bv1_016400_jjoj	GGTGCGACGGGTAAAGAGAT	ATCCGATCATAATCCGCCCG
Bv7_172340_kzsr	GTAACCCGGCCCTAATGTGT	CACCGATCTAACACGGCGAA
Bv4_085000_ftde	CCTTCACCTCCCACTGCATC	ATGATTTTGCGCCTGCGAC
Bv9_203980_yzjw	CCACGGCGTCAATCATCTCT	GCAATGGAATTAGCTCGCGG
Bv2_042370_frtc	ATACATTCAACTCTCCACGCCA	AGATCCAGCTGACAATCTTGCT
Bv2_032580_hyiw	AAACGGGAAAGCAGGACCAA	GGGTTATACGTTGCCATTATTGAGG
Bv4_077620_xkxs	TCGAGCAGTATTCGGGCTTC	ATCAACCCCTTGACATCGCC
Bv2_042180_yfwq	CTCCCTTGCAAATTGTGGCT	GCTCCAAAACCCCTGGTAGAA
Bv6_131780_uxzh	GTTGATCCGCCTTGGCTTTG	AAGGCCACTAAAGGAACACCA
Bv6_129310_ndoa	CAAAGCGCGTCTAGGGAACA	CCGGTTTTCCACCTCCACAA
Bv2_046760_tquf	GGATTTCACGGCAAAGGGGA	GCATAGAGTGGTACAGGGCA
Bv5_124870_ydpo	CCTCGCCATTCCTACCTGTG	GGGTTTGCTAAGAGACCGCA
Bv6_128830_heit	CCGAAACACTCGCAAAACCC	GAAGAAAAGGAGGTCCGGCA
Bv9_208590_puum	GGGATGGCTCGAGTGATGTT	TTATCGGAACCCCCTTTGCC
Bv7_160700_mwox	GAAGGTGGGGCTGAGATTGG	GCAATAAACCAGCACCTCCAC
Bv_008200_zqtr	ACGAGGATGAAATGAGGCGG	CCATGCTTTCAGCCTTCCCT
