# Supplementary figures and images for: Transcriptome and Metabolome Analyses Revealed the Response Mechanism of Sugar Beet to Salt Stress of Different Durations
Source: MDPI journal article supplement (doi:10.3390/ijms23179599), 2022-08-24

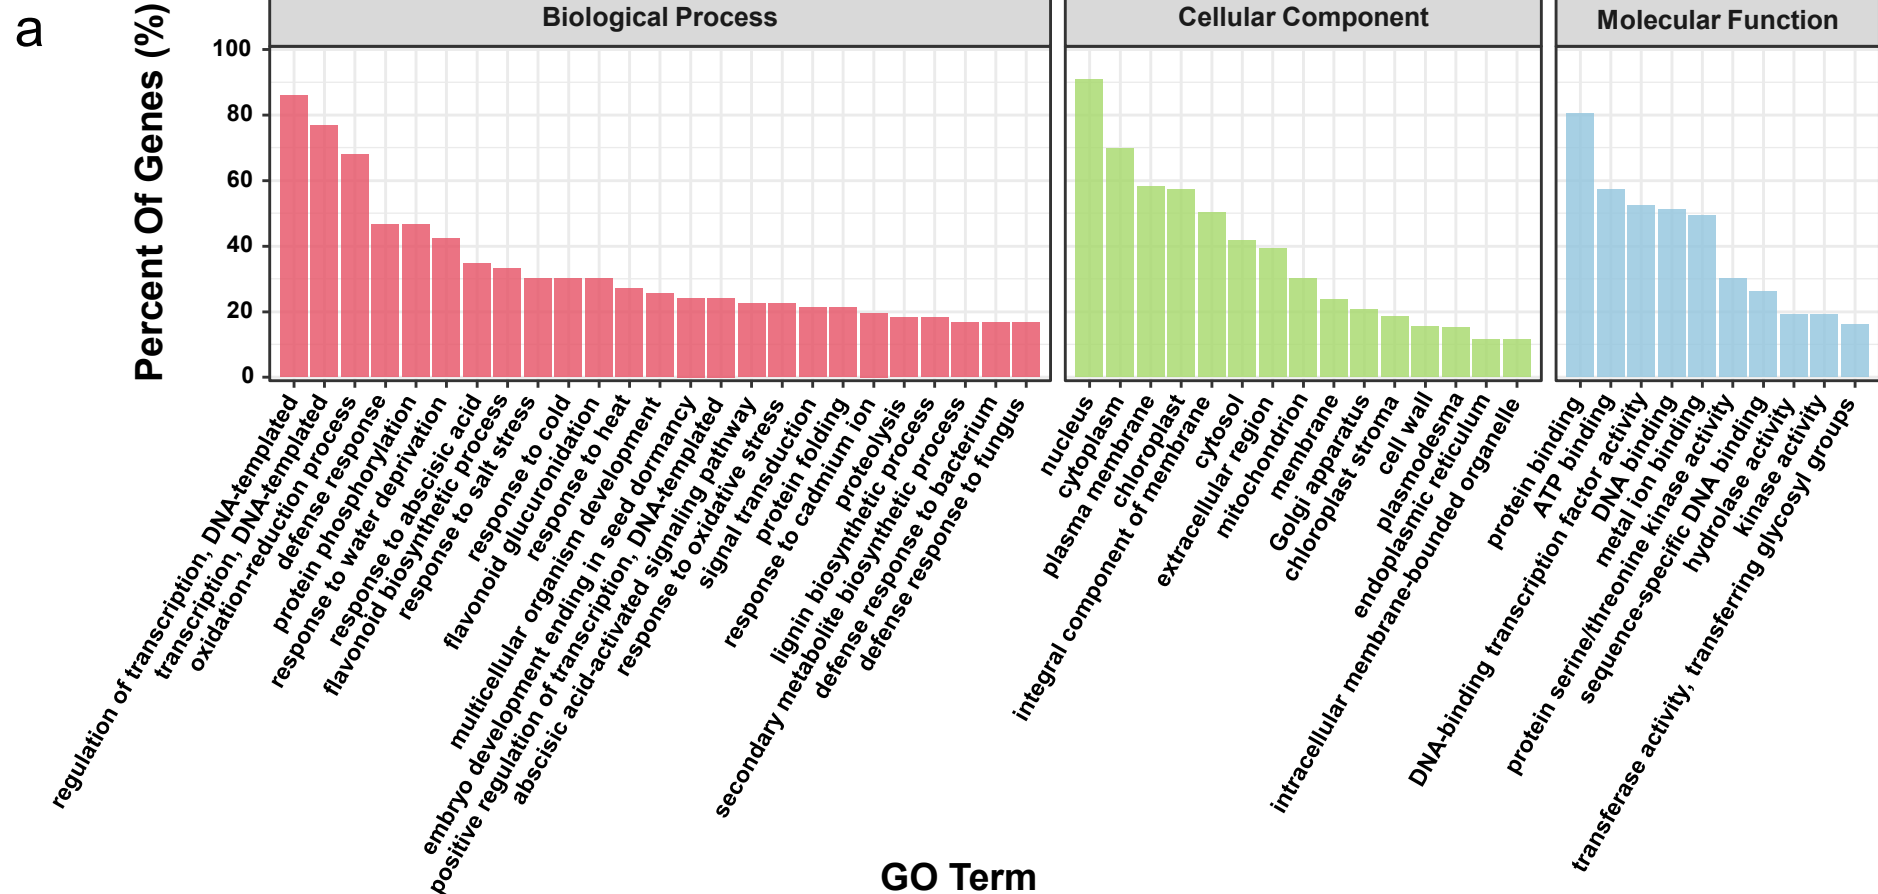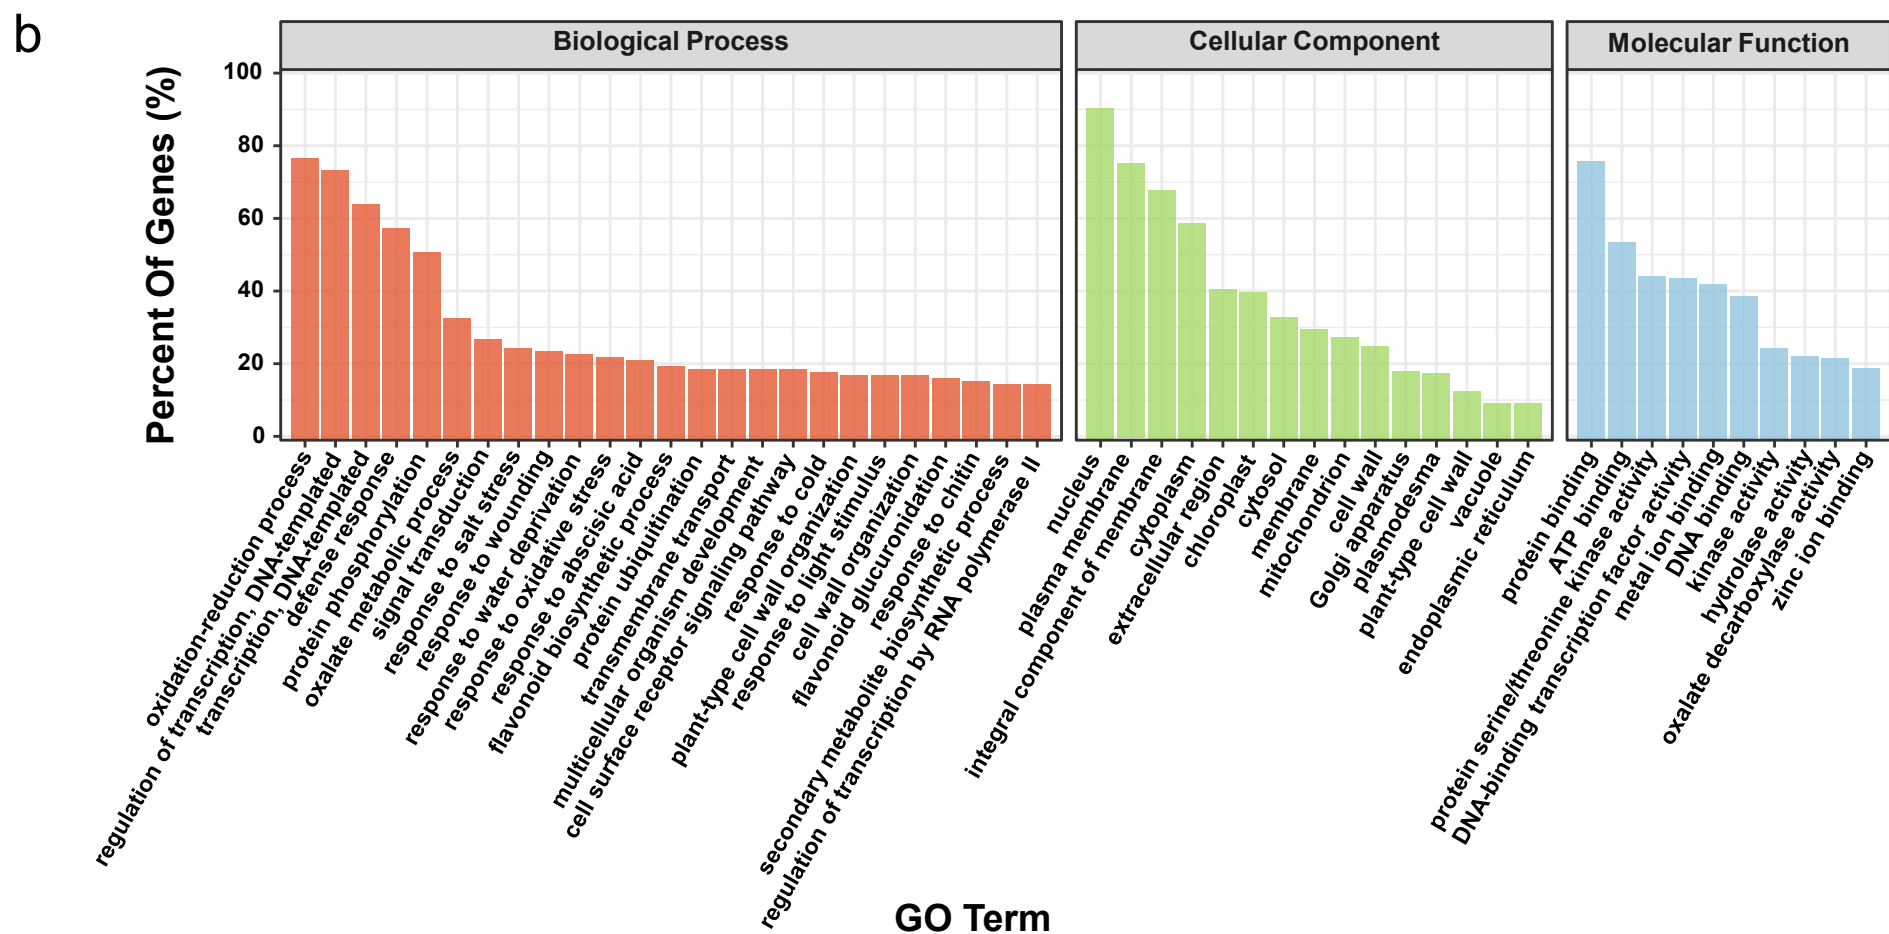

**Fig.S4 GO annotation of common DEGs in leaves (a) and roots (b).**

Supplement: s1 [file s1]

a

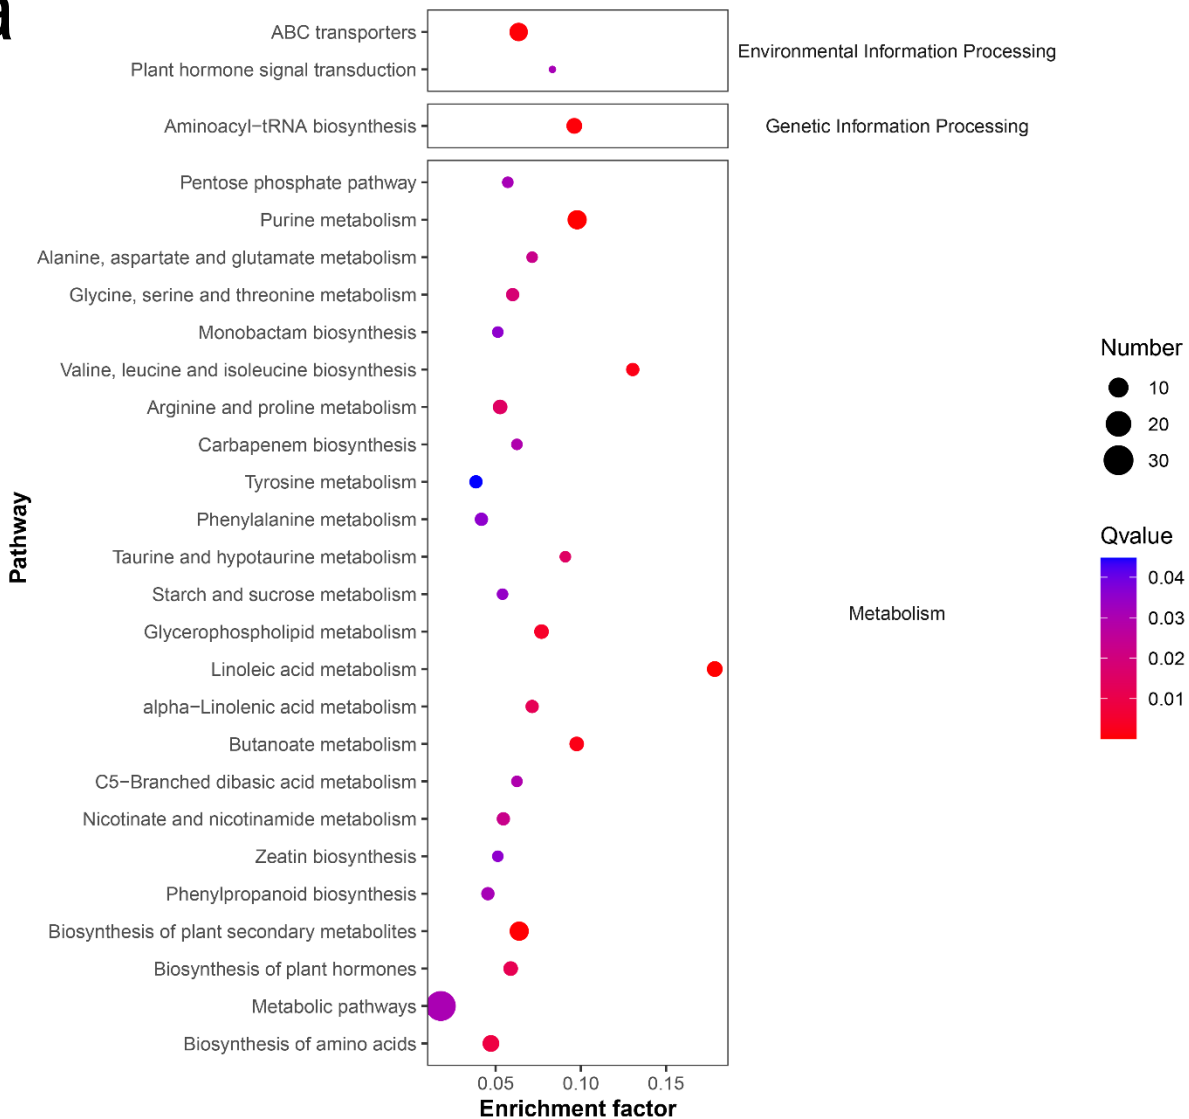

b

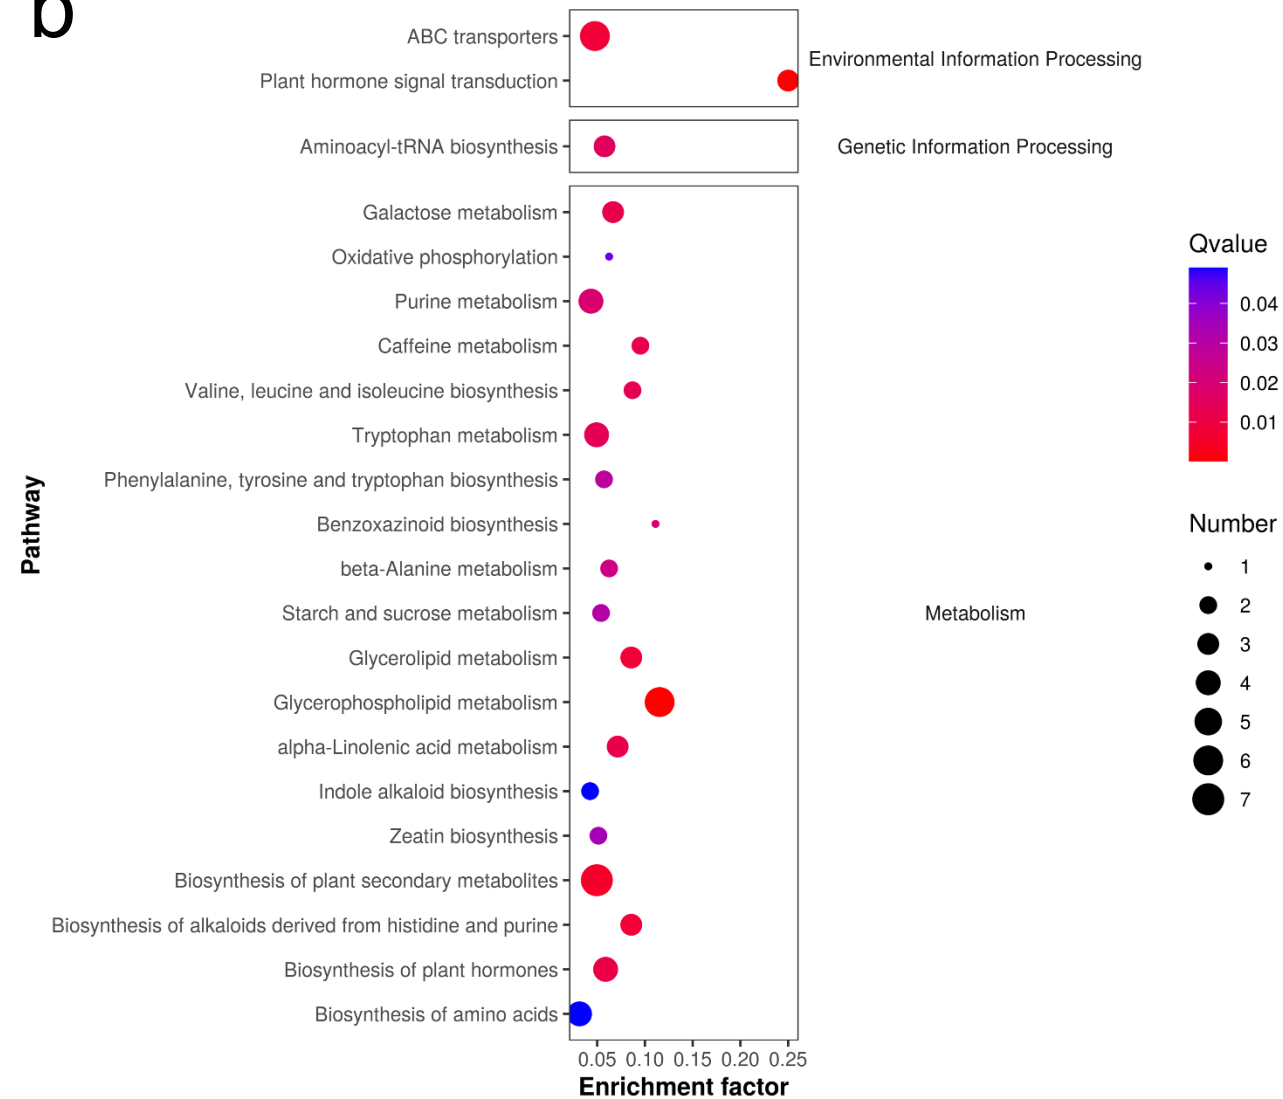

Fig.S8 KEGG annotation of DEMs in leaves(a) and roots(b).

Supplement: s1 [file s1]

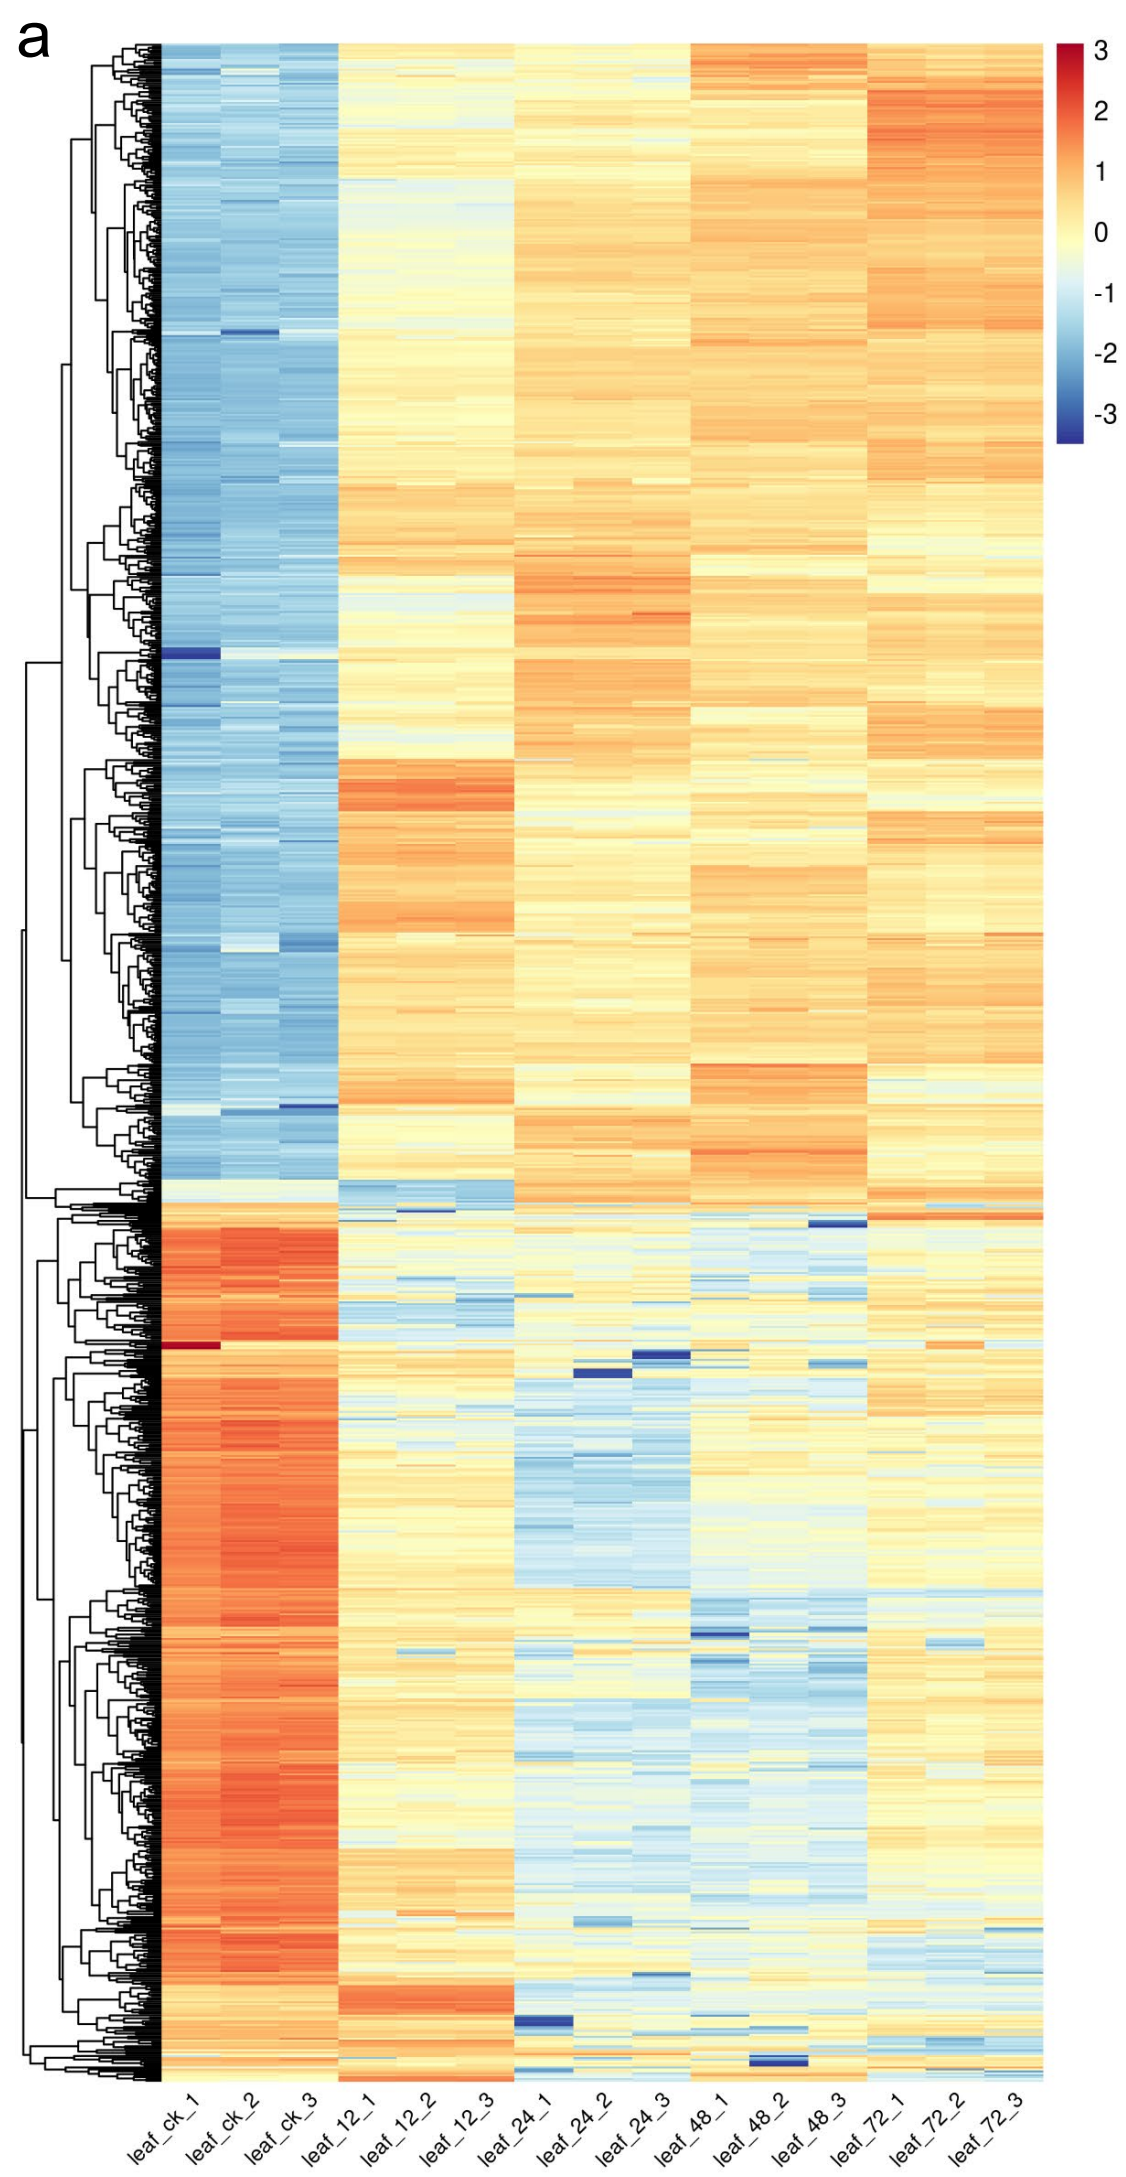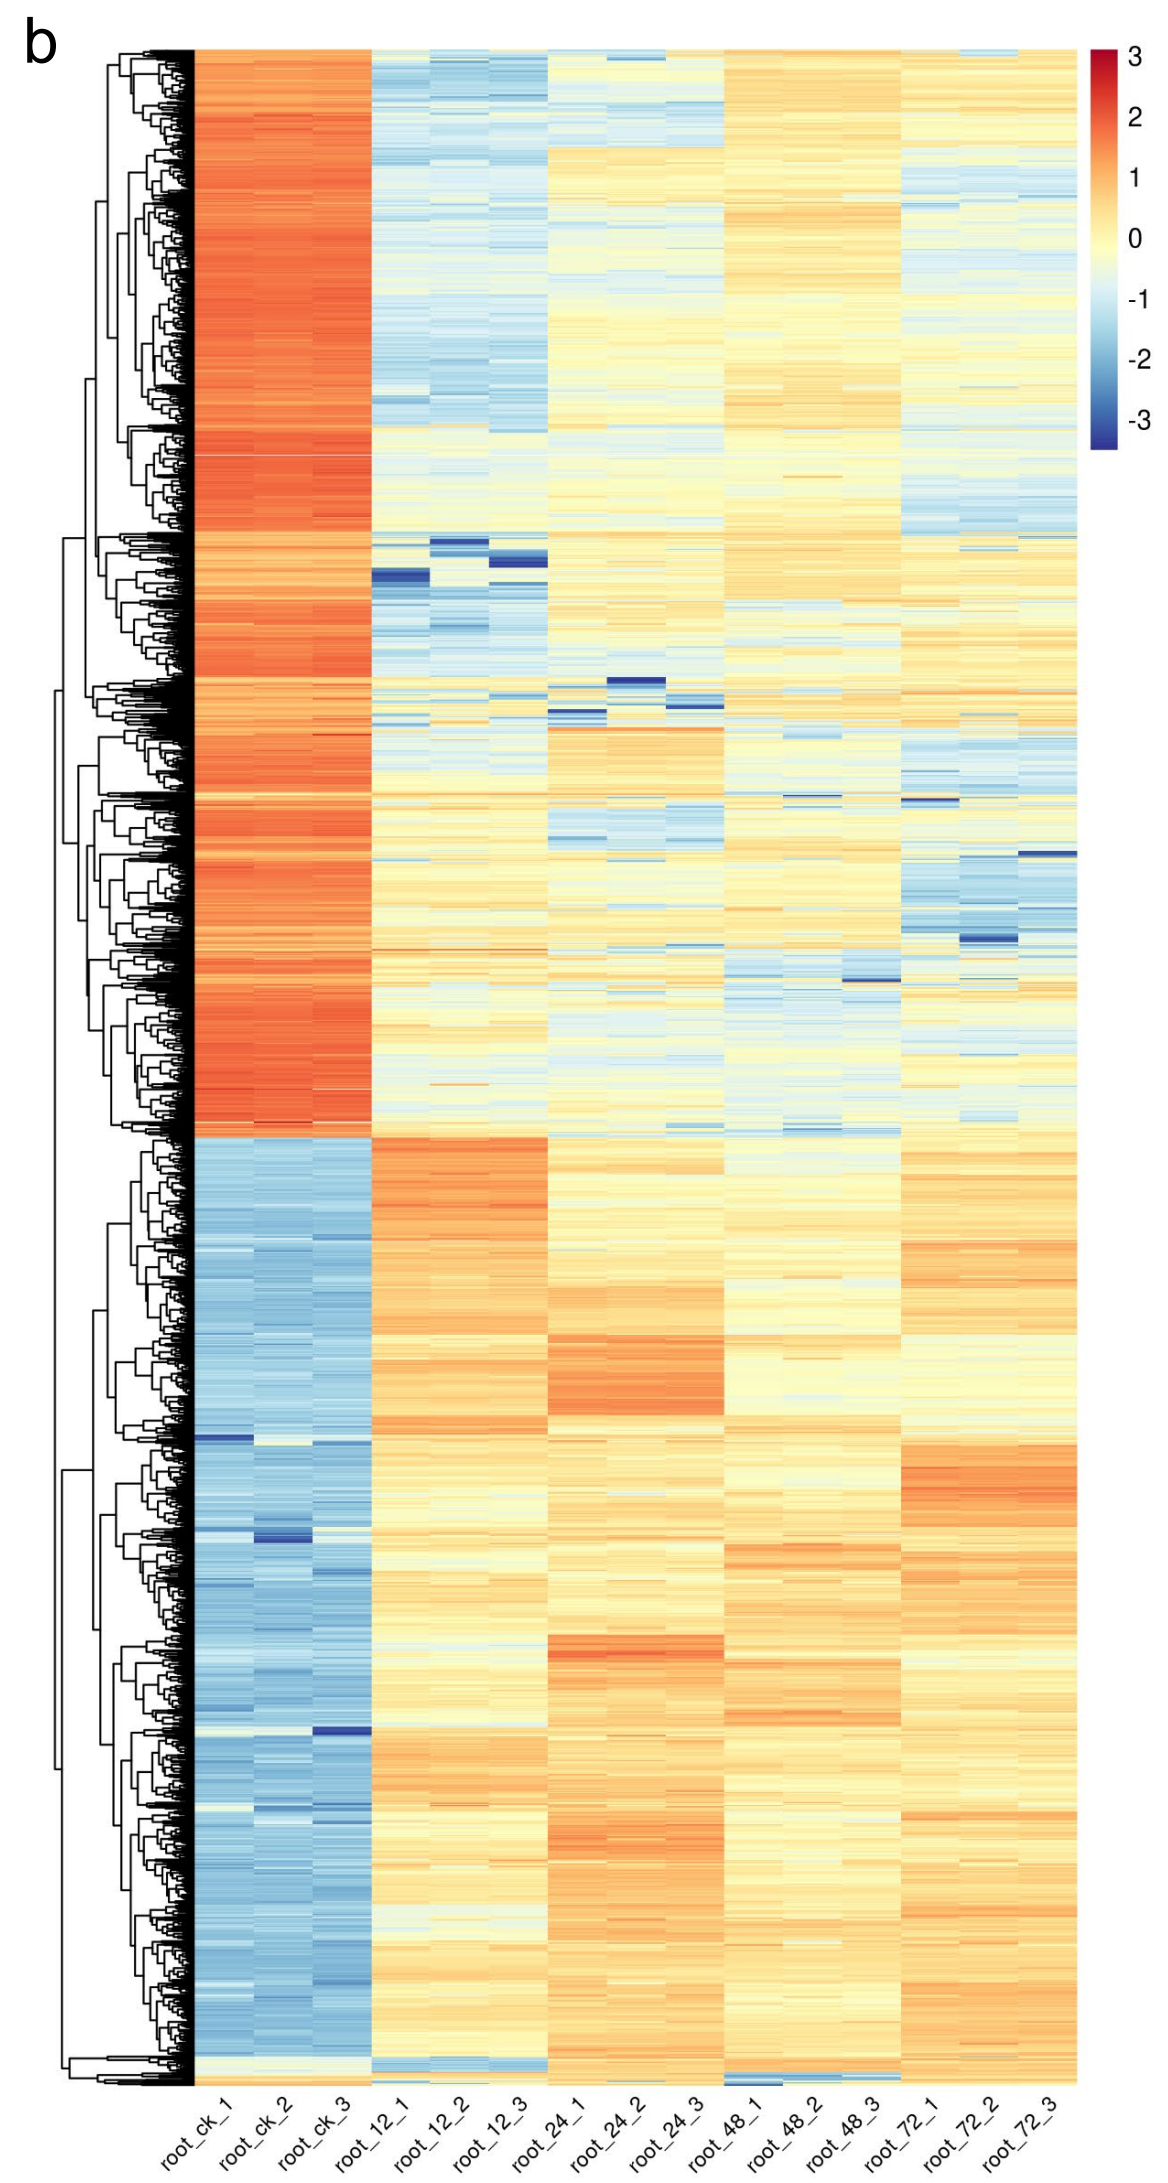

**Fig.S3 Expression patterns of common DEGs. (a)leaves (b)roots.**

Supplement: s1 [file s1]
